# Supplementary material for: Identification of a Two-Gene (PML-EPB41) Signature With Independent Prognostic Value in Osteosarcoma
Source: Front Oncol. 2020 Jan 24;9:1578. doi: 10.3389/fonc.2019.01578 (PMC6992559; doi:10.3389/fonc.2019.01578)
Supplement: Supplementary file 3 [file Table_3.csv]

Table S3. gProfiler_hsapiens_intersections
source	term_name	term_id	adjusted_p_value	negative_log10_of_adjusted_p_value	term_size	query_size	intersection_size	effective_domain_size	intersections
GO:MF	enzyme binding	GO:0019899	1.75E-82	81.7557498	2228	617	266	18098	CLTA,UBE2D3,PTPN6,STK38,ANKRD1,COMP,NR1H2,CSDA,CEP250,MYH6,SIGLEC10,FMNL3,RAB8A,NIPBL,SIRT2,PRKCD,RYR1,TRIB1,MYOCD,MYOM1,TIAM2,RFC4,TOP2A,BHLHB3,RXRA,INF2,NEK6,AATF,EPAS1,CAP1,CYTH2,RAF1,SLN,CDKN2A,TPR,FGD5,UBA52,UBC,TP53,YWHAZ,ESR1,GRB2,SRC,TRAF6,HDAC1,AR,EGFR,SMAD3,JUN,SMAD2,BRCA1,IKBKG,YWHAG,CTNNB1,MAPK1,IKBKE,PIK3R1,FYN,MDM2,ABL1,AKT1,NR3C1,UBE2D2,RB1,PRKCA,ACTB,RELA,SP1,HDAC2,UBE2I,STAT3,PRK…
GO:MF	transcription factor binding	GO:0008134	1.82E-57	56.73897458	686	617	129	18098	RORC,ANKRD1,NR1H2,FHL2,SIRT2,NR4A1,TRIB1,PSMC2,MYOCD,BHLHB3,RXRA,NEK6,GTF2E2,EPAS1,TACC1,RUNX2,FOS,CDKN2A,TP53,YWHAZ,ESR1,SRC,EP300,CREBBP,HDAC1,MYC,AR,SMAD3,JUN,SMAD2,BRCA1,CTNNB1,MAPK1,PIK3R1,RB1,ACTB,RELA,SP1,HDAC2,UBE2I,SMAD4,NFKB1,STAT3,RARA,PCNA,VHL,PRKDC,NCOR1,SIN3A,HDAC3,PARP1,SMARCA4,NCOR2,NPM1,STAT1,NFKBIA,TBP,NCOA1,NCOA3,RUVBL2,GSK3B,PPARG,CEBPB,SUMO1,SUMO2,HDAC4,MAPK14,FLNA,DAXX,HIF1A…
GO:MF	DNA-binding transcription factor binding	GO:0140297	1.02E-46	45.98962031	360	617	87	18098	ANKRD1,FHL2,NR4A1,MYOCD,BHLHB3,RXRA,NEK6,TACC1,RUNX2,FOS,CDKN2A,ESR1,SRC,EP300,CREBBP,HDAC1,MYC,SMAD3,JUN,SMAD2,BRCA1,CTNNB1,RB1,ACTB,RELA,SP1,HDAC2,STAT3,PCNA,NCOR1,SIN3A,HDAC3,PARP1,SMARCA4,NCOR2,NPM1,STAT1,NFKBIA,TBP,NCOA1,NCOA3,GSK3B,PPARG,CEBPB,SUMO1,HDAC4,MAPK14,DAXX,HIF1A,SIRT1,NCOA6,VDR,HTATIP,CREB1,HDAC5,MYOD1,YWHAH,BCL2,ARRB1,PRKCB,NCOA2,TLE1,RBL1,NRIP1,ATF2,SRF,GTF2B,NR0B2,STAT5B,STRN,…
GO:MF	kinase binding	GO:0019900	1.11E-44	43.95511578	733	617	118	18098	PTPN6,STK38,CEP250,MYH6,RAB8A,PRKCD,TRIB1,MYOM1,TOP2A,NEK6,AATF,RAF1,CDKN2A,TPR,TP53,YWHAZ,ESR1,GRB2,SRC,TRAF6,EGFR,SMAD3,YWHAG,CTNNB1,MAPK1,PIK3R1,ABL1,AKT1,NR3C1,RB1,ACTB,RELA,STAT3,PRKACA,RARA,PCNA,PTPN11,PLCG1,LCK,CBL,SHC1,PARP1,NPM1,CRK,GSK3B,EEF1A1,CEBPB,SMAD1,IKBKB,NCK1,HDAC4,MAPK14,JAK2,FLNA,DAXX,SYK,PIN1,CDKN1A,HIF1A,PRKCZ,PLK1,SIRT1,PRKAB1,IRS1,STUB1,SFN,CDK9,CDC42,PAK1,APC,CAV1,HSP90AA…
GO:MF	RNA polymerase II-specific DNA-binding transcription factor binding	GO:0061629	5.05E-42	41.29711532	282	617	74	18098	ANKRD1,FHL2,NR4A1,MYOCD,BHLHB3,RXRA,TACC1,FOS,CDKN2A,ESR1,SRC,EP300,CREBBP,HDAC1,SMAD3,JUN,BRCA1,CTNNB1,RB1,ACTB,RELA,SP1,HDAC2,STAT3,PCNA,NCOR1,SIN3A,HDAC3,PARP1,SMARCA4,NCOR2,NPM1,STAT1,NFKBIA,TBP,NCOA1,NCOA3,GSK3B,PPARG,CEBPB,SUMO1,MAPK14,DAXX,HIF1A,SIRT1,NCOA6,VDR,HTATIP,CREB1,MYOD1,YWHAH,ARRB1,PRKCB,NCOA2,RBL1,NRIP1,ATF2,SRF,GTF2B,NR0B2,STAT5B,STRN,PHB2,CHD4,SMARCB1,PPARA,JUND,SMARCE1,PPARGC…
GO:MF	protein kinase binding	GO:0019901	1.11E-41	40.9530149	653	617	108	18098	PTPN6,STK38,CEP250,MYH6,RAB8A,PRKCD,TRIB1,TOP2A,NEK6,AATF,RAF1,CDKN2A,TPR,TP53,YWHAZ,ESR1,GRB2,SRC,TRAF6,EGFR,SMAD3,YWHAG,CTNNB1,MAPK1,PIK3R1,ABL1,AKT1,NR3C1,ACTB,RELA,STAT3,PRKACA,RARA,PCNA,PTPN11,PLCG1,LCK,CBL,SHC1,PARP1,NPM1,CRK,GSK3B,EEF1A1,SMAD1,IKBKB,NCK1,HDAC4,MAPK14,JAK2,DAXX,SYK,PIN1,CDKN1A,HIF1A,PRKCZ,PLK1,SIRT1,PRKAB1,IRS1,SFN,CDK9,CDC42,PAK1,APC,CAV1,HSP90AA1,E2F1,HDAC5,ARRB1,CDC37,AR…
GO:MF	ubiquitin-like protein ligase binding	GO:0044389	3.24E-39	38.49006043	307	617	74	18098	UBE2D3,TRIB1,NEK6,UBA52,UBC,TP53,YWHAZ,SRC,TRAF6,EGFR,SMAD3,JUN,SMAD2,BRCA1,IKBKG,IKBKE,MDM2,UBE2D2,RB1,RELA,PRKACA,UBB,RPS27A,PML,HSPA8,YWHAE,STAT1,NFKBIA,GSK3B,CEBPB,SUMO1,LYN,TUBB,SUMO2,POLR2A,DAXX,CDKN1A,HIF1A,XRCC5,STUB1,CASP8,TRIM28,APC,HGS,ACTG1,HSP90AA1,HSPA5,HSPA1A,MYOD1,BCL2,JAK1,ARRB1,ARRB2,SQSTM1,TNFRSF1B,PARK2,PTK2B,VCP,HDAC6,USP7,TSG101,GABARAPL2,PSMA3,RPA2,ITCH,TCP1,CUL4A,PPARGC1A,…
GO:MF	protein domain specific binding	GO:0019904	4.93E-39	38.30718439	708	617	109	18098	NFE2,PTPN6,CEP250,SIGLEC10,NIPBL,TCAP,ESPN,RXRA,AATF,RUNX2,CDKN2A,TP53,YWHAZ,GRB2,SRC,HDAC1,AR,JUN,SMAD2,IKBKG,YWHAG,CTNNB1,FYN,MDM2,ABL1,RB1,RELA,SP1,UBE2I,PRKACA,RARA,PTPN11,PRKDC,LCK,CBL,YWHAQ,YWHAB,HSPA8,YWHAE,CRK,NCOA3,PPARG,LYN,VIM,TUBB,SRRM2,NCK1,JAK2,SYK,HIF1A,SIRT1,APP,IRS1,STUB1,SFN,TERF1,CASP8,TRIM28,CDC42,HGS,ZBTB16,HSP90AA1,THRA,HSPA5,HSPA1A,YWHAH,BCL2,XPO1,FN1,ARRB2,NEDD4,SQSTM1,DDB…
GO:MF	ubiquitin protein ligase binding	GO:0031625	6.72E-36	35.17235539	291	617	69	18098	UBE2D3,TRIB1,NEK6,UBA52,UBC,TP53,YWHAZ,SRC,TRAF6,EGFR,SMAD3,JUN,SMAD2,BRCA1,IKBKG,IKBKE,MDM2,UBE2D2,RB1,RELA,PRKACA,UBB,RPS27A,PML,HSPA8,YWHAE,NFKBIA,GSK3B,SUMO1,LYN,TUBB,SUMO2,POLR2A,DAXX,CDKN1A,HIF1A,XRCC5,STUB1,CASP8,TRIM28,APC,ACTG1,HSP90AA1,HSPA5,HSPA1A,MYOD1,BCL2,JAK1,ARRB1,ARRB2,SQSTM1,TNFRSF1B,PARK2,PTK2B,VCP,HDAC6,USP7,TSG101,GABARAPL2,PSMA3,RPA2,TCP1,CUL4A,PPARGC1A,AXIN1,TNFRSF14,PCBP2,…
GO:MF	protein binding	GO:0005515	2.30E-35	34.63872243	12715	617	563	18098	MRFAP1L1,RNF220,RORC,SNRPF,ACTR1B,PARVG,CLNS1A,ACTR6,TMEM219,TRAM1,TPCN1,CLTA,CMTM8,TMEM14C,SAMM50,PSRC1,LRRC8A,ENOPH1,NFE2,CCNDBP1,GMDS,SEPHS1,AIMP2,UBE2D3,COL2A1,DNAH2,MT1G,HFE2,PTPN6,STK38,ANKRD1,ATP6AP2,COMP,NR1H2,RUFY4,PPIAL4G,CSDA,IGFL3,ODF4,CEP250,NPHP1,MYH6,PMP22,EFNB1,DUX4,MEPE,ATP6V1B2,SIGLEC10,FMNL3,PHIP,RAB8A,FHL2,NIPBL,EXOSC1,NBL1,PPFIA1,SIRT2,PRKCD,TSLP,S100P,NR4A1,BAG3,WDR72,RYR1,S…
GO:MF	heterocyclic compound binding	GO:1901363	1.54E-31	30.81217942	6279	617	360	18098	RORC,SNRPF,ACTR1B,CLNS1A,NFE2,GMDS,SEPHS1,GK5,UBE2D3,DNAH2,STK38,ANKRD1,NR1H2,CSDA,MYH6,PFKFB4,DUX4,ATP6V1B2,RAB8A,EXOSC1,SIRT2,PRKCD,NR4A1,BAG3,RYR1,SNRPN,TRIB1,MRPL14,PSMC2,CD320,ZMYM6,MYOCD,TXN,TUBB2B,MIR99A,MEN1,RPUSD1,MRPS11,IFI44L,SPAG7,S100A4,ACACA,RFC4,GCAT,TOP2A,MRPS30,BHLHB3,ZNF93,ZNF135,SLC3A2,POP5,RXRA,MYH11,NEK6,FOLR1,RPS6KA2,RAB1B,AATF,HBG1,FLNB,GTF2E2,ASNS,IRF5,EPAS1,ZNF260,VEZF1,R…
GO:MF	signaling receptor binding	GO:0005102	1.80E-31	30.74425222	1625	617	156	18098	CMTM8,COL2A1,HFE2,COMP,NR1H2,IGFL3,EFNB1,PHIP,FHL2,NBL1,TSLP,S100P,NR4A1,IL17B,PLXNB1,CD320,CD8B,HFE,S100A4,TGFB3,RXRA,SAA2,C9ORF47,TACC1,FGG,WNT7A,VEGFA,TP53,ESR1,GRB2,SRC,EP300,TRAF6,AR,EGFR,SMAD3,SMAD2,BRCA1,IKBKG,YWHAG,CTNNB1,PIK3R1,FYN,MDM2,ABL1,RB1,PRKCA,STAT3,RARA,PCNA,PTPN11,NCOR1,PLCG1,LCK,CBL,SHC1,PARP1,SMARCA4,TGFBR1,HSPA8,PPP2CA,NCOR2,STAT1,TBP,CRK,NCOA1,NCOA3,PPARG,CEBPB,SUMO1,LYN,TU…
GO:MF	hormone receptor binding	GO:0051427	2.48E-31	30.60601177	187	617	53	18098	FHL2,NR4A1,RXRA,TACC1,ESR1,SRC,EP300,SMAD3,BRCA1,CTNNB1,FYN,RB1,STAT3,PCNA,PTPN11,NCOR1,PARP1,SMARCA4,NCOR2,STAT1,NCOA1,NCOA3,PPARG,CEBPB,SUMO1,JAK2,DAXX,HIF1A,SIRT1,NCOA6,VDR,HTATIP,PSMC5,MYOD1,YWHAH,JAK1,ARRB1,PRKCB,NCOA2,NRIP1,GH1,GTF2B,NR0B2,STAT5B,STRN,PHB2,JUND,SMARCE1,PPARGC1A,FUS,TAF1,CDK7,HMGA1
GO:MF	organic cyclic compound binding	GO:0097159	4.95E-31	30.30544722	6365	617	362	18098	RORC,SNRPF,ACTR1B,CLNS1A,SERPINA6,NFE2,GMDS,SEPHS1,GK5,UBE2D3,DNAH2,STK38,ANKRD1,NR1H2,CSDA,MYH6,PFKFB4,DUX4,ATP6V1B2,RAB8A,EXOSC1,SIRT2,PRKCD,NR4A1,BAG3,RYR1,SNRPN,TRIB1,MRPL14,PSMC2,CD320,ZMYM6,MYOCD,TXN,TUBB2B,MIR99A,MEN1,RPUSD1,MRPS11,IFI44L,SPAG7,S100A4,ACACA,RFC4,GCAT,TOP2A,MRPS30,BHLHB3,ZNF93,ZNF135,SLC3A2,POP5,RXRA,MYH11,NEK6,FOLR1,RPS6KA2,RAB1B,AATF,HBG1,FLNB,GTF2E2,ASNS,IRF5,EPAS1,ZNF26…
GO:MF	transcription regulatory region DNA binding	GO:0044212	1.92E-30	29.71660556	965	617	115	18098	RORC,NFE2,NR1H2,CSDA,DUX4,NR4A1,MYOCD,MEN1,BHLHB3,ZNF93,RXRA,IRF5,VEZF1,H2AFZ,RUNX2,FOS,RUNX1,SOX11,TP53,ESR1,EP300,CREBBP,HDAC1,MYC,AR,SMAD3,JUN,SMAD2,BRCA1,NR3C1,RB1,ACTB,RELA,SP1,HDAC2,SMAD4,NFKB1,STAT3,RARA,NCOR1,SIN3A,PARP1,SMARCA4,NCOR2,NPM1,STAT1,TBP,NCOA1,RUVBL2,PPARG,CEBPB,SMAD1,HDAC4,POLR2A,HIF1A,SIRT1,XRCC5,RBBP4,VDR,DHX9,CDK9,ESR2,THRB,NFKB2,ZBTB16,CREB1,THRA,E2F1,HDAC5,MYOD1,ARRB1,CE…
GO:MF	regulatory region nucleic acid binding	GO:0001067	2.12E-30	29.67432174	966	617	115	18098	RORC,NFE2,NR1H2,CSDA,DUX4,NR4A1,MYOCD,MEN1,BHLHB3,ZNF93,RXRA,IRF5,VEZF1,H2AFZ,RUNX2,FOS,RUNX1,SOX11,TP53,ESR1,EP300,CREBBP,HDAC1,MYC,AR,SMAD3,JUN,SMAD2,BRCA1,NR3C1,RB1,ACTB,RELA,SP1,HDAC2,SMAD4,NFKB1,STAT3,RARA,NCOR1,SIN3A,PARP1,SMARCA4,NCOR2,NPM1,STAT1,TBP,NCOA1,RUVBL2,PPARG,CEBPB,SMAD1,HDAC4,POLR2A,HIF1A,SIRT1,XRCC5,RBBP4,VDR,DHX9,CDK9,ESR2,THRB,NFKB2,ZBTB16,CREB1,THRA,E2F1,HDAC5,MYOD1,ARRB1,CE…
GO:MF	nuclear hormone receptor binding	GO:0035257	3.37E-29	28.47282032	154	617	47	18098	FHL2,NR4A1,RXRA,TACC1,ESR1,SRC,EP300,SMAD3,BRCA1,CTNNB1,RB1,STAT3,PCNA,NCOR1,PARP1,SMARCA4,NCOR2,STAT1,NCOA1,NCOA3,PPARG,CEBPB,SUMO1,DAXX,HIF1A,SIRT1,NCOA6,VDR,HTATIP,MYOD1,YWHAH,ARRB1,PRKCB,NCOA2,NRIP1,GTF2B,NR0B2,STAT5B,STRN,PHB2,JUND,SMARCE1,PPARGC1A,FUS,TAF1,CDK7,HMGA1
GO:MF	protein-containing complex binding	GO:0044877	4.98E-29	28.30259498	1128	617	123	18098	ACTR6,CLTA,COMP,CSDA,MYH6,PHIP,NIPBL,BAG3,ESPN,MYOM1,MYH11,C9ORF47,GTF2E2,XIRP2,H2AFZ,MYH7,TPR,TNNC2,TP53,SRC,HDAC1,MYC,EGFR,SMAD3,PIK3R1,FYN,MDM2,ABL1,PRKCA,ACTB,RELA,HDAC2,SMAD4,PCNA,PTPN11,LCK,SHC1,YWHAB,SIN3A,SMARCA4,TGFBR1,HSPA8,YWHAE,NCOR2,NPM1,NCOA1,RUVBL2,LYN,VIM,TUBB,FLNA,GC20,SYK,CDKN1A,PLK1,SIRT1,XRCC5,RBBP4,IRS1,DHX9,SMURF1,ATM,CASP8,PAK1,APC,TERF2,CAV1,HSP90AA1,THRA,HSPA5,CDK4,PPP1CA…
GO:MF	double-stranded DNA binding	GO:0003690	6.91E-29	28.16036974	987	617	114	18098	RORC,NFE2,NR1H2,CSDA,DUX4,NR4A1,MYOCD,MEN1,BHLHB3,ZNF93,RXRA,VEZF1,H2AFZ,RUNX2,FOS,RUNX1,SOX11,TP53,ESR1,EP300,CREBBP,HDAC1,MYC,AR,EGFR,SMAD3,JUN,SMAD2,MAPK1,ABL1,NR3C1,RB1,ACTB,RELA,SP1,HDAC2,SMAD4,NFKB1,STAT3,RARA,PCNA,PRKDC,SIN3A,PARP1,SMARCA4,STAT1,TBP,RUVBL2,PPARG,MCM7,CEBPB,SMAD1,HDAC4,HIF1A,SIRT1,XRCC5,RBBP4,VDR,MCM3,DHX9,TERF1,CDK9,ESR2,THRB,NFKB2,ZBTB16,CREB1,TERF2,THRA,E2F1,HDAC5,MYOD1,…
GO:MF	chromatin binding	GO:0003682	1.36E-28	27.86690334	545	617	83	18098	ACTR6,NIPBL,SIRT2,MEN1,TOP2A,RXRA,H2AFZ,RUNX2,FOS,DHX30,TPR,TP53,ESR1,EP300,CREBBP,HDAC1,AR,EGFR,SMAD3,JUN,SMAD2,CTNNB1,ACTB,RELA,HDAC2,SMAD4,NFKB1,STAT3,RARA,PCNA,NCOR1,SIN3A,HDAC3,SMARCA4,NCOR2,NPM1,STAT1,NCOA1,RUVBL2,PPARG,CEBPB,HDAC4,POLR2A,CDK1,NCOA6,RBBP4,DHX9,CDK9,THRB,TRIM28,NFKB2,THRA,HDAC5,MYOD1,CEBPA,PRKCB,MLH1,NCOA2,AIRE,SMARCC1,RBL1,ATF2,SMC1L1,SRF,SETDB1,GTF2B,STAT5B,CHAF1A,SKIL,NOT…
GO:MF	transcription coregulator activity	GO:0003712	1.44E-28	27.84028082	585	617	86	18098	LPIN2,NFE2,ANKRD1,NR1H2,CSDA,FHL2,MYOCD,BHLHB3,RXRA,SOX11,MAGED1,RALY,EP300,CREBBP,HDAC1,SMAD3,JUN,BRCA1,CTNNB1,ABL1,RB1,SP1,SMAD4,RARA,NCOR1,SIN3A,HDAC3,PML,SMARCA4,NCOR2,NPM1,NCOA1,NCOA3,RUVBL2,PPARG,HDAC4,DAXX,SIRT1,NCOA6,VDR,DHX9,HTATIP,ESR2,THRB,TRIM28,NFKB2,CREB1,THRA,COPS5,HSPA1A,MYOD1,CEBPA,CCND1,PRKCB,NCOA2,TLE1,ATN1,YY1,SMARCC1,NFKBIB,NRIP1,NR0B2,SKIL,ACTN1,TSG101,HMGB1,TAF9,KAT2B,TCF3,…
GO:MF	transcription coactivator activity	GO:0003713	8.02E-28	27.09574313	339	617	65	18098	LPIN2,NFE2,ANKRD1,NR1H2,FHL2,MYOCD,RXRA,SOX11,MAGED1,EP300,CREBBP,JUN,BRCA1,CTNNB1,ABL1,RB1,SP1,RARA,PML,SMARCA4,NPM1,NCOA1,NCOA3,PPARG,DAXX,NCOA6,VDR,DHX9,HTATIP,ESR2,THRB,TRIM28,NFKB2,THRA,COPS5,MYOD1,CEBPA,PRKCB,NCOA2,YY1,SMARCC1,NFKBIB,NRIP1,ACTN1,TSG101,HMGB1,TAF9,KAT2B,TCF3,MAX,RXRB,GTF2F1,SMARCB1,PPARA,JUND,SMARCE1,PPARGC1A,CARM1,FUS,TAF1,DDX17,BRD7,CDK7,HMGA1,NR1H3
GO:MF	nuclear receptor binding	GO:0016922	8.17E-28	27.08775323	111	617	40	18098	FHL2,NR4A1,RXRA,TACC1,ESR1,SRC,EP300,SMAD3,BRCA1,CTNNB1,RB1,STAT3,PCNA,PARP1,SMARCA4,NCOR2,NCOA1,NCOA3,PPARG,CEBPB,SUMO1,DAXX,NCOA6,VDR,HTATIP,YWHAH,ARRB1,PRKCB,NCOA2,NRIP1,NR0B2,STAT5B,STRN,PHB2,JUND,SMARCE1,PPARGC1A,FUS,CDK7,HMGA1
GO:MF	histone deacetylase binding	GO:0042826	1.85E-27	26.73368744	113	617	40	18098	ANKRD1,NIPBL,SIRT2,MYOCD,TOP2A,BHLHB3,TP53,TRAF6,HDAC1,RELA,SP1,HDAC2,RARA,NCOR1,YWHAB,HDAC3,PARP1,YWHAE,NCOR2,CEBPB,HDAC4,HIF1A,RBBP4,MAPK8,HSP90AA1,HDAC5,HSPA1A,CCND1,PARK2,KPNA2,NRIP1,HDAC6,SRF,DDX20,SFPQ,KAT2B,CHD4,TAL1,CBX5,PHB
GO:MF	sequence-specific double-stranded DNA binding	GO:1990837	1.25E-25	24.90180812	895	617	103	18098	RORC,NFE2,NR1H2,CSDA,DUX4,NR4A1,MYOCD,BHLHB3,ZNF93,RXRA,VEZF1,H2AFZ,RUNX2,FOS,RUNX1,SOX11,TP53,ESR1,EP300,CREBBP,HDAC1,MYC,AR,SMAD3,JUN,SMAD2,ABL1,NR3C1,RB1,ACTB,RELA,SP1,HDAC2,SMAD4,NFKB1,STAT3,RARA,SIN3A,PARP1,SMARCA4,STAT1,TBP,RUVBL2,PPARG,MCM7,CEBPB,SMAD1,HDAC4,HIF1A,SIRT1,RBBP4,VDR,MCM3,DHX9,CDK9,ESR2,THRB,NFKB2,ZBTB16,CREB1,THRA,E2F1,HDAC5,MYOD1,CEBPA,MCM2,STAT5A,ETS1,NCOA2,AIRE,PARK2,YY1,C…
GO:MF	sequence-specific DNA binding	GO:0043565	1.25E-24	23.90370312	1203	617	120	18098	RORC,NFE2,NR1H2,CSDA,DUX4,NR4A1,MYOCD,BHLHB3,ZNF93,RXRA,IRF5,EPAS1,VEZF1,H2AFZ,RUNX2,FOS,RUNX1,SOX11,TP53,ESR1,EP300,CREBBP,HDAC1,MYC,AR,SMAD3,JUN,SMAD2,ABL1,NR3C1,RB1,ACTB,RELA,SP1,HDAC2,SMAD4,NFKB1,STAT3,RARA,NCOR1,SIN3A,PARP1,SMARCA4,NCOR2,STAT1,TBP,RUVBL2,PPARG,MCM7,CEBPB,SMAD1,HDAC4,HIF1A,SIRT1,XRCC5,RBBP4,VDR,MCM3,DHX9,TERF1,CDK9,ESR2,THRB,TRIM28,NFKB2,ZBTB16,CREB1,TERF2,THRA,E2F1,HDAC5,MYO…
GO:MF	identical protein binding	GO:0042802	2.05E-24	23.68797976	1758	617	150	18098	MRFAP1L1,TPCN1,LRRC8A,GMDS,SEPHS1,COL2A1,FHL2,NBL1,S100P,NR4A1,MYOM1,ADIPOR2,S100A4,ACACA,TOP2A,BHLHB3,TGFB3,RXRA,CLDN5,FLNB,ASNS,IRF5,FNBP1,FGG,ATP2A1,RAF1,MAGED1,TPR,KIF1A,VEGFA,TP53,YWHAZ,ESR1,GRB2,TRAF6,EGFR,SMAD3,JUN,SMAD2,BRCA1,IKBKG,CSNK2A1,YWHAG,MAPK1,FYN,MDM2,AKT1,RB1,ACTB,RELA,SP1,SMAD4,NFKB1,STAT3,PCNA,MAPK3,LCK,YWHAQ,YWHAB,PARP1,PML,YWHAE,NPM1,STAT1,NFKBIA,RUVBL2,PPARG,CEBPB,SMAD1,IKB…
GO:MF	proximal promoter sequence-specific DNA binding	GO:0000987	2.40E-24	23.61952785	555	617	78	18098	RORC,NFE2,NR1H2,DUX4,NR4A1,MYOCD,BHLHB3,RXRA,H2AFZ,RUNX2,FOS,RUNX1,SOX11,TP53,ESR1,EP300,CREBBP,HDAC1,MYC,AR,SMAD3,JUN,SMAD2,NR3C1,RB1,ACTB,RELA,SP1,HDAC2,SMAD4,STAT3,RARA,SMARCA4,STAT1,TBP,PPARG,CEBPB,SMAD1,HDAC4,HIF1A,RBBP4,VDR,DHX9,CDK9,ESR2,NFKB2,CREB1,E2F1,HDAC5,MYOD1,CEBPA,STAT5A,ETS1,NCOA2,YY1,SMARCC1,NRIP1,ATF2,HDAC6,SRF,STAT5B,SKIL,MYB,NOTCH1,SFPQ,POU2F1,CHD4,TCF3,MAX,TAL1,RXRB,ATF4,SMAR…
GO:MF	ATP binding	GO:0005524	2.48E-24	23.60468803	1498	617	136	18098	ACTR1B,SEPHS1,GK5,UBE2D3,DNAH2,STK38,MYH6,PFKFB4,ATP6V1B2,PRKCD,RYR1,TRIB1,PSMC2,ACACA,RFC4,TOP2A,MYH11,NEK6,RPS6KA2,ASNS,PIP5K1C,RUNX2,MYH7,RUNX1,ATP2A1,RAF1,SGK1,UBA1,ACTA1,DDX18,DHX30,CKM,KIF1A,TP53,SRC,EGFR,CSNK2A1,MAPK1,IKBKE,FYN,ABL1,AKT1,UBE2D2,PRKCA,ACTB,UBE2I,PRKACA,MAPK3,PRKDC,LCK,SMARCA4,TGFBR1,HSPA8,RUVBL2,GSK3B,MCM7,LYN,IKBKB,MAPK14,JAK2,CDK1,SYK,HSPA4,ERBB2,PRKCZ,PLK1,XRCC5,MAP3K14,…
GO:MF	protein kinase activity	GO:0004672	2.83E-24	23.54847997	612	617	82	18098	HFE2,STK38,PRKCD,TRIB1,NEK6,RPS6KA2,RAF1,SGK1,SRC,EGFR,CSNK2A1,MAPK1,IKBKE,FYN,ABL1,AKT1,PRKCA,PRKACA,MAPK3,PRKDC,LCK,TGFBR1,GSK3B,LYN,IKBKB,MAPK14,JAK2,CDK1,SYK,ERBB2,CDKN1A,PRKCZ,PLK1,PRKAB1,MAP3K14,CSNK2A2,CHUK,CDK9,ATM,MAPK8,TRIM28,PAK1,CDK4,JAK1,CCND1,SQSTM1,PRKCB,ATR,BCR,INSR,PTK2B,CHEK1,PAK2,TBK1,PRKCE,TNIK,RPS6KB1,ILK,MAP3K5,BTK,IGF1R,PDGFRB,PDPK1,CSK,MAP2K1,ZAP70,MAP3K7,STK24,KIT,CDK5,TG…
GO:MF	drug binding	GO:0008144	5.13E-24	23.29022682	1754	617	149	18098	ACTR1B,SEPHS1,GK5,UBE2D3,DNAH2,STK38,PPIAL4G,MYH6,PFKFB4,ATP6V1B2,PRKCD,RYR1,TRIB1,PSMC2,CD320,ACACA,RFC4,GCAT,TOP2A,MT2A,MYH11,NEK6,FOLR1,CHRNA4,RPS6KA2,HBG1,ASNS,MB,PIP5K1C,RUNX2,MYH7,RUNX1,ATP2A1,RAF1,SGK1,UBA1,ACTA1,DDX18,DHX30,CKM,KIF1A,ALAS2,TP53,SRC,EGFR,CSNK2A1,MAPK1,IKBKE,FYN,ABL1,AKT1,UBE2D2,PRKCA,ACTB,UBE2I,PRKACA,RARA,MAPK3,PRKDC,LCK,SMARCA4,TGFBR1,HSPA8,RUVBL2,GSK3B,PPARG,MCM7,LYN,IK…
GO:MF	transcription regulatory region sequence-specific DNA binding	GO:0000976	4.32E-23	22.36434906	849	617	96	18098	RORC,NFE2,NR1H2,CSDA,DUX4,NR4A1,MYOCD,BHLHB3,ZNF93,RXRA,VEZF1,H2AFZ,RUNX2,FOS,RUNX1,SOX11,TP53,ESR1,EP300,CREBBP,HDAC1,MYC,AR,SMAD3,JUN,SMAD2,NR3C1,RB1,ACTB,RELA,SP1,HDAC2,SMAD4,NFKB1,STAT3,RARA,SIN3A,PARP1,SMARCA4,STAT1,TBP,RUVBL2,PPARG,CEBPB,SMAD1,HDAC4,HIF1A,SIRT1,RBBP4,VDR,DHX9,CDK9,ESR2,THRB,NFKB2,ZBTB16,CREB1,THRA,E2F1,HDAC5,MYOD1,CEBPA,STAT5A,ETS1,NCOA2,AIRE,PARK2,YY1,CDC5L,SMARCC1,NRIP1,A…
GO:MF	adenyl nucleotide binding	GO:0030554	6.32E-23	22.19957367	1567	617	137	18098	ACTR1B,SEPHS1,GK5,UBE2D3,DNAH2,STK38,MYH6,PFKFB4,ATP6V1B2,PRKCD,BAG3,RYR1,TRIB1,PSMC2,ACACA,RFC4,TOP2A,MYH11,NEK6,RPS6KA2,ASNS,PIP5K1C,RUNX2,MYH7,RUNX1,ATP2A1,RAF1,SGK1,UBA1,ACTA1,DDX18,DHX30,CKM,KIF1A,TP53,SRC,EGFR,CSNK2A1,MAPK1,IKBKE,FYN,ABL1,AKT1,UBE2D2,PRKCA,ACTB,UBE2I,PRKACA,MAPK3,PRKDC,LCK,SMARCA4,TGFBR1,HSPA8,RUVBL2,GSK3B,MCM7,LYN,IKBKB,MAPK14,JAK2,CDK1,SYK,HSPA4,ERBB2,PRKCZ,PLK1,XRCC5,MAP…
GO:MF	adenyl ribonucleotide binding	GO:0032559	1.03E-22	21.98897529	1556	617	136	18098	ACTR1B,SEPHS1,GK5,UBE2D3,DNAH2,STK38,MYH6,PFKFB4,ATP6V1B2,PRKCD,RYR1,TRIB1,PSMC2,ACACA,RFC4,TOP2A,MYH11,NEK6,RPS6KA2,ASNS,PIP5K1C,RUNX2,MYH7,RUNX1,ATP2A1,RAF1,SGK1,UBA1,ACTA1,DDX18,DHX30,CKM,KIF1A,TP53,SRC,EGFR,CSNK2A1,MAPK1,IKBKE,FYN,ABL1,AKT1,UBE2D2,PRKCA,ACTB,UBE2I,PRKACA,MAPK3,PRKDC,LCK,SMARCA4,TGFBR1,HSPA8,RUVBL2,GSK3B,MCM7,LYN,IKBKB,MAPK14,JAK2,CDK1,SYK,HSPA4,ERBB2,PRKCZ,PLK1,XRCC5,MAP3K14,…
GO:MF	steroid hormone receptor binding	GO:0035258	2.02E-22	21.69376277	93	617	33	18098	FHL2,NR4A1,TACC1,ESR1,SRC,EP300,SMAD3,BRCA1,CTNNB1,RB1,STAT3,PCNA,PARP1,SMARCA4,NCOR2,NCOA1,NCOA3,PPARG,CEBPB,SUMO1,DAXX,NCOA6,HTATIP,YWHAH,ARRB1,PRKCB,NRIP1,STAT5B,STRN,PHB2,PPARGC1A,FUS,CDK7
GO:MF	RNA polymerase II regulatory region DNA binding	GO:0001012	2.39E-22	21.62161372	805	617	92	18098	RORC,NR1H2,CSDA,DUX4,NR4A1,MYOCD,BHLHB3,RXRA,VEZF1,H2AFZ,RUNX2,FOS,RUNX1,SOX11,TP53,ESR1,EP300,HDAC1,MYC,AR,SMAD3,JUN,SMAD2,NR3C1,RB1,ACTB,RELA,SP1,HDAC2,SMAD4,NFKB1,STAT3,RARA,NCOR1,PARP1,SMARCA4,NCOR2,STAT1,TBP,NCOA1,RUVBL2,PPARG,CEBPB,SMAD1,HDAC4,HIF1A,SIRT1,RBBP4,VDR,DHX9,CDK9,ESR2,THRB,NFKB2,ZBTB16,CREB1,THRA,HDAC5,MYOD1,CEBPA,STAT5A,ETS1,NCOA2,AIRE,YY1,CDC5L,SMARCC1,RBL1,NRIP1,ATF2,HDAC6,SR…
GO:MF	RNA polymerase II proximal promoter sequence-specific DNA binding	GO:0000978	3.11E-22	21.50679306	541	617	74	18098	RORC,NR1H2,DUX4,NR4A1,MYOCD,BHLHB3,RXRA,H2AFZ,RUNX2,FOS,RUNX1,SOX11,TP53,ESR1,EP300,HDAC1,MYC,AR,SMAD3,JUN,SMAD2,NR3C1,ACTB,RELA,SP1,HDAC2,SMAD4,STAT3,RARA,SMARCA4,STAT1,TBP,PPARG,CEBPB,SMAD1,HDAC4,HIF1A,RBBP4,VDR,DHX9,CDK9,ESR2,NFKB2,CREB1,HDAC5,MYOD1,CEBPA,STAT5A,ETS1,NCOA2,YY1,SMARCC1,NRIP1,ATF2,HDAC6,SRF,STAT5B,SKIL,MYB,NOTCH1,SFPQ,POU2F1,CHD4,TCF3,MAX,TAL1,RXRB,ATF4,SMARCB1,PPARA,JUND,SMARCE…
GO:MF	purine ribonucleoside triphosphate binding	GO:0035639	9.70E-22	21.01342349	1845	617	149	18098	ACTR1B,SEPHS1,GK5,UBE2D3,DNAH2,STK38,MYH6,PFKFB4,ATP6V1B2,RAB8A,PRKCD,RYR1,TRIB1,PSMC2,TUBB2B,IFI44L,ACACA,RFC4,TOP2A,MYH11,NEK6,RPS6KA2,RAB1B,ASNS,PIP5K1C,RUNX2,MYH7,RUNX1,ATP2A1,RAF1,SGK1,UBA1,ACTA1,DDX18,DHX30,CKM,KIF1A,TP53,SRC,EGFR,CSNK2A1,MAPK1,IKBKE,FYN,ABL1,AKT1,UBE2D2,PRKCA,ACTB,UBE2I,PRKACA,MAPK3,PRKDC,LCK,SMARCA4,TGFBR1,HSPA8,RUVBL2,GSK3B,MCM7,EEF1A1,LYN,IKBKB,TUBB,MAPK14,JAK2,CDK1,SYK…
GO:MF	kinase activity	GO:0016301	1.20E-21	20.92214746	823	617	92	18098	SEPHS1,GK5,HFE2,STK38,PFKFB4,PRKCD,TRIB1,NEK6,RPS6KA2,PIP5K1C,RAF1,SGK1,CDKN2A,CKM,CDK2AP2,YWHAZ,SRC,EGFR,CSNK2A1,MAPK1,IKBKE,FYN,ABL1,AKT1,PRKCA,PRKACA,MAPK3,PRKDC,LCK,TGFBR1,GSK3B,LYN,IKBKB,MAPK14,JAK2,CDK1,SYK,ERBB2,CDKN1A,PRKCZ,PLK1,PRKAB1,MAP3K14,CSNK2A2,CHUK,CDK9,ATM,MAPK8,TRIM28,PAK1,HGS,CDK4,JAK1,CCND1,SQSTM1,PRKCB,ATR,BCR,INSR,PTK2B,CHEK1,PAK2,TBK1,PRKCE,TNIK,RPS6KB1,ILK,MAP3K5,BTK,IGF1R…
GO:MF	phosphotransferase activity, alcohol group as acceptor	GO:0016773	1.31E-21	20.88425937	715	617	85	18098	GK5,HFE2,STK38,PFKFB4,PRKCD,TRIB1,NEK6,RPS6KA2,PIP5K1C,RAF1,SGK1,SRC,EGFR,CSNK2A1,MAPK1,IKBKE,FYN,ABL1,AKT1,PRKCA,PRKACA,MAPK3,PRKDC,LCK,TGFBR1,GSK3B,LYN,IKBKB,MAPK14,JAK2,CDK1,SYK,ERBB2,CDKN1A,PRKCZ,PLK1,PRKAB1,MAP3K14,CSNK2A2,CHUK,CDK9,ATM,MAPK8,TRIM28,PAK1,CDK4,JAK1,CCND1,SQSTM1,PRKCB,ATR,BCR,INSR,PTK2B,CHEK1,PAK2,TBK1,PRKCE,TNIK,RPS6KB1,ILK,MAP3K5,BTK,IGF1R,PDGFRB,PDPK1,CSK,MAP2K1,ZAP70,MAP3K…
GO:MF	protein C-terminus binding	GO:0008022	6.21E-20	19.20719582	189	617	42	18098	CEP250,NIPBL,HSPB7,TOP2A,SRC,EP300,CTNNB1,ABL1,SP1,LCK,YWHAQ,YWHAB,PPP2CA,PPARG,SUMO1,POLR2A,JAK2,ERBB2,EPB41,SIRT1,XRCC5,ZBTB16,TERF2,ATXN1,FN1,NCL,PTK2B,XRCC6,PPP2CB,USP7,CSK,PHB2,MAP2K1,PABPC1,DLG4,MAPRE1,SIAH1,ATF4,HRAS,PHB,DAB2,CDK7
GO:MF	purine nucleotide binding	GO:0017076	6.26E-20	19.20374194	1923	617	149	18098	ACTR1B,SEPHS1,GK5,UBE2D3,DNAH2,STK38,MYH6,PFKFB4,ATP6V1B2,RAB8A,PRKCD,BAG3,RYR1,TRIB1,PSMC2,TUBB2B,IFI44L,ACACA,RFC4,TOP2A,MYH11,NEK6,RPS6KA2,RAB1B,ASNS,PIP5K1C,RUNX2,MYH7,RUNX1,ATP2A1,RAF1,SGK1,UBA1,ACTA1,DDX18,DHX30,CKM,KIF1A,TP53,SRC,EGFR,CSNK2A1,MAPK1,IKBKE,FYN,ABL1,AKT1,UBE2D2,PRKCA,ACTB,UBE2I,PRKACA,MAPK3,PRKDC,LCK,SMARCA4,TGFBR1,HSPA8,RUVBL2,GSK3B,MCM7,EEF1A1,LYN,IKBKB,TUBB,MAPK14,JAK2,CDK…
GO:MF	purine ribonucleotide binding	GO:0032555	9.08E-20	19.04211993	1910	617	148	18098	ACTR1B,SEPHS1,GK5,UBE2D3,DNAH2,STK38,MYH6,PFKFB4,ATP6V1B2,RAB8A,PRKCD,RYR1,TRIB1,PSMC2,TUBB2B,IFI44L,ACACA,RFC4,TOP2A,MYH11,NEK6,RPS6KA2,RAB1B,ASNS,PIP5K1C,RUNX2,MYH7,RUNX1,ATP2A1,RAF1,SGK1,UBA1,ACTA1,DDX18,DHX30,CKM,KIF1A,TP53,SRC,EGFR,CSNK2A1,MAPK1,IKBKE,FYN,ABL1,AKT1,UBE2D2,PRKCA,ACTB,UBE2I,PRKACA,MAPK3,PRKDC,LCK,SMARCA4,TGFBR1,HSPA8,RUVBL2,GSK3B,MCM7,EEF1A1,LYN,IKBKB,TUBB,MAPK14,JAK2,CDK1,SYK…
GO:MF	RNA polymerase II regulatory region sequence-specific DNA binding	GO:0000977	1.37E-19	18.86201529	798	617	87	18098	RORC,NR1H2,CSDA,DUX4,NR4A1,MYOCD,BHLHB3,RXRA,VEZF1,H2AFZ,RUNX2,FOS,RUNX1,SOX11,TP53,ESR1,EP300,HDAC1,MYC,AR,SMAD3,JUN,SMAD2,NR3C1,ACTB,RELA,SP1,HDAC2,SMAD4,NFKB1,STAT3,RARA,PARP1,SMARCA4,STAT1,TBP,RUVBL2,PPARG,CEBPB,SMAD1,HDAC4,HIF1A,SIRT1,RBBP4,VDR,DHX9,CDK9,ESR2,THRB,NFKB2,ZBTB16,CREB1,THRA,HDAC5,MYOD1,CEBPA,STAT5A,ETS1,NCOA2,AIRE,YY1,CDC5L,SMARCC1,NRIP1,ATF2,HDAC6,SRF,GTF2B,STAT5B,SKIL,MYB,NOT…
GO:MF	ribonucleotide binding	GO:0032553	2.06E-19	18.68628758	1926	617	148	18098	ACTR1B,SEPHS1,GK5,UBE2D3,DNAH2,STK38,MYH6,PFKFB4,ATP6V1B2,RAB8A,PRKCD,RYR1,TRIB1,PSMC2,TUBB2B,IFI44L,ACACA,RFC4,TOP2A,MYH11,NEK6,RPS6KA2,RAB1B,ASNS,PIP5K1C,RUNX2,MYH7,RUNX1,ATP2A1,RAF1,SGK1,UBA1,ACTA1,DDX18,DHX30,CKM,KIF1A,TP53,SRC,EGFR,CSNK2A1,MAPK1,IKBKE,FYN,ABL1,AKT1,UBE2D2,PRKCA,ACTB,UBE2I,PRKACA,MAPK3,PRKDC,LCK,SMARCA4,TGFBR1,HSPA8,RUVBL2,GSK3B,MCM7,EEF1A1,LYN,IKBKB,TUBB,MAPK14,JAK2,CDK1,SYK…
GO:MF	DNA binding	GO:0003677	9.86E-19	18.00591477	2528	617	175	18098	RORC,NFE2,ANKRD1,NR1H2,CSDA,DUX4,NR4A1,ZMYM6,MYOCD,MEN1,RFC4,TOP2A,BHLHB3,ZNF93,ZNF135,RXRA,GTF2E2,IRF5,EPAS1,ZNF260,VEZF1,H2AFZ,RUNX2,FOS,RUNX1,SOX11,CDKN2A,ZNF213,ZNF532,TP53,ESR1,EP300,CREBBP,HDAC1,MYC,AR,EGFR,SMAD3,JUN,SMAD2,BRCA1,MAPK1,ABL1,NR3C1,RB1,ACTB,RELA,SP1,HDAC2,SMAD4,NFKB1,STAT3,RARA,PCNA,PRKDC,NCOR1,SIN3A,PARP1,PML,SMARCA4,H2AFX,NCOR2,NPM1,STAT1,TBP,NCOA1,RUVBL2,PPARG,MCM7,CEBPB,SM…
GO:MF	transcription regulator activity	GO:0140110	1.20E-18	17.91905267	1739	617	137	18098	RORC,LPIN2,NFE2,ANKRD1,NR1H2,CSDA,DUX4,FHL2,NR4A1,ZMYM6,MYOCD,BHLHB3,ZNF93,ZNF135,RXRA,GTF2E2,IRF5,EPAS1,VEZF1,RUNX2,FOS,RUNX1,SOX11,MAGED1,ZNF213,RALY,TP53,ESR1,EP300,CREBBP,HDAC1,MYC,AR,SMAD3,JUN,SMAD2,BRCA1,CTNNB1,ABL1,NR3C1,RB1,RELA,SP1,SMAD4,NFKB1,STAT3,RARA,NCOR1,SIN3A,HDAC3,PARP1,PML,SMARCA4,NCOR2,NPM1,STAT1,TBP,NCOA1,NCOA3,RUVBL2,PPARG,CEBPB,SMAD1,HDAC4,DAXX,HIF1A,SIRT1,NCOA6,VDR,DHX9,HTA…
GO:MF	transferase activity, transferring phosphorus-containing groups	GO:0016772	5.46E-18	17.263101	979	617	95	18098	SEPHS1,GK5,HFE2,STK38,PFKFB4,PRKCD,TRIB1,NEK6,RPS6KA2,PIP5K1C,RAF1,SGK1,CDKN2A,CKM,CDK2AP2,YWHAZ,SRC,EGFR,CSNK2A1,MAPK1,IKBKE,FYN,ABL1,AKT1,PRKCA,PRKACA,MAPK3,PRKDC,LCK,TGFBR1,GSK3B,LYN,IKBKB,POLR2A,MAPK14,JAK2,CDK1,SYK,ERBB2,CDKN1A,PRKCZ,PLK1,PRKAB1,MAP3K14,CSNK2A2,CHUK,TERF1,CDK9,ATM,MAPK8,TRIM28,PAK1,HGS,TERF2,CDK4,JAK1,CCND1,SQSTM1,PRKCB,ATR,BCR,INSR,PTK2B,CHEK1,PAK2,TBK1,PRKCE,TNIK,RPS6KB1,I…
GO:MF	nucleoside phosphate binding	GO:1901265	5.89E-18	17.22991808	2161	617	156	18098	ACTR1B,GMDS,SEPHS1,GK5,UBE2D3,DNAH2,STK38,MYH6,PFKFB4,ATP6V1B2,RAB8A,SIRT2,PRKCD,BAG3,RYR1,TRIB1,PSMC2,TUBB2B,IFI44L,ACACA,RFC4,TOP2A,MYH11,NEK6,RPS6KA2,RAB1B,ASNS,PIP5K1C,RUNX2,MYH7,MTO1,RUNX1,ATP2A1,RAF1,SGK1,UBA1,ACTA1,DDX18,DHX30,CKM,KIF1A,TP53,SRC,EGFR,CSNK2A1,MAPK1,IKBKE,FYN,ABL1,AKT1,UBE2D2,PRKCA,ACTB,UBE2I,PRKACA,MAPK3,PRKDC,LCK,PARP1,SMARCA4,TGFBR1,HSPA8,RUVBL2,GSK3B,MCM7,EEF1A1,LYN,IKBK…
GO:MF	nucleotide binding	GO:0000166	1.47E-17	16.83140459	2160	617	155	18098	ACTR1B,GMDS,SEPHS1,GK5,UBE2D3,DNAH2,STK38,MYH6,PFKFB4,ATP6V1B2,RAB8A,SIRT2,PRKCD,BAG3,RYR1,TRIB1,PSMC2,TUBB2B,IFI44L,ACACA,RFC4,TOP2A,MYH11,NEK6,RPS6KA2,RAB1B,ASNS,PIP5K1C,RUNX2,MYH7,MTO1,RUNX1,ATP2A1,RAF1,SGK1,UBA1,ACTA1,DDX18,DHX30,CKM,KIF1A,TP53,SRC,EGFR,CSNK2A1,MAPK1,IKBKE,FYN,ABL1,AKT1,UBE2D2,PRKCA,ACTB,UBE2I,PRKACA,MAPK3,PRKDC,LCK,PARP1,SMARCA4,TGFBR1,HSPA8,RUVBL2,GSK3B,MCM7,EEF1A1,LYN,IKBK…
GO:MF	nucleic acid binding	GO:0003676	3.16E-17	16.50015864	4355	617	249	18098	RORC,SNRPF,CLNS1A,NFE2,ANKRD1,NR1H2,CSDA,DUX4,EXOSC1,NR4A1,SNRPN,MRPL14,ZMYM6,MYOCD,TXN,MIR99A,MEN1,RPUSD1,MRPS11,SPAG7,S100A4,RFC4,TOP2A,MRPS30,BHLHB3,ZNF93,ZNF135,SLC3A2,POP5,RXRA,AATF,FLNB,GTF2E2,IRF5,EPAS1,ZNF260,VEZF1,RPS26,H2AFZ,RUNX2,FOS,MTO1,RUNX1,SOX11,UBA1,MIR210,DDX18,DHX30,CDKN2A,RAE1,ZNF213,RALY,TPR,ZNF532,UBC,TP53,YWHAZ,ESR1,GRB2,EP300,CREBBP,HDAC1,MYC,AR,EGFR,SMAD3,JUN,SMAD2,BRCA1,…
GO:MF	phosphoprotein binding	GO:0051219	6.16E-17	16.21028935	83	617	27	18098	PTPN6,GRB2,SRC,MAPK1,PIK3R1,ABL1,RB1,MAPK3,PTPN11,LCK,CBL,SHC1,YWHAB,YWHAE,CRK,LYN,SYK,PIN1,EPB41,IRS1,SFN,VAV1,ARRB1,NEDD4,BTRC,TBK1,ZAP70
GO:MF	small molecule binding	GO:0036094	1.11E-16	15.95589739	2553	617	171	18098	ACTR1B,GMDS,SEPHS1,GK5,UBE2D3,DNAH2,STK38,MYH6,PFKFB4,ATP6V1B2,RAB8A,SIRT2,PRKCD,BAG3,RYR1,TRIB1,PSMC2,CD320,TUBB2B,IFI44L,ACACA,RFC4,GCAT,TOP2A,RXRA,VCAN,MYH11,NEK6,FOLR1,RPS6KA2,RAB1B,HBG1,ASNS,MB,PIP5K1C,CYTH2,RUNX2,MYH7,MTO1,RUNX1,ATP2A1,RAF1,SGK1,UBA1,CLN5,ACTA1,DDX18,DHX30,CKM,KIF1A,ALAS2,TP53,SRC,EGFR,CSNK2A1,MAPK1,IKBKE,FYN,ABL1,AKT1,UBE2D2,PRKCA,ACTB,UBE2I,PRKACA,RARA,MAPK3,PRKDC,LCK,PAR…
GO:MF	phosphatase binding	GO:0019902	1.54E-16	15.81219312	186	617	38	18098	SIGLEC10,TP53,GRB2,EGFR,SMAD3,SMAD2,CTNNB1,MAPK1,IKBKE,PIK3R1,AKT1,STAT3,MAPK3,LCK,STAT1,PPARG,MAPK14,SYK,ERBB2,BCL2,PPP1CA,JAK1,TBK1,CDC5L,VCP,MAPT,MAP3K5,STRN,CSK,STRN3,RPA2,DLG4,IRS2,GTF2F1,PPARA,IQGAP1,MET,JAK3
GO:MF	carbohydrate derivative binding	GO:0097367	1.56E-16	15.80766968	2256	617	157	18098	ACTR1B,SEPHS1,GK5,UBE2D3,COL2A1,DNAH2,STK38,COMP,MYH6,PFKFB4,ATP6V1B2,RAB8A,PRKCD,RYR1,TRIB1,PSMC2,TUBB2B,IFI44L,ACACA,RFC4,TOP2A,VCAN,MYH11,NEK6,RPS6KA2,RAB1B,ASNS,PIP5K1C,RUNX2,MYH7,RUNX1,ATP2A1,RAF1,SGK1,UBA1,ACTA1,DDX18,DHX30,CKM,KIF1A,VEGFA,TP53,SRC,EGFR,CSNK2A1,MAPK1,IKBKE,FYN,ABL1,AKT1,UBE2D2,PRKCA,ACTB,UBE2I,PRKACA,MAPK3,PRKDC,LCK,SMARCA4,TGFBR1,HSPA8,RUVBL2,GSK3B,MCM7,EEF1A1,LYN,IKBKB,TU…
GO:MF	anion binding	GO:0043168	2.52E-16	15.59833056	2820	617	182	18098	ACTR1B,TPCN1,GMDS,SEPHS1,GK5,UBE2D3,DNAH2,STK38,COMP,RUFY4,MYH6,PFKFB4,ATP6V1B2,RAB8A,SIRT2,PRKCD,RYR1,TRIB1,PSMC2,PLA2G2A,TUBB2B,IFI44L,ACACA,RFC4,GCAT,TOP2A,RXRA,VCAN,MYH11,NEK6,FOLR1,RPS6KA2,RAB1B,ASNS,PIP5K1C,CYTH2,RUNX2,MYH7,MTO1,RUNX1,ATP2A1,RAF1,SGK1,UBA1,ACTA1,DDX18,DHX30,CKM,KIF1A,ALAS2,VEGFA,TP53,SRC,EGFR,CSNK2A1,MAPK1,IKBKE,FYN,ABL1,AKT1,UBE2D2,PRKCA,ACTB,RELA,UBE2I,SMAD4,PRKACA,RARA,M…
GO:MF	protein serine/threonine kinase activity	GO:0004674	4.58E-16	15.33907166	443	617	58	18098	HFE2,STK38,PRKCD,NEK6,RPS6KA2,RAF1,SGK1,EGFR,CSNK2A1,MAPK1,IKBKE,AKT1,PRKCA,PRKACA,MAPK3,PRKDC,TGFBR1,GSK3B,IKBKB,MAPK14,CDK1,SYK,PRKCZ,PLK1,PRKAB1,MAP3K14,CSNK2A2,CHUK,CDK9,ATM,MAPK8,PAK1,CDK4,SQSTM1,PRKCB,ATR,BCR,PTK2B,CHEK1,PAK2,TBK1,PRKCE,TNIK,RPS6KB1,ILK,MAP3K5,PDPK1,MAP2K1,MAP3K7,STK24,CDK5,TGFBR2,PRKCG,TAF1,PIK3CA,CDK7,BMPR1B,ADRBK1
GO:MF	catalytic activity, acting on a protein	GO:0140096	2.26E-15	14.64499098	2233	617	153	18098	RNF220,CRELD1,UBE2D3,HFE2,PTPN6,STK38,PPIAL4G,MYH6,SIRT2,PAMR1,PRKCD,AMZ2,TRIB1,MEN1,KLK4,UCHL3,NEK6,RPS6KA2,RAF1,PRSS21,SGK1,FBXL20,CDKN2A,PSMA5,CTDSP2,KLHL21,NSMCE2,SRC,TRAF6,HDAC1,EGFR,BRCA1,CSNK2A1,MAPK1,IKBKE,FYN,MDM2,ABL1,AKT1,UBE2D2,PRKCA,HDAC2,UBE2I,PRKACA,VHL,MAPK3,PTPN11,PRKDC,LCK,CBL,SIN3A,HDAC3,PARP1,TGFBR1,PPP2CA,PPP2R2B,PPP2R1A,GSK3B,LYN,IKBKB,HDAC4,MAPK14,JAK2,CDK1,SYK,ERBB2,PIN1,C…
GO:MF	protein phosphorylated amino acid binding	GO:0045309	2.54E-15	14.59533212	51	617	21	18098	PTPN6,GRB2,MAPK1,PIK3R1,ABL1,MAPK3,PTPN11,LCK,CBL,SHC1,YWHAB,YWHAE,CRK,SYK,PIN1,IRS1,VAV1,ARRB1,NEDD4,BTRC,ZAP70
GO:MF	protein N-terminus binding	GO:0047485	1.88E-14	13.72507071	110	617	28	18098	NFE2,NIPBL,MEN1,TP53,TRAF6,HDAC1,CSNK2A1,MDM2,RELA,YWHAQ,PARP1,SMARCA4,NCOR2,NCOA1,NCOA3,SRRM2,DAXX,EPB41,CSNK2A2,ATM,ARF6,HSPA1A,SMARCC1,PHB2,MAP2K1,RPA2,SUV39H1,SMARCE1
GO:MF	protein phosphatase binding	GO:0019903	3.53E-14	13.4525412	141	617	31	18098	TP53,GRB2,EGFR,CTNNB1,IKBKE,PIK3R1,AKT1,STAT3,LCK,STAT1,PPARG,MAPK14,ERBB2,BCL2,PPP1CA,JAK1,TBK1,CDC5L,VCP,MAPT,MAP3K5,STRN,CSK,STRN3,RPA2,DLG4,IRS2,GTF2F1,IQGAP1,MET,JAK3
GO:MF	repressing transcription factor binding	GO:0070491	1.01E-13	12.99416874	74	617	23	18098	RUNX2,HDAC1,MYC,CTNNB1,RELA,SP1,HDAC2,STAT3,SIN3A,STAT1,TBP,PPARG,HDAC4,HTATIP,HDAC5,BCL2,TLE1,DDX20,HMGB1,CHD4,TCF3,CBX5,PPARA
GO:MF	SMAD binding	GO:0046332	1.97E-13	12.70635742	76	617	23	18098	ANKRD1,MYOCD,MEN1,FOS,SMAD3,JUN,SMAD2,CTNNB1,SMAD4,PARP1,PML,TGFBR1,SMAD1,FLNA,STUB1,SMURF1,SMURF2,YY1,SKIL,TGFBR2,AXIN1,DAB2,BMPR1B
GO:MF	enhancer binding	GO:0035326	1.57E-12	11.80492258	139	617	29	18098	BHLHB3,H2AFZ,SOX11,TP53,HDAC1,SMAD3,JUN,SMAD2,ACTB,RELA,HDAC2,NFKB1,SMARCA4,RUVBL2,SIRT1,RBBP4,ZBTB16,CREB1,YY1,SMARCC1,ATF2,SFPQ,CHD4,TCF3,TAL1,ATF4,SMARCB1,SMARCE1,HMGA1
GO:MF	cytoskeletal protein binding	GO:0008092	7.57E-12	11.12076201	984	617	83	18098	ACTR1B,PARVG,PSRC1,ANKRD1,MYH6,FMNL3,RAB8A,TCAP,ESPN,MYL2,MYOM1,TNNT3,S100A4,HSPB7,INF2,MYH11,NEK6,AATF,TNNI2,FLNB,CAP1,XIRP2,MYBPC2,MYH7,MYBPC1,ACTA1,RAE1,SYNPO2L,TPR,KIF1A,AMPD1,MYOZ1,TNNC2,EP300,EGFR,SMAD2,BRCA1,FYN,ABL1,ACTB,RELA,NFKB1,RARA,PPP2CA,CRK,GSK3B,PPARG,LYN,NCK1,FLNA,PIN1,EPB41,PLK1,STUB1,TERF1,APC,HSP90AA1,YWHAH,CDH1,PARK2,PRKCE,DISC1,PPP2CB,MAPT,HDAC6,DCTN1,SPTAN1,NDRG1,MYH9,ACTN1…
GO:MF	protein dimerization activity	GO:0046983	1.27E-11	10.89514243	1343	617	101	18098	CLNS1A,TPCN1,NBL1,S100P,NR4A1,MYOM1,TUBB2B,ADIPOR2,TOP2A,BHLHB3,TGFB3,RXRA,ASNS,EPAS1,FGG,H2AFZ,FOS,ATP2A1,RAF1,TPR,KIF1A,VEGFA,TP53,MYC,AR,EGFR,SMAD3,JUN,SMAD2,IKBKG,PIK3R1,AKT1,RELA,SP1,SMAD4,NFKB1,STAT3,RARA,PML,PPP2CA,YWHAE,H2AFX,NPM1,STAT1,NCOA1,NCOA3,RUVBL2,PPP2R1A,PPARG,CEBPB,IKBKB,FLNA,DAXX,ERBB2,HIF1A,CHUK,STUB1,TERF1,ATM,ZBTB16,TERF2,CAV1,HSP90AA1,E2F1,MYOD1,YWHAH,CDH1,BCL2,CEBPA,SQSTM1…
GO:MF	RNA polymerase II distal enhancer sequence-specific DNA binding	GO:0000980	3.70E-11	10.43165215	104	617	24	18098	BHLHB3,H2AFZ,TP53,HDAC1,JUN,ACTB,RELA,HDAC2,NFKB1,SMARCA4,RUVBL2,SIRT1,RBBP4,ZBTB16,CREB1,YY1,SMARCC1,ATF2,SFPQ,CHD4,TAL1,ATF4,SMARCB1,SMARCE1
GO:MF	enhancer sequence-specific DNA binding	GO:0001158	4.67E-11	10.33084947	125	617	26	18098	BHLHB3,H2AFZ,SOX11,TP53,HDAC1,JUN,ACTB,RELA,HDAC2,NFKB1,SMARCA4,RUVBL2,SIRT1,RBBP4,ZBTB16,CREB1,YY1,SMARCC1,ATF2,SFPQ,CHD4,TAL1,ATF4,SMARCB1,SMARCE1,HMGA1
GO:MF	DNA-binding transcription activator activity, RNA polymerase II-specific	GO:0001228	4.79E-11	10.31938416	427	617	49	18098	NR1H2,DUX4,NR4A1,MYOCD,IRF5,EPAS1,VEZF1,RUNX2,FOS,RUNX1,SOX11,TP53,ESR1,MYC,AR,SMAD3,JUN,SMAD2,NR3C1,RELA,SP1,SMAD4,NFKB1,STAT3,PARP1,STAT1,CEBPB,SMAD1,HIF1A,SIRT1,NFKB2,CREB1,MYOD1,CEBPA,STAT5A,ETS1,AIRE,CDC5L,ATF2,SRF,STAT5B,MYB,NOTCH1,RXRB,ATF4,PPARA,JUND,ATF3,NR1H3
GO:MF	ligand-activated transcription factor activity	GO:0098531	5.09E-11	10.29356804	47	617	17	18098	RORC,NR1H2,NR4A1,RXRA,ESR1,AR,NR3C1,STAT3,RARA,PPARG,VDR,ESR2,THRB,THRA,RXRB,PPARA,NR1H3
GO:MF	nuclear receptor activity	GO:0004879	5.09E-11	10.29356804	47	617	17	18098	RORC,NR1H2,NR4A1,RXRA,ESR1,AR,NR3C1,STAT3,RARA,PPARG,VDR,ESR2,THRB,THRA,RXRB,PPARA,NR1H3
GO:MF	DNA-binding transcription activator activity	GO:0001216	5.24E-11	10.2803823	428	617	49	18098	NR1H2,DUX4,NR4A1,MYOCD,IRF5,EPAS1,VEZF1,RUNX2,FOS,RUNX1,SOX11,TP53,ESR1,MYC,AR,SMAD3,JUN,SMAD2,NR3C1,RELA,SP1,SMAD4,NFKB1,STAT3,PARP1,STAT1,CEBPB,SMAD1,HIF1A,SIRT1,NFKB2,CREB1,MYOD1,CEBPA,STAT5A,ETS1,AIRE,CDC5L,ATF2,SRF,STAT5B,MYB,NOTCH1,RXRB,ATF4,PPARA,JUND,ATF3,NR1H3
GO:MF	chromatin DNA binding	GO:0031490	5.82E-11	10.23524337	106	617	24	18098	RXRA,H2AFZ,EP300,HDAC1,SMAD3,ACTB,RELA,HDAC2,STAT3,RARA,SMARCA4,RUVBL2,RBBP4,DHX9,THRB,THRA,MYOD1,SMARCC1,SRF,NOTCH1,CHD4,SMARCB1,SMARCE1,PPARGC1A
GO:MF	binding	GO:0005488	6.17E-11	10.20980769	15910	617	594	18098	MRFAP1L1,RNF220,RORC,SNRPF,ACTR1B,PARVG,CLNS1A,HPDL,ACTR6,TMEM219,TRAM1,TPCN1,CLTA,CMTM8,SERPINA6,TMEM14C,CRELD1,SAMM50,CALML6,PSRC1,LRRC8A,ENOPH1,NFE2,CCNDBP1,GMDS,SEPHS1,AIMP2,GK5,UBE2D3,COL2A1,DNAH2,MT1G,HFE2,PTPN6,STK38,ANKRD1,ATP6AP2,COMP,NR1H2,RUFY4,PPIAL4G,CSDA,IGFL3,ODF4,CEP250,NPHP1,MYH6,PFKFB4,PMP22,EFNB1,DUX4,MEPE,ATP6V1B2,SIGLEC10,FMNL3,PHIP,RAB8A,FHL2,NIPBL,EXOSC1,NBL1,PPFIA1,SIRT2,P…
GO:MF	activating transcription factor binding	GO:0033613	7.01E-11	10.15428152	88	617	22	18098	BHLHB3,NEK6,FOS,EP300,CREBBP,HDAC1,MYC,SMAD3,JUN,SMAD2,CTNNB1,RB1,RELA,NCOR1,SIN3A,NPM1,PPARG,HDAC4,CREB1,RBL1,ATF2,TAF9
GO:MF	cell adhesion molecule binding	GO:0050839	4.76E-10	9.322225784	502	617	52	18098	PTPN6,STK38,COMP,S100P,BAG3,CKAP5,SLC3A2,UNC45A,C9ORF47,FLNB,RPS26,FGG,YWHAZ,SRC,EGFR,CTNNB1,PRKCA,PTPN11,CBL,YWHAB,HSPA8,YWHAE,STAT1,LYN,NCK1,FLNA,SYK,SFN,HSPA5,HSPA1A,CDH1,PPP1CA,FN1,PAK2,KRT18,EEF1G,EEF1D,SPTAN1,ILK,NDRG1,MYH9,ACTN1,PCBP1,ANXA2,HMGB1,MAPRE1,STK24,ITGB1,PSEN1,IQGAP1,KDR,ITGB3
GO:MF	phosphotyrosine residue binding	GO:0001784	7.94E-10	9.100342535	40	617	15	18098	PTPN6,GRB2,MAPK1,PIK3R1,ABL1,MAPK3,PTPN11,LCK,CBL,SHC1,CRK,SYK,IRS1,VAV1,ZAP70
GO:MF	transferase activity	GO:0016740	8.78E-10	9.056314256	2359	617	143	18098	RNF220,SEPHS1,GK5,UBE2D3,HFE2,STK38,PFKFB4,SIRT2,PRKCD,TRIB1,MEN1,GCAT,NEK6,RPS6KA2,PIP5K1C,RAF1,SGK1,FBXL20,CDKN2A,CKM,CDK2AP2,ALAS2,DAD1,KLHL21,NSMCE2,YWHAZ,SRC,EP300,CREBBP,TRAF6,EGFR,BRCA1,CSNK2A1,MAPK1,IKBKE,FYN,MDM2,ABL1,AKT1,UBE2D2,PRKCA,UBE2I,PRKACA,VHL,MAPK3,PRKDC,LCK,CBL,PARP1,TGFBR1,NCOA1,NCOA3,GSK3B,LYN,IKBKB,HDAC4,POLR2A,MAPK14,JAK2,CDK1,SYK,ERBB2,CDKN1A,PRKCZ,PLK1,PRKAB1,MAP3K14,CSN…
GO:MF	steroid hormone receptor activity	GO:0003707	1.37E-09	8.864520913	56	617	17	18098	RORC,NR1H2,NR4A1,RXRA,ESR1,AR,NR3C1,RARA,PPARG,VDR,ESR2,THRB,THRA,NR0B2,RXRB,PPARA,NR1H3
GO:MF	cadherin binding	GO:0045296	1.72E-09	8.763257772	330	617	40	18098	STK38,S100P,BAG3,CKAP5,SLC3A2,UNC45A,FLNB,RPS26,YWHAZ,SRC,EGFR,CTNNB1,PTPN11,CBL,YWHAB,HSPA8,YWHAE,STAT1,NCK1,FLNA,SFN,HSPA5,HSPA1A,CDH1,PPP1CA,PAK2,KRT18,EEF1G,EEF1D,SPTAN1,NDRG1,MYH9,PCBP1,ANXA2,MAPRE1,STK24,ITGB1,PSEN1,IQGAP1,KDR
GO:MF	p53 binding	GO:0002039	2.37E-09	8.624514056	66	617	18	18098	ANKRD1,TP53,EP300,CREBBP,HDAC1,MDM2,SMARCA4,GSK3B,DAXX,HIF1A,SIRT1,USP7,TAF9,SMARCB1,CDK5,TAF1,BRD7,HTT
GO:MF	estrogen receptor binding	GO:0030331	2.72E-09	8.565559857	43	617	15	18098	TACC1,ESR1,SRC,CTNNB1,PCNA,PARP1,NCOA1,PPARG,NCOA6,ARRB1,NRIP1,STRN,PHB2,PPARGC1A,FUS
GO:MF	nuclear receptor transcription coactivator activity	GO:0030374	4.14E-09	8.382734578	68	617	18	18098	NR1H2,RARA,NCOA1,NCOA3,PPARG,NCOA6,VDR,THRB,THRA,PRKCB,NCOA2,ACTN1,TSG101,PPARA,PPARGC1A,CARM1,HMGA1,NR1H3
GO:MF	protein heterodimerization activity	GO:0046982	5.03E-09	8.298848656	517	617	51	18098	CLNS1A,NR4A1,TUBB2B,ADIPOR2,TOP2A,BHLHB3,TGFB3,RXRA,EPAS1,H2AFZ,FOS,RAF1,VEGFA,TP53,EGFR,JUN,IKBKG,PIK3R1,RELA,NFKB1,RARA,PPP2CA,YWHAE,H2AFX,NPM1,NCOA3,PPP2R1A,PPARG,CEBPB,IKBKB,DAXX,ERBB2,HIF1A,CHUK,CAV1,MYOD1,YWHAH,BCL2,ATF2,SMC1L1,TAF9,SOS1,TCF3,MAX,TAL1,ATF4,BARD1,ITGB1,ATF3,TAF1,CFLAR
GO:MF	insulin receptor substrate binding	GO:0043560	6.21E-09	8.207042976	12	617	9	18098	PRKCD,GRB2,PIK3R1,PTPN11,JAK2,PRKCZ,INSR,IGF1R,PIK3CA
GO:MF	glucocorticoid receptor binding	GO:0035259	6.92E-09	8.160131481	16	617	10	18098	NR4A1,TACC1,SMAD3,STAT3,NCOR2,CEBPB,SUMO1,YWHAH,NRIP1,STAT5B
GO:MF	ATPase activity, coupled	GO:0042623	9.73E-09	8.012109685	289	617	36	18098	DNAH2,MYH6,PSMC2,TNNT3,RFC4,TOP2A,MYH7,DDX18,DHX30,KIF1A,SMARCA4,HSPA8,RUVBL2,MCM7,XRCC5,RBBP4,MCM3,DHX9,HSP90AA1,HSPA5,HSPA1A,CHD3,MCM2,DNCL1,XRCC6,MCM5,MYH9,DDX20,MCM6,CHD4,PSMC1,PSMC6,DDX17,PSMC4,CDK7,GTF2F2
GO:MF	RNA binding	GO:0003723	1.50E-08	7.824970121	1902	617	119	18098	SNRPF,CLNS1A,CSDA,EXOSC1,SNRPN,MRPL14,TXN,MIR99A,RPUSD1,MRPS11,S100A4,TOP2A,MRPS30,SLC3A2,POP5,AATF,FLNB,GTF2E2,RPS26,MTO1,UBA1,MIR210,DDX18,DHX30,CDKN2A,RAE1,RALY,TPR,UBC,TP53,YWHAZ,GRB2,EP300,MYC,SMAD3,JUN,SMAD2,BRCA1,YWHAG,MDM2,NR3C1,HDAC2,UBE2I,RARA,PRKDC,SIN3A,RPS27A,PARP1,SMARCA4,HSPA8,YWHAE,NPM1,EEF1A1,SMAD1,SUMO1,VIM,SRRM2,SUMO2,POLR2A,FLNA,GC20,XRCC5,DHX9,SRRM1,RNPS1,CDK9,TRIM28,RBBP7,HS…
GO:MF	retinoid X receptor binding	GO:0046965	1.63E-08	7.788218501	17	617	10	18098	TACC1,NCOR2,NCOA1,PPARG,NCOA6,VDR,NRIP1,NR0B2,FUS,HMGA1
GO:MF	core promoter binding	GO:0001047	1.70E-08	7.770377	56	617	16	18098	H2AFZ,FOS,TP53,HDAC1,MYC,NR3C1,SMARCA4,NPM1,STAT1,TBP,RUVBL2,CEBPB,POLR2A,GTF2B,POU2F1,SMARCB1
GO:MF	promoter-specific chromatin binding	GO:1990841	2.34E-08	7.631039792	49	617	15	18098	TP53,HDAC1,HDAC2,STAT1,HDAC4,POLR2A,DHX9,TRIM28,MYOD1,RBL1,SETDB1,GTF2B,GTF2F1,PPARGC1A,DNMT1
GO:MF	DNA-binding transcription factor activity, RNA polymerase II-specific	GO:0000981	3.87E-08	7.411741872	1095	617	80	18098	RORC,NFE2,NR1H2,CSDA,DUX4,NR4A1,ZMYM6,MYOCD,BHLHB3,RXRA,IRF5,EPAS1,VEZF1,RUNX2,FOS,RUNX1,SOX11,TP53,ESR1,MYC,AR,SMAD3,JUN,SMAD2,NR3C1,RELA,SP1,SMAD4,NFKB1,STAT3,RARA,PARP1,STAT1,NCOA1,NCOA3,PPARG,CEBPB,SMAD1,HIF1A,SIRT1,VDR,TERF1,ESR2,THRB,NFKB2,ZBTB16,CREB1,TERF2,THRA,E2F1,MYOD1,TSC22D1,CEBPA,STAT5A,ETS1,NCOA2,AIRE,PARK2,YY1,CDC5L,ATF2,SRF,NR0B2,STAT5B,SKIL,MYB,PCBP1,NOTCH1,SMAD9,POU2F1,TCF3,MAX…
GO:MF	molecular adaptor activity	GO:0060090	5.81E-08	7.235920328	249	617	32	18098	ACTR1B,AIMP2,TCAP,MEN1,GRB2,SRC,PIK3R1,PTPN11,SHC1,HSPA8,CRK,SUMO1,NCK1,IRS1,STUB1,CAV1,ARRB2,DDB1,DISC1,MAPT,MYH9,DDX20,KHDRBS1,BCL3,GAB2,DVL2,AKAP9,CBX5,IQGAP1,AXIN1,PSMC6,GRB10
GO:MF	androgen receptor binding	GO:0050681	5.82E-08	7.234731513	44	617	14	18098	FHL2,EP300,BRCA1,CTNNB1,RB1,SMARCA4,NCOA1,NCOA3,DAXX,HTATIP,PRKCB,NRIP1,PPARGC1A,CDK7
GO:MF	protein tyrosine kinase activity	GO:0004713	5.94E-08	7.22640446	144	617	24	18098	PRKCD,SRC,EGFR,FYN,ABL1,LCK,LYN,JAK2,SYK,ERBB2,JAK1,INSR,PTK2B,BTK,IGF1R,PDGFRB,CSK,MAP2K1,ZAP70,KIT,ERBB4,KDR,MET,JAK3
GO:MF	tau protein binding	GO:0048156	8.19E-08	7.086569558	45	617	14	18098	AATF,EP300,SMAD2,FYN,ACTB,PPP2CA,GSK3B,PIN1,STUB1,HSP90AA1,PPP2CB,HDAC6,DCTN1,CDK5
GO:MF	non-membrane spanning protein tyrosine kinase activity	GO:0004715	1.14E-07	6.94264905	46	617	14	18098	PRKCD,SRC,FYN,ABL1,LCK,LYN,JAK2,SYK,JAK1,PTK2B,BTK,CSK,ZAP70,JAK3
GO:MF	scaffold protein binding	GO:0097110	1.93E-07	6.71363258	56	617	15	18098	SRC,MDM2,MAPK3,YWHAE,CRK,IKBKB,VIM,CHUK,CASP8,HSP90AA1,CDC37,KRT18,MAP2K1,DLG4,MAP3K7
GO:MF	disordered domain specific binding	GO:0097718	3.22E-07	6.492216396	34	617	12	18098	CDKN2A,TP53,SMAD2,CTNNB1,FYN,MDM2,RB1,NCOA3,HSP90AA1,HSPA1A,FN1,CLTC
GO:MF	ion binding	GO:0043167	4.05E-07	6.392222132	6276	617	286	18098	RNF220,RORC,ACTR1B,HPDL,TPCN1,CRELD1,CALML6,ENOPH1,GMDS,SEPHS1,GK5,UBE2D3,COL2A1,DNAH2,MT1G,STK38,COMP,NR1H2,RUFY4,MYH6,PFKFB4,ATP6V1B2,RAB8A,FHL2,SIRT2,PAMR1,PRKCD,AMZ2,S100P,NR4A1,RYR1,TRIB1,PSMC2,MYL2,PLA2G2A,CD320,ZMYM6,TUBB2B,TNNT3,ADIPOR2,COX17,IFI44L,S100A4,ACACA,RFC4,GCAT,TOP2A,MT2A,ZNF93,ZNF135,RXRA,VCAN,KLK4,MYH11,NEK6,SCD,FOLR1,CHRNA4,RPS6KA2,RAB1B,HBG1,ASNS,ZNF260,VEZF1,MB,FGG,PIP5K1C…
GO:MF	histone acetyltransferase binding	GO:0035035	6.89E-07	6.161609876	29	617	11	18098	SIRT2,MYOCD,EPAS1,TP53,SP1,PCNA,STAT1,CEBPB,HIF1A,CREB1,ETS1
GO:MF	ephrin receptor binding	GO:0046875	6.89E-07	6.161609876	29	617	11	18098	EFNB1,GRB2,SRC,FYN,ABL1,CBL,SHC1,CRK,LYN,NCK1,CDK5
GO:MF	RNA polymerase II transcription factor binding	GO:0001085	7.17E-07	6.144735368	61	617	15	18098	ANKRD1,TP53,EP300,CREBBP,HDAC1,AR,CTNNB1,SMAD4,GSK3B,HDAC4,DHX9,HDAC5,ATN1,TAL1,ATF4
GO:MF	insulin receptor binding	GO:0005158	7.96E-07	6.099206313	23	617	10	18098	PHIP,SRC,PIK3R1,PTPN11,SHC1,IRS1,IGF1R,PDPK1,IRS2,GRB10
GO:MF	R-SMAD binding	GO:0070412	7.96E-07	6.099206313	23	617	10	18098	ANKRD1,MYOCD,MEN1,FOS,SMAD3,JUN,SMAD2,SMAD4,PARP1,SMURF1
GO:MF	DNA-binding transcription factor activity	GO:0003700	9.37E-07	6.028339693	1341	617	88	18098	RORC,NFE2,NR1H2,CSDA,DUX4,NR4A1,ZMYM6,MYOCD,BHLHB3,ZNF93,ZNF135,RXRA,IRF5,EPAS1,VEZF1,RUNX2,FOS,RUNX1,SOX11,ZNF213,TP53,ESR1,MYC,AR,SMAD3,JUN,SMAD2,CTNNB1,NR3C1,RB1,RELA,SP1,SMAD4,NFKB1,STAT3,RARA,SIN3A,PARP1,STAT1,TBP,NCOA1,NCOA3,PPARG,CEBPB,SMAD1,HIF1A,SIRT1,VDR,TERF1,ESR2,THRB,NFKB2,ZBTB16,CREB1,TERF2,THRA,E2F1,MYOD1,TSC22D1,CEBPA,STAT5A,ETS1,NCOA2,AIRE,PARK2,YY1,CDC5L,ATF2,SRF,NR0B2,STAT5B,SK…
GO:MF	protein binding, bridging	GO:0030674	1.35E-06	5.870551075	208	617	27	18098	ACTR1B,TCAP,MEN1,GRB2,SRC,PIK3R1,PTPN11,SHC1,HSPA8,CRK,SUMO1,NCK1,IRS1,STUB1,CAV1,DDB1,MAPT,MYH9,DDX20,KHDRBS1,BCL3,GAB2,DVL2,CBX5,AXIN1,PSMC6,GRB10
GO:MF	phosphatidylinositol 3-kinase binding	GO:0043548	1.59E-06	5.799914105	31	617	11	18098	PIK3R1,FYN,LCK,CBL,JAK2,IRS1,INSR,IGF1R,PDGFRB,DNM2,IRS2
GO:MF	heat shock protein binding	GO:0031072	2.12E-06	5.672832902	120	617	20	18098	UNC45A,TPR,CSNK2A1,NR3C1,HDAC2,HSPA8,CDK1,DAXX,HIF1A,STUB1,CREB1,HSPA5,HSPA1A,CDC37,PARK2,MAPT,HDAC6,CDK5,KDR,HTT
GO:MF	retinoic acid receptor binding	GO:0042974	3.37E-06	5.472661388	26	617	10	18098	TACC1,NCOR2,NCOA1,PPARG,NCOA6,VDR,NRIP1,NR0B2,FUS,HMGA1
GO:MF	NAD-dependent histone deacetylase activity	GO:0017136	4.78E-06	5.320351035	15	617	8	18098	SIRT2,HDAC1,HDAC2,HDAC3,HDAC4,SIRT1,HDAC5,HDAC6
GO:MF	general transcription initiation factor binding	GO:0140296	5.06E-06	5.296149689	42	617	12	18098	PSMC2,GTF2E2,TP53,ESR1,AR,TBP,RUVBL2,PSMC5,THRA,GTF2B,PSMC1,TAF1
GO:MF	I-SMAD binding	GO:0070411	7.98E-06	5.097977118	11	617	7	18098	SMAD2,CTNNB1,SMAD4,TGFBR1,SMAD1,SMURF1,AXIN1
GO:MF	transcription corepressor activity	GO:0003714	9.06E-06	5.042774972	242	617	28	18098	ANKRD1,CSDA,BHLHB3,CREBBP,HDAC1,RARA,NCOR1,SIN3A,HDAC3,SMARCA4,NCOR2,RUVBL2,HDAC4,DAXX,SIRT1,THRB,TRIM28,HSPA1A,CCND1,TLE1,ATN1,YY1,NRIP1,NR0B2,SKIL,TSG101,ATF3,BRD7
GO:MF	insulin-like growth factor receptor binding	GO:0005159	9.28E-06	5.032483407	16	617	8	18098	YWHAG,PIK3R1,SHC1,CRK,IRS1,YWHAH,ARRB1,INSR
GO:MF	NAD-dependent protein deacetylase activity	GO:0034979	9.28E-06	5.032483407	16	617	8	18098	SIRT2,HDAC1,HDAC2,HDAC3,HDAC4,SIRT1,HDAC5,HDAC6
GO:MF	SH2 domain binding	GO:0042169	9.63E-06	5.016384737	36	617	11	18098	PTPN6,SIGLEC10,SRC,ABL1,LCK,CRK,JAK2,SYK,IRS1,SQSTM1,KIT
GO:MF	NF-kappaB binding	GO:0051059	1.16E-05	4.936428667	29	617	10	18098	CDKN2A,EP300,HDAC1,RELA,HDAC2,HDAC3,NPM1,NFKBIA,GSK3B,PSMA6
GO:MF	RNA polymerase II activating transcription factor binding	GO:0001102	1.20E-05	4.922606812	54	617	13	18098	BHLHB3,FOS,EP300,CREBBP,SMAD3,JUN,CTNNB1,RB1,NCOR1,SIN3A,CREB1,RBL1,ATF2
GO:MF	core promoter sequence-specific DNA binding	GO:0001046	1.20E-05	4.921712328	45	617	12	18098	H2AFZ,FOS,TP53,HDAC1,SMARCA4,STAT1,TBP,RUVBL2,CEBPB,GTF2B,POU2F1,SMARCB1
GO:MF	ATPase activity	GO:0016887	2.11E-05	4.674777294	435	617	39	18098	DNAH2,MYH6,PSMC2,TNNT3,RFC4,TOP2A,MYH7,DDX18,DHX30,KIF1A,SMARCA4,HSPA8,RUVBL2,MCM7,XRCC5,RBBP4,MCM3,DHX9,PSMC5,HSP90AA1,HSPA5,HSPA1A,CHD3,MCM2,MLH1,DNCL1,VCP,XRCC6,MCM5,MYH9,DDX20,MCM6,CHD4,PSMC1,PSMC6,DDX17,PSMC4,CDK7,GTF2F2
GO:MF	protein tag	GO:0031386	2.13E-05	4.671404794	8	617	6	18098	UBA52,UBC,UBB,RPS27A,SUMO1,NEDD8
GO:MF	receptor tyrosine kinase binding	GO:0030971	2.93E-05	4.532625974	68	617	14	18098	TP53,YWHAG,PIK3R1,PCNA,PTPN11,PLCG1,CBL,SHC1,NCK1,IRS1,SQSTM1,GAB2,MAP3K7,DAZAP2
GO:MF	protein tyrosine kinase binding	GO:1990782	4.11E-05	4.386062344	92	617	16	18098	TP53,YWHAG,PIK3R1,PCNA,PTPN11,PLCG1,CBL,SHC1,CRK,NCK1,IRS1,HSP90AA1,SQSTM1,GAB2,MAP3K7,DAZAP2
GO:MF	protein homodimerization activity	GO:0042803	5.59E-05	4.2529532	859	617	60	18098	TPCN1,NBL1,S100P,NR4A1,MYOM1,TOP2A,BHLHB3,ASNS,FGG,ATP2A1,TPR,KIF1A,VEGFA,TP53,SMAD3,JUN,SMAD2,IKBKG,AKT1,RELA,SP1,SMAD4,NFKB1,STAT3,PML,NPM1,STAT1,RUVBL2,CEBPB,IKBKB,FLNA,CHUK,STUB1,TERF1,ZBTB16,TERF2,HSP90AA1,CDH1,BCL2,CEBPA,SQSTM1,MAPT,SRF,NR0B2,MAP3K5,MYH9,ACTN1,TSG101,SFPQ,TCF3,MAX,CBX5,BARD1,KIT,HSPB1,CARM1,ATF3,PTPRC,ERBB4,AXIN1
GO:MF	beta-catenin binding	GO:0008013	7.28E-05	4.137691491	84	617	15	18098	ESR1,EP300,AR,SMAD3,RUVBL2,GSK3B,PIN1,APC,CDH1,PARK2,BTRC,HDAC6,PSEN1,CARM1,AXIN1
GO:MF	ubiquitin-like protein binding	GO:0032182	7.61E-05	4.118637515	96	617	16	18098	SIRT2,TOP2A,UCHL3,RAE1,SMAD3,IKBKG,MDM2,NR3C1,PML,DAXX,NEDD4,SQSTM1,PARK2,HDAC6,TSG101,HSPB1
GO:MF	DNA-dependent ATPase activity	GO:0008094	0.00011106	3.954441625	111	617	17	18098	RFC4,TOP2A,SMARCA4,RUVBL2,MCM7,XRCC5,RBBP4,MCM3,DHX9,CHD3,MCM2,XRCC6,MCM5,MCM6,CHD4,CDK7,GTF2F2
GO:MF	catalytic activity	GO:0003824	0.000138007	3.860099295	5840	617	258	18098	RNF220,HPDL,LPIN2,CRELD1,ENOPH1,GMDS,SEPHS1,GK5,UBE2D3,DNAH2,HFE2,PTPN6,STK38,ATP6AP2,PPIAL4G,MYH6,PFKFB4,ATP6V1B2,RAB8A,SIRT2,PAMR1,PRKCD,AMZ2,FOXRED1,TRIB1,PSMC2,PLA2G2A,TXN,TUBB2B,TNNT3,MEN1,RPUSD1,ACACA,RFC4,GCAT,TOP2A,SLC3A2,POP5,KLK4,MYH11,UCHL3,NEK6,SCD,COX7A2,RPS6KA2,RAB1B,HBG1,ASNS,PIP5K1C,DERA,MYH7,RAF1,PRSS21,SGK1,UBA1,FBXL20,DDX18,DHX30,CDKN2A,GNG10,CKM,CDK2AP2,PSMA5,KIF1A,AMPD1,SMOX,…
GO:MF	NAD-dependent histone deacetylase activity (H3-K14 specific)	GO:0032041	0.000150723	3.821820647	10	617	6	18098	HDAC1,HDAC2,HDAC3,HDAC4,HDAC5,HDAC6
GO:MF	histone deacetylase activity (H3-K14 specific)	GO:0031078	0.000150723	3.821820647	10	617	6	18098	HDAC1,HDAC2,HDAC3,HDAC4,HDAC5,HDAC6
GO:MF	histone deacetylase activity	GO:0004407	0.000167917	3.774905795	29	617	9	18098	SIRT2,HDAC1,HDAC2,SIN3A,HDAC3,HDAC4,SIRT1,HDAC5,HDAC6
GO:MF	TBP-class protein binding	GO:0017025	0.000192265	3.716098962	22	617	8	18098	PSMC2,ESR1,RUVBL2,PSMC5,THRA,GTF2B,PSMC1,TAF1
GO:MF	protein deacetylase activity	GO:0033558	0.000232665	3.63326836	30	617	9	18098	SIRT2,HDAC1,HDAC2,SIN3A,HDAC3,HDAC4,SIRT1,HDAC5,HDAC6
GO:MF	nucleosomal DNA binding	GO:0031492	0.000349075	3.457081544	40	617	10	18098	H2AFZ,HDAC1,ACTB,HDAC2,SMARCA4,RBBP4,SMARCC1,CHD4,SMARCB1,SMARCE1
GO:MF	Hsp90 protein binding	GO:0051879	0.000447692	3.349020547	41	617	10	18098	UNC45A,CSNK2A1,NR3C1,HIF1A,STUB1,CDC37,MAPT,HDAC6,CDK5,KDR
GO:MF	DNA helicase activity	GO:0003678	0.000513349	3.289587338	73	617	13	18098	RFC4,RUVBL2,MCM7,XRCC5,MCM3,DHX9,CHD3,MCM2,XRCC6,MCM5,MCM6,CHD4,GTF2F2
GO:MF	peroxisome proliferator activated receptor binding	GO:0042975	0.000625439	3.203814862	12	617	6	18098	TACC1,IKBKG,MDM2,NR0B2,PPARGC1A,HMGA1
GO:MF	proteasome-activating ATPase activity	GO:0036402	0.000704332	3.152222583	4	617	4	18098	PSMC2,PSMC1,PSMC6,PSMC4
GO:MF	transcription cofactor binding	GO:0001221	0.000719981	3.142678746	43	617	10	18098	RORC,NEK6,ESR1,RELA,SUMO1,SUMO2,CDK9,CREB1,CDC5L,PPARA
GO:MF	RNA polymerase II core promoter sequence-specific DNA binding	GO:0000979	0.000754948	3.122083191	34	617	9	18098	H2AFZ,FOS,HDAC1,STAT1,TBP,RUVBL2,CEBPB,GTF2B,POU2F1
GO:MF	protein serine/threonine/tyrosine kinase activity	GO:0004712	0.000903533	3.044055808	44	617	10	18098	RPS6KA2,SGK1,MAPK1,AKT1,PRKACA,MAPK3,MAPK14,RPS6KB1,MAP2K1,PRKCG
GO:MF	mitogen-activated protein kinase kinase kinase binding	GO:0031435	0.000959707	3.01786151	19	617	7	18098	STK38,TRAF6,MAPK1,CDC42,TCF3,TGFBR2,DAZAP2
GO:MF	ubiquitin binding	GO:0043130	0.00096494	3.015499837	77	617	13	18098	SIRT2,TOP2A,UCHL3,RAE1,SMAD3,IKBKG,MDM2,NEDD4,SQSTM1,PARK2,HDAC6,TSG101,HSPB1
GO:MF	RNA polymerase II repressing transcription factor binding	GO:0001103	0.001274871	2.894533922	36	617	9	18098	HDAC1,SP1,HDAC2,STAT3,SIN3A,TBP,PPARG,CHD4,PPARA
GO:MF	nucleoside-triphosphatase activity	GO:0017111	0.001304501	2.88455565	816	617	54	18098	DNAH2,MYH6,RAB8A,PSMC2,TUBB2B,TNNT3,RFC4,TOP2A,MYH11,RAB1B,MYH7,DDX18,DHX30,GNG10,KIF1A,SMARCA4,HSPA8,RUVBL2,MCM7,EEF1A1,TUBB,PIN1,XRCC5,RBBP4,MCM3,DHX9,CDC42,ARF6,PSMC5,HSP90AA1,HSPA5,HSPA1A,CHD3,MCM2,MLH1,DNCL1,VCP,XRCC6,DCTN1,MCM5,MYH9,DDX20,MCM6,DNM2,CHD4,PSMC1,HRAS,TUBA4A,RHOA,PSMC6,DDX17,PSMC4,CDK7,GTF2F2
GO:MF	transmembrane receptor protein kinase activity	GO:0019199	0.002004177	2.698063841	82	617	13	18098	HFE2,EGFR,TGFBR1,ERBB2,INSR,IGF1R,PDGFRB,KIT,TGFBR2,ERBB4,KDR,BMPR1B,MET
GO:MF	protein kinase regulator activity	GO:0019887	0.00204088	2.690182632	181	617	20	18098	TRIB1,CDKN2A,YWHAG,NPM1,NCK1,DAXX,CDKN1A,SFN,APC,CDK4,CDC37,CCND1,PAK2,MAP2K1,KAT2B,HSPB1,IQGAP1,DAZAP2,PIK3CA,CCNB1
GO:MF	transforming growth factor beta receptor, pathway-specific cytoplasmic mediator activity	GO:0030618	0.003426213	2.465185673	5	617	4	18098	SMAD3,SMAD2,SMAD1,SMAD9
GO:MF	E-box binding	GO:0070888	0.003752914	2.425631437	51	617	10	18098	BHLHB3,HDAC1,MYC,PPARG,HIF1A,MYOD1,SFPQ,TCF3,MAX,TAL1
GO:MF	helicase activity	GO:0004386	0.004397305	2.356813399	159	617	18	18098	RFC4,DDX18,DHX30,SMARCA4,RUVBL2,MCM7,XRCC5,MCM3,DHX9,CHD3,MCM2,XRCC6,MCM5,DDX20,MCM6,CHD4,DDX17,GTF2F2
GO:MF	cytokine binding	GO:0019955	0.004780014	2.320570832	130	617	16	18098	HFE2,COMP,NBL1,TCAP,IL13RA1,TGFB3,TGFBR1,TNFRSF1A,COPS5,TNFRSF1B,HMGB1,KIT,ITGB1,TGFBR2,TNFRSF14,ITGB3
GO:MF	protein kinase C activity	GO:0004697	0.004822093	2.316764376	16	617	6	18098	PRKCD,PRKCA,PRKCZ,PRKCB,PRKCE,PRKCG
GO:MF	GTPase activating protein binding	GO:0032794	0.004822093	2.316764376	16	617	6	18098	FMNL3,PLXNB1,AKT1,TUBB,PIN1,CDH1
GO:MF	single-stranded DNA binding	GO:0003697	0.004948722	2.305506918	116	617	15	18098	MCM7,MCM3,DHX9,TERF1,TERF2,MCM2,MLH1,HNRPA1,MAPT,MCM5,PCBP1,MCM6,HMGB1,RPA2,PCBP2
GO:MF	transforming growth factor beta receptor, cytoplasmic mediator activity	GO:0005072	0.005213326	2.282885105	10	617	5	18098	SMAD3,SMAD2,SMAD4,SMAD1,SMAD9
GO:MF	protease binding	GO:0002020	0.005276393	2.277662841	131	617	16	18098	COMP,RYR1,UBC,TP53,GSK3B,BCL2,FN1,PARK2,VCP,CLTC,ANXA2,KIT,ITGB1,ITGB3,CFLAR,FADD
GO:MF	protein kinase C binding	GO:0005080	0.00538628	2.268711061	53	617	10	18098	TOP2A,SRC,YWHAG,ABL1,AKT1,IRS1,HDAC5,SQSTM1,PRKCB,HSPB1
GO:MF	kinase regulator activity	GO:0019207	0.006107051	2.214168445	211	617	21	18098	TRIB1,CDKN2A,YWHAG,PIK3R1,NPM1,NCK1,DAXX,CDKN1A,SFN,APC,CDK4,CDC37,CCND1,PAK2,MAP2K1,KAT2B,HSPB1,IQGAP1,DAZAP2,PIK3CA,CCNB1
GO:MF	histone kinase activity	GO:0035173	0.007237873	2.140389061	17	617	6	18098	PRKCA,JAK2,CDK1,PRKCB,CHEK1,CCNB1
GO:MF	single-stranded DNA helicase activity	GO:0017116	0.007237873	2.140389061	17	617	6	18098	RFC4,MCM7,DHX9,MCM2,MCM5,MCM6
GO:MF	pyrophosphatase activity	GO:0016462	0.007262867	2.138891916	866	617	54	18098	DNAH2,MYH6,RAB8A,PSMC2,TUBB2B,TNNT3,RFC4,TOP2A,MYH11,RAB1B,MYH7,DDX18,DHX30,GNG10,KIF1A,SMARCA4,HSPA8,RUVBL2,MCM7,EEF1A1,TUBB,PIN1,XRCC5,RBBP4,MCM3,DHX9,CDC42,ARF6,PSMC5,HSP90AA1,HSPA5,HSPA1A,CHD3,MCM2,MLH1,DNCL1,VCP,XRCC6,DCTN1,MCM5,MYH9,DDX20,MCM6,DNM2,CHD4,PSMC1,HRAS,TUBA4A,RHOA,PSMC6,DDX17,PSMC4,CDK7,GTF2F2
GO:MF	actin binding	GO:0003779	0.007561613	2.121385577	432	617	33	18098	PARVG,MYH6,FMNL3,ESPN,MYL2,MYOM1,TNNT3,S100A4,INF2,MYH11,TNNI2,FLNB,CAP1,XIRP2,MYBPC2,MYH7,MYBPC1,SYNPO2L,MYOZ1,TNNC2,EGFR,ABL1,FLNA,EPB41,YWHAH,PARK2,PRKCE,MAPT,HDAC6,SPTAN1,MYH9,ACTN1,ITGB1
GO:MF	hydrolase activity, acting on acid anhydrides, in phosphorus-containing anhydrides	GO:0016818	0.008260335	2.08300234	870	617	54	18098	DNAH2,MYH6,RAB8A,PSMC2,TUBB2B,TNNT3,RFC4,TOP2A,MYH11,RAB1B,MYH7,DDX18,DHX30,GNG10,KIF1A,SMARCA4,HSPA8,RUVBL2,MCM7,EEF1A1,TUBB,PIN1,XRCC5,RBBP4,MCM3,DHX9,CDC42,ARF6,PSMC5,HSP90AA1,HSPA5,HSPA1A,CHD3,MCM2,MLH1,DNCL1,VCP,XRCC6,DCTN1,MCM5,MYH9,DDX20,MCM6,DNM2,CHD4,PSMC1,HRAS,TUBA4A,RHOA,PSMC6,DDX17,PSMC4,CDK7,GTF2F2
GO:MF	hydrolase activity, acting on acid anhydrides	GO:0016817	0.008260335	2.08300234	870	617	54	18098	DNAH2,MYH6,RAB8A,PSMC2,TUBB2B,TNNT3,RFC4,TOP2A,MYH11,RAB1B,MYH7,DDX18,DHX30,GNG10,KIF1A,SMARCA4,HSPA8,RUVBL2,MCM7,EEF1A1,TUBB,PIN1,XRCC5,RBBP4,MCM3,DHX9,CDC42,ARF6,PSMC5,HSP90AA1,HSPA5,HSPA1A,CHD3,MCM2,MLH1,DNCL1,VCP,XRCC6,DCTN1,MCM5,MYH9,DDX20,MCM6,DNM2,CHD4,PSMC1,HRAS,TUBA4A,RHOA,PSMC6,DDX17,PSMC4,CDK7,GTF2F2
GO:MF	histone binding	GO:0042393	0.008505355	2.07030754	199	617	20	18098	PHIP,SMARCA4,H2AFX,NPM1,STAT1,JAK2,DAXX,SIRT1,RBBP4,HTATIP,MCM2,SET,PRKCB,AIRE,SMARCC1,ING1,CBX5,CARM1,TAF1,BRD7
GO:MF	cytokine receptor binding	GO:0005126	0.008520491	2.069535379	285	617	25	18098	TSLP,TGFB3,VEGFA,GRB2,TRAF6,SMAD3,SMAD2,PIK3R1,STAT3,PLCG1,SHC1,TGFBR1,STAT1,JAK2,SYK,CASP8,SMURF2,JAK1,GH1,FASLG,ITCH,TGFBR2,ITGB3,CFLAR,FADD
GO:MF	zinc ion binding	GO:0008270	0.008976784	2.046879236	829	617	52	18098	RORC,MT1G,NR1H2,SIRT2,AMZ2,NR4A1,ZMYM6,MT2A,ZNF93,RXRA,NSMCE2,TP53,ESR1,EP300,CREBBP,TRAF6,AR,SMAD3,BRCA1,MDM2,NR3C1,PRKCA,RARA,PARP1,PML,PPARG,HDAC4,VDR,ESR2,THRB,TRIM28,THRA,CHD3,SQSTM1,SF3A2,PRKCB,AIRE,PARK2,YY1,HDAC6,SETDB1,GTF2B,CHD4,SUV39H1,RXRB,SIAH1,PPARA,DNMT1,PRKCG,MDM4,RNF11,NR1H3
GO:MF	neurotrophin TRK receptor binding	GO:0005167	0.010000368	1.999984023	6	617	4	18098	GRB2,PIK3R1,PLCG1,SHC1
GO:MF	neurotrophin TRKA receptor binding	GO:0005168	0.010000368	1.999984023	6	617	4	18098	GRB2,PIK3R1,PLCG1,SHC1
GO:MF	deacetylase activity	GO:0019213	0.011004738	1.958420306	46	617	9	18098	SIRT2,HDAC1,HDAC2,SIN3A,HDAC3,HDAC4,SIRT1,HDAC5,HDAC6
GO:MF	enzyme regulator activity	GO:0030234	0.011720404	1.931057417	1037	617	61	18098	SERPINA6,PRKCD,BAG3,TRIB1,PLXNB1,TIAM2,RAF1,SLN,CDKN2A,MYOZ1,TP53,ESR1,EGFR,JUN,YWHAG,IKBKE,PIK3R1,AKT1,PCNA,NPM1,PPP2R2B,PPP2R1A,NCK1,DAXX,CDKN1A,XRCC5,MAP3K14,APP,SFN,MAPK8,APC,CAV1,HSP90AA1,CHM,CDK4,ARRB1,FN1,CDC37,SET,CCND1,BCR,PAK2,VCP,PRKCE,PSMD2,NOTCH1,PDPK1,MAP2K1,ANXA2,SOS1,KAT2B,GTF2F1,GIT1,HSPB1,PPP2R1B,IQGAP1,UCHL5,DAZAP2,PIK3CA,CCNB1,CFLAR
GO:MF	ion channel binding	GO:0044325	0.012288419	1.910503992	125	617	15	18098	TCAP,YWHAZ,SRC,CTNNB1,FYN,YWHAQ,YWHAE,LYN,FLNA,CAV1,YWHAH,ARRB1,ACTN1,AKAP9,HTT
GO:MF	nucleosome binding	GO:0031491	0.013898429	1.857034275	71	617	11	18098	ACTR6,H2AFZ,HDAC1,ACTB,HDAC2,SMARCA4,RBBP4,SMARCC1,CHD4,SMARCB1,SMARCE1
GO:MF	catalytic activity, acting on DNA	GO:0140097	0.015104115	1.820904722	207	617	20	18098	RFC4,TOP2A,PCNA,RUVBL2,MCM7,XRCC5,MCM3,DHX9,TERF1,TERF2,CHD3,MCM2,MGMT,XRCC6,MCM5,MCM6,CHD4,DNMT1,HMGA1,GTF2F2
GO:MF	bHLH transcription factor binding	GO:0043425	0.017257859	1.76301309	28	617	7	18098	BHLHB3,RUNX2,CREBBP,SMAD3,SP1,SIRT1,TCF3
GO:MF	modification-dependent protein binding	GO:0140030	0.020657442	1.684923468	146	617	16	18098	PTPN6,PHIP,IKBKG,IKBKE,SMARCA4,LYN,SQSTM1,PSMD4,VCP,HDAC6,UBQLN4,ING1,CBX5,CARM1,TAF1,BRD7
GO:MF	vitamin D response element binding	GO:0070644	0.020757146	1.682832367	3	617	3	18098	RXRA,VDR,TCF3
GO:MF	IkappaB kinase activity	GO:0008384	0.020757146	1.682832367	3	617	3	18098	IKBKE,IKBKB,CHUK
GO:MF	protein kinase C inhibitor activity	GO:0008426	0.020757146	1.682832367	3	617	3	18098	YWHAG,SFN,HSPB1
GO:MF	single-stranded 3'-5' DNA helicase activity	GO:1990518	0.020757146	1.682832367	3	617	3	18098	MCM7,DHX9,MCM6
GO:MF	RNA polymerase II general transcription initiation factor binding	GO:0001091	0.020769171	1.682580828	20	617	6	18098	GTF2E2,TP53,ESR1,AR,TBP,RUVBL2
GO:MF	thyroid hormone receptor binding	GO:0046966	0.022084313	1.655916099	29	617	7	18098	TACC1,NCOR1,NCOA3,NCOA6,GTF2B,NR0B2,FUS
GO:MF	RNA polymerase II general transcription initiation factor activity	GO:0016251	0.024446697	1.611779804	13	617	5	18098	GTF2E2,TBP,GTF2B,GTF2F1,TAF1
GO:MF	molecular function regulator	GO:0098772	0.026723714	1.573103184	1827	617	93	18098	CMTM8,SERPINA6,NBL1,PRKCD,TSLP,BAG3,TRIB1,IL17B,PLXNB1,CD320,GRM3,TIAM2,TGFB3,SAA2,CYTH2,RAF1,SGK1,WNT7A,SLN,CACNG6,CDKN2A,MYOZ1,FGD5,VEGFA,TP53,ESR1,EGFR,JUN,YWHAG,IKBKE,PIK3R1,AKT1,SMAD4,PCNA,YWHAE,NPM1,PPP2R2B,PPP2R1A,SUMO1,NCK1,FLNA,DAXX,CDKN1A,PRKCZ,XRCC5,MAP3K14,APP,SFN,ESR2,MAPK8,APC,VAV1,CAV1,HSP90AA1,CHM,YWHAH,CDK4,BCL2,ARRB1,FN1,CDC37,SET,NEDD4,CCND1,PRKCB,BCR,PAK2,VCP,PRKCE,MAPT,GH1,EE…
GO:MF	integrin binding	GO:0005178	0.036140073	1.44201098	137	617	15	18098	COMP,C9ORF47,SRC,EGFR,PRKCA,LYN,SYK,FN1,ILK,MYH9,ACTN1,HMGB1,ITGB1,KDR,ITGB3
GO:MF	sequence-specific single stranded DNA binding	GO:0098847	0.036963122	1.432231354	14	617	5	18098	TERF1,TERF2,HNRPA1,PCBP1,RPA2
GO:MF	SUMO transferase activity	GO:0019789	0.037718972	1.423440157	22	617	6	18098	CDKN2A,NSMCE2,MDM2,UBE2I,HDAC4,TRIM28
GO:MF	histone acetyltransferase activity	GO:0004402	0.039148471	1.40728519	66	617	10	18098	EP300,CREBBP,NCOA1,NCOA3,HTATIP,ATF2,GTF2B,TAF9,KAT2B,TAF1
GO:MF	damaged DNA binding	GO:0003684	0.039148471	1.40728519	66	617	10	18098	EP300,CREBBP,BRCA1,PCNA,H2AFX,XRCC5,DDB1,XRCC6,HMGB1,RPA2
GO:MF	phosphoserine residue binding	GO:0050815	0.044179863	1.354775638	8	617	4	18098	YWHAB,YWHAE,PIN1,NEDD4
GO:MF	nitric-oxide synthase regulator activity	GO:0030235	0.044179863	1.354775638	8	617	4	18098	ESR1,EGFR,AKT1,HSP90AA1
GO:MF	primary miRNA binding	GO:0070878	0.044179863	1.354775638	8	617	4	18098	SMAD3,SMAD2,SMAD1,SRF
GO:MF	transcription coactivator binding	GO:0001223	0.049568514	1.304794098	23	617	6	18098	RORC,ESR1,RELA,CDK9,CREB1,PPARA
GO:BP	cellular response to organic substance	GO:0071310	3.26E-85	84.48630539	2788	618	304	17847	RORC,LPIN2,UBE2D3,COL2A1,MT1G,HFE2,PTPN6,ANKRD1,COMP,NR1H2,RUFY4,CSDA,ATP6V1B2,PHIP,RAB8A,FHL2,NBL1,SIRT2,PRKCD,TSLP,NR4A1,BAG3,RYR1,TRIB1,PSMC2,IL13RA1,MYOCD,ADIPOR2,MIR99A,MEN1,HFE,ACACA,MT2A,TGFB3,RXRA,CLDN5,FOLR1,CHRNA4,RPS6KA2,FLNB,ASNS,IRF5,FGG,SYNGR1,H2AFZ,RUNX2,FOS,RUNX1,SOX11,RAF1,WNT7A,ACTA1,DDX18,RAE1,TPR,PSMA5,CTDSP2,UBA52,VEGFA,UBC,TP53,YWHAZ,ESR1,GRB2,SRC,EP300,CREBBP,TRAF6,HDAC1,MY…
GO:BP	positive regulation of metabolic process	GO:0009893	9.79E-79	78.0094167	3676	618	340	17847	RORC,TPCN1,LPIN2,TMEM119,PSRC1,NFE2,AIMP2,HFE2,ANKRD1,NR1H2,CDC123,RUFY4,CSDA,PFKFB4,DUX4,MFAP2,PHIP,FHL2,NIPBL,SIRT2,PRKCD,TSLP,NR4A1,BAG3,TRIB1,PSMC2,PLA2G2A,MYOCD,TXN,MYOM1,ADIPOR2,MEN1,HFE,COX17,ACACA,RFC4,TOP2A,TGFB3,RXRA,CLDN5,APLNR,SCD,RPS6KA2,RAB1B,AATF,TNNI2,IRF5,EPAS1,VEZF1,TACC1,FGG,H2AFZ,RUNX2,FOS,RUNX1,SOX11,RAF1,MAGED1,WNT7A,SLN,MIR210,ACTA1,CDKN2A,UBA52,VEGFA,UBC,TP53,ESR1,GRB2,SRC…
GO:BP	cellular response to chemical stimulus	GO:0070887	4.31E-78	77.3658776	3364	618	324	17847	RORC,LPIN2,UBE2D3,COL2A1,MT1G,HFE2,PTPN6,ANKRD1,COMP,NR1H2,RUFY4,CSDA,ATP6V1B2,PHIP,RAB8A,FHL2,NBL1,SIRT2,PRKCD,TSLP,NR4A1,BAG3,RYR1,TRIB1,PSMC2,IL13RA1,MYOCD,TXN,ADIPOR2,MIR99A,MEN1,HFE,ACACA,MT2A,TGFB3,RXRA,SAA2,CLDN5,FOLR1,CHRNA4,RPS6KA2,HBG1,FLNB,ASNS,IRF5,EPAS1,FGG,SYNGR1,H2AFZ,PIP5K1C,RUNX2,FOS,RUNX1,SOX11,RAF1,WNT7A,MIR210,ACTA1,DDX18,RAE1,TPR,PSMA5,CTDSP2,UBA52,VEGFA,UBC,TP53,YWHAZ,ESR1,G…
GO:BP	response to organic substance	GO:0010033	5.80E-78	77.2365556	3388	618	325	17847	RORC,LPIN2,UBE2D3,COL2A1,MT1G,HFE2,PTPN6,ANKRD1,COMP,NR1H2,RUFY4,CSDA,ATP6V1B2,PHIP,RAB8A,FHL2,NBL1,SIRT2,PRKCD,TSLP,S100P,NR4A1,BAG3,RYR1,SNRPN,TRIB1,PSMC2,IL13RA1,MYOCD,ADIPOR2,MIR99A,MEN1,HFE,ACACA,HSPB7,MT2A,SLC3A2,TGFB3,RXRA,CLDN5,SCD,FOLR1,CHRNA4,RPS6KA2,FLNB,ASNS,IRF5,TMUB1,MB,FGG,SYNGR1,H2AFZ,RUNX2,FOS,RUNX1,SOX11,RAF1,WNT7A,ACTA1,DDX18,RAE1,TPR,PSMA5,AMPD1,CTDSP2,UBA52,VEGFA,UBC,TP53,YWH…
GO:BP	positive regulation of macromolecule metabolic process	GO:0010604	1.19E-77	76.92266715	3397	618	325	17847	RORC,LPIN2,TMEM119,PSRC1,NFE2,AIMP2,HFE2,ANKRD1,NR1H2,CDC123,CSDA,DUX4,PHIP,FHL2,NIPBL,SIRT2,PRKCD,TSLP,NR4A1,TRIB1,PSMC2,PLA2G2A,MYOCD,TXN,MYOM1,MEN1,HFE,RFC4,TOP2A,TGFB3,RXRA,CLDN5,APLNR,RPS6KA2,RAB1B,AATF,TNNI2,IRF5,EPAS1,VEZF1,TACC1,FGG,H2AFZ,RUNX2,FOS,RUNX1,SOX11,RAF1,MAGED1,WNT7A,ACTA1,CDKN2A,UBA52,VEGFA,UBC,TP53,ESR1,SRC,EP300,CREBBP,TRAF6,HDAC1,MYC,AR,EGFR,SMAD3,JUN,SMAD2,BRCA1,IKBKG,CSNK…
GO:BP	positive regulation of nitrogen compound metabolic process	GO:0051173	2.36E-74	73.62798681	3209	618	311	17847	RORC,LPIN2,TMEM119,PSRC1,NFE2,AIMP2,HFE2,ANKRD1,NR1H2,CDC123,CSDA,PFKFB4,DUX4,PHIP,FHL2,NIPBL,SIRT2,PRKCD,TSLP,NR4A1,TRIB1,PSMC2,PLA2G2A,MYOCD,TXN,MEN1,HFE,RFC4,TOP2A,TGFB3,RXRA,APLNR,RAB1B,AATF,TNNI2,IRF5,EPAS1,VEZF1,TACC1,FGG,H2AFZ,RUNX2,FOS,RUNX1,SOX11,RAF1,MAGED1,WNT7A,CDKN2A,UBA52,VEGFA,UBC,TP53,ESR1,SRC,EP300,CREBBP,TRAF6,HDAC1,MYC,AR,EGFR,SMAD3,JUN,SMAD2,BRCA1,IKBKG,CSNK2A1,CTNNB1,MAPK1,PI…
GO:BP	positive regulation of cellular metabolic process	GO:0031325	7.28E-73	72.13809996	3353	618	316	17847	RORC,TPCN1,LPIN2,TMEM119,PSRC1,NFE2,AIMP2,HFE2,ANKRD1,NR1H2,CDC123,RUFY4,CSDA,PFKFB4,DUX4,PHIP,FHL2,NIPBL,SIRT2,PRKCD,TSLP,NR4A1,BAG3,TRIB1,PSMC2,PLA2G2A,MYOCD,TXN,MEN1,HFE,COX17,ACACA,RFC4,TOP2A,TGFB3,RXRA,APLNR,RAB1B,AATF,TNNI2,IRF5,EPAS1,VEZF1,TACC1,FGG,H2AFZ,RUNX2,FOS,RUNX1,SOX11,RAF1,MAGED1,WNT7A,MIR210,CDKN2A,UBA52,VEGFA,UBC,TP53,ESR1,GRB2,SRC,EP300,CREBBP,TRAF6,HDAC1,MYC,AR,EGFR,SMAD3,JUN,…
GO:BP	positive regulation of cellular process	GO:0048522	1.02E-66	65.99050487	5515	618	401	17847	RNF220,RORC,TPCN1,LPIN2,TMEM119,PSRC1,NFE2,AIMP2,PRAMEF6,UBE2D3,HFE2,PTPN6,ANKRD1,ATP6AP2,COMP,NR1H2,CDC123,RUFY4,CSDA,NPHP1,PFKFB4,EFNB1,DUX4,PHIP,FHL2,NIPBL,NBL1,SIRT2,PRKCD,TSLP,NR4A1,BAG3,TRIB1,BOC,ESPN,PSMC2,PLA2G2A,PRAMEF10,PLXNB1,CD320,MYOCD,TXN,MYOM1,TUBB2B,MEN1,HFE,TIAM2,COX17,S100A4,ACACA,RFC4,TOP2A,TGFB3,RXRA,NEK6,CLDN5,APLNR,C9ORF47,RPS6KA2,RAB1B,AATF,TNNI2,ASNS,IRF5,EPAS1,VEZF1,TACC1…
GO:BP	response to endogenous stimulus	GO:0009719	8.09E-66	65.09195402	1736	618	217	17847	RORC,LPIN2,UBE2D3,COL2A1,HFE2,ANKRD1,COMP,NR1H2,ATP6V1B2,PHIP,RAB8A,FHL2,NBL1,SIRT2,PRKCD,NR4A1,RYR1,SNRPN,MYOCD,ADIPOR2,MEN1,HFE,ACACA,TGFB3,RXRA,CLDN5,FOLR1,CHRNA4,ASNS,MB,H2AFZ,RUNX2,FOS,RUNX1,SOX11,WNT7A,ACTA1,DDX18,TPR,UBA52,UBC,TP53,ESR1,GRB2,SRC,EP300,CREBBP,HDAC1,AR,EGFR,SMAD3,JUN,SMAD2,BRCA1,YWHAG,CTNNB1,MAPK1,PIK3R1,FYN,MDM2,ABL1,AKT1,NR3C1,RB1,ACTB,RELA,SP1,HDAC2,SMAD4,NFKB1,STAT3,PRKA…
GO:BP	cellular response to endogenous stimulus	GO:0071495	1.68E-65	64.77451599	1465	618	199	17847	RORC,LPIN2,UBE2D3,COL2A1,HFE2,ANKRD1,COMP,NR1H2,ATP6V1B2,PHIP,RAB8A,FHL2,NBL1,SIRT2,PRKCD,NR4A1,RYR1,MYOCD,ADIPOR2,MEN1,HFE,ACACA,TGFB3,RXRA,CLDN5,FOLR1,CHRNA4,ASNS,H2AFZ,RUNX2,FOS,RUNX1,SOX11,WNT7A,ACTA1,DDX18,UBA52,UBC,TP53,ESR1,GRB2,SRC,EP300,CREBBP,HDAC1,AR,EGFR,SMAD3,JUN,SMAD2,BRCA1,YWHAG,CTNNB1,MAPK1,PIK3R1,FYN,MDM2,ABL1,AKT1,NR3C1,RB1,ACTB,RELA,SP1,HDAC2,SMAD4,NFKB1,STAT3,PRKACA,UBB,RARA,M…
GO:BP	apoptotic process	GO:0006915	1.96E-64	63.70713732	2013	618	232	17847	TMEM219,CIDEC,AIMP2,PRAMEF6,UBE2D3,COL2A1,PTPN6,ANKRD1,COMP,CSDA,DUX4,PHIP,FHL2,SIRT2,PRKCD,TSLP,NR4A1,BAG3,PRAMEF10,MYOCD,TIAM2,TOP2A,MRPS30,TGFB3,NEK6,RPS6KA2,AATF,ASNS,IRF5,FGG,ATP2A1,RAF1,SGK1,MAGED1,WNT7A,MIR210,CDKN2A,DAD1,UBA52,VEGFA,UBC,TP53,YWHAZ,ESR1,SRC,EP300,CREBBP,TRAF6,HDAC1,MYC,AR,EGFR,SMAD3,JUN,BRCA1,IKBKG,CSNK2A1,YWHAG,CTNNB1,MAPK1,IKBKE,PIK3R1,FYN,MDM2,ABL1,AKT1,NR3C1,RB1,PRKCA,…
GO:BP	positive regulation of macromolecule biosynthetic process	GO:0010557	4.38E-64	63.35899321	1904	618	225	17847	RORC,LPIN2,PSRC1,NFE2,HFE2,ANKRD1,NR1H2,CDC123,CSDA,DUX4,PHIP,FHL2,NIPBL,SIRT2,NR4A1,PSMC2,MYOCD,MEN1,RFC4,TOP2A,TGFB3,RXRA,AATF,TNNI2,IRF5,EPAS1,VEZF1,TACC1,H2AFZ,RUNX2,FOS,RUNX1,SOX11,RAF1,MAGED1,WNT7A,CDKN2A,UBA52,VEGFA,UBC,TP53,ESR1,SRC,EP300,CREBBP,TRAF6,HDAC1,MYC,AR,EGFR,SMAD3,JUN,SMAD2,BRCA1,IKBKG,CTNNB1,MAPK1,PIK3R1,ABL1,AKT1,NR3C1,RB1,RELA,SP1,HDAC2,SMAD4,NFKB1,STAT3,UBB,RARA,PCNA,VHL,MA…
GO:BP	cell death	GO:0008219	4.77E-63	62.32111727	2290	618	246	17847	TMEM219,CIDEC,AIMP2,PRAMEF6,UBE2D3,COL2A1,PTPN6,ANKRD1,COMP,CSDA,PMP22,DUX4,PHIP,FHL2,SIRT2,PRKCD,TSLP,NR4A1,BAG3,PRAMEF10,MYOCD,TXN,TIAM2,TOP2A,MRPS30,TGFB3,NEK6,RPS6KA2,AATF,ASNS,IRF5,FGG,FOS,SOX11,ATP2A1,RAF1,SGK1,MAGED1,WNT7A,MIR210,CDKN2A,DAD1,UBA52,VEGFA,UBC,TP53,YWHAZ,ESR1,SRC,EP300,CREBBP,TRAF6,HDAC1,MYC,AR,EGFR,SMAD3,JUN,BRCA1,IKBKG,CSNK2A1,YWHAG,CTNNB1,MAPK1,IKBKE,PIK3R1,FYN,MDM2,ABL1,A…
GO:BP	positive regulation of nucleobase-containing compound metabolic process	GO:0045935	1.06E-62	61.97580308	1886	618	222	17847	RORC,LPIN2,PSRC1,NFE2,HFE2,ANKRD1,NR1H2,PFKFB4,DUX4,PHIP,FHL2,NIPBL,SIRT2,PRKCD,NR4A1,PSMC2,MYOCD,MEN1,RFC4,TOP2A,TGFB3,RXRA,AATF,TNNI2,IRF5,EPAS1,VEZF1,TACC1,H2AFZ,RUNX2,FOS,RUNX1,SOX11,RAF1,MAGED1,WNT7A,CDKN2A,UBA52,VEGFA,UBC,TP53,ESR1,SRC,EP300,CREBBP,TRAF6,HDAC1,MYC,AR,EGFR,SMAD3,JUN,SMAD2,BRCA1,IKBKG,CTNNB1,MAPK1,PIK3R1,ABL1,AKT1,NR3C1,RB1,RELA,SP1,HDAC2,SMAD4,NFKB1,STAT3,UBB,RARA,PCNA,VHL,M…
GO:BP	programmed cell death	GO:0012501	5.86E-62	61.23219855	2159	618	237	17847	TMEM219,CIDEC,AIMP2,PRAMEF6,UBE2D3,COL2A1,PTPN6,ANKRD1,COMP,CSDA,DUX4,PHIP,FHL2,SIRT2,PRKCD,TSLP,NR4A1,BAG3,PRAMEF10,MYOCD,TIAM2,TOP2A,MRPS30,TGFB3,NEK6,RPS6KA2,AATF,ASNS,IRF5,FGG,ATP2A1,RAF1,SGK1,MAGED1,WNT7A,MIR210,CDKN2A,DAD1,UBA52,VEGFA,UBC,TP53,YWHAZ,ESR1,SRC,EP300,CREBBP,TRAF6,HDAC1,MYC,AR,EGFR,SMAD3,JUN,BRCA1,IKBKG,CSNK2A1,YWHAG,CTNNB1,MAPK1,IKBKE,PIK3R1,FYN,MDM2,ABL1,AKT1,NR3C1,RB1,PRKCA,…
GO:BP	negative regulation of cellular process	GO:0048523	8.60E-62	61.0653591	4914	618	369	17847	RORC,TPCN1,TMEM119,SERPINA6,PSRC1,JSRP1,AIMP2,PRAMEF6,UBE2D3,COL2A1,HFE2,PTPN6,STK38,ANKRD1,COMP,NR1H2,CDC123,CSDA,PMP22,DUX4,PHIP,FHL2,NIPBL,NBL1,PPFIA1,SIRT2,PRKCD,TSLP,NR4A1,BAG3,RYR1,TRIB1,ESPN,PSMC2,MYL2,PLA2G2A,PRAMEF10,PLXNB1,MYOCD,TXN,ADIPOR2,MIR99A,MEN1,HFE,TOP2A,BHLHB3,ZNF93,TGFB3,RXRA,CLDN5,APLNR,C9ORF47,RPS6KA2,AATF,ASNS,RPS26,FGG,RUNX2,RUNX1,SOX11,RAF1,MAGED1,WNT7A,SLN,MIR210,CDKN2A,…
GO:BP	response to chemical	GO:0042221	3.43E-61	60.46509713	4841	618	365	17847	RORC,LPIN2,CMTM8,UBE2D3,COL2A1,MT1G,SLC13A5,HFE2,PTPN6,ANKRD1,COMP,OR4F17,NR1H2,RUFY4,CSDA,EFNB1,ATP6V1B2,PHIP,RAB8A,FHL2,NBL1,SIRT2,PRKCD,TSLP,S100P,NR4A1,BAG3,RYR1,SNRPN,TRIB1,BOC,PSMC2,IL13RA1,PLXNB1,CD320,MYOCD,TXN,TUBB2B,ADIPOR2,MIR99A,MEN1,HFE,ACACA,HSPB7,MT2A,SLC3A2,TGFB3,RXRA,SLC25A22,SAA2,CLDN5,SCD,FOLR1,SLC36A2,CHRNA4,RPS6KA2,HBG1,FLNB,ASNS,IRF5,EPAS1,TMUB1,MB,FGG,SYNGR1,H2AFZ,PIP5K1C,R…
GO:BP	positive regulation of biosynthetic process	GO:0009891	8.34E-61	60.07860836	2032	618	228	17847	RORC,LPIN2,PSRC1,NFE2,HFE2,ANKRD1,NR1H2,CDC123,CSDA,DUX4,PHIP,FHL2,NIPBL,SIRT2,PRKCD,NR4A1,PSMC2,MYOCD,MEN1,RFC4,TOP2A,TGFB3,RXRA,AATF,TNNI2,IRF5,EPAS1,VEZF1,TACC1,H2AFZ,RUNX2,FOS,RUNX1,SOX11,RAF1,MAGED1,WNT7A,CDKN2A,UBA52,VEGFA,UBC,TP53,ESR1,SRC,EP300,CREBBP,TRAF6,HDAC1,MYC,AR,EGFR,SMAD3,JUN,SMAD2,BRCA1,IKBKG,CTNNB1,MAPK1,PIK3R1,ABL1,AKT1,NR3C1,RB1,RELA,SP1,HDAC2,SMAD4,NFKB1,STAT3,UBB,RARA,PCNA,…
GO:BP	positive regulation of cellular biosynthetic process	GO:0031328	8.44E-61	60.0735232	1998	618	226	17847	RORC,LPIN2,PSRC1,NFE2,HFE2,ANKRD1,NR1H2,CDC123,CSDA,DUX4,PHIP,FHL2,NIPBL,SIRT2,PRKCD,NR4A1,PSMC2,MYOCD,MEN1,RFC4,TOP2A,TGFB3,RXRA,AATF,TNNI2,IRF5,EPAS1,VEZF1,TACC1,H2AFZ,RUNX2,FOS,RUNX1,SOX11,RAF1,MAGED1,WNT7A,CDKN2A,UBA52,VEGFA,UBC,TP53,ESR1,SRC,EP300,CREBBP,TRAF6,HDAC1,MYC,AR,EGFR,SMAD3,JUN,SMAD2,BRCA1,IKBKG,CTNNB1,MAPK1,PIK3R1,ABL1,AKT1,NR3C1,RB1,RELA,SP1,HDAC2,SMAD4,NFKB1,STAT3,UBB,RARA,PCNA,…
GO:BP	positive regulation of biological process	GO:0048518	3.24E-60	59.48895734	6290	618	420	17847	RNF220,RORC,TPCN1,LPIN2,TMEM119,PSRC1,NFE2,AIMP2,PRAMEF6,UBE2D3,HFE2,PTPN6,ANKRD1,ATP6AP2,COMP,NR1H2,CDC123,RUFY4,CSDA,CEP250,NPHP1,PFKFB4,EFNB1,DUX4,MFAP2,PHIP,FHL2,NIPBL,NBL1,SIRT2,PRKCD,TSLP,NR4A1,BAG3,TRIB1,BOC,IL17B,ESPN,PSMC2,PLA2G2A,PRAMEF10,PLXNB1,CD320,MYOCD,TXN,MYOM1,TUBB2B,ADIPOR2,MEN1,HFE,TIAM2,COX17,S100A4,ACACA,RFC4,TOP2A,TGFB3,RXRA,NEK6,CLDN5,APLNR,SCD,C9ORF47,RPS6KA2,RAB1B,AATF,TN…
GO:BP	regulation of nitrogen compound metabolic process	GO:0051171	5.70E-59	58.24397516	5916	618	404	17847	RORC,LPIN2,TMEM119,SERPINA6,TMEM14C,PSRC1,NFE2,AIMP2,PRAMEF6,UBE2D3,HFE2,PTPN6,STK38,ANKRD1,ATP6AP2,COMP,NR1H2,CDC123,CSDA,PFKFB4,DUX4,PHIP,FHL2,NIPBL,EXOSC1,NBL1,SIRT2,PRKCD,TSLP,NR4A1,BAG3,TRIB1,PSMC2,PLA2G2A,PRAMEF10,ZMYM6,MYOCD,TXN,MEN1,HFE,RFC4,TOP2A,BHLHB3,ZNF93,ZNF135,TGFB3,RXRA,APLNR,RPS6KA2,RAB1B,AATF,TNNI2,IRF5,EPAS1,VEZF1,RPS26,TACC1,FGG,H2AFZ,RUNX2,FOS,RUNX1,SOX11,RAF1,SGK1,MAGED1,WNT…
GO:BP	regulation of cell death	GO:0010941	7.11E-59	58.14840915	1760	618	209	17847	TMEM219,AIMP2,PRAMEF6,COL2A1,ANKRD1,COMP,CSDA,PHIP,FHL2,SIRT2,PRKCD,TSLP,NR4A1,BAG3,PRAMEF10,MYOCD,TXN,TIAM2,TOP2A,TGFB3,RPS6KA2,AATF,ASNS,IRF5,FGG,FOS,SOX11,RAF1,SGK1,MAGED1,WNT7A,MIR210,CDKN2A,DAD1,UBA52,VEGFA,UBC,TP53,YWHAZ,ESR1,SRC,CREBBP,TRAF6,HDAC1,MYC,AR,EGFR,SMAD3,JUN,BRCA1,IKBKG,CSNK2A1,YWHAG,CTNNB1,PIK3R1,FYN,MDM2,ABL1,AKT1,RB1,PRKCA,RELA,HDAC2,SMAD4,NFKB1,STAT3,UBB,RARA,VHL,PRKDC,PLCG1…
GO:BP	positive regulation of gene expression	GO:0010628	1.24E-58	57.9054504	2017	618	224	17847	RORC,LPIN2,TMEM119,PSRC1,NFE2,HFE2,NR1H2,CDC123,CSDA,DUX4,PHIP,FHL2,NIPBL,SIRT2,NR4A1,PSMC2,MYOCD,MYOM1,MEN1,HFE,TOP2A,TGFB3,RXRA,CLDN5,RPS6KA2,AATF,TNNI2,IRF5,EPAS1,VEZF1,H2AFZ,RUNX2,FOS,RUNX1,SOX11,RAF1,MAGED1,WNT7A,ACTA1,CDKN2A,UBA52,VEGFA,UBC,TP53,ESR1,SRC,EP300,CREBBP,TRAF6,HDAC1,MYC,AR,EGFR,SMAD3,JUN,SMAD2,BRCA1,IKBKG,CTNNB1,MAPK1,PIK3R1,MDM2,ABL1,AKT1,NR3C1,RB1,ACTB,RELA,SP1,HDAC2,SMAD4,NF…
GO:BP	regulation of primary metabolic process	GO:0080090	6.01E-58	57.22122713	6094	618	409	17847	RORC,LPIN2,TMEM119,SERPINA6,PSRC1,NFE2,AIMP2,PRAMEF6,UBE2D3,HFE2,PTPN6,STK38,ANKRD1,ATP6AP2,COMP,NR1H2,CDC123,CSDA,PFKFB4,DUX4,PHIP,FHL2,NIPBL,EXOSC1,NBL1,SIRT2,PRKCD,TSLP,NR4A1,BAG3,TRIB1,PSMC2,PLA2G2A,PRAMEF10,ZMYM6,MYOCD,TXN,ADIPOR2,MEN1,HFE,TIAM2,ACACA,RFC4,TOP2A,BHLHB3,ZNF93,ZNF135,TGFB3,RXRA,APLNR,SCD,RPS6KA2,RAB1B,AATF,TNNI2,IRF5,EPAS1,VEZF1,RPS26,TACC1,FGG,H2AFZ,RUNX2,FOS,RUNX1,SOX11,RAF1…
GO:BP	regulation of cellular metabolic process	GO:0031323	6.75E-58	57.17098564	6285	618	416	17847	RORC,TPCN1,LPIN2,TMEM119,SERPINA6,TMEM14C,PSRC1,NFE2,AIMP2,PRAMEF6,UBE2D3,HFE2,PTPN6,STK38,ANKRD1,ATP6AP2,COMP,NR1H2,CDC123,RUFY4,CSDA,PFKFB4,DUX4,ATP6V1B2,PHIP,RAB8A,FHL2,NIPBL,EXOSC1,NBL1,SIRT2,PRKCD,TSLP,NR4A1,BAG3,TRIB1,PSMC2,PLA2G2A,PRAMEF10,ZMYM6,MYOCD,TXN,ADIPOR2,MEN1,HFE,COX17,ACACA,RFC4,TOP2A,BHLHB3,ZNF93,ZNF135,TGFB3,RXRA,APLNR,RAB1B,AATF,TNNI2,IRF5,EPAS1,VEZF1,RPS26,TACC1,FGG,H2AFZ,RUN…
GO:BP	cellular response to stress	GO:0033554	1.89E-57	56.72433973	2064	618	225	17847	UBE2D3,ANKRD1,CSDA,NIPBL,SIRT2,PRKCD,BAG3,TRIB1,PSMC2,TXN,MEN1,HFE,MRPS11,RFC4,TOP2A,NEK6,FOLR1,CHRNA4,AATF,ASNS,EPAS1,TMUB1,FOS,ATP2A1,SGK1,UBA1,WNT7A,MIR210,CDKN2A,RAE1,TPR,PSMA5,CTDSP2,UBA52,NSMCE2,VEGFA,UBC,TP53,GRB2,SRC,EP300,CREBBP,TRAF6,MYC,EGFR,JUN,BRCA1,IKBKG,CTNNB1,MAPK1,IKBKE,PIK3R1,FYN,MDM2,ABL1,AKT1,RELA,HDAC2,NFKB1,PRKACA,UBB,PCNA,VHL,MAPK3,PTPN11,PRKDC,NCOR1,CBL,SHC1,SIN3A,RPS27A,H…
GO:BP	regulation of programmed cell death	GO:0043067	4.01E-57	56.3965081	1638	618	199	17847	TMEM219,PRAMEF6,COL2A1,ANKRD1,COMP,CSDA,PHIP,FHL2,SIRT2,PRKCD,TSLP,NR4A1,BAG3,PRAMEF10,MYOCD,TIAM2,TOP2A,TGFB3,RPS6KA2,AATF,ASNS,IRF5,FGG,RAF1,SGK1,MAGED1,WNT7A,MIR210,CDKN2A,DAD1,UBA52,VEGFA,UBC,TP53,YWHAZ,ESR1,SRC,CREBBP,TRAF6,HDAC1,MYC,AR,EGFR,SMAD3,JUN,BRCA1,CSNK2A1,YWHAG,CTNNB1,PIK3R1,FYN,MDM2,ABL1,AKT1,RB1,PRKCA,RELA,HDAC2,NFKB1,STAT3,UBB,RARA,VHL,PRKDC,PLCG1,LCK,CBL,SHC1,YWHAQ,YWHAB,SIN3A,…
GO:BP	regulation of nucleobase-containing compound metabolic process	GO:0019219	5.43E-57	56.26546631	4050	618	324	17847	RORC,LPIN2,PSRC1,NFE2,PRAMEF6,UBE2D3,HFE2,ANKRD1,COMP,NR1H2,CSDA,PFKFB4,DUX4,PHIP,FHL2,NIPBL,EXOSC1,NBL1,SIRT2,PRKCD,NR4A1,BAG3,TRIB1,PSMC2,PRAMEF10,ZMYM6,MYOCD,TXN,MEN1,HFE,RFC4,TOP2A,BHLHB3,ZNF93,ZNF135,TGFB3,RXRA,AATF,TNNI2,IRF5,EPAS1,VEZF1,RPS26,TACC1,H2AFZ,RUNX2,FOS,RUNX1,SOX11,RAF1,SGK1,MAGED1,WNT7A,CDKN2A,RAE1,ZNF213,RALY,TPR,PSMA5,MYOZ1,CTDSP2,UBA52,VEGFA,UBC,TP53,YWHAZ,ESR1,SRC,EP300,CRE…
GO:BP	regulation of response to stimulus	GO:0048583	6.02E-57	56.22008387	4370	618	338	17847	RNF220,JSRP1,UBE2D3,COL2A1,HFE2,PTPN6,STK38,ANKRD1,ATP6AP2,NR1H2,CSDA,SIGLEC10,PHIP,FHL2,NBL1,SIRT2,PRKCD,TSLP,BAG3,TRIB1,IL17B,PSMC2,PLA2G2A,PLXNB1,CD8B,MYOCD,TXN,TUBB2B,MIR99A,MEN1,HFE,TIAM2,S100A4,RFC4,TGFB3,NEK6,APLNR,FOLR1,CHRNA4,AATF,KIR2DL3,FGG,PIP5K1C,CYTH2,RUNX2,MYH7,FOS,RUNX1,SOX11,RAF1,MAGED1,WNT7A,MIR210,CDKN2A,RAE1,SYNPO2L,TPR,PSMA5,MYOZ1,FGD5,UBA52,VEGFA,UBC,TP53,YWHAZ,ESR1,GRB2,SRC…
GO:BP	regulation of apoptotic process	GO:0042981	1.63E-55	54.78795609	1610	618	195	17847	TMEM219,PRAMEF6,COL2A1,ANKRD1,COMP,CSDA,PHIP,FHL2,SIRT2,PRKCD,TSLP,NR4A1,BAG3,PRAMEF10,MYOCD,TIAM2,TOP2A,TGFB3,RPS6KA2,AATF,ASNS,IRF5,FGG,RAF1,SGK1,MAGED1,WNT7A,MIR210,CDKN2A,DAD1,UBA52,VEGFA,UBC,TP53,YWHAZ,ESR1,SRC,CREBBP,TRAF6,HDAC1,MYC,AR,EGFR,SMAD3,JUN,BRCA1,CSNK2A1,YWHAG,CTNNB1,PIK3R1,FYN,MDM2,ABL1,AKT1,RB1,PRKCA,RELA,HDAC2,NFKB1,STAT3,UBB,RARA,VHL,PRKDC,PLCG1,LCK,CBL,SHC1,YWHAQ,YWHAB,SIN3A,…
GO:BP	regulation of metabolic process	GO:0019222	1.88E-55	54.72561771	6871	618	433	17847	RORC,TPCN1,LPIN2,TMEM119,SERPINA6,TMEM14C,PSRC1,NFE2,AIMP2,PRAMEF6,UBE2D3,COL2A1,HFE2,PTPN6,STK38,ANKRD1,ATP6AP2,COMP,NR1H2,CDC123,RUFY4,CSDA,PFKFB4,DUX4,MFAP2,ATP6V1B2,PHIP,RAB8A,FHL2,NIPBL,EXOSC1,NBL1,SIRT2,PRKCD,TSLP,NR4A1,BAG3,TRIB1,PSMC2,PLA2G2A,PRAMEF10,CD320,ZMYM6,MYOCD,TXN,MYOM1,ADIPOR2,MIR99A,MEN1,HFE,TIAM2,COX17,ACACA,RFC4,TOP2A,BHLHB3,ZNF93,ZNF135,TGFB3,RXRA,CLDN5,APLNR,SCD,RPS6KA2,RAB…
GO:BP	positive regulation of nucleic acid-templated transcription	GO:1903508	6.11E-55	54.21382195	1639	618	196	17847	RORC,LPIN2,PSRC1,NFE2,HFE2,ANKRD1,NR1H2,DUX4,PHIP,FHL2,NIPBL,SIRT2,NR4A1,PSMC2,MYOCD,MEN1,TOP2A,TGFB3,RXRA,AATF,TNNI2,IRF5,EPAS1,VEZF1,TACC1,H2AFZ,RUNX2,FOS,RUNX1,SOX11,RAF1,MAGED1,WNT7A,CDKN2A,UBA52,VEGFA,UBC,TP53,ESR1,SRC,EP300,CREBBP,TRAF6,HDAC1,MYC,AR,EGFR,SMAD3,JUN,SMAD2,BRCA1,IKBKG,CTNNB1,MAPK1,PIK3R1,ABL1,AKT1,NR3C1,RB1,RELA,SP1,HDAC2,SMAD4,NFKB1,STAT3,UBB,RARA,VHL,MAPK3,PRKDC,SHC1,SIN3A,R…
GO:BP	positive regulation of RNA biosynthetic process	GO:1902680	6.76E-55	54.16992302	1640	618	196	17847	RORC,LPIN2,PSRC1,NFE2,HFE2,ANKRD1,NR1H2,DUX4,PHIP,FHL2,NIPBL,SIRT2,NR4A1,PSMC2,MYOCD,MEN1,TOP2A,TGFB3,RXRA,AATF,TNNI2,IRF5,EPAS1,VEZF1,TACC1,H2AFZ,RUNX2,FOS,RUNX1,SOX11,RAF1,MAGED1,WNT7A,CDKN2A,UBA52,VEGFA,UBC,TP53,ESR1,SRC,EP300,CREBBP,TRAF6,HDAC1,MYC,AR,EGFR,SMAD3,JUN,SMAD2,BRCA1,IKBKG,CTNNB1,MAPK1,PIK3R1,ABL1,AKT1,NR3C1,RB1,RELA,SP1,HDAC2,SMAD4,NFKB1,STAT3,UBB,RARA,VHL,MAPK3,PRKDC,SHC1,SIN3A,R…
GO:BP	positive regulation of RNA metabolic process	GO:0051254	1.08E-54	53.96847605	1726	618	201	17847	RORC,LPIN2,PSRC1,NFE2,HFE2,ANKRD1,NR1H2,DUX4,PHIP,FHL2,NIPBL,SIRT2,NR4A1,PSMC2,MYOCD,MEN1,TOP2A,TGFB3,RXRA,AATF,TNNI2,IRF5,EPAS1,VEZF1,TACC1,H2AFZ,RUNX2,FOS,RUNX1,SOX11,RAF1,MAGED1,WNT7A,CDKN2A,UBA52,VEGFA,UBC,TP53,ESR1,SRC,EP300,CREBBP,TRAF6,HDAC1,MYC,AR,EGFR,SMAD3,JUN,SMAD2,BRCA1,IKBKG,CTNNB1,MAPK1,PIK3R1,ABL1,AKT1,NR3C1,RB1,RELA,SP1,HDAC2,SMAD4,NFKB1,STAT3,UBB,RARA,VHL,MAPK3,PRKDC,SHC1,SIN3A,R…
GO:BP	response to stress	GO:0006950	2.81E-54	53.55199526	4085	618	321	17847	LRRC8A,NFE2,UBE2D3,MT1G,PTPN6,ANKRD1,COMP,NR1H2,CSDA,MYH6,SIGLEC10,NIPBL,SIRT2,PRKCD,TSLP,BAG3,RYR1,TRIB1,TCAP,IL17B,PSMC2,PLA2G2A,MYOCD,TXN,ADIPOR2,MEN1,HFE,MRPS11,IFI44L,RFC4,HSPB7,TOP2A,MT2A,TGFB3,SAA2,NEK6,FOLR1,CHRNA4,C9ORF47,AATF,HBG1,FLNB,ASNS,IRF5,EPAS1,VEZF1,TMUB1,MB,FGG,MYH7,FOS,ATP2A1,RAF1,SGK1,UBA1,WNT7A,MIR210,FBXL20,CDKN2A,RAE1,TPR,PSMA5,MYOZ1,ALAS2,CTDSP2,UBA52,NSMCE2,VEGFA,UBC,TP5…
GO:BP	regulation of macromolecule metabolic process	GO:0060255	3.30E-54	53.48097623	6346	618	412	17847	RORC,LPIN2,TMEM119,SERPINA6,PSRC1,NFE2,AIMP2,PRAMEF6,UBE2D3,COL2A1,HFE2,PTPN6,STK38,ANKRD1,ATP6AP2,COMP,NR1H2,CDC123,CSDA,DUX4,PHIP,FHL2,NIPBL,EXOSC1,NBL1,SIRT2,PRKCD,TSLP,NR4A1,BAG3,TRIB1,PSMC2,PLA2G2A,PRAMEF10,ZMYM6,MYOCD,TXN,MYOM1,MIR99A,MEN1,HFE,RFC4,TOP2A,BHLHB3,ZNF93,ZNF135,TGFB3,RXRA,CLDN5,APLNR,RPS6KA2,RAB1B,AATF,TNNI2,IRF5,EPAS1,VEZF1,RPS26,TACC1,FGG,H2AFZ,RUNX2,FOS,RUNX1,SOX11,RAF1,SGK1…
GO:BP	transcription by RNA polymerase II	GO:0006366	5.43E-54	53.26492669	2428	618	240	17847	RORC,SNRPF,LPIN2,NFE2,UBE2D3,HFE2,ANKRD1,COMP,NR1H2,CSDA,DUX4,PHIP,FHL2,NIPBL,NBL1,SIRT2,NR4A1,BAG3,PSMC2,ZMYM6,MYOCD,TXN,MEN1,HFE,TOP2A,BHLHB3,TGFB3,RXRA,AATF,GTF2E2,IRF5,EPAS1,VEZF1,H2AFZ,RUNX2,FOS,RUNX1,SOX11,RAF1,MAGED1,WNT7A,CDKN2A,TPR,PSMA5,MYOZ1,CTDSP2,UBA52,VEGFA,UBC,TP53,ESR1,EP300,CREBBP,TRAF6,HDAC1,MYC,AR,EGFR,SMAD3,JUN,SMAD2,BRCA1,IKBKG,CTNNB1,PIK3R1,MDM2,ABL1,AKT1,NR3C1,RB1,RELA,SP1,…
GO:BP	regulation of macromolecule biosynthetic process	GO:0010556	1.50E-53	52.82460671	4113	618	321	17847	RORC,LPIN2,PSRC1,NFE2,PRAMEF6,UBE2D3,HFE2,ANKRD1,COMP,NR1H2,CDC123,CSDA,DUX4,PHIP,FHL2,NIPBL,NBL1,SIRT2,PRKCD,NR4A1,BAG3,TRIB1,PSMC2,PRAMEF10,ZMYM6,MYOCD,TXN,MEN1,HFE,RFC4,TOP2A,BHLHB3,ZNF93,ZNF135,TGFB3,RXRA,AATF,TNNI2,IRF5,EPAS1,VEZF1,TACC1,H2AFZ,RUNX2,FOS,RUNX1,SOX11,RAF1,SGK1,MAGED1,WNT7A,MIR210,CDKN2A,ZNF213,RALY,TPR,PSMA5,MYOZ1,CTDSP2,UBA52,VEGFA,UBC,TP53,ESR1,SRC,EP300,CREBBP,TRAF6,HDAC1,M…
GO:BP	regulation of signal transduction	GO:0009966	1.82E-53	52.74009113	3209	618	279	17847	RNF220,JSRP1,COL2A1,HFE2,PTPN6,STK38,ANKRD1,ATP6AP2,NR1H2,CSDA,PHIP,FHL2,NBL1,PRKCD,TSLP,TRIB1,PSMC2,PLA2G2A,PLXNB1,MYOCD,TXN,MIR99A,MEN1,HFE,TIAM2,S100A4,RFC4,TGFB3,NEK6,APLNR,FOLR1,AATF,FGG,PIP5K1C,CYTH2,RUNX2,RUNX1,SOX11,RAF1,MAGED1,WNT7A,MIR210,SYNPO2L,PSMA5,MYOZ1,FGD5,UBA52,VEGFA,UBC,TP53,YWHAZ,ESR1,GRB2,SRC,EP300,CREBBP,TRAF6,HDAC1,MYC,AR,EGFR,SMAD3,JUN,SMAD2,BRCA1,IKBKG,CSNK2A1,YWHAG,CTNNB…
GO:BP	negative regulation of biological process	GO:0048519	2.88E-53	52.53994391	5596	618	382	17847	RORC,TPCN1,TMEM119,SERPINA6,PSRC1,JSRP1,AIMP2,PRAMEF6,UBE2D3,COL2A1,MT1G,HFE2,PTPN6,STK38,ANKRD1,COMP,NR1H2,CDC123,CSDA,PMP22,DUX4,SIGLEC10,PHIP,FHL2,NIPBL,EXOSC1,NBL1,PPFIA1,SIRT2,PRKCD,TSLP,NR4A1,BAG3,RYR1,TRIB1,ESPN,PSMC2,MYL2,PLA2G2A,PRAMEF10,PLXNB1,MYOCD,TXN,ADIPOR2,MIR99A,MEN1,HFE,TOP2A,MT2A,BHLHB3,ZNF93,TGFB3,RXRA,CLDN5,APLNR,C9ORF47,RPS6KA2,AATF,ASNS,RPS26,FGG,RUNX2,RUNX1,SOX11,RAF1,MAGED…
GO:BP	regulation of transcription by RNA polymerase II	GO:0006357	1.79E-52	51.74755681	2269	618	229	17847	RORC,LPIN2,NFE2,UBE2D3,HFE2,ANKRD1,COMP,NR1H2,CSDA,DUX4,PHIP,FHL2,NIPBL,NBL1,SIRT2,NR4A1,BAG3,PSMC2,ZMYM6,MYOCD,TXN,MEN1,HFE,TOP2A,BHLHB3,TGFB3,RXRA,AATF,IRF5,EPAS1,VEZF1,H2AFZ,RUNX2,FOS,RUNX1,SOX11,RAF1,MAGED1,WNT7A,CDKN2A,TPR,PSMA5,MYOZ1,CTDSP2,UBA52,VEGFA,UBC,TP53,ESR1,EP300,CREBBP,TRAF6,HDAC1,MYC,AR,EGFR,SMAD3,JUN,SMAD2,BRCA1,IKBKG,CTNNB1,PIK3R1,MDM2,ABL1,AKT1,NR3C1,RB1,RELA,SP1,HDAC2,UBE2I,S…
GO:BP	positive regulation of transcription, DNA-templated	GO:0045893	2.21E-52	51.65505999	1537	618	186	17847	RORC,LPIN2,PSRC1,NFE2,HFE2,NR1H2,DUX4,PHIP,FHL2,NIPBL,SIRT2,NR4A1,PSMC2,MYOCD,MEN1,TOP2A,TGFB3,RXRA,AATF,TNNI2,IRF5,EPAS1,VEZF1,H2AFZ,RUNX2,FOS,RUNX1,SOX11,RAF1,MAGED1,WNT7A,CDKN2A,UBA52,VEGFA,UBC,TP53,ESR1,SRC,EP300,CREBBP,TRAF6,HDAC1,MYC,AR,EGFR,SMAD3,JUN,SMAD2,BRCA1,IKBKG,CTNNB1,MAPK1,PIK3R1,ABL1,AKT1,NR3C1,RB1,RELA,SP1,HDAC2,SMAD4,NFKB1,STAT3,UBB,RARA,VHL,MAPK3,PRKDC,SHC1,SIN3A,RPS27A,HDAC3,P…
GO:BP	regulation of RNA metabolic process	GO:0051252	4.04E-52	51.39382858	3789	618	304	17847	RORC,LPIN2,PSRC1,NFE2,PRAMEF6,UBE2D3,HFE2,ANKRD1,COMP,NR1H2,CSDA,DUX4,PHIP,FHL2,NIPBL,EXOSC1,NBL1,SIRT2,PRKCD,NR4A1,BAG3,TRIB1,PSMC2,PRAMEF10,ZMYM6,MYOCD,TXN,MEN1,HFE,TOP2A,BHLHB3,ZNF93,ZNF135,TGFB3,RXRA,AATF,TNNI2,IRF5,EPAS1,VEZF1,RPS26,TACC1,H2AFZ,RUNX2,FOS,RUNX1,SOX11,RAF1,SGK1,MAGED1,WNT7A,CDKN2A,ZNF213,RALY,TPR,PSMA5,MYOZ1,CTDSP2,UBA52,VEGFA,UBC,TP53,YWHAZ,ESR1,SRC,EP300,CREBBP,TRAF6,HDAC1,M…
GO:BP	regulation of signaling	GO:0023051	4.15E-52	51.3818748	3637	618	297	17847	RNF220,JSRP1,COL2A1,HFE2,PTPN6,STK38,ANKRD1,ATP6AP2,NR1H2,CSDA,PHIP,RAB8A,FHL2,NBL1,PRKCD,TSLP,RYR1,TRIB1,PSMC2,PLA2G2A,PLXNB1,GRM3,MYOCD,TXN,TUBB2B,MIR99A,MEN1,HFE,TIAM2,S100A4,RFC4,TGFB3,NEK6,APLNR,FOLR1,CHRNA4,AATF,GRIK4,FGG,SYNGR1,PIP5K1C,CYTH2,RUNX2,RUNX1,SOX11,ATP2A1,RAF1,MAGED1,WNT7A,MIR210,FBXL20,SYNPO2L,PSMA5,MYOZ1,FGD5,UBA52,VEGFA,UBC,TP53,YWHAZ,ESR1,GRB2,SRC,EP300,CREBBP,TRAF6,HDAC1,MY…
GO:BP	regulation of biosynthetic process	GO:0009889	7.39E-52	51.1310986	4340	618	328	17847	RORC,LPIN2,TMEM14C,PSRC1,NFE2,PRAMEF6,UBE2D3,HFE2,ANKRD1,COMP,NR1H2,CDC123,CSDA,DUX4,PHIP,FHL2,NIPBL,NBL1,SIRT2,PRKCD,NR4A1,BAG3,TRIB1,PSMC2,PRAMEF10,ZMYM6,MYOCD,TXN,ADIPOR2,MEN1,HFE,ACACA,RFC4,TOP2A,BHLHB3,ZNF93,ZNF135,TGFB3,RXRA,SCD,AATF,TNNI2,IRF5,EPAS1,VEZF1,TACC1,H2AFZ,RUNX2,FOS,RUNX1,SOX11,RAF1,SGK1,MAGED1,WNT7A,MIR210,CDKN2A,ZNF213,RALY,TPR,PSMA5,MYOZ1,CTDSP2,UBA52,VEGFA,UBC,TP53,ESR1,SRC,…
GO:BP	regulation of RNA biosynthetic process	GO:2001141	8.57E-52	51.06684724	3541	618	292	17847	RORC,LPIN2,PSRC1,NFE2,PRAMEF6,UBE2D3,HFE2,ANKRD1,COMP,NR1H2,CSDA,DUX4,PHIP,FHL2,NIPBL,NBL1,SIRT2,NR4A1,BAG3,TRIB1,PSMC2,PRAMEF10,ZMYM6,MYOCD,TXN,MEN1,HFE,TOP2A,BHLHB3,ZNF93,ZNF135,TGFB3,RXRA,AATF,TNNI2,IRF5,EPAS1,VEZF1,TACC1,H2AFZ,RUNX2,FOS,RUNX1,SOX11,RAF1,SGK1,MAGED1,WNT7A,CDKN2A,ZNF213,RALY,TPR,PSMA5,MYOZ1,CTDSP2,UBA52,VEGFA,UBC,TP53,ESR1,SRC,EP300,CREBBP,TRAF6,HDAC1,MYC,AR,EGFR,SMAD3,JUN,SMAD…
GO:BP	regulation of cellular biosynthetic process	GO:0031326	1.25E-51	50.90406947	4257	618	324	17847	RORC,LPIN2,TMEM14C,PSRC1,NFE2,PRAMEF6,UBE2D3,HFE2,ANKRD1,COMP,NR1H2,CDC123,CSDA,DUX4,PHIP,FHL2,NIPBL,NBL1,SIRT2,PRKCD,NR4A1,BAG3,TRIB1,PSMC2,PRAMEF10,ZMYM6,MYOCD,TXN,ADIPOR2,MEN1,HFE,RFC4,TOP2A,BHLHB3,ZNF93,ZNF135,TGFB3,RXRA,AATF,TNNI2,IRF5,EPAS1,VEZF1,TACC1,H2AFZ,RUNX2,FOS,RUNX1,SOX11,RAF1,SGK1,MAGED1,WNT7A,MIR210,CDKN2A,ZNF213,RALY,TPR,PSMA5,MYOZ1,CTDSP2,UBA52,VEGFA,UBC,TP53,ESR1,SRC,EP300,CREB…
GO:BP	regulation of cellular macromolecule biosynthetic process	GO:2000112	1.52E-51	50.81793802	3966	618	311	17847	RORC,LPIN2,PSRC1,NFE2,PRAMEF6,UBE2D3,HFE2,ANKRD1,COMP,NR1H2,CDC123,CSDA,DUX4,PHIP,FHL2,NIPBL,NBL1,SIRT2,NR4A1,BAG3,TRIB1,PSMC2,PRAMEF10,ZMYM6,MYOCD,TXN,MEN1,HFE,RFC4,TOP2A,BHLHB3,ZNF93,ZNF135,TGFB3,RXRA,AATF,TNNI2,IRF5,EPAS1,VEZF1,H2AFZ,RUNX2,FOS,RUNX1,SOX11,RAF1,SGK1,MAGED1,WNT7A,MIR210,CDKN2A,ZNF213,TPR,PSMA5,MYOZ1,CTDSP2,UBA52,VEGFA,UBC,TP53,ESR1,SRC,EP300,CREBBP,TRAF6,HDAC1,MYC,AR,EGFR,SMAD3,…
GO:BP	regulation of protein metabolic process	GO:0051246	1.66E-51	50.77905507	2870	618	259	17847	TMEM119,SERPINA6,PSRC1,AIMP2,PTPN6,STK38,ATP6AP2,NR1H2,CDC123,CSDA,PHIP,NIPBL,SIRT2,PRKCD,TSLP,NR4A1,TRIB1,PSMC2,PLA2G2A,MYOCD,TXN,MEN1,HFE,TGFB3,RXRA,APLNR,RPS6KA2,RAB1B,AATF,FGG,RAF1,MAGED1,WNT7A,MIR210,FBXL20,CDKN2A,TPR,MYOZ1,CTDSP2,UBA52,VEGFA,UBC,TP53,GRB2,SRC,EP300,TRAF6,HDAC1,MYC,AR,EGFR,SMAD3,JUN,BRCA1,IKBKG,CSNK2A1,YWHAG,CTNNB1,MAPK1,FYN,MDM2,ABL1,AKT1,RB1,PRKCA,ACTB,RELA,HDAC2,UBE2I,SMA…
GO:BP	regulation of cell communication	GO:0010646	1.72E-51	50.7655086	3595	618	294	17847	RNF220,JSRP1,COL2A1,HFE2,PTPN6,STK38,ANKRD1,ATP6AP2,NR1H2,CSDA,PHIP,RAB8A,FHL2,NBL1,PRKCD,TSLP,TRIB1,PSMC2,PLA2G2A,PLXNB1,GRM3,MYOCD,TXN,TUBB2B,MIR99A,MEN1,HFE,TIAM2,S100A4,RFC4,TGFB3,NEK6,APLNR,FOLR1,CHRNA4,AATF,GRIK4,FGG,SYNGR1,PIP5K1C,CYTH2,RUNX2,RUNX1,SOX11,RAF1,MAGED1,WNT7A,MIR210,FBXL20,SYNPO2L,PSMA5,MYOZ1,FGD5,UBA52,VEGFA,UBC,TP53,YWHAZ,ESR1,GRB2,SRC,EP300,CREBBP,TRAF6,HDAC1,MYC,AR,EGFR,SM…
GO:BP	RNA biosynthetic process	GO:0032774	2.16E-51	50.66651467	3707	618	299	17847	RORC,SNRPF,LPIN2,PSRC1,NFE2,PRAMEF6,UBE2D3,HFE2,ANKRD1,COMP,NR1H2,CSDA,DUX4,PHIP,FHL2,NIPBL,NBL1,SIRT2,NR4A1,BAG3,TRIB1,PSMC2,PRAMEF10,ZMYM6,MYOCD,TXN,MEN1,HFE,TOP2A,BHLHB3,ZNF93,ZNF135,TGFB3,RXRA,AATF,TNNI2,GTF2E2,IRF5,EPAS1,VEZF1,TACC1,H2AFZ,RUNX2,FOS,RUNX1,SOX11,RAF1,SGK1,MAGED1,WNT7A,CDKN2A,ZNF213,RALY,TPR,PSMA5,MYOZ1,CTDSP2,UBA52,VEGFA,UBC,TP53,ESR1,SRC,EP300,CREBBP,TRAF6,HDAC1,MYC,AR,EGFR,S…
GO:BP	regulation of nucleic acid-templated transcription	GO:1903506	2.41E-51	50.61776181	3536	618	291	17847	RORC,LPIN2,PSRC1,NFE2,PRAMEF6,UBE2D3,HFE2,ANKRD1,COMP,NR1H2,CSDA,DUX4,PHIP,FHL2,NIPBL,NBL1,SIRT2,NR4A1,BAG3,TRIB1,PSMC2,PRAMEF10,ZMYM6,MYOCD,TXN,MEN1,HFE,TOP2A,BHLHB3,ZNF93,ZNF135,TGFB3,RXRA,AATF,TNNI2,IRF5,EPAS1,VEZF1,TACC1,H2AFZ,RUNX2,FOS,RUNX1,SOX11,RAF1,SGK1,MAGED1,WNT7A,CDKN2A,ZNF213,RALY,TPR,PSMA5,MYOZ1,CTDSP2,UBA52,VEGFA,UBC,TP53,ESR1,SRC,EP300,CREBBP,TRAF6,HDAC1,MYC,AR,EGFR,SMAD3,JUN,SMAD…
GO:BP	nucleic acid-templated transcription	GO:0097659	3.47E-51	50.45918711	3693	618	298	17847	RORC,SNRPF,LPIN2,PSRC1,NFE2,PRAMEF6,UBE2D3,HFE2,ANKRD1,COMP,NR1H2,CSDA,DUX4,PHIP,FHL2,NIPBL,NBL1,SIRT2,NR4A1,BAG3,TRIB1,PSMC2,PRAMEF10,ZMYM6,MYOCD,TXN,MEN1,HFE,TOP2A,BHLHB3,ZNF93,ZNF135,TGFB3,RXRA,AATF,TNNI2,GTF2E2,IRF5,EPAS1,VEZF1,TACC1,H2AFZ,RUNX2,FOS,RUNX1,SOX11,RAF1,SGK1,MAGED1,WNT7A,CDKN2A,ZNF213,RALY,TPR,PSMA5,MYOZ1,CTDSP2,UBA52,VEGFA,UBC,TP53,ESR1,SRC,EP300,CREBBP,TRAF6,HDAC1,MYC,AR,EGFR,S…
GO:BP	regulation of transcription, DNA-templated	GO:0006355	5.60E-51	50.25165224	3464	618	287	17847	RORC,LPIN2,PSRC1,NFE2,PRAMEF6,UBE2D3,HFE2,ANKRD1,COMP,NR1H2,CSDA,DUX4,PHIP,FHL2,NIPBL,NBL1,SIRT2,NR4A1,BAG3,TRIB1,PSMC2,PRAMEF10,ZMYM6,MYOCD,TXN,MEN1,HFE,TOP2A,BHLHB3,ZNF93,ZNF135,TGFB3,RXRA,AATF,TNNI2,IRF5,EPAS1,VEZF1,H2AFZ,RUNX2,FOS,RUNX1,SOX11,RAF1,SGK1,MAGED1,WNT7A,CDKN2A,ZNF213,TPR,PSMA5,MYOZ1,CTDSP2,UBA52,VEGFA,UBC,TP53,ESR1,SRC,EP300,CREBBP,TRAF6,HDAC1,MYC,AR,EGFR,SMAD3,JUN,SMAD2,BRCA1,IKB…
GO:BP	transcription, DNA-templated	GO:0006351	1.13E-50	49.94790076	3647	618	295	17847	RORC,SNRPF,LPIN2,PSRC1,NFE2,PRAMEF6,UBE2D3,HFE2,ANKRD1,COMP,NR1H2,CSDA,DUX4,PHIP,FHL2,NIPBL,NBL1,SIRT2,NR4A1,BAG3,TRIB1,PSMC2,PRAMEF10,ZMYM6,MYOCD,TXN,MEN1,HFE,TOP2A,BHLHB3,ZNF93,ZNF135,TGFB3,RXRA,AATF,TNNI2,GTF2E2,IRF5,EPAS1,VEZF1,H2AFZ,RUNX2,FOS,RUNX1,SOX11,RAF1,SGK1,MAGED1,WNT7A,CDKN2A,ZNF213,TPR,PSMA5,MYOZ1,CTDSP2,UBA52,VEGFA,UBC,TP53,ESR1,SRC,EP300,CREBBP,TRAF6,HDAC1,MYC,AR,EGFR,SMAD3,JUN,SM…
GO:BP	cellular response to stimulus	GO:0051716	1.52E-50	49.81826099	7670	618	452	17847	RNF220,RORC,LPIN2,CMTM8,CALML6,JSRP1,GMDS,UBE2D3,COL2A1,MT1G,HFE2,PTPN6,STK38,ANKRD1,ATP6AP2,COMP,OR4F17,NR1H2,RUFY4,CSDA,NPHP1,EFNB1,ATP6V1B2,FRAT2,PHIP,RAB8A,FHL2,NIPBL,NBL1,PPFIA1,SIRT2,PRKCD,TSLP,NR4A1,BAG3,RYR1,TRIB1,BOC,IL17B,PSMC2,IL13RA1,PLA2G2A,PLXNB1,CD320,GRM3,CD8B,MYOCD,TXN,MYOM1,ADIPOR2,MIR99A,MEN1,HFE,MRPS11,TIAM2,S100A4,ACACA,RFC4,TOP2A,MT2A,TGFB3,RXRA,SAA2,NEK6,CLDN5,APLNR,FOLR1,C…
GO:BP	nucleic acid metabolic process	GO:0090304	2.23E-50	49.65195334	5145	618	359	17847	RORC,SNRPF,CLNS1A,LPIN2,PSRC1,NFE2,SEPHS1,AIMP2,PRAMEF6,UBE2D3,HFE2,ANKRD1,COMP,NR1H2,CSDA,DUX4,PHIP,FHL2,NIPBL,EXOSC1,NBL1,SIRT2,PRKCD,NR4A1,BAG3,SNRPN,TRIB1,PSMC2,PRAMEF10,ZMYM6,MYOCD,TXN,MEN1,HFE,RPUSD1,MRPS11,RFC4,TOP2A,BHLHB3,ZNF93,ZNF135,POP5,TGFB3,RXRA,CHRNA4,AATF,TNNI2,GTF2E2,IRF5,EPAS1,VEZF1,RPS26,TACC1,H2AFZ,RUNX2,FOS,MTO1,RUNX1,SOX11,RAF1,SGK1,MAGED1,WNT7A,DDX18,CDKN2A,ZNF213,RALY,TPR,…
GO:BP	regulation of gene expression	GO:0010468	1.67E-49	48.77693899	4649	618	337	17847	RORC,LPIN2,TMEM119,PSRC1,NFE2,PRAMEF6,UBE2D3,COL2A1,HFE2,ANKRD1,COMP,NR1H2,CDC123,CSDA,DUX4,PHIP,FHL2,NIPBL,EXOSC1,NBL1,SIRT2,PRKCD,NR4A1,BAG3,TRIB1,PSMC2,PRAMEF10,ZMYM6,MYOCD,TXN,MYOM1,MIR99A,MEN1,HFE,TOP2A,BHLHB3,ZNF93,ZNF135,TGFB3,RXRA,CLDN5,RPS6KA2,AATF,TNNI2,IRF5,EPAS1,VEZF1,RPS26,H2AFZ,RUNX2,FOS,RUNX1,SOX11,RAF1,SGK1,MAGED1,WNT7A,MIR210,ACTA1,CDKN2A,RAE1,ZNF213,TPR,PSMA5,MYOZ1,CTDSP2,UBA52,…
GO:BP	protein phosphorylation	GO:0006468	6.21E-49	48.20721687	2009	618	209	17847	TMEM119,PSRC1,PTPN6,STK38,ATP6AP2,PHIP,SIRT2,PRKCD,TSLP,TRIB1,PSMC2,PLA2G2A,MYOCD,TXN,MEN1,HFE,TGFB3,NEK6,APLNR,RPS6KA2,FGG,RAF1,SGK1,MAGED1,WNT7A,CDKN2A,PSMA5,CTDSP2,UBA52,VEGFA,UBC,TP53,GRB2,SRC,TRAF6,MYC,AR,EGFR,JUN,SMAD2,IKBKG,CSNK2A1,YWHAG,CTNNB1,MAPK1,IKBKE,PIK3R1,FYN,ABL1,AKT1,RB1,PRKCA,ACTB,HDAC2,SMAD4,NFKB1,STAT3,PRKACA,UBB,RARA,MAPK3,PTPN11,PRKDC,NCOR1,LCK,CBL,SHC1,YWHAB,RPS27A,HDAC3,PM…
GO:BP	response to abiotic stimulus	GO:0009628	7.44E-49	48.1283896	1243	618	162	17847	LRRC8A,ANKRD1,CSDA,CEP250,NPHP1,NIPBL,SIRT2,BAG3,RYR1,TCAP,PSMC2,MYOCD,TXN,MEN1,TGFB3,CHRNA4,ASNS,EPAS1,MB,FOS,RAF1,MIR210,ACTA1,RAE1,TPR,PSMA5,ALAS2,UBA52,VEGFA,UBC,TP53,GRB2,SRC,EP300,CREBBP,MYC,EGFR,SMAD3,JUN,BRCA1,MAPK1,PIK3R1,FYN,MDM2,AKT1,RELA,HDAC2,SMAD4,NFKB1,PRKACA,UBB,PCNA,VHL,MAPK3,PTPN11,PRKDC,CBL,RPS27A,PARP1,PML,HSPA8,YWHAE,H2AFX,NPM1,STAT1,NFKBIA,RUVBL2,GSK3B,PPARG,SUMO1,TNFRSF1A,L…
GO:BP	nucleobase-containing compound biosynthetic process	GO:0034654	4.13E-48	47.38415941	4171	618	314	17847	RORC,SNRPF,LPIN2,PSRC1,NFE2,GMDS,PRAMEF6,UBE2D3,HFE2,ANKRD1,COMP,NR1H2,CSDA,DUX4,PHIP,FHL2,NIPBL,NBL1,SIRT2,NR4A1,BAG3,TRIB1,PSMC2,PRAMEF10,ZMYM6,MYOCD,TXN,MEN1,HFE,ACACA,RFC4,TOP2A,BHLHB3,ZNF93,ZNF135,TGFB3,RXRA,SCD,AATF,TNNI2,GTF2E2,IRF5,EPAS1,VEZF1,TACC1,H2AFZ,DERA,RUNX2,FOS,RUNX1,SOX11,RAF1,SGK1,MAGED1,WNT7A,CDKN2A,ZNF213,RALY,TPR,PSMA5,AMPD1,MYOZ1,CTDSP2,UBA52,VEGFA,UBC,TP53,ESR1,SRC,EP300,C…
GO:BP	regulation of molecular function	GO:0065009	7.23E-48	47.14105634	3013	618	260	17847	SERPINA6,PSRC1,JSRP1,AIMP2,PTPN6,STK38,NR1H2,MYH6,NIPBL,SIRT2,PRKCD,NR4A1,BAG3,TRIB1,PLXNB1,GRM3,MYOCD,TXN,TNNT3,MEN1,HFE,TIAM2,COX17,RFC4,TGFB3,CLDN5,CAP1,TACC1,FOS,SOX11,ATP2A1,RAF1,SGK1,MAGED1,CLN5,SLN,MIR210,CDKN2A,MYOZ1,FGD5,UBA52,VEGFA,UBC,TP53,ESR1,SRC,EP300,TRAF6,HDAC1,MYC,AR,EGFR,SMAD3,JUN,SMAD2,IKBKG,CSNK2A1,YWHAG,CTNNB1,MAPK1,PIK3R1,FYN,MDM2,ABL1,AKT1,RB1,ACTB,RELA,HDAC2,UBE2I,SMAD4,NF…
GO:BP	heterocycle biosynthetic process	GO:0018130	1.26E-47	46.89856943	4237	618	316	17847	RORC,SNRPF,LPIN2,TMEM14C,PSRC1,NFE2,GMDS,PRAMEF6,UBE2D3,HFE2,ANKRD1,COMP,NR1H2,CSDA,DUX4,PHIP,FHL2,NIPBL,NBL1,SIRT2,NR4A1,BAG3,TRIB1,PSMC2,PRAMEF10,ZMYM6,MYOCD,TXN,MEN1,HFE,ACACA,RFC4,TOP2A,BHLHB3,ZNF93,ZNF135,TGFB3,RXRA,SCD,AATF,TNNI2,GTF2E2,IRF5,EPAS1,VEZF1,TACC1,H2AFZ,DERA,RUNX2,FOS,RUNX1,SOX11,RAF1,SGK1,MAGED1,WNT7A,CDKN2A,ZNF213,RALY,TPR,PSMA5,AMPD1,MYOZ1,ALAS2,CTDSP2,UBA52,VEGFA,UBC,TP53,ES…
GO:BP	aromatic compound biosynthetic process	GO:0019438	2.07E-47	46.68321951	4246	618	316	17847	RORC,SNRPF,LPIN2,TMEM14C,PSRC1,NFE2,GMDS,PRAMEF6,UBE2D3,HFE2,ANKRD1,COMP,NR1H2,CSDA,DUX4,PHIP,FHL2,NIPBL,NBL1,SIRT2,NR4A1,BAG3,TRIB1,PSMC2,PRAMEF10,ZMYM6,MYOCD,TXN,MEN1,HFE,ACACA,RFC4,TOP2A,BHLHB3,ZNF93,ZNF135,TGFB3,RXRA,SCD,AATF,TNNI2,GTF2E2,IRF5,EPAS1,VEZF1,TACC1,H2AFZ,DERA,RUNX2,FOS,RUNX1,SOX11,RAF1,SGK1,MAGED1,WNT7A,CDKN2A,ZNF213,RALY,TPR,PSMA5,AMPD1,MYOZ1,ALAS2,CTDSP2,UBA52,VEGFA,UBC,TP53,ES…
GO:BP	phosphorylation	GO:0016310	2.94E-47	46.53182815	2462	618	231	17847	TMEM119,PSRC1,SEPHS1,GK5,PTPN6,STK38,ATP6AP2,PFKFB4,PHIP,SIRT2,PRKCD,TSLP,TRIB1,PSMC2,PLA2G2A,MYOCD,TXN,MEN1,HFE,TGFB3,NEK6,APLNR,RPS6KA2,EFR3A,FGG,PIP5K1C,RAF1,SGK1,MAGED1,WNT7A,MIR210,CDKN2A,CKM,RAE1,CDK2AP2,TPR,PSMA5,CTDSP2,UBA52,VEGFA,UBC,TP53,YWHAZ,GRB2,SRC,TRAF6,MYC,AR,EGFR,JUN,SMAD2,IKBKG,CSNK2A1,YWHAG,CTNNB1,MAPK1,IKBKE,PIK3R1,FYN,ABL1,AKT1,RB1,PRKCA,ACTB,HDAC2,SMAD4,NFKB1,STAT3,PRKACA,UB…
GO:BP	cellular response to hormone stimulus	GO:0032870	4.70E-47	46.32745661	714	618	121	17847	RORC,LPIN2,NR1H2,ATP6V1B2,PHIP,RAB8A,FHL2,PRKCD,NR4A1,ADIPOR2,MEN1,ACACA,RXRA,CHRNA4,ASNS,H2AFZ,FOS,RUNX1,DDX18,ESR1,GRB2,SRC,EP300,HDAC1,AR,EGFR,JUN,BRCA1,YWHAG,CTNNB1,PIK3R1,FYN,MDM2,AKT1,NR3C1,RB1,RELA,SP1,NFKB1,STAT3,PRKACA,RARA,PTPN11,PRKDC,NCOR1,SHC1,PARP1,SMARCA4,NCOR2,STAT1,CRK,NCOA1,NCOA3,RUVBL2,GSK3B,PPARG,LYN,NCK1,HDAC4,JAK2,DAXX,PRKCZ,SIRT1,VDR,IRS1,HTATIP,ESR2,THRB,PAK1,APC,CREB1,CAV…
GO:BP	intracellular signal transduction	GO:0035556	4.89E-47	46.31068955	2880	618	252	17847	CALML6,JSRP1,PTPN6,STK38,ANKRD1,ATP6AP2,CSDA,RAB8A,FHL2,SIRT2,PRKCD,TRIB1,PSMC2,PLA2G2A,PLXNB1,TXN,MYOM1,MEN1,TIAM2,S100A4,RFC4,TGFB3,NEK6,APLNR,RPS6KA2,RAB1B,FGG,TNS3,PIP5K1C,CYTH2,SOX11,ATP2A1,RAF1,SGK1,MAGED1,WNT7A,CDKN2A,SYNPO2L,PSMA5,MYOZ1,DOK3,FGD5,UBA52,VEGFA,UBC,TP53,ESR1,GRB2,SRC,EP300,TRAF6,HDAC1,MYC,AR,EGFR,JUN,SMAD2,BRCA1,IKBKG,CSNK2A1,CTNNB1,MAPK1,IKBKE,PIK3R1,FYN,MDM2,ABL1,AKT1,RB1,…
GO:BP	response to hormone	GO:0009725	7.38E-47	46.13178908	1007	618	143	17847	RORC,LPIN2,NR1H2,ATP6V1B2,PHIP,RAB8A,FHL2,PRKCD,NR4A1,SNRPN,ADIPOR2,MEN1,ACACA,TGFB3,RXRA,CHRNA4,ASNS,MB,H2AFZ,FOS,RUNX1,WNT7A,ACTA1,DDX18,ESR1,GRB2,SRC,EP300,HDAC1,AR,EGFR,JUN,BRCA1,YWHAG,CTNNB1,PIK3R1,FYN,MDM2,AKT1,NR3C1,RB1,RELA,SP1,NFKB1,STAT3,PRKACA,RARA,PCNA,PTPN11,PRKDC,NCOR1,CBL,SHC1,PARP1,SMARCA4,NCOR2,STAT1,CRK,NCOA1,NCOA3,RUVBL2,GSK3B,PPARG,LYN,NCK1,HDAC4,JAK2,DAXX,CDKN1A,PRKCZ,SIRT1,N…
GO:BP	regulation of multicellular organismal process	GO:0051239	8.45E-47	46.07301973	3300	618	272	17847	TMEM119,NFE2,PTPN6,ANKRD1,ATP6AP2,COMP,NR1H2,CSDA,MYH6,PMP22,MFAP2,NIPBL,NBL1,SIRT2,PRKCD,TSLP,RYR1,TRIB1,IL17B,PSMC2,MYL2,PLXNB1,MYOCD,TUBB2B,TNNT3,ADIPOR2,MEN1,HFE,HSPB7,BHLHB3,TGFB3,RXRA,CLDN5,APLNR,SCD,C9ORF47,TNNI2,IRF5,EPAS1,MYBPH,VEZF1,FGG,PANX3,RUNX2,MYH7,FOS,RUNX1,SOX11,ATP2A1,SGK1,MAGED1,WNT7A,SLN,CACNG6,MIR210,CDKN2A,PSMA5,MYOZ1,TNNC2,VEGFA,TP53,YWHAZ,ESR1,SRC,EP300,CREBBP,TRAF6,HDAC1,…
GO:BP	negative regulation of macromolecule metabolic process	GO:0010605	8.81E-47	46.05493926	2990	618	257	17847	RORC,SERPINA6,PRAMEF6,UBE2D3,HFE2,PTPN6,STK38,ANKRD1,NR1H2,CSDA,FHL2,NIPBL,EXOSC1,SIRT2,PRKCD,NR4A1,BAG3,TRIB1,PSMC2,PRAMEF10,MYOCD,TXN,MIR99A,MEN1,HFE,BHLHB3,ZNF93,RXRA,CLDN5,AATF,RPS26,RUNX2,RUNX1,SOX11,RAF1,MAGED1,MIR210,CDKN2A,RAE1,TPR,PSMA5,MYOZ1,CTDSP2,UBA52,VEGFA,UBC,TP53,YWHAZ,ESR1,SRC,EP300,CREBBP,TRAF6,HDAC1,MYC,AR,EGFR,SMAD3,JUN,SMAD2,BRCA1,CSNK2A1,YWHAG,CTNNB1,FYN,MDM2,ABL1,AKT1,NR3C1…
GO:BP	macromolecule biosynthetic process	GO:0009059	1.27E-46	45.89743852	5092	618	350	17847	RORC,SNRPF,LPIN2,PSRC1,NFE2,AIMP2,PRAMEF6,UBE2D3,HFE2,ANKRD1,COMP,NR1H2,CDC123,CSDA,DUX4,PHIP,FHL2,NIPBL,NBL1,SIRT2,PRKCD,NR4A1,BAG3,TRIB1,MRPL14,PSMC2,PRAMEF10,ZMYM6,MYOCD,TXN,MEN1,HFE,MRPS11,RFC4,TOP2A,MRPS30,BHLHB3,ZNF93,ZNF135,TGFB3,RXRA,VCAN,AATF,TNNI2,GTF2E2,IRF5,EPAS1,VEZF1,RPS26,TACC1,H2AFZ,RUNX2,FOS,RUNX1,SOX11,MRPL53,RAF1,SGK1,MAGED1,WNT7A,MIR210,CDKN2A,ZNF213,RALY,TPR,PSMA5,MYOZ1,ALAS2…
GO:BP	positive regulation of protein metabolic process	GO:0051247	1.98E-46	45.70272259	1730	618	189	17847	TMEM119,PSRC1,AIMP2,NR1H2,CDC123,CSDA,NIPBL,SIRT2,PRKCD,TSLP,TRIB1,PSMC2,PLA2G2A,TXN,HFE,TGFB3,RXRA,APLNR,RAB1B,FGG,RAF1,MAGED1,WNT7A,CDKN2A,UBA52,VEGFA,UBC,TP53,SRC,TRAF6,MYC,AR,EGFR,SMAD3,JUN,BRCA1,IKBKG,CSNK2A1,CTNNB1,MAPK1,FYN,MDM2,ABL1,AKT1,PRKCA,RELA,HDAC2,UBE2I,SMAD4,STAT3,PRKACA,UBB,MAPK3,PTPN11,LCK,SHC1,RPS27A,HDAC3,PML,TGFBR1,PPP2CA,NPM1,NFKBIA,CRK,RUVBL2,GSK3B,PPARG,SUMO1,TNFRSF1A,LYN,…
GO:BP	gene expression	GO:0010467	4.40E-46	45.35680976	5596	618	369	17847	RORC,SNRPF,CLNS1A,LPIN2,TMEM119,PSRC1,NFE2,SEPHS1,AIMP2,PRAMEF6,UBE2D3,COL2A1,HFE2,ANKRD1,ATP6AP2,COMP,NR1H2,CDC123,CSDA,DUX4,PHIP,FHL2,NIPBL,EXOSC1,NBL1,SIRT2,PRKCD,NR4A1,BAG3,SNRPN,TRIB1,MRPL14,PSMC2,PRAMEF10,ZMYM6,MYOCD,TXN,MYOM1,MIR99A,MEN1,HFE,RPUSD1,MRPS11,TOP2A,MRPS30,BHLHB3,ZNF93,ZNF135,POP5,TGFB3,RXRA,CLDN5,RPS6KA2,AATF,TNNI2,GTF2E2,IRF5,EPAS1,VEZF1,RPS26,FGG,H2AFZ,RUNX2,FOS,MTO1,RUNX1,S…
GO:BP	cellular component organization or biogenesis	GO:0071840	4.53E-46	45.34374691	6636	618	408	17847	SNRPF,ACTR1B,PARVG,CLNS1A,ACTR6,CLTA,CIDEC,SAMM50,PSRC1,LRRC8A,NFE2,AIMP2,UBE2D3,COL2A1,PTPN6,ANKRD1,COMP,NR1H2,CDC123,RUFY4,CEP250,NPHP1,MYH6,PMP22,EFNB1,MFAP2,ATP6V1B2,FMNL3,FRAT2,PHIP,RAB8A,NIPBL,EXOSC1,NBL1,PPFIA1,SIRT2,PRKCD,FOXRED1,BAG3,RYR1,BOC,TCAP,ESPN,MRPL14,PSMC2,MYL2,PLA2G2A,PLXNB1,ZMYM6,MYOCD,MYOM1,TUBB2B,CKAP5,CENPN,TNNT3,ADIPOR2,MEN1,HFE,RPUSD1,MRPS11,COX17,PRPH,ACACA,RFC4,TOP2A,MR…
GO:BP	negative regulation of cellular metabolic process	GO:0031324	6.46E-46	45.19007536	2660	618	239	17847	RORC,SERPINA6,PRAMEF6,UBE2D3,HFE2,PTPN6,STK38,ANKRD1,NR1H2,CSDA,FHL2,NIPBL,SIRT2,PRKCD,NR4A1,BAG3,TRIB1,PRAMEF10,MYOCD,TXN,MEN1,HFE,BHLHB3,ZNF93,RXRA,AATF,RPS26,RUNX2,RUNX1,SOX11,RAF1,MAGED1,MIR210,CDKN2A,TPR,MYOZ1,CTDSP2,UBA52,VEGFA,UBC,TP53,ESR1,SRC,EP300,CREBBP,TRAF6,HDAC1,MYC,AR,SMAD3,JUN,SMAD2,BRCA1,CSNK2A1,YWHAG,CTNNB1,FYN,MDM2,ABL1,AKT1,NR3C1,RB1,RELA,HDAC2,UBE2I,SMAD4,NFKB1,STAT3,UBB,RARA…
GO:BP	cellular component organization	GO:0016043	7.22E-46	45.14158069	6454	618	401	17847	SNRPF,ACTR1B,PARVG,CLNS1A,ACTR6,CLTA,CIDEC,SAMM50,PSRC1,LRRC8A,NFE2,AIMP2,UBE2D3,COL2A1,PTPN6,ANKRD1,COMP,NR1H2,CDC123,RUFY4,CEP250,NPHP1,MYH6,PMP22,EFNB1,MFAP2,ATP6V1B2,FMNL3,FRAT2,PHIP,RAB8A,NIPBL,NBL1,PPFIA1,SIRT2,PRKCD,FOXRED1,BAG3,RYR1,BOC,TCAP,ESPN,MRPL14,PSMC2,MYL2,PLA2G2A,PLXNB1,ZMYM6,MYOCD,MYOM1,TUBB2B,CKAP5,CENPN,TNNT3,ADIPOR2,MEN1,HFE,MRPS11,COX17,PRPH,ACACA,RFC4,TOP2A,MRPS30,ZNF135,TG…
GO:BP	regulation of cellular component organization	GO:0051128	7.69E-46	45.11426663	2488	618	230	17847	PSRC1,UBE2D3,ANKRD1,NR1H2,CEP250,NPHP1,PMP22,FMNL3,PHIP,NIPBL,PPFIA1,SIRT2,PRKCD,BAG3,ESPN,PSMC2,MYL2,PLXNB1,ZMYM6,MYOCD,TUBB2B,ADIPOR2,HFE,TOP2A,ZNF135,TGFB3,INF2,NEK6,CLDN5,RPS6KA2,RAB1B,FGG,RUNX1,RAF1,SGK1,WNT7A,SLN,MIR210,CDKN2A,RAE1,SYNPO2L,CDK2AP2,TPR,FGD5,NSMCE2,VEGFA,TP53,YWHAZ,ESR1,GRB2,SRC,EP300,MYC,AR,EGFR,SMAD3,BRCA1,CSNK2A1,YWHAG,CTNNB1,MAPK1,PIK3R1,FYN,MDM2,ABL1,AKT1,RB1,HDAC2,SMAD4…
GO:BP	negative regulation of metabolic process	GO:0009892	7.91E-46	45.10157066	3231	618	267	17847	RORC,SERPINA6,PRAMEF6,UBE2D3,HFE2,PTPN6,STK38,ANKRD1,NR1H2,CSDA,FHL2,NIPBL,EXOSC1,SIRT2,PRKCD,NR4A1,BAG3,TRIB1,PSMC2,PRAMEF10,MYOCD,TXN,MIR99A,MEN1,HFE,BHLHB3,ZNF93,RXRA,CLDN5,AATF,RPS26,RUNX2,RUNX1,SOX11,RAF1,MAGED1,MIR210,CDKN2A,RAE1,TPR,PSMA5,MYOZ1,CTDSP2,UBA52,VEGFA,UBC,TP53,YWHAZ,ESR1,SRC,EP300,CREBBP,TRAF6,HDAC1,MYC,AR,EGFR,SMAD3,JUN,SMAD2,BRCA1,CSNK2A1,YWHAG,CTNNB1,FYN,MDM2,ABL1,AKT1,NR3C1…
GO:BP	signal transduction	GO:0007165	2.41E-45	44.61766695	6210	618	391	17847	RNF220,RORC,CMTM8,CALML6,JSRP1,GMDS,UBE2D3,COL2A1,HFE2,PTPN6,STK38,ANKRD1,ATP6AP2,COMP,OR4F17,NR1H2,CSDA,NPHP1,EFNB1,ATP6V1B2,FRAT2,PHIP,RAB8A,FHL2,NBL1,PPFIA1,SIRT2,PRKCD,TSLP,NR4A1,BAG3,TRIB1,BOC,IL17B,PSMC2,IL13RA1,PLA2G2A,PLXNB1,CD320,GRM3,CD8B,MYOCD,TXN,MYOM1,ADIPOR2,MIR99A,MEN1,HFE,TIAM2,S100A4,RFC4,MT2A,TGFB3,RXRA,NEK6,CLDN5,APLNR,FOLR1,CHRNA4,C9ORF47,RPS6KA2,RAB1B,AATF,FLNB,ASNS,IRF5,EPAS…
GO:BP	cell surface receptor signaling pathway	GO:0007166	3.14E-45	44.50303229	3128	618	261	17847	RNF220,RORC,GMDS,UBE2D3,COL2A1,HFE2,PTPN6,ATP6AP2,COMP,NR1H2,EFNB1,ATP6V1B2,FRAT2,PHIP,NBL1,SIRT2,PRKCD,TSLP,BAG3,TRIB1,BOC,PSMC2,IL13RA1,PLXNB1,GRM3,CD8B,MYOCD,ADIPOR2,MIR99A,MEN1,HFE,MT2A,TGFB3,CLDN5,FOLR1,CHRNA4,C9ORF47,IRF5,GRIK4,FGG,RUNX2,FOS,RUNX1,SOX11,RAF1,WNT7A,PSMA5,UBA52,VEGFA,UBC,TP53,YWHAZ,ESR1,GRB2,SRC,EP300,CREBBP,TRAF6,HDAC1,MYC,AR,EGFR,SMAD3,JUN,SMAD2,BRCA1,IKBKG,CSNK2A1,CTNNB1,M…
GO:BP	positive regulation of transcription by RNA polymerase II	GO:0045944	3.26E-45	44.48652852	1199	618	154	17847	LPIN2,HFE2,NR1H2,DUX4,PHIP,NIPBL,SIRT2,NR4A1,PSMC2,MYOCD,MEN1,TOP2A,TGFB3,RXRA,AATF,IRF5,EPAS1,VEZF1,H2AFZ,RUNX2,FOS,RUNX1,SOX11,RAF1,WNT7A,CDKN2A,UBA52,VEGFA,UBC,TP53,ESR1,EP300,CREBBP,TRAF6,HDAC1,MYC,AR,EGFR,SMAD3,JUN,SMAD2,BRCA1,IKBKG,CTNNB1,PIK3R1,ABL1,AKT1,NR3C1,RB1,RELA,SP1,HDAC2,SMAD4,NFKB1,STAT3,UBB,RARA,MAPK3,PRKDC,SIN3A,RPS27A,HDAC3,PARP1,SMARCA4,NPM1,STAT1,NFKBIA,NCOA1,NCOA3,RUVBL2,PPA…
GO:BP	cellular macromolecule biosynthetic process	GO:0034645	3.46E-45	44.46089847	4937	618	341	17847	RORC,SNRPF,LPIN2,PSRC1,NFE2,AIMP2,PRAMEF6,UBE2D3,HFE2,ANKRD1,COMP,NR1H2,CDC123,CSDA,DUX4,PHIP,FHL2,NIPBL,NBL1,SIRT2,NR4A1,BAG3,TRIB1,MRPL14,PSMC2,PRAMEF10,ZMYM6,MYOCD,TXN,MEN1,HFE,MRPS11,RFC4,TOP2A,MRPS30,BHLHB3,ZNF93,ZNF135,TGFB3,RXRA,VCAN,AATF,TNNI2,GTF2E2,IRF5,EPAS1,VEZF1,RPS26,H2AFZ,RUNX2,FOS,RUNX1,SOX11,MRPL53,RAF1,SGK1,MAGED1,WNT7A,MIR210,CDKN2A,ZNF213,TPR,PSMA5,MYOZ1,ALAS2,DAD1,CTDSP2,UBA5…
GO:BP	RNA metabolic process	GO:0016070	4.67E-45	44.33113006	4653	618	329	17847	RORC,SNRPF,CLNS1A,LPIN2,PSRC1,NFE2,SEPHS1,AIMP2,PRAMEF6,UBE2D3,HFE2,ANKRD1,COMP,NR1H2,CSDA,DUX4,PHIP,FHL2,NIPBL,EXOSC1,NBL1,SIRT2,PRKCD,NR4A1,BAG3,SNRPN,TRIB1,PSMC2,PRAMEF10,ZMYM6,MYOCD,TXN,MEN1,HFE,RPUSD1,MRPS11,TOP2A,BHLHB3,ZNF93,ZNF135,POP5,TGFB3,RXRA,AATF,TNNI2,GTF2E2,IRF5,EPAS1,VEZF1,RPS26,TACC1,H2AFZ,RUNX2,FOS,MTO1,RUNX1,SOX11,RAF1,SGK1,MAGED1,WNT7A,DDX18,CDKN2A,ZNF213,RALY,TPR,PSMA5,MYOZ1,…
GO:BP	positive regulation of signal transduction	GO:0009967	4.70E-45	44.3276658	1715	618	186	17847	RNF220,PTPN6,ANKRD1,ATP6AP2,PHIP,PRKCD,TSLP,PSMC2,PLA2G2A,PLXNB1,MYOCD,TXN,MEN1,HFE,S100A4,TGFB3,NEK6,FGG,SOX11,RAF1,MAGED1,WNT7A,MIR210,SYNPO2L,PSMA5,UBA52,VEGFA,UBC,TP53,YWHAZ,ESR1,GRB2,SRC,EP300,CREBBP,TRAF6,AR,EGFR,SMAD3,JUN,SMAD2,IKBKG,CSNK2A1,YWHAG,CTNNB1,MAPK1,IKBKE,PIK3R1,FYN,ABL1,AKT1,PRKCA,RELA,HDAC2,UBE2I,SMAD4,NFKB1,STAT3,UBB,MAPK3,PTPN11,LCK,CBL,SHC1,YWHAQ,YWHAB,RPS27A,HDAC3,PARP1,PM…
GO:BP	negative regulation of nitrogen compound metabolic process	GO:0051172	1.04E-44	43.98415057	2467	618	227	17847	RORC,SERPINA6,PRAMEF6,UBE2D3,HFE2,PTPN6,STK38,ANKRD1,NR1H2,CSDA,FHL2,NIPBL,SIRT2,PRKCD,NR4A1,BAG3,TRIB1,PRAMEF10,MYOCD,TXN,MEN1,HFE,BHLHB3,ZNF93,RXRA,AATF,RPS26,RUNX2,RUNX1,SOX11,RAF1,MAGED1,MIR210,CDKN2A,TPR,MYOZ1,CTDSP2,UBA52,VEGFA,UBC,TP53,ESR1,SRC,EP300,CREBBP,TRAF6,HDAC1,MYC,AR,EGFR,SMAD3,JUN,SMAD2,BRCA1,CSNK2A1,YWHAG,CTNNB1,FYN,MDM2,ABL1,AKT1,NR3C1,RB1,RELA,HDAC2,UBE2I,SMAD4,NFKB1,STAT3,UBB…
GO:BP	regulation of developmental process	GO:0050793	1.84E-44	43.73612225	2729	618	240	17847	RORC,TMEM119,NFE2,PRAMEF6,PTPN6,ANKRD1,COMP,NR1H2,CSDA,MYH6,PMP22,FMNL3,PHIP,NIPBL,NBL1,SIRT2,TRIB1,BOC,PSMC2,PLA2G2A,PRAMEF10,PLXNB1,ZMYM6,MYOCD,TUBB2B,MEN1,BHLHB3,ZNF135,TGFB3,RXRA,INF2,NEK6,CLDN5,APLNR,C9ORF47,VEZF1,FGG,RUNX2,FOS,RUNX1,SOX11,RAF1,MAGED1,WNT7A,MIR210,CDKN2A,PSMA5,MYOZ1,FGD5,VEGFA,TP53,YWHAZ,ESR1,SRC,EP300,CREBBP,TRAF6,HDAC1,MYC,AR,EGFR,SMAD3,JUN,SMAD2,BRCA1,YWHAG,CTNNB1,MAPK1,P…
GO:BP	positive regulation of response to stimulus	GO:0048584	1.89E-44	43.72388272	2514	618	229	17847	RNF220,UBE2D3,PTPN6,ANKRD1,ATP6AP2,PHIP,PRKCD,TSLP,IL17B,PSMC2,PLA2G2A,PLXNB1,MYOCD,TXN,TUBB2B,MEN1,HFE,S100A4,TGFB3,NEK6,FGG,RUNX1,SOX11,RAF1,MAGED1,WNT7A,MIR210,CDKN2A,SYNPO2L,PSMA5,UBA52,VEGFA,UBC,TP53,YWHAZ,ESR1,GRB2,SRC,EP300,CREBBP,TRAF6,MYC,AR,EGFR,SMAD3,JUN,SMAD2,BRCA1,IKBKG,CSNK2A1,YWHAG,CTNNB1,MAPK1,IKBKE,PIK3R1,FYN,ABL1,AKT1,UBE2D2,PRKCA,ACTB,RELA,HDAC2,UBE2I,SMAD4,NFKB1,STAT3,PRKACA,U…
GO:BP	regulation of cellular protein metabolic process	GO:0032268	3.27E-44	43.48484389	2698	618	238	17847	TMEM119,SERPINA6,PSRC1,AIMP2,PTPN6,STK38,ATP6AP2,NR1H2,CDC123,CSDA,PHIP,NIPBL,SIRT2,PRKCD,TSLP,NR4A1,TRIB1,PSMC2,PLA2G2A,MYOCD,TXN,MEN1,HFE,TGFB3,RXRA,APLNR,FGG,RAF1,MAGED1,WNT7A,MIR210,CDKN2A,TPR,MYOZ1,CTDSP2,UBA52,VEGFA,UBC,TP53,GRB2,SRC,EP300,TRAF6,MYC,AR,EGFR,SMAD3,JUN,BRCA1,IKBKG,CSNK2A1,YWHAG,CTNNB1,MAPK1,FYN,MDM2,ABL1,AKT1,RB1,PRKCA,ACTB,RELA,HDAC2,UBE2I,SMAD4,NFKB1,STAT3,PRKACA,UBB,RARA,M…
GO:BP	organic cyclic compound biosynthetic process	GO:1901362	6.67E-44	43.17584215	4397	618	316	17847	RORC,SNRPF,LPIN2,TMEM14C,PSRC1,NFE2,GMDS,PRAMEF6,UBE2D3,HFE2,ANKRD1,COMP,NR1H2,CSDA,DUX4,PHIP,FHL2,NIPBL,NBL1,SIRT2,NR4A1,BAG3,TRIB1,PSMC2,PRAMEF10,ZMYM6,MYOCD,TXN,MEN1,HFE,ACACA,RFC4,TOP2A,BHLHB3,ZNF93,ZNF135,TGFB3,RXRA,SCD,AATF,TNNI2,GTF2E2,IRF5,EPAS1,VEZF1,TACC1,H2AFZ,DERA,RUNX2,FOS,RUNX1,SOX11,RAF1,SGK1,MAGED1,WNT7A,CDKN2A,ZNF213,RALY,TPR,PSMA5,AMPD1,MYOZ1,ALAS2,CTDSP2,UBA52,VEGFA,UBC,TP53,ES…
GO:BP	animal organ development	GO:0048513	1.07E-43	42.97180741	3635	618	282	17847	RORC,TMEM119,TMEM14C,CRELD1,LRRC8A,NFE2,AIMP2,COL2A1,MT1G,PTPN6,ANKRD1,COMP,CSDA,NPHP1,MYH6,EFNB1,MEPE,MFAP2,FHL2,NIPBL,SIRT2,NR4A1,BAG3,WDR72,RYR1,TRIB1,TCAP,PSMC2,MYL2,SLC38A10,PLXNB1,MYOCD,MYOM1,TUBB2B,ADIPOR2,MEN1,HFE,COX17,S100A4,HSPB7,TOP2A,BHLHB3,UNC45A,TGFB3,RXRA,CSN3,KLK4,MYH11,CLDN5,APLNR,FOLR1,RPS6KA2,FLNB,ASNS,EPAS1,XIRP2,MB,TACC1,TNS3,RUNX2,MYH7,FOS,RUNX1,SOX11,RAF1,MAGED1,CLN5,WNT7A…
GO:BP	cellular nitrogen compound biosynthetic process	GO:0044271	1.31E-43	42.88282383	4937	618	338	17847	RORC,SNRPF,LPIN2,TMEM14C,PSRC1,NFE2,GMDS,AIMP2,PRAMEF6,UBE2D3,HFE2,ANKRD1,COMP,NR1H2,CDC123,CSDA,DUX4,PHIP,FHL2,NIPBL,NBL1,SIRT2,PRKCD,NR4A1,BAG3,TRIB1,MRPL14,PSMC2,PRAMEF10,ZMYM6,MYOCD,TXN,MEN1,HFE,MRPS11,ACACA,RFC4,TOP2A,MRPS30,BHLHB3,ZNF93,ZNF135,TGFB3,RXRA,SCD,AATF,TNNI2,GTF2E2,ASNS,IRF5,EPAS1,VEZF1,RPS26,TACC1,H2AFZ,DERA,RUNX2,FOS,RUNX1,SOX11,MRPL53,RAF1,SGK1,MAGED1,WNT7A,MIR210,CDKN2A,ZNF21…
GO:BP	positive regulation of cellular protein metabolic process	GO:0032270	2.49E-43	42.60377162	1625	618	178	17847	TMEM119,PSRC1,AIMP2,NR1H2,CDC123,CSDA,NIPBL,SIRT2,PRKCD,TSLP,TRIB1,PSMC2,PLA2G2A,TXN,HFE,TGFB3,RXRA,APLNR,FGG,RAF1,MAGED1,WNT7A,CDKN2A,UBA52,VEGFA,UBC,TP53,SRC,TRAF6,MYC,AR,EGFR,SMAD3,JUN,BRCA1,IKBKG,CTNNB1,MAPK1,FYN,MDM2,ABL1,AKT1,PRKCA,HDAC2,UBE2I,SMAD4,STAT3,PRKACA,UBB,MAPK3,PTPN11,LCK,SHC1,RPS27A,HDAC3,PML,TGFBR1,PPP2CA,NPM1,NFKBIA,CRK,RUVBL2,GSK3B,PPARG,SUMO1,TNFRSF1A,LYN,VIM,SUMO2,NCK1,HDAC…
GO:BP	nucleobase-containing compound metabolic process	GO:0006139	7.25E-43	42.139921	5677	618	366	17847	RORC,SNRPF,CLNS1A,LPIN2,PSRC1,NFE2,GMDS,SEPHS1,AIMP2,PRAMEF6,UBE2D3,HFE2,ANKRD1,COMP,NR1H2,CSDA,PFKFB4,DUX4,PHIP,FHL2,NIPBL,EXOSC1,NBL1,SIRT2,PRKCD,NR4A1,BAG3,SNRPN,TRIB1,PSMC2,PRAMEF10,ZMYM6,MYOCD,TXN,MEN1,HFE,RPUSD1,MRPS11,ACACA,RFC4,TOP2A,BHLHB3,ZNF93,ZNF135,POP5,TGFB3,RXRA,SCD,CHRNA4,AATF,TNNI2,GTF2E2,IRF5,EPAS1,VEZF1,RPS26,TACC1,H2AFZ,DERA,RUNX2,FOS,MTO1,RUNX1,SOX11,RAF1,SGK1,MAGED1,WNT7A,DD…
GO:BP	regulation of response to stress	GO:0080134	7.54E-43	42.12284189	1554	618	173	17847	UBE2D3,PTPN6,ANKRD1,NR1H2,CSDA,SIGLEC10,SIRT2,PRKCD,TSLP,BAG3,IL17B,PSMC2,PLA2G2A,TXN,MEN1,NEK6,FGG,RAF1,WNT7A,MIR210,CDKN2A,RAE1,TPR,PSMA5,MYOZ1,UBA52,VEGFA,UBC,TP53,ESR1,SRC,EP300,CREBBP,TRAF6,MYC,EGFR,SMAD3,BRCA1,IKBKG,CTNNB1,MAPK1,IKBKE,PIK3R1,FYN,MDM2,ABL1,AKT1,UBE2D2,RB1,PRKCA,RELA,NFKB1,PRKACA,UBB,PCNA,MAPK3,PTPN11,PRKDC,NCOR1,SIN3A,RPS27A,HDAC3,PARP1,PML,HSPA8,YWHAE,H2AFX,NPM1,STAT1,NFKBI…
GO:BP	positive regulation of signaling	GO:0023056	9.55E-43	42.01978698	1882	618	192	17847	RNF220,PTPN6,ANKRD1,ATP6AP2,PHIP,PRKCD,TSLP,PSMC2,PLA2G2A,PLXNB1,MYOCD,TXN,MEN1,HFE,S100A4,TGFB3,NEK6,FGG,SOX11,RAF1,MAGED1,WNT7A,MIR210,SYNPO2L,PSMA5,UBA52,VEGFA,UBC,TP53,YWHAZ,ESR1,GRB2,SRC,EP300,CREBBP,TRAF6,AR,EGFR,SMAD3,JUN,SMAD2,IKBKG,CSNK2A1,YWHAG,CTNNB1,MAPK1,IKBKE,PIK3R1,FYN,ABL1,AKT1,PRKCA,RELA,HDAC2,UBE2I,SMAD4,NFKB1,STAT3,UBB,MAPK3,PTPN11,LCK,CBL,SHC1,YWHAQ,YWHAB,RPS27A,HDAC3,PARP1,PM…
GO:BP	positive regulation of cell communication	GO:0010647	2.26E-42	41.64662895	1875	618	191	17847	RNF220,PTPN6,ANKRD1,ATP6AP2,PHIP,PRKCD,TSLP,PSMC2,PLA2G2A,PLXNB1,MYOCD,TXN,MEN1,HFE,S100A4,TGFB3,NEK6,FGG,SOX11,RAF1,MAGED1,WNT7A,MIR210,SYNPO2L,PSMA5,UBA52,VEGFA,UBC,TP53,YWHAZ,ESR1,GRB2,SRC,EP300,CREBBP,TRAF6,AR,EGFR,SMAD3,JUN,SMAD2,IKBKG,CSNK2A1,YWHAG,CTNNB1,MAPK1,IKBKE,PIK3R1,FYN,ABL1,AKT1,PRKCA,RELA,HDAC2,UBE2I,SMAD4,NFKB1,STAT3,UBB,MAPK3,PTPN11,LCK,CBL,SHC1,YWHAQ,YWHAB,RPS27A,HDAC3,PARP1,PM…
GO:BP	response to oxygen-containing compound	GO:1901700	2.39E-42	41.62102688	1719	618	182	17847	RORC,LPIN2,ANKRD1,NR1H2,ATP6V1B2,PHIP,RAB8A,SIRT2,PRKCD,NR4A1,TRIB1,TXN,MEN1,ACACA,TGFB3,RXRA,CLDN5,SCD,FOLR1,CHRNA4,RPS6KA2,ASNS,IRF5,MB,H2AFZ,FOS,RAF1,WNT7A,DDX18,TP53,ESR1,GRB2,SRC,TRAF6,AR,EGFR,JUN,SMAD2,BRCA1,YWHAG,CTNNB1,MAPK1,PIK3R1,FYN,MDM2,ABL1,AKT1,NR3C1,PRKCA,ACTB,RELA,SP1,HDAC2,NFKB1,STAT3,PRKACA,RARA,PCNA,MAPK3,PTPN11,PRKDC,CBL,SHC1,SIN3A,PARP1,SMARCA4,TGFBR1,NCOR2,STAT1,NFKBIA,CRK,N…
GO:BP	response to cytokine	GO:0034097	2.86E-42	41.54438733	1217	618	151	17847	RORC,PTPN6,ANKRD1,NR1H2,RUFY4,CSDA,PRKCD,TSLP,PSMC2,IL13RA1,ADIPOR2,MIR99A,MT2A,FLNB,IRF5,FGG,SYNGR1,FOS,RUNX1,TPR,PSMA5,UBA52,VEGFA,UBC,TP53,YWHAZ,GRB2,SRC,TRAF6,MYC,SMAD3,JUN,BRCA1,IKBKG,MAPK1,IKBKE,PIK3R1,FYN,AKT1,PRKCA,RELA,SMAD4,NFKB1,STAT3,PRKACA,UBB,RARA,MAPK3,PTPN11,CBL,SHC1,RPS27A,PML,SMARCA4,HSPA8,STAT1,NFKBIA,CRK,GSK3B,PPARG,CEBPB,SUMO1,TNFRSF1A,IKBKB,VIM,HDAC4,MAPK14,JAK2,SYK,CDKN1A,H…
GO:BP	regulation of catabolic process	GO:0009894	4.03E-42	41.39450797	998	618	136	17847	TPCN1,RUFY4,CSDA,PFKFB4,ATP6V1B2,RAB8A,EXOSC1,SIRT2,PRKCD,BAG3,TRIB1,PSMC2,HFE,RAB1B,MIR210,FBXL20,CDKN2A,RAE1,TPR,PSMA5,UBA52,UBC,TP53,YWHAZ,EP300,EGFR,SMAD3,IKBKG,CSNK2A1,FYN,MDM2,ABL1,AKT1,PRKCA,RELA,STAT3,PRKACA,UBB,MAPK3,NCOR1,YWHAB,RPS27A,PML,HSPA8,NPM1,GSK3B,EEF1A1,SUMO1,VIM,SUMO2,HDAC4,MAPK14,FLNA,PIN1,HIF1A,PLK1,SIRT1,PRKAB1,CSNK2A2,APP,IRS1,DHX9,STUB1,HTATIP,SMURF1,ATM,MAPK8,APC,HGS,SMU…
GO:BP	negative regulation of gene expression	GO:0010629	5.11E-42	41.29176309	2120	618	204	17847	RORC,PRAMEF6,UBE2D3,HFE2,ANKRD1,NR1H2,CSDA,FHL2,NIPBL,EXOSC1,SIRT2,PRKCD,BAG3,PSMC2,PRAMEF10,MYOCD,TXN,MIR99A,MEN1,BHLHB3,ZNF93,RXRA,CLDN5,RPS26,RUNX2,RUNX1,SOX11,MAGED1,MIR210,CDKN2A,RAE1,TPR,PSMA5,MYOZ1,UBA52,VEGFA,UBC,TP53,YWHAZ,ESR1,SRC,EP300,CREBBP,TRAF6,HDAC1,MYC,AR,EGFR,SMAD3,JUN,SMAD2,BRCA1,CTNNB1,FYN,MDM2,AKT1,NR3C1,RB1,PRKCA,RELA,HDAC2,UBE2I,SMAD4,NFKB1,STAT3,UBB,RARA,PCNA,VHL,NCOR1,SHC…
GO:BP	regulation of phosphorylation	GO:0042325	5.24E-42	41.28073606	1626	618	176	17847	TMEM119,PSRC1,PTPN6,STK38,ATP6AP2,PFKFB4,PHIP,SIRT2,PRKCD,TSLP,TRIB1,PLA2G2A,MYOCD,TXN,MEN1,HFE,TGFB3,APLNR,FGG,RAF1,MAGED1,WNT7A,MIR210,CDKN2A,RAE1,TPR,CTDSP2,UBA52,VEGFA,UBC,TP53,GRB2,SRC,TRAF6,MYC,AR,EGFR,JUN,IKBKG,YWHAG,CTNNB1,MAPK1,PIK3R1,FYN,ABL1,AKT1,RB1,PRKCA,ACTB,HDAC2,SMAD4,STAT3,PRKACA,UBB,MAPK3,PTPN11,PRKDC,NCOR1,CBL,SHC1,RPS27A,HDAC3,PML,TGFBR1,PPP2CA,NPM1,CRK,PPP2R1A,MCM7,EEF1A1,TNF…
GO:BP	multi-organism process	GO:0051704	5.75E-42	41.24050711	3042	618	251	17847	TRAM1,TMEM119,UBE2D3,PTPN6,ANKRD1,NR1H2,CSDA,ODF4,NPHP1,SIGLEC10,SIRT2,PRKCD,TRIB1,PSMC2,PLA2G2A,CD8B,ADIPOR2,MEN1,HFE,IFI44L,TOP2A,MT2A,TGFB3,RXRA,RPS6KA2,RAB1B,FLNB,IRF5,RPS26,FGG,FOS,RAF1,PRSS21,RAE1,TSPY2,TPR,PSMA5,UBA52,UBC,TP53,ESR1,GRB2,SRC,EP300,CREBBP,TRAF6,HDAC1,AR,EGFR,SMAD3,JUN,IKBKG,CTNNB1,MAPK1,IKBKE,PIK3R1,FYN,MDM2,ABL1,AKT1,UBE2D2,RB1,PRKCA,RELA,SP1,HDAC2,UBE2I,SMAD4,NFKB1,STAT3,P…
GO:BP	negative regulation of cell death	GO:0060548	7.38E-42	41.13169898	1032	618	138	17847	PRAMEF6,COL2A1,COMP,CSDA,PHIP,FHL2,PRKCD,TSLP,NR4A1,BAG3,PRAMEF10,MYOCD,TXN,TGFB3,AATF,ASNS,FGG,SOX11,RAF1,WNT7A,MIR210,DAD1,UBA52,VEGFA,UBC,TP53,YWHAZ,SRC,TRAF6,HDAC1,MYC,AR,EGFR,SMAD3,JUN,BRCA1,IKBKG,CSNK2A1,CTNNB1,PIK3R1,FYN,MDM2,ABL1,AKT1,RB1,PRKCA,RELA,HDAC2,SMAD4,NFKB1,STAT3,UBB,RARA,VHL,PRKDC,CBL,SHC1,SIN3A,RPS27A,HDAC3,TGFBR1,YWHAE,NPM1,NFKBIA,GSK3B,CEBPB,IKBKB,NCK1,JAK2,FLNA,CDK1,PIN1,CD…
GO:BP	developmental process	GO:0032502	8.60E-42	41.06547347	6449	618	393	17847	RORC,PARVG,TMEM119,CMTM8,TMEM14C,CRELD1,LRRC8A,NFE2,AIMP2,PRAMEF6,COL2A1,MT1G,PTPN6,ANKRD1,ATP6AP2,COMP,NR1H2,CSDA,ODF4,NPHP1,MYH6,PMP22,EFNB1,DUX4,MEPE,MFAP2,FMNL3,FRAT2,PHIP,RAB8A,FHL2,NIPBL,NBL1,SIRT2,PRKCD,NR4A1,BAG3,WDR72,RYR1,TRIB1,BOC,TCAP,PSMC2,MYL2,PLA2G2A,SLC38A10,PRAMEF10,PLXNB1,ZMYM6,MYOCD,MYOM1,TUBB2B,PPDPF,TNNT3,ADIPOR2,MEN1,DCAF7,HFE,COX17,S100A4,HSPB7,TOP2A,SCRG1,BHLHB3,ZNF135,UNC…
GO:BP	cellular aromatic compound metabolic process	GO:0006725	1.18E-41	40.92738502	5895	618	372	17847	RORC,SNRPF,CLNS1A,HPDL,LPIN2,TMEM14C,PSRC1,NFE2,GMDS,SEPHS1,AIMP2,PRAMEF6,UBE2D3,HFE2,ANKRD1,COMP,NR1H2,CSDA,PFKFB4,DUX4,PHIP,FHL2,NIPBL,EXOSC1,NBL1,SIRT2,PRKCD,NR4A1,BAG3,SNRPN,TRIB1,PSMC2,PRAMEF10,CD320,ZMYM6,MYOCD,TXN,MEN1,HFE,RPUSD1,MRPS11,ACACA,RFC4,TOP2A,BHLHB3,ZNF93,ZNF135,POP5,TGFB3,RXRA,SCD,FOLR1,CHRNA4,AATF,TNNI2,GTF2E2,IRF5,EPAS1,VEZF1,RPS26,TACC1,H2AFZ,DERA,RUNX2,FOS,MTO1,RUNX1,SOX11,…
GO:BP	negative regulation of nucleobase-containing compound metabolic process	GO:0045934	1.19E-41	40.92584443	1469	618	166	17847	RORC,PRAMEF6,UBE2D3,HFE2,ANKRD1,NR1H2,CSDA,FHL2,NIPBL,SIRT2,BAG3,PRAMEF10,MYOCD,TXN,MEN1,BHLHB3,ZNF93,RXRA,RPS26,RUNX2,RUNX1,SOX11,MAGED1,CDKN2A,TPR,MYOZ1,UBA52,VEGFA,UBC,TP53,ESR1,SRC,EP300,CREBBP,TRAF6,HDAC1,MYC,AR,SMAD3,JUN,SMAD2,BRCA1,CTNNB1,MDM2,NR3C1,RB1,RELA,HDAC2,UBE2I,SMAD4,NFKB1,STAT3,UBB,RARA,PCNA,VHL,NCOR1,SHC1,YWHAQ,YWHAB,SIN3A,RPS27A,HDAC3,PARP1,PML,SMARCA4,HSPA8,NCOR2,STAT1,RUVBL2,…
GO:BP	cell communication	GO:0007154	1.31E-41	40.88416704	6706	618	402	17847	RNF220,RORC,CMTM8,CALML6,JSRP1,GMDS,UBE2D3,COL2A1,HFE2,PTPN6,STK38,ANKRD1,ATP6AP2,COMP,OR4F17,NR1H2,CSDA,NPHP1,PMP22,EFNB1,ATP6V1B2,FRAT2,PHIP,RAB8A,FHL2,NBL1,PPFIA1,SIRT2,PRKCD,TSLP,NR4A1,BAG3,TRIB1,BOC,IL17B,PSMC2,IL13RA1,PLA2G2A,PLXNB1,CD320,GRM3,CD8B,MYOCD,TXN,MYOM1,TUBB2B,ADIPOR2,MIR99A,MEN1,HFE,TIAM2,S100A4,RFC4,MT2A,TGFB3,RXRA,NEK6,CLDN5,APLNR,FOLR1,CHRNA4,C9ORF47,RPS6KA2,RAB1B,AATF,FLNB,A…
GO:BP	signaling	GO:0023052	1.46E-41	40.83484149	6681	618	401	17847	RNF220,RORC,CMTM8,CALML6,JSRP1,GMDS,UBE2D3,COL2A1,HFE2,PTPN6,STK38,ANKRD1,ATP6AP2,COMP,OR4F17,NR1H2,CSDA,NPHP1,PMP22,EFNB1,ATP6V1B2,FRAT2,PHIP,RAB8A,FHL2,NBL1,PPFIA1,SIRT2,PRKCD,TSLP,NR4A1,BAG3,RYR1,TRIB1,BOC,IL17B,PSMC2,IL13RA1,PLA2G2A,PLXNB1,CD320,GRM3,CD8B,MYOCD,TXN,MYOM1,TUBB2B,ADIPOR2,MIR99A,MEN1,HFE,TIAM2,S100A4,RFC4,MT2A,TGFB3,RXRA,NEK6,CLDN5,APLNR,FOLR1,CHRNA4,C9ORF47,RPS6KA2,RAB1B,AATF,F…
GO:BP	regulation of intracellular signal transduction	GO:1902531	1.50E-41	40.82330061	1881	618	190	17847	JSRP1,PTPN6,STK38,ANKRD1,ATP6AP2,CSDA,FHL2,PRKCD,TRIB1,PLA2G2A,PLXNB1,TXN,MEN1,TIAM2,S100A4,RFC4,TGFB3,NEK6,APLNR,FGG,PIP5K1C,CYTH2,SOX11,RAF1,MAGED1,WNT7A,SYNPO2L,MYOZ1,FGD5,UBA52,VEGFA,UBC,TP53,ESR1,GRB2,SRC,EP300,TRAF6,HDAC1,MYC,AR,EGFR,JUN,BRCA1,IKBKG,CSNK2A1,CTNNB1,MAPK1,IKBKE,PIK3R1,FYN,MDM2,ABL1,AKT1,PRKCA,RELA,HDAC2,UBE2I,SMAD4,PRKACA,UBB,MAPK3,PTPN11,NCOR1,LCK,CBL,SHC1,RPS27A,HDAC3,PARP1…
GO:BP	heterocycle metabolic process	GO:0046483	1.79E-41	40.74607924	5852	618	370	17847	RORC,SNRPF,CLNS1A,LPIN2,TMEM14C,PSRC1,NFE2,GMDS,SEPHS1,AIMP2,PRAMEF6,UBE2D3,HFE2,ANKRD1,COMP,NR1H2,CSDA,PFKFB4,DUX4,PHIP,FHL2,NIPBL,EXOSC1,NBL1,SIRT2,PRKCD,NR4A1,BAG3,SNRPN,TRIB1,PSMC2,PRAMEF10,CD320,ZMYM6,MYOCD,TXN,MEN1,HFE,RPUSD1,MRPS11,ACACA,RFC4,TOP2A,BHLHB3,ZNF93,ZNF135,POP5,TGFB3,RXRA,SCD,FOLR1,CHRNA4,AATF,TNNI2,GTF2E2,IRF5,EPAS1,VEZF1,RPS26,TACC1,H2AFZ,DERA,RUNX2,FOS,MTO1,RUNX1,SOX11,RAF1,…
GO:BP	response to stimulus	GO:0050896	2.00E-41	40.69964765	9379	618	490	17847	RNF220,RORC,ACTR1B,LPIN2,CMTM8,CALML6,LRRC8A,JSRP1,NFE2,GMDS,UBE2D3,COL2A1,MT1G,SLC13A5,HFE2,PTPN6,STK38,ANKRD1,ATP6AP2,COMP,OR4F17,NR1H2,RUFY4,CSDA,CEP250,NPHP1,MYH6,EFNB1,ATP6V1B2,SIGLEC10,FRAT2,PHIP,RAB8A,FHL2,NIPBL,NBL1,PPFIA1,SIRT2,PRKCD,TSLP,S100P,NR4A1,BAG3,RYR1,SNRPN,TRIB1,BOC,TCAP,IL17B,PSMC2,IL13RA1,PLA2G2A,PLXNB1,CD320,GRM3,CD8B,MYOCD,TXN,MYOM1,TUBB2B,ADIPOR2,MIR99A,MEN1,HFE,MRPS11,TIA…
GO:BP	regulation of protein modification process	GO:0031399	2.62E-41	40.58229212	1888	618	190	17847	TMEM119,PSRC1,AIMP2,PTPN6,STK38,ATP6AP2,PHIP,NIPBL,SIRT2,PRKCD,TSLP,TRIB1,PLA2G2A,MYOCD,TXN,MEN1,HFE,TGFB3,APLNR,FGG,RAF1,MAGED1,WNT7A,CDKN2A,MYOZ1,CTDSP2,UBA52,VEGFA,UBC,TP53,GRB2,SRC,EP300,TRAF6,MYC,AR,EGFR,JUN,BRCA1,IKBKG,YWHAG,CTNNB1,MAPK1,FYN,ABL1,AKT1,RB1,PRKCA,ACTB,RELA,HDAC2,UBE2I,SMAD4,STAT3,PRKACA,UBB,MAPK3,PTPN11,PRKDC,NCOR1,CBL,SHC1,YWHAB,SIN3A,RPS27A,HDAC3,PML,TGFBR1,PPP2CA,YWHAE,NPM…
GO:BP	negative regulation of transcription, DNA-templated	GO:0045892	4.79E-41	40.32007699	1229	618	150	17847	RORC,PRAMEF6,UBE2D3,HFE2,ANKRD1,NR1H2,CSDA,FHL2,NIPBL,SIRT2,BAG3,PRAMEF10,MYOCD,TXN,MEN1,BHLHB3,ZNF93,RXRA,RUNX2,RUNX1,SOX11,MAGED1,CDKN2A,TPR,MYOZ1,UBA52,VEGFA,UBC,TP53,ESR1,SRC,EP300,CREBBP,TRAF6,HDAC1,MYC,AR,SMAD3,JUN,SMAD2,BRCA1,CTNNB1,MDM2,NR3C1,RB1,RELA,HDAC2,UBE2I,SMAD4,NFKB1,STAT3,UBB,RARA,PCNA,VHL,NCOR1,SHC1,YWHAQ,YWHAB,SIN3A,RPS27A,HDAC3,PARP1,PML,SMARCA4,HSPA8,NCOR2,STAT1,PPARG,CEBPB,S…
GO:BP	negative regulation of RNA metabolic process	GO:0051253	5.46E-41	40.26275798	1372	618	159	17847	RORC,PRAMEF6,UBE2D3,HFE2,ANKRD1,NR1H2,CSDA,FHL2,NIPBL,SIRT2,BAG3,PRAMEF10,MYOCD,TXN,MEN1,BHLHB3,ZNF93,RXRA,RPS26,RUNX2,RUNX1,SOX11,MAGED1,CDKN2A,TPR,MYOZ1,UBA52,VEGFA,UBC,TP53,ESR1,SRC,EP300,CREBBP,TRAF6,HDAC1,MYC,AR,SMAD3,JUN,SMAD2,BRCA1,CTNNB1,MDM2,NR3C1,RB1,RELA,HDAC2,UBE2I,SMAD4,NFKB1,STAT3,UBB,RARA,PCNA,VHL,NCOR1,SHC1,YWHAQ,YWHAB,SIN3A,RPS27A,HDAC3,PARP1,PML,SMARCA4,HSPA8,NCOR2,STAT1,RUVBL2,…
GO:BP	regulation of phosphate metabolic process	GO:0019220	5.69E-41	40.2447451	1827	618	186	17847	TMEM119,PSRC1,PTPN6,STK38,ATP6AP2,PFKFB4,PHIP,SIRT2,PRKCD,TSLP,TRIB1,PLA2G2A,MYOCD,TXN,MEN1,HFE,TGFB3,APLNR,FGG,RAF1,MAGED1,WNT7A,MIR210,CDKN2A,RAE1,TPR,MYOZ1,CTDSP2,UBA52,VEGFA,UBC,TP53,GRB2,SRC,TRAF6,MYC,AR,EGFR,SMAD3,JUN,IKBKG,YWHAG,CTNNB1,MAPK1,PIK3R1,FYN,ABL1,AKT1,RB1,PRKCA,ACTB,HDAC2,SMAD4,STAT3,PRKACA,UBB,MAPK3,PTPN11,PRKDC,NCOR1,CBL,SHC1,YWHAB,RPS27A,HDAC3,PARP1,PML,TGFBR1,PPP2CA,YWHAE,NP…
GO:BP	cell cycle	GO:0007049	6.01E-41	40.22148497	1863	618	188	17847	ACTR1B,CLTA,PSRC1,CCNDBP1,PTPN6,CDC123,CEP250,DUX4,PHIP,NIPBL,SIRT2,PRKCD,NR4A1,PSMC2,MYOCD,TUBB2B,CKAP5,MEN1,RFC4,TOP2A,NEK6,RPS6KA2,AATF,ASNS,TACC1,SOX11,CDKN2A,RAE1,CDK2AP2,TPR,PSMA5,CTDSP2,KLHL21,NSMCE2,TP53,SRC,EP300,MYC,EGFR,SMAD3,JUN,BRCA1,CSNK2A1,YWHAG,CTNNB1,MAPK1,MDM2,ABL1,AKT1,NR3C1,RB1,PRKCA,ACTB,UBE2I,STAT3,PRKACA,UBB,RARA,PCNA,MAPK3,PTPN11,PRKDC,NCOR1,SIN3A,HDAC3,PML,TGFBR1,PPP2CA,Y…
GO:BP	regulation of phosphorus metabolic process	GO:0051174	6.68E-41	40.17512413	1829	618	186	17847	TMEM119,PSRC1,PTPN6,STK38,ATP6AP2,PFKFB4,PHIP,SIRT2,PRKCD,TSLP,TRIB1,PLA2G2A,MYOCD,TXN,MEN1,HFE,TGFB3,APLNR,FGG,RAF1,MAGED1,WNT7A,MIR210,CDKN2A,RAE1,TPR,MYOZ1,CTDSP2,UBA52,VEGFA,UBC,TP53,GRB2,SRC,TRAF6,MYC,AR,EGFR,SMAD3,JUN,IKBKG,YWHAG,CTNNB1,MAPK1,PIK3R1,FYN,ABL1,AKT1,RB1,PRKCA,ACTB,HDAC2,SMAD4,STAT3,PRKACA,UBB,MAPK3,PTPN11,PRKDC,NCOR1,CBL,SHC1,YWHAB,RPS27A,HDAC3,PARP1,PML,TGFBR1,PPP2CA,YWHAE,NP…
GO:BP	response to growth factor	GO:0070848	9.19E-41	40.03673396	736	618	115	17847	UBE2D3,COL2A1,MT1G,HFE2,ANKRD1,COMP,NBL1,SIRT2,NR4A1,MYOCD,MEN1,HFE,TGFB3,CLDN5,FOLR1,RUNX2,FOS,SOX11,RAF1,WNT7A,TPR,UBA52,VEGFA,UBC,TP53,GRB2,SRC,EP300,CREBBP,MYC,EGFR,SMAD3,JUN,SMAD2,CTNNB1,MAPK1,FYN,MDM2,ABL1,AKT1,NR3C1,RELA,HDAC2,SMAD4,UBB,MAPK3,PTPN11,PLCG1,CBL,SHC1,RPS27A,PARP1,PML,TGFBR1,CRK,MCM7,EEF1A1,SMAD1,POLR2A,MAPK14,ERBB2,PIN1,HIF1A,PRKCZ,SIRT1,APP,STUB1,SMURF1,HGS,ARF6,SMURF2,CREB1…
GO:BP	cellular developmental process	GO:0048869	9.86E-41	40.00607495	4470	618	313	17847	RORC,PARVG,TMEM119,TMEM14C,LRRC8A,NFE2,AIMP2,PRAMEF6,COL2A1,MT1G,PTPN6,ANKRD1,COMP,NR1H2,ODF4,NPHP1,MYH6,PMP22,EFNB1,FMNL3,PHIP,RAB8A,FHL2,NIPBL,NBL1,SIRT2,PRKCD,NR4A1,RYR1,TRIB1,BOC,TCAP,PSMC2,MYL2,PLA2G2A,PRAMEF10,PLXNB1,ZMYM6,MYOCD,MYOM1,TUBB2B,PPDPF,TNNT3,MEN1,S100A4,TOP2A,BHLHB3,ZNF135,UNC45A,TGFB3,RXRA,VCAN,MYH11,NEK6,CLDN5,APLNR,FOLR1,C9ORF47,RPS6KA2,FLNB,EPAS1,CAP1,VEZF1,MB,FGG,RUNX2,FOS,…
GO:BP	symbiotic process	GO:0044403	1.30E-40	39.88693488	886	618	126	17847	TRAM1,CD8B,TOP2A,RXRA,RAB1B,RPS26,RAE1,TPR,UBA52,UBC,TP53,GRB2,SRC,EP300,CREBBP,HDAC1,EGFR,SMAD3,JUN,IKBKG,CTNNB1,MAPK1,IKBKE,PIK3R1,FYN,MDM2,RB1,RELA,SP1,UBE2I,STAT3,UBB,PCNA,MAPK3,PLCG1,LCK,CBL,SHC1,YWHAB,RPS27A,PML,SMARCA4,HSPA8,YWHAE,H2AFX,NPM1,STAT1,NFKBIA,TBP,SUMO1,TNFRSF1A,LYN,IKBKB,VIM,POLR2A,CDK1,DAXX,SYK,SIRT1,XRCC5,DHX9,HTATIP,CDK9,CASP8,TRIM28,CDC42,CREB1,CAV1,HSPA1A,CDH1,BCL2,PPP1CA,…
GO:BP	cellular macromolecule metabolic process	GO:0044260	3.06E-40	39.51426477	8362	618	456	17847	RNF220,RORC,SNRPF,LPIN2,CLTA,TMEM119,SERPINA6,PSRC1,NFE2,SEPHS1,AIMP2,PRAMEF6,UBE2D3,COL2A1,HFE2,PTPN6,STK38,ANKRD1,ATP6AP2,COMP,NR1H2,CDC123,PPIAL4G,CSDA,MYH6,DUX4,MEPE,PHIP,RAB8A,FHL2,NIPBL,EXOSC1,NBL1,SIRT2,PRKCD,TSLP,NR4A1,BAG3,TRIB1,MRPL14,PSMC2,PLA2G2A,PRAMEF10,ZMYM6,MYOCD,TXN,MEN1,DCAF7,HFE,MRPS11,RFC4,TOP2A,MRPS30,BHLHB3,ZNF93,ZNF135,TGFB3,RXRA,VCAN,UCHL3,NEK6,APLNR,CHRNA4,RPS6KA2,RAB1B,A…
GO:BP	regulation of cell differentiation	GO:0045595	3.42E-40	39.46595883	1903	618	189	17847	RORC,TMEM119,NFE2,PRAMEF6,PTPN6,ANKRD1,NR1H2,PMP22,NIPBL,NBL1,SIRT2,TRIB1,BOC,PSMC2,PLA2G2A,PRAMEF10,PLXNB1,MYOCD,TUBB2B,MEN1,BHLHB3,TGFB3,CLDN5,C9ORF47,VEZF1,FGG,RUNX2,FOS,RUNX1,SOX11,RAF1,WNT7A,MIR210,CDKN2A,PSMA5,VEGFA,TP53,EP300,CREBBP,TRAF6,HDAC1,MYC,AR,EGFR,SMAD3,JUN,SMAD2,YWHAG,CTNNB1,MAPK1,PIK3R1,FYN,MDM2,ABL1,AKT1,RB1,PRKCA,RELA,HDAC2,SMAD4,NFKB1,STAT3,PRKACA,RARA,VHL,SIN3A,PARP1,TGFBR1,…
GO:BP	anatomical structure development	GO:0048856	4.02E-40	39.39623821	6028	618	374	17847	RORC,PARVG,TMEM119,CMTM8,TMEM14C,CRELD1,LRRC8A,NFE2,AIMP2,COL2A1,MT1G,PTPN6,ANKRD1,ATP6AP2,COMP,NR1H2,CSDA,ODF4,NPHP1,MYH6,PMP22,EFNB1,DUX4,MEPE,MFAP2,FMNL3,FRAT2,PHIP,RAB8A,FHL2,NIPBL,NBL1,SIRT2,NR4A1,BAG3,WDR72,RYR1,TRIB1,BOC,TCAP,PSMC2,MYL2,SLC38A10,PLXNB1,ZMYM6,MYOCD,MYOM1,TUBB2B,PPDPF,TNNT3,ADIPOR2,MEN1,DCAF7,HFE,COX17,S100A4,HSPB7,TOP2A,SCRG1,BHLHB3,ZNF135,UNC45A,TGFB3,RXRA,VCAN,INF2,CSN3,K…
GO:BP	positive regulation of molecular function	GO:0044093	5.97E-40	39.22375798	1786	618	182	17847	PSRC1,AIMP2,NR1H2,NIPBL,SIRT2,PRKCD,PLXNB1,MYOCD,TXN,MEN1,HFE,TIAM2,COX17,RFC4,TGFB3,CLDN5,TACC1,ATP2A1,RAF1,SGK1,MAGED1,CLN5,CDKN2A,UBA52,VEGFA,UBC,ESR1,SRC,EP300,TRAF6,MYC,AR,EGFR,SMAD3,JUN,IKBKG,CTNNB1,MAPK1,FYN,ABL1,AKT1,RB1,RELA,UBE2I,NFKB1,STAT3,PRKACA,UBB,RARA,PCNA,MAPK3,PTPN11,PLCG1,LCK,SHC1,YWHAB,RPS27A,PARP1,PML,SMARCA4,TGFBR1,PPP2CA,NPM1,CRK,NCOA3,GSK3B,PPARG,SUMO1,LYN,IKBKB,HDAC4,MAPK…
GO:BP	enzyme linked receptor protein signaling pathway	GO:0007167	1.10E-39	38.96007823	1062	618	137	17847	UBE2D3,HFE2,COMP,EFNB1,ATP6V1B2,PHIP,NBL1,SIRT2,PRKCD,CD8B,MYOCD,MEN1,HFE,TGFB3,CLDN5,FOLR1,RUNX2,FOS,SOX11,RAF1,UBA52,VEGFA,UBC,TP53,GRB2,SRC,EP300,CREBBP,AR,EGFR,SMAD3,JUN,SMAD2,CTNNB1,MAPK1,PIK3R1,FYN,ABL1,AKT1,PRKCA,ACTB,RELA,SMAD4,STAT3,UBB,MAPK3,PTPN11,PLCG1,LCK,CBL,SHC1,RPS27A,PARP1,PML,TGFBR1,CRK,GSK3B,SMAD1,LYN,VIM,NCK1,POLR2A,MAPK14,JAK2,SYK,ERBB2,PIN1,HIF1A,PRKCZ,SIRT1,APP,IRS1,STUB1,S…
GO:BP	negative regulation of nucleic acid-templated transcription	GO:1903507	1.78E-39	38.7496951	1281	618	151	17847	RORC,PRAMEF6,UBE2D3,HFE2,ANKRD1,NR1H2,CSDA,FHL2,NIPBL,SIRT2,BAG3,PRAMEF10,MYOCD,TXN,MEN1,BHLHB3,ZNF93,RXRA,RUNX2,RUNX1,SOX11,MAGED1,CDKN2A,TPR,MYOZ1,UBA52,VEGFA,UBC,TP53,ESR1,SRC,EP300,CREBBP,TRAF6,HDAC1,MYC,AR,SMAD3,JUN,SMAD2,BRCA1,CTNNB1,MDM2,NR3C1,RB1,RELA,HDAC2,UBE2I,SMAD4,NFKB1,STAT3,UBB,RARA,PCNA,VHL,NCOR1,SHC1,YWHAQ,YWHAB,SIN3A,RPS27A,HDAC3,PARP1,PML,SMARCA4,HSPA8,NCOR2,STAT1,RUVBL2,PPARG,…
GO:BP	system development	GO:0048731	2.02E-39	38.69399392	4967	618	331	17847	RORC,TMEM119,CMTM8,TMEM14C,CRELD1,LRRC8A,NFE2,AIMP2,COL2A1,MT1G,PTPN6,ANKRD1,ATP6AP2,COMP,CSDA,NPHP1,MYH6,PMP22,EFNB1,MEPE,MFAP2,FMNL3,RAB8A,FHL2,NIPBL,NBL1,SIRT2,NR4A1,BAG3,WDR72,RYR1,TRIB1,BOC,TCAP,PSMC2,MYL2,SLC38A10,PLXNB1,MYOCD,MYOM1,TUBB2B,ADIPOR2,MEN1,HFE,COX17,S100A4,HSPB7,TOP2A,SCRG1,BHLHB3,UNC45A,TGFB3,RXRA,VCAN,CSN3,KLK4,MYH11,CLDN5,APLNR,FOLR1,RPS6KA2,FLNB,ASNS,EPAS1,VEZF1,XIRP2,MB,TA…
GO:BP	negative regulation of RNA biosynthetic process	GO:1902679	2.16E-39	38.66550293	1283	618	151	17847	RORC,PRAMEF6,UBE2D3,HFE2,ANKRD1,NR1H2,CSDA,FHL2,NIPBL,SIRT2,BAG3,PRAMEF10,MYOCD,TXN,MEN1,BHLHB3,ZNF93,RXRA,RUNX2,RUNX1,SOX11,MAGED1,CDKN2A,TPR,MYOZ1,UBA52,VEGFA,UBC,TP53,ESR1,SRC,EP300,CREBBP,TRAF6,HDAC1,MYC,AR,SMAD3,JUN,SMAD2,BRCA1,CTNNB1,MDM2,NR3C1,RB1,RELA,HDAC2,UBE2I,SMAD4,NFKB1,STAT3,UBB,RARA,PCNA,VHL,NCOR1,SHC1,YWHAQ,YWHAB,SIN3A,RPS27A,HDAC3,PARP1,PML,SMARCA4,HSPA8,NCOR2,STAT1,RUVBL2,PPARG,…
GO:BP	cellular response to growth factor stimulus	GO:0071363	2.22E-39	38.6541548	707	618	111	17847	UBE2D3,COL2A1,MT1G,HFE2,ANKRD1,COMP,NBL1,SIRT2,NR4A1,MYOCD,MEN1,HFE,TGFB3,CLDN5,FOLR1,RUNX2,FOS,SOX11,RAF1,WNT7A,UBA52,VEGFA,UBC,TP53,GRB2,SRC,EP300,CREBBP,EGFR,SMAD3,JUN,SMAD2,CTNNB1,MAPK1,FYN,MDM2,ABL1,AKT1,NR3C1,RELA,HDAC2,SMAD4,UBB,MAPK3,PTPN11,PLCG1,CBL,SHC1,RPS27A,PARP1,PML,TGFBR1,CRK,MCM7,EEF1A1,SMAD1,POLR2A,MAPK14,ERBB2,PIN1,HIF1A,PRKCZ,SIRT1,APP,STUB1,SMURF1,HGS,ARF6,SMURF2,CREB1,CAV1,E2…
GO:BP	response to organic cyclic compound	GO:0014070	2.93E-39	38.53244858	983	618	131	17847	RORC,ANKRD1,NR1H2,FHL2,SIRT2,NR4A1,RYR1,SLC3A2,TGFB3,RXRA,FOLR1,ASNS,H2AFZ,FOS,RUNX1,WNT7A,ACTA1,DDX18,RAE1,ESR1,SRC,EP300,HDAC1,AR,EGFR,JUN,SMAD2,BRCA1,CTNNB1,MAPK1,MDM2,ABL1,AKT1,NR3C1,RB1,ACTB,RELA,HDAC2,NFKB1,STAT3,PRKACA,RARA,PCNA,MAPK3,NCOR1,CBL,SIN3A,PARP1,SMARCA4,TGFBR1,NCOR2,NPM1,STAT1,NFKBIA,NCOA1,NCOA3,RUVBL2,GSK3B,PPARG,CEBPB,LYN,POLR2A,JAK2,FLNA,CDK1,DAXX,CDKN1A,SIRT1,VDR,APP,DHX9,HT…
GO:BP	regulation of cell population proliferation	GO:0042127	3.08E-39	38.51077432	1719	618	177	17847	TMEM119,AIMP2,PRAMEF6,PTPN6,COMP,CDC123,PMP22,EFNB1,DUX4,PHIP,SIRT2,TSLP,NR4A1,TRIB1,PLA2G2A,PRAMEF10,PLXNB1,CD320,MYOCD,MEN1,COX17,TGFB3,APLNR,C9ORF47,RPS6KA2,TNS3,RUNX2,SOX11,RAF1,SGK1,MAGED1,WNT7A,CDKN2A,VEGFA,TP53,ESR1,SRC,TRAF6,HDAC1,MYC,AR,EGFR,SMAD3,JUN,SMAD2,BRCA1,CSNK2A1,CTNNB1,MAPK1,FYN,MDM2,ABL1,AKT1,RB1,PRKCA,RELA,SP1,HDAC2,SMAD4,STAT3,MCC,RARA,VHL,PRKDC,PLCG1,LCK,SHC1,PML,TGFBR1,NPM1…
GO:BP	viral process	GO:0016032	4.62E-39	38.33561546	832	618	120	17847	TRAM1,CD8B,TOP2A,RXRA,RAB1B,RPS26,RAE1,TPR,UBA52,UBC,TP53,GRB2,SRC,EP300,CREBBP,HDAC1,EGFR,SMAD3,JUN,IKBKG,CTNNB1,MAPK1,IKBKE,PIK3R1,FYN,MDM2,RB1,RELA,SP1,UBE2I,STAT3,UBB,PCNA,MAPK3,PLCG1,LCK,SHC1,YWHAB,RPS27A,PML,SMARCA4,HSPA8,YWHAE,H2AFX,NPM1,STAT1,NFKBIA,TBP,SUMO1,TNFRSF1A,LYN,IKBKB,VIM,POLR2A,CDK1,DAXX,SYK,SIRT1,XRCC5,DHX9,HTATIP,CDK9,CASP8,TRIM28,CDC42,CREB1,CAV1,HSPA1A,BCL2,PPP1CA,XPO1,CEBP…
GO:BP	cellular protein modification process	GO:0006464	4.65E-39	38.33286684	4196	618	298	17847	RNF220,TMEM119,PSRC1,SEPHS1,AIMP2,UBE2D3,PTPN6,STK38,ATP6AP2,PPIAL4G,MYH6,MEPE,PHIP,RAB8A,NIPBL,SIRT2,PRKCD,TSLP,TRIB1,PSMC2,PLA2G2A,MYOCD,TXN,MEN1,DCAF7,HFE,TGFB3,VCAN,UCHL3,NEK6,APLNR,RPS6KA2,RAB1B,EPAS1,FGG,RAF1,SGK1,MAGED1,UBA1,WNT7A,FBXL20,CDKN2A,RAE1,TPR,PSMA5,MYOZ1,DAD1,CTDSP2,KLHL21,UBA52,NSMCE2,VEGFA,UBC,TP53,ESR1,GRB2,SRC,EP300,CREBBP,TRAF6,HDAC1,MYC,AR,EGFR,SMAD3,JUN,SMAD2,BRCA1,IKBKG,…
GO:BP	protein modification process	GO:0036211	4.65E-39	38.33286684	4196	618	298	17847	RNF220,TMEM119,PSRC1,SEPHS1,AIMP2,UBE2D3,PTPN6,STK38,ATP6AP2,PPIAL4G,MYH6,MEPE,PHIP,RAB8A,NIPBL,SIRT2,PRKCD,TSLP,TRIB1,PSMC2,PLA2G2A,MYOCD,TXN,MEN1,DCAF7,HFE,TGFB3,VCAN,UCHL3,NEK6,APLNR,RPS6KA2,RAB1B,EPAS1,FGG,RAF1,SGK1,MAGED1,UBA1,WNT7A,FBXL20,CDKN2A,RAE1,TPR,PSMA5,MYOZ1,DAD1,CTDSP2,KLHL21,UBA52,NSMCE2,VEGFA,UBC,TP53,ESR1,GRB2,SRC,EP300,CREBBP,TRAF6,HDAC1,MYC,AR,EGFR,SMAD3,JUN,SMAD2,BRCA1,IKBKG,…
GO:BP	cellular response to cytokine stimulus	GO:0071345	4.94E-39	38.306705	1121	618	140	17847	RORC,PTPN6,ANKRD1,NR1H2,RUFY4,CSDA,PRKCD,TSLP,PSMC2,IL13RA1,ADIPOR2,MIR99A,MT2A,FLNB,IRF5,FGG,SYNGR1,FOS,RUNX1,TPR,PSMA5,UBA52,VEGFA,UBC,TP53,YWHAZ,GRB2,TRAF6,MYC,SMAD3,BRCA1,IKBKG,MAPK1,IKBKE,PIK3R1,FYN,AKT1,RELA,SMAD4,NFKB1,STAT3,PRKACA,UBB,MAPK3,PTPN11,CBL,SHC1,RPS27A,PML,SMARCA4,HSPA8,STAT1,NFKBIA,CRK,GSK3B,PPARG,CEBPB,SUMO1,TNFRSF1A,IKBKB,VIM,HDAC4,MAPK14,JAK2,SYK,CDKN1A,HIF1A,SIRT1,XRCC5,MA…
GO:BP	positive regulation of cellular component organization	GO:0051130	6.62E-39	38.17914524	1216	618	146	17847	PSRC1,UBE2D3,ANKRD1,NPHP1,PHIP,NIPBL,SIRT2,PRKCD,ESPN,PSMC2,PLXNB1,TUBB2B,HFE,TGFB3,CLDN5,FGG,WNT7A,SLN,SYNPO2L,TPR,NSMCE2,VEGFA,TP53,YWHAZ,ESR1,GRB2,SRC,EP300,AR,SMAD3,BRCA1,YWHAG,CTNNB1,MAPK1,FYN,ABL1,RB1,SMAD4,MAPK3,CBL,YWHAQ,YWHAB,SIN3A,PARP1,PML,TGFBR1,YWHAE,CRK,RUVBL2,GSK3B,PPARG,SUMO1,LYN,NCK1,HDAC4,MAPK14,FLNA,SYK,HIF1A,SIRT1,XRCC5,CSNK2A2,APP,RIF1,STUB1,SFN,SMURF1,TERF1,CDK9,ATM,MAPK8,CA…
GO:BP	negative regulation of programmed cell death	GO:0043069	2.21E-38	37.65634779	943	618	127	17847	PRAMEF6,COL2A1,COMP,CSDA,PHIP,FHL2,PRKCD,TSLP,NR4A1,BAG3,PRAMEF10,MYOCD,TGFB3,AATF,ASNS,FGG,RAF1,WNT7A,MIR210,DAD1,UBA52,VEGFA,UBC,TP53,YWHAZ,SRC,TRAF6,HDAC1,MYC,AR,EGFR,SMAD3,JUN,BRCA1,CSNK2A1,CTNNB1,PIK3R1,FYN,MDM2,ABL1,AKT1,RB1,PRKCA,RELA,HDAC2,NFKB1,STAT3,UBB,RARA,VHL,PRKDC,CBL,SHC1,SIN3A,RPS27A,HDAC3,TGFBR1,YWHAE,NPM1,NFKBIA,GSK3B,CEBPB,IKBKB,JAK2,FLNA,CDK1,PIN1,CDKN1A,HIF1A,PRKCZ,PLK1,SIRT1…
GO:BP	cellular response to oxygen-containing compound	GO:1901701	3.76E-38	37.42454878	1218	618	145	17847	RORC,LPIN2,ANKRD1,NR1H2,ATP6V1B2,PHIP,RAB8A,SIRT2,PRKCD,NR4A1,TRIB1,TXN,MEN1,ACACA,FOLR1,CHRNA4,RPS6KA2,H2AFZ,FOS,RAF1,DDX18,TP53,ESR1,GRB2,SRC,TRAF6,AR,EGFR,JUN,BRCA1,YWHAG,CTNNB1,MAPK1,PIK3R1,FYN,MDM2,ABL1,AKT1,NR3C1,PRKCA,ACTB,RELA,SP1,HDAC2,NFKB1,STAT3,PRKACA,RARA,PCNA,MAPK3,PTPN11,PRKDC,SHC1,SIN3A,PARP1,SMARCA4,STAT1,NFKBIA,CRK,NCOA3,RUVBL2,GSK3B,PPARG,CEBPB,LYN,VIM,NCK1,MAPK14,JAK2,FLNA,CDK…
GO:BP	organelle organization	GO:0006996	4.58E-38	37.33918987	3920	618	284	17847	ACTR1B,PARVG,ACTR6,CIDEC,SAMM50,PSRC1,NFE2,UBE2D3,ANKRD1,RUFY4,CEP250,NPHP1,MYH6,ATP6V1B2,FMNL3,PHIP,RAB8A,NIPBL,PPFIA1,SIRT2,PRKCD,FOXRED1,BAG3,TCAP,ESPN,MYL2,PLXNB1,ZMYM6,MYOCD,MYOM1,TUBB2B,CKAP5,CENPN,TNNT3,MEN1,MRPS11,COX17,PRPH,RFC4,TOP2A,ZNF135,TGFB3,INF2,MYH11,NEK6,FOLR1,RPS6KA2,RAB1B,FLNB,EPAS1,CAP1,XIRP2,TACC1,H2AFZ,PIP5K1C,CYTH2,ATP2A1,RAF1,CLN5,ACTA1,DHX30,CDKN2A,RAE1,SYNPO2L,TSPY2,CDK…
GO:BP	interspecies interaction between organisms	GO:0044419	5.14E-38	37.28907987	936	618	126	17847	TRAM1,CD8B,TOP2A,RXRA,RAB1B,RPS26,RAE1,TPR,UBA52,UBC,TP53,GRB2,SRC,EP300,CREBBP,HDAC1,EGFR,SMAD3,JUN,IKBKG,CTNNB1,MAPK1,IKBKE,PIK3R1,FYN,MDM2,RB1,RELA,SP1,UBE2I,STAT3,UBB,PCNA,MAPK3,PLCG1,LCK,CBL,SHC1,YWHAB,RPS27A,PML,SMARCA4,HSPA8,YWHAE,H2AFX,NPM1,STAT1,NFKBIA,TBP,SUMO1,TNFRSF1A,LYN,IKBKB,VIM,POLR2A,CDK1,DAXX,SYK,SIRT1,XRCC5,DHX9,HTATIP,CDK9,CASP8,TRIM28,CDC42,CREB1,CAV1,HSPA1A,CDH1,BCL2,PPP1CA,…
GO:BP	cellular nitrogen compound metabolic process	GO:0034641	5.83E-38	37.23446959	6441	618	385	17847	RORC,SNRPF,CLNS1A,LPIN2,TMEM14C,PSRC1,NFE2,GMDS,SEPHS1,AIMP2,PRAMEF6,UBE2D3,HFE2,ANKRD1,ATP6AP2,COMP,NR1H2,CDC123,CSDA,PFKFB4,DUX4,PHIP,FHL2,NIPBL,EXOSC1,NBL1,SIRT2,PRKCD,NR4A1,BAG3,SNRPN,TRIB1,MRPL14,PSMC2,PRAMEF10,ZMYM6,MYOCD,TXN,MEN1,HFE,RPUSD1,MRPS11,ACACA,RFC4,TOP2A,MRPS30,BHLHB3,ZNF93,ZNF135,POP5,TGFB3,RXRA,SCD,FOLR1,CHRNA4,AATF,TNNI2,GTF2E2,ASNS,IRF5,EPAS1,VEZF1,RPS26,TACC1,H2AFZ,DERA,RUNX…
GO:BP	regulation of cell cycle	GO:0051726	6.14E-38	37.21211218	1223	618	145	17847	PSRC1,CCNDBP1,PTPN6,CDC123,CEP250,DUX4,PHIP,NIPBL,SIRT2,NR4A1,PSMC2,MYOCD,CKAP5,MEN1,TOP2A,NEK6,RPS6KA2,AATF,ASNS,SOX11,CDKN2A,RAE1,CDK2AP2,TPR,PSMA5,CTDSP2,KLHL21,NSMCE2,TP53,SRC,EP300,MYC,EGFR,SMAD3,JUN,BRCA1,CSNK2A1,YWHAG,CTNNB1,MDM2,ABL1,AKT1,RB1,PRKCA,ACTB,STAT3,PRKACA,RARA,PCNA,PTPN11,PRKDC,SIN3A,PML,TGFBR1,YWHAE,H2AFX,NPM1,PPP2R1A,TUBB,MAPK14,CDK1,PIN1,CDKN1A,PLK1,SIRT1,PRKAB1,RBBP4,CSNK2A…
GO:BP	organic cyclic compound metabolic process	GO:1901360	6.81E-38	37.16688106	6122	618	373	17847	RORC,SNRPF,CLNS1A,HPDL,LPIN2,SERPINA6,TMEM14C,PSRC1,NFE2,GMDS,SEPHS1,AIMP2,PRAMEF6,UBE2D3,HFE2,ANKRD1,COMP,NR1H2,CSDA,PFKFB4,DUX4,PHIP,FHL2,NIPBL,EXOSC1,NBL1,SIRT2,PRKCD,NR4A1,BAG3,SNRPN,TRIB1,PSMC2,PRAMEF10,CD320,ZMYM6,MYOCD,TXN,MEN1,HFE,RPUSD1,MRPS11,ACACA,RFC4,TOP2A,BHLHB3,ZNF93,ZNF135,POP5,TGFB3,RXRA,SCD,FOLR1,CHRNA4,AATF,TNNI2,GTF2E2,IRF5,EPAS1,VEZF1,RPS26,TACC1,H2AFZ,DERA,RUNX2,FOS,MTO1,RUN…
GO:BP	multicellular organism development	GO:0007275	1.07E-37	36.97225959	5532	618	350	17847	RORC,TMEM119,CMTM8,TMEM14C,CRELD1,LRRC8A,NFE2,AIMP2,COL2A1,MT1G,PTPN6,ANKRD1,ATP6AP2,COMP,NR1H2,CSDA,ODF4,NPHP1,MYH6,PMP22,EFNB1,DUX4,MEPE,MFAP2,FMNL3,FRAT2,RAB8A,FHL2,NIPBL,NBL1,SIRT2,NR4A1,BAG3,WDR72,RYR1,TRIB1,BOC,TCAP,PSMC2,MYL2,SLC38A10,PLXNB1,ZMYM6,MYOCD,MYOM1,TUBB2B,PPDPF,ADIPOR2,MEN1,DCAF7,HFE,COX17,S100A4,HSPB7,TOP2A,SCRG1,BHLHB3,UNC45A,TGFB3,RXRA,VCAN,CSN3,KLK4,MYH11,CLDN5,APLNR,FOLR1,C…
GO:BP	negative regulation of apoptotic process	GO:0043066	2.78E-37	36.55626651	922	618	124	17847	PRAMEF6,COL2A1,COMP,CSDA,PHIP,FHL2,PRKCD,TSLP,NR4A1,BAG3,PRAMEF10,MYOCD,TGFB3,AATF,ASNS,FGG,RAF1,WNT7A,MIR210,DAD1,UBA52,VEGFA,UBC,TP53,YWHAZ,SRC,TRAF6,HDAC1,MYC,AR,EGFR,SMAD3,JUN,BRCA1,CSNK2A1,CTNNB1,PIK3R1,FYN,MDM2,ABL1,AKT1,RB1,PRKCA,RELA,HDAC2,NFKB1,STAT3,UBB,RARA,VHL,PRKDC,CBL,SHC1,SIN3A,RPS27A,HDAC3,TGFBR1,YWHAE,NPM1,NFKBIA,GSK3B,CEBPB,IKBKB,JAK2,FLNA,CDK1,PIN1,CDKN1A,HIF1A,PRKCZ,PLK1,SIRT1…
GO:BP	regulation of biological quality	GO:0065008	4.52E-37	36.34509414	4103	618	290	17847	CLNS1A,TPCN1,TMEM119,SERPINA6,TMEM14C,LRRC8A,JSRP1,NFE2,COL2A1,MT1G,HFE2,PTPN6,ATP6AP2,COMP,NR1H2,CSDA,MYH6,MFAP2,ATP6V1B2,FMNL3,PHIP,RAB8A,EXOSC1,NBL1,PPFIA1,PRKCD,BAG3,RYR1,PSMC2,MYL2,PLXNB1,TXN,ADIPOR2,MEN1,HFE,ACACA,RFC4,GCAT,MT2A,CSN3,APLNR,SCD,CHRNA4,C9ORF47,RPS6KA2,HBG1,FLNB,EPAS1,MB,GRIK4,FGG,SYNGR1,PIP5K1C,MYH7,SOX11,ATP2A1,RAF1,SGK1,CLN5,WNT7A,SLN,MIR210,FBXL20,CDKN2A,TM6SF2,RALY,PSMA5,…
GO:BP	macromolecule modification	GO:0043412	4.57E-37	36.3402559	4407	618	303	17847	RNF220,TMEM119,PSRC1,SEPHS1,AIMP2,UBE2D3,PTPN6,STK38,ATP6AP2,PPIAL4G,MYH6,MEPE,PHIP,RAB8A,NIPBL,SIRT2,PRKCD,TSLP,TRIB1,PSMC2,PLA2G2A,MYOCD,TXN,MEN1,DCAF7,HFE,RPUSD1,TGFB3,VCAN,UCHL3,NEK6,APLNR,RPS6KA2,RAB1B,EPAS1,FGG,FOS,MTO1,RAF1,SGK1,MAGED1,UBA1,WNT7A,FBXL20,CDKN2A,RAE1,TPR,PSMA5,MYOZ1,DAD1,CTDSP2,KLHL21,UBA52,NSMCE2,VEGFA,UBC,TP53,ESR1,GRB2,SRC,EP300,CREBBP,TRAF6,HDAC1,MYC,AR,EGFR,SMAD3,JUN,SM…
GO:BP	cellular protein metabolic process	GO:0044267	8.02E-37	36.09593403	5324	618	340	17847	RNF220,CLTA,TMEM119,SERPINA6,PSRC1,SEPHS1,AIMP2,UBE2D3,PTPN6,STK38,ATP6AP2,NR1H2,CDC123,PPIAL4G,CSDA,MYH6,MEPE,PHIP,RAB8A,NIPBL,SIRT2,PRKCD,TSLP,NR4A1,TRIB1,MRPL14,PSMC2,PLA2G2A,MYOCD,TXN,MEN1,DCAF7,HFE,MRPS11,MRPS30,TGFB3,RXRA,VCAN,UCHL3,NEK6,APLNR,RPS6KA2,RAB1B,EPAS1,RPS26,TMUB1,FGG,MRPL53,RAF1,SGK1,MAGED1,UBA1,CLN5,WNT7A,MIR210,FBXL20,CDKN2A,RAE1,TPR,PSMA5,MYOZ1,DAD1,CTDSP2,KLHL21,UBA52,NSMCE2…
GO:BP	negative regulation of cellular macromolecule biosynthetic process	GO:2000113	1.21E-36	35.91718569	1500	618	160	17847	RORC,PRAMEF6,UBE2D3,HFE2,ANKRD1,NR1H2,CSDA,FHL2,NIPBL,SIRT2,BAG3,PRAMEF10,MYOCD,TXN,MEN1,BHLHB3,ZNF93,RXRA,AATF,RUNX2,RUNX1,SOX11,MAGED1,MIR210,CDKN2A,TPR,MYOZ1,UBA52,VEGFA,UBC,TP53,ESR1,SRC,EP300,CREBBP,TRAF6,HDAC1,MYC,AR,SMAD3,JUN,SMAD2,BRCA1,CTNNB1,MDM2,NR3C1,RB1,RELA,HDAC2,UBE2I,SMAD4,NFKB1,STAT3,UBB,RARA,PCNA,VHL,NCOR1,SHC1,YWHAQ,YWHAB,SIN3A,RPS27A,HDAC3,PARP1,PML,SMARCA4,HSPA8,NCOR2,STAT1,G…
GO:BP	peptidyl-amino acid modification	GO:0018193	2.10E-36	35.67683855	1276	618	146	17847	PTPN6,STK38,PPIAL4G,SIRT2,PRKCD,TSLP,MYOCD,TXN,MEN1,NEK6,RPS6KA2,RAF1,SGK1,CDKN2A,RAE1,TPR,DAD1,NSMCE2,VEGFA,TP53,SRC,EP300,CREBBP,EGFR,BRCA1,CSNK2A1,CTNNB1,MAPK1,IKBKE,FYN,MDM2,ABL1,AKT1,PRKCA,RELA,HDAC2,UBE2I,SMAD4,STAT3,PRKACA,MAPK3,PTPN11,PRKDC,LCK,CBL,SHC1,SIN3A,PARP1,TGFBR1,PPP2CA,NCOA1,NCOA3,RUVBL2,PPP2R1A,GSK3B,SUMO1,TNFRSF1A,LYN,IKBKB,SUMO2,NCK1,HDAC4,MAPK14,JAK2,CDK1,SYK,ERBB2,PIN1,PRKC…
GO:BP	anatomical structure morphogenesis	GO:0009653	2.55E-36	35.59274389	2764	618	227	17847	PARVG,TMEM119,COL2A1,PTPN6,ANKRD1,ATP6AP2,COMP,MYH6,PMP22,EFNB1,MFAP2,FMNL3,PHIP,RAB8A,FHL2,NIPBL,NBL1,NR4A1,WDR72,RYR1,BOC,TCAP,PSMC2,MYL2,PLXNB1,ZMYM6,MYOCD,MYOM1,TUBB2B,TNNT3,ADIPOR2,BHLHB3,ZNF135,TGFB3,RXRA,INF2,KLK4,MYH11,CLDN5,APLNR,FOLR1,C9ORF47,FLNB,EPAS1,CAP1,VEZF1,XIRP2,FGG,RUNX2,MYH7,RUNX1,SOX11,SGK1,MAGED1,WNT7A,MIR210,ACTA1,SYNPO2L,PSMA5,MYOZ1,FGD5,VEGFA,TP53,ESR1,GRB2,SRC,EP300,CREB…
GO:BP	cell differentiation	GO:0030154	2.65E-36	35.57742673	4279	618	296	17847	RORC,PARVG,TMEM119,TMEM14C,LRRC8A,NFE2,AIMP2,PRAMEF6,COL2A1,MT1G,PTPN6,ANKRD1,COMP,NR1H2,ODF4,NPHP1,MYH6,PMP22,EFNB1,RAB8A,FHL2,NIPBL,NBL1,SIRT2,NR4A1,RYR1,TRIB1,BOC,TCAP,PSMC2,MYL2,PLA2G2A,PRAMEF10,PLXNB1,MYOCD,MYOM1,TUBB2B,PPDPF,TNNT3,MEN1,S100A4,TOP2A,BHLHB3,UNC45A,TGFB3,RXRA,VCAN,MYH11,CLDN5,APLNR,FOLR1,C9ORF47,RPS6KA2,FLNB,EPAS1,VEZF1,MB,FGG,RUNX2,FOS,RUNX1,SOX11,RAF1,SGK1,CLN5,WNT7A,MIR210,…
GO:BP	positive regulation of cell death	GO:0010942	3.30E-36	35.48112178	748	618	110	17847	AIMP2,ANKRD1,SIRT2,PRKCD,NR4A1,TIAM2,TOP2A,TGFB3,RPS6KA2,IRF5,FOS,MAGED1,MIR210,CDKN2A,UBA52,UBC,TP53,YWHAZ,SRC,TRAF6,MYC,SMAD3,JUN,YWHAG,CTNNB1,FYN,ABL1,AKT1,UBB,PRKDC,PLCG1,LCK,YWHAQ,YWHAB,RPS27A,PARP1,PML,TGFBR1,YWHAE,NCOA1,PPP2R1A,GSK3B,PPARG,TNFRSF1A,LYN,NCK1,HDAC4,JAK2,DAXX,SYK,PIN1,CDKN1A,SIRT1,VDR,SFN,RNPS1,TERF1,ATM,MAPK8,CASP8,CDC42,APC,ZBTB16,VAV1,CREB1,CAV1,E2F1,YWHAH,CDK4,BCL2,PPP1CA…
GO:BP	organic substance biosynthetic process	GO:1901576	3.85E-36	35.41481383	6193	618	372	17847	RORC,SNRPF,LPIN2,TMEM14C,PSRC1,ENOPH1,NFE2,GMDS,SEPHS1,AIMP2,PRAMEF6,GK5,UBE2D3,HFE2,ANKRD1,COMP,NR1H2,CDC123,CSDA,DUX4,PHIP,FHL2,NIPBL,NBL1,SIRT2,PRKCD,NR4A1,BAG3,TRIB1,MRPL14,PSMC2,PLA2G2A,PRAMEF10,ZMYM6,MYOCD,TXN,ADIPOR2,MEN1,HFE,MRPS11,ACACA,RFC4,TOP2A,MRPS30,BHLHB3,ZNF93,ZNF135,TGFB3,RXRA,VCAN,SCD,AATF,TNNI2,GTF2E2,ASNS,IRF5,EPAS1,VEZF1,RPS26,TACC1,H2AFZ,PIP5K1C,DERA,RUNX2,FOS,RUNX1,SOX11,MR…
GO:BP	negative regulation of macromolecule biosynthetic process	GO:0010558	4.90E-36	35.30988367	1585	618	164	17847	RORC,PRAMEF6,UBE2D3,HFE2,ANKRD1,NR1H2,CSDA,FHL2,NIPBL,SIRT2,BAG3,PRAMEF10,MYOCD,TXN,MEN1,BHLHB3,ZNF93,RXRA,AATF,RUNX2,RUNX1,SOX11,MAGED1,MIR210,CDKN2A,TPR,MYOZ1,UBA52,VEGFA,UBC,TP53,ESR1,SRC,EP300,CREBBP,TRAF6,HDAC1,MYC,AR,SMAD3,JUN,SMAD2,BRCA1,CTNNB1,MDM2,NR3C1,RB1,RELA,HDAC2,UBE2I,SMAD4,NFKB1,STAT3,UBB,RARA,PCNA,VHL,NCOR1,SHC1,YWHAQ,YWHAB,SIN3A,RPS27A,HDAC3,PARP1,PML,SMARCA4,HSPA8,NCOR2,STAT1,R…
GO:BP	cell population proliferation	GO:0008283	5.17E-36	35.2869144	2052	618	190	17847	TMEM119,AIMP2,PRAMEF6,PTPN6,COMP,CDC123,PMP22,EFNB1,DUX4,FRAT2,PHIP,SIRT2,PRKCD,TSLP,NR4A1,TRIB1,PLA2G2A,PRAMEF10,PLXNB1,CD320,MYOCD,MEN1,COX17,SCRG1,BHLHB3,TGFB3,RXRA,APLNR,C9ORF47,RPS6KA2,TACC1,TNS3,RUNX2,RUNX1,SOX11,RAF1,SGK1,MAGED1,WNT7A,CDKN2A,KIF1A,VEGFA,TP53,ESR1,SRC,TRAF6,HDAC1,MYC,AR,EGFR,SMAD3,JUN,SMAD2,BRCA1,CSNK2A1,CTNNB1,MAPK1,FYN,MDM2,ABL1,AKT1,RB1,PRKCA,RELA,SP1,HDAC2,SMAD4,STAT3,M…
GO:BP	cellular biosynthetic process	GO:0044249	7.28E-36	35.13792599	6102	618	368	17847	RORC,SNRPF,LPIN2,TMEM14C,PSRC1,ENOPH1,NFE2,GMDS,SEPHS1,AIMP2,PRAMEF6,UBE2D3,HFE2,ANKRD1,COMP,NR1H2,CDC123,CSDA,DUX4,PHIP,FHL2,NIPBL,NBL1,SIRT2,PRKCD,NR4A1,BAG3,TRIB1,MRPL14,PSMC2,PLA2G2A,PRAMEF10,ZMYM6,MYOCD,TXN,ADIPOR2,MEN1,HFE,MRPS11,ACACA,RFC4,TOP2A,MRPS30,BHLHB3,ZNF93,ZNF135,TGFB3,RXRA,VCAN,SCD,AATF,TNNI2,GTF2E2,ASNS,IRF5,EPAS1,VEZF1,RPS26,TACC1,H2AFZ,PIP5K1C,DERA,RUNX2,FOS,RUNX1,SOX11,MRPL53…
GO:BP	regulation of protein phosphorylation	GO:0001932	1.24E-35	34.90757758	1477	618	157	17847	TMEM119,PSRC1,PTPN6,STK38,ATP6AP2,PHIP,SIRT2,PRKCD,TSLP,TRIB1,PLA2G2A,MYOCD,TXN,MEN1,HFE,TGFB3,APLNR,FGG,RAF1,MAGED1,WNT7A,CDKN2A,CTDSP2,UBA52,VEGFA,UBC,TP53,GRB2,SRC,TRAF6,MYC,AR,EGFR,JUN,IKBKG,YWHAG,CTNNB1,MAPK1,FYN,ABL1,AKT1,RB1,PRKCA,ACTB,HDAC2,SMAD4,STAT3,PRKACA,UBB,MAPK3,PTPN11,PRKDC,NCOR1,CBL,SHC1,RPS27A,HDAC3,PML,TGFBR1,PPP2CA,NPM1,CRK,PPP2R1A,TNFRSF1A,LYN,NCK1,MAPK14,JAK2,CDK1,DAXX,SYK,E…
GO:BP	regulation of multicellular organismal development	GO:2000026	1.44E-35	34.84060286	2180	618	196	17847	TMEM119,NFE2,PTPN6,ANKRD1,COMP,CSDA,MYH6,PMP22,NIPBL,NBL1,SIRT2,TRIB1,PSMC2,PLXNB1,MYOCD,TUBB2B,BHLHB3,TGFB3,RXRA,CLDN5,APLNR,C9ORF47,VEZF1,RUNX2,FOS,RUNX1,SOX11,MAGED1,WNT7A,MIR210,CDKN2A,PSMA5,MYOZ1,VEGFA,TP53,YWHAZ,ESR1,SRC,EP300,CREBBP,TRAF6,HDAC1,MYC,AR,EGFR,SMAD3,JUN,SMAD2,BRCA1,YWHAG,CTNNB1,MAPK1,PIK3R1,FYN,MDM2,ABL1,AKT1,RB1,PRKCA,RELA,SP1,HDAC2,SMAD4,STAT3,PRKACA,RARA,PLCG1,SIN3A,PML,TGF…
GO:BP	positive regulation of multicellular organismal process	GO:0051240	2.43E-35	34.61450802	1835	618	177	17847	TMEM119,ANKRD1,ATP6AP2,CSDA,MFAP2,NIPBL,NBL1,SIRT2,TSLP,TRIB1,IL17B,PLXNB1,MYOCD,TUBB2B,ADIPOR2,TGFB3,APLNR,SCD,IRF5,EPAS1,FGG,PANX3,RUNX2,FOS,RUNX1,SOX11,ATP2A1,MAGED1,WNT7A,SLN,MIR210,VEGFA,SRC,EP300,CREBBP,TRAF6,HDAC1,MYC,AR,EGFR,SMAD3,JUN,SMAD2,BRCA1,CTNNB1,MAPK1,PIK3R1,FYN,ABL1,AKT1,RB1,PRKCA,RELA,SP1,HDAC2,SMAD4,NFKB1,STAT3,RARA,MAPK3,PTPN11,PRKDC,PLCG1,SIN3A,HDAC3,PARP1,TGFBR1,STAT1,NCOA1,…
GO:BP	biosynthetic process	GO:0009058	2.71E-35	34.56667354	6295	618	374	17847	RORC,SNRPF,LPIN2,TMEM14C,PSRC1,ENOPH1,NFE2,GMDS,SEPHS1,AIMP2,PRAMEF6,GK5,UBE2D3,HFE2,ANKRD1,COMP,NR1H2,CDC123,CSDA,DUX4,PHIP,FHL2,NIPBL,NBL1,SIRT2,PRKCD,NR4A1,BAG3,TRIB1,MRPL14,PSMC2,PLA2G2A,PRAMEF10,ZMYM6,MYOCD,TXN,ADIPOR2,MEN1,HFE,MRPS11,ACACA,RFC4,GCAT,TOP2A,MRPS30,BHLHB3,ZNF93,ZNF135,TGFB3,RXRA,VCAN,SCD,AATF,TNNI2,GTF2E2,ASNS,IRF5,EPAS1,VEZF1,RPS26,TACC1,H2AFZ,PIP5K1C,DERA,RUNX2,FOS,RUNX1,SOX…
GO:BP	negative regulation of biosynthetic process	GO:0009890	8.97E-35	34.04705606	1674	618	167	17847	RORC,PRAMEF6,UBE2D3,HFE2,ANKRD1,NR1H2,CSDA,FHL2,NIPBL,SIRT2,BAG3,PRAMEF10,MYOCD,TXN,MEN1,BHLHB3,ZNF93,RXRA,AATF,RUNX2,RUNX1,SOX11,MAGED1,MIR210,CDKN2A,TPR,MYOZ1,UBA52,VEGFA,UBC,TP53,ESR1,SRC,EP300,CREBBP,TRAF6,HDAC1,MYC,AR,SMAD3,JUN,SMAD2,BRCA1,CTNNB1,FYN,MDM2,NR3C1,RB1,RELA,HDAC2,UBE2I,SMAD4,NFKB1,STAT3,UBB,RARA,PCNA,VHL,NCOR1,SHC1,YWHAQ,YWHAB,SIN3A,RPS27A,HDAC3,PARP1,PML,SMARCA4,HSPA8,NCOR2,STA…
GO:BP	protein metabolic process	GO:0019538	1.12E-34	33.9493964	5905	618	358	17847	RNF220,CLTA,TMEM119,SERPINA6,PSRC1,SEPHS1,AIMP2,UBE2D3,COL2A1,HFE2,PTPN6,STK38,ATP6AP2,COMP,NR1H2,CDC123,PPIAL4G,CSDA,MYH6,MEPE,PHIP,RAB8A,NIPBL,SIRT2,PAMR1,PRKCD,TSLP,AMZ2,NR4A1,BAG3,TRIB1,MRPL14,PSMC2,PLA2G2A,MYOCD,TXN,MEN1,DCAF7,HFE,MRPS11,ACACA,MRPS30,TGFB3,RXRA,VCAN,KLK4,UCHL3,NEK6,APLNR,RPS6KA2,RAB1B,AATF,EPAS1,RPS26,TMUB1,FGG,MRPL53,RAF1,PRSS21,SGK1,MAGED1,UBA1,CLN5,WNT7A,MIR210,FBXL20,CDK…
GO:BP	cellular component assembly	GO:0022607	1.16E-34	33.93559381	3017	618	236	17847	SNRPF,PARVG,CLNS1A,CLTA,SAMM50,PSRC1,LRRC8A,AIMP2,ANKRD1,CDC123,RUFY4,CEP250,NPHP1,MYH6,PMP22,RAB8A,PPFIA1,SIRT2,PRKCD,FOXRED1,BAG3,RYR1,TCAP,ESPN,PSMC2,MYL2,PLXNB1,MYOM1,CKAP5,CENPN,TNNT3,MEN1,HFE,MRPS11,COX17,ACACA,TGFB3,MYH11,NEK6,CLDN5,FOLR1,RAB1B,FGG,PIP5K1C,PANX3,RUNX1,RAF1,WNT7A,ACTA1,DHX30,CDKN2A,SYNPO2L,TSPY2,TPR,MYOZ1,KLHL21,FGD5,UBA52,VEGFA,UBC,TP53,YWHAZ,ESR1,GRB2,SRC,EP300,CREBBP,HDA…
GO:BP	positive regulation of programmed cell death	GO:0043068	1.45E-34	33.83770982	697	618	104	17847	ANKRD1,SIRT2,PRKCD,NR4A1,TIAM2,TOP2A,TGFB3,RPS6KA2,IRF5,MAGED1,MIR210,CDKN2A,UBA52,UBC,TP53,YWHAZ,SRC,TRAF6,MYC,SMAD3,JUN,YWHAG,CTNNB1,ABL1,AKT1,UBB,PRKDC,PLCG1,LCK,YWHAQ,YWHAB,RPS27A,PML,TGFBR1,YWHAE,NCOA1,PPP2R1A,GSK3B,PPARG,TNFRSF1A,LYN,NCK1,HDAC4,JAK2,SYK,PIN1,CDKN1A,SIRT1,VDR,SFN,RNPS1,TERF1,ATM,MAPK8,CASP8,CDC42,APC,ZBTB16,VAV1,CREB1,CAV1,E2F1,YWHAH,CDK4,BCL2,PPP1CA,ARRB1,ARRB2,SQSTM1,TNFRS…
GO:BP	cellular component biogenesis	GO:0044085	3.97E-34	33.40136805	3253	618	246	17847	SNRPF,PARVG,CLNS1A,CLTA,SAMM50,PSRC1,LRRC8A,AIMP2,ANKRD1,CDC123,RUFY4,CEP250,NPHP1,MYH6,PMP22,RAB8A,EXOSC1,PPFIA1,SIRT2,PRKCD,FOXRED1,BAG3,RYR1,TCAP,ESPN,PSMC2,MYL2,PLXNB1,MYOM1,CKAP5,CENPN,TNNT3,MEN1,HFE,RPUSD1,MRPS11,COX17,ACACA,POP5,TGFB3,MYH11,NEK6,CLDN5,FOLR1,RAB1B,AATF,FGG,PIP5K1C,PANX3,RUNX1,RAF1,WNT7A,ACTA1,DDX18,DHX30,CDKN2A,SYNPO2L,TSPY2,TPR,MYOZ1,KLHL21,FGD5,UBA52,VEGFA,UBC,TP53,YWHAZ,…
GO:BP	negative regulation of cellular biosynthetic process	GO:0031327	7.03E-34	33.15276356	1648	618	164	17847	RORC,PRAMEF6,UBE2D3,HFE2,ANKRD1,NR1H2,CSDA,FHL2,NIPBL,SIRT2,BAG3,PRAMEF10,MYOCD,TXN,MEN1,BHLHB3,ZNF93,RXRA,AATF,RUNX2,RUNX1,SOX11,MAGED1,MIR210,CDKN2A,TPR,MYOZ1,UBA52,VEGFA,UBC,TP53,ESR1,SRC,EP300,CREBBP,TRAF6,HDAC1,MYC,AR,SMAD3,JUN,SMAD2,BRCA1,CTNNB1,FYN,MDM2,NR3C1,RB1,RELA,HDAC2,UBE2I,SMAD4,NFKB1,STAT3,UBB,RARA,PCNA,VHL,NCOR1,SHC1,YWHAQ,YWHAB,SIN3A,RPS27A,HDAC3,PARP1,PML,SMARCA4,HSPA8,NCOR2,STA…
GO:BP	negative regulation of transcription by RNA polymerase II	GO:0000122	8.14E-34	33.08945261	863	618	115	17847	RORC,UBE2D3,HFE2,ANKRD1,NR1H2,CSDA,FHL2,NIPBL,SIRT2,BAG3,MYOCD,TXN,MEN1,BHLHB3,RXRA,RUNX1,SOX11,TPR,MYOZ1,UBA52,VEGFA,UBC,TP53,ESR1,EP300,CREBBP,TRAF6,HDAC1,MYC,AR,SMAD3,JUN,SMAD2,CTNNB1,MDM2,NR3C1,RB1,RELA,HDAC2,UBE2I,SMAD4,NFKB1,STAT3,UBB,RARA,PCNA,VHL,NCOR1,SIN3A,RPS27A,HDAC3,PARP1,SMARCA4,NCOR2,STAT1,PPARG,CEBPB,SUMO1,NCK1,HDAC4,PLK1,SIRT1,VDR,RIF1,HTATIP,ESR2,THRB,TRIM28,RBBP7,NFKB2,ZBTB16,S…
GO:BP	positive regulation of apoptotic process	GO:0043065	1.64E-33	32.78400498	689	618	102	17847	ANKRD1,SIRT2,PRKCD,NR4A1,TIAM2,TOP2A,TGFB3,RPS6KA2,IRF5,MAGED1,MIR210,CDKN2A,UBA52,UBC,TP53,YWHAZ,SRC,TRAF6,MYC,SMAD3,JUN,YWHAG,CTNNB1,ABL1,AKT1,UBB,PRKDC,PLCG1,LCK,YWHAQ,YWHAB,RPS27A,PML,TGFBR1,YWHAE,NCOA1,PPP2R1A,GSK3B,PPARG,TNFRSF1A,LYN,NCK1,HDAC4,JAK2,SYK,PIN1,SIRT1,VDR,SFN,RNPS1,TERF1,ATM,MAPK8,CASP8,CDC42,APC,ZBTB16,VAV1,CREB1,CAV1,E2F1,YWHAH,CDK4,BCL2,PPP1CA,ARRB1,ARRB2,SQSTM1,TNFRSF1B,PAK…
GO:BP	response to lipid	GO:0033993	2.21E-33	32.65512918	945	618	120	17847	RORC,ANKRD1,NR1H2,FHL2,NR4A1,TRIB1,ACACA,TGFB3,RXRA,SCD,H2AFZ,FOS,RUNX1,WNT7A,ACTA1,DDX18,ESR1,SRC,EP300,TRAF6,HDAC1,AR,EGFR,JUN,SMAD2,BRCA1,CTNNB1,MAPK1,MDM2,ABL1,AKT1,NR3C1,RB1,PRKCA,RELA,HDAC2,NFKB1,STAT3,RARA,PCNA,MAPK3,NCOR1,CBL,PARP1,SMARCA4,TGFBR1,NCOR2,NFKBIA,NCOA1,NCOA3,RUVBL2,PPARG,CEBPB,LYN,VIM,MAPK14,JAK2,DAXX,CDKN1A,SIRT1,XRCC5,VDR,IRS1,CHUK,HTATIP,ESR2,ATM,MAPK8,CASP8,THRB,RBBP7,PAK…
GO:BP	phosphate-containing compound metabolic process	GO:0006796	2.21E-33	32.65508529	3351	618	249	17847	LPIN2,TMEM119,PSRC1,ENOPH1,SEPHS1,GK5,PTPN6,STK38,ATP6AP2,MYH6,PFKFB4,PHIP,SIRT2,PRKCD,TSLP,TRIB1,PSMC2,PLA2G2A,MYOCD,TXN,MEN1,HFE,ACACA,TGFB3,NEK6,APLNR,SCD,RPS6KA2,EFR3A,FGG,PIP5K1C,DERA,RAF1,SGK1,MAGED1,WNT7A,MIR210,CDKN2A,CKM,RAE1,CDK2AP2,TPR,PSMA5,AMPD1,MYOZ1,CTDSP2,UBA52,VEGFA,UBC,TP53,YWHAZ,GRB2,SRC,TRAF6,MYC,AR,EGFR,SMAD3,JUN,SMAD2,IKBKG,CSNK2A1,YWHAG,CTNNB1,MAPK1,IKBKE,PIK3R1,FYN,ABL1,AK…
GO:BP	phosphorus metabolic process	GO:0006793	2.74E-33	32.56256467	3377	618	250	17847	LPIN2,TMEM119,PSRC1,ENOPH1,GMDS,SEPHS1,GK5,PTPN6,STK38,ATP6AP2,MYH6,PFKFB4,PHIP,SIRT2,PRKCD,TSLP,TRIB1,PSMC2,PLA2G2A,MYOCD,TXN,MEN1,HFE,ACACA,TGFB3,NEK6,APLNR,SCD,RPS6KA2,EFR3A,FGG,PIP5K1C,DERA,RAF1,SGK1,MAGED1,WNT7A,MIR210,CDKN2A,CKM,RAE1,CDK2AP2,TPR,PSMA5,AMPD1,MYOZ1,CTDSP2,UBA52,VEGFA,UBC,TP53,YWHAZ,GRB2,SRC,TRAF6,MYC,AR,EGFR,SMAD3,JUN,SMAD2,IKBKG,CSNK2A1,YWHAG,CTNNB1,MAPK1,IKBKE,PIK3R1,FYN,AB…
GO:BP	cellular response to organic cyclic compound	GO:0071407	4.51E-33	32.34591927	618	618	96	17847	RORC,ANKRD1,NR1H2,FHL2,SIRT2,NR4A1,RYR1,RXRA,FOLR1,H2AFZ,RUNX1,DDX18,RAE1,ESR1,SRC,EP300,HDAC1,AR,EGFR,BRCA1,CTNNB1,MAPK1,MDM2,ABL1,AKT1,NR3C1,RB1,ACTB,HDAC2,NFKB1,STAT3,PRKACA,RARA,MAPK3,NCOR1,SIN3A,PARP1,SMARCA4,NCOR2,NPM1,STAT1,NCOA1,NCOA3,RUVBL2,GSK3B,PPARG,CEBPB,JAK2,FLNA,DAXX,SIRT1,VDR,APP,DHX9,HTATIP,ESR2,CASP8,THRB,PAK1,CAV1,THRA,HSPA5,MYOD1,YWHAH,CDK4,CDH1,CEBPA,ARRB2,NEDD4,MGMT,PARK2,PA…
GO:BP	macromolecule metabolic process	GO:0043170	7.30E-33	32.13682185	9523	618	478	17847	RNF220,RORC,SNRPF,CLNS1A,LPIN2,CLTA,TMEM119,SERPINA6,PSRC1,NFE2,SEPHS1,AIMP2,PRAMEF6,UBE2D3,COL2A1,HFE2,PTPN6,STK38,ANKRD1,ATP6AP2,COMP,NR1H2,CDC123,PPIAL4G,CSDA,MYH6,DUX4,MEPE,PHIP,RAB8A,FHL2,NIPBL,EXOSC1,NBL1,SIRT2,PAMR1,PRKCD,TSLP,AMZ2,NR4A1,BAG3,SNRPN,TRIB1,MRPL14,PSMC2,PLA2G2A,PRAMEF10,ZMYM6,MYOCD,TXN,MYOM1,MIR99A,MEN1,DCAF7,HFE,RPUSD1,MRPS11,ACACA,RFC4,TOP2A,MRPS30,BHLHB3,ZNF93,ZNF135,POP5,…
GO:BP	signal transduction by protein phosphorylation	GO:0023014	8.70E-33	32.06042822	973	618	121	17847	PTPN6,STK38,ATP6AP2,PRKCD,TRIB1,PSMC2,PLA2G2A,MEN1,TGFB3,FGG,RAF1,MAGED1,WNT7A,PSMA5,UBA52,VEGFA,UBC,GRB2,SRC,TRAF6,MYC,AR,EGFR,JUN,IKBKG,CTNNB1,MAPK1,FYN,ABL1,AKT1,PRKCA,SMAD4,NFKB1,UBB,MAPK3,PTPN11,NCOR1,SHC1,YWHAB,RPS27A,HDAC3,TGFBR1,PPP2CA,YWHAE,CRK,PPP2R1A,LYN,IKBKB,MAPK14,JAK2,CDK1,DAXX,SYK,ERBB2,PIN1,PRKCZ,MAP3K14,APP,IRS1,CHUK,MAPK8,CDC42,PAK1,HGS,PSMC5,CAV1,COPS5,JAK1,ARRB1,FN1,ARRB2,INS…
GO:BP	cellular response to DNA damage stimulus	GO:0006974	1.83E-32	31.73858078	862	618	113	17847	UBE2D3,ANKRD1,NIPBL,PRKCD,MEN1,MRPS11,RFC4,TOP2A,CHRNA4,AATF,SGK1,UBA1,UBA52,NSMCE2,UBC,TP53,GRB2,EP300,TRAF6,MYC,EGFR,BRCA1,IKBKG,MAPK1,IKBKE,PIK3R1,MDM2,ABL1,AKT1,UBB,PCNA,MAPK3,PTPN11,PRKDC,CBL,RPS27A,PARP1,PML,H2AFX,NPM1,RUVBL2,MCM7,SUMO1,TNFRSF1A,LYN,POLR2A,MAPK14,CDK1,CDKN1A,PLK1,SIRT1,NCOA6,XRCC5,MCM3,RIF1,DHX9,STUB1,HTATIP,SFN,CDK9,ATM,TRIM28,PAK1,APC,TERF2,E2F1,COPS5,BCL2,MCM2,FANCA,NEDD…
GO:BP	regulation of transferase activity	GO:0051338	1.98E-32	31.70405436	981	618	121	17847	PSRC1,PTPN6,STK38,PRKCD,TRIB1,MYOCD,TXN,MEN1,RFC4,TGFB3,RAF1,MAGED1,CDKN2A,UBA52,VEGFA,UBC,TP53,SRC,TRAF6,MYC,EGFR,IKBKG,YWHAG,CTNNB1,MAPK1,PIK3R1,FYN,ABL1,AKT1,RB1,ACTB,UBE2I,PRKACA,UBB,MAPK3,PTPN11,CBL,SHC1,RPS27A,TGFBR1,PPP2CA,NPM1,CRK,PPP2R1A,GSK3B,PPARG,EEF1A1,LYN,NCK1,MAPK14,JAK2,CDK1,DAXX,SYK,ERBB2,PIN1,CDKN1A,PRKCZ,PLK1,SIRT1,XRCC5,MAP3K14,APP,IRS1,STUB1,SFN,TERF1,CDC42,PAK1,APC,HGS,CAV1,…
GO:BP	negative regulation of response to stimulus	GO:0048585	2.08E-32	31.68194815	1711	618	165	17847	COL2A1,HFE2,PTPN6,STK38,NR1H2,CSDA,SIGLEC10,PHIP,FHL2,NBL1,SIRT2,PRKCD,TRIB1,PSMC2,MYOCD,TXN,MIR99A,MEN1,HFE,TGFB3,APLNR,AATF,FGG,RUNX2,RAF1,MIR210,PSMA5,MYOZ1,UBA52,UBC,TP53,ESR1,GRB2,SRC,HDAC1,MYC,AR,EGFR,SMAD3,SMAD2,BRCA1,CSNK2A1,CTNNB1,FYN,MDM2,ABL1,AKT1,RB1,RELA,SMAD4,NFKB1,MCC,PRKACA,UBB,VHL,PTPN11,PRKDC,NCOR1,CBL,YWHAB,RPS27A,HDAC3,SMARCA4,TGFBR1,PPP2CA,NCOR2,STAT1,NFKBIA,CRK,RUVBL2,PPP2R1…
GO:BP	positive regulation of developmental process	GO:0051094	2.16E-32	31.66533448	1432	618	149	17847	TMEM119,ANKRD1,CSDA,NIPBL,NBL1,SIRT2,TRIB1,BOC,PLA2G2A,PLXNB1,MYOCD,TUBB2B,TGFB3,CLDN5,APLNR,VEZF1,FGG,RUNX2,FOS,RUNX1,SOX11,MAGED1,WNT7A,MIR210,CDKN2A,VEGFA,TP53,SRC,EP300,TRAF6,HDAC1,MYC,AR,SMAD3,JUN,SMAD2,BRCA1,CTNNB1,MAPK1,FYN,ABL1,AKT1,RB1,PRKCA,RELA,SP1,HDAC2,SMAD4,NFKB1,STAT3,RARA,VHL,PRKDC,PLCG1,SIN3A,PARP1,TGFBR1,STAT1,CRK,NCOA1,NCOA3,PPARG,CEBPB,SMAD1,TNFRSF1A,LYN,NCK1,MAPK14,JAK2,FLNA,…
GO:BP	MAPK cascade	GO:0000165	3.00E-32	31.52259192	955	618	119	17847	PTPN6,STK38,ATP6AP2,PRKCD,TRIB1,PSMC2,PLA2G2A,MEN1,TGFB3,FGG,RAF1,MAGED1,WNT7A,PSMA5,UBA52,VEGFA,UBC,GRB2,SRC,TRAF6,MYC,AR,EGFR,JUN,IKBKG,CTNNB1,MAPK1,FYN,ABL1,AKT1,PRKCA,SMAD4,NFKB1,UBB,MAPK3,PTPN11,NCOR1,SHC1,YWHAB,RPS27A,HDAC3,TGFBR1,PPP2CA,YWHAE,CRK,PPP2R1A,LYN,IKBKB,MAPK14,JAK2,CDK1,DAXX,SYK,ERBB2,PIN1,PRKCZ,MAP3K14,APP,IRS1,CHUK,MAPK8,CDC42,PAK1,HGS,PSMC5,CAV1,COPS5,JAK1,ARRB1,FN1,ARRB2,INS…
GO:BP	regulation of cellular catabolic process	GO:0031329	3.12E-32	31.50543566	838	618	111	17847	TPCN1,RUFY4,CSDA,PFKFB4,ATP6V1B2,RAB8A,EXOSC1,SIRT2,PRKCD,BAG3,TRIB1,PSMC2,HFE,RAB1B,CDKN2A,PSMA5,UBA52,UBC,TP53,YWHAZ,EP300,IKBKG,CSNK2A1,MDM2,ABL1,AKT1,PRKCA,STAT3,PRKACA,UBB,MAPK3,YWHAB,RPS27A,PML,HSPA8,NPM1,GSK3B,EEF1A1,SUMO1,VIM,SUMO2,MAPK14,HIF1A,PLK1,SIRT1,PRKAB1,CSNK2A2,APP,IRS1,DHX9,STUB1,HTATIP,SMURF1,ATM,MAPK8,PSMC5,CAV1,HSP90AA1,E2F1,HSPA1A,BCL2,PPP1CA,XPO1,CEBPA,CDC37,SET,NEDD4,TNFRS…
GO:BP	regulation of binding	GO:0051098	4.28E-32	31.36867657	382	618	75	17847	NIPBL,SIRT2,PRKCD,MYOCD,TXN,MEN1,HFE,CLDN5,SOX11,CLN5,SLN,SRC,EP300,TRAF6,SMAD3,JUN,SMAD2,CTNNB1,ABL1,AKT1,RB1,ACTB,HDAC2,SMAD4,PRKACA,RARA,MAPK3,SIN3A,PARP1,TGFBR1,PPP2CA,NFKBIA,CRK,RUVBL2,GSK3B,PPARG,SUMO1,HDAC4,JAK2,PIN1,EPB41,PLK1,APP,DHX9,STUB1,CDK9,MAPK8,TRIM28,CDC42,ARF6,CAV1,E2F1,HSPA5,HDAC5,BCL2,PPP1CA,ARRB1,ARRB2,PARK2,DISC1,PPP2CB,GTF2B,MAP2K1,ANXA2,BCL3,HMGB1,GTF2F1,MAPRE1,PPARA,PSEN1…
GO:BP	apoptotic signaling pathway	GO:0097190	4.53E-32	31.34369336	609	618	94	17847	COL2A1,CSDA,PHIP,PRKCD,BAG3,AATF,FGG,ATP2A1,RAF1,MAGED1,MIR210,TP53,YWHAZ,SRC,EP300,HDAC1,AR,SMAD3,JUN,BRCA1,CSNK2A1,YWHAG,CTNNB1,IKBKE,PIK3R1,FYN,MDM2,ABL1,AKT1,RB1,PRKCA,RELA,UBB,PRKDC,LCK,YWHAQ,YWHAB,PARP1,PML,TGFBR1,YWHAE,PPP2R1A,GSK3B,CEBPB,TNFRSF1A,NCK1,JAK2,DAXX,CDKN1A,HIF1A,SIRT1,CSNK2A2,SFN,ATM,MAPK8,CASP8,CAV1,E2F1,HSPA1A,YWHAH,BCL2,PPP1CA,ARRB2,MLH1,TNFRSF1B,PARK2,PAK2,KRT18,MAP3K5,SKI…
GO:BP	negative regulation of signal transduction	GO:0009968	6.19E-32	31.20830239	1327	618	142	17847	COL2A1,HFE2,PTPN6,STK38,NR1H2,CSDA,PHIP,FHL2,NBL1,PRKCD,TRIB1,PSMC2,MYOCD,MIR99A,MEN1,TGFB3,APLNR,AATF,FGG,RUNX2,RAF1,MIR210,PSMA5,MYOZ1,UBA52,UBC,TP53,ESR1,GRB2,SRC,HDAC1,MYC,AR,EGFR,SMAD3,SMAD2,BRCA1,CSNK2A1,CTNNB1,FYN,MDM2,ABL1,AKT1,RB1,RELA,SMAD4,MCC,PRKACA,UBB,VHL,NCOR1,CBL,YWHAB,RPS27A,HDAC3,SMARCA4,TGFBR1,PPP2CA,NCOR2,STAT1,NFKBIA,RUVBL2,PPP2R1A,GSK3B,PPARG,LYN,NCK1,MAPK14,ERBB2,PIN1,HIF1A…
GO:BP	regulation of catalytic activity	GO:0050790	1.01E-31	30.99763844	2338	618	197	17847	SERPINA6,PSRC1,AIMP2,PTPN6,STK38,NR1H2,MYH6,PRKCD,NR4A1,BAG3,TRIB1,PLXNB1,GRM3,MYOCD,TXN,TNNT3,MEN1,TIAM2,COX17,RFC4,TGFB3,CAP1,RAF1,SGK1,MAGED1,SLN,MIR210,CDKN2A,MYOZ1,FGD5,UBA52,VEGFA,UBC,TP53,ESR1,SRC,TRAF6,HDAC1,MYC,EGFR,SMAD3,JUN,IKBKG,CSNK2A1,YWHAG,CTNNB1,MAPK1,PIK3R1,FYN,MDM2,ABL1,AKT1,RB1,ACTB,UBE2I,NFKB1,STAT3,PRKACA,UBB,PCNA,MAPK3,PTPN11,PLCG1,LCK,CBL,SHC1,YWHAB,RPS27A,PARP1,PML,TGFBR1,…
GO:BP	response to oxygen levels	GO:0070482	1.07E-31	30.96870617	398	618	76	17847	ANKRD1,SIRT2,RYR1,PSMC2,MYOCD,TGFB3,CHRNA4,EPAS1,MB,RAF1,MIR210,PSMA5,ALAS2,UBA52,VEGFA,UBC,TP53,SRC,EP300,CREBBP,MYC,SMAD3,MDM2,AKT1,HDAC2,SMAD4,UBB,VHL,CBL,RPS27A,PML,PPARG,POLR2A,PIN1,CDKN1A,HIF1A,SIRT1,STUB1,ATM,PAK1,PSMC5,CREB1,CAV1,E2F1,MYOD1,CDK4,BCL2,ETS1,PTK2B,PSMA1,PSMD4,PRKCE,SRF,NDRG1,MYB,PSMD2,NOTCH1,PDGFRB,PHB2,PSMA3,PSMC1,SUV39H1,ATF4,PPARA,PSMD13,PPARGC1A,RHOA,TGFBR2,MDM4,PSMC6,PS…
GO:BP	positive regulation of protein modification process	GO:0031401	3.76E-31	30.42518908	1249	618	136	17847	TMEM119,PSRC1,AIMP2,NIPBL,PRKCD,TSLP,PLA2G2A,TXN,HFE,TGFB3,APLNR,FGG,RAF1,MAGED1,WNT7A,CDKN2A,UBA52,VEGFA,UBC,TP53,SRC,TRAF6,AR,EGFR,JUN,BRCA1,IKBKG,CTNNB1,MAPK1,FYN,ABL1,AKT1,PRKCA,HDAC2,UBE2I,SMAD4,STAT3,PRKACA,UBB,MAPK3,PTPN11,SHC1,RPS27A,HDAC3,TGFBR1,PPP2CA,CRK,RUVBL2,TNFRSF1A,LYN,HDAC4,MAPK14,JAK2,CDK1,DAXX,SYK,ERBB2,PIN1,CDKN1A,PRKCZ,PLK1,SIRT1,XRCC5,MAP3K14,APP,RIF1,STUB1,HTATIP,CDK9,ATM,C…
GO:BP	intracellular receptor signaling pathway	GO:0030522	4.61E-31	30.33636317	280	618	64	17847	RORC,NR1H2,FHL2,NR4A1,RXRA,RUNX1,UBA52,UBC,ESR1,SRC,EP300,TRAF6,HDAC1,AR,BRCA1,IKBKG,CTNNB1,NR3C1,RB1,RELA,STAT3,UBB,RARA,NCOR1,RPS27A,PARP1,PML,SMARCA4,NCOR2,NFKBIA,NCOA1,NCOA3,PPARG,JAK2,DAXX,SIRT1,VDR,HTATIP,ESR2,CASP8,THRB,PAK1,THRA,HSPA1A,YWHAH,ARRB2,NEDD4,NRIP1,HDAC6,PHB2,STRN3,ITCH,MAP3K7,RXRB,PPARA,PHB,PPARGC1A,CARM1,RHOA,AXIN1,DDX17,DAB2,CDK7,NR1H3
GO:BP	chromosome organization	GO:0051276	5.98E-31	30.22301477	1238	618	135	17847	ACTR6,PSRC1,NFE2,NIPBL,SIRT2,PRKCD,MYOCD,CENPN,MEN1,RFC4,TOP2A,NEK6,H2AFZ,CDKN2A,RAE1,TSPY2,TPR,UBA52,NSMCE2,VEGFA,UBC,TP53,ESR1,SRC,EP300,CREBBP,HDAC1,MYC,BRCA1,CTNNB1,MAPK1,ABL1,NR3C1,RB1,PRKCA,ACTB,RELA,HDAC2,SMAD4,UBB,PCNA,MAPK3,PRKDC,NCOR1,SIN3A,RPS27A,HDAC3,PARP1,PML,SMARCA4,H2AFX,NPM1,NCOA1,NCOA3,RUVBL2,PPP2R1A,MCM7,HDAC4,JAK2,CDK1,DAXX,PLK1,SIRT1,XRCC5,RBBP4,MCM3,RIF1,DHX9,HTATIP,TERF1,CD…
GO:BP	cytokine-mediated signaling pathway	GO:0019221	9.69E-31	30.01351739	797	618	106	17847	RORC,PTPN6,NR1H2,PRKCD,TSLP,PSMC2,IL13RA1,ADIPOR2,MIR99A,MT2A,IRF5,FOS,RUNX1,PSMA5,UBA52,VEGFA,UBC,TP53,YWHAZ,GRB2,TRAF6,MYC,IKBKG,IKBKE,PIK3R1,FYN,AKT1,RELA,SMAD4,NFKB1,STAT3,PRKACA,UBB,MAPK3,PTPN11,CBL,SHC1,RPS27A,PML,SMARCA4,HSPA8,STAT1,NFKBIA,CRK,PPARG,SUMO1,TNFRSF1A,IKBKB,VIM,JAK2,SYK,CDKN1A,HIF1A,SIRT1,MAP3K14,IRS1,CHUK,CASP8,CDC42,PSMC5,VAV1,CAV1,HSP90AA1,HSPA1A,BCL2,JAK1,CEBPA,FN1,CDC37,C…
GO:BP	positive regulation of intracellular signal transduction	GO:1902533	1.09E-30	29.96060992	1037	618	122	17847	PTPN6,ANKRD1,PLA2G2A,PLXNB1,TXN,S100A4,TGFB3,NEK6,FGG,SOX11,RAF1,MAGED1,WNT7A,SYNPO2L,UBA52,VEGFA,UBC,TP53,ESR1,GRB2,SRC,EP300,TRAF6,AR,EGFR,JUN,IKBKG,CTNNB1,MAPK1,IKBKE,PIK3R1,FYN,ABL1,AKT1,PRKCA,RELA,UBE2I,UBB,MAPK3,PTPN11,LCK,CBL,SHC1,RPS27A,HDAC3,TGFBR1,CRK,TNFRSF1A,LYN,IKBKB,NCK1,MAPK14,JAK2,FLNA,CDK1,DAXX,SYK,ERBB2,PRKCZ,SIRT1,MAP3K14,APP,IRS1,CHUK,ATM,CASP8,CDC42,PAK1,VAV1,CAV1,HSP90AA1,HS…
GO:BP	hematopoietic or lymphoid organ development	GO:0048534	1.20E-30	29.92010261	946	618	116	17847	RORC,TMEM14C,LRRC8A,NFE2,MT1G,PTPN6,TRIB1,PSMC2,TOP2A,EPAS1,MB,RUNX2,FOS,RUNX1,RAF1,CDKN2A,PSMA5,ALAS2,VEGFA,TP53,SRC,EP300,CREBBP,TRAF6,HDAC1,MYC,JUN,CTNNB1,MAPK1,PIK3R1,ABL1,RB1,PRKCA,STAT3,RARA,MAPK3,PTPN11,PRKDC,LCK,SIN3A,PARP1,PML,TGFBR1,STAT1,NFKBIA,PPARG,CEBPB,LYN,HDAC4,MAPK14,JAK2,SYK,ERBB2,HIF1A,PRKCZ,SIRT1,NCOA6,XRCC5,APP,ATM,CASP8,CDC42,NFKB2,ZBTB16,PSMC5,VAV1,CREB1,THRA,HDAC5,HSPA1A,B…
GO:BP	cell cycle process	GO:0022402	1.21E-30	29.91557923	1397	618	144	17847	ACTR1B,PSRC1,PTPN6,CDC123,CEP250,DUX4,PHIP,NIPBL,SIRT2,PSMC2,CKAP5,MEN1,RFC4,TOP2A,NEK6,RPS6KA2,TACC1,CDKN2A,RAE1,CDK2AP2,TPR,PSMA5,CTDSP2,KLHL21,NSMCE2,TP53,EP300,MYC,EGFR,SMAD3,BRCA1,CSNK2A1,YWHAG,CTNNB1,MDM2,ABL1,AKT1,RB1,PRKCA,PRKACA,UBB,PCNA,PRKDC,NCOR1,SIN3A,HDAC3,PML,TGFBR1,PPP2CA,YWHAE,NPM1,PPP2R1A,MCM7,TUBB,FLNA,CDK1,PIN1,CDKN1A,PLK1,PRKAB1,RBBP4,CSNK2A2,APP,MCM3,SFN,TERF1,CDK9,ATM,CDC42…
GO:BP	negative regulation of cell communication	GO:0010648	1.64E-30	29.7859124	1435	618	146	17847	COL2A1,HFE2,PTPN6,STK38,NR1H2,CSDA,PHIP,FHL2,NBL1,PRKCD,TRIB1,PSMC2,MYOCD,MIR99A,MEN1,TGFB3,APLNR,AATF,FGG,RUNX2,RAF1,MIR210,PSMA5,MYOZ1,UBA52,UBC,TP53,ESR1,GRB2,SRC,HDAC1,MYC,AR,EGFR,SMAD3,SMAD2,BRCA1,CSNK2A1,CTNNB1,FYN,MDM2,ABL1,AKT1,RB1,RELA,SMAD4,MCC,PRKACA,UBB,VHL,PTPN11,NCOR1,CBL,YWHAB,RPS27A,HDAC3,SMARCA4,TGFBR1,PPP2CA,NCOR2,STAT1,NFKBIA,RUVBL2,PPP2R1A,GSK3B,PPARG,LYN,NCK1,MAPK14,ERBB2,PIN…
GO:BP	immune system development	GO:0002520	2.03E-30	29.69321569	997	618	119	17847	RORC,TMEM14C,LRRC8A,NFE2,MT1G,PTPN6,TRIB1,PSMC2,TOP2A,EPAS1,MB,RUNX2,FOS,RUNX1,RAF1,CDKN2A,PSMA5,ALAS2,VEGFA,TP53,SRC,EP300,CREBBP,TRAF6,HDAC1,MYC,SMAD3,JUN,CTNNB1,MAPK1,PIK3R1,ABL1,RB1,PRKCA,STAT3,RARA,MAPK3,PTPN11,PRKDC,LCK,SIN3A,PARP1,PML,TGFBR1,STAT1,NFKBIA,PPARG,CEBPB,LYN,HDAC4,MAPK14,JAK2,SYK,ERBB2,HIF1A,PRKCZ,SIRT1,NCOA6,XRCC5,APP,RIF1,ATM,CASP8,CDC42,NFKB2,ZBTB16,PSMC5,VAV1,CREB1,THRA,HDA…
GO:BP	negative regulation of signaling	GO:0023057	2.24E-30	29.65004919	1439	618	146	17847	COL2A1,HFE2,PTPN6,STK38,NR1H2,CSDA,PHIP,FHL2,NBL1,PRKCD,TRIB1,PSMC2,MYOCD,MIR99A,MEN1,TGFB3,APLNR,AATF,FGG,RUNX2,RAF1,MIR210,PSMA5,MYOZ1,UBA52,UBC,TP53,ESR1,GRB2,SRC,HDAC1,MYC,AR,EGFR,SMAD3,SMAD2,BRCA1,CSNK2A1,CTNNB1,FYN,MDM2,ABL1,AKT1,RB1,RELA,SMAD4,MCC,PRKACA,UBB,VHL,PTPN11,NCOR1,CBL,YWHAB,RPS27A,HDAC3,SMARCA4,TGFBR1,PPP2CA,NCOR2,STAT1,NFKBIA,RUVBL2,PPP2R1A,GSK3B,PPARG,LYN,NCK1,MAPK14,ERBB2,PIN…
GO:BP	response to external stimulus	GO:0009605	2.82E-30	29.54988524	2887	618	221	17847	CMTM8,UBE2D3,PTPN6,ANKRD1,NR1H2,CEP250,EFNB1,SIGLEC10,NBL1,SIRT2,PRKCD,TSLP,NR4A1,BAG3,TRIB1,BOC,TCAP,IL17B,PSMC2,PLA2G2A,PLXNB1,MYOCD,TUBB2B,ADIPOR2,HFE,IFI44L,MT2A,SAA2,FOLR1,FLNB,ASNS,IRF5,FGG,PIP5K1C,FOS,RAF1,ACTA1,PSMA5,MYOZ1,DAD1,UBA52,VEGFA,UBC,TP53,ESR1,GRB2,SRC,EP300,CREBBP,TRAF6,EGFR,SMAD3,JUN,IKBKG,MAPK1,IKBKE,PIK3R1,FYN,MDM2,ABL1,AKT1,UBE2D2,RB1,PRKCA,RELA,HDAC2,SMAD4,NFKB1,PRKACA,UBB…
GO:BP	regulation of immune system process	GO:0002682	1.01E-29	28.99607391	1671	618	158	17847	NFE2,UBE2D3,COL2A1,PTPN6,NR1H2,EFNB1,NBL1,PRKCD,TSLP,TRIB1,PSMC2,PLA2G2A,CD320,CD8B,HFE,TGFB3,KIR2DL3,FGG,FOS,RUNX1,SOX11,RAF1,CDKN2A,PSMA5,UBA52,VEGFA,UBC,ESR1,GRB2,SRC,EP300,CREBBP,TRAF6,HDAC1,MYC,SMAD3,JUN,IKBKG,CTNNB1,MAPK1,IKBKE,PIK3R1,FYN,ABL1,AKT1,UBE2D2,RB1,PRKCA,ACTB,RELA,NFKB1,STAT3,PRKACA,UBB,RARA,MAPK3,PTPN11,PRKDC,PLCG1,LCK,SHC1,SIN3A,RPS27A,STAT1,NFKBIA,CRK,PPARG,CEBPB,SUMO1,LYN,IKB…
GO:BP	regulation of kinase activity	GO:0043549	1.02E-29	28.99293096	877	618	110	17847	PSRC1,PTPN6,STK38,PRKCD,TRIB1,MYOCD,TXN,MEN1,TGFB3,RAF1,MAGED1,CDKN2A,UBA52,VEGFA,UBC,SRC,TRAF6,EGFR,IKBKG,YWHAG,MAPK1,PIK3R1,FYN,ABL1,AKT1,RB1,ACTB,PRKACA,UBB,MAPK3,PTPN11,CBL,SHC1,RPS27A,TGFBR1,PPP2CA,NPM1,CRK,PPP2R1A,EEF1A1,LYN,NCK1,MAPK14,JAK2,CDK1,DAXX,SYK,ERBB2,CDKN1A,PRKCZ,PLK1,SIRT1,XRCC5,MAP3K14,APP,IRS1,SFN,CDC42,PAK1,APC,HGS,CAV1,HSP90AA1,CDK4,ARRB1,CEBPA,CDC37,CCND1,INSR,PARK2,PTK2B,P…
GO:BP	nitrogen compound metabolic process	GO:0006807	1.20E-29	28.92040474	10039	618	487	17847	RNF220,RORC,SNRPF,CLNS1A,HPDL,LPIN2,CLTA,TMEM119,SERPINA6,TMEM14C,PSRC1,ENOPH1,NFE2,GMDS,SEPHS1,AIMP2,PRAMEF6,UBE2D3,COL2A1,HFE2,PTPN6,STK38,ANKRD1,ATP6AP2,COMP,NR1H2,CDC123,PPIAL4G,CSDA,MYH6,PFKFB4,DUX4,MEPE,PHIP,RAB8A,FHL2,NIPBL,EXOSC1,NBL1,SIRT2,PAMR1,PRKCD,TSLP,AMZ2,NR4A1,BAG3,SNRPN,TRIB1,MRPL14,PSMC2,PLA2G2A,PRAMEF10,CD320,ZMYM6,MYOCD,TXN,MEN1,DCAF7,HFE,RPUSD1,MRPS11,ACACA,RFC4,GCAT,TOP2A,MR…
GO:BP	regulation of multi-organism process	GO:0043900	3.97E-29	28.40128269	773	618	102	17847	UBE2D3,PTPN6,NR1H2,SIRT2,PRKCD,TRIB1,PSMC2,TOP2A,FGG,RAF1,PSMA5,UBA52,UBC,ESR1,SRC,EP300,CREBBP,TRAF6,HDAC1,JUN,IKBKG,IKBKE,FYN,UBE2D2,PRKCA,RELA,SP1,HDAC2,NFKB1,PRKACA,UBB,MAPK3,PTPN11,PRKDC,SIN3A,RPS27A,PML,SMARCA4,STAT1,NFKBIA,CRK,PPP2R1A,PPARG,SUMO1,LYN,IKBKB,HDAC4,POLR2A,JAK2,SYK,XRCC5,CHUK,DHX9,CDK9,CASP8,TRIM28,PAK1,SMURF2,PSMC5,VAV1,CAV1,HSPA1A,BCL2,JAK1,CDC37,ARRB2,DDB1,PARK2,PSMA1,KPNA2…
GO:BP	positive regulation of phosphorylation	GO:0042327	4.51E-29	28.34589753	1077	618	122	17847	TMEM119,PSRC1,PFKFB4,PRKCD,TSLP,PLA2G2A,TXN,HFE,TGFB3,APLNR,FGG,RAF1,MAGED1,WNT7A,UBA52,VEGFA,UBC,TP53,SRC,TRAF6,AR,EGFR,JUN,IKBKG,CTNNB1,MAPK1,FYN,ABL1,AKT1,PRKCA,HDAC2,SMAD4,STAT3,PRKACA,UBB,MAPK3,PTPN11,SHC1,RPS27A,HDAC3,TGFBR1,PPP2CA,CRK,TNFRSF1A,LYN,MAPK14,JAK2,CDK1,DAXX,SYK,ERBB2,PIN1,CDKN1A,HIF1A,PRKCZ,PLK1,SIRT1,XRCC5,MAP3K14,APP,IRS1,CDK9,ATM,CDC42,PAK1,CAV1,HSP90AA1,BCL2,ARRB1,ARRB2,CCN…
GO:BP	multicellular organismal process	GO:0032501	1.13E-28	27.94852295	7775	618	412	17847	RORC,CLTA,TMEM119,CMTM8,TMEM14C,CRELD1,LRRC8A,JSRP1,NFE2,AIMP2,COL2A1,MT1G,PTPN6,ANKRD1,ATP6AP2,COMP,OR4F17,NR1H2,CSDA,ODF4,CEP250,NPHP1,MYH6,PMP22,EFNB1,DUX4,MEPE,MFAP2,FMNL3,FRAT2,RAB8A,FHL2,NIPBL,NBL1,SIRT2,PRKCD,TSLP,S100P,NR4A1,BAG3,WDR72,RYR1,TRIB1,BOC,TCAP,IL17B,ESPN,PSMC2,MYL2,PLA2G2A,SLC38A10,PLXNB1,ZMYM6,MYOCD,MYOM1,TUBB2B,PPDPF,TNNT3,ADIPOR2,MEN1,DCAF7,HFE,COX17,S100A4,ACACA,HSPB7,TOP2…
GO:BP	steroid hormone mediated signaling pathway	GO:0043401	1.39E-28	27.85708672	184	618	51	17847	RORC,NR1H2,FHL2,NR4A1,RXRA,RUNX1,ESR1,SRC,EP300,HDAC1,AR,BRCA1,CTNNB1,NR3C1,RB1,RARA,NCOR1,PARP1,SMARCA4,NCOR2,NCOA1,NCOA3,PPARG,JAK2,DAXX,SIRT1,VDR,HTATIP,ESR2,THRB,PAK1,THRA,YWHAH,ARRB2,NEDD4,NRIP1,HDAC6,NR0B2,PHB2,STRN3,RXRB,PPARA,PHB,PPARGC1A,CARM1,RHOA,AXIN1,DDX17,DAB2,CDK7,NR1H3
GO:BP	cellular response to lipid	GO:0071396	1.50E-28	27.82334011	618	618	90	17847	RORC,ANKRD1,NR1H2,FHL2,NR4A1,TRIB1,ACACA,RXRA,H2AFZ,RUNX1,DDX18,ESR1,SRC,EP300,TRAF6,HDAC1,AR,EGFR,BRCA1,CTNNB1,MAPK1,ABL1,AKT1,NR3C1,RB1,PRKCA,RELA,HDAC2,NFKB1,RARA,MAPK3,NCOR1,PARP1,SMARCA4,NCOR2,NFKBIA,NCOA1,NCOA3,RUVBL2,PPARG,CEBPB,LYN,VIM,MAPK14,JAK2,DAXX,SIRT1,XRCC5,VDR,IRS1,HTATIP,ESR2,ATM,MAPK8,THRB,PAK1,CREB1,THRA,E2F1,HDAC5,MYOD1,YWHAH,CDK4,ARRB2,NEDD4,TNFRSF1B,BCR,PTK2B,PRKCE,NFKBIB,NR…
GO:BP	hemopoiesis	GO:0030097	1.75E-28	27.75678098	905	618	110	17847	RORC,TMEM14C,LRRC8A,NFE2,MT1G,PTPN6,TRIB1,PSMC2,TOP2A,EPAS1,MB,RUNX2,FOS,RUNX1,CDKN2A,PSMA5,ALAS2,VEGFA,TP53,SRC,EP300,CREBBP,TRAF6,HDAC1,MYC,JUN,CTNNB1,PIK3R1,ABL1,RB1,PRKCA,STAT3,RARA,PTPN11,PRKDC,LCK,SIN3A,PARP1,PML,STAT1,NFKBIA,PPARG,CEBPB,LYN,HDAC4,MAPK14,JAK2,SYK,ERBB2,HIF1A,PRKCZ,SIRT1,NCOA6,XRCC5,APP,ATM,CASP8,CDC42,ZBTB16,PSMC5,VAV1,CREB1,THRA,HDAC5,HSPA1A,BCL2,CEBPA,FANCA,PRKCB,ETS1,BCR…
GO:BP	response to nitrogen compound	GO:1901698	3.93E-28	27.40537818	1150	618	125	17847	LPIN2,ATP6V1B2,PHIP,RAB8A,SIRT2,PRKCD,NR4A1,RYR1,MEN1,SLC3A2,FOLR1,CHRNA4,ASNS,IRF5,TMUB1,FOS,ACTA1,TP53,GRB2,SRC,EGFR,JUN,BRCA1,YWHAG,CTNNB1,MAPK1,PIK3R1,FYN,MDM2,ABL1,AKT1,ACTB,RELA,SP1,HDAC2,NFKB1,STAT3,PRKACA,PCNA,MAPK3,PTPN11,PRKDC,SHC1,SIN3A,PARP1,NCOR2,NPM1,STAT1,NFKBIA,CRK,GSK3B,PPARG,CEBPB,LYN,VIM,NCK1,MAPK14,JAK2,FLNA,CDK1,DAXX,SYK,CDKN1A,PRKCZ,SIRT1,APP,IRS1,CHUK,DHX9,STUB1,PAK1,APC,CR…
GO:BP	positive regulation of protein phosphorylation	GO:0001934	5.36E-28	27.27122714	1025	618	117	17847	TMEM119,PSRC1,PRKCD,TSLP,PLA2G2A,TXN,HFE,TGFB3,APLNR,FGG,RAF1,MAGED1,WNT7A,UBA52,VEGFA,UBC,TP53,SRC,TRAF6,AR,EGFR,JUN,IKBKG,CTNNB1,MAPK1,FYN,ABL1,AKT1,PRKCA,HDAC2,SMAD4,STAT3,PRKACA,UBB,MAPK3,PTPN11,SHC1,RPS27A,HDAC3,TGFBR1,PPP2CA,CRK,TNFRSF1A,LYN,MAPK14,JAK2,CDK1,DAXX,SYK,ERBB2,PIN1,CDKN1A,PRKCZ,PLK1,SIRT1,XRCC5,MAP3K14,APP,CDK9,ATM,CDC42,PAK1,CAV1,HSP90AA1,BCL2,ARRB1,ARRB2,CCND1,SQSTM1,INSR,PTK…
GO:BP	regulation of protein kinase activity	GO:0045859	5.40E-28	27.26733606	797	618	102	17847	PSRC1,PTPN6,STK38,PRKCD,TRIB1,MYOCD,TXN,MEN1,TGFB3,RAF1,MAGED1,CDKN2A,UBA52,VEGFA,UBC,SRC,TRAF6,EGFR,IKBKG,YWHAG,MAPK1,FYN,ABL1,AKT1,RB1,ACTB,PRKACA,UBB,MAPK3,PTPN11,CBL,SHC1,RPS27A,TGFBR1,PPP2CA,NPM1,CRK,PPP2R1A,LYN,NCK1,MAPK14,JAK2,CDK1,DAXX,SYK,ERBB2,CDKN1A,PRKCZ,PLK1,SIRT1,XRCC5,MAP3K14,APP,SFN,PAK1,APC,HGS,CAV1,HSP90AA1,CDK4,ARRB1,CEBPA,CDC37,CCND1,INSR,PTK2B,PAK2,XRCC6,TNIK,GH1,ILK,MAP3K5,T…
GO:BP	mitotic cell cycle	GO:0000278	1.11E-27	26.9559057	1033	618	117	17847	ACTR1B,PSRC1,PTPN6,CEP250,PHIP,NIPBL,SIRT2,PSMC2,TUBB2B,CKAP5,MEN1,TOP2A,NEK6,AATF,ASNS,TACC1,CDKN2A,RAE1,CDK2AP2,TPR,PSMA5,CTDSP2,NSMCE2,TP53,EP300,MYC,EGFR,SMAD3,BRCA1,YWHAG,CTNNB1,MDM2,ABL1,AKT1,RB1,PRKCA,PRKACA,PCNA,PTPN11,PRKDC,SIN3A,PML,PPP2CA,YWHAE,PPP2R2B,PPP2R1A,MCM7,TUBB,FLNA,CDK1,PIN1,CDKN1A,PLK1,SIRT1,APP,MCM3,SFN,ATM,CDC42,APC,PSMC5,HSP90AA1,E2F1,HSPA1A,CDK4,BCL2,MCM2,CCND1,DDB1,PRKC…
GO:BP	positive regulation of phosphorus metabolic process	GO:0010562	1.22E-27	26.91226108	1147	618	124	17847	TMEM119,PSRC1,PFKFB4,PRKCD,TSLP,PLA2G2A,TXN,HFE,TGFB3,APLNR,FGG,RAF1,MAGED1,WNT7A,UBA52,VEGFA,UBC,TP53,SRC,TRAF6,AR,EGFR,SMAD3,JUN,IKBKG,CTNNB1,MAPK1,FYN,ABL1,AKT1,PRKCA,HDAC2,SMAD4,STAT3,PRKACA,UBB,MAPK3,PTPN11,SHC1,RPS27A,HDAC3,TGFBR1,PPP2CA,CRK,TNFRSF1A,LYN,MAPK14,JAK2,CDK1,DAXX,SYK,ERBB2,PIN1,CDKN1A,HIF1A,PRKCZ,PLK1,SIRT1,XRCC5,MAP3K14,APP,IRS1,CDK9,ATM,CDC42,PAK1,CAV1,HSP90AA1,BCL2,ARRB1,ARR…
GO:BP	positive regulation of phosphate metabolic process	GO:0045937	1.22E-27	26.91226108	1147	618	124	17847	TMEM119,PSRC1,PFKFB4,PRKCD,TSLP,PLA2G2A,TXN,HFE,TGFB3,APLNR,FGG,RAF1,MAGED1,WNT7A,UBA52,VEGFA,UBC,TP53,SRC,TRAF6,AR,EGFR,SMAD3,JUN,IKBKG,CTNNB1,MAPK1,FYN,ABL1,AKT1,PRKCA,HDAC2,SMAD4,STAT3,PRKACA,UBB,MAPK3,PTPN11,SHC1,RPS27A,HDAC3,TGFBR1,PPP2CA,CRK,TNFRSF1A,LYN,MAPK14,JAK2,CDK1,DAXX,SYK,ERBB2,PIN1,CDKN1A,HIF1A,PRKCZ,PLK1,SIRT1,XRCC5,MAP3K14,APP,IRS1,CDK9,ATM,CDC42,PAK1,CAV1,HSP90AA1,BCL2,ARRB1,ARR…
GO:BP	regulation of cellular process	GO:0050794	1.97E-27	26.70447015	11018	618	511	17847	RNF220,RORC,TMEM219,TPCN1,LPIN2,TMEM119,CMTM8,SERPINA6,TMEM14C,CALML6,PSRC1,JSRP1,NFE2,CCNDBP1,GMDS,AIMP2,PRAMEF6,UBE2D3,COL2A1,HFE2,PTPN6,STK38,ANKRD1,ATP6AP2,COMP,OR4F17,NR1H2,CDC123,RUFY4,CSDA,CEP250,NPHP1,PFKFB4,PMP22,EFNB1,DUX4,ATP6V1B2,FMNL3,FRAT2,PHIP,RAB8A,FHL2,NIPBL,EXOSC1,NBL1,PPFIA1,SIRT2,PRKCD,TSLP,NR4A1,BAG3,RYR1,TRIB1,BOC,IL17B,ESPN,PSMC2,IL13RA1,MYL2,PLA2G2A,PRAMEF10,PLXNB1,CD320,G…
GO:BP	positive regulation of multi-organism process	GO:0043902	2.67E-27	26.57317736	535	618	82	17847	UBE2D3,SIRT2,PRKCD,PSMC2,TOP2A,FGG,RAF1,PSMA5,UBA52,UBC,ESR1,SRC,EP300,CREBBP,TRAF6,JUN,IKBKG,IKBKE,FYN,UBE2D2,PRKCA,RELA,SP1,HDAC2,NFKB1,PRKACA,UBB,MAPK3,PRKDC,SIN3A,RPS27A,SMARCA4,NFKBIA,LYN,IKBKB,HDAC4,POLR2A,SYK,XRCC5,CHUK,DHX9,CDK9,CASP8,PAK1,SMURF2,PSMC5,VAV1,CAV1,HSPA1A,ARRB2,DDB1,PSMA1,KPNA2,PAK2,PSMD4,BTRC,TBK1,PRKCE,XRCC6,GTF2B,PSMD2,BTK,TSG101,NOTCH1,PDPK1,SFPQ,HMGB1,PSMA3,PABPC1,ITCH,…
GO:BP	regulation of mitotic cell cycle	GO:0007346	4.79E-27	26.31966022	660	618	91	17847	PSRC1,PTPN6,CEP250,PHIP,NIPBL,SIRT2,PSMC2,CKAP5,TOP2A,NEK6,AATF,ASNS,CDKN2A,RAE1,CDK2AP2,TPR,PSMA5,CTDSP2,NSMCE2,TP53,EP300,EGFR,SMAD3,BRCA1,YWHAG,CTNNB1,MDM2,ABL1,AKT1,RB1,PRKCA,PRKACA,PCNA,PTPN11,PRKDC,SIN3A,PML,YWHAE,PPP2R1A,TUBB,CDK1,PIN1,CDKN1A,PLK1,SIRT1,APP,SFN,ATM,CDC42,APC,PSMC5,HSP90AA1,E2F1,HSPA1A,CDK4,BCL2,CCND1,DDB1,DNCL1,INSR,PSMA1,CHEK1,PSMD4,BTRC,RBL1,ATF2,SMC1L1,RPS6KB1,CLTC,DCTN…
GO:BP	positive regulation of cell differentiation	GO:0045597	4.92E-27	26.30818647	1002	618	114	17847	TMEM119,ANKRD1,NIPBL,NBL1,SIRT2,TRIB1,BOC,PLA2G2A,PLXNB1,MYOCD,TUBB2B,TGFB3,CLDN5,VEZF1,FGG,RUNX2,FOS,RUNX1,SOX11,MIR210,VEGFA,EP300,TRAF6,HDAC1,AR,SMAD3,JUN,SMAD2,CTNNB1,FYN,ABL1,AKT1,RB1,PRKCA,RELA,HDAC2,SMAD4,NFKB1,STAT3,RARA,VHL,SIN3A,PARP1,TGFBR1,STAT1,CRK,NCOA1,NCOA3,PPARG,CEBPB,LYN,NCK1,MAPK14,JAK2,FLNA,SYK,PIN1,HIF1A,PRKCZ,SIRT1,XRCC5,VDR,SFN,SMURF1,CASP8,CDC42,PAK1,ZBTB16,CREB1,E2F1,HSPA…
GO:BP	response to organonitrogen compound	GO:0010243	5.48E-27	26.26153801	1067	618	118	17847	LPIN2,ATP6V1B2,PHIP,RAB8A,SIRT2,PRKCD,NR4A1,RYR1,MEN1,FOLR1,ASNS,IRF5,TMUB1,FOS,ACTA1,TP53,GRB2,SRC,EGFR,JUN,BRCA1,YWHAG,CTNNB1,MAPK1,PIK3R1,FYN,MDM2,ABL1,AKT1,ACTB,RELA,SP1,HDAC2,NFKB1,STAT3,PRKACA,PCNA,MAPK3,PTPN11,PRKDC,SHC1,SIN3A,PARP1,NCOR2,STAT1,NFKBIA,CRK,GSK3B,PPARG,CEBPB,LYN,VIM,NCK1,MAPK14,JAK2,FLNA,CDK1,SYK,CDKN1A,PRKCZ,SIRT1,APP,IRS1,CHUK,STUB1,PAK1,APC,CREB1,CAV1,HSPA5,HDAC5,CDK4,CDH…
GO:BP	cellular response to nitrogen compound	GO:1901699	5.89E-27	26.22985016	718	618	95	17847	LPIN2,ATP6V1B2,PHIP,RAB8A,SIRT2,PRKCD,NR4A1,RYR1,MEN1,FOLR1,CHRNA4,ACTA1,TP53,GRB2,SRC,EGFR,BRCA1,YWHAG,CTNNB1,MAPK1,PIK3R1,FYN,MDM2,ABL1,AKT1,ACTB,RELA,SP1,HDAC2,NFKB1,STAT3,PRKACA,MAPK3,PTPN11,PRKDC,SHC1,SIN3A,PARP1,NPM1,STAT1,CRK,GSK3B,PPARG,CEBPB,LYN,VIM,NCK1,JAK2,FLNA,DAXX,PRKCZ,SIRT1,APP,IRS1,DHX9,PAK1,APC,CREB1,CAV1,HSPA5,HDAC5,CDK4,CDH1,ARRB2,PRKCB,STAT5A,INSR,PARK2,CDC5L,SMARCC1,GH1,RPS6…
GO:BP	regulation of cell cycle process	GO:0010564	6.32E-27	26.19948007	791	618	100	17847	PSRC1,PTPN6,CEP250,DUX4,PHIP,NIPBL,SIRT2,PSMC2,CKAP5,MEN1,NEK6,RPS6KA2,CDKN2A,RAE1,CDK2AP2,TPR,PSMA5,CTDSP2,KLHL21,NSMCE2,TP53,EP300,EGFR,BRCA1,CSNK2A1,YWHAG,CTNNB1,MDM2,AKT1,RB1,PRKACA,PCNA,PRKDC,SIN3A,PML,YWHAE,NPM1,PPP2R1A,TUBB,CDK1,PIN1,CDKN1A,PLK1,RBBP4,CSNK2A2,APP,SFN,TERF1,CDK9,ATM,CDC42,RBBP7,APC,PSMC5,TERF2,HSP90AA1,E2F1,HSPA1A,CDK4,BCL2,XPO1,CCND1,DDB1,DNCL1,INSR,PSMA1,CHEK1,PSMD4,BTRC,…
GO:BP	immune system process	GO:0002376	6.40E-27	26.19407891	3214	618	229	17847	RORC,ACTR1B,CLTA,TMEM14C,LRRC8A,NFE2,UBE2D3,COL2A1,MT1G,PTPN6,ATP6AP2,NR1H2,EFNB1,SIGLEC10,NBL1,SIRT2,PRKCD,TSLP,S100P,TRIB1,IL17B,PSMC2,PLA2G2A,CD320,CD8B,HFE,IFI44L,TOP2A,MT2A,SLC3A2,TGFB3,CHRNA4,FLNB,IRF5,EPAS1,CAP1,MB,KIR2DL3,FGG,SYNGR1,PIP5K1C,DERA,RUNX2,FOS,RUNX1,SOX11,RAF1,CDKN2A,COMMD3,PSMA5,DOK3,ALAS2,UBA52,VEGFA,UBC,TP53,ESR1,GRB2,SRC,EP300,CREBBP,TRAF6,HDAC1,MYC,SMAD3,JUN,IKBKG,CTNNB1,…
GO:BP	regulation of protein serine/threonine kinase activity	GO:0071900	6.61E-27	26.17955857	516	618	80	17847	PSRC1,PTPN6,STK38,PRKCD,TRIB1,MYOCD,MEN1,TGFB3,RAF1,MAGED1,CDKN2A,UBA52,VEGFA,UBC,SRC,TRAF6,EGFR,IKBKG,YWHAG,MAPK1,ABL1,AKT1,RB1,ACTB,UBB,MAPK3,PTPN11,SHC1,RPS27A,TGFBR1,PPP2CA,CRK,PPP2R1A,LYN,MAPK14,JAK2,CDK1,DAXX,SYK,ERBB2,CDKN1A,PLK1,SIRT1,MAP3K14,SFN,PAK1,APC,HGS,CAV1,CDK4,ARRB1,CEBPA,CDC37,CCND1,INSR,PTK2B,TNIK,GH1,ILK,MAP3K5,TSG101,IGF1R,PDGFRB,CSK,MAP2K1,KAT2B,DVL2,MAP3K7,HRAS,KIT,HSPB1,PS…
GO:BP	cellular metabolic process	GO:0044237	8.37E-27	26.07705106	10785	618	503	17847	RNF220,RORC,SNRPF,CLNS1A,HPDL,TPCN1,LPIN2,CLTA,TMEM119,SERPINA6,TMEM14C,PSRC1,ENOPH1,NFE2,GMDS,SEPHS1,AIMP2,PRAMEF6,GK5,UBE2D3,COL2A1,HFE2,PTPN6,STK38,ANKRD1,ATP6AP2,COMP,NR1H2,CDC123,RUFY4,PPIAL4G,CSDA,MYH6,PFKFB4,DUX4,MEPE,ATP6V1B2,PHIP,RAB8A,FHL2,NIPBL,EXOSC1,NBL1,SIRT2,PRKCD,TSLP,NR4A1,BAG3,SNRPN,TRIB1,MRPL14,PSMC2,PLA2G2A,PRAMEF10,CD320,ZMYM6,MYOCD,TXN,ADIPOR2,MEN1,DCAF7,HFE,RPUSD1,MRPS11,CO…
GO:BP	response to decreased oxygen levels	GO:0036293	9.37E-27	26.02823679	373	618	68	17847	ANKRD1,SIRT2,RYR1,PSMC2,MYOCD,TGFB3,CHRNA4,EPAS1,MB,RAF1,MIR210,PSMA5,ALAS2,UBA52,VEGFA,UBC,TP53,SRC,EP300,CREBBP,MYC,SMAD3,MDM2,AKT1,SMAD4,UBB,VHL,CBL,RPS27A,PML,PIN1,HIF1A,SIRT1,STUB1,ATM,PAK1,PSMC5,CREB1,CAV1,E2F1,BCL2,ETS1,PTK2B,PSMA1,PSMD4,PRKCE,SRF,NDRG1,MYB,PSMD2,NOTCH1,PHB2,PSMA3,PSMC1,SUV39H1,ATF4,PPARA,PSMD13,PPARGC1A,RHOA,TGFBR2,MDM4,PSMC6,PSMA6,LMNA,PSMC4,CCNB1,CFLAR
GO:BP	organonitrogen compound metabolic process	GO:1901564	9.40E-27	26.02694256	6854	618	375	17847	RNF220,HPDL,LPIN2,CLTA,TMEM119,SERPINA6,TMEM14C,PSRC1,ENOPH1,SEPHS1,AIMP2,UBE2D3,COL2A1,HFE2,PTPN6,STK38,ATP6AP2,COMP,NR1H2,CDC123,PPIAL4G,CSDA,MYH6,PFKFB4,MEPE,PHIP,RAB8A,NIPBL,SIRT2,PAMR1,PRKCD,TSLP,AMZ2,NR4A1,BAG3,TRIB1,MRPL14,PSMC2,PLA2G2A,CD320,MYOCD,TXN,MEN1,DCAF7,HFE,MRPS11,ACACA,GCAT,MRPS30,TGFB3,RXRA,VCAN,KLK4,UCHL3,NEK6,APLNR,SCD,FOLR1,RPS6KA2,RAB1B,AATF,ASNS,EPAS1,RPS26,TMUB1,FGG,DERA,…
GO:BP	cell development	GO:0048468	9.56E-27	26.01962617	2196	618	180	17847	PARVG,PTPN6,ANKRD1,COMP,MYH6,PMP22,EFNB1,RAB8A,FHL2,NIPBL,NBL1,SIRT2,RYR1,TRIB1,BOC,TCAP,MYL2,PLXNB1,MYOM1,TUBB2B,TNNT3,MEN1,BHLHB3,TGFB3,MYH11,CLDN5,FOLR1,C9ORF47,RPS6KA2,FLNB,EPAS1,VEZF1,FGG,RUNX2,RUNX1,SOX11,SGK1,CLN5,WNT7A,MIR210,ACTA1,SYNPO2L,MYOZ1,VEGFA,TP53,YWHAZ,ESR1,GRB2,SRC,EP300,TRAF6,HDAC1,AR,EGFR,SMAD3,JUN,YWHAG,CTNNB1,MAPK1,PIK3R1,FYN,MDM2,ABL1,AKT1,RB1,PRKCA,ACTB,RELA,HDAC2,SMAD4,S…
GO:BP	protein-containing complex subunit organization	GO:0043933	1.00E-26	25.99979703	2177	618	179	17847	SNRPF,CLNS1A,ACTR6,CLTA,SAMM50,PSRC1,LRRC8A,NFE2,AIMP2,COL2A1,COMP,CDC123,FRAT2,SIRT2,PRKCD,FOXRED1,RYR1,TCAP,MRPL14,PSMC2,PLA2G2A,MYOM1,CKAP5,CENPN,MEN1,HFE,MRPS11,COX17,ACACA,MRPS30,MYH11,FOLR1,RAB1B,FGG,PANX3,MRPL53,RAF1,SLN,DHX30,TSPY2,TPR,KLHL21,UBA52,VEGFA,UBC,TP53,ESR1,GRB2,SRC,EP300,CREBBP,HDAC1,MYC,SMAD3,SMAD2,CTNNB1,IKBKE,MDM2,ABL1,RB1,SMAD4,PRKACA,UBB,MAPK3,PTPN11,YWHAB,RPS27A,PARP1,PM…
GO:BP	positive regulation of organelle organization	GO:0010638	1.01E-26	25.99665323	625	618	88	17847	PSRC1,UBE2D3,PHIP,NIPBL,SIRT2,TGFB3,SYNPO2L,TPR,NSMCE2,VEGFA,TP53,YWHAZ,GRB2,SRC,SMAD3,BRCA1,YWHAG,CTNNB1,MAPK1,ABL1,RB1,SMAD4,MAPK3,YWHAQ,YWHAB,SIN3A,PML,TGFBR1,YWHAE,RUVBL2,GSK3B,NCK1,FLNA,HIF1A,SIRT1,XRCC5,CSNK2A2,RIF1,SFN,SMURF1,TERF1,CDK9,ATM,MAPK8,CASP8,TRIM28,CDC42,PAK1,ARF6,E2F1,HSPA1A,YWHAH,BCL2,ARRB1,CDC37,PRKCB,ATR,INSR,PARK2,PTK2B,HNRPA1,PRKCE,MAPT,HDAC6,DCTN1,SETDB1,MYB,PDGFRB,PHB2,A…
GO:BP	tissue development	GO:0009888	1.08E-26	25.96816381	2080	618	174	17847	RORC,TMEM119,CRELD1,AIMP2,COL2A1,ANKRD1,ATP6AP2,COMP,CSDA,MYH6,EFNB1,MEPE,FHL2,SIRT2,NR4A1,WDR72,RYR1,TCAP,PSMC2,MYL2,MYOCD,MYOM1,MEN1,S100A4,TGFB3,RXRA,KLK4,MYH11,CLDN5,FOLR1,C9ORF47,FLNB,VEZF1,XIRP2,RUNX2,MYH7,FOS,RUNX1,SOX11,MAGED1,WNT7A,ACTA1,TSPY2,PSMA5,MYOZ1,VEGFA,TP53,ESR1,GRB2,SRC,EP300,TRAF6,HDAC1,MYC,AR,EGFR,SMAD3,JUN,SMAD2,CTNNB1,MAPK1,MDM2,ABL1,AKT1,RB1,RELA,HDAC2,SMAD4,PRKACA,UBB,RAR…
GO:BP	regulation of DNA-binding transcription factor activity	GO:0051090	1.36E-26	25.86756772	434	618	73	17847	TRIB1,MYOCD,MEN1,FOS,SGK1,CDKN2A,UBA52,VEGFA,UBC,ESR1,EP300,TRAF6,AR,SMAD3,JUN,IKBKG,CTNNB1,MAPK1,AKT1,RB1,RELA,HDAC2,NFKB1,STAT3,UBB,MAPK3,RPS27A,SMARCA4,NPM1,NFKBIA,PPARG,SUMO1,IKBKB,HDAC4,MAPK14,JAK2,FLNA,SYK,PRKCZ,SIRT1,APP,CHUK,DHX9,ESR2,MAPK8,NFKB2,CAV1,COPS5,HDAC5,HSPA1A,ARRB1,FANCA,ARRB2,PRKCB,BTRC,ATF2,SRF,USP7,NR0B2,BTK,PHB2,DVL2,TCF3,ITCH,MAP3K7,SMARCB1,KIT,PPARGC1A,CARM1,TAF1,PSMA6,CF…
GO:BP	cell activation	GO:0001775	1.90E-26	25.72192888	1455	618	140	17847	RORC,ACTR1B,LRRC8A,MT1G,PTPN6,ATP6AP2,COMP,EFNB1,PRKCD,TSLP,S100P,PSMC2,PLA2G2A,CD320,CD8B,HFE,CHRNA4,CAP1,FGG,SYNGR1,DERA,RUNX2,RUNX1,SOX11,RAF1,WNT7A,CDKN2A,COMMD3,PSMA5,DOK3,TP53,YWHAZ,GRB2,SRC,EP300,TRAF6,EGFR,SMAD3,JUN,CTNNB1,MAPK1,PIK3R1,FYN,ABL1,AKT1,PRKCA,ACTB,SMAD4,NFKB1,STAT3,RARA,MAPK3,PTPN11,PRKDC,LCK,CBL,TGFBR1,HSPA8,EEF1A1,CEBPB,LYN,TUBB,NCK1,HDAC4,MAPK14,JAK2,FLNA,SYK,ERBB2,CDKN1A,…
GO:BP	response to hypoxia	GO:0001666	6.93E-26	25.15948553	362	618	66	17847	ANKRD1,SIRT2,RYR1,PSMC2,MYOCD,TGFB3,CHRNA4,EPAS1,MB,RAF1,MIR210,PSMA5,ALAS2,UBA52,VEGFA,UBC,TP53,SRC,EP300,CREBBP,MYC,SMAD3,MDM2,AKT1,SMAD4,UBB,VHL,RPS27A,PML,PIN1,HIF1A,SIRT1,STUB1,ATM,PAK1,PSMC5,CREB1,CAV1,E2F1,BCL2,ETS1,PTK2B,PSMA1,PSMD4,PRKCE,SRF,NDRG1,MYB,PSMD2,NOTCH1,PHB2,PSMA3,PSMC1,SUV39H1,PPARA,PSMD13,PPARGC1A,RHOA,TGFBR2,MDM4,PSMC6,PSMA6,LMNA,PSMC4,CCNB1,CFLAR
GO:BP	circulatory system development	GO:0072359	7.88E-26	25.10359128	1181	618	123	17847	CRELD1,COL2A1,ANKRD1,COMP,MYH6,FMNL3,FHL2,NIPBL,NR4A1,RYR1,TCAP,MYL2,MYOCD,MYOM1,ADIPOR2,COX17,HSPB7,RXRA,MYH11,CLDN5,APLNR,FOLR1,RPS6KA2,EPAS1,VEZF1,XIRP2,MB,MYH7,RUNX1,SOX11,RAF1,WNT7A,MIR210,SYNPO2L,VEGFA,TP53,EP300,EGFR,SMAD3,JUN,SMAD2,BRCA1,CTNNB1,MAPK1,MDM2,ABL1,AKT1,RB1,PRKCA,SP1,SMAD4,STAT3,RARA,PCNA,MAPK3,PTPN11,PRKDC,PLCG1,SHC1,PML,TGFBR1,STAT1,PPARG,SMAD1,TNFRSF1A,MAPK14,CDK1,SYK,ERBB2…
GO:BP	regulation of organelle organization	GO:0033043	8.75E-26	25.05805052	1284	618	129	17847	PSRC1,UBE2D3,CEP250,PHIP,NIPBL,PPFIA1,SIRT2,PRKCD,BAG3,ESPN,PLXNB1,MYOCD,TOP2A,TGFB3,INF2,NEK6,RPS6KA2,RAB1B,RAE1,SYNPO2L,CDK2AP2,TPR,NSMCE2,VEGFA,TP53,YWHAZ,GRB2,SRC,MYC,SMAD3,BRCA1,YWHAG,CTNNB1,MAPK1,PIK3R1,ABL1,AKT1,RB1,SMAD4,MAPK3,YWHAQ,YWHAB,SIN3A,PARP1,PML,TGFBR1,YWHAE,NPM1,CRK,RUVBL2,GSK3B,NCK1,FLNA,PIN1,HIF1A,PLK1,SIRT1,XRCC5,CSNK2A2,RIF1,SFN,SMURF1,TERF1,CDK9,ATM,MAPK8,CASP8,TRIM28,CDC42…
GO:BP	response to steroid hormone	GO:0048545	9.50E-26	25.02213511	387	618	68	17847	RORC,NR1H2,FHL2,NR4A1,TGFB3,RXRA,FOS,RUNX1,ACTA1,ESR1,SRC,EP300,HDAC1,AR,EGFR,BRCA1,CTNNB1,MDM2,NR3C1,RB1,RELA,RARA,PCNA,NCOR1,PARP1,SMARCA4,NCOR2,NCOA1,NCOA3,PPARG,JAK2,DAXX,CDKN1A,SIRT1,VDR,HTATIP,ESR2,THRB,RBBP7,PAK1,CAV1,THRA,MYOD1,YWHAH,BCL2,ARRB2,NEDD4,CCND1,NCOA2,NRIP1,HDAC6,NR0B2,NOTCH1,PHB2,STRN3,RXRB,PPARA,PHB,PPARGC1A,CARM1,RHOA,TGFBR2,AXIN1,DDX17,DAB2,CDK7,CFLAR,NR1H3
GO:BP	regulation of localization	GO:0032879	1.83E-25	24.7367024	2893	618	211	17847	TPCN1,JSRP1,UBE2D3,PTPN6,ANKRD1,NR1H2,CEP250,RAB8A,NIPBL,NBL1,PPFIA1,PRKCD,TSLP,BAG3,RYR1,TRIB1,PLXNB1,MYOCD,TXN,MYOM1,TUBB2B,ADIPOR2,HFE,COX17,TGFB3,CLDN5,APLNR,CHRNA4,FGG,PANX3,SOX11,ATP2A1,RAF1,SGK1,MAGED1,WNT7A,SLN,CACNG6,MIR210,FBXL20,TPR,VEGFA,TP53,YWHAZ,SRC,TRAF6,AR,EGFR,SMAD3,JUN,YWHAG,CTNNB1,MAPK1,IKBKE,PIK3R1,FYN,MDM2,ABL1,AKT1,RB1,PRKCA,ACTB,SP1,SMAD4,NFKB1,STAT3,MCC,PRKACA,MAPK3,PTPN1…
GO:BP	cellular response to organonitrogen compound	GO:0071417	1.90E-25	24.72143916	664	618	89	17847	LPIN2,ATP6V1B2,PHIP,RAB8A,SIRT2,PRKCD,NR4A1,RYR1,MEN1,FOLR1,ACTA1,TP53,GRB2,SRC,EGFR,BRCA1,YWHAG,CTNNB1,MAPK1,PIK3R1,FYN,MDM2,ABL1,AKT1,ACTB,RELA,SP1,HDAC2,NFKB1,STAT3,PRKACA,MAPK3,PTPN11,PRKDC,SHC1,SIN3A,PARP1,STAT1,CRK,GSK3B,PPARG,CEBPB,LYN,VIM,NCK1,JAK2,FLNA,PRKCZ,SIRT1,APP,IRS1,PAK1,APC,CREB1,CAV1,HSPA5,HDAC5,CDK4,CDH1,ARRB2,PRKCB,STAT5A,INSR,PARK2,CDC5L,SMARCC1,GH1,RPS6KB1,STAT5B,IGF1R,PDPK1…
GO:BP	regulation of cellular localization	GO:0060341	2.20E-25	24.65844762	918	618	106	17847	JSRP1,UBE2D3,PTPN6,CEP250,NIPBL,PPFIA1,PRKCD,BAG3,TXN,HFE,APLNR,CHRNA4,ATP2A1,MAGED1,WNT7A,MIR210,FBXL20,TPR,TP53,YWHAZ,SRC,AR,EGFR,SMAD3,YWHAG,CTNNB1,MAPK1,PIK3R1,FYN,MDM2,ABL1,AKT1,RB1,ACTB,PRKACA,MAPK3,PTPN11,PLCG1,YWHAQ,YWHAB,SIN3A,HDAC3,PARP1,PML,YWHAE,GSK3B,LYN,MAPK14,FLNA,CDK1,SYK,ERBB2,PIN1,EPB41,HIF1A,PRKCZ,PLK1,CSNK2A2,DHX9,SFN,TERF1,MAPK8,CASP8,TRIM28,CDC42,PAK1,APC,ARF6,CAV1,HSP90AA1,…
GO:BP	regulation of immune response	GO:0050776	2.68E-25	24.57121287	1113	618	118	17847	UBE2D3,COL2A1,PTPN6,NR1H2,PRKCD,PSMC2,CD8B,HFE,TGFB3,KIR2DL3,FGG,FOS,RUNX1,RAF1,PSMA5,UBA52,UBC,ESR1,GRB2,SRC,EP300,CREBBP,TRAF6,SMAD3,JUN,IKBKG,MAPK1,IKBKE,PIK3R1,FYN,ABL1,UBE2D2,ACTB,RELA,NFKB1,PRKACA,UBB,RARA,MAPK3,PTPN11,PRKDC,PLCG1,LCK,SHC1,SIN3A,RPS27A,STAT1,NFKBIA,CRK,PPARG,SUMO1,LYN,IKBKB,NCK1,MAPK14,JAK2,SYK,PRKCZ,SIRT1,XRCC5,RIF1,CHUK,DHX9,MAPK8,CASP8,CDC42,PAK1,ACTG1,PSMC5,VAV1,CAV1,HS…
GO:BP	positive regulation of immune system process	GO:0002684	5.62E-25	24.2500629	1189	618	122	17847	UBE2D3,PTPN6,EFNB1,PRKCD,TSLP,TRIB1,PSMC2,CD320,HFE,FGG,FOS,RUNX1,RAF1,PSMA5,UBA52,VEGFA,UBC,ESR1,GRB2,SRC,EP300,CREBBP,TRAF6,JUN,IKBKG,MAPK1,IKBKE,PIK3R1,FYN,ABL1,AKT1,UBE2D2,RB1,PRKCA,ACTB,RELA,NFKB1,STAT3,PRKACA,UBB,RARA,MAPK3,PTPN11,PRKDC,PLCG1,LCK,SIN3A,RPS27A,STAT1,NFKBIA,CRK,LYN,IKBKB,NCK1,MAPK14,SYK,CDKN1A,HIF1A,PRKCZ,SIRT1,XRCC5,APP,RIF1,CHUK,DHX9,CASP8,CDC42,PAK1,ACTG1,ZBTB16,PSMC5,VAV1…
GO:BP	regulation of biological process	GO:0050789	6.71E-25	24.17295877	11778	618	527	17847	RNF220,RORC,TMEM219,TPCN1,LPIN2,CLTA,TMEM119,CMTM8,SERPINA6,TMEM14C,CALML6,PSRC1,JSRP1,NFE2,CCNDBP1,GMDS,AIMP2,PRAMEF6,UBE2D3,COL2A1,MT1G,HFE2,PTPN6,STK38,ANKRD1,ATP6AP2,COMP,OR4F17,NR1H2,CDC123,RUFY4,CSDA,CEP250,NPHP1,MYH6,PFKFB4,PMP22,EFNB1,DUX4,MFAP2,ATP6V1B2,SIGLEC10,FMNL3,FRAT2,PHIP,RAB8A,FHL2,NIPBL,EXOSC1,NBL1,PPFIA1,SIRT2,PRKCD,TSLP,NR4A1,BAG3,RYR1,TRIB1,BOC,IL17B,ESPN,PSMC2,IL13RA1,MYL2,P…
GO:BP	hormone-mediated signaling pathway	GO:0009755	7.27E-25	24.13826734	236	618	53	17847	RORC,NR1H2,FHL2,NR4A1,ADIPOR2,RXRA,RUNX1,ESR1,SRC,EP300,HDAC1,AR,BRCA1,CTNNB1,NR3C1,RB1,RARA,PTPN11,NCOR1,PARP1,SMARCA4,NCOR2,NCOA1,NCOA3,PPARG,JAK2,DAXX,SIRT1,VDR,HTATIP,ESR2,THRB,PAK1,THRA,YWHAH,ARRB2,NEDD4,NRIP1,HDAC6,NR0B2,PHB2,STRN3,RXRB,PPARA,PHB,PPARGC1A,CARM1,RHOA,AXIN1,DDX17,DAB2,CDK7,NR1H3
GO:BP	mitotic cell cycle process	GO:1903047	7.76E-25	24.11026426	885	618	103	17847	ACTR1B,PSRC1,PTPN6,CEP250,PHIP,NIPBL,SIRT2,PSMC2,CKAP5,TOP2A,NEK6,TACC1,CDKN2A,RAE1,CDK2AP2,TPR,PSMA5,CTDSP2,NSMCE2,TP53,EP300,MYC,EGFR,BRCA1,YWHAG,MDM2,AKT1,RB1,PRKCA,PRKACA,PCNA,PRKDC,SIN3A,PML,PPP2CA,YWHAE,PPP2R1A,MCM7,TUBB,FLNA,CDK1,PIN1,CDKN1A,PLK1,APP,MCM3,SFN,ATM,CDC42,APC,PSMC5,HSP90AA1,E2F1,HSPA1A,CDK4,BCL2,MCM2,CCND1,DDB1,PRKCB,DNCL1,INSR,PSMA1,CHEK1,PSMD4,BTRC,VCP,RBL1,ATF2,SMC1L1,RPS6…
GO:BP	protein-containing complex assembly	GO:0065003	1.37E-24	23.86191452	1852	618	158	17847	SNRPF,CLNS1A,CLTA,SAMM50,PSRC1,LRRC8A,AIMP2,CDC123,SIRT2,PRKCD,FOXRED1,RYR1,TCAP,PSMC2,MYOM1,CKAP5,CENPN,MEN1,HFE,MRPS11,COX17,ACACA,MYH11,FOLR1,RAB1B,FGG,PANX3,RAF1,DHX30,TSPY2,KLHL21,UBA52,VEGFA,UBC,TP53,ESR1,GRB2,SRC,EP300,CREBBP,HDAC1,MYC,SMAD3,SMAD2,CTNNB1,IKBKE,MDM2,ABL1,RB1,SMAD4,PRKACA,UBB,MAPK3,PTPN11,YWHAB,RPS27A,PARP1,PML,SMARCA4,HSPA8,H2AFX,NPM1,TBP,RUVBL2,PPP2R1A,GSK3B,MCM7,SMAD1,SUM…
GO:BP	cellular response to steroid hormone stimulus	GO:0071383	1.41E-24	23.84985518	249	618	54	17847	RORC,NR1H2,FHL2,NR4A1,RXRA,RUNX1,ESR1,SRC,EP300,HDAC1,AR,EGFR,BRCA1,CTNNB1,NR3C1,RB1,RARA,NCOR1,PARP1,SMARCA4,NCOR2,NCOA1,NCOA3,PPARG,JAK2,DAXX,SIRT1,VDR,HTATIP,ESR2,THRB,PAK1,THRA,MYOD1,YWHAH,ARRB2,NEDD4,NRIP1,HDAC6,NR0B2,PHB2,STRN3,RXRB,PPARA,PHB,PPARGC1A,CARM1,RHOA,AXIN1,DDX17,DAB2,CDK7,CFLAR,NR1H3
GO:BP	positive regulation of cell population proliferation	GO:0008284	1.50E-24	23.82392094	955	618	107	17847	TMEM119,PRAMEF6,PTPN6,COMP,CDC123,EFNB1,PHIP,TSLP,NR4A1,PRAMEF10,CD320,MYOCD,COX17,TGFB3,APLNR,C9ORF47,TNS3,RUNX2,SOX11,WNT7A,VEGFA,ESR1,TRAF6,HDAC1,MYC,AR,EGFR,JUN,CSNK2A1,CTNNB1,MAPK1,MDM2,ABL1,AKT1,PRKCA,RELA,SP1,HDAC2,SMAD4,STAT3,RARA,PRKDC,PLCG1,SHC1,PML,TGFBR1,NPM1,STAT1,LYN,NCK1,HDAC4,MAPK14,JAK2,FLNA,CDK1,SYK,ERBB2,CDKN1A,HIF1A,PRKCZ,SIRT1,IRS1,DHX9,CDC42,PAK1,E2F1,CDK4,BCL2,ARRB1,FN1,CCN…
GO:BP	heart development	GO:0007507	2.50E-24	23.60206969	589	618	82	17847	CRELD1,COL2A1,ANKRD1,MYH6,FHL2,NIPBL,RYR1,TCAP,MYL2,MYOCD,MYOM1,ADIPOR2,COX17,HSPB7,RXRA,MYH11,CLDN5,APLNR,FOLR1,RPS6KA2,XIRP2,MB,MYH7,SOX11,RAF1,SYNPO2L,VEGFA,TP53,EP300,EGFR,SMAD3,JUN,SMAD2,CTNNB1,MAPK1,MDM2,RB1,SMAD4,RARA,PCNA,MAPK3,PTPN11,PRKDC,SHC1,TGFBR1,PPARG,TNFRSF1A,MAPK14,CDK1,ERBB2,PIN1,CDKN1A,HIF1A,NCOA6,ATM,CDC42,PAK1,CREB1,ARRB2,TNFRSF1B,INSR,YY1,ATF2,SRF,ILK,NOTCH1,PDGFRB,MAP2K1,AN…
GO:BP	proteolysis	GO:0006508	2.89E-24	23.53954585	1807	618	155	17847	SERPINA6,UBE2D3,HFE2,ATP6AP2,COMP,SIRT2,PAMR1,AMZ2,NR4A1,TRIB1,PSMC2,HFE,KLK4,UCHL3,RPS6KA2,TMUB1,FGG,RAF1,PRSS21,UBA1,CLN5,FBXL20,CDKN2A,PSMA5,UBA52,VEGFA,UBC,TP53,ESR1,SRC,EP300,TRAF6,HDAC1,MYC,AR,SMAD3,SMAD2,BRCA1,IKBKG,CSNK2A1,CTNNB1,FYN,MDM2,AKT1,UBE2D2,ACTB,RELA,HDAC2,UBE2I,SMAD4,NFKB1,STAT3,PRKACA,UBB,VHL,MAPK3,LCK,CBL,RPS27A,PARP1,PML,TGFBR1,YWHAE,NFKBIA,GSK3B,PPARG,SMAD1,SUMO1,LYN,SUMO2,…
GO:BP	transmembrane receptor protein tyrosine kinase signaling pathway	GO:0007169	3.09E-24	23.51071031	733	618	92	17847	EFNB1,ATP6V1B2,PHIP,SIRT2,PRKCD,CD8B,MYOCD,RUNX2,RAF1,VEGFA,GRB2,SRC,AR,EGFR,CTNNB1,MAPK1,PIK3R1,FYN,ABL1,AKT1,PRKCA,ACTB,RELA,STAT3,MAPK3,PTPN11,PLCG1,LCK,CBL,SHC1,CRK,GSK3B,LYN,NCK1,POLR2A,MAPK14,JAK2,SYK,ERBB2,HIF1A,PRKCZ,SIRT1,APP,IRS1,STUB1,CDC42,PAK1,APC,HGS,ACTG1,VAV1,HSP90AA1,CDK4,CDC37,NEDD4,PRKCB,STAT5A,BCR,INSR,PTK2B,HNRPA1,PAK2,SMARCC1,GH1,RPS6KB1,STAT5B,TSG101,IGF1R,PTP4A3,PDGFRB,PDP…
GO:BP	regulation of cellular protein localization	GO:1903827	4.11E-24	23.3858206	539	618	78	17847	UBE2D3,CEP250,NIPBL,PPFIA1,PRKCD,BAG3,TXN,HFE,MAGED1,TPR,TP53,YWHAZ,SRC,AR,EGFR,SMAD3,YWHAG,CTNNB1,MAPK1,PIK3R1,FYN,MDM2,AKT1,RB1,ACTB,PRKACA,PTPN11,YWHAQ,YWHAB,SIN3A,HDAC3,PARP1,YWHAE,GSK3B,MAPK14,FLNA,CDK1,ERBB2,PIN1,EPB41,PRKCZ,PLK1,CSNK2A2,SFN,TERF1,MAPK8,CASP8,TRIM28,CDC42,PAK1,APC,ARF6,HSP90AA1,E2F1,YWHAH,CDH1,BCL2,XPO1,SQSTM1,PARK2,PRKCE,MAPT,CLTC,TSG101,PDPK1,CSK,TCP1,HRAS,BARD1,ITGB1,PSE…
GO:BP	regulation of cellular response to stress	GO:0080135	4.30E-24	23.36690893	751	618	93	17847	ANKRD1,CSDA,PRKCD,BAG3,TXN,MEN1,NEK6,WNT7A,MIR210,CDKN2A,RAE1,TPR,VEGFA,TP53,EP300,CREBBP,TRAF6,MYC,EGFR,BRCA1,CTNNB1,MAPK1,PIK3R1,FYN,MDM2,ABL1,AKT1,PCNA,MAPK3,PRKDC,NCOR1,HDAC3,PARP1,PML,HSPA8,YWHAE,H2AFX,NPM1,GSK3B,LYN,NCK1,DAXX,SYK,HIF1A,SIRT1,APP,RIF1,DHX9,CDK9,ATM,TRIM28,CDC42,PAK1,TERF2,CAV1,HSP90AA1,COPS5,HSPA5,HSPA1A,BCL2,ATR,MGMT,PARK2,PTK2B,CHEK1,RBL1,TNIK,MAPT,HDAC6,UBQLN4,MAP3K5,SKIL…
GO:BP	regulation of innate immune response	GO:0045088	4.50E-24	23.34716673	449	618	71	17847	UBE2D3,PTPN6,NR1H2,PRKCD,PSMC2,FGG,RAF1,PSMA5,UBA52,UBC,ESR1,SRC,EP300,CREBBP,TRAF6,IKBKG,IKBKE,FYN,UBE2D2,RELA,NFKB1,PRKACA,UBB,PTPN11,PRKDC,SIN3A,RPS27A,STAT1,NFKBIA,CRK,PPARG,SUMO1,LYN,IKBKB,JAK2,SYK,XRCC5,CHUK,DHX9,CASP8,PAK1,PSMC5,VAV1,CAV1,HSPA1A,JAK1,CDC37,ARRB2,PSMA1,PAK2,PSMD4,BTRC,TBK1,PRKCE,XRCC6,PSMD2,BTK,PDPK1,SFPQ,HMGB1,PSMA3,ITCH,MAP3K7,PSMC1,HRAS,PSMD13,PSMC6,PSMA6,PSMC4,FADD,NR1H3
GO:BP	primary metabolic process	GO:0044238	6.69E-24	23.17450069	10527	618	489	17847	RNF220,RORC,SNRPF,CLNS1A,HPDL,LPIN2,CLTA,TMEM119,SERPINA6,PSRC1,ENOPH1,NFE2,GMDS,SEPHS1,AIMP2,PRAMEF6,GK5,UBE2D3,COL2A1,HFE2,PTPN6,STK38,ANKRD1,ATP6AP2,COMP,NR1H2,CDC123,PPIAL4G,CSDA,MYH6,PFKFB4,DUX4,MEPE,PHIP,RAB8A,FHL2,NIPBL,EXOSC1,NBL1,SIRT2,PAMR1,PRKCD,TSLP,AMZ2,NR4A1,BAG3,SNRPN,TRIB1,MRPL14,PSMC2,PLA2G2A,PRAMEF10,ZMYM6,MYOCD,TXN,ADIPOR2,MEN1,DCAF7,HFE,RPUSD1,MRPS11,TIAM2,ACACA,RFC4,GCAT,TOP2…
GO:BP	growth	GO:0040007	9.87E-24	23.00559668	1009	618	109	17847	PSRC1,MT1G,COMP,CSDA,MYH6,NIPBL,MYL2,MYOCD,ADIPOR2,MT2A,TGFB3,RXRA,SGK1,WNT7A,CDKN2A,MYOZ1,VEGFA,TP53,ESR1,SRC,EP300,AR,EGFR,SMAD3,SMAD2,CSNK2A1,CTNNB1,MAPK1,ABL1,AKT1,RB1,SMAD4,STAT3,RARA,PTPN11,PRKDC,SHC1,SIN3A,PML,SMARCA4,TGFBR1,PPP2CA,RUVBL2,PPP2R1A,GSK3B,PPARG,MAPK14,CDK1,ERBB2,PIN1,CDKN1A,HIF1A,PRKCZ,SIRT1,APP,HTATIP,SFN,SMURF1,ESR2,ATM,TRIM28,CDC42,RBBP7,PAK1,CREB1,HSP90AA1,HSPA1A,MYOD1,CD…
GO:BP	regulation of response to biotic stimulus	GO:0002831	1.07E-23	22.97160562	520	618	76	17847	UBE2D3,PTPN6,NR1H2,SIRT2,PRKCD,TRIB1,PSMC2,FGG,RAF1,PSMA5,UBA52,UBC,ESR1,SRC,EP300,CREBBP,TRAF6,IKBKG,IKBKE,FYN,UBE2D2,PRKCA,RELA,NFKB1,PRKACA,UBB,MAPK3,PTPN11,PRKDC,SIN3A,RPS27A,STAT1,NFKBIA,CRK,PPARG,SUMO1,LYN,IKBKB,JAK2,SYK,XRCC5,CHUK,DHX9,CASP8,PAK1,PSMC5,VAV1,CAV1,HSPA1A,JAK1,CDC37,ARRB2,PSMA1,PAK2,PSMD4,BTRC,TBK1,PRKCE,XRCC6,PSMD2,BTK,PDPK1,SFPQ,HMGB1,PSMA3,ITCH,MAP3K7,PSMC1,HRAS,PSMD13,PSM…
GO:BP	Fc receptor signaling pathway	GO:0038093	1.21E-23	22.91900689	239	618	52	17847	PRKCD,PSMC2,FOS,PSMA5,GRB2,SRC,TRAF6,JUN,IKBKG,MAPK1,PIK3R1,FYN,ABL1,ACTB,RELA,NFKB1,MAPK3,PLCG1,SHC1,CRK,LYN,IKBKB,NCK1,SYK,CHUK,MAPK8,CDC42,PAK1,ACTG1,PSMC5,VAV1,HSP90AA1,PSMA1,PAK2,PSMD4,BTRC,PRKCE,PSMD2,BTK,PDPK1,PSMA3,SOS1,GAB2,MAP3K7,PSMC1,KIT,PSMD13,PTPRC,PSMC6,PSMA6,PIK3CA,PSMC4
GO:BP	regulation of protein localization	GO:0032880	1.41E-23	22.85049479	1046	618	111	17847	UBE2D3,ANKRD1,CEP250,RAB8A,NIPBL,PPFIA1,PRKCD,TSLP,BAG3,TXN,MYOM1,HFE,TGFB3,FGG,PANX3,MAGED1,WNT7A,TPR,TP53,YWHAZ,SRC,TRAF6,AR,EGFR,SMAD3,YWHAG,CTNNB1,MAPK1,PIK3R1,FYN,MDM2,ABL1,AKT1,RB1,PRKCA,ACTB,PRKACA,MAPK3,PTPN11,YWHAQ,YWHAB,SIN3A,HDAC3,PARP1,PML,HSPA8,YWHAE,GSK3B,SUMO1,LYN,MAPK14,JAK2,FLNA,CDK1,SYK,ERBB2,PIN1,EPB41,HIF1A,PRKCZ,PLK1,CSNK2A2,IRS1,CHUK,DHX9,SFN,TERF1,MAPK8,CASP8,TRIM28,CDC42,P…
GO:BP	protein catabolic process	GO:0030163	2.65E-23	22.57743135	956	618	105	17847	CLTA,UBE2D3,SIRT2,BAG3,TRIB1,PSMC2,HFE,KLK4,UCHL3,TMUB1,UBA1,CLN5,FBXL20,CDKN2A,PSMA5,UBA52,UBC,EGFR,SMAD3,CSNK2A1,CTNNB1,FYN,MDM2,AKT1,UBE2D2,RELA,UBE2I,PRKACA,UBB,CBL,RPS27A,PML,HSPA8,GSK3B,EEF1A1,SUMO1,SUMO2,FLNA,CDK1,PIN1,PLK1,SIRT1,CSNK2A2,STUB1,HTATIP,SMURF1,ATM,CASP8,APC,HGS,SMURF2,PSMC5,CAV1,HSP90AA1,HSPA5,HSPA1A,CDH1,XPO1,ARRB1,CEBPA,ARRB2,NEDD4,SQSTM1,DDB1,TNFRSF1B,PARK2,PTK2B,PSMA1,PSM…
GO:BP	regulation of apoptotic signaling pathway	GO:2001233	2.77E-23	22.55723437	412	618	67	17847	COL2A1,CSDA,PHIP,PRKCD,AATF,FGG,RAF1,MAGED1,MIR210,TP53,YWHAZ,SRC,HDAC1,AR,SMAD3,BRCA1,CSNK2A1,YWHAG,CTNNB1,FYN,MDM2,AKT1,RB1,RELA,UBB,LCK,YWHAQ,YWHAB,PARP1,PML,TGFBR1,YWHAE,PPP2R1A,GSK3B,NCK1,JAK2,HIF1A,SIRT1,CSNK2A2,SFN,MAPK8,CASP8,CAV1,E2F1,HSPA1A,YWHAH,BCL2,PPP1CA,ARRB2,PARK2,PAK2,SKIL,SFPQ,TAF9,FASLG,SIAH1,HSPB1,PSEN1,ATF3,PPP2R1B,PTPRC,FAS,LMNA,BMPR1B,CFLAR,HTT,FADD
GO:BP	cellular response to transforming growth factor beta stimulus	GO:0071560	2.80E-23	22.55328643	243	618	52	17847	ANKRD1,MYOCD,MEN1,TGFB3,CLDN5,FOLR1,FOS,SOX11,WNT7A,UBA52,UBC,TP53,SRC,EP300,CREBBP,SMAD3,JUN,SMAD2,FYN,NR3C1,HDAC2,SMAD4,UBB,CBL,RPS27A,PARP1,PML,TGFBR1,CRK,SMAD1,PIN1,PRKCZ,SIRT1,STUB1,SMURF1,SMURF2,CREB1,CAV1,HSPA5,HSPA1A,ARRB2,SKIL,PDPK1,SMAD9,DNM2,MAP3K7,PPARGC1A,RHOA,TGFBR2,STRAP,DAB2,CFLAR
GO:BP	positive regulation of transferase activity	GO:0051347	4.17E-23	22.37987733	656	618	85	17847	PSRC1,PRKCD,TXN,RFC4,TGFB3,RAF1,MAGED1,UBA52,VEGFA,UBC,SRC,TRAF6,MYC,EGFR,IKBKG,CTNNB1,MAPK1,FYN,ABL1,AKT1,UBE2I,PRKACA,UBB,MAPK3,PTPN11,SHC1,RPS27A,TGFBR1,PPP2CA,CRK,LYN,MAPK14,JAK2,CDK1,DAXX,SYK,ERBB2,PIN1,CDKN1A,PRKCZ,PLK1,SIRT1,XRCC5,MAP3K14,IRS1,STUB1,CDC42,PAK1,HSP90AA1,ARRB1,CCND1,INSR,PTK2B,PAK2,XRCC6,TNIK,MAPT,GH1,ILK,MAP3K5,PDGFRB,PDPK1,CSK,MAP2K1,DLG4,DVL2,TCP1,MAP3K7,TAL1,HRAS,STK24,K…
GO:BP	activation of innate immune response	GO:0002218	5.69E-23	22.24520868	322	618	59	17847	UBE2D3,PRKCD,PSMC2,FGG,RAF1,PSMA5,UBA52,UBC,ESR1,SRC,EP300,CREBBP,TRAF6,IKBKG,IKBKE,FYN,UBE2D2,RELA,NFKB1,PRKACA,UBB,PRKDC,SIN3A,RPS27A,NFKBIA,LYN,IKBKB,SYK,XRCC5,CHUK,CASP8,PAK1,PSMC5,CAV1,HSPA1A,ARRB2,PSMA1,PAK2,PSMD4,BTRC,TBK1,PRKCE,XRCC6,PSMD2,BTK,PDPK1,SFPQ,HMGB1,PSMA3,ITCH,MAP3K7,PSMC1,HRAS,PSMD13,PSMC6,PSMA6,PSMC4,FADD,NR1H3
GO:BP	metabolic process	GO:0008152	8.12E-23	22.09053355	11612	618	518	17847	RNF220,RORC,SNRPF,CLNS1A,HPDL,TPCN1,LPIN2,CLTA,TMEM119,SERPINA6,TMEM14C,PSRC1,ENOPH1,NFE2,GMDS,SEPHS1,AIMP2,PRAMEF6,GK5,UBE2D3,COL2A1,HFE2,PTPN6,STK38,ANKRD1,ATP6AP2,COMP,NR1H2,CDC123,RUFY4,PPIAL4G,CSDA,MYH6,PFKFB4,DUX4,MEPE,MFAP2,ATP6V1B2,PHIP,RAB8A,FHL2,NIPBL,EXOSC1,NBL1,SIRT2,PAMR1,PRKCD,TSLP,AMZ2,NR4A1,FOXRED1,BAG3,SNRPN,TRIB1,MRPL14,PSMC2,PLA2G2A,PRAMEF10,CD320,ZMYM6,MYOCD,TXN,MYOM1,ADIPOR2,…
GO:BP	response to transforming growth factor beta	GO:0071559	9.57E-23	22.01916606	249	618	52	17847	ANKRD1,MYOCD,MEN1,TGFB3,CLDN5,FOLR1,FOS,SOX11,WNT7A,UBA52,UBC,TP53,SRC,EP300,CREBBP,SMAD3,JUN,SMAD2,FYN,NR3C1,HDAC2,SMAD4,UBB,CBL,RPS27A,PARP1,PML,TGFBR1,CRK,SMAD1,PIN1,PRKCZ,SIRT1,STUB1,SMURF1,SMURF2,CREB1,CAV1,HSPA5,HSPA1A,ARRB2,SKIL,PDPK1,SMAD9,DNM2,MAP3K7,PPARGC1A,RHOA,TGFBR2,STRAP,DAB2,CFLAR
GO:BP	cellular response to oxygen levels	GO:0071453	1.01E-22	21.9977049	239	618	51	17847	ANKRD1,SIRT2,PSMC2,EPAS1,MIR210,PSMA5,UBA52,VEGFA,UBC,TP53,SRC,EP300,CREBBP,MYC,MDM2,AKT1,UBB,VHL,CBL,RPS27A,PPARG,POLR2A,HIF1A,SIRT1,STUB1,PSMC5,CAV1,E2F1,MYOD1,BCL2,PSMA1,PSMD4,PRKCE,NDRG1,PSMD2,NOTCH1,PHB2,PSMA3,PSMC1,SUV39H1,ATF4,PSMD13,PPARGC1A,MDM4,PSMC6,PSMA6,FAS,LMNA,PSMC4,CCNB1,CFLAR
GO:BP	negative regulation of cell cycle	GO:0045786	1.32E-22	21.88009351	638	618	83	17847	CDC123,DUX4,NR4A1,PSMC2,MYOCD,MEN1,TOP2A,RPS6KA2,SOX11,CDKN2A,CDK2AP2,TPR,PSMA5,CTDSP2,TP53,EP300,MYC,EGFR,SMAD3,BRCA1,CTNNB1,MDM2,ABL1,RB1,PRKACA,PCNA,PTPN11,PRKDC,PML,TGFBR1,H2AFX,NPM1,MAPK14,CDK1,CDKN1A,PLK1,PRKAB1,RBBP4,SFN,TERF1,CDK9,ATM,RBBP7,APC,PSMC5,TERF2,E2F1,CDK4,BCL2,CEBPA,CCND1,ATR,PSMA1,CHEK1,PSMD4,CDC5L,RBL1,ATF2,ILK,SKIL,PSMD2,TSG101,NOTCH1,MAP2K1,PSMA3,RPA2,KAT2B,MAX,PSMC1,HRAS,C…
GO:BP	cellular response to peptide hormone stimulus	GO:0071375	1.32E-22	21.87918424	327	618	59	17847	LPIN2,ATP6V1B2,PHIP,RAB8A,PRKCD,NR4A1,MEN1,GRB2,SRC,YWHAG,PIK3R1,FYN,MDM2,AKT1,RELA,SP1,NFKB1,STAT3,PRKACA,PTPN11,PRKDC,SHC1,PARP1,STAT1,CRK,GSK3B,PPARG,LYN,NCK1,JAK2,PRKCZ,SIRT1,IRS1,PAK1,APC,CREB1,CAV1,HDAC5,CDK4,PRKCB,STAT5A,INSR,CDC5L,SMARCC1,GH1,RPS6KB1,STAT5B,IGF1R,PDPK1,CSK,SOS1,KAT2B,MAX,IRS2,BCAR1,PIK3CA,GRB10,CFLAR,JAK3
GO:BP	organic substance metabolic process	GO:0071704	1.38E-22	21.85931358	11036	618	501	17847	RNF220,RORC,SNRPF,CLNS1A,HPDL,LPIN2,CLTA,TMEM119,SERPINA6,TMEM14C,PSRC1,ENOPH1,NFE2,GMDS,SEPHS1,AIMP2,PRAMEF6,GK5,UBE2D3,COL2A1,HFE2,PTPN6,STK38,ANKRD1,ATP6AP2,COMP,NR1H2,CDC123,PPIAL4G,CSDA,MYH6,PFKFB4,DUX4,MEPE,PHIP,RAB8A,FHL2,NIPBL,EXOSC1,NBL1,SIRT2,PAMR1,PRKCD,TSLP,AMZ2,NR4A1,BAG3,SNRPN,TRIB1,MRPL14,PSMC2,PLA2G2A,PRAMEF10,CD320,ZMYM6,MYOCD,TXN,MYOM1,ADIPOR2,MIR99A,MEN1,DCAF7,HFE,RPUSD1,MRPS11…
GO:BP	rhythmic process	GO:0048511	2.12E-22	21.67322966	296	618	56	17847	RORC,TOP2A,BHLHB3,TGFB3,MAGED1,TP53,ESR1,SRC,EP300,CREBBP,HDAC1,EGFR,JUN,CSNK2A1,SP1,HDAC2,PCNA,PRKDC,NCOR1,SIN3A,HDAC3,PML,NCOR2,NCOA1,GSK3B,PPARG,CDK1,SIRT1,DHX9,MAPK8,NFKB2,CREB1,HSPA5,CDK4,PPP1CA,ARRB1,ARRB2,DDB1,ETS1,NCOA2,BTRC,NRIP1,USP7,NR0B2,SFPQ,KAT2B,SUV39H1,ATF4,PPARA,JUND,CUL4A,PPARGC1A,CDK5,PRKCG,BMPR1B,NR1H3
GO:BP	regulation of DNA-templated transcription in response to stress	GO:0043620	3.48E-22	21.45822491	126	618	38	17847	SIRT2,BAG3,PSMC2,EPAS1,PSMA5,UBA52,VEGFA,UBC,TP53,EP300,CREBBP,JUN,RELA,UBB,VHL,SIN3A,RPS27A,CEBPB,NCK1,HIF1A,PSMC5,HSPA5,HSPA1A,NEDD4,PSMA1,CHEK1,PSMD4,PSMD2,NOTCH1,PSMA3,PSMC1,ATF4,PSMD13,ATF3,PSMC6,TAF1,PSMA6,PSMC4
GO:BP	cellular response to peptide	GO:1901653	3.75E-22	21.42636431	393	618	64	17847	LPIN2,ATP6V1B2,PHIP,RAB8A,PRKCD,NR4A1,MEN1,TP53,GRB2,SRC,YWHAG,PIK3R1,FYN,MDM2,AKT1,RELA,SP1,NFKB1,STAT3,PRKACA,PTPN11,PRKDC,SHC1,PARP1,STAT1,CRK,GSK3B,PPARG,LYN,VIM,NCK1,JAK2,PRKCZ,SIRT1,APP,IRS1,PAK1,APC,CREB1,CAV1,HDAC5,CDK4,PRKCB,STAT5A,INSR,CDC5L,SMARCC1,GH1,RPS6KB1,STAT5B,IGF1R,PDPK1,CSK,SOS1,KAT2B,MAX,IRS2,PSEN1,CDK5,BCAR1,PIK3CA,GRB10,CFLAR,JAK3
GO:BP	immune response-regulating signaling pathway	GO:0002764	4.22E-22	21.37478096	678	618	85	17847	UBE2D3,PTPN6,PRKCD,PSMC2,FGG,FOS,RUNX1,RAF1,PSMA5,UBA52,UBC,ESR1,GRB2,SRC,EP300,CREBBP,TRAF6,JUN,IKBKG,MAPK1,IKBKE,PIK3R1,FYN,ABL1,UBE2D2,ACTB,RELA,NFKB1,PRKACA,UBB,MAPK3,PLCG1,LCK,SHC1,RPS27A,NFKBIA,CRK,LYN,IKBKB,NCK1,SYK,CHUK,MAPK8,CASP8,CDC42,PAK1,ACTG1,PSMC5,VAV1,CAV1,HSP90AA1,HSPA1A,BCL2,ARRB2,PRKCB,PSMA1,PAK2,PSMD4,BTRC,TBK1,PRKCE,PSMD2,BTK,PDPK1,CSK,HMGB1,PSMA3,ZAP70,SOS1,GAB2,ITCH,MAP3K7,…
GO:BP	peptidyl-serine phosphorylation	GO:0018105	4.29E-22	21.36765388	300	618	56	17847	STK38,PRKCD,TXN,NEK6,RPS6KA2,RAF1,SGK1,VEGFA,SRC,EGFR,CSNK2A1,MAPK1,IKBKE,AKT1,PRKCA,PRKACA,MAPK3,PRKDC,TGFBR1,GSK3B,IKBKB,NCK1,MAPK14,CDK1,SYK,PRKCZ,PLK1,CSNK2A2,APP,CHUK,ATM,MAPK8,PAK1,CAV1,HSP90AA1,BCL2,ARRB1,ARRB2,PRKCB,ATR,PAK2,TBK1,PRKCE,RPS6KB1,HDAC6,ILK,PDPK1,AKAP9,CDK5,TGFBR2,PRKCG,AXIN1,TAF1,PIK3CA,CCNB1,ADRBK1
GO:BP	cell cycle phase transition	GO:0044770	5.53E-22	21.25760957	637	618	82	17847	PTPN6,CEP250,SIRT2,PSMC2,CKAP5,MEN1,NEK6,CDKN2A,CDK2AP2,TPR,PSMA5,CTDSP2,NSMCE2,TP53,EP300,MYC,EGFR,BRCA1,YWHAG,MDM2,AKT1,RB1,PRKACA,PCNA,PRKDC,SIN3A,PML,YWHAE,NPM1,PPP2R1A,MCM7,TUBB,CDK1,CDKN1A,PLK1,APP,MCM3,SFN,ATM,APC,PSMC5,HSP90AA1,E2F1,CDK4,BCL2,MCM2,CCND1,DDB1,DNCL1,PSMA1,CHEK1,PSMD4,BTRC,RBL1,RPS6KB1,DCTN1,MCM5,PSMD2,MCM6,PHB2,KHDRBS1,PSMA3,RPA2,DNM2,MAX,PSMC1,AKAP9,MAPRE1,ITGB1,CUL4A,PSMD…
GO:BP	positive regulation of catalytic activity	GO:0043085	6.22E-22	21.2063735	1427	618	130	17847	PSRC1,AIMP2,NR1H2,PRKCD,PLXNB1,TXN,TIAM2,COX17,RFC4,TGFB3,RAF1,MAGED1,CDKN2A,UBA52,VEGFA,UBC,ESR1,SRC,TRAF6,MYC,EGFR,SMAD3,JUN,IKBKG,CTNNB1,MAPK1,FYN,ABL1,AKT1,UBE2I,STAT3,PRKACA,UBB,PCNA,MAPK3,PTPN11,PLCG1,LCK,SHC1,YWHAB,RPS27A,PML,TGFBR1,PPP2CA,CRK,GSK3B,PPARG,LYN,MAPK14,JAK2,CDK1,DAXX,SYK,ERBB2,PIN1,CDKN1A,HIF1A,PRKCZ,PLK1,SIRT1,XRCC5,VDR,MAP3K14,APP,IRS1,DHX9,STUB1,MAPK8,CASP8,CDC42,PAK1,VAV1…
GO:BP	regulation of transcription from RNA polymerase II promoter in response to stress	GO:0043618	6.30E-22	21.20038207	120	618	37	17847	SIRT2,BAG3,PSMC2,EPAS1,PSMA5,UBA52,VEGFA,UBC,TP53,EP300,CREBBP,JUN,UBB,VHL,SIN3A,RPS27A,CEBPB,NCK1,HIF1A,PSMC5,HSPA5,HSPA1A,NEDD4,PSMA1,CHEK1,PSMD4,PSMD2,NOTCH1,PSMA3,PSMC1,ATF4,PSMD13,ATF3,PSMC6,TAF1,PSMA6,PSMC4
GO:BP	regulation of MAPK cascade	GO:0043408	6.38E-22	21.1951871	772	618	91	17847	PTPN6,STK38,ATP6AP2,PRKCD,TRIB1,PLA2G2A,MEN1,TGFB3,FGG,RAF1,MAGED1,WNT7A,UBA52,VEGFA,UBC,GRB2,SRC,TRAF6,MYC,AR,EGFR,JUN,IKBKG,CTNNB1,MAPK1,ABL1,AKT1,PRKCA,SMAD4,UBB,MAPK3,PTPN11,NCOR1,SHC1,RPS27A,HDAC3,TGFBR1,PPP2CA,CRK,PPP2R1A,LYN,MAPK14,JAK2,CDK1,DAXX,SYK,ERBB2,PIN1,PRKCZ,MAP3K14,APP,CDC42,PAK1,HGS,CAV1,COPS5,ARRB1,FN1,ARRB2,INSR,PARK2,PTK2B,PRKCE,TNIK,GH1,ILK,MAP3K5,TSG101,IGF1R,NOTCH1,PDGFRB,…
GO:BP	macromolecule catabolic process	GO:0009057	8.08E-22	21.09253498	1431	618	130	17847	CLTA,UBE2D3,CSDA,EXOSC1,SIRT2,PRKCD,BAG3,TRIB1,PSMC2,HFE,VCAN,KLK4,UCHL3,RPS26,TMUB1,UBA1,CLN5,FBXL20,CDKN2A,PSMA5,UBA52,UBC,YWHAZ,EGFR,SMAD3,CSNK2A1,CTNNB1,FYN,MDM2,AKT1,UBE2D2,PRKCA,RELA,UBE2I,PRKACA,UBB,CBL,YWHAB,RPS27A,PML,HSPA8,PPP2CA,NPM1,PPP2R1A,GSK3B,EEF1A1,SUMO1,VIM,SUMO2,MAPK14,FLNA,CDK1,PIN1,PLK1,SIRT1,CSNK2A2,DHX9,STUB1,HTATIP,RNPS1,SMURF1,ATM,CASP8,APC,HGS,SMURF2,PSMC5,CAV1,HSP90AA1,…
GO:BP	positive regulation of transport	GO:0051050	8.71E-22	21.06000428	998	618	105	17847	UBE2D3,ANKRD1,NR1H2,PRKCD,TSLP,BAG3,MYOM1,ADIPOR2,HFE,COX17,TGFB3,APLNR,FGG,PANX3,SOX11,ATP2A1,SGK1,MIR210,TPR,VEGFA,TP53,YWHAZ,SRC,EGFR,SMAD3,YWHAG,MAPK1,PIK3R1,FYN,MDM2,ABL1,AKT1,ACTB,SMAD4,PRKACA,MAPK3,PTPN11,PLCG1,CBL,YWHAQ,YWHAB,HDAC3,YWHAE,NFKBIA,GSK3B,PPARG,CEBPB,SUMO1,MAPK14,JAK2,FLNA,SYK,ERBB2,HIF1A,PRKCZ,SIRT1,CSNK2A2,IRS1,CHUK,DHX9,SFN,MAPK8,CASP8,TRIM28,CDC42,PAK1,HGS,ARF6,CREB1,CAV1,…
GO:BP	regulation of growth	GO:0040008	1.29E-21	20.88919588	689	618	85	17847	PSRC1,MT1G,CSDA,MYH6,NIPBL,MYL2,MYOCD,ADIPOR2,MT2A,SGK1,CDKN2A,MYOZ1,VEGFA,TP53,AR,EGFR,SMAD3,CSNK2A1,MAPK1,ABL1,AKT1,RB1,SMAD4,STAT3,PRKDC,SHC1,SIN3A,PML,SMARCA4,TGFBR1,PPP2CA,RUVBL2,PPP2R1A,GSK3B,PPARG,MAPK14,CDK1,ERBB2,PIN1,CDKN1A,HIF1A,SIRT1,APP,HTATIP,SFN,SMURF1,ESR2,CDC42,RBBP7,PAK1,CREB1,HSPA1A,MYOD1,CDK4,BCL2,FN1,STAT5A,INSR,PARK2,YY1,PTK2B,PAK2,DISC1,MAPT,GH1,SRF,ILK,STAT5B,ING1,TSG101,N…
GO:BP	transcription initiation from RNA polymerase II promoter	GO:0006367	1.55E-21	20.81056995	202	618	46	17847	RORC,NR1H2,NR4A1,PSMC2,RXRA,GTF2E2,RUNX2,TP53,ESR1,CREBBP,AR,NR3C1,RARA,TBP,PPARG,POLR2A,CDK1,CDKN1A,VDR,CDK9,ESR2,THRB,TRIM28,PSMC5,CREB1,THRA,CDK4,CCND1,SRF,GTF2B,NR0B2,NOTCH1,HMGB1,TAF9,KAT2B,RXRB,GTF2F1,PPARA,PPARGC1A,PSMC6,TAF1,PSMC4,CDK7,CCNB1,GTF2F2,NR1H3
GO:BP	DNA-templated transcription, initiation	GO:0006352	1.76E-21	20.754294	264	618	52	17847	RORC,NR1H2,NR4A1,PSMC2,RXRA,GTF2E2,RUNX2,TP53,ESR1,CREBBP,AR,JUN,CTNNB1,NR3C1,RARA,MAPK3,SMARCA4,TBP,PPARG,POLR2A,CDK1,CDKN1A,NCOA6,VDR,CDK9,ESR2,THRB,TRIM28,PSMC5,CREB1,THRA,CDK4,CCND1,SRF,GTF2B,NR0B2,NOTCH1,HMGB1,TAF9,KAT2B,RXRB,GTF2F1,SMARCB1,PPARA,PPARGC1A,PSMC6,TAF1,PSMC4,CDK7,CCNB1,GTF2F2,NR1H3
GO:BP	response to drug	GO:0042493	1.81E-21	20.74215815	1074	618	109	17847	SLC13A5,PRKCD,RYR1,CD320,TXN,MT2A,TGFB3,SLC25A22,CLDN5,FOLR1,SLC36A2,CHRNA4,HBG1,ASNS,IRF5,MB,FOS,DAD1,TP53,SRC,MYC,EGFR,JUN,BRCA1,CTNNB1,MAPK1,FYN,MDM2,ABL1,NR3C1,ACTB,RELA,HDAC2,NFKB1,STAT3,RARA,PCNA,MAPK3,PTPN11,LCK,CBL,SIN3A,STAT1,NFKBIA,CRK,NCOA1,GSK3B,PPARG,MCM7,LYN,VIM,HDAC4,MAPK14,FLNA,CDK1,DAXX,CDKN1A,SIRT1,XRCC5,CHUK,TERF1,CDK9,CASP8,CREB1,CAV1,HSPA5,HDAC5,CDK4,CDH1,BCL2,XPO1,ARRB1,ARRB…
GO:BP	intracellular steroid hormone receptor signaling pathway	GO:0030518	2.31E-21	20.63717708	132	618	38	17847	FHL2,RUNX1,ESR1,SRC,EP300,HDAC1,AR,BRCA1,CTNNB1,NR3C1,RB1,NCOR1,PARP1,SMARCA4,NCOR2,NCOA1,NCOA3,JAK2,DAXX,SIRT1,HTATIP,ESR2,PAK1,YWHAH,ARRB2,NEDD4,NRIP1,HDAC6,PHB2,STRN3,PHB,PPARGC1A,CARM1,RHOA,AXIN1,DDX17,DAB2,CDK7
GO:BP	positive regulation of kinase activity	GO:0033674	2.32E-21	20.63514405	579	618	77	17847	PSRC1,PRKCD,TXN,TGFB3,RAF1,MAGED1,UBA52,VEGFA,UBC,SRC,TRAF6,EGFR,IKBKG,MAPK1,FYN,ABL1,AKT1,PRKACA,UBB,MAPK3,PTPN11,SHC1,RPS27A,TGFBR1,PPP2CA,CRK,LYN,MAPK14,JAK2,CDK1,DAXX,SYK,ERBB2,CDKN1A,PRKCZ,SIRT1,XRCC5,MAP3K14,IRS1,CDC42,PAK1,HSP90AA1,ARRB1,CCND1,INSR,PTK2B,PAK2,XRCC6,TNIK,MAPT,GH1,ILK,MAP3K5,PDGFRB,PDPK1,CSK,MAP2K1,DLG4,DVL2,MAP3K7,TAL1,HRAS,STK24,KIT,UNC119,PSEN1,CDK5,RHOA,TGFBR2,IQGAP1,GAD…
GO:BP	regulation of defense response	GO:0031347	2.70E-21	20.56838735	803	618	92	17847	UBE2D3,PTPN6,NR1H2,SIGLEC10,SIRT2,PRKCD,TSLP,IL17B,PSMC2,PLA2G2A,FGG,RAF1,PSMA5,UBA52,UBC,ESR1,SRC,EP300,CREBBP,TRAF6,EGFR,SMAD3,IKBKG,IKBKE,FYN,UBE2D2,RB1,RELA,NFKB1,PRKACA,UBB,MAPK3,PTPN11,PRKDC,SIN3A,RPS27A,STAT1,NFKBIA,CRK,PPARG,CEBPB,SUMO1,TNFRSF1A,LYN,IKBKB,MAPK14,JAK2,SYK,XRCC5,CHUK,DHX9,ATM,CASP8,PAK1,PSMC5,VAV1,CAV1,HSPA1A,JAK1,CEBPA,FANCA,CDC37,ARRB2,ETS1,TNFRSF1B,BCR,PSMA1,PAK2,PSMD4,B…
GO:BP	response to biotic stimulus	GO:0009607	2.76E-21	20.5592737	1561	618	136	17847	UBE2D3,PTPN6,ANKRD1,NR1H2,SIGLEC10,SIRT2,PRKCD,TRIB1,PSMC2,PLA2G2A,IFI44L,MT2A,FLNB,IRF5,FGG,FOS,RAF1,PSMA5,UBA52,UBC,TP53,ESR1,SRC,EP300,CREBBP,TRAF6,SMAD3,JUN,IKBKG,MAPK1,IKBKE,FYN,ABL1,AKT1,UBE2D2,PRKCA,RELA,HDAC2,NFKB1,PRKACA,UBB,RARA,MAPK3,PTPN11,PRKDC,SHC1,SIN3A,RPS27A,PML,STAT1,NFKBIA,CRK,GSK3B,PPARG,CEBPB,SUMO1,TNFRSF1A,LYN,IKBKB,VIM,TUBB,NCK1,MAPK14,JAK2,FLNA,SYK,XRCC5,VDR,MAP3K14,APP,CH…
GO:BP	mitotic cell cycle phase transition	GO:0044772	2.84E-21	20.54595522	595	618	78	17847	PTPN6,CEP250,SIRT2,PSMC2,CKAP5,NEK6,CDKN2A,CDK2AP2,TPR,PSMA5,CTDSP2,NSMCE2,TP53,EP300,MYC,EGFR,BRCA1,YWHAG,MDM2,AKT1,RB1,PRKACA,PCNA,PRKDC,SIN3A,PML,YWHAE,PPP2R1A,MCM7,TUBB,CDK1,CDKN1A,PLK1,APP,MCM3,SFN,ATM,APC,PSMC5,HSP90AA1,E2F1,CDK4,BCL2,MCM2,CCND1,DDB1,DNCL1,PSMA1,CHEK1,PSMD4,BTRC,RBL1,RPS6KB1,DCTN1,MCM5,PSMD2,MCM6,PHB2,KHDRBS1,PSMA3,RPA2,DNM2,MAX,PSMC1,AKAP9,MAPRE1,ITGB1,CUL4A,PSMD13,CARM1,T…
GO:BP	peptidyl-serine modification	GO:0018209	3.02E-21	20.51994758	323	618	57	17847	STK38,PRKCD,TXN,NEK6,RPS6KA2,RAF1,SGK1,VEGFA,SRC,EGFR,CSNK2A1,MAPK1,IKBKE,AKT1,PRKCA,PRKACA,MAPK3,PRKDC,PARP1,TGFBR1,GSK3B,IKBKB,NCK1,MAPK14,CDK1,SYK,PRKCZ,PLK1,CSNK2A2,APP,CHUK,ATM,MAPK8,PAK1,CAV1,HSP90AA1,BCL2,ARRB1,ARRB2,PRKCB,ATR,PAK2,TBK1,PRKCE,RPS6KB1,HDAC6,ILK,PDPK1,AKAP9,CDK5,TGFBR2,PRKCG,AXIN1,TAF1,PIK3CA,CCNB1,ADRBK1
GO:BP	positive regulation of response to biotic stimulus	GO:0002833	3.40E-21	20.46825319	396	618	63	17847	UBE2D3,PRKCD,PSMC2,FGG,RAF1,PSMA5,UBA52,UBC,ESR1,SRC,EP300,CREBBP,TRAF6,IKBKG,IKBKE,FYN,UBE2D2,PRKCA,RELA,NFKB1,PRKACA,UBB,MAPK3,PRKDC,SIN3A,RPS27A,NFKBIA,LYN,IKBKB,SYK,XRCC5,CHUK,DHX9,CASP8,PAK1,PSMC5,VAV1,CAV1,HSPA1A,ARRB2,PSMA1,PAK2,PSMD4,BTRC,TBK1,PRKCE,XRCC6,PSMD2,BTK,PDPK1,SFPQ,HMGB1,PSMA3,ITCH,MAP3K7,PSMC1,HRAS,PSMD13,PSMC6,PSMA6,PSMC4,FADD,NR1H3
GO:BP	positive regulation of response to external stimulus	GO:0032103	3.48E-21	20.45896002	640	618	81	17847	UBE2D3,PRKCD,TSLP,IL17B,PSMC2,PLA2G2A,TUBB2B,FGG,RAF1,PSMA5,UBA52,VEGFA,UBC,ESR1,SRC,EP300,CREBBP,TRAF6,EGFR,SMAD3,IKBKG,IKBKE,FYN,UBE2D2,PRKCA,RELA,NFKB1,PRKACA,UBB,MAPK3,PRKDC,SIN3A,RPS27A,NFKBIA,CEBPB,TNFRSF1A,LYN,IKBKB,MAPK14,JAK2,SYK,XRCC5,CHUK,DHX9,CASP8,PAK1,PSMC5,VAV1,CAV1,HSPA1A,CEBPA,ARRB2,ETS1,PTK2B,PSMA1,PAK2,PSMD4,BTRC,TBK1,PRKCE,XRCC6,PSMD2,BTK,PDGFRB,PDPK1,SFPQ,HMGB1,PSMA3,ITCH,MAP…
GO:BP	positive regulation of cellular protein localization	GO:1903829	4.90E-21	20.31021139	326	618	57	17847	UBE2D3,CEP250,NIPBL,PRKCD,BAG3,TPR,TP53,YWHAZ,SRC,EGFR,SMAD3,YWHAG,MAPK1,PIK3R1,FYN,MDM2,AKT1,PRKACA,YWHAQ,YWHAB,HDAC3,PARP1,YWHAE,GSK3B,MAPK14,FLNA,CDK1,ERBB2,EPB41,PLK1,CSNK2A2,SFN,MAPK8,CASP8,TRIM28,CDC42,PAK1,APC,ARF6,E2F1,YWHAH,CDH1,BCL2,SQSTM1,PARK2,PRKCE,MAPT,TSG101,PDPK1,TCP1,HRAS,ITGB1,PSEN1,CDK5,CCT5,IQGAP1,ERBB4
GO:BP	regulation of response to external stimulus	GO:0032101	5.18E-21	20.28540574	1122	618	111	17847	UBE2D3,PTPN6,NR1H2,SIGLEC10,NBL1,SIRT2,PRKCD,TSLP,TRIB1,IL17B,PSMC2,PLA2G2A,TUBB2B,FGG,RAF1,PSMA5,MYOZ1,UBA52,VEGFA,UBC,ESR1,SRC,EP300,CREBBP,TRAF6,EGFR,SMAD3,IKBKG,IKBKE,FYN,UBE2D2,RB1,PRKCA,RELA,NFKB1,PRKACA,UBB,MAPK3,PTPN11,PRKDC,SIN3A,RPS27A,STAT1,NFKBIA,CRK,PPARG,CEBPB,SUMO1,TNFRSF1A,LYN,IKBKB,MAPK14,JAK2,SYK,CDKN1A,XRCC5,CHUK,DHX9,ATM,CASP8,PAK1,PSMC5,VAV1,CAV1,HSPA1A,MYOD1,JAK1,CEBPA,FANCA…
GO:BP	positive regulation of innate immune response	GO:0045089	7.75E-21	20.11049422	377	618	61	17847	UBE2D3,PRKCD,PSMC2,FGG,RAF1,PSMA5,UBA52,UBC,ESR1,SRC,EP300,CREBBP,TRAF6,IKBKG,IKBKE,FYN,UBE2D2,RELA,NFKB1,PRKACA,UBB,PRKDC,SIN3A,RPS27A,NFKBIA,LYN,IKBKB,SYK,XRCC5,CHUK,DHX9,CASP8,PAK1,PSMC5,VAV1,CAV1,HSPA1A,ARRB2,PSMA1,PAK2,PSMD4,BTRC,TBK1,PRKCE,XRCC6,PSMD2,BTK,PDPK1,SFPQ,HMGB1,PSMA3,ITCH,MAP3K7,PSMC1,HRAS,PSMD13,PSMC6,PSMA6,PSMC4,FADD,NR1H3
GO:BP	cellular localization	GO:0051641	7.85E-21	20.10486739	2974	618	204	17847	SNRPF,ACTR1B,TRAM1,TPCN1,CLTA,SAMM50,PSRC1,JSRP1,UBE2D3,PTPN6,CEP250,NPHP1,RAB8A,NIPBL,PPFIA1,PRKCD,BAG3,RYR1,TXN,CKAP5,HFE,ACACA,APLNR,FOLR1,CHRNA4,RAB1B,FLNB,EFR3A,RPS26,SYNGR1,PIP5K1C,ATP2A1,TM9SF1,RAF1,MAGED1,CLN5,WNT7A,MIR210,FBXL20,RAE1,TPR,KIF1A,KLHL21,UBA52,UBC,TP53,YWHAZ,ESR1,SRC,AR,EGFR,SMAD3,IKBKG,YWHAG,CTNNB1,MAPK1,PIK3R1,FYN,MDM2,ABL1,AKT1,UBE2D2,RB1,ACTB,STAT3,PRKACA,UBB,MAPK3,PTPN1…
GO:BP	positive regulation of protein kinase activity	GO:0045860	8.78E-21	20.05655367	535	618	73	17847	PSRC1,PRKCD,TXN,TGFB3,RAF1,MAGED1,UBA52,VEGFA,UBC,SRC,TRAF6,EGFR,IKBKG,MAPK1,FYN,ABL1,AKT1,PRKACA,UBB,MAPK3,PTPN11,SHC1,RPS27A,TGFBR1,PPP2CA,CRK,MAPK14,JAK2,CDK1,DAXX,SYK,ERBB2,CDKN1A,PRKCZ,SIRT1,XRCC5,MAP3K14,PAK1,HSP90AA1,ARRB1,CCND1,INSR,PTK2B,PAK2,XRCC6,TNIK,GH1,ILK,MAP3K5,PDGFRB,PDPK1,CSK,MAP2K1,DLG4,DVL2,MAP3K7,TAL1,HRAS,STK24,KIT,UNC119,PSEN1,CDK5,RHOA,TGFBR2,IQGAP1,GADD45G,PTPRC,AXIN1,DAZ…
GO:BP	regulation of cell cycle phase transition	GO:1901987	9.16E-21	20.03827961	481	618	69	17847	PTPN6,CEP250,SIRT2,PSMC2,CKAP5,MEN1,NEK6,CDKN2A,CDK2AP2,TPR,PSMA5,CTDSP2,NSMCE2,TP53,EP300,EGFR,BRCA1,YWHAG,MDM2,AKT1,RB1,PRKACA,PCNA,PRKDC,SIN3A,PML,YWHAE,NPM1,PPP2R1A,TUBB,CDK1,CDKN1A,PLK1,APP,SFN,ATM,APC,PSMC5,HSP90AA1,E2F1,CDK4,BCL2,CCND1,DDB1,DNCL1,PSMA1,CHEK1,PSMD4,BTRC,RBL1,DCTN1,PSMD2,PHB2,PSMA3,RPA2,PSMC1,AKAP9,MAPRE1,CUL4A,PSMD13,CARM1,TUBA4A,MDM4,PSMC6,TAF1,BRD7,PSMA6,PSMC4,CCNB1
GO:BP	regulation of protein catabolic process	GO:0042176	1.12E-20	19.94999745	392	618	62	17847	SIRT2,TRIB1,PSMC2,HFE,FBXL20,CDKN2A,EGFR,SMAD3,CSNK2A1,FYN,MDM2,AKT1,RELA,PRKACA,UBB,PML,GSK3B,EEF1A1,SUMO1,SUMO2,FLNA,PIN1,PLK1,CSNK2A2,STUB1,SMURF1,APC,HGS,SMURF2,CAV1,HSP90AA1,HSPA1A,CDH1,XPO1,CEBPA,NEDD4,DDB1,TNFRSF1B,PARK2,PTK2B,BTRC,VCP,SMARCC1,DISC1,USP7,UBQLN4,PSMD2,ANXA2,GABARAPL2,TAF9,ITCH,PSMC1,BARD1,PHB,PSEN1,PRKCG,AXIN1,MDM4,UCHL5,TAF1,DAB2,PSMC4
GO:BP	positive regulation of defense response	GO:0031349	1.31E-20	19.8814223	511	618	71	17847	UBE2D3,PRKCD,TSLP,IL17B,PSMC2,PLA2G2A,FGG,RAF1,PSMA5,UBA52,UBC,ESR1,SRC,EP300,CREBBP,TRAF6,EGFR,IKBKG,IKBKE,FYN,UBE2D2,RELA,NFKB1,PRKACA,UBB,MAPK3,PRKDC,SIN3A,RPS27A,NFKBIA,CEBPB,TNFRSF1A,LYN,IKBKB,JAK2,SYK,XRCC5,CHUK,DHX9,CASP8,PAK1,PSMC5,VAV1,CAV1,HSPA1A,CEBPA,ARRB2,ETS1,PSMA1,PAK2,PSMD4,BTRC,TBK1,PRKCE,XRCC6,PSMD2,BTK,PDPK1,SFPQ,HMGB1,PSMA3,ITCH,MAP3K7,PSMC1,HRAS,PSMD13,PSMC6,PSMA6,PSMC4,FADD,…
GO:BP	transforming growth factor beta receptor signaling pathway	GO:0007179	1.60E-20	19.79489139	193	618	44	17847	MYOCD,MEN1,TGFB3,CLDN5,FOLR1,FOS,SOX11,UBA52,UBC,TP53,SRC,EP300,CREBBP,SMAD3,JUN,SMAD2,SMAD4,UBB,CBL,RPS27A,PARP1,PML,TGFBR1,SMAD1,PIN1,PRKCZ,SIRT1,STUB1,SMURF1,SMURF2,CREB1,CAV1,HSPA5,HSPA1A,ARRB2,SKIL,PDPK1,SMAD9,DNM2,MAP3K7,RHOA,TGFBR2,STRAP,DAB2
GO:BP	response to other organism	GO:0051707	1.84E-20	19.73435722	1536	618	133	17847	UBE2D3,PTPN6,ANKRD1,NR1H2,SIGLEC10,SIRT2,PRKCD,TRIB1,PSMC2,PLA2G2A,IFI44L,MT2A,FLNB,IRF5,FGG,FOS,RAF1,PSMA5,UBA52,UBC,TP53,ESR1,SRC,EP300,CREBBP,TRAF6,SMAD3,JUN,IKBKG,MAPK1,IKBKE,FYN,ABL1,AKT1,UBE2D2,PRKCA,RELA,HDAC2,NFKB1,PRKACA,UBB,RARA,MAPK3,PTPN11,PRKDC,SHC1,SIN3A,RPS27A,PML,STAT1,NFKBIA,CRK,PPARG,CEBPB,SUMO1,TNFRSF1A,LYN,IKBKB,VIM,TUBB,NCK1,MAPK14,JAK2,FLNA,SYK,XRCC5,VDR,MAP3K14,APP,CHUK,DHX…
GO:BP	response to external biotic stimulus	GO:0043207	2.08E-20	19.68167584	1538	618	133	17847	UBE2D3,PTPN6,ANKRD1,NR1H2,SIGLEC10,SIRT2,PRKCD,TRIB1,PSMC2,PLA2G2A,IFI44L,MT2A,FLNB,IRF5,FGG,FOS,RAF1,PSMA5,UBA52,UBC,TP53,ESR1,SRC,EP300,CREBBP,TRAF6,SMAD3,JUN,IKBKG,MAPK1,IKBKE,FYN,ABL1,AKT1,UBE2D2,PRKCA,RELA,HDAC2,NFKB1,PRKACA,UBB,RARA,MAPK3,PTPN11,PRKDC,SHC1,SIN3A,RPS27A,PML,STAT1,NFKBIA,CRK,PPARG,CEBPB,SUMO1,TNFRSF1A,LYN,IKBKB,VIM,TUBB,NCK1,MAPK14,JAK2,FLNA,SYK,XRCC5,VDR,MAP3K14,APP,CHUK,DHX…
GO:BP	chromatin organization	GO:0006325	2.23E-20	19.65103873	811	618	91	17847	ACTR6,NFE2,NIPBL,SIRT2,PRKCD,MYOCD,CENPN,MEN1,H2AFZ,CDKN2A,TSPY2,TPR,VEGFA,TP53,ESR1,EP300,CREBBP,HDAC1,MYC,BRCA1,CTNNB1,NR3C1,RB1,PRKCA,ACTB,RELA,HDAC2,SMAD4,MAPK3,NCOR1,SIN3A,HDAC3,SMARCA4,H2AFX,NPM1,NCOA1,NCOA3,RUVBL2,HDAC4,JAK2,CDK1,DAXX,SIRT1,RBBP4,RIF1,HTATIP,CDK9,ATM,MAPK8,TRIM28,RBBP7,PAK1,HDAC5,MYOD1,ARRB1,CHD3,MCM2,SET,DDB1,PRKCB,CHEK1,SMARCC1,RBL1,ATF2,HDAC6,SETDB1,USP7,GTF2B,CHAF1A,MY…
GO:BP	neuron death	GO:0070997	2.31E-20	19.63586713	360	618	59	17847	AIMP2,TGFB3,FOS,TP53,JUN,IKBKG,CTNNB1,FYN,ABL1,AKT1,RB1,STAT3,UBB,CBL,PARP1,GSK3B,CEBPB,HDAC4,JAK2,DAXX,PIN1,HIF1A,SIRT1,APP,ATM,CASP8,THRB,CDC42,CREB1,HSPA5,BCL2,ARRB1,ARRB2,SET,TNFRSF1B,ATN1,PARK2,PTK2B,TBK1,MAPT,ATF2,ILK,MAP3K5,MYB,PDPK1,FASLG,MAX,PSMC1,SIAH1,ATF4,HRAS,PPARA,PSEN1,PPARGC1A,CDK5,RHOA,PRKCG,PIK3CA,FADD
GO:BP	innate immune response-activating signal transduction	GO:0002758	2.79E-20	19.55375422	302	618	54	17847	UBE2D3,PRKCD,PSMC2,FGG,RAF1,PSMA5,UBA52,UBC,ESR1,SRC,EP300,CREBBP,TRAF6,IKBKG,IKBKE,FYN,UBE2D2,RELA,NFKB1,PRKACA,UBB,RPS27A,NFKBIA,LYN,IKBKB,SYK,CHUK,CASP8,PAK1,PSMC5,CAV1,HSPA1A,ARRB2,PSMA1,PAK2,PSMD4,BTRC,TBK1,PRKCE,PSMD2,BTK,PDPK1,HMGB1,PSMA3,ITCH,MAP3K7,PSMC1,HRAS,PSMD13,PSMC6,PSMA6,PSMC4,FADD,NR1H3
GO:BP	response to peptide	GO:1901652	3.04E-20	19.51729491	532	618	72	17847	LPIN2,ATP6V1B2,PHIP,RAB8A,PRKCD,NR4A1,MEN1,IRF5,TP53,GRB2,SRC,YWHAG,PIK3R1,FYN,MDM2,AKT1,RELA,SP1,NFKB1,STAT3,PRKACA,PTPN11,PRKDC,SHC1,PARP1,STAT1,NFKBIA,CRK,GSK3B,PPARG,LYN,VIM,NCK1,MAPK14,JAK2,PRKCZ,SIRT1,APP,IRS1,CHUK,PAK1,APC,CREB1,CAV1,HDAC5,CDK4,PRKCB,STAT5A,INSR,CDC5L,SMARCC1,GH1,RPS6KB1,STAT5B,IGF1R,NOTCH1,PDPK1,CSK,SOS1,KAT2B,MAX,IRS2,PPARA,JUND,PSEN1,CDK5,BCAR1,IQGAP1,PIK3CA,GRB10,CFLAR…
GO:BP	regulation of proteolysis	GO:0030162	3.11E-20	19.50723703	737	618	86	17847	SERPINA6,SIRT2,NR4A1,TRIB1,PSMC2,HFE,RPS6KA2,RAF1,CDKN2A,VEGFA,TP53,SRC,HDAC1,MYC,SMAD3,CSNK2A1,FYN,MDM2,AKT1,HDAC2,STAT3,PRKACA,UBB,MAPK3,LCK,PML,YWHAE,GSK3B,PPARG,SUMO1,LYN,SUMO2,MAPK14,JAK2,SYK,PLK1,SIRT1,CSNK2A2,APP,STUB1,SFN,SMURF1,CASP8,CAV1,HSPA1A,ARRB1,CEBPA,FN1,ARRB2,TNFRSF1B,MGMT,PARK2,PTK2B,PAK2,BTRC,VCP,SMARCC1,DISC1,MAPT,HDAC6,USP7,UBQLN4,MAP3K5,MYH9,ANXA2,GABARAPL2,HMGB1,PSMA3,TAF9,…
GO:BP	animal organ morphogenesis	GO:0009887	3.65E-20	19.4382422	1080	618	107	17847	TMEM119,COL2A1,ANKRD1,COMP,MYH6,MFAP2,FHL2,NIPBL,WDR72,RYR1,TCAP,PSMC2,MYL2,MYOM1,BHLHB3,TGFB3,RXRA,KLK4,CLDN5,FOLR1,XIRP2,RUNX2,MYH7,SOX11,MAGED1,WNT7A,ACTA1,SYNPO2L,PSMA5,VEGFA,TP53,ESR1,SRC,EP300,TRAF6,HDAC1,MYC,AR,EGFR,SMAD3,JUN,SMAD2,CTNNB1,MAPK1,MDM2,ABL1,RELA,HDAC2,SMAD4,STAT3,RARA,MAPK3,PML,TGFBR1,STAT1,CEBPB,MAPK14,SYK,HIF1A,VDR,SMURF1,THRB,CDC42,SMURF2,PSMC5,CAV1,THRA,BCL2,ARRB2,TLE1,BC…
GO:BP	protein modification by small protein conjugation or removal	GO:0070647	3.75E-20	19.42546064	1132	618	110	17847	RNF220,AIMP2,UBE2D3,PSMC2,DCAF7,UCHL3,EPAS1,UBA1,FBXL20,CDKN2A,RAE1,TPR,PSMA5,KLHL21,UBA52,NSMCE2,UBC,TP53,ESR1,EP300,TRAF6,MYC,AR,SMAD3,SMAD2,BRCA1,IKBKG,CTNNB1,FYN,MDM2,ABL1,AKT1,UBE2D2,ACTB,RELA,UBE2I,SMAD4,UBB,PCNA,VHL,PRKDC,CBL,RPS27A,HDAC3,TGFBR1,NFKBIA,SMAD1,SUMO1,SUMO2,HDAC4,CDK1,DAXX,PIN1,HIF1A,PLK1,SIRT1,STUB1,SMURF1,CDK9,TRIM28,CDC42,APC,HGS,ZBTB16,SMURF2,PSMC5,CAV1,HSP90AA1,COPS5,HSPA…
GO:BP	leukocyte activation	GO:0045321	5.37E-20	19.26998689	1296	618	119	17847	RORC,ACTR1B,LRRC8A,MT1G,PTPN6,ATP6AP2,EFNB1,PRKCD,TSLP,S100P,PSMC2,PLA2G2A,CD320,CD8B,HFE,CHRNA4,CAP1,SYNGR1,DERA,RUNX2,RUNX1,SOX11,CDKN2A,COMMD3,PSMA5,DOK3,TP53,GRB2,SRC,EP300,TRAF6,SMAD3,JUN,CTNNB1,MAPK1,PIK3R1,FYN,ABL1,AKT1,NFKB1,STAT3,RARA,PTPN11,PRKDC,LCK,CBL,HSPA8,EEF1A1,CEBPB,LYN,TUBB,NCK1,HDAC4,MAPK14,JAK2,SYK,ERBB2,CDKN1A,PRKCZ,XRCC5,APP,RIF1,ATM,CASP8,CDC42,PAK1,ZBTB16,VAV1,CAV1,HSP90AA…
GO:BP	regulation of mitotic cell cycle phase transition	GO:1901990	6.77E-20	19.16960362	444	618	65	17847	PTPN6,CEP250,SIRT2,PSMC2,CKAP5,NEK6,CDKN2A,CDK2AP2,TPR,PSMA5,CTDSP2,NSMCE2,TP53,EP300,EGFR,BRCA1,YWHAG,MDM2,AKT1,RB1,PRKACA,PCNA,PRKDC,SIN3A,PML,YWHAE,PPP2R1A,TUBB,CDK1,CDKN1A,PLK1,APP,SFN,ATM,APC,PSMC5,HSP90AA1,E2F1,CDK4,BCL2,CCND1,DDB1,DNCL1,PSMA1,PSMD4,BTRC,RBL1,DCTN1,PSMD2,PHB2,PSMA3,RPA2,PSMC1,AKAP9,MAPRE1,CUL4A,PSMD13,CARM1,TUBA4A,MDM4,PSMC6,BRD7,PSMA6,PSMC4,CCNB1
GO:BP	biological regulation	GO:0065007	8.43E-20	19.07438267	12469	618	535	17847	RNF220,RORC,CLNS1A,TMEM219,TPCN1,LPIN2,CLTA,TMEM119,CMTM8,SERPINA6,TMEM14C,CALML6,PSRC1,LRRC8A,JSRP1,NFE2,CCNDBP1,GMDS,AIMP2,PRAMEF6,UBE2D3,COL2A1,MT1G,HFE2,PTPN6,STK38,ANKRD1,ATP6AP2,COMP,OR4F17,NR1H2,CDC123,RUFY4,CSDA,CEP250,NPHP1,MYH6,PFKFB4,PMP22,EFNB1,DUX4,MFAP2,ATP6V1B2,SIGLEC10,FMNL3,FRAT2,PHIP,RAB8A,FHL2,NIPBL,EXOSC1,NBL1,PPFIA1,SIRT2,PRKCD,TSLP,NR4A1,BAG3,RYR1,TRIB1,BOC,IL17B,ESPN,PSMC2,…
GO:BP	cellular response to decreased oxygen levels	GO:0036294	8.79E-20	19.05588201	221	618	46	17847	ANKRD1,SIRT2,PSMC2,EPAS1,MIR210,PSMA5,UBA52,VEGFA,UBC,TP53,SRC,EP300,CREBBP,MYC,MDM2,AKT1,UBB,VHL,CBL,RPS27A,HIF1A,SIRT1,STUB1,PSMC5,E2F1,BCL2,PSMA1,PSMD4,PRKCE,NDRG1,PSMD2,NOTCH1,PHB2,PSMA3,PSMC1,SUV39H1,ATF4,PSMD13,PPARGC1A,MDM4,PSMC6,PSMA6,LMNA,PSMC4,CCNB1,CFLAR
GO:BP	myeloid cell differentiation	GO:0030099	8.86E-20	19.05232601	420	618	63	17847	TMEM14C,NFE2,MT1G,PTPN6,TRIB1,EPAS1,MB,FOS,RUNX1,ALAS2,VEGFA,SRC,EP300,CREBBP,TRAF6,HDAC1,MYC,JUN,CTNNB1,PIK3R1,RB1,PRKCA,STAT3,RARA,PTPN11,SIN3A,PARP1,PML,STAT1,NFKBIA,PPARG,CEBPB,LYN,MAPK14,JAK2,HIF1A,SIRT1,NCOA6,APP,CASP8,CDC42,ZBTB16,CREB1,THRA,HSPA1A,CEBPA,PRKCB,ETS1,PTK2B,SRF,STAT5B,MYH9,ACTN1,ANXA2,KAT2B,GAB2,TAL1,KIT,CUL4A,PSEN1,TGFBR2,FADD,JAK3
GO:BP	positive regulation of immune response	GO:0050778	1.11E-19	18.95525504	894	618	95	17847	UBE2D3,PTPN6,PRKCD,PSMC2,HFE,FGG,RUNX1,RAF1,PSMA5,UBA52,UBC,ESR1,GRB2,SRC,EP300,CREBBP,TRAF6,IKBKG,MAPK1,IKBKE,PIK3R1,FYN,ABL1,UBE2D2,ACTB,RELA,NFKB1,PRKACA,UBB,RARA,MAPK3,PRKDC,PLCG1,LCK,SIN3A,RPS27A,NFKBIA,CRK,LYN,IKBKB,NCK1,MAPK14,SYK,PRKCZ,SIRT1,XRCC5,RIF1,CHUK,DHX9,CASP8,CDC42,PAK1,ACTG1,PSMC5,VAV1,CAV1,HSP90AA1,HSPA1A,BCL2,ARRB2,PRKCB,MLH1,PSMA1,PAK2,PSMD4,BTRC,TBK1,PRKCE,XRCC6,MYB,PSMD2,BT…
GO:BP	activation of immune response	GO:0002253	1.60E-19	18.79670514	724	618	84	17847	UBE2D3,PTPN6,PRKCD,PSMC2,FGG,RUNX1,RAF1,PSMA5,UBA52,UBC,ESR1,GRB2,SRC,EP300,CREBBP,TRAF6,IKBKG,MAPK1,IKBKE,PIK3R1,FYN,ABL1,UBE2D2,ACTB,RELA,NFKB1,PRKACA,UBB,MAPK3,PRKDC,PLCG1,LCK,SIN3A,RPS27A,NFKBIA,CRK,LYN,IKBKB,NCK1,SYK,XRCC5,CHUK,CASP8,CDC42,PAK1,ACTG1,PSMC5,VAV1,CAV1,HSP90AA1,HSPA1A,BCL2,ARRB2,PRKCB,PSMA1,PAK2,PSMD4,BTRC,TBK1,PRKCE,XRCC6,PSMD2,BTK,PDPK1,CSK,SFPQ,HMGB1,PSMA3,ZAP70,ITCH,MAP3K7,…
GO:BP	transmembrane receptor protein serine/threonine kinase signaling pathway	GO:0007178	1.91E-19	18.71959606	350	618	57	17847	UBE2D3,HFE2,COMP,NBL1,MYOCD,MEN1,HFE,TGFB3,CLDN5,FOLR1,RUNX2,FOS,SOX11,UBA52,UBC,TP53,SRC,EP300,CREBBP,SMAD3,JUN,SMAD2,ABL1,SMAD4,UBB,MAPK3,CBL,RPS27A,PARP1,PML,TGFBR1,SMAD1,VIM,MAPK14,PIN1,PRKCZ,SIRT1,STUB1,SMURF1,SMURF2,CREB1,CAV1,HSPA5,HSPA1A,ARRB2,ILK,SKIL,NOTCH1,PDPK1,SMAD9,DNM2,MAP3K7,RHOA,TGFBR2,STRAP,DAB2,BMPR1B
GO:BP	regulation of protein binding	GO:0043393	1.94E-19	18.71144577	225	618	46	17847	PRKCD,MEN1,HFE,CLDN5,SRC,EP300,ABL1,AKT1,ACTB,PRKACA,MAPK3,TGFBR1,PPP2CA,CRK,RUVBL2,GSK3B,HDAC4,PIN1,EPB41,PLK1,APP,STUB1,MAPK8,CDC42,ARF6,CAV1,HSPA5,HDAC5,BCL2,PPP1CA,ARRB1,ARRB2,PARK2,DISC1,PPP2CB,MAP2K1,ANXA2,GTF2F1,MAPRE1,PPARA,PSEN1,CARM1,CDK5,TAF1,DAB2,MET
GO:BP	protein deubiquitination	GO:0016579	2.00E-19	18.69898588	291	618	52	17847	PSMC2,UCHL3,PSMA5,UBA52,UBC,TP53,ESR1,EP300,TRAF6,MYC,AR,SMAD3,SMAD2,BRCA1,IKBKG,MDM2,ACTB,SMAD4,UBB,RPS27A,TGFBR1,NFKBIA,SMAD1,CDK1,HIF1A,APC,HGS,SMURF2,PSMC5,COPS5,ARRB2,PARK2,YY1,PSMA1,PSMD4,VCP,USP7,PSMD2,PSMA3,KAT2B,ITCH,MAP3K7,PSMC1,BARD1,PSMD13,RHOA,MDM4,PSMC6,UCHL5,PSMA6,PSMC4,NEDD8
GO:BP	immune response-activating signal transduction	GO:0002757	4.47E-19	18.34927902	644	618	78	17847	UBE2D3,PTPN6,PRKCD,PSMC2,FGG,RUNX1,RAF1,PSMA5,UBA52,UBC,ESR1,GRB2,SRC,EP300,CREBBP,TRAF6,IKBKG,MAPK1,IKBKE,PIK3R1,FYN,ABL1,UBE2D2,ACTB,RELA,NFKB1,PRKACA,UBB,MAPK3,PLCG1,LCK,RPS27A,NFKBIA,CRK,LYN,IKBKB,NCK1,SYK,CHUK,CASP8,CDC42,PAK1,ACTG1,PSMC5,VAV1,CAV1,HSP90AA1,HSPA1A,BCL2,ARRB2,PRKCB,PSMA1,PAK2,PSMD4,BTRC,TBK1,PRKCE,PSMD2,BTK,PDPK1,CSK,HMGB1,PSMA3,ZAP70,ITCH,MAP3K7,PSMC1,HRAS,PSMD13,PSEN1,BCAR1…
GO:BP	protein modification by small protein removal	GO:0070646	4.74E-19	18.32466685	308	618	53	17847	PSMC2,UCHL3,PSMA5,UBA52,UBC,TP53,ESR1,EP300,TRAF6,MYC,AR,SMAD3,SMAD2,BRCA1,IKBKG,MDM2,ACTB,SMAD4,UBB,RPS27A,TGFBR1,NFKBIA,SMAD1,CDK1,HIF1A,APC,HGS,SMURF2,PSMC5,COPS5,ARRB2,COPS6,PARK2,YY1,PSMA1,PSMD4,VCP,USP7,PSMD2,PSMA3,KAT2B,ITCH,MAP3K7,PSMC1,BARD1,PSMD13,RHOA,MDM4,PSMC6,UCHL5,PSMA6,PSMC4,NEDD8
GO:BP	DNA metabolic process	GO:0006259	5.27E-19	18.27823587	930	618	96	17847	UBE2D3,ANKRD1,NIPBL,PRKCD,MEN1,RFC4,TOP2A,ZNF93,CHRNA4,FOS,CDKN2A,UBA52,NSMCE2,UBC,TP53,SRC,EP300,MYC,EGFR,BRCA1,CTNNB1,MAPK1,ABL1,AKT1,UBB,PCNA,MAPK3,PRKDC,RPS27A,PARP1,PML,H2AFX,NPM1,RUVBL2,PPARG,MCM7,SUMO1,POLR2A,CDK1,CDKN1A,SIRT1,XRCC5,MCM3,RIF1,DHX9,STUB1,HTATIP,TERF1,CDK9,ATM,TRIM28,TERF2,HSP90AA1,COPS5,MCM2,FANCA,ARRB2,DDB1,MLH1,ATR,COPS6,MGMT,YY1,PTK2B,KPNA2,HNRPA1,CHEK1,CDC5L,VCP,XRCC6,S…
GO:BP	protein localization to organelle	GO:0033365	6.33E-19	18.19875357	949	618	97	17847	TRAM1,SAMM50,UBE2D3,CEP250,NIPBL,PRKCD,BAG3,TXN,RPS26,MAGED1,TPR,KLHL21,UBA52,UBC,TP53,YWHAZ,ESR1,SRC,SMAD3,YWHAG,MAPK1,PIK3R1,FYN,MDM2,AKT1,UBE2D2,RB1,STAT3,UBB,YWHAQ,YWHAB,SIN3A,RPS27A,HDAC3,PARP1,PML,HSPA8,YWHAE,NFKBIA,RUVBL2,GSK3B,SUMO1,MAPK14,FLNA,CDK1,SYK,HSPA4,PIN1,CDKN1A,PRKCZ,PLK1,XRCC5,CSNK2A2,DHX9,SFN,SMURF1,TERF1,ATM,MAPK8,CASP8,TRIM28,APC,HGS,ZBTB16,ARF6,TERF2,HSP90AA1,E2F1,HSPA5,YWH…
GO:BP	stimulatory C-type lectin receptor signaling pathway	GO:0002223	6.74E-19	18.17109247	110	618	33	17847	PRKCD,PSMC2,RAF1,PSMA5,SRC,EP300,CREBBP,TRAF6,IKBKG,FYN,RELA,NFKB1,PRKACA,LYN,IKBKB,SYK,CHUK,PAK1,PSMC5,PSMA1,PAK2,PSMD4,BTRC,PSMD2,PDPK1,PSMA3,MAP3K7,PSMC1,HRAS,PSMD13,PSMC6,PSMA6,PSMC4
GO:BP	cellular response to hypoxia	GO:0071456	7.41E-19	18.13003368	211	618	44	17847	ANKRD1,SIRT2,PSMC2,EPAS1,MIR210,PSMA5,UBA52,VEGFA,UBC,TP53,SRC,EP300,CREBBP,MYC,MDM2,AKT1,UBB,VHL,RPS27A,HIF1A,SIRT1,STUB1,PSMC5,E2F1,BCL2,PSMA1,PSMD4,PRKCE,NDRG1,PSMD2,NOTCH1,PHB2,PSMA3,PSMC1,SUV39H1,PSMD13,PPARGC1A,MDM4,PSMC6,PSMA6,LMNA,PSMC4,CCNB1,CFLAR
GO:BP	cellular macromolecule catabolic process	GO:0044265	8.19E-19	18.08649474	1194	618	111	17847	CLTA,UBE2D3,CSDA,EXOSC1,SIRT2,PRKCD,TRIB1,PSMC2,HFE,UCHL3,RPS26,TMUB1,UBA1,FBXL20,CDKN2A,PSMA5,UBA52,UBC,YWHAZ,CSNK2A1,CTNNB1,MDM2,AKT1,UBE2D2,PRKCA,UBE2I,PRKACA,UBB,CBL,YWHAB,RPS27A,PML,HSPA8,PPP2CA,NPM1,PPP2R1A,GSK3B,SUMO1,VIM,SUMO2,MAPK14,CDK1,PLK1,SIRT1,CSNK2A2,DHX9,STUB1,HTATIP,RNPS1,SMURF1,ATM,CASP8,SMURF2,PSMC5,CAV1,HSP90AA1,E2F1,HSPA5,HSPA1A,XPO1,ARRB1,CEBPA,ARRB2,SET,NEDD4,SQSTM1,DDB1,ML…
GO:BP	cell-cell signaling	GO:0007267	8.81E-19	18.05483228	1679	618	137	17847	RNF220,ATP6AP2,PMP22,EFNB1,FRAT2,RAB8A,PPFIA1,IL17B,PSMC2,GRM3,TUBB2B,HFE,FOLR1,CHRNA4,GRIK4,FGG,SYNGR1,PIP5K1C,PANX3,RUNX1,SOX11,RAF1,WNT7A,FBXL20,PSMA5,UBA52,UBC,ESR1,GRB2,SRC,HDAC1,AR,EGFR,SMAD3,SMAD2,CSNK2A1,YWHAG,CTNNB1,MAPK1,FYN,ABL1,AKT1,PRKCA,RELA,SMAD4,NFKB1,STAT3,MCC,PRKACA,UBB,RARA,PTPN11,PLCG1,RPS27A,SMARCA4,HSPA8,PPP2CA,RUVBL2,PPP2R1A,GSK3B,LYN,MAPK14,JAK2,FLNA,PIN1,HIF1A,PRKCZ,CSNK2…
GO:BP	negative regulation of molecular function	GO:0044092	9.21E-19	18.03565061	1178	618	110	17847	SERPINA6,PTPN6,STK38,PRKCD,NR4A1,TRIB1,GRM3,MYOCD,MEN1,HFE,SOX11,RAF1,SLN,MIR210,CDKN2A,MYOZ1,VEGFA,TP53,ESR1,SRC,JUN,CSNK2A1,YWHAG,MDM2,ABL1,AKT1,RB1,ACTB,HDAC2,NFKB1,MAPK3,CBL,SIN3A,PPP2CA,YWHAE,NPM1,NFKBIA,RUVBL2,PPP2R1A,GSK3B,PPARG,SUMO1,LYN,IKBKB,NCK1,HDAC4,JAK2,FLNA,PIN1,CDKN1A,PRKCZ,PLK1,SIRT1,APP,CHUK,STUB1,SFN,TERF1,ESR2,MAPK8,CASP8,APC,TERF2,CAV1,E2F1,HSPA5,PPP1CA,ARRB1,CEBPA,MCM2,ARRB2…
GO:BP	ubiquitin-dependent protein catabolic process	GO:0006511	9.69E-19	18.01369418	637	618	77	17847	UBE2D3,SIRT2,TRIB1,PSMC2,HFE,UCHL3,TMUB1,UBA1,FBXL20,CDKN2A,PSMA5,UBA52,UBC,CSNK2A1,CTNNB1,MDM2,AKT1,UBE2D2,UBE2I,UBB,CBL,RPS27A,PML,GSK3B,SUMO1,SUMO2,CDK1,PLK1,SIRT1,CSNK2A2,STUB1,HTATIP,SMURF1,SMURF2,PSMC5,CAV1,HSPA5,HSPA1A,ARRB1,CEBPA,ARRB2,NEDD4,SQSTM1,DDB1,PARK2,PTK2B,PSMA1,PSMD4,BTRC,VCP,SMARCC1,DISC1,PPP2CB,HDAC6,USP7,UBQLN4,PSMD2,TSG101,PSMA3,TAF9,ITCH,PSMC1,SIAH1,CUL4A,PSMD13,PSEN1,AXIN1…
GO:BP	regulation of hemopoiesis	GO:1903706	1.17E-18	17.93214693	481	618	66	17847	NFE2,PTPN6,TRIB1,PSMC2,FOS,RUNX1,CDKN2A,PSMA5,EP300,CREBBP,TRAF6,HDAC1,MYC,JUN,CTNNB1,PIK3R1,ABL1,RB1,PRKCA,STAT3,RARA,SIN3A,STAT1,NFKBIA,CEBPB,LYN,MAPK14,SYK,ERBB2,HIF1A,PRKCZ,CASP8,ZBTB16,PSMC5,CREB1,HSPA1A,FANCA,PRKCB,ETS1,PTK2B,PSMA1,PSMD4,STAT5B,MYB,PSMD2,BTK,NOTCH1,HMGB1,PSMA3,ZAP70,SOS1,KAT2B,TCF3,ITCH,PSMC1,TAL1,CUL4A,PSMD13,RHOA,TGFBR2,PTPRC,PSMC6,PSMA6,PSMC4,FADD,JAK3
GO:BP	gland development	GO:0048732	1.26E-18	17.90027522	441	618	63	17847	HFE,TGFB3,RXRA,CSN3,ASNS,RAF1,VEGFA,ESR1,SRC,AR,EGFR,SMAD3,JUN,SMAD2,CTNNB1,MAPK1,ABL1,AKT1,RELA,SMAD4,RARA,PCNA,MAPK3,PRKDC,PML,TGFBR1,NCOR2,NCOA1,CEBPB,JAK2,HIF1A,VDR,CSNK2A2,ATM,THRB,CDC42,ARF6,CREB1,CAV1,THRA,CDH1,BCL2,CEBPA,CCND1,STAT5A,ETS1,AIRE,INSR,MGMT,BTRC,SMARCC1,SRF,NOTCH1,PHB2,MAP2K1,IRS2,PSEN1,TGFBR2,ERBB4,PIK3CA,MET,CFLAR,FADD
GO:BP	leukocyte differentiation	GO:0002521	1.35E-18	17.87050888	524	618	69	17847	RORC,LRRC8A,MT1G,PTPN6,TRIB1,RUNX2,FOS,RUNX1,CDKN2A,VEGFA,TP53,SRC,EP300,TRAF6,MYC,JUN,CTNNB1,PIK3R1,ABL1,RB1,PRKCA,STAT3,RARA,PRKDC,LCK,PARP1,PPARG,CEBPB,LYN,HDAC4,MAPK14,SYK,ERBB2,PRKCZ,SIRT1,APP,ATM,CASP8,CDC42,ZBTB16,VAV1,CREB1,HDAC5,BCL2,CEBPA,FANCA,AIRE,PTK2B,SRF,MYH9,MYB,BTK,ANXA2,BCL3,HMGB1,ZAP70,SOS1,GAB2,TCF3,TAL1,KIT,ITGB1,CUL4A,PSEN1,RHOA,TGFBR2,PTPRC,FADD,JAK3
GO:BP	regulation of MAP kinase activity	GO:0043405	1.35E-18	17.8692884	339	618	55	17847	PTPN6,STK38,PRKCD,TRIB1,TGFB3,RAF1,MAGED1,UBA52,VEGFA,UBC,SRC,TRAF6,EGFR,IKBKG,MAPK1,UBB,MAPK3,PTPN11,SHC1,RPS27A,TGFBR1,PPP2CA,CRK,PPP2R1A,LYN,MAPK14,JAK2,CDK1,DAXX,SYK,ERBB2,MAP3K14,PAK1,HGS,CAV1,ARRB1,INSR,PTK2B,TNIK,GH1,ILK,MAP3K5,TSG101,IGF1R,PDGFRB,CSK,MAP2K1,DVL2,MAP3K7,HRAS,KIT,PSEN1,IQGAP1,GADD45G,PTPRC
GO:BP	negative regulation of cell population proliferation	GO:0008285	1.54E-18	17.81124655	765	618	85	17847	AIMP2,PTPN6,PMP22,DUX4,SIRT2,TRIB1,PLA2G2A,PLXNB1,MYOCD,MEN1,TGFB3,RPS6KA2,SOX11,RAF1,MAGED1,CDKN2A,TP53,MYC,AR,SMAD3,JUN,SMAD2,CTNNB1,RB1,SMAD4,STAT3,MCC,RARA,VHL,PML,TGFBR1,NPM1,STAT1,PPARG,CEBPB,LYN,HDAC4,JAK2,ERBB2,CDKN1A,RBBP4,VDR,APP,SFN,ATM,PAK1,APC,HGS,ZBTB16,CAV1,E2F1,HSPA1A,MYOD1,BCL2,CEBPA,ETS1,PTK2B,ATF2,SRF,ILK,NDRG1,STRN,DDX20,BTK,ING1,TSG101,NOTCH1,CSK,PHB2,MAP2K1,KAT2B,ITCH,HRAS,S…
GO:BP	modification-dependent protein catabolic process	GO:0019941	1.73E-18	17.76173412	643	618	77	17847	UBE2D3,SIRT2,TRIB1,PSMC2,HFE,UCHL3,TMUB1,UBA1,FBXL20,CDKN2A,PSMA5,UBA52,UBC,CSNK2A1,CTNNB1,MDM2,AKT1,UBE2D2,UBE2I,UBB,CBL,RPS27A,PML,GSK3B,SUMO1,SUMO2,CDK1,PLK1,SIRT1,CSNK2A2,STUB1,HTATIP,SMURF1,SMURF2,PSMC5,CAV1,HSPA5,HSPA1A,ARRB1,CEBPA,ARRB2,NEDD4,SQSTM1,DDB1,PARK2,PTK2B,PSMA1,PSMD4,BTRC,VCP,SMARCC1,DISC1,PPP2CB,HDAC6,USP7,UBQLN4,PSMD2,TSG101,PSMA3,TAF9,ITCH,PSMC1,SIAH1,CUL4A,PSMD13,PSEN1,AXIN1…
GO:BP	innate immune response activating cell surface receptor signaling pathway	GO:0002220	1.74E-18	17.75856777	113	618	33	17847	PRKCD,PSMC2,RAF1,PSMA5,SRC,EP300,CREBBP,TRAF6,IKBKG,FYN,RELA,NFKB1,PRKACA,LYN,IKBKB,SYK,CHUK,PAK1,PSMC5,PSMA1,PAK2,PSMD4,BTRC,PSMD2,PDPK1,PSMA3,MAP3K7,PSMC1,HRAS,PSMD13,PSMC6,PSMA6,PSMC4
GO:BP	Fc-epsilon receptor signaling pathway	GO:0038095	2.44E-18	17.61275798	167	618	39	17847	PSMC2,FOS,PSMA5,GRB2,TRAF6,JUN,IKBKG,MAPK1,PIK3R1,RELA,NFKB1,MAPK3,PLCG1,SHC1,LYN,IKBKB,SYK,CHUK,MAPK8,PAK1,PSMC5,VAV1,PSMA1,PAK2,PSMD4,BTRC,PSMD2,BTK,PDPK1,PSMA3,SOS1,GAB2,MAP3K7,PSMC1,PSMD13,PSMC6,PSMA6,PIK3CA,PSMC4
GO:BP	response to peptide hormone	GO:0043434	2.60E-18	17.58477	447	618	63	17847	LPIN2,ATP6V1B2,PHIP,RAB8A,PRKCD,NR4A1,MEN1,GRB2,SRC,YWHAG,PIK3R1,FYN,MDM2,AKT1,RELA,SP1,NFKB1,STAT3,PRKACA,PTPN11,PRKDC,SHC1,PARP1,STAT1,CRK,GSK3B,PPARG,LYN,NCK1,JAK2,PRKCZ,SIRT1,IRS1,CHUK,PAK1,APC,CREB1,CAV1,HDAC5,CDK4,PRKCB,STAT5A,INSR,CDC5L,SMARCC1,GH1,RPS6KB1,STAT5B,IGF1R,PDPK1,CSK,SOS1,KAT2B,MAX,IRS2,PPARA,JUND,BCAR1,IQGAP1,PIK3CA,GRB10,CFLAR,JAK3
GO:BP	homeostatic process	GO:0042592	2.91E-18	17.53676857	1939	618	149	17847	CLNS1A,TPCN1,TMEM119,TMEM14C,LRRC8A,JSRP1,COL2A1,MT1G,HFE2,PTPN6,NR1H2,MFAP2,ATP6V1B2,BAG3,RYR1,TXN,ADIPOR2,MEN1,HFE,ACACA,RFC4,MT2A,APLNR,SCD,C9ORF47,EPAS1,MB,ATP2A1,RAF1,CLN5,SLN,MIR210,TM6SF2,RALY,ALAS2,NSMCE2,VEGFA,ESR1,SRC,CREBBP,TRAF6,MYC,EGFR,SMAD3,CTNNB1,MAPK1,PIK3R1,FYN,ABL1,AKT1,RB1,PRKCA,ACTB,SMAD4,STAT3,PRKACA,UBB,PCNA,MAPK3,PTPN11,PRKDC,PLCG1,LCK,SIN3A,HDAC3,PARP1,PML,SMARCA4,YWHAE,S…
GO:BP	positive regulation of DNA-binding transcription factor activity	GO:0051091	3.15E-18	17.50221004	262	618	48	17847	MYOCD,UBA52,VEGFA,UBC,ESR1,EP300,TRAF6,AR,SMAD3,IKBKG,CTNNB1,AKT1,RELA,NFKB1,STAT3,UBB,RPS27A,SMARCA4,NPM1,PPARG,IKBKB,HDAC4,JAK2,PRKCZ,APP,CHUK,DHX9,ESR2,NFKB2,CAV1,COPS5,HDAC5,HSPA1A,PRKCB,ATF2,SRF,BTK,PHB2,DVL2,TCF3,MAP3K7,SMARCB1,KIT,PPARGC1A,CARM1,TAF1,PSMA6,CFLAR
GO:BP	nervous system development	GO:0007399	3.75E-18	17.42585823	2400	618	171	17847	CMTM8,COL2A1,ANKRD1,ATP6AP2,PMP22,EFNB1,RAB8A,NIPBL,NBL1,SIRT2,BAG3,BOC,PLXNB1,TUBB2B,MEN1,COX17,SCRG1,BHLHB3,VCAN,CLDN5,FOLR1,TACC1,RUNX2,FOS,RUNX1,SOX11,SGK1,CLN5,WNT7A,MIR210,DHX30,KIF1A,VEGFA,TP53,YWHAZ,GRB2,SRC,EP300,TRAF6,HDAC1,EGFR,JUN,YWHAG,CTNNB1,MAPK1,PIK3R1,FYN,MDM2,ABL1,AKT1,RB1,PRKCA,ACTB,RELA,HDAC2,SMAD4,STAT3,PRKACA,UBB,RARA,MAPK3,PTPN11,PRKDC,PLCG1,SHC1,YWHAQ,SIN3A,SMARCA4,TGFBR1,…
GO:BP	localization	GO:0051179	3.80E-18	17.42077688	6824	618	351	17847	SNRPF,ACTR1B,CLNS1A,TRAM1,TPCN1,CLTA,TMEM14C,SAMM50,PSRC1,LRRC8A,JSRP1,UBE2D3,DNAH2,SLC13A5,PTPN6,ANKRD1,ATP6AP2,COMP,NR1H2,CEP250,NPHP1,EFNB1,ATP6V1B2,FMNL3,RAB8A,NIPBL,NBL1,PPFIA1,PRKCD,TSLP,S100P,NR4A1,BAG3,RYR1,TRIB1,PSMC2,PLA2G2A,SLC38A10,PLXNB1,CD320,MYOCD,TXN,MYOM1,TUBB2B,CKAP5,ADIPOR2,HFE,COX17,ACACA,SLC3A2,TGFB3,RXRA,SLC25A22,CSN3,SAA2,CLDN5,APLNR,FOLR1,SLC36A2,CHRNA4,COX7A2,RAB1B,HBG1,F…
GO:BP	Wnt signaling pathway	GO:0016055	4.52E-18	17.34443182	521	618	68	17847	RNF220,ATP6AP2,FRAT2,PSMC2,FOLR1,RUNX1,WNT7A,PSMA5,UBA52,UBC,ESR1,SRC,HDAC1,EGFR,SMAD3,CSNK2A1,CTNNB1,ABL1,NFKB1,MCC,UBB,RPS27A,SMARCA4,PPP2CA,RUVBL2,PPP2R1A,GSK3B,MAPK14,PIN1,CSNK2A2,APP,SMURF1,CDC42,APC,SMURF2,PSMC5,CAV1,PPP1CA,ARRB2,CCND1,DDB1,TLE1,PARK2,PSMA1,PSMD4,BTRC,VCP,DISC1,TNIK,CLTC,ILK,STRN,PSMD2,NOTCH1,PSMA3,DVL2,MAP3K7,PSMC1,PSMD13,PSEN1,RHOA,AXIN1,PSMC6,BRD7,PSMA6,DAB2,PSMC4,GRB10
GO:BP	proteasome-mediated ubiquitin-dependent protein catabolic process	GO:0043161	4.64E-18	17.33307683	425	618	61	17847	UBE2D3,SIRT2,TRIB1,PSMC2,HFE,TMUB1,FBXL20,PSMA5,UBA52,UBC,CTNNB1,MDM2,AKT1,UBB,RPS27A,PML,GSK3B,SUMO1,SUMO2,CDK1,PLK1,SIRT1,STUB1,HTATIP,SMURF1,SMURF2,PSMC5,CAV1,HSPA5,HSPA1A,ARRB1,CEBPA,ARRB2,NEDD4,DDB1,PARK2,PSMA1,PSMD4,BTRC,VCP,SMARCC1,PPP2CB,USP7,UBQLN4,PSMD2,PSMA3,TAF9,ITCH,PSMC1,SIAH1,CUL4A,PSMD13,PSEN1,PSMC6,UCHL5,TAF1,PSMA6,DAB2,PCBP2,PSMC4,CCNB1
GO:BP	modification-dependent macromolecule catabolic process	GO:0043632	4.92E-18	17.30839998	654	618	77	17847	UBE2D3,SIRT2,TRIB1,PSMC2,HFE,UCHL3,TMUB1,UBA1,FBXL20,CDKN2A,PSMA5,UBA52,UBC,CSNK2A1,CTNNB1,MDM2,AKT1,UBE2D2,UBE2I,UBB,CBL,RPS27A,PML,GSK3B,SUMO1,SUMO2,CDK1,PLK1,SIRT1,CSNK2A2,STUB1,HTATIP,SMURF1,SMURF2,PSMC5,CAV1,HSPA5,HSPA1A,ARRB1,CEBPA,ARRB2,NEDD4,SQSTM1,DDB1,PARK2,PTK2B,PSMA1,PSMD4,BTRC,VCP,SMARCC1,DISC1,PPP2CB,HDAC6,USP7,UBQLN4,PSMD2,TSG101,PSMA3,TAF9,ITCH,PSMC1,SIAH1,CUL4A,PSMD13,PSEN1,AXIN1…
GO:BP	negative regulation of protein metabolic process	GO:0051248	5.13E-18	17.28950681	1186	618	109	17847	SERPINA6,PTPN6,STK38,SIRT2,PRKCD,NR4A1,TRIB1,MYOCD,MEN1,HFE,AATF,RAF1,MIR210,CDKN2A,TPR,MYOZ1,CTDSP2,VEGFA,TP53,SRC,MYC,EGFR,SMAD3,JUN,BRCA1,CSNK2A1,YWHAG,CTNNB1,FYN,MDM2,ABL1,AKT1,RB1,RELA,HDAC2,SMAD4,NFKB1,STAT3,RARA,PRKDC,NCOR1,CBL,YWHAB,SIN3A,HDAC3,PML,PPP2CA,YWHAE,NPM1,PPP2R1A,GSK3B,LYN,IKBKB,NCK1,FLNA,PIN1,CDKN1A,PRKCZ,PLK1,SIRT1,CSNK2A2,APP,SFN,APC,CAV1,HSPA1A,ARRB1,CEBPA,ARRB2,SET,NCL,PAR…
GO:BP	cell-cell signaling by wnt	GO:0198738	5.61E-18	17.25081344	523	618	68	17847	RNF220,ATP6AP2,FRAT2,PSMC2,FOLR1,RUNX1,WNT7A,PSMA5,UBA52,UBC,ESR1,SRC,HDAC1,EGFR,SMAD3,CSNK2A1,CTNNB1,ABL1,NFKB1,MCC,UBB,RPS27A,SMARCA4,PPP2CA,RUVBL2,PPP2R1A,GSK3B,MAPK14,PIN1,CSNK2A2,APP,SMURF1,CDC42,APC,SMURF2,PSMC5,CAV1,PPP1CA,ARRB2,CCND1,DDB1,TLE1,PARK2,PSMA1,PSMD4,BTRC,VCP,DISC1,TNIK,CLTC,ILK,STRN,PSMD2,NOTCH1,PSMA3,DVL2,MAP3K7,PSMC1,PSMD13,PSEN1,RHOA,AXIN1,PSMC6,BRD7,PSMA6,DAB2,PSMC4,GRB10
GO:BP	regulation of anatomical structure morphogenesis	GO:0022603	5.80E-18	17.23676833	1170	618	108	17847	FMNL3,PHIP,PSMC2,PLXNB1,ZMYM6,TUBB2B,ZNF135,RXRA,INF2,CLDN5,APLNR,FGG,RUNX2,RUNX1,MAGED1,WNT7A,MIR210,PSMA5,FGD5,VEGFA,ESR1,SRC,MYC,AR,BRCA1,CTNNB1,FYN,ABL1,PRKCA,SP1,SMAD4,STAT3,PLCG1,SIN3A,PML,TGFBR1,STAT1,CRK,GSK3B,PPARG,SMAD1,TNFRSF1A,MAPK14,FLNA,ERBB2,EPB41,HIF1A,SIRT1,VDR,SMURF1,THRB,CDC42,PAK1,HGS,SMURF2,PSMC5,HDAC5,MYOD1,YWHAH,BCL2,JAK1,FN1,ARRB2,NEDD4,PRKCB,ETS1,TNFRSF1B,BCR,PARK2,PTK2B,…
GO:BP	cytoskeleton organization	GO:0007010	6.34E-18	17.19811704	1353	618	118	17847	ACTR1B,PARVG,PSRC1,ANKRD1,CEP250,NPHP1,MYH6,FMNL3,PHIP,PPFIA1,PRKCD,TCAP,ESPN,MYL2,PLXNB1,ZMYM6,MYOM1,TUBB2B,CKAP5,TNNT3,PRPH,ZNF135,TGFB3,INF2,MYH11,NEK6,FLNB,CAP1,XIRP2,TACC1,PIP5K1C,CYTH2,RAF1,ACTA1,RAE1,SYNPO2L,CDK2AP2,TPR,MYOZ1,FGD5,GRB2,SRC,SMAD3,BRCA1,CTNNB1,MAPK1,PIK3R1,ABL1,ACTB,SMAD4,MAPK3,NCOR1,SHC1,HDAC3,TGFBR1,NPM1,CRK,PPP2R1A,GSK3B,IKBKB,VIM,TUBB,NCK1,JAK2,FLNA,CDK1,EPB41,PRKCZ,PLK1…
GO:BP	cellular component morphogenesis	GO:0032989	7.46E-18	17.12748095	1156	618	107	17847	PARVG,PTPN6,ANKRD1,MYH6,PMP22,EFNB1,FMNL3,PHIP,RAB8A,NBL1,BOC,TCAP,MYL2,PLXNB1,ZMYM6,MYOM1,TUBB2B,TNNT3,ZNF135,MYH11,FLNB,CAP1,FGG,SGK1,WNT7A,ACTA1,SYNPO2L,MYOZ1,FGD5,VEGFA,GRB2,SRC,EP300,AR,EGFR,CTNNB1,MAPK1,PIK3R1,FYN,ABL1,RB1,PRKCA,ACTB,SMAD4,UBB,VHL,MAPK3,PTPN11,PLCG1,SHC1,SIN3A,CRK,GSK3B,MAPK14,FLNA,ERBB2,EPB41,PRKCZ,VDR,APP,SMURF1,CDC42,PAK1,ACTG1,CREB1,HSP90AA1,YWHAH,CDH1,BCL2,FN1,NEDD4,PA…
GO:BP	response to inorganic substance	GO:0010035	8.31E-18	17.08034416	570	618	71	17847	MT1G,PRKCD,RYR1,TXN,HFE,MT2A,MB,FGG,FOS,ACTA1,SRC,EGFR,JUN,MAPK1,FYN,MDM2,ABL1,AKT1,RELA,HDAC2,PCNA,MAPK3,PARP1,PPP2CA,STAT1,CRK,SUMO1,CDK1,DAXX,HIF1A,SIRT1,APP,CHUK,MAPK8,CASP8,CREB1,CAV1,HSPA5,CDK4,CDH1,BCL2,PPP1CA,CEBPA,NEDD4,CCND1,ETS1,PARK2,PTK2B,HNRPA1,VCP,PPP2CB,MAPT,ATF2,HDAC6,NDRG1,MAP3K5,MYB,PDGFRB,DNM2,DLG4,ATF4,STK24,KIT,JUND,PPARGC1A,FUS,IQGAP1,KDR,CCNB1,MET,CFLAR
GO:BP	response to radiation	GO:0009314	1.15E-17	16.93836805	446	618	62	17847	CEP250,NPHP1,NIPBL,TXN,MEN1,ASNS,FOS,TP53,GRB2,EP300,CREBBP,MYC,EGFR,JUN,BRCA1,PIK3R1,MDM2,AKT1,RELA,PCNA,PRKDC,CBL,PARP1,PML,H2AFX,NPM1,RUVBL2,MAPK14,CDKN1A,HIF1A,SIRT1,XRCC5,APP,HTATIP,ATM,MAPK8,CREB1,HSPA5,BCL2,PPP1CA,ARRB1,NEDD4,CCND1,DDB1,ATR,MGMT,YY1,CHEK1,XRCC6,SMC1L1,EEF1D,BCL3,DNM2,ATF4,HRAS,KIT,ITGB1,UNC119,JUND,CDK5,PTPRC,TAF1
GO:BP	immune response-regulating cell surface receptor signaling pathway	GO:0002768	1.24E-17	16.90730102	502	618	66	17847	PTPN6,PRKCD,PSMC2,FOS,RUNX1,RAF1,PSMA5,GRB2,SRC,EP300,CREBBP,TRAF6,JUN,IKBKG,MAPK1,PIK3R1,FYN,ABL1,ACTB,RELA,NFKB1,PRKACA,MAPK3,PLCG1,LCK,SHC1,CRK,LYN,IKBKB,NCK1,SYK,CHUK,MAPK8,CDC42,PAK1,ACTG1,PSMC5,VAV1,HSP90AA1,BCL2,PRKCB,PSMA1,PAK2,PSMD4,BTRC,PRKCE,PSMD2,BTK,PDPK1,CSK,PSMA3,ZAP70,SOS1,GAB2,MAP3K7,PSMC1,HRAS,KIT,PSMD13,PSEN1,BCAR1,PTPRC,PSMC6,PSMA6,PIK3CA,PSMC4
GO:BP	catabolic process	GO:0009056	1.27E-17	16.89731868	2665	618	182	17847	TPCN1,LPIN2,CLTA,GK5,UBE2D3,RUFY4,CSDA,PFKFB4,ATP6V1B2,RAB8A,EXOSC1,SIRT2,PRKCD,BAG3,TRIB1,PSMC2,PLA2G2A,HFE,GCAT,VCAN,KLK4,UCHL3,RAB1B,HBG1,RPS26,TMUB1,DERA,TM9SF1,UBA1,CLN5,MIR210,FBXL20,CDKN2A,RAE1,TPR,PSMA5,SMOX,UBA52,UBC,TP53,YWHAZ,SRC,EP300,EGFR,SMAD3,IKBKG,CSNK2A1,CTNNB1,FYN,MDM2,ABL1,AKT1,UBE2D2,PRKCA,RELA,UBE2I,STAT3,PRKACA,UBB,MAPK3,NCOR1,PLCG1,CBL,YWHAB,RPS27A,PML,HSPA8,PPP2CA,NPM1,PPP…
GO:BP	cellular protein catabolic process	GO:0044257	1.51E-17	16.82217807	792	618	85	17847	CLTA,UBE2D3,SIRT2,TRIB1,PSMC2,HFE,UCHL3,TMUB1,UBA1,FBXL20,CDKN2A,PSMA5,UBA52,UBC,CSNK2A1,CTNNB1,MDM2,AKT1,UBE2D2,UBE2I,PRKACA,UBB,CBL,RPS27A,PML,GSK3B,SUMO1,SUMO2,CDK1,PLK1,SIRT1,CSNK2A2,STUB1,HTATIP,SMURF1,CASP8,SMURF2,PSMC5,CAV1,HSP90AA1,HSPA5,HSPA1A,ARRB1,CEBPA,ARRB2,NEDD4,SQSTM1,DDB1,PARK2,PTK2B,PSMA1,PSMD4,BTRC,VCP,SMARCC1,DISC1,PPP2CB,HDAC6,CLTC,USP7,UBQLN4,PSMD2,TSG101,ANXA2,GABARAPL2,PSMA…
GO:BP	immune response	GO:0006955	1.74E-17	16.75942794	2286	618	164	17847	RORC,ACTR1B,UBE2D3,COL2A1,PTPN6,ATP6AP2,NR1H2,SIGLEC10,SIRT2,PRKCD,S100P,IL17B,PSMC2,PLA2G2A,CD8B,HFE,IFI44L,MT2A,TGFB3,FLNB,IRF5,CAP1,KIR2DL3,FGG,SYNGR1,DERA,FOS,RUNX1,RAF1,COMMD3,PSMA5,DOK3,UBA52,UBC,TP53,ESR1,GRB2,SRC,EP300,CREBBP,TRAF6,SMAD3,JUN,IKBKG,MAPK1,IKBKE,PIK3R1,FYN,ABL1,UBE2D2,ACTB,RELA,NFKB1,STAT3,PRKACA,UBB,RARA,MAPK3,PTPN11,PRKDC,PLCG1,LCK,CBL,SHC1,SIN3A,RPS27A,PML,HSPA8,STAT1,NFK…
GO:BP	cell surface receptor signaling pathway involved in cell-cell signaling	GO:1905114	2.09E-17	16.67886633	624	618	74	17847	RNF220,ATP6AP2,FRAT2,PSMC2,FOLR1,CHRNA4,RUNX1,WNT7A,PSMA5,UBA52,UBC,ESR1,SRC,HDAC1,EGFR,SMAD3,CSNK2A1,CTNNB1,ABL1,AKT1,NFKB1,MCC,UBB,RPS27A,SMARCA4,PPP2CA,RUVBL2,PPP2R1A,GSK3B,MAPK14,PIN1,PRKCZ,CSNK2A2,APP,SMURF1,CDC42,APC,SMURF2,PSMC5,CAV1,PPP1CA,ARRB2,CCND1,DDB1,TLE1,PARK2,PTK2B,PSMA1,PSMD4,BTRC,VCP,DISC1,TNIK,CLTC,ILK,STRN,PSMD2,NOTCH1,PSMA3,DLG4,DVL2,MAP3K7,PSMC1,PSMD13,PSEN1,CDK5,RHOA,AXIN1,…
GO:BP	positive regulation of establishment of protein localization	GO:1904951	2.13E-17	16.67209435	465	618	63	17847	UBE2D3,ANKRD1,PRKCD,TSLP,BAG3,MYOM1,TGFB3,FGG,PANX3,TPR,TP53,YWHAZ,SRC,EGFR,SMAD3,YWHAG,MAPK1,PIK3R1,FYN,MDM2,ABL1,PRKACA,MAPK3,YWHAQ,YWHAB,HDAC3,YWHAE,GSK3B,MAPK14,JAK2,FLNA,SYK,ERBB2,HIF1A,PRKCZ,CSNK2A2,CHUK,DHX9,SFN,MAPK8,CASP8,TRIM28,CDC42,PAK1,ARF6,E2F1,YWHAH,CDH1,BCL2,ARRB1,PRKCB,PRKCE,NR0B2,TSG101,PTP4A3,HMGB1,TCP1,IRS2,HRAS,PSEN1,CDK5,CCT5,TNFRSF14
GO:BP	proteolysis involved in cellular protein catabolic process	GO:0051603	2.46E-17	16.60859932	734	618	81	17847	UBE2D3,SIRT2,TRIB1,PSMC2,HFE,UCHL3,TMUB1,UBA1,FBXL20,CDKN2A,PSMA5,UBA52,UBC,CSNK2A1,CTNNB1,MDM2,AKT1,UBE2D2,UBE2I,PRKACA,UBB,CBL,RPS27A,PML,GSK3B,SUMO1,SUMO2,CDK1,PLK1,SIRT1,CSNK2A2,STUB1,HTATIP,SMURF1,CASP8,SMURF2,PSMC5,CAV1,HSPA5,HSPA1A,ARRB1,CEBPA,ARRB2,NEDD4,SQSTM1,DDB1,PARK2,PTK2B,PSMA1,PSMD4,BTRC,VCP,SMARCC1,DISC1,PPP2CB,HDAC6,USP7,UBQLN4,PSMD2,TSG101,GABARAPL2,PSMA3,TAF9,ITCH,PSMC1,SIAH1,C…
GO:BP	proteasomal protein catabolic process	GO:0010498	3.01E-17	16.52141737	482	618	64	17847	UBE2D3,SIRT2,TRIB1,PSMC2,HFE,TMUB1,FBXL20,PSMA5,UBA52,UBC,CTNNB1,MDM2,AKT1,PRKACA,UBB,RPS27A,PML,GSK3B,SUMO1,SUMO2,CDK1,PLK1,SIRT1,STUB1,HTATIP,SMURF1,SMURF2,PSMC5,CAV1,HSPA5,HSPA1A,ARRB1,CEBPA,ARRB2,NEDD4,DDB1,PARK2,PSMA1,PSMD4,BTRC,VCP,SMARCC1,PPP2CB,USP7,UBQLN4,PSMD2,GABARAPL2,PSMA3,TAF9,ITCH,PSMC1,SIAH1,CUL4A,PSMD13,PSEN1,PRKCG,PSMC6,UCHL5,TAF1,PSMA6,DAB2,PCBP2,PSMC4,CCNB1
GO:BP	positive regulation of proteolysis	GO:0045862	3.27E-17	16.48566273	362	618	55	17847	SIRT2,TRIB1,PSMC2,CDKN2A,SRC,MYC,SMAD3,FYN,MDM2,AKT1,HDAC2,STAT3,MAPK3,LCK,PML,GSK3B,PPARG,SUMO1,LYN,SUMO2,MAPK14,JAK2,SYK,PLK1,SIRT1,APP,STUB1,SMURF1,CASP8,CAV1,HSPA1A,ARRB1,CEBPA,FN1,TNFRSF1B,PARK2,PTK2B,BTRC,VCP,DISC1,MAPT,MAP3K5,MYH9,HMGB1,FASLG,PSMC1,PSEN1,RHOA,AXIN1,TAF1,FAS,DAB2,PSMC4,CFLAR,FADD
GO:BP	tube development	GO:0035295	3.74E-17	16.42761183	1127	618	104	17847	AIMP2,COL2A1,ATP6AP2,COMP,FMNL3,NIPBL,NR4A1,TCAP,MYOCD,ADIPOR2,TGFB3,CLDN5,APLNR,FOLR1,EPAS1,VEZF1,TNS3,RUNX1,SOX11,MAGED1,WNT7A,MIR210,VEGFA,ESR1,SRC,EP300,TRAF6,MYC,AR,EGFR,SMAD3,JUN,SMAD2,BRCA1,CTNNB1,MAPK1,ABL1,AKT1,RB1,PRKCA,SP1,SMAD4,STAT3,PRKACA,UBB,RARA,MAPK3,PLCG1,SHC1,PML,TGFBR1,STAT1,PPARG,SMAD1,MAPK14,SYK,ERBB2,CDKN1A,HIF1A,SIRT1,VDR,THRB,CDC42,PAK1,HGS,CREB1,CAV1,THRA,HDAC5,BCL2,PPP1…
GO:BP	response to wounding	GO:0009611	3.84E-17	16.41592056	692	618	78	17847	NFE2,PTPN6,COMP,SIGLEC10,PRKCD,ADIPOR2,TGFB3,FOLR1,HBG1,FGG,RAF1,WNT7A,MYOZ1,YWHAZ,SRC,HDAC1,EGFR,SMAD3,JUN,SMAD2,MAPK1,PIK3R1,FYN,PRKCA,ACTB,HDAC2,PRKACA,MAPK3,PTPN11,LCK,TGFBR1,CRK,LYN,JAK2,FLNA,CDK1,SYK,ERBB2,CDKN1A,HIF1A,CDC42,PAK1,ACTG1,VAV1,CAV1,MYOD1,BCL2,ARRB1,FN1,ARRB2,PRKCB,ETS1,PRKCE,SRF,ILK,MAP3K5,MYH9,NOTCH1,PDGFRB,PDPK1,PHB2,MAP2K1,ANXA2,MAX,HRAS,CBX5,STK24,PPARA,HSPB1,CDK5,RHOA,TGF…
GO:BP	regulation of DNA metabolic process	GO:0051052	4.12E-17	16.38498033	351	618	54	17847	ANKRD1,PRKCD,MEN1,RFC4,ZNF93,CDKN2A,TP53,SRC,MYC,EGFR,BRCA1,CTNNB1,MAPK1,AKT1,PCNA,MAPK3,PRKDC,PARP1,PML,H2AFX,NPM1,PPARG,CDKN1A,SIRT1,XRCC5,RIF1,DHX9,TERF1,CDK9,ATM,TRIM28,TERF2,HSP90AA1,ARRB2,MLH1,ATR,MGMT,PTK2B,KPNA2,HNRPA1,CHEK1,USP7,UBQLN4,PDGFRB,HMGB1,RPA2,TCP1,CUL4A,PPARGC1A,FUS,CCT5,PRKCG,PTPRC,PIK3CA
GO:BP	regulation of transport	GO:0051049	4.90E-17	16.31024209	1915	618	145	17847	TPCN1,JSRP1,UBE2D3,PTPN6,ANKRD1,NR1H2,RAB8A,PRKCD,TSLP,BAG3,TXN,MYOM1,ADIPOR2,HFE,COX17,TGFB3,APLNR,CHRNA4,FGG,PANX3,SOX11,ATP2A1,SGK1,WNT7A,SLN,CACNG6,MIR210,FBXL20,TPR,VEGFA,TP53,YWHAZ,SRC,TRAF6,EGFR,SMAD3,YWHAG,CTNNB1,MAPK1,PIK3R1,FYN,MDM2,ABL1,AKT1,PRKCA,ACTB,SMAD4,NFKB1,PRKACA,MAPK3,PTPN11,NCOR1,PLCG1,CBL,YWHAQ,YWHAB,HDAC3,PML,HSPA8,YWHAE,NFKBIA,GSK3B,PPARG,CEBPB,SUMO1,TNFRSF1A,LYN,MAPK14,JA…
GO:BP	regulation of establishment of protein localization	GO:0070201	5.26E-17	16.27922846	775	618	83	17847	UBE2D3,ANKRD1,RAB8A,PRKCD,TSLP,BAG3,TXN,MYOM1,TGFB3,FGG,PANX3,TPR,TP53,YWHAZ,SRC,TRAF6,EGFR,SMAD3,YWHAG,MAPK1,PIK3R1,FYN,MDM2,ABL1,PRKCA,PRKACA,MAPK3,PTPN11,YWHAQ,YWHAB,HDAC3,PML,HSPA8,YWHAE,GSK3B,LYN,MAPK14,JAK2,FLNA,SYK,ERBB2,HIF1A,PRKCZ,CSNK2A2,IRS1,CHUK,DHX9,SFN,TERF1,MAPK8,CASP8,TRIM28,CDC42,PAK1,ARF6,E2F1,YWHAH,CDH1,BCL2,XPO1,ARRB1,FN1,PRKCB,TNFRSF1B,PARK2,PRKCE,MAPT,HDAC6,NR0B2,TSG101,PTP4…
GO:BP	negative regulation of phosphate metabolic process	GO:0045936	5.45E-17	16.26339633	589	618	71	17847	PTPN6,STK38,SIRT2,PRKCD,TRIB1,MYOCD,MEN1,MIR210,CDKN2A,MYOZ1,CTDSP2,MYC,JUN,YWHAG,ABL1,AKT1,RB1,SMAD4,STAT3,PRKDC,NCOR1,CBL,YWHAB,HDAC3,PARP1,PPP2CA,YWHAE,NPM1,PPP2R1A,GSK3B,LYN,IKBKB,NCK1,HDAC4,PIN1,CDKN1A,PRKCZ,PLK1,SIRT1,SFN,APC,CAV1,ARRB1,CEBPA,ARRB2,SET,DNCL1,PARK2,PAK2,MAPT,ILK,TSG101,IGF1R,PDPK1,CSK,KAT2B,ITCH,IRS2,PPARA,PHB,HSPB1,PSEN1,PPARGC1A,ATF3,RHOA,STRAP,CD2BP2,IQGAP1,PTPRC,CCNB1,GR…
GO:BP	establishment of localization in cell	GO:0051649	5.90E-17	16.22926703	2271	618	162	17847	SNRPF,ACTR1B,TRAM1,TPCN1,CLTA,SAMM50,PSRC1,JSRP1,UBE2D3,PTPN6,RAB8A,PPFIA1,PRKCD,BAG3,RYR1,TXN,HFE,ACACA,APLNR,FOLR1,CHRNA4,RAB1B,RPS26,SYNGR1,PIP5K1C,ATP2A1,RAF1,CLN5,WNT7A,MIR210,FBXL20,RAE1,TPR,KIF1A,KLHL21,UBA52,UBC,TP53,YWHAZ,SRC,SMAD3,IKBKG,YWHAG,CTNNB1,MAPK1,PIK3R1,FYN,MDM2,ABL1,AKT1,UBE2D2,ACTB,STAT3,PRKACA,UBB,MAPK3,PTPN11,PLCG1,LCK,CBL,YWHAQ,YWHAB,RPS27A,HDAC3,PML,HSPA8,YWHAE,NPM1,NFKBI…
GO:BP	negative regulation of phosphorus metabolic process	GO:0010563	6.01E-17	16.22143683	590	618	71	17847	PTPN6,STK38,SIRT2,PRKCD,TRIB1,MYOCD,MEN1,MIR210,CDKN2A,MYOZ1,CTDSP2,MYC,JUN,YWHAG,ABL1,AKT1,RB1,SMAD4,STAT3,PRKDC,NCOR1,CBL,YWHAB,HDAC3,PARP1,PPP2CA,YWHAE,NPM1,PPP2R1A,GSK3B,LYN,IKBKB,NCK1,HDAC4,PIN1,CDKN1A,PRKCZ,PLK1,SIRT1,SFN,APC,CAV1,ARRB1,CEBPA,ARRB2,SET,DNCL1,PARK2,PAK2,MAPT,ILK,TSG101,IGF1R,PDPK1,CSK,KAT2B,ITCH,IRS2,PPARA,PHB,HSPB1,PSEN1,PPARGC1A,ATF3,RHOA,STRAP,CD2BP2,IQGAP1,PTPRC,CCNB1,GR…
GO:BP	defense response	GO:0006952	6.51E-17	16.18638416	1760	618	137	17847	UBE2D3,PTPN6,NR1H2,SIGLEC10,SIRT2,PRKCD,TSLP,IL17B,PSMC2,PLA2G2A,HFE,IFI44L,MT2A,SAA2,C9ORF47,FLNB,IRF5,VEZF1,FGG,FOS,RAF1,FBXL20,PSMA5,UBA52,UBC,TP53,ESR1,SRC,EP300,CREBBP,TRAF6,EGFR,SMAD3,JUN,IKBKG,IKBKE,FYN,AKT1,UBE2D2,RB1,RELA,NFKB1,STAT3,PRKACA,UBB,MAPK3,PTPN11,PRKDC,SHC1,SIN3A,RPS27A,PML,STAT1,NFKBIA,CRK,PPARG,CEBPB,SUMO1,TNFRSF1A,LYN,IKBKB,VIM,TUBB,HDAC4,MAPK14,JAK2,FLNA,SYK,HIF1A,PRKCZ,XR…
GO:BP	cellular protein localization	GO:0034613	7.83E-17	16.10620071	1945	618	146	17847	TRAM1,CLTA,SAMM50,UBE2D3,CEP250,RAB8A,NIPBL,PPFIA1,PRKCD,BAG3,TXN,HFE,RAB1B,FLNB,EFR3A,RPS26,SYNGR1,TM9SF1,MAGED1,RAE1,TPR,KIF1A,KLHL21,UBA52,UBC,TP53,YWHAZ,ESR1,SRC,AR,EGFR,SMAD3,YWHAG,CTNNB1,MAPK1,PIK3R1,FYN,MDM2,AKT1,UBE2D2,RB1,ACTB,STAT3,PRKACA,UBB,PTPN11,YWHAQ,YWHAB,SIN3A,RPS27A,HDAC3,PARP1,PML,HSPA8,YWHAE,NPM1,NFKBIA,RUVBL2,GSK3B,SUMO1,TNFRSF1A,IKBKB,MAPK14,FLNA,CDK1,SYK,HSPA4,ERBB2,PIN1,CD…
GO:BP	negative regulation of protein modification process	GO:0031400	7.89E-17	16.10301326	623	618	73	17847	PTPN6,STK38,SIRT2,PRKCD,TRIB1,MYOCD,MEN1,CDKN2A,MYOZ1,CTDSP2,MYC,JUN,BRCA1,YWHAG,CTNNB1,FYN,ABL1,AKT1,RB1,RELA,HDAC2,SMAD4,PRKDC,NCOR1,CBL,YWHAB,SIN3A,HDAC3,PPP2CA,YWHAE,NPM1,PPP2R1A,GSK3B,LYN,IKBKB,NCK1,PIN1,CDKN1A,PRKCZ,PLK1,SIRT1,SFN,APC,CAV1,HSPA1A,ARRB1,CEBPA,ARRB2,SET,PARK2,PAK2,PRKCE,MAPT,ILK,TSG101,IGF1R,PDPK1,CSK,KAT2B,ITCH,SMARCB1,PHB,HSPB1,PSEN1,PPARGC1A,ATF3,CDK5,DNMT1,STRAP,PRKCG,PTP…
GO:BP	macromolecule localization	GO:0033036	8.43E-17	16.07442197	3228	618	205	17847	TRAM1,CLTA,SAMM50,UBE2D3,ANKRD1,COMP,NR1H2,CEP250,ATP6V1B2,RAB8A,NIPBL,NBL1,PPFIA1,PRKCD,TSLP,BAG3,PLA2G2A,TXN,MYOM1,CKAP5,HFE,ACACA,TGFB3,RXRA,RAB1B,FLNB,EFR3A,RPS26,FGG,SYNGR1,PANX3,TM9SF1,RAF1,MAGED1,WNT7A,RAE1,TPR,KIF1A,KLHL21,UBA52,UBC,TP53,YWHAZ,ESR1,SRC,TRAF6,AR,EGFR,SMAD3,SMAD2,YWHAG,CTNNB1,MAPK1,IKBKE,PIK3R1,FYN,MDM2,ABL1,AKT1,UBE2D2,RB1,PRKCA,ACTB,NFKB1,STAT3,MCC,PRKACA,UBB,MAPK3,PTPN11…
GO:BP	androgen receptor signaling pathway	GO:0030521	9.42E-17	16.02602241	59	618	24	17847	FHL2,EP300,HDAC1,AR,BRCA1,CTNNB1,RB1,NCOR1,SMARCA4,NCOR2,NCOA1,NCOA3,DAXX,SIRT1,HTATIP,ARRB2,NRIP1,HDAC6,PHB,PPARGC1A,RHOA,DDX17,DAB2,CDK7
GO:BP	movement of cell or subcellular component	GO:0006928	1.07E-16	15.97208124	2221	618	159	17847	ACTR1B,DNAH2,PTPN6,MYH6,EFNB1,FMNL3,NIPBL,NBL1,PRKCD,S100P,NR4A1,BAG3,TRIB1,BOC,TCAP,MYL2,PLXNB1,MYOCD,TUBB2B,TNNT3,SLC3A2,SAA2,CLDN5,FOLR1,TNNI2,CAP1,TNS3,MYBPC2,PIP5K1C,MYH7,ATP2A1,RAF1,SGK1,WNT7A,MIR210,MYBPC1,ACTA1,KIF1A,TNNC2,VEGFA,GRB2,SRC,EGFR,SMAD3,JUN,CTNNB1,MAPK1,PIK3R1,FYN,MDM2,ABL1,AKT1,PRKCA,ACTB,SP1,SMAD4,STAT3,MCC,UBB,MAPK3,PTPN11,PLCG1,LCK,SHC1,PML,TGFBR1,HSPA8,YWHAE,CRK,PPARG,SUM…
GO:BP	generation of neurons	GO:0048699	1.22E-16	15.91415154	1556	618	126	17847	ANKRD1,PMP22,EFNB1,RAB8A,NIPBL,NBL1,SIRT2,BOC,PLXNB1,TUBB2B,BHLHB3,FOLR1,RUNX2,RUNX1,SOX11,SGK1,CLN5,WNT7A,MIR210,VEGFA,TP53,YWHAZ,GRB2,SRC,EP300,HDAC1,EGFR,JUN,YWHAG,CTNNB1,MAPK1,PIK3R1,FYN,MDM2,ABL1,AKT1,RB1,PRKCA,ACTB,RELA,HDAC2,SMAD4,STAT3,UBB,RARA,MAPK3,PTPN11,PLCG1,SHC1,SIN3A,TGFBR1,YWHAE,CRK,NCOA1,GSK3B,PPARG,CEBPB,LYN,VIM,NCK1,JAK2,FLNA,CDK1,ERBB2,PIN1,HIF1A,PRKCZ,XRCC5,APP,SMURF1,THRB,CD…
GO:BP	negative regulation of phosphorylation	GO:0042326	1.26E-16	15.89864157	467	618	62	17847	PTPN6,STK38,SIRT2,PRKCD,TRIB1,MYOCD,MEN1,MIR210,CDKN2A,CTDSP2,MYC,JUN,YWHAG,ABL1,AKT1,RB1,SMAD4,STAT3,PRKDC,NCOR1,CBL,HDAC3,PPP2CA,NPM1,PPP2R1A,LYN,NCK1,HDAC4,PIN1,CDKN1A,PRKCZ,PLK1,SIRT1,SFN,APC,CAV1,ARRB1,CEBPA,ARRB2,DNCL1,PARK2,PAK2,MAPT,ILK,TSG101,IGF1R,PDPK1,CSK,KAT2B,ITCH,IRS2,PPARA,PHB,HSPB1,PSEN1,PPARGC1A,ATF3,RHOA,STRAP,PTPRC,CCNB1,GRB10
GO:BP	cellular macromolecule localization	GO:0070727	1.33E-16	15.87686064	1956	618	146	17847	TRAM1,CLTA,SAMM50,UBE2D3,CEP250,RAB8A,NIPBL,PPFIA1,PRKCD,BAG3,TXN,HFE,RAB1B,FLNB,EFR3A,RPS26,SYNGR1,TM9SF1,MAGED1,RAE1,TPR,KIF1A,KLHL21,UBA52,UBC,TP53,YWHAZ,ESR1,SRC,AR,EGFR,SMAD3,YWHAG,CTNNB1,MAPK1,PIK3R1,FYN,MDM2,AKT1,UBE2D2,RB1,ACTB,STAT3,PRKACA,UBB,PTPN11,YWHAQ,YWHAB,SIN3A,RPS27A,HDAC3,PARP1,PML,HSPA8,YWHAE,NPM1,NFKBIA,RUVBL2,GSK3B,SUMO1,TNFRSF1A,IKBKB,MAPK14,FLNA,CDK1,SYK,HSPA4,ERBB2,PIN1,CD…
GO:BP	muscle structure development	GO:0061061	1.59E-16	15.79808184	677	618	76	17847	TMEM119,ANKRD1,COMP,CSDA,MYH6,FHL2,SIRT2,NR4A1,RYR1,BOC,TCAP,MYL2,MYOCD,MYOM1,TNNT3,BHLHB3,UNC45A,RXRA,MYH11,FLNB,EPAS1,XIRP2,MYH7,FOS,SOX11,ACTA1,SYNPO2L,MYOZ1,VEGFA,EP300,SMAD3,CTNNB1,MAPK1,ABL1,AKT1,RB1,SMAD4,RARA,TGFBR1,HDAC4,MAPK14,CDK1,PIN1,SIRT1,CHUK,CDK9,CDC42,PAK1,ACTG1,CREB1,CAV1,HDAC5,MYOD1,BCL2,ARRB2,YY1,SRF,ILK,MAP3K5,MYH9,NOTCH1,PDGFRB,TCF3,KIT,ITGB1,PPARA,ATF3,CDK5,DNMT1,RHOA,TGFBR…
GO:BP	regulation of neuron death	GO:1901214	1.79E-16	15.747151	324	618	51	17847	AIMP2,TGFB3,FOS,TP53,JUN,IKBKG,CTNNB1,FYN,ABL1,AKT1,STAT3,UBB,CBL,PARP1,GSK3B,CEBPB,HDAC4,JAK2,DAXX,PIN1,HIF1A,SIRT1,ATM,CASP8,CDC42,CREB1,BCL2,ARRB1,ARRB2,SET,TNFRSF1B,PARK2,PTK2B,TBK1,MAPT,ATF2,ILK,MAP3K5,MYB,PDPK1,FASLG,PSMC1,ATF4,HRAS,PPARA,PSEN1,PPARGC1A,CDK5,RHOA,PRKCG,PIK3CA
GO:BP	positive regulation of protein serine/threonine kinase activity	GO:0071902	1.90E-16	15.72100673	337	618	52	17847	PSRC1,TGFB3,RAF1,MAGED1,UBA52,VEGFA,UBC,SRC,TRAF6,EGFR,IKBKG,MAPK1,AKT1,UBB,MAPK3,PTPN11,SHC1,RPS27A,TGFBR1,PPP2CA,CRK,MAPK14,JAK2,CDK1,DAXX,SYK,ERBB2,SIRT1,MAP3K14,PAK1,ARRB1,CCND1,INSR,PTK2B,TNIK,GH1,ILK,MAP3K5,PDGFRB,CSK,MAP2K1,DVL2,MAP3K7,HRAS,KIT,PSEN1,RHOA,IQGAP1,GADD45G,PTPRC,DAZAP2,CCNB1
GO:BP	regulation of cellular component biogenesis	GO:0044087	2.65E-16	15.57676668	946	618	92	17847	PSRC1,NPHP1,PPFIA1,SIRT2,PRKCD,ESPN,PSMC2,TGFB3,CLDN5,RAB1B,RUNX1,RAF1,WNT7A,SYNPO2L,TPR,VEGFA,TP53,ESR1,GRB2,SRC,EP300,SMAD3,BRCA1,PIK3R1,ABL1,RB1,PRKCA,SMAD4,PRKACA,PTPN11,PARP1,TGFBR1,HSPA8,NPM1,GSK3B,SUMO1,TNFRSF1A,IKBKB,NCK1,HDAC4,FLNA,SYK,PRKCZ,PLK1,XRCC5,APP,STUB1,TERF1,ATM,CDC42,PAK1,APC,HGS,ARF6,PSMC5,CREB1,TERF2,CAV1,HSP90AA1,THRA,HSPA1A,DDB1,ATR,PARK2,PTK2B,VCP,PRKCE,MAPT,SMC1L1,HDAC6,…
GO:BP	positive regulation of catabolic process	GO:0009896	3.72E-16	15.42948125	435	618	59	17847	TPCN1,RUFY4,PFKFB4,SIRT2,PRKCD,BAG3,TRIB1,PSMC2,MIR210,IKBKG,CSNK2A1,MDM2,AKT1,MAPK3,GSK3B,SUMO1,SUMO2,HIF1A,PLK1,SIRT1,APP,IRS1,STUB1,HTATIP,SMURF1,ATM,APC,SMURF2,CAV1,HSP90AA1,HSPA1A,CEBPA,CDC37,NEDD4,DDB1,TNFRSF1B,INSR,PARK2,PTK2B,TBK1,VCP,PRKCE,DISC1,HDAC6,HMGB1,PABPC1,ITCH,IRS2,MAP3K7,PSMC1,BARD1,PPARA,PSEN1,AXIN1,KDR,TAF1,DAB2,PSMC4,HTT
GO:BP	positive regulation of binding	GO:0051099	5.30E-16	15.27577128	182	618	38	17847	NIPBL,SIRT2,MYOCD,TXN,MEN1,HFE,CLDN5,CLN5,EP300,TRAF6,CTNNB1,ABL1,RB1,RARA,PARP1,PPP2CA,GSK3B,PPARG,JAK2,PIN1,EPB41,APP,DHX9,CDK9,TRIM28,ARF6,CAV1,ARRB1,PARK2,PPP2CB,GTF2B,ANXA2,HMGB1,MAPRE1,PSEN1,CDK5,TAF1,MET
GO:BP	anatomical structure formation involved in morphogenesis	GO:0048646	5.46E-16	15.26302455	1187	618	105	17847	COL2A1,PTPN6,ANKRD1,MYH6,PMP22,FMNL3,FHL2,NR4A1,WDR72,TCAP,MYL2,MYOM1,TNNT3,ADIPOR2,KLK4,MYH11,CLDN5,APLNR,FOLR1,EPAS1,VEZF1,RUNX1,SOX11,WNT7A,MIR210,ACTA1,SYNPO2L,MYOZ1,VEGFA,TP53,GRB2,EP300,TRAF6,HDAC1,AR,SMAD3,JUN,SMAD2,BRCA1,CTNNB1,MAPK1,ABL1,AKT1,PRKCA,SP1,HDAC2,SMAD4,STAT3,PRKACA,RARA,MAPK3,PTPN11,PRKDC,PLCG1,SHC1,PML,TGFBR1,STAT1,PPARG,SMAD1,MAPK14,SYK,ERBB2,HIF1A,SIRT1,ATM,CDC42,NFKB2,HGS…
GO:BP	cell growth	GO:0016049	5.56E-16	15.25478722	495	618	63	17847	PSRC1,MYL2,MYOCD,ADIPOR2,TGFB3,SGK1,CDKN2A,VEGFA,TP53,EGFR,SMAD3,CSNK2A1,CTNNB1,ABL1,AKT1,RB1,SMAD4,SIN3A,PML,SMARCA4,TGFBR1,PPP2CA,PPP2R1A,GSK3B,PPARG,ERBB2,PIN1,CDKN1A,PRKCZ,SIRT1,APP,SFN,SMURF1,ESR2,CDC42,RBBP7,PAK1,HSP90AA1,HSPA1A,BCL2,FN1,PARK2,YY1,PTK2B,DISC1,MAPT,HDAC6,SRF,ILK,ING1,TSG101,CCDC85B,TAF9,DNM2,ITCH,ITGB1,PPARA,PHB,CDK5,BCAR1,RHOA,TGFBR2,IQGAP1
GO:BP	negative regulation of cell cycle process	GO:0010948	5.57E-16	15.2538223	358	618	53	17847	DUX4,PSMC2,MEN1,RPS6KA2,CDKN2A,CDK2AP2,TPR,PSMA5,CTDSP2,TP53,EP300,BRCA1,MDM2,RB1,PCNA,PRKDC,PML,NPM1,CDK1,CDKN1A,PLK1,RBBP4,SFN,TERF1,CDK9,ATM,RBBP7,APC,PSMC5,TERF2,E2F1,CDK4,BCL2,CCND1,PSMA1,CHEK1,PSMD4,RBL1,PSMD2,PSMA3,RPA2,KAT2B,MAX,PSMC1,CBX5,PSMD13,CARM1,MDM4,PSMC6,BRD7,PSMA6,PSMC4,CCNB1
GO:BP	establishment of localization	GO:0051234	5.74E-16	15.24114813	5419	618	292	17847	SNRPF,ACTR1B,CLNS1A,TRAM1,TPCN1,CLTA,TMEM14C,SAMM50,PSRC1,LRRC8A,JSRP1,UBE2D3,SLC13A5,PTPN6,ANKRD1,ATP6AP2,COMP,NR1H2,ATP6V1B2,RAB8A,NIPBL,PPFIA1,PRKCD,TSLP,S100P,BAG3,RYR1,PSMC2,PLA2G2A,SLC38A10,CD320,TXN,MYOM1,CKAP5,ADIPOR2,HFE,COX17,ACACA,SLC3A2,TGFB3,RXRA,SLC25A22,CSN3,APLNR,FOLR1,SLC36A2,CHRNA4,COX7A2,RAB1B,HBG1,FNBP1,CAP1,RPS26,MB,GRIK4,FGG,SYNGR1,PIP5K1C,PANX3,DERA,CYTH2,SOX11,ATP2A1,RAF1,…
GO:BP	peptidyl-tyrosine phosphorylation	GO:0018108	6.26E-16	15.20335849	372	618	54	17847	PTPN6,PRKCD,TSLP,VEGFA,TP53,SRC,EGFR,FYN,ABL1,HDAC2,STAT3,MAPK3,PTPN11,LCK,CBL,SHC1,PPP2CA,PPP2R1A,TNFRSF1A,LYN,JAK2,SYK,ERBB2,PRKCZ,APP,CAV1,JAK1,ARRB2,INSR,PTK2B,PAK2,PRKCE,GH1,BTK,TSG101,IGF1R,PDGFRB,CSK,MAP2K1,ZAP70,DLG4,DVL2,TAL1,KIT,UNC119,PSEN1,IQGAP1,PTPRC,ERBB4,KDR,TNFRSF14,ITGB3,MET,JAK3
GO:BP	negative regulation of cellular protein metabolic process	GO:0032269	6.75E-16	15.17039583	1118	618	101	17847	SERPINA6,PTPN6,STK38,SIRT2,PRKCD,NR4A1,TRIB1,MYOCD,MEN1,HFE,RAF1,MIR210,CDKN2A,TPR,MYOZ1,CTDSP2,VEGFA,TP53,SRC,MYC,JUN,BRCA1,CSNK2A1,YWHAG,CTNNB1,FYN,MDM2,ABL1,AKT1,RB1,RELA,HDAC2,SMAD4,NFKB1,STAT3,RARA,PRKDC,NCOR1,CBL,YWHAB,SIN3A,HDAC3,PML,PPP2CA,YWHAE,NPM1,PPP2R1A,GSK3B,LYN,IKBKB,NCK1,PIN1,CDKN1A,PRKCZ,PLK1,SIRT1,CSNK2A2,APP,SFN,APC,CAV1,HSPA1A,ARRB1,CEBPA,ARRB2,SET,NCL,PARK2,PAK2,SMARCC1,PRKCE…
GO:BP	lymphocyte activation	GO:0046649	8.07E-16	15.09338421	744	618	79	17847	RORC,LRRC8A,PTPN6,EFNB1,PRKCD,PLA2G2A,CD320,CD8B,HFE,CHRNA4,RUNX2,RUNX1,SOX11,CDKN2A,TP53,GRB2,SRC,EP300,TRAF6,SMAD3,CTNNB1,PIK3R1,FYN,ABL1,AKT1,STAT3,RARA,PTPN11,PRKDC,LCK,CEBPB,LYN,NCK1,HDAC4,SYK,ERBB2,CDKN1A,PRKCZ,RIF1,ATM,CASP8,CDC42,PAK1,ZBTB16,VAV1,CAV1,HDAC5,BCL2,FANCA,PRKCB,MLH1,TNFRSF1B,AIRE,PTK2B,PAK2,TBK1,SRF,MYH9,MYB,BTK,PDPK1,CSK,BCL3,HMGB1,ZAP70,SOS1,TCF3,ITCH,IRS2,KIT,ITGB1,PSEN1,R…
GO:BP	peptidyl-tyrosine modification	GO:0018212	9.08E-16	15.04195259	375	618	54	17847	PTPN6,PRKCD,TSLP,VEGFA,TP53,SRC,EGFR,FYN,ABL1,HDAC2,STAT3,MAPK3,PTPN11,LCK,CBL,SHC1,PPP2CA,PPP2R1A,TNFRSF1A,LYN,JAK2,SYK,ERBB2,PRKCZ,APP,CAV1,JAK1,ARRB2,INSR,PTK2B,PAK2,PRKCE,GH1,BTK,TSG101,IGF1R,PDGFRB,CSK,MAP2K1,ZAP70,DLG4,DVL2,TAL1,KIT,UNC119,PSEN1,IQGAP1,PTPRC,ERBB4,KDR,TNFRSF14,ITGB3,MET,JAK3
GO:BP	protein localization	GO:0008104	1.01E-15	14.99480705	2863	618	186	17847	TRAM1,CLTA,SAMM50,UBE2D3,ANKRD1,COMP,CEP250,ATP6V1B2,RAB8A,NIPBL,NBL1,PPFIA1,PRKCD,TSLP,BAG3,TXN,MYOM1,HFE,TGFB3,RAB1B,FLNB,EFR3A,RPS26,FGG,SYNGR1,PANX3,TM9SF1,RAF1,MAGED1,WNT7A,RAE1,TPR,KIF1A,KLHL21,UBA52,UBC,TP53,YWHAZ,ESR1,SRC,TRAF6,AR,EGFR,SMAD3,SMAD2,YWHAG,CTNNB1,MAPK1,PIK3R1,FYN,MDM2,ABL1,AKT1,UBE2D2,RB1,PRKCA,ACTB,STAT3,MCC,PRKACA,UBB,MAPK3,PTPN11,YWHAQ,YWHAB,SIN3A,RPS27A,HDAC3,PARP1,PML,H…
GO:BP	neurogenesis	GO:0022008	1.06E-15	14.97443001	1656	618	129	17847	ANKRD1,PMP22,EFNB1,RAB8A,NIPBL,NBL1,SIRT2,BOC,PLXNB1,TUBB2B,BHLHB3,FOLR1,RUNX2,RUNX1,SOX11,SGK1,CLN5,WNT7A,MIR210,VEGFA,TP53,YWHAZ,GRB2,SRC,EP300,HDAC1,EGFR,JUN,YWHAG,CTNNB1,MAPK1,PIK3R1,FYN,MDM2,ABL1,AKT1,RB1,PRKCA,ACTB,RELA,HDAC2,SMAD4,STAT3,UBB,RARA,MAPK3,PTPN11,PLCG1,SHC1,SIN3A,TGFBR1,YWHAE,CRK,NCOA1,GSK3B,PPARG,CEBPB,LYN,VIM,NCK1,JAK2,FLNA,CDK1,ERBB2,PIN1,HIF1A,PRKCZ,XRCC5,APP,SMURF1,THRB,CD…
GO:BP	positive regulation of cell migration	GO:0030335	1.14E-15	14.94222209	546	618	66	17847	NIPBL,WNT7A,MIR210,VEGFA,SRC,EGFR,SMAD3,JUN,MAPK1,PIK3R1,MDM2,ABL1,AKT1,PRKCA,SP1,STAT3,MAPK3,PLCG1,TGFBR1,CRK,LYN,HDAC4,MAPK14,JAK2,FLNA,HIF1A,SIRT1,APP,ATM,PAK1,APC,ARF6,SMURF2,CAV1,HSPA5,BCL2,FN1,STAT5A,ETS1,INSR,PTK2B,PRKCE,HDAC6,ILK,IGF1R,NOTCH1,PDGFRB,PDPK1,HMGB1,IRS2,MAPRE1,HRAS,KIT,ITGB1,HSPB1,BCAR1,RHOA,TGFBR2,IQGAP1,PTPRC,KDR,TNFRSF14,DAB2,ITGB3,MET,FADD
GO:BP	wound healing	GO:0042060	1.15E-15	14.93970515	576	618	68	17847	NFE2,PTPN6,COMP,PRKCD,ADIPOR2,TGFB3,HBG1,FGG,RAF1,WNT7A,MYOZ1,YWHAZ,SRC,HDAC1,EGFR,SMAD3,SMAD2,MAPK1,PIK3R1,FYN,PRKCA,ACTB,HDAC2,PRKACA,MAPK3,PTPN11,LCK,TGFBR1,CRK,LYN,JAK2,FLNA,SYK,ERBB2,CDKN1A,HIF1A,CDC42,PAK1,ACTG1,VAV1,CAV1,MYOD1,ARRB1,FN1,ARRB2,PRKCB,ETS1,PRKCE,SRF,ILK,MAP3K5,MYH9,NOTCH1,PDGFRB,PDPK1,ANXA2,HRAS,CBX5,PPARA,HSPB1,RHOA,TGFBR2,PRKCG,ERBB4,PIK3CA,ITGB3,CCNB1,CFLAR
GO:BP	regulation of chromosome organization	GO:0033044	1.20E-15	14.92109442	351	618	52	17847	NIPBL,MYOCD,TOP2A,NEK6,TPR,NSMCE2,VEGFA,TP53,SRC,MYC,BRCA1,CTNNB1,MAPK1,RB1,SMAD4,MAPK3,SIN3A,PARP1,PML,RUVBL2,PLK1,SIRT1,XRCC5,RIF1,TERF1,CDK9,ATM,MAPK8,TRIM28,APC,TERF2,ARRB1,MCM2,SET,ATR,HNRPA1,CHEK1,MAPT,SETDB1,USP7,MYB,SFPQ,TCP1,TAL1,SMARCB1,PPARGC1A,DNMT1,CCT5,BRD7,LMNA,CCNB1,HMGA1
GO:BP	organic substance catabolic process	GO:1901575	1.40E-15	14.85512677	2216	618	156	17847	LPIN2,CLTA,GK5,UBE2D3,CSDA,PFKFB4,EXOSC1,SIRT2,PRKCD,BAG3,TRIB1,PSMC2,PLA2G2A,HFE,GCAT,VCAN,KLK4,UCHL3,RPS26,TMUB1,DERA,UBA1,CLN5,MIR210,FBXL20,CDKN2A,RAE1,TPR,PSMA5,SMOX,UBA52,UBC,TP53,YWHAZ,EGFR,SMAD3,CSNK2A1,CTNNB1,FYN,MDM2,AKT1,UBE2D2,PRKCA,RELA,UBE2I,STAT3,PRKACA,UBB,NCOR1,PLCG1,CBL,YWHAB,RPS27A,PML,HSPA8,PPP2CA,NPM1,PPP2R1A,GSK3B,EEF1A1,SUMO1,VIM,SUMO2,HDAC4,MAPK14,FLNA,CDK1,PIN1,HIF1A,PLK1…
GO:BP	regulation of small molecule metabolic process	GO:0062012	1.58E-15	14.80232594	434	618	58	17847	RORC,NR1H2,PFKFB4,PSMC2,CD320,ADIPOR2,ACACA,SCD,MIR210,RAE1,TPR,PSMA5,TP53,SRC,EP300,BRCA1,AKT1,SP1,NFKB1,STAT3,NCOR1,PARP1,NCOR2,GSK3B,PPARG,HDAC4,HIF1A,SIRT1,VDR,APP,IRS1,PSMC5,CAV1,PPP1CA,DDB1,NCOA2,INSR,PARK2,PTK2B,PSMA1,PSMD4,VCP,PRKCE,CLTC,PSMD2,PSMA3,KAT2B,IRS2,PSMC1,KIT,PPARA,PSMD13,PSEN1,PPARGC1A,PSMC6,PSMA6,PSMC4,NR1H3
GO:BP	regulation of cellular response to transforming growth factor beta stimulus	GO:1903844	1.64E-15	14.78437453	120	618	31	17847	MYOCD,MEN1,TGFB3,FOLR1,SOX11,UBA52,UBC,TP53,EP300,CREBBP,SMAD3,SMAD2,SMAD4,UBB,RPS27A,TGFBR1,PIN1,SIRT1,STUB1,SMURF1,SMURF2,CAV1,HSPA5,HSPA1A,SKIL,PDPK1,DNM2,TGFBR2,STRAP,DAB2,CFLAR
GO:BP	positive regulation of locomotion	GO:0040017	1.79E-15	14.74607179	596	618	69	17847	NIPBL,TUBB2B,WNT7A,MIR210,VEGFA,SRC,EGFR,SMAD3,JUN,MAPK1,PIK3R1,MDM2,ABL1,AKT1,PRKCA,SP1,STAT3,MAPK3,PLCG1,TGFBR1,CRK,LYN,HDAC4,MAPK14,JAK2,FLNA,HIF1A,SIRT1,APP,ATM,PAK1,APC,ARF6,SMURF2,CAV1,HSPA5,BCL2,FN1,DDB1,STAT5A,ETS1,INSR,PTK2B,PRKCE,HDAC6,ILK,TSG101,IGF1R,NOTCH1,PDGFRB,PDPK1,HMGB1,IRS2,MAPRE1,HRAS,KIT,ITGB1,HSPB1,BCAR1,RHOA,TGFBR2,IQGAP1,PTPRC,KDR,TNFRSF14,DAB2,ITGB3,MET,FADD
GO:BP	signal transduction by p53 class mediator	GO:0072331	1.87E-15	14.7287865	267	618	45	17847	ANKRD1,RFC4,TP53,EP300,HDAC1,BRCA1,CSNK2A1,MDM2,AKT1,HDAC2,UBB,PCNA,PML,TBP,MAPK14,CDK1,PIN1,CDKN1A,SIRT1,PRKAB1,RBBP4,CSNK2A2,HTATIP,SFN,ATM,RBBP7,E2F1,BCL2,CHD3,ATR,PARK2,CHEK1,NDRG1,BCL3,RPA2,PHLDA3,TAF9,CHD4,BARD1,CARM1,CDK5,MDM4,TAF1,BRD7,CCNB1
GO:BP	striated muscle tissue development	GO:0014706	2.01E-15	14.69575803	395	618	55	17847	ANKRD1,CSDA,MYH6,FHL2,SIRT2,NR4A1,RYR1,TCAP,MYL2,MYOCD,MYOM1,RXRA,MYH11,FLNB,XIRP2,MYH7,FOS,SOX11,ACTA1,MYOZ1,VEGFA,EP300,SMAD3,CTNNB1,MAPK1,RB1,SMAD4,RARA,TGFBR1,HDAC4,MAPK14,CDK1,PIN1,CDC42,PAK1,CREB1,CAV1,MYOD1,BCL2,ARRB2,YY1,SRF,NOTCH1,PDGFRB,ITGB1,PPARA,ATF3,CDK5,RHOA,TGFBR2,ERBB4,DDX17,LMNA,CCNB1,CFLAR
GO:BP	positive regulation of MAPK cascade	GO:0043410	2.03E-15	14.69159177	552	618	66	17847	PLA2G2A,TGFB3,FGG,RAF1,MAGED1,WNT7A,UBA52,VEGFA,UBC,SRC,TRAF6,AR,EGFR,JUN,IKBKG,CTNNB1,MAPK1,ABL1,PRKCA,UBB,MAPK3,PTPN11,SHC1,RPS27A,TGFBR1,CRK,MAPK14,JAK2,CDK1,DAXX,SYK,ERBB2,PRKCZ,MAP3K14,APP,CDC42,PAK1,ARRB1,ARRB2,INSR,PTK2B,PRKCE,TNIK,GH1,ILK,MAP3K5,IGF1R,NOTCH1,PDGFRB,CSK,PHB2,MAP2K1,HMGB1,DVL2,MAP3K7,HRAS,KIT,PHB,PSEN1,IQGAP1,GADD45G,PTPRC,ERBB4,AXIN1,KDR,CFLAR
GO:BP	DNA repair	GO:0006281	2.24E-15	14.65019788	553	618	66	17847	UBE2D3,NIPBL,MEN1,RFC4,CHRNA4,UBA52,NSMCE2,UBC,TP53,EP300,EGFR,BRCA1,ABL1,UBB,PCNA,PRKDC,RPS27A,PARP1,PML,H2AFX,NPM1,RUVBL2,MCM7,SUMO1,POLR2A,CDK1,SIRT1,XRCC5,MCM3,RIF1,DHX9,STUB1,HTATIP,CDK9,ATM,TRIM28,TERF2,COPS5,MCM2,FANCA,DDB1,MLH1,ATR,COPS6,MGMT,YY1,CHEK1,CDC5L,VCP,XRCC6,SMC1L1,USP7,MCM5,UBQLN4,CHAF1A,MCM6,SFPQ,HMGB1,RPA2,BARD1,CUL4A,FUS,PRKCG,UCHL5,CDK7,HMGA1
GO:BP	positive regulation of cellular component movement	GO:0051272	2.90E-15	14.53740201	586	618	68	17847	NIPBL,TUBB2B,ATP2A1,WNT7A,MIR210,VEGFA,SRC,EGFR,SMAD3,JUN,MAPK1,PIK3R1,MDM2,ABL1,AKT1,PRKCA,SP1,STAT3,MAPK3,PLCG1,TGFBR1,CRK,LYN,HDAC4,MAPK14,JAK2,FLNA,HIF1A,SIRT1,APP,ATM,PAK1,APC,ARF6,SMURF2,CAV1,HSPA5,BCL2,FN1,STAT5A,ETS1,INSR,PTK2B,PRKCE,HDAC6,ILK,IGF1R,NOTCH1,PDGFRB,PDPK1,HMGB1,IRS2,MAPRE1,HRAS,KIT,ITGB1,HSPB1,BCAR1,RHOA,TGFBR2,IQGAP1,PTPRC,KDR,TNFRSF14,DAB2,ITGB3,MET,FADD
GO:BP	muscle tissue development	GO:0060537	2.98E-15	14.52649303	412	618	56	17847	ANKRD1,CSDA,MYH6,FHL2,SIRT2,NR4A1,RYR1,TCAP,MYL2,MYOCD,MYOM1,RXRA,MYH11,FLNB,XIRP2,MYH7,FOS,SOX11,ACTA1,MYOZ1,VEGFA,EP300,SMAD3,CTNNB1,MAPK1,RB1,SMAD4,RARA,TGFBR1,HDAC4,MAPK14,CDK1,PIN1,CDC42,PAK1,CREB1,CAV1,MYOD1,BCL2,ARRB2,YY1,SRF,NOTCH1,PDGFRB,ITGB1,PPARA,PPARGC1A,ATF3,CDK5,RHOA,TGFBR2,ERBB4,DDX17,LMNA,CCNB1,CFLAR
GO:BP	T cell activation	GO:0042110	3.65E-15	14.43811164	470	618	60	17847	RORC,PTPN6,EFNB1,PLA2G2A,CD8B,HFE,RUNX2,RUNX1,CDKN2A,TP53,GRB2,SRC,TRAF6,SMAD3,CTNNB1,PIK3R1,FYN,ABL1,AKT1,STAT3,RARA,PTPN11,PRKDC,LCK,CEBPB,LYN,NCK1,SYK,ERBB2,PRKCZ,CASP8,CDC42,PAK1,ZBTB16,VAV1,CAV1,BCL2,FANCA,TNFRSF1B,AIRE,PAK2,SRF,MYH9,MYB,PDPK1,CSK,BCL3,HMGB1,ZAP70,SOS1,ITCH,KIT,PSEN1,RHOA,TGFBR2,PTPRC,TNFRSF14,PIK3CA,FADD,JAK3
GO:BP	plasma membrane bounded cell projection organization	GO:0120036	3.71E-15	14.43107709	1523	618	121	17847	ANKRD1,CEP250,NPHP1,PMP22,EFNB1,RAB8A,NBL1,PRKCD,BOC,ESPN,PLXNB1,TUBB2B,CKAP5,TGFB3,FOLR1,SGK1,WNT7A,MIR210,FGD5,VEGFA,GRB2,SRC,EP300,EGFR,JUN,YWHAG,CTNNB1,MAPK1,PIK3R1,FYN,MDM2,ABL1,AKT1,RB1,PRKCA,ACTB,HDAC2,SMAD4,PRKACA,UBB,MAPK3,PTPN11,PLCG1,SHC1,SIN3A,TGFBR1,YWHAE,CRK,PPP2R1A,GSK3B,LYN,VIM,TUBB,NCK1,HDAC4,JAK2,FLNA,CDK1,ERBB2,PRKCZ,PLK1,APP,SMURF1,CDC42,PAK1,APC,ARF6,CREB1,CAV1,HSP90AA1,HSPA5…
GO:BP	positive regulation of MAP kinase activity	GO:0043406	3.93E-15	14.40592038	260	618	44	17847	TGFB3,RAF1,MAGED1,UBA52,VEGFA,UBC,SRC,TRAF6,EGFR,IKBKG,MAPK1,UBB,MAPK3,PTPN11,SHC1,RPS27A,TGFBR1,CRK,MAPK14,JAK2,CDK1,DAXX,SYK,ERBB2,MAP3K14,PAK1,ARRB1,INSR,PTK2B,TNIK,GH1,ILK,MAP3K5,PDGFRB,CSK,MAP2K1,DVL2,MAP3K7,HRAS,KIT,PSEN1,IQGAP1,GADD45G,PTPRC
GO:BP	extrinsic apoptotic signaling pathway	GO:0097191	4.44E-15	14.35246086	226	618	41	17847	COL2A1,PHIP,BAG3,FGG,RAF1,SRC,AR,SMAD3,BRCA1,PIK3R1,FYN,AKT1,RELA,PML,TGFBR1,PPP2R1A,GSK3B,TNFRSF1A,JAK2,DAXX,CASP8,CAV1,HSPA1A,BCL2,PPP1CA,TNFRSF1B,PAK2,KRT18,SKIL,PDPK1,FASLG,ATF3,PPP2R1B,PTPRC,FAS,LMNA,BMPR1B,CFLAR,HTT,FADD,GABARAP
GO:BP	negative regulation of cellular component organization	GO:0051129	4.48E-15	14.34835185	733	618	77	17847	NR1H2,PMP22,PPFIA1,SIRT2,PRKCD,BAG3,ESPN,TOP2A,RPS6KA2,RAF1,SLN,MIR210,TPR,VEGFA,TP53,SRC,EP300,AR,BRCA1,FYN,MDM2,AKT1,HDAC2,SMAD4,SIN3A,PARP1,HSPA8,NPM1,GSK3B,TNFRSF1A,IKBKB,VIM,PRKCZ,PLK1,SIRT1,XRCC5,TERF1,ATM,CDC42,APC,ARF6,TERF2,CAV1,THRA,HSPA1A,YWHAH,MCM2,ARRB2,SET,TNFRSF1B,PARK2,HNRPA1,CHEK1,MAPT,HDAC6,SPTAN1,UBQLN4,NOTCH1,HMGB1,KAT2B,DNM2,DLG4,MAPRE1,SMARCB1,UNC119,PSEN1,PPARGC1A,CARM1,CDK…
GO:BP	cellular catabolic process	GO:0044248	4.68E-15	14.32982731	2287	618	158	17847	TPCN1,LPIN2,CLTA,GK5,UBE2D3,RUFY4,CSDA,PFKFB4,ATP6V1B2,RAB8A,EXOSC1,SIRT2,PRKCD,BAG3,TRIB1,PSMC2,HFE,GCAT,VCAN,UCHL3,RAB1B,HBG1,RPS26,TMUB1,DERA,TM9SF1,UBA1,FBXL20,CDKN2A,PSMA5,SMOX,UBA52,UBC,TP53,YWHAZ,SRC,EP300,IKBKG,CSNK2A1,CTNNB1,MDM2,ABL1,AKT1,UBE2D2,PRKCA,UBE2I,STAT3,PRKACA,UBB,MAPK3,PLCG1,CBL,YWHAB,RPS27A,PML,HSPA8,PPP2CA,NPM1,PPP2R1A,GSK3B,EEF1A1,SUMO1,VIM,SUMO2,MAPK14,CDK1,HIF1A,PLK1,SIR…
GO:BP	positive regulation of apoptotic signaling pathway	GO:2001235	4.98E-15	14.30272466	183	618	37	17847	PRKCD,MAGED1,MIR210,TP53,YWHAZ,SMAD3,YWHAG,UBB,LCK,YWHAQ,YWHAB,PML,TGFBR1,YWHAE,PPP2R1A,GSK3B,NCK1,JAK2,SIRT1,SFN,MAPK8,CASP8,CAV1,E2F1,YWHAH,BCL2,PPP1CA,PAK2,SKIL,SFPQ,SIAH1,ATF3,PPP2R1B,PTPRC,FAS,BMPR1B,FADD
GO:BP	positive regulation of cell adhesion	GO:0045785	5.10E-15	14.29245188	403	618	55	17847	PTPN6,EFNB1,FGG,RUNX1,VEGFA,GRB2,SRC,TRAF6,SMAD3,PIK3R1,FYN,ABL1,AKT1,PRKCA,RELA,RARA,PTPN11,LCK,CRK,GSK3B,LYN,NCK1,JAK2,FLNA,SYK,ERBB2,PRKCZ,ATM,CDC42,PAK1,ZBTB16,VAV1,CAV1,FN1,ETS1,PTK2B,PAK2,PRKCE,DISC1,ILK,MYB,PDPK1,CSK,HMGB1,ZAP70,DNM2,RHOA,TGFBR2,IQGAP1,PTPRC,KDR,TNFRSF14,PIK3CA,FADD,JAK3
GO:BP	organonitrogen compound catabolic process	GO:1901565	5.50E-15	14.25979242	1319	618	110	17847	CLTA,UBE2D3,SIRT2,PRKCD,BAG3,TRIB1,PSMC2,HFE,GCAT,VCAN,KLK4,UCHL3,TMUB1,DERA,UBA1,CLN5,FBXL20,CDKN2A,PSMA5,SMOX,UBA52,UBC,EGFR,SMAD3,CSNK2A1,CTNNB1,FYN,MDM2,AKT1,UBE2D2,RELA,UBE2I,PRKACA,UBB,CBL,RPS27A,PML,HSPA8,GSK3B,EEF1A1,SUMO1,SUMO2,FLNA,CDK1,PIN1,PLK1,SIRT1,CSNK2A2,STUB1,HTATIP,SMURF1,ATM,CASP8,APC,HGS,SMURF2,PSMC5,CAV1,HSP90AA1,HSPA5,HSPA1A,CDH1,XPO1,ARRB1,CEBPA,ARRB2,NEDD4,SQSTM1,DDB1,TNFR…
GO:BP	I-kappaB kinase/NF-kappaB signaling	GO:0007249	6.15E-15	14.21121768	275	618	45	17847	S100A4,NEK6,UBA52,UBC,ESR1,TRAF6,HDAC1,IKBKG,CTNNB1,IKBKE,FYN,ABL1,AKT1,RELA,UBE2I,NFKB1,UBB,RPS27A,STAT1,NFKBIA,TNFRSF1A,IKBKB,FLNA,SIRT1,MAP3K14,CHUK,CASP8,NFKB2,SQSTM1,PRKCB,TLE1,PARK2,BTRC,TBK1,PRKCE,EEF1D,BTK,PDPK1,BCL3,FASLG,MAP3K7,HSPB1,RHOA,CFLAR,FADD
GO:BP	cellular response to oxidative stress	GO:0034599	8.53E-15	14.06919286	302	618	47	17847	SIRT2,PRKCD,TXN,EPAS1,FOS,TP53,SRC,EGFR,JUN,CTNNB1,MAPK1,FYN,MDM2,ABL1,AKT1,RELA,HDAC2,PCNA,MAPK3,SIN3A,PARP1,PML,CRK,JAK2,CDK1,HIF1A,SIRT1,CHUK,MAPK8,HSPA1A,BCL2,ETS1,MGMT,PARK2,MAPT,HDAC6,MAP3K5,MYB,BTK,SFPQ,DNM2,ATF4,STK24,HSPB1,PPARGC1A,MET,CFLAR
GO:BP	tissue morphogenesis	GO:0048729	8.90E-15	14.05069147	677	618	73	17847	ANKRD1,MYH6,TCAP,PSMC2,MYL2,MYOM1,RXRA,FOLR1,XIRP2,MYH7,SOX11,MAGED1,WNT7A,ACTA1,PSMA5,VEGFA,ESR1,GRB2,SRC,TRAF6,MYC,AR,EGFR,SMAD3,SMAD2,CTNNB1,MDM2,ABL1,SMAD4,PRKACA,RARA,PML,TGFBR1,STAT1,FLNA,HIF1A,VDR,SMURF1,TRIM28,CDC42,PAK1,SMURF2,PSMC5,BCL2,PPP1CA,ARRB2,AIRE,PSMA1,PSMD4,BTRC,SRF,CLTC,ILK,PSMD2,NOTCH1,PHB2,PSMA3,SOS1,DVL2,PSMC1,TAL1,ITGB1,PSMD13,PSEN1,RHOA,TGFBR2,MDM4,PSMC6,PSMA6,DAB2,PSMC4,…
GO:BP	positive regulation of cell motility	GO:2000147	9.08E-15	14.04188603	568	618	66	17847	NIPBL,WNT7A,MIR210,VEGFA,SRC,EGFR,SMAD3,JUN,MAPK1,PIK3R1,MDM2,ABL1,AKT1,PRKCA,SP1,STAT3,MAPK3,PLCG1,TGFBR1,CRK,LYN,HDAC4,MAPK14,JAK2,FLNA,HIF1A,SIRT1,APP,ATM,PAK1,APC,ARF6,SMURF2,CAV1,HSPA5,BCL2,FN1,STAT5A,ETS1,INSR,PTK2B,PRKCE,HDAC6,ILK,IGF1R,NOTCH1,PDGFRB,PDPK1,HMGB1,IRS2,MAPRE1,HRAS,KIT,ITGB1,HSPB1,BCAR1,RHOA,TGFBR2,IQGAP1,PTPRC,KDR,TNFRSF14,DAB2,ITGB3,MET,FADD
GO:BP	regulation of transforming growth factor beta receptor signaling pathway	GO:0017015	9.92E-15	14.00341328	118	618	30	17847	MYOCD,MEN1,TGFB3,FOLR1,SOX11,UBA52,UBC,TP53,EP300,CREBBP,SMAD3,SMAD2,SMAD4,UBB,RPS27A,TGFBR1,PIN1,SIRT1,STUB1,SMURF1,SMURF2,CAV1,HSPA5,HSPA1A,SKIL,PDPK1,DNM2,TGFBR2,STRAP,DAB2
GO:BP	cell projection organization	GO:0030030	1.01E-14	13.99717208	1562	618	122	17847	PARVG,ANKRD1,CEP250,NPHP1,PMP22,EFNB1,RAB8A,NBL1,PRKCD,BOC,ESPN,PLXNB1,TUBB2B,CKAP5,TGFB3,FOLR1,SGK1,WNT7A,MIR210,FGD5,VEGFA,GRB2,SRC,EP300,EGFR,JUN,YWHAG,CTNNB1,MAPK1,PIK3R1,FYN,MDM2,ABL1,AKT1,RB1,PRKCA,ACTB,HDAC2,SMAD4,PRKACA,UBB,MAPK3,PTPN11,PLCG1,SHC1,SIN3A,TGFBR1,YWHAE,CRK,PPP2R1A,GSK3B,LYN,VIM,TUBB,NCK1,HDAC4,JAK2,FLNA,CDK1,ERBB2,PRKCZ,PLK1,APP,SMURF1,CDC42,PAK1,APC,ARF6,CREB1,CAV1,HSP90AA1…
GO:BP	positive regulation of cellular component biogenesis	GO:0044089	1.01E-14	13.99484828	524	618	63	17847	PSRC1,NPHP1,ESPN,PSMC2,TGFB3,CLDN5,WNT7A,SYNPO2L,TPR,VEGFA,TP53,ESR1,GRB2,SRC,SMAD3,ABL1,PRKCA,PARP1,TGFBR1,GSK3B,SUMO1,NCK1,HDAC4,FLNA,SYK,STUB1,TERF1,ATM,CDC42,PAK1,APC,HGS,ARF6,PSMC5,CREB1,CAV1,HSP90AA1,HSPA1A,DDB1,ATR,PTK2B,VCP,PRKCE,MAPT,HDAC6,SRF,DCTN1,TSG101,RPA2,DNM2,AKAP9,TAL1,MAPRE1,HRAS,KIT,CUL4A,RHOA,IQGAP1,PSMC6,KDR,PSMC4,MET,HTT
GO:BP	T cell receptor signaling pathway	GO:0050852	1.11E-14	13.95374277	198	618	38	17847	PTPN6,PSMC2,PSMA5,TRAF6,IKBKG,MAPK1,PIK3R1,FYN,ABL1,RELA,NFKB1,PLCG1,LCK,IKBKB,NCK1,CHUK,PAK1,PSMC5,PSMA1,PAK2,PSMD4,BTRC,PSMD2,PDPK1,CSK,PSMA3,ZAP70,MAP3K7,PSMC1,HRAS,PSMD13,PSEN1,BCAR1,PTPRC,PSMC6,PSMA6,PIK3CA,PSMC4
GO:BP	epithelium development	GO:0060429	1.19E-14	13.92356153	1295	618	108	17847	AIMP2,COL2A1,ATP6AP2,TCAP,PSMC2,MEN1,RXRA,CLDN5,FOLR1,C9ORF47,FLNB,VEZF1,RUNX1,SOX11,MAGED1,WNT7A,PSMA5,VEGFA,TP53,ESR1,GRB2,SRC,EP300,TRAF6,HDAC1,MYC,AR,EGFR,SMAD3,JUN,SMAD2,CTNNB1,MAPK1,ABL1,AKT1,RELA,HDAC2,SMAD4,PRKACA,RARA,PCNA,PRKDC,PML,STAT1,NCOA3,GSK3B,PPARG,CEBPB,TNFRSF1A,IKBKB,VIM,JAK2,FLNA,CDK1,CDKN1A,HIF1A,VDR,SFN,SMURF1,ATM,THRB,TRIM28,CDC42,PAK1,SMURF2,PSMC5,CREB1,CAV1,THRA,BCL2,PPP1…
GO:BP	regulation of transcription from RNA polymerase II promoter in response to hypoxia	GO:0061418	1.38E-14	13.86010226	78	618	25	17847	SIRT2,PSMC2,EPAS1,PSMA5,UBA52,VEGFA,UBC,TP53,EP300,CREBBP,UBB,VHL,RPS27A,HIF1A,PSMC5,PSMA1,PSMD4,PSMD2,NOTCH1,PSMA3,PSMC1,PSMD13,PSMC6,PSMA6,PSMC4
GO:BP	positive regulation of chromosome organization	GO:2001252	1.44E-14	13.84303377	178	618	36	17847	NIPBL,TPR,NSMCE2,VEGFA,TP53,BRCA1,CTNNB1,MAPK1,RB1,SMAD4,MAPK3,SIN3A,PML,RUVBL2,SIRT1,XRCC5,RIF1,TERF1,CDK9,ATM,TRIM28,ARRB1,ATR,HNRPA1,SETDB1,MYB,SFPQ,TCP1,TAL1,SMARCB1,PPARGC1A,DNMT1,CCT5,BRD7,LMNA,CCNB1
GO:BP	immune response-activating cell surface receptor signaling pathway	GO:0002429	1.45E-14	13.83720311	469	618	59	17847	PTPN6,PRKCD,PSMC2,RUNX1,RAF1,PSMA5,GRB2,SRC,EP300,CREBBP,TRAF6,IKBKG,MAPK1,PIK3R1,FYN,ABL1,ACTB,RELA,NFKB1,PRKACA,MAPK3,PLCG1,LCK,CRK,LYN,IKBKB,NCK1,SYK,CHUK,CDC42,PAK1,ACTG1,PSMC5,VAV1,HSP90AA1,BCL2,PRKCB,PSMA1,PAK2,PSMD4,BTRC,PRKCE,PSMD2,BTK,PDPK1,CSK,PSMA3,ZAP70,MAP3K7,PSMC1,HRAS,PSMD13,PSEN1,BCAR1,PTPRC,PSMC6,PSMA6,PIK3CA,PSMC4
GO:BP	cellular response to insulin stimulus	GO:0032869	1.51E-14	13.82181182	222	618	40	17847	LPIN2,ATP6V1B2,PHIP,RAB8A,PRKCD,GRB2,SRC,YWHAG,PIK3R1,AKT1,RELA,SP1,PTPN11,PRKDC,SHC1,PARP1,STAT1,GSK3B,PPARG,NCK1,PRKCZ,SIRT1,IRS1,PAK1,APC,HDAC5,CDK4,PRKCB,INSR,SMARCC1,RPS6KB1,IGF1R,PDPK1,SOS1,KAT2B,IRS2,BCAR1,PIK3CA,GRB10,CFLAR
GO:BP	intrinsic apoptotic signaling pathway	GO:0097193	1.59E-14	13.79983922	294	618	46	17847	CSDA,PRKCD,ATP2A1,TP53,SRC,EP300,HDAC1,BRCA1,IKBKE,PIK3R1,MDM2,ABL1,AKT1,UBB,PRKDC,LCK,PARP1,PML,CEBPB,TNFRSF1A,NCK1,JAK2,CDKN1A,HIF1A,SIRT1,SFN,ATM,CAV1,E2F1,HSPA1A,BCL2,MLH1,TNFRSF1B,PARK2,MAP3K5,SKIL,SFPQ,BCL3,PHLDA3,TAF9,SIAH1,ATF4,HRAS,STK24,CUL4A,HSPB1
GO:BP	cellular response to tumor necrosis factor	GO:0071356	1.82E-14	13.74022529	295	618	46	17847	ANKRD1,CSDA,PSMC2,PSMA5,BRCA1,IKBKG,MAPK1,AKT1,RELA,NFKB1,MAPK3,STAT1,NFKBIA,TNFRSF1A,IKBKB,HDAC4,MAPK14,JAK2,SYK,SIRT1,MAP3K14,CHUK,DHX9,CASP8,PSMC5,HSPA1A,MYOD1,CEBPA,TNFRSF1B,PARK2,PTK2B,PSMA1,PSMD4,KRT18,ILK,MAP3K5,PSMD2,PSMA3,FASLG,PSMC1,PSMD13,PPARGC1A,PSMC6,TNFRSF14,PSMA6,PSMC4
GO:BP	protein autophosphorylation	GO:0046777	1.93E-14	13.71506257	235	618	41	17847	NEK6,VEGFA,SRC,EGFR,JUN,FYN,ABL1,AKT1,PRKACA,MAPK3,LCK,GSK3B,LYN,JAK2,SYK,ERBB2,ATM,TRIM28,PAK1,CAV1,ATR,BCR,INSR,PTK2B,PAK2,TNIK,BTK,IGF1R,PDGFRB,PDPK1,CSK,ZAP70,STK24,KIT,CDK5,IQGAP1,PRKCG,PTPRC,ERBB4,KDR,TAF1
GO:BP	protein modification by small protein conjugation	GO:0032446	2.01E-14	13.69597522	922	618	87	17847	RNF220,AIMP2,UBE2D3,PSMC2,DCAF7,UCHL3,EPAS1,UBA1,FBXL20,CDKN2A,RAE1,TPR,PSMA5,KLHL21,UBA52,NSMCE2,UBC,TRAF6,BRCA1,CTNNB1,FYN,MDM2,ABL1,AKT1,UBE2D2,RELA,UBE2I,UBB,PCNA,VHL,PRKDC,CBL,RPS27A,HDAC3,TGFBR1,SUMO1,SUMO2,HDAC4,DAXX,PIN1,HIF1A,PLK1,SIRT1,STUB1,SMURF1,CDK9,TRIM28,CDC42,ZBTB16,SMURF2,PSMC5,CAV1,HSP90AA1,HSPA5,HSPA1A,BCL2,ARRB1,ARRB2,NEDD4,DDB1,PARK2,PSMA1,PSMD4,BTRC,VCP,PRKCE,HDAC6,USP7,PSM…
GO:BP	regulation of cellular response to growth factor stimulus	GO:0090287	2.09E-14	13.6808828	296	618	46	17847	HFE2,NBL1,MYOCD,MEN1,TGFB3,FOLR1,RUNX2,SOX11,UBA52,VEGFA,UBC,TP53,EP300,CREBBP,SMAD3,SMAD2,CTNNB1,ABL1,SMAD4,UBB,RPS27A,TGFBR1,PIN1,HIF1A,SIRT1,STUB1,SMURF1,HGS,SMURF2,CAV1,HSPA5,HSPA1A,NEDD4,PRKCB,ILK,SKIL,NOTCH1,PTP4A3,PDPK1,DNM2,TGFBR2,STRAP,DAB2,ITGB3,GRB10,CFLAR
GO:BP	positive regulation of DNA metabolic process	GO:0051054	2.23E-14	13.65150102	191	618	37	17847	PRKCD,RFC4,SRC,MYC,EGFR,BRCA1,CTNNB1,MAPK1,AKT1,PCNA,MAPK3,PRKDC,PARP1,PML,H2AFX,SIRT1,XRCC5,RIF1,DHX9,ATM,TRIM28,HSP90AA1,ARRB2,MLH1,ATR,MGMT,PTK2B,HNRPA1,USP7,PDGFRB,HMGB1,TCP1,PPARGC1A,FUS,CCT5,PRKCG,PTPRC
GO:BP	cellular protein-containing complex assembly	GO:0034622	2.41E-14	13.61770508	1103	618	97	17847	SNRPF,CLNS1A,CLTA,SAMM50,PSRC1,SIRT2,PRKCD,FOXRED1,TCAP,PSMC2,MYOM1,CKAP5,CENPN,MRPS11,COX17,MYH11,FGG,DHX30,TSPY2,UBA52,UBC,TP53,ESR1,GRB2,SRC,SMAD3,SMAD2,ABL1,RB1,SMAD4,UBB,RPS27A,PARP1,SMARCA4,H2AFX,NPM1,TBP,RUVBL2,MCM7,SMAD1,NCK1,JAK2,DAXX,HSPA4,RBBP4,MCM3,DHX9,STUB1,TERF1,ATM,RBBP7,PAK1,ARF6,PSMC5,CREB1,HSP90AA1,THRA,HSPA1A,MCM2,SET,SF3A2,DDB1,ATR,PARK2,PTK2B,PSMD4,PRKCE,MAPT,HDAC6,CLTC,DCTN…
GO:BP	activation of protein kinase activity	GO:0032147	2.54E-14	13.59516414	336	618	49	17847	PRKCD,TXN,TGFB3,RAF1,UBA52,VEGFA,UBC,SRC,TRAF6,EGFR,IKBKG,MAPK1,ABL1,AKT1,PRKACA,UBB,MAPK3,PTPN11,SHC1,RPS27A,TGFBR1,CRK,MAPK14,JAK2,CDK1,DAXX,SYK,PRKCZ,MAP3K14,PAK1,ARRB1,INSR,PTK2B,PAK2,TNIK,GH1,MAP3K5,PDPK1,MAP2K1,MAP3K7,STK24,KIT,PSEN1,TGFBR2,GADD45G,PTPRC,AXIN1,PIK3CA,ITGB3
GO:BP	neuron differentiation	GO:0030182	3.69E-14	13.43330392	1392	618	112	17847	ANKRD1,PMP22,EFNB1,RAB8A,NBL1,BOC,PLXNB1,TUBB2B,FOLR1,RUNX2,RUNX1,SOX11,SGK1,CLN5,WNT7A,MIR210,VEGFA,YWHAZ,GRB2,SRC,EP300,HDAC1,EGFR,JUN,YWHAG,CTNNB1,MAPK1,PIK3R1,FYN,MDM2,ABL1,AKT1,RB1,PRKCA,ACTB,HDAC2,SMAD4,STAT3,UBB,RARA,MAPK3,PTPN11,PLCG1,SHC1,SIN3A,TGFBR1,CRK,NCOA1,GSK3B,CEBPB,LYN,VIM,NCK1,JAK2,ERBB2,PIN1,HIF1A,PRKCZ,APP,SMURF1,THRB,CDC42,PAK1,ARF6,CREB1,HSP90AA1,HSPA5,HDAC5,YWHAH,CDH1,BCL2,…
GO:BP	negative regulation of developmental process	GO:0051093	3.80E-14	13.41972206	1056	618	94	17847	TMEM119,PRAMEF6,NR1H2,CSDA,PMP22,SIRT2,TRIB1,PRAMEF10,MYOCD,MEN1,BHLHB3,CLDN5,C9ORF47,RUNX1,SOX11,WNT7A,MIR210,CDKN2A,MYOZ1,VEGFA,TP53,MYC,EGFR,SMAD3,CTNNB1,MAPK1,PIK3R1,MDM2,ABL1,RB1,HDAC2,SMAD4,STAT3,PRKACA,RARA,PRKDC,PML,TGFBR1,PPP2CA,STAT1,NFKBIA,GSK3B,PPARG,LYN,VIM,HDAC4,ERBB2,CDKN1A,HIF1A,SIRT1,APP,THRB,PAK1,HGS,ZBTB16,ARF6,TERF2,CAV1,E2F1,HDAC5,YWHAH,BCL2,CCND1,BCR,PARK2,YY1,PTK2B,RBL1,MAP…
GO:BP	response to toxic substance	GO:0009636	4.16E-14	13.38141532	539	618	63	17847	MT1G,PRKCD,TXN,MT2A,CLDN5,CHRNA4,HBG1,ASNS,MB,FOS,UBA52,SRC,JUN,MAPK1,FYN,MDM2,ABL1,ACTB,RELA,HDAC2,NFKB1,STAT3,RARA,PCNA,MAPK3,CBL,STAT1,CRK,LYN,CDK1,DAXX,CDKN1A,SIRT1,CHUK,CASP8,CREB1,CDK4,CDH1,BCL2,CCND1,ETS1,MGMT,PARK2,PTK2B,HNRPA1,PRKCE,PPP2CB,HDAC6,SRF,SETDB1,MAP3K5,MYB,PDGFRB,DNM2,ATF4,STK24,PPARA,GSTK1,PPARGC1A,RHOA,KDR,CCNB1,MET
GO:BP	neuron projection development	GO:0031175	4.28E-14	13.36860983	1004	618	91	17847	ANKRD1,PMP22,EFNB1,RAB8A,NBL1,BOC,PLXNB1,TUBB2B,FOLR1,SGK1,WNT7A,MIR210,VEGFA,GRB2,SRC,EP300,EGFR,JUN,CTNNB1,MAPK1,PIK3R1,FYN,MDM2,ABL1,AKT1,RB1,PRKCA,ACTB,HDAC2,SMAD4,UBB,MAPK3,PTPN11,PLCG1,SHC1,SIN3A,CRK,GSK3B,LYN,VIM,NCK1,JAK2,ERBB2,PRKCZ,APP,SMURF1,CDC42,PAK1,ARF6,CREB1,HSP90AA1,HSPA5,YWHAH,CDH1,BCL2,FN1,NEDD4,SF3A2,PARK2,PTK2B,PAK2,DISC1,TNIK,MAPT,HDAC6,SRF,SPTAN1,ILK,SKIL,STRN,NOTCH1,MAP2K1…
GO:BP	regulation of RNA stability	GO:0043487	4.45E-14	13.35141577	184	618	36	17847	CSDA,EXOSC1,PRKCD,PSMC2,PSMA5,UBA52,UBC,YWHAZ,AKT1,PRKCA,UBB,YWHAB,RPS27A,HSPA8,NPM1,VIM,MAPK14,DHX9,PSMC5,E2F1,HSPA1A,XPO1,SET,TNFRSF1B,PSMA1,PSMD4,PSMD2,PSMA3,PABPC1,PSMC1,HSPB1,PSMD13,FUS,PSMC6,PSMA6,PSMC4
GO:BP	histone modification	GO:0016570	4.67E-14	13.330584	466	618	58	17847	NIPBL,SIRT2,PRKCD,MYOCD,MEN1,VEGFA,TP53,EP300,CREBBP,HDAC1,BRCA1,CTNNB1,PRKCA,HDAC2,SMAD4,MAPK3,SIN3A,HDAC3,NCOA1,NCOA3,RUVBL2,HDAC4,JAK2,CDK1,SIRT1,RIF1,HTATIP,CDK9,ATM,MAPK8,HDAC5,MYOD1,ARRB1,SET,DDB1,PRKCB,CHEK1,ATF2,HDAC6,SETDB1,USP7,GTF2B,MYB,SFPQ,TAF9,KAT2B,MAP3K7,SUV39H1,SMARCB1,PHB,PPARGC1A,CARM1,CDK5,DNMT1,TAF1,BRD7,LMNA,CCNB1
GO:BP	positive regulation of cellular catabolic process	GO:0031331	4.85E-14	13.31398106	368	618	51	17847	TPCN1,RUFY4,PFKFB4,SIRT2,PRKCD,BAG3,TRIB1,PSMC2,IKBKG,MDM2,AKT1,MAPK3,GSK3B,SUMO1,SUMO2,HIF1A,PLK1,SIRT1,APP,IRS1,STUB1,HTATIP,SMURF1,ATM,CAV1,HSP90AA1,HSPA1A,CEBPA,CDC37,TNFRSF1B,INSR,PARK2,PTK2B,TBK1,VCP,DISC1,HDAC6,HMGB1,PABPC1,ITCH,IRS2,MAP3K7,PSMC1,PPARA,PSEN1,AXIN1,KDR,TAF1,DAB2,PSMC4,HTT
GO:BP	regulation of proteolysis involved in cellular protein catabolic process	GO:1903050	5.10E-14	13.29262729	218	618	39	17847	SIRT2,TRIB1,PSMC2,HFE,CDKN2A,CSNK2A1,MDM2,AKT1,PRKACA,UBB,PML,GSK3B,SUMO1,SUMO2,PLK1,CSNK2A2,STUB1,SMURF1,CAV1,HSPA1A,CEBPA,PARK2,PTK2B,BTRC,VCP,SMARCC1,DISC1,USP7,UBQLN4,GABARAPL2,TAF9,PSMC1,PSEN1,PRKCG,AXIN1,UCHL5,TAF1,DAB2,PSMC4
GO:BP	regulation of cell development	GO:0060284	5.39E-14	13.26879474	972	618	89	17847	ANKRD1,PMP22,NIPBL,NBL1,SIRT2,TRIB1,PLXNB1,TUBB2B,BHLHB3,CLDN5,C9ORF47,FGG,SOX11,WNT7A,MIR210,VEGFA,TP53,EP300,HDAC1,YWHAG,CTNNB1,FYN,MDM2,ABL1,AKT1,RELA,HDAC2,SMAD4,STAT3,RARA,SIN3A,CRK,NCOA1,PPP2R1A,GSK3B,PPARG,TNFRSF1A,LYN,IKBKB,VIM,NCK1,HDAC4,FLNA,CDK1,PIN1,HIF1A,XRCC5,APP,SMURF1,THRB,CDC42,PAK1,ARF6,CREB1,E2F1,HSPA5,MYOD1,YWHAH,BCL2,FN1,NEDD4,SF3A2,TNFRSF1B,PARK2,YY1,PTK2B,DISC1,TNIK,MAPT,SR…
GO:BP	covalent chromatin modification	GO:0016569	7.93E-14	13.10057837	486	618	59	17847	NIPBL,SIRT2,PRKCD,MYOCD,MEN1,VEGFA,TP53,EP300,CREBBP,HDAC1,BRCA1,CTNNB1,PRKCA,HDAC2,SMAD4,MAPK3,SIN3A,HDAC3,NCOA1,NCOA3,RUVBL2,HDAC4,JAK2,CDK1,SIRT1,RIF1,HTATIP,CDK9,ATM,MAPK8,TRIM28,HDAC5,MYOD1,ARRB1,SET,DDB1,PRKCB,CHEK1,ATF2,HDAC6,SETDB1,USP7,GTF2B,MYB,SFPQ,TAF9,KAT2B,MAP3K7,SUV39H1,SMARCB1,PHB,PPARGC1A,CARM1,CDK5,DNMT1,TAF1,BRD7,LMNA,CCNB1
GO:BP	cell morphogenesis	GO:0000902	8.02E-14	13.09570391	1050	618	93	17847	PARVG,PTPN6,EFNB1,FMNL3,PHIP,RAB8A,NBL1,BOC,PLXNB1,ZMYM6,TUBB2B,ZNF135,FLNB,CAP1,FGG,SGK1,WNT7A,FGD5,VEGFA,GRB2,SRC,EP300,AR,EGFR,CTNNB1,MAPK1,PIK3R1,FYN,ABL1,RB1,PRKCA,ACTB,SMAD4,UBB,VHL,MAPK3,PTPN11,PLCG1,SHC1,SIN3A,CRK,GSK3B,MAPK14,FLNA,ERBB2,EPB41,PRKCZ,VDR,APP,SMURF1,CDC42,PAK1,CREB1,HSP90AA1,YWHAH,CDH1,BCL2,FN1,NEDD4,PARK2,PTK2B,DISC1,TNIK,MAPT,HDAC6,SRF,SPTAN1,ILK,MYH9,SKIL,ACTN1,NOTCH1,MA…
GO:BP	regulation of protein stability	GO:0031647	9.46E-14	13.02405299	282	618	44	17847	PRKCD,BAG3,CSN3,CDKN2A,TP53,SRC,EP300,CREBBP,SMAD3,MAPK1,PIK3R1,MDM2,VHL,PRKDC,HDAC3,HSPA8,SUMO1,FLNA,PIN1,CDKN1A,PLK1,SIRT1,STUB1,CREB1,HSP90AA1,HSPA1A,BCL2,CDC37,PARK2,BTRC,HDAC6,USP7,PHB2,TAF9,TCP1,SIAH1,PHB,PPARGC1A,CCT5,MDM4,TAF1,LMNA,CDK7,HTT
GO:BP	response to interleukin-1	GO:0070555	1.05E-13	12.97875638	211	618	38	17847	ANKRD1,PSMC2,FGG,PSMA5,UBA52,UBC,SRC,TRAF6,IKBKG,PRKCA,RELA,NFKB1,UBB,MAPK3,RPS27A,NFKBIA,CEBPB,IKBKB,HDAC4,HIF1A,APP,CHUK,PSMC5,SQSTM1,ETS1,YY1,PSMA1,PSMD4,BTRC,PSMD2,PSMA3,TAF9,MAP3K7,PSMC1,PSMD13,PSMC6,PSMA6,PSMC4
GO:BP	establishment of protein localization to organelle	GO:0072594	1.09E-13	12.96189659	565	618	64	17847	TRAM1,SAMM50,UBE2D3,NIPBL,PRKCD,BAG3,RPS26,TPR,UBA52,UBC,TP53,YWHAZ,SMAD3,YWHAG,MAPK1,PIK3R1,AKT1,UBE2D2,STAT3,UBB,YWHAQ,YWHAB,RPS27A,HDAC3,PML,HSPA8,YWHAE,NFKBIA,RUVBL2,MAPK14,FLNA,SYK,HSPA4,CDKN1A,CSNK2A2,SFN,SMURF1,TERF1,ATM,MAPK8,CASP8,TRIM28,HGS,HSP90AA1,E2F1,HSPA5,YWHAH,CDH1,BCL2,NEDD4,ATR,PARK2,KPNA2,MAPT,TSG101,PHB2,DNM2,TCP1,GSTK1,PSEN1,CCT5,RPS3A,LMNA,ITGB3
GO:BP	stress-activated protein kinase signaling cascade	GO:0031098	1.14E-13	12.9434544	296	618	45	17847	TRIB1,MEN1,WNT7A,UBA52,VEGFA,UBC,TRAF6,MYC,EGFR,IKBKG,MAPK1,AKT1,NFKB1,UBB,MAPK3,NCOR1,RPS27A,HDAC3,LYN,IKBKB,MAPK14,DAXX,SYK,APP,CHUK,MAPK8,CDC42,PAK1,COPS5,PARK2,PTK2B,BTRC,TNIK,MAP3K5,IGF1R,MAP2K1,HMGB1,DVL2,ITCH,MAP3K7,HRAS,RHOA,GADD45G,AXIN1,FAS
GO:BP	transport	GO:0006810	1.17E-13	12.93347252	5296	618	280	17847	SNRPF,ACTR1B,CLNS1A,TRAM1,TPCN1,CLTA,TMEM14C,SAMM50,LRRC8A,JSRP1,UBE2D3,SLC13A5,PTPN6,ANKRD1,ATP6AP2,COMP,NR1H2,ATP6V1B2,RAB8A,PPFIA1,PRKCD,TSLP,S100P,BAG3,RYR1,PSMC2,PLA2G2A,SLC38A10,CD320,TXN,MYOM1,CKAP5,ADIPOR2,HFE,COX17,ACACA,SLC3A2,TGFB3,RXRA,SLC25A22,CSN3,APLNR,FOLR1,SLC36A2,CHRNA4,COX7A2,RAB1B,HBG1,FNBP1,CAP1,RPS26,MB,GRIK4,FGG,SYNGR1,PIP5K1C,PANX3,DERA,CYTH2,SOX11,ATP2A1,RAF1,SGK1,CLN5,WN…
GO:BP	regulation of cell growth	GO:0001558	1.24E-13	12.90760962	418	618	54	17847	PSRC1,MYL2,MYOCD,ADIPOR2,SGK1,CDKN2A,VEGFA,TP53,EGFR,SMAD3,CSNK2A1,ABL1,AKT1,RB1,SMAD4,SIN3A,PML,SMARCA4,TGFBR1,PPP2CA,PPP2R1A,GSK3B,PPARG,ERBB2,PIN1,CDKN1A,SIRT1,SFN,SMURF1,ESR2,CDC42,RBBP7,PAK1,HSPA1A,BCL2,FN1,PARK2,YY1,PTK2B,DISC1,MAPT,SRF,ILK,ING1,TSG101,CCDC85B,TAF9,DNM2,ITCH,PPARA,PHB,CDK5,BCAR1,RHOA
GO:BP	muscle cell differentiation	GO:0042692	1.25E-13	12.90474388	390	618	52	17847	TMEM119,ANKRD1,COMP,MYH6,FHL2,RYR1,BOC,TCAP,MYL2,MYOCD,MYOM1,TNNT3,BHLHB3,RXRA,MYH11,ACTA1,SYNPO2L,MYOZ1,VEGFA,CTNNB1,ABL1,AKT1,RB1,SMAD4,RARA,HDAC4,MAPK14,CDK1,PIN1,SIRT1,CHUK,CDK9,CDC42,PAK1,ACTG1,HDAC5,MYOD1,BCL2,ARRB2,YY1,SRF,MYH9,NOTCH1,PDGFRB,TCF3,KIT,ITGB1,PPARA,DNMT1,LMNA,CCNB1,CFLAR
GO:BP	locomotion	GO:0040011	1.27E-13	12.89564574	1983	618	140	17847	CMTM8,DNAH2,PTPN6,EFNB1,FMNL3,NIPBL,NBL1,PRKCD,S100P,NR4A1,TRIB1,BOC,PLXNB1,MYOCD,TUBB2B,SLC3A2,SAA2,CLDN5,FOLR1,CAP1,TNS3,PIP5K1C,RAF1,SGK1,WNT7A,MIR210,VEGFA,GRB2,SRC,EP300,EGFR,SMAD3,JUN,CTNNB1,MAPK1,PIK3R1,FYN,MDM2,ABL1,AKT1,PRKCA,ACTB,SP1,SMAD4,STAT3,MCC,MAPK3,PTPN11,PLCG1,LCK,SHC1,PML,TGFBR1,YWHAE,CRK,PPARG,LYN,NCK1,HDAC4,MAPK14,JAK2,FLNA,CDK1,SYK,ERBB2,PIN1,HIF1A,PRKCZ,SIRT1,APP,ATM,TRIM28…
GO:BP	regulation of mRNA stability	GO:0043488	1.28E-13	12.89229835	179	618	35	17847	CSDA,EXOSC1,PRKCD,PSMC2,PSMA5,UBA52,UBC,YWHAZ,AKT1,PRKCA,UBB,YWHAB,RPS27A,HSPA8,NPM1,VIM,MAPK14,DHX9,PSMC5,E2F1,HSPA1A,XPO1,SET,PSMA1,PSMD4,PSMD2,PSMA3,PABPC1,PSMC1,HSPB1,PSMD13,FUS,PSMC6,PSMA6,PSMC4
GO:BP	tube morphogenesis	GO:0035239	1.43E-13	12.84413132	934	618	86	17847	COMP,FMNL3,NIPBL,NR4A1,TCAP,MYOCD,ADIPOR2,CLDN5,APLNR,FOLR1,EPAS1,VEZF1,RUNX1,SOX11,MAGED1,WNT7A,MIR210,VEGFA,ESR1,SRC,TRAF6,MYC,AR,EGFR,SMAD3,JUN,SMAD2,BRCA1,CTNNB1,ABL1,AKT1,PRKCA,SP1,SMAD4,STAT3,PRKACA,RARA,PLCG1,SHC1,PML,TGFBR1,STAT1,PPARG,SMAD1,MAPK14,SYK,ERBB2,HIF1A,SIRT1,VDR,CDC42,PAK1,HGS,CAV1,HDAC5,BCL2,PPP1CA,JAK1,FN1,PRKCB,ETS1,NCL,PTK2B,BTRC,ATF2,SRF,ILK,MYH9,NOTCH1,PDGFRB,PDPK1,PHB2,…
GO:BP	regulation of cell adhesion	GO:0030155	1.48E-13	12.83080694	696	618	72	17847	PTPN6,EFNB1,PRKCD,PLA2G2A,PLXNB1,MEN1,HFE,FGG,RUNX1,CDKN2A,VEGFA,GRB2,SRC,TRAF6,SMAD3,PIK3R1,FYN,ABL1,AKT1,PRKCA,RELA,RARA,PTPN11,LCK,PML,PPP2CA,CRK,PPP2R1A,GSK3B,CEBPB,LYN,NCK1,MAPK14,JAK2,FLNA,SYK,ERBB2,PRKCZ,ATM,CDC42,PAK1,ZBTB16,VAV1,CAV1,CDH1,BCL2,FN1,ETS1,PTK2B,PAK2,PRKCE,DISC1,SRF,ILK,MYB,NOTCH1,PDPK1,CSK,HMGB1,ZAP70,DNM2,ITCH,PPARA,RHOA,TGFBR2,IQGAP1,PTPRC,KDR,TNFRSF14,PIK3CA,FADD,JAK3
GO:BP	cell migration	GO:0016477	1.52E-13	12.81851327	1597	618	121	17847	PTPN6,EFNB1,FMNL3,NIPBL,NBL1,PRKCD,S100P,NR4A1,TRIB1,PLXNB1,MYOCD,TUBB2B,SLC3A2,SAA2,CLDN5,FOLR1,CAP1,TNS3,PIP5K1C,SGK1,WNT7A,MIR210,VEGFA,GRB2,SRC,EGFR,SMAD3,JUN,CTNNB1,MAPK1,PIK3R1,FYN,MDM2,ABL1,AKT1,PRKCA,SP1,STAT3,MCC,MAPK3,PTPN11,PLCG1,LCK,SHC1,PML,TGFBR1,YWHAE,CRK,PPARG,LYN,NCK1,HDAC4,MAPK14,JAK2,FLNA,CDK1,SYK,HIF1A,PRKCZ,SIRT1,APP,ATM,CDC42,PAK1,APC,ARF6,SMURF2,VAV1,CAV1,HSPA5,HDAC5,CDH1,B…
GO:BP	interleukin-1-mediated signaling pathway	GO:0070498	1.55E-13	12.80827841	102	618	27	17847	PSMC2,PSMA5,UBA52,UBC,TRAF6,IKBKG,RELA,NFKB1,UBB,MAPK3,RPS27A,NFKBIA,IKBKB,CHUK,PSMC5,SQSTM1,PSMA1,PSMD4,BTRC,PSMD2,PSMA3,MAP3K7,PSMC1,PSMD13,PSMC6,PSMA6,PSMC4
GO:BP	aging	GO:0007568	1.70E-13	12.77078322	325	618	47	17847	COMP,PRKCD,TGFB3,NEK6,FOS,CDKN2A,NSMCE2,TP53,GRB2,JUN,MAPK1,ABL1,AKT1,RELA,STAT3,MAPK3,PRKDC,SIN3A,PML,H2AFX,NPM1,MAPK14,CDK1,CDKN1A,SIRT1,APP,ATM,NFKB2,CREB1,TERF2,BCL2,ATR,TNFRSF1B,CHEK1,RBL1,SRF,ILK,PDGFRB,MAP2K1,HRAS,JUND,PSEN1,PPARGC1A,CARM1,TGFBR2,LMNA,HMGA1
GO:BP	cell cycle G2/M phase transition	GO:0044839	1.75E-13	12.7561334	274	618	43	17847	CEP250,PSMC2,CKAP5,CDKN2A,PSMA5,TP53,BRCA1,YWHAG,PRKACA,SIN3A,YWHAE,NPM1,PPP2R1A,TUBB,CDK1,CDKN1A,PLK1,APP,ATM,PSMC5,HSP90AA1,CDK4,CCND1,DNCL1,PSMA1,CHEK1,PSMD4,BTRC,DCTN1,PSMD2,KHDRBS1,PSMA3,DNM2,PSMC1,AKAP9,MAPRE1,PSMD13,TUBA4A,PSMC6,PSMA6,PSMC4,CDK7,CCNB1
GO:BP	regulation of signal transduction by p53 class mediator	GO:1901796	1.85E-13	12.7332624	181	618	35	17847	ANKRD1,RFC4,TP53,EP300,HDAC1,BRCA1,CSNK2A1,MDM2,AKT1,HDAC2,UBB,PML,TBP,MAPK14,PIN1,SIRT1,PRKAB1,RBBP4,CSNK2A2,HTATIP,ATM,RBBP7,BCL2,CHD3,ATR,PARK2,CHEK1,RPA2,TAF9,CHD4,BARD1,CDK5,MDM4,TAF1,BRD7
GO:BP	negative regulation of mitotic cell cycle	GO:0045930	1.86E-13	12.73107351	339	618	48	17847	PSMC2,TOP2A,CDKN2A,CDK2AP2,TPR,PSMA5,CTDSP2,TP53,EP300,EGFR,SMAD3,BRCA1,CTNNB1,MDM2,ABL1,RB1,PCNA,PRKDC,PML,CDK1,CDKN1A,PLK1,SFN,ATM,APC,PSMC5,E2F1,CDK4,BCL2,CCND1,PSMA1,CHEK1,PSMD4,RBL1,ATF2,PSMD2,PSMA3,RPA2,PSMC1,HRAS,PSMD13,CARM1,MDM4,PSMC6,BRD7,PSMA6,PSMC4,CCNB1
GO:BP	protein-DNA complex subunit organization	GO:0071824	1.92E-13	12.71568378	300	618	45	17847	ACTR6,NFE2,PSMC2,CENPN,TSPY2,UBA52,UBC,TP53,ESR1,MYC,RB1,UBB,RPS27A,PARP1,SMARCA4,H2AFX,NPM1,TBP,MCM7,DAXX,RBBP4,MCM3,TERF1,RBBP7,PSMC5,CREB1,THRA,MCM2,SET,DDB1,SMARCC1,MCM5,GTF2B,CHAF1A,MCM6,HMGB1,RPA2,SMARCB1,SMARCE1,CUL4A,PSMC6,TAF1,PSMC4,CDK7,HMGA1
GO:BP	regulation of cell cycle G2/M phase transition	GO:1902749	2.02E-13	12.69457485	215	618	38	17847	CEP250,PSMC2,CKAP5,CDKN2A,PSMA5,TP53,BRCA1,YWHAG,PRKACA,SIN3A,YWHAE,NPM1,PPP2R1A,TUBB,CDK1,PLK1,APP,ATM,PSMC5,HSP90AA1,CDK4,CCND1,DNCL1,PSMA1,CHEK1,PSMD4,DCTN1,PSMD2,PSMA3,PSMC1,AKAP9,MAPRE1,PSMD13,TUBA4A,PSMC6,PSMA6,PSMC4,CCNB1
GO:BP	defense response to other organism	GO:0098542	2.16E-13	12.66479169	1196	618	100	17847	UBE2D3,PTPN6,NR1H2,SIGLEC10,SIRT2,PRKCD,PSMC2,PLA2G2A,IFI44L,MT2A,FLNB,IRF5,FGG,RAF1,PSMA5,UBA52,UBC,TP53,ESR1,SRC,EP300,CREBBP,TRAF6,IKBKG,IKBKE,FYN,UBE2D2,RELA,NFKB1,PRKACA,UBB,MAPK3,PTPN11,PRKDC,SHC1,SIN3A,RPS27A,PML,STAT1,NFKBIA,CRK,PPARG,CEBPB,SUMO1,TNFRSF1A,LYN,IKBKB,VIM,TUBB,JAK2,FLNA,SYK,XRCC5,MAP3K14,APP,CHUK,DHX9,CASP8,TRIM28,CDC42,PAK1,ACTG1,PSMC5,VAV1,CAV1,HSPA1A,BCL2,JAK1,CDC37,ARRB2…
GO:BP	regulation of cellular protein catabolic process	GO:1903362	2.54E-13	12.59513616	252	618	41	17847	SIRT2,TRIB1,PSMC2,HFE,CDKN2A,CSNK2A1,MDM2,AKT1,PRKACA,UBB,PML,GSK3B,SUMO1,SUMO2,PLK1,CSNK2A2,STUB1,SMURF1,CAV1,HSP90AA1,HSPA1A,CEBPA,PARK2,PTK2B,BTRC,VCP,SMARCC1,DISC1,USP7,UBQLN4,ANXA2,GABARAPL2,TAF9,PSMC1,PSEN1,PRKCG,AXIN1,UCHL5,TAF1,DAB2,PSMC4
GO:BP	regulation of locomotion	GO:0040012	2.97E-13	12.52728577	1090	618	94	17847	NIPBL,NBL1,TRIB1,PLXNB1,MYOCD,TUBB2B,CLDN5,RAF1,SGK1,WNT7A,MIR210,VEGFA,SRC,EGFR,SMAD3,JUN,MAPK1,PIK3R1,MDM2,ABL1,AKT1,PRKCA,SP1,STAT3,MCC,MAPK3,PLCG1,PML,TGFBR1,CRK,PPARG,LYN,NCK1,HDAC4,MAPK14,JAK2,FLNA,ERBB2,PIN1,HIF1A,SIRT1,APP,ATM,TRIM28,PAK1,APC,ARF6,SMURF2,CAV1,HSPA5,HDAC5,CDH1,BCL2,FN1,DDB1,STAT5A,ETS1,BCR,AIRE,INSR,PTK2B,PRKCE,HDAC6,SRF,ILK,TSG101,IGF1R,NOTCH1,PDGFRB,PDPK1,HMGB1,IRS2,MAPR…
GO:BP	regulation of Wnt signaling pathway	GO:0030111	3.27E-13	12.4850772	371	618	50	17847	RNF220,ATP6AP2,PSMC2,FOLR1,RUNX1,PSMA5,ESR1,SRC,HDAC1,EGFR,SMAD3,CSNK2A1,CTNNB1,ABL1,NFKB1,MCC,SMARCA4,PPP2CA,RUVBL2,PPP2R1A,GSK3B,MAPK14,PIN1,APP,APC,SMURF2,PSMC5,CAV1,PPP1CA,TLE1,PARK2,PSMA1,PSMD4,BTRC,VCP,DISC1,ILK,PSMD2,NOTCH1,PSMA3,DVL2,PSMC1,PSMD13,PSEN1,AXIN1,PSMC6,PSMA6,DAB2,PSMC4,GRB10
GO:BP	regulation of animal organ morphogenesis	GO:2000027	3.39E-13	12.47001463	254	618	41	17847	PSMC2,RXRA,RUNX2,MAGED1,WNT7A,PSMA5,VEGFA,ESR1,MYC,AR,CTNNB1,ABL1,SMAD4,TGFBR1,STAT1,VDR,SMURF1,THRB,CDC42,SMURF2,PSMC5,BCL2,ARRB2,PSMA1,PSMD4,CLTC,PSMD2,NOTCH1,PHB2,PSMA3,DVL2,PSMC1,PSMD13,CARM1,RHOA,TGFBR2,PSMC6,PSMA6,DAB2,PSMC4,CFLAR
GO:BP	response to oxidative stress	GO:0006979	3.49E-13	12.45682778	457	618	56	17847	SIRT2,PRKCD,TXN,CHRNA4,EPAS1,MB,FOS,TP53,SRC,EGFR,JUN,CTNNB1,MAPK1,FYN,MDM2,ABL1,AKT1,RELA,SP1,HDAC2,PCNA,MAPK3,SIN3A,PARP1,PML,STAT1,CRK,JAK2,CDK1,HIF1A,SIRT1,APP,CHUK,MAPK8,HSPA1A,BCL2,ETS1,MGMT,PARK2,PTK2B,PPP2CB,MAPT,HDAC6,MAP3K5,MYB,BTK,PDGFRB,SFPQ,DNM2,ATF4,STK24,HSPB1,PSEN1,PPARGC1A,MET,CFLAR
GO:BP	response to tumor necrosis factor	GO:0034612	3.63E-13	12.44021129	318	618	46	17847	ANKRD1,CSDA,PSMC2,PSMA5,BRCA1,IKBKG,MAPK1,AKT1,RELA,NFKB1,MAPK3,STAT1,NFKBIA,TNFRSF1A,IKBKB,HDAC4,MAPK14,JAK2,SYK,SIRT1,MAP3K14,CHUK,DHX9,CASP8,PSMC5,HSPA1A,MYOD1,CEBPA,TNFRSF1B,PARK2,PTK2B,PSMA1,PSMD4,KRT18,ILK,MAP3K5,PSMD2,PSMA3,FASLG,PSMC1,PSMD13,PPARGC1A,PSMC6,TNFRSF14,PSMA6,PSMC4
GO:BP	cytokine production	GO:0001816	4.25E-13	12.37173736	811	618	78	17847	PTPN6,ATP6AP2,PRKCD,TSLP,IL17B,HFE,TGFB3,C9ORF47,IRF5,PANX3,RUNX1,SRC,EP300,CREBBP,TRAF6,SMAD3,BRCA1,CTNNB1,IKBKE,PIK3R1,ABL1,RELA,HDAC2,SMAD4,NFKB1,STAT3,RARA,MAPK3,PTPN11,PRKDC,PML,STAT1,CEBPB,LYN,MAPK14,JAK2,SYK,PIN1,HIF1A,PRKCZ,SIRT1,XRCC5,APP,CHUK,DHX9,HTATIP,CASP8,NFKB2,CREB1,HSPA1A,ARRB1,FN1,ARRB2,TNFRSF1B,AIRE,YY1,TBK1,XRCC6,ATF2,MYB,BTK,NOTCH1,CSK,BCL3,HMGB1,ITCH,MAP3K7,ATF4,HRAS,KIT,HSP…
GO:BP	G2/M transition of mitotic cell cycle	GO:0000086	4.51E-13	12.34620558	256	618	41	17847	CEP250,PSMC2,CKAP5,CDKN2A,PSMA5,BRCA1,YWHAG,PRKACA,SIN3A,YWHAE,PPP2R1A,TUBB,CDK1,CDKN1A,PLK1,APP,ATM,PSMC5,HSP90AA1,CDK4,CCND1,DNCL1,PSMA1,CHEK1,PSMD4,BTRC,DCTN1,PSMD2,KHDRBS1,PSMA3,DNM2,PSMC1,AKAP9,MAPRE1,PSMD13,TUBA4A,PSMC6,PSMA6,PSMC4,CDK7,CCNB1
GO:BP	negative regulation of cell cycle phase transition	GO:1901988	4.90E-13	12.30939822	269	618	42	17847	PSMC2,MEN1,CDKN2A,CDK2AP2,TPR,PSMA5,CTDSP2,TP53,EP300,BRCA1,MDM2,RB1,PCNA,PRKDC,PML,CDK1,CDKN1A,PLK1,SFN,ATM,APC,PSMC5,E2F1,CDK4,BCL2,CCND1,PSMA1,CHEK1,PSMD4,RBL1,PSMD2,PSMA3,RPA2,PSMC1,PSMD13,CARM1,MDM4,PSMC6,BRD7,PSMA6,PSMC4,CCNB1
GO:BP	circadian rhythm	GO:0007623	4.91E-13	12.30895811	209	618	37	17847	RORC,TOP2A,BHLHB3,MAGED1,TP53,EP300,HDAC1,EGFR,JUN,HDAC2,PRKDC,NCOR1,SIN3A,HDAC3,PML,GSK3B,PPARG,CDK1,SIRT1,MAPK8,CREB1,CDK4,PPP1CA,DDB1,NCOA2,BTRC,NRIP1,USP7,NR0B2,SFPQ,SUV39H1,ATF4,PPARA,JUND,PPARGC1A,PRKCG,NR1H3
GO:BP	response to insulin	GO:0032868	5.18E-13	12.28575974	282	618	43	17847	LPIN2,ATP6V1B2,PHIP,RAB8A,PRKCD,GRB2,SRC,YWHAG,PIK3R1,AKT1,RELA,SP1,PTPN11,PRKDC,SHC1,PARP1,STAT1,GSK3B,PPARG,LYN,NCK1,PRKCZ,SIRT1,IRS1,PAK1,APC,HDAC5,CDK4,PRKCB,INSR,SMARCC1,RPS6KB1,IGF1R,PDPK1,SOS1,KAT2B,MAX,IRS2,PPARA,BCAR1,PIK3CA,GRB10,CFLAR
GO:BP	platelet activation	GO:0030168	5.46E-13	12.26257476	155	618	32	17847	PTPN6,COMP,PRKCD,FGG,RAF1,YWHAZ,SRC,MAPK1,PIK3R1,FYN,PRKCA,ACTB,MAPK3,PTPN11,LCK,LYN,FLNA,SYK,ACTG1,VAV1,ARRB1,ARRB2,PRKCB,PRKCE,SRF,ILK,MYH9,PDPK1,HSPB1,PRKCG,PIK3CA,ITGB3
GO:BP	protein localization to nucleus	GO:0034504	5.62E-13	12.25002215	270	618	42	17847	PRKCD,BAG3,TXN,MAGED1,TPR,TP53,SRC,SMAD3,MAPK1,PIK3R1,FYN,MDM2,AKT1,STAT3,SIN3A,HDAC3,PARP1,PML,YWHAE,NFKBIA,GSK3B,SUMO1,MAPK14,FLNA,CDK1,SYK,PIN1,CDKN1A,PLK1,TRIM28,ZBTB16,CDH1,XPO1,KPNA2,PHB2,BCL3,TCP1,BARD1,PSEN1,CDK5,CCT5,LMNA
GO:BP	regulation of cell migration	GO:0030334	6.23E-13	12.20582832	957	618	86	17847	NIPBL,NBL1,TRIB1,PLXNB1,MYOCD,CLDN5,SGK1,WNT7A,MIR210,VEGFA,SRC,EGFR,SMAD3,JUN,MAPK1,PIK3R1,MDM2,ABL1,AKT1,PRKCA,SP1,STAT3,MCC,MAPK3,PLCG1,TGFBR1,CRK,PPARG,LYN,NCK1,HDAC4,MAPK14,JAK2,FLNA,HIF1A,SIRT1,APP,ATM,PAK1,APC,ARF6,SMURF2,CAV1,HSPA5,HDAC5,CDH1,BCL2,FN1,STAT5A,ETS1,BCR,AIRE,INSR,PTK2B,PRKCE,HDAC6,SRF,ILK,IGF1R,NOTCH1,PDGFRB,PDPK1,HMGB1,IRS2,MAPRE1,HRAS,STK24,KIT,ITGB1,HSPB1,PPARGC1A,CDK5,BC…
GO:BP	cellular response to external stimulus	GO:0071496	6.41E-13	12.1932216	336	618	47	17847	ANKRD1,BAG3,MYOCD,HFE,FOLR1,ASNS,FOS,TP53,EGFR,JUN,MAPK1,FYN,MDM2,AKT1,NFKB1,MAPK3,PTPN11,CBL,HSPA8,NCOA1,PPARG,TNFRSF1A,LYN,HDAC4,CDKN1A,SIRT1,VDR,MAP3K14,MAPK8,CASP8,HSPA5,MYOD1,BCL2,HNRPA1,CHEK1,SRF,MAP3K5,GABARAPL2,MAX,ATF4,STK24,ATF3,PTPRC,TAF1,FAS,FADD,GABARAP
GO:BP	cell motility	GO:0048870	7.08E-13	12.14992032	1752	618	127	17847	DNAH2,PTPN6,EFNB1,FMNL3,NIPBL,NBL1,PRKCD,S100P,NR4A1,TRIB1,PLXNB1,MYOCD,TUBB2B,SLC3A2,SAA2,CLDN5,FOLR1,CAP1,TNS3,PIP5K1C,RAF1,SGK1,WNT7A,MIR210,VEGFA,GRB2,SRC,EGFR,SMAD3,JUN,CTNNB1,MAPK1,PIK3R1,FYN,MDM2,ABL1,AKT1,PRKCA,ACTB,SP1,STAT3,MCC,MAPK3,PTPN11,PLCG1,LCK,SHC1,PML,TGFBR1,YWHAE,CRK,PPARG,LYN,NCK1,HDAC4,MAPK14,JAK2,FLNA,CDK1,SYK,ERBB2,PIN1,HIF1A,PRKCZ,SIRT1,APP,ATM,CDC42,PAK1,APC,ARF6,SMURF2,V…
GO:BP	localization of cell	GO:0051674	7.08E-13	12.14992032	1752	618	127	17847	DNAH2,PTPN6,EFNB1,FMNL3,NIPBL,NBL1,PRKCD,S100P,NR4A1,TRIB1,PLXNB1,MYOCD,TUBB2B,SLC3A2,SAA2,CLDN5,FOLR1,CAP1,TNS3,PIP5K1C,RAF1,SGK1,WNT7A,MIR210,VEGFA,GRB2,SRC,EGFR,SMAD3,JUN,CTNNB1,MAPK1,PIK3R1,FYN,MDM2,ABL1,AKT1,PRKCA,ACTB,SP1,STAT3,MCC,MAPK3,PTPN11,PLCG1,LCK,SHC1,PML,TGFBR1,YWHAE,CRK,PPARG,LYN,NCK1,HDAC4,MAPK14,JAK2,FLNA,CDK1,SYK,ERBB2,PIN1,HIF1A,PRKCZ,SIRT1,APP,ATM,CDC42,PAK1,APC,ARF6,SMURF2,V…
GO:BP	regulation of cellular component movement	GO:0051270	7.98E-13	12.09783641	1107	618	94	17847	NIPBL,NBL1,TRIB1,PLXNB1,MYOCD,TUBB2B,CLDN5,ATP2A1,RAF1,SGK1,WNT7A,MIR210,VEGFA,SRC,EGFR,SMAD3,JUN,MAPK1,PIK3R1,MDM2,ABL1,AKT1,PRKCA,SP1,STAT3,MCC,MAPK3,PLCG1,TGFBR1,CRK,PPARG,SUMO1,LYN,NCK1,HDAC4,MAPK14,JAK2,FLNA,ERBB2,PIN1,HIF1A,SIRT1,APP,ATM,PAK1,APC,ARF6,SMURF2,CAV1,HSPA5,HDAC5,CDH1,BCL2,FN1,STAT5A,ETS1,BCR,AIRE,INSR,PTK2B,PRKCE,HDAC6,SRF,ILK,ACTN1,IGF1R,NOTCH1,PDGFRB,PDPK1,HMGB1,IRS2,AKAP9,MA…
GO:BP	regulation of cytokine production	GO:0001817	9.19E-13	12.03666428	737	618	73	17847	PTPN6,ATP6AP2,TSLP,IL17B,HFE,TGFB3,C9ORF47,IRF5,PANX3,RUNX1,SRC,EP300,CREBBP,TRAF6,SMAD3,BRCA1,CTNNB1,IKBKE,PIK3R1,ABL1,RELA,HDAC2,SMAD4,NFKB1,STAT3,RARA,MAPK3,PTPN11,PRKDC,PML,STAT1,CEBPB,LYN,MAPK14,JAK2,SYK,PIN1,HIF1A,PRKCZ,XRCC5,APP,CHUK,DHX9,HTATIP,CASP8,NFKB2,CREB1,HSPA1A,ARRB1,FN1,ARRB2,TNFRSF1B,YY1,TBK1,XRCC6,ATF2,MYB,BTK,CSK,BCL3,HMGB1,ITCH,MAP3K7,ATF4,HRAS,HSPB1,PSEN1,IQGAP1,PTPRC,TNFRSF…
GO:BP	actin filament-based process	GO:0030029	9.32E-13	12.03075059	771	618	75	17847	PARVG,ANKRD1,NPHP1,MYH6,FMNL3,PPFIA1,PRKCD,TCAP,ESPN,MYL2,MYOM1,TNNT3,TGFB3,INF2,MYH11,TNNI2,FLNB,CAP1,XIRP2,MYBPC2,PIP5K1C,CYTH2,MYH7,ATP2A1,MYBPC1,ACTA1,SYNPO2L,MYOZ1,FGD5,TNNC2,GRB2,SRC,SMAD3,PIK3R1,ABL1,ACTB,SMAD4,SHC1,TGFBR1,CRK,SUMO1,IKBKB,VIM,NCK1,JAK2,FLNA,EPB41,CDC42,PAK1,ACTG1,ARF6,CAV1,BCL2,ARRB1,BCR,PARK2,PTK2B,PRKCE,TNIK,SRF,SPTAN1,ILK,MYH9,ACTN1,PDGFRB,PDPK1,AKAP9,HRAS,KIT,ITGB1,CDK…
GO:BP	protein ubiquitination	GO:0016567	9.47E-13	12.02356046	840	618	79	17847	RNF220,AIMP2,UBE2D3,PSMC2,DCAF7,UCHL3,EPAS1,UBA1,FBXL20,CDKN2A,PSMA5,KLHL21,UBA52,UBC,TRAF6,BRCA1,CTNNB1,FYN,MDM2,ABL1,AKT1,UBE2D2,UBB,PCNA,VHL,PRKDC,CBL,RPS27A,HDAC3,TGFBR1,DAXX,PIN1,HIF1A,PLK1,SIRT1,STUB1,SMURF1,CDK9,TRIM28,CDC42,ZBTB16,SMURF2,PSMC5,CAV1,HSP90AA1,HSPA5,HSPA1A,BCL2,ARRB1,ARRB2,NEDD4,DDB1,PARK2,PSMA1,PSMD4,BTRC,VCP,PRKCE,HDAC6,USP7,PSMD2,TSG101,PSMA3,ITCH,PSMC1,SIAH1,BARD1,CUL4A,…
GO:BP	innate immune response	GO:0045087	9.57E-13	12.01912023	1000	618	88	17847	UBE2D3,PTPN6,NR1H2,SIGLEC10,SIRT2,PRKCD,PSMC2,MT2A,FLNB,IRF5,FGG,RAF1,PSMA5,UBA52,UBC,TP53,ESR1,SRC,EP300,CREBBP,TRAF6,IKBKG,IKBKE,FYN,UBE2D2,RELA,NFKB1,PRKACA,UBB,PTPN11,PRKDC,SIN3A,RPS27A,PML,STAT1,NFKBIA,CRK,PPARG,SUMO1,LYN,IKBKB,VIM,TUBB,JAK2,SYK,XRCC5,APP,CHUK,DHX9,CASP8,TRIM28,CDC42,PAK1,ACTG1,PSMC5,VAV1,CAV1,HSPA1A,JAK1,CDC37,ARRB2,PSMA1,PAK2,PSMD4,BTRC,TBK1,PRKCE,XRCC6,MAP3K5,PSMD2,BTK,PD…
GO:BP	developmental growth	GO:0048589	9.89E-13	12.00484301	688	618	70	17847	COMP,CSDA,MYH6,NIPBL,RXRA,WNT7A,MYOZ1,VEGFA,TP53,ESR1,EP300,AR,SMAD3,SMAD2,CTNNB1,MAPK1,ABL1,AKT1,SMAD4,STAT3,RARA,PTPN11,PRKDC,SIN3A,TGFBR1,GSK3B,MAPK14,CDK1,PIN1,CDKN1A,PRKCZ,APP,SMURF1,ATM,TRIM28,PAK1,CREB1,HSP90AA1,MYOD1,CDK4,BCL2,FN1,STAT5A,INSR,PARK2,YY1,CHEK1,DISC1,MAPT,GH1,HDAC6,SRF,ILK,STAT5B,NOTCH1,PDGFRB,ANXA2,SOS1,DNM2,ITGB1,PPARA,CARM1,CDK5,TGFBR2,IQGAP1,ERBB4,PIK3CA,CCNB1,BMPR1B,CFL…
GO:BP	regulation of cell motility	GO:2000145	1.01E-12	11.99747504	1019	618	89	17847	NIPBL,NBL1,TRIB1,PLXNB1,MYOCD,CLDN5,RAF1,SGK1,WNT7A,MIR210,VEGFA,SRC,EGFR,SMAD3,JUN,MAPK1,PIK3R1,MDM2,ABL1,AKT1,PRKCA,SP1,STAT3,MCC,MAPK3,PLCG1,TGFBR1,CRK,PPARG,LYN,NCK1,HDAC4,MAPK14,JAK2,FLNA,ERBB2,PIN1,HIF1A,SIRT1,APP,ATM,PAK1,APC,ARF6,SMURF2,CAV1,HSPA5,HDAC5,CDH1,BCL2,FN1,STAT5A,ETS1,BCR,AIRE,INSR,PTK2B,PRKCE,HDAC6,SRF,ILK,IGF1R,NOTCH1,PDGFRB,PDPK1,HMGB1,IRS2,MAPRE1,HRAS,STK24,KIT,ITGB1,HSPB1,…
GO:BP	neuron development	GO:0048666	1.08E-12	11.96472336	1131	618	95	17847	ANKRD1,PMP22,EFNB1,RAB8A,NBL1,BOC,PLXNB1,TUBB2B,FOLR1,RUNX1,SGK1,CLN5,WNT7A,MIR210,VEGFA,YWHAZ,GRB2,SRC,EP300,EGFR,JUN,CTNNB1,MAPK1,PIK3R1,FYN,MDM2,ABL1,AKT1,RB1,PRKCA,ACTB,HDAC2,SMAD4,UBB,MAPK3,PTPN11,PLCG1,SHC1,SIN3A,CRK,GSK3B,LYN,VIM,NCK1,JAK2,ERBB2,PRKCZ,APP,SMURF1,THRB,CDC42,PAK1,ARF6,CREB1,HSP90AA1,HSPA5,YWHAH,CDH1,BCL2,FN1,NEDD4,SF3A2,PARK2,PTK2B,PAK2,DISC1,TNIK,MAPT,HDAC6,SRF,SPTAN1,ILK,S…
GO:BP	negative regulation of mitotic cell cycle phase transition	GO:1901991	1.10E-12	11.95929302	250	618	40	17847	PSMC2,CDKN2A,CDK2AP2,TPR,PSMA5,CTDSP2,TP53,EP300,BRCA1,MDM2,RB1,PCNA,PRKDC,PML,CDK1,CDKN1A,PLK1,SFN,ATM,APC,PSMC5,E2F1,CDK4,BCL2,CCND1,PSMA1,PSMD4,RBL1,PSMD2,PSMA3,RPA2,PSMC1,PSMD13,CARM1,MDM4,PSMC6,BRD7,PSMA6,PSMC4,CCNB1
GO:BP	neuron apoptotic process	GO:0051402	1.10E-12	11.95929302	250	618	40	17847	TGFB3,TP53,JUN,CTNNB1,FYN,RB1,PARP1,CEBPB,HDAC4,JAK2,PIN1,HIF1A,APP,ATM,THRB,CDC42,HSPA5,BCL2,ARRB1,ARRB2,SET,ATN1,PARK2,PTK2B,ATF2,ILK,MYB,PDPK1,FASLG,MAX,SIAH1,ATF4,HRAS,PSEN1,PPARGC1A,CDK5,RHOA,PRKCG,PIK3CA,FADD
GO:BP	stress-activated MAPK cascade	GO:0051403	1.14E-12	11.94465423	288	618	43	17847	TRIB1,MEN1,WNT7A,UBA52,VEGFA,UBC,TRAF6,MYC,EGFR,IKBKG,MAPK1,AKT1,NFKB1,UBB,MAPK3,NCOR1,RPS27A,HDAC3,IKBKB,MAPK14,DAXX,SYK,APP,CHUK,MAPK8,CDC42,PAK1,COPS5,PARK2,PTK2B,BTRC,TNIK,MAP3K5,IGF1R,MAP2K1,HMGB1,DVL2,ITCH,MAP3K7,HRAS,GADD45G,AXIN1,FAS
GO:BP	negative regulation of protein phosphorylation	GO:0001933	1.52E-12	11.8187117	428	618	53	17847	PTPN6,STK38,SIRT2,PRKCD,TRIB1,MYOCD,MEN1,CDKN2A,CTDSP2,MYC,JUN,YWHAG,ABL1,AKT1,RB1,SMAD4,PRKDC,NCOR1,CBL,HDAC3,PPP2CA,NPM1,PPP2R1A,LYN,NCK1,PIN1,CDKN1A,PRKCZ,PLK1,SIRT1,SFN,APC,CAV1,ARRB1,CEBPA,ARRB2,PARK2,PAK2,ILK,TSG101,IGF1R,PDPK1,CSK,KAT2B,ITCH,PHB,HSPB1,PSEN1,PPARGC1A,ATF3,STRAP,PTPRC,CCNB1
GO:BP	central nervous system development	GO:0007417	1.65E-12	11.78369773	1009	618	88	17847	COL2A1,NIPBL,SIRT2,BAG3,MEN1,COX17,VCAN,TACC1,SOX11,CLN5,WNT7A,DHX30,KIF1A,TP53,SRC,HDAC1,EGFR,CTNNB1,MAPK1,FYN,ABL1,AKT1,ACTB,HDAC2,STAT3,UBB,RARA,MAPK3,PTPN11,PRKDC,YWHAQ,SIN3A,YWHAE,H2AFX,CRK,NCOA1,GSK3B,PPARG,LYN,VIM,FLNA,ERBB2,HIF1A,NCOA6,XRCC5,CSNK2A2,APP,ATM,CDC42,PAK1,ZBTB16,CREB1,HSP90AA1,THRA,E2F1,ATXN1,HSPA5,YWHAH,CDH1,BCL2,ARRB2,ETS1,TNFRSF1B,ATN1,DNCL1,BCR,PARK2,XRCC6,DISC1,MAPT,SRF,…
GO:BP	cellular response to environmental stimulus	GO:0104004	2.46E-12	11.60913751	334	618	46	17847	ANKRD1,CSDA,NIPBL,BAG3,TP53,GRB2,EP300,CREBBP,MYC,EGFR,PIK3R1,MDM2,AKT1,NFKB1,PCNA,MAPK3,PTPN11,PARP1,H2AFX,NPM1,RUVBL2,TNFRSF1A,HDAC4,MAPK14,CDKN1A,SIRT1,XRCC5,MAP3K14,ATM,MAPK8,CASP8,HSPA5,NEDD4,DDB1,ATR,MGMT,YY1,CHEK1,XRCC6,EEF1D,DNM2,ATF4,HRAS,TAF1,FAS,FADD
GO:BP	cellular response to abiotic stimulus	GO:0071214	2.46E-12	11.60913751	334	618	46	17847	ANKRD1,CSDA,NIPBL,BAG3,TP53,GRB2,EP300,CREBBP,MYC,EGFR,PIK3R1,MDM2,AKT1,NFKB1,PCNA,MAPK3,PTPN11,PARP1,H2AFX,NPM1,RUVBL2,TNFRSF1A,HDAC4,MAPK14,CDKN1A,SIRT1,XRCC5,MAP3K14,ATM,MAPK8,CASP8,HSPA5,NEDD4,DDB1,ATR,MGMT,YY1,CHEK1,XRCC6,EEF1D,DNM2,ATF4,HRAS,TAF1,FAS,FADD
GO:BP	striated muscle cell differentiation	GO:0051146	2.76E-12	11.55868751	295	618	43	17847	TMEM119,ANKRD1,COMP,MYH6,FHL2,RYR1,TCAP,MYL2,MYOCD,MYOM1,TNNT3,BHLHB3,RXRA,MYH11,ACTA1,SYNPO2L,MYOZ1,VEGFA,AKT1,RB1,SMAD4,RARA,HDAC4,MAPK14,CDK1,PIN1,CHUK,PAK1,ACTG1,HDAC5,MYOD1,BCL2,ARRB2,YY1,SRF,MYH9,NOTCH1,PDGFRB,ITGB1,PPARA,LMNA,CCNB1,CFLAR
GO:BP	regulation of ubiquitin-dependent protein catabolic process	GO:2000058	2.82E-12	11.5500221	153	618	31	17847	SIRT2,TRIB1,HFE,CDKN2A,CSNK2A1,MDM2,AKT1,PML,GSK3B,SUMO1,SUMO2,PLK1,CSNK2A2,STUB1,SMURF1,CAV1,HSPA1A,CEBPA,PARK2,PTK2B,VCP,SMARCC1,DISC1,USP7,UBQLN4,TAF9,PSEN1,AXIN1,UCHL5,TAF1,DAB2
GO:BP	head development	GO:0060322	2.83E-12	11.54799584	787	618	75	17847	COL2A1,ATP6AP2,NIPBL,SIRT2,BAG3,MEN1,COX17,TGFB3,CLDN5,TACC1,RAF1,CLN5,WNT7A,KIF1A,TP53,SRC,EP300,HDAC1,EGFR,CTNNB1,MAPK1,FYN,ABL1,ACTB,UBB,RARA,MAPK3,PTPN11,PRKDC,YWHAQ,SIN3A,YWHAE,H2AFX,CRK,NCOA1,GSK3B,FLNA,HIF1A,NCOA6,XRCC5,CSNK2A2,APP,ATM,CDC42,PAK1,CREB1,THRA,E2F1,ATXN1,HSPA5,YWHAH,CDH1,BCL2,ARRB2,ETS1,DNCL1,BCR,XRCC6,DISC1,SRF,NOTCH1,CSK,MAP2K1,SNRPB,SOS1,IRS2,ITGB1,PSEN1,PPARGC1A,CDK5,RHOA…
GO:BP	regulation of T cell activation	GO:0050863	2.93E-12	11.53289696	322	618	45	17847	PTPN6,EFNB1,PLA2G2A,HFE,RUNX1,CDKN2A,GRB2,SRC,TRAF6,CTNNB1,PIK3R1,FYN,ABL1,AKT1,RARA,PTPN11,LCK,CEBPB,LYN,NCK1,SYK,ERBB2,PRKCZ,CDC42,PAK1,ZBTB16,VAV1,CAV1,FANCA,TNFRSF1B,PAK2,MYB,PDPK1,CSK,HMGB1,ZAP70,SOS1,ITCH,RHOA,TGFBR2,PTPRC,TNFRSF14,PIK3CA,FADD,JAK3
GO:BP	regulation of peptidyl-tyrosine phosphorylation	GO:0050730	3.33E-12	11.47771954	258	618	40	17847	PTPN6,PRKCD,TSLP,VEGFA,TP53,SRC,EGFR,FYN,ABL1,HDAC2,STAT3,PTPN11,CBL,SHC1,PPP2CA,PPP2R1A,TNFRSF1A,LYN,JAK2,SYK,PRKCZ,APP,CAV1,ARRB2,PTK2B,PAK2,PRKCE,GH1,TSG101,DLG4,DVL2,TAL1,KIT,UNC119,PSEN1,IQGAP1,PTPRC,ERBB4,TNFRSF14,ITGB3
GO:BP	regulation of G2/M transition of mitotic cell cycle	GO:0010389	3.40E-12	11.46855383	198	618	35	17847	CEP250,PSMC2,CKAP5,CDKN2A,PSMA5,BRCA1,YWHAG,PRKACA,SIN3A,YWHAE,PPP2R1A,TUBB,CDK1,PLK1,APP,ATM,PSMC5,HSP90AA1,CDK4,CCND1,DNCL1,PSMA1,PSMD4,DCTN1,PSMD2,PSMA3,PSMC1,AKAP9,MAPRE1,PSMD13,TUBA4A,PSMC6,PSMA6,PSMC4,CCNB1
GO:BP	mRNA metabolic process	GO:0016071	3.54E-12	11.45131212	860	618	79	17847	SNRPF,CLNS1A,CSDA,EXOSC1,PRKCD,SNRPN,PSMC2,RPS26,RALY,PSMA5,UBA52,UBC,TP53,YWHAZ,AKT1,PRKCA,STAT3,PRKACA,UBB,YWHAB,RPS27A,HSPA8,PPP2CA,NPM1,PPP2R1A,VIM,SRRM2,POLR2A,MAPK14,FLNA,HIF1A,APP,DHX9,SRRM1,RNPS1,CDK9,ATM,PSMC5,E2F1,HSPA1A,MYOD1,XPO1,SET,SF3A2,MLH1,NCL,PSMA1,HNRPA1,PSMD4,CDC5L,SRF,DDX20,PSMD2,PCBP1,KHDRBS1,SFPQ,PSMA3,SNRPB,PABPC1,PSMC1,GTF2F1,ATF4,BARD1,HSPB1,PSMD13,PPARGC1A,FUS,STRAP,CD2…
GO:BP	nuclear transport	GO:0051169	4.00E-12	11.39805433	352	618	47	17847	SNRPF,PRKCD,BAG3,TXN,RAE1,TPR,TP53,SMAD3,MAPK1,PIK3R1,MDM2,AKT1,STAT3,PRKACA,PTPN11,HDAC3,PML,YWHAE,NPM1,NFKBIA,GSK3B,MAPK14,FLNA,SYK,CDKN1A,DHX9,SFN,SRRM1,RNPS1,SMURF1,TRIM28,ATXN1,CDH1,XPO1,NEDD4,KPNA2,HNRPA1,DDX20,PHB2,KHDRBS1,SNRPB,BARD1,PSEN1,CDK5,LMNA,HMGA1,SNRPD2
GO:BP	negative regulation of cellular response to transforming growth factor beta stimulus	GO:1903845	4.36E-12	11.36058107	80	618	23	17847	TGFB3,UBA52,UBC,TP53,SMAD3,SMAD2,UBB,RPS27A,TGFBR1,PIN1,SIRT1,STUB1,SMURF1,SMURF2,CAV1,HSPA5,HSPA1A,SKIL,PDPK1,DNM2,TGFBR2,STRAP,CFLAR
GO:BP	negative regulation of cell differentiation	GO:0045596	4.37E-12	11.35940248	759	618	73	17847	TMEM119,PRAMEF6,NR1H2,PMP22,SIRT2,TRIB1,PRAMEF10,MYOCD,MEN1,BHLHB3,C9ORF47,RUNX1,SOX11,WNT7A,MIR210,CDKN2A,VEGFA,TP53,MYC,EGFR,SMAD3,CTNNB1,MAPK1,PIK3R1,MDM2,RB1,HDAC2,SMAD4,STAT3,RARA,TGFBR1,PPP2CA,STAT1,NFKBIA,GSK3B,PPARG,LYN,VIM,HDAC4,ERBB2,SIRT1,APP,THRB,PAK1,ZBTB16,ARF6,CAV1,E2F1,HDAC5,YWHAH,BCL2,CCND1,YY1,PTK2B,SKIL,NOTCH1,HMGB1,CCDC85B,TAL1,ITGB1,PPARA,CUL4A,PSEN1,CARM1,CDK5,DNMT1,RHOA,STR…
GO:BP	negative regulation of transferase activity	GO:0051348	4.59E-12	11.33865064	286	618	42	17847	PTPN6,STK38,PRKCD,TRIB1,MYOCD,MEN1,CDKN2A,TP53,SRC,YWHAG,ABL1,AKT1,RB1,CBL,PPP2CA,NPM1,PPP2R1A,GSK3B,PPARG,LYN,NCK1,CDKN1A,PLK1,SIRT1,SFN,TERF1,APC,CAV1,CEBPA,PARK2,PAK2,MAPT,ILK,TSG101,IGF1R,PDPK1,CSK,KAT2B,IRS2,HSPB1,PSEN1,PTPRC
GO:BP	regulation of cell-cell adhesion	GO:0022407	5.07E-12	11.29481362	411	618	51	17847	PTPN6,EFNB1,PRKCD,PLA2G2A,HFE,FGG,RUNX1,CDKN2A,VEGFA,GRB2,SRC,TRAF6,PIK3R1,FYN,ABL1,AKT1,PRKCA,RELA,RARA,PTPN11,LCK,CEBPB,LYN,NCK1,MAPK14,JAK2,SYK,ERBB2,PRKCZ,CDC42,PAK1,ZBTB16,VAV1,CAV1,CDH1,ETS1,PAK2,MYB,PDPK1,CSK,HMGB1,ZAP70,ITCH,PPARA,RHOA,TGFBR2,PTPRC,TNFRSF14,PIK3CA,FADD,JAK3
GO:BP	positive regulation of nucleocytoplasmic transport	GO:0046824	5.29E-12	11.27671267	65	618	21	17847	PRKCD,BAG3,TPR,TP53,SMAD3,MAPK1,PIK3R1,MDM2,PRKACA,HDAC3,YWHAE,GSK3B,MAPK14,FLNA,DHX9,SFN,TRIM28,CDH1,NEDD4,KHDRBS1,PSEN1
GO:BP	regulation of mRNA catabolic process	GO:0061013	5.49E-12	11.26021908	201	618	35	17847	CSDA,EXOSC1,PRKCD,PSMC2,PSMA5,UBA52,UBC,YWHAZ,AKT1,PRKCA,UBB,YWHAB,RPS27A,HSPA8,NPM1,VIM,MAPK14,DHX9,PSMC5,E2F1,HSPA1A,XPO1,SET,PSMA1,PSMD4,PSMD2,PSMA3,PABPC1,PSMC1,HSPB1,PSMD13,FUS,PSMC6,PSMA6,PSMC4
GO:BP	lymphocyte costimulation	GO:0031294	5.83E-12	11.23417287	58	618	20	17847	PTPN6,EFNB1,CD320,GRB2,SRC,PIK3R1,FYN,AKT1,PTPN11,LCK,LYN,CDC42,PAK1,VAV1,CAV1,PAK2,PDPK1,CSK,TNFRSF14,PIK3CA
GO:BP	response to mechanical stimulus	GO:0009612	6.68E-12	11.17545547	214	618	36	17847	ANKRD1,BAG3,TCAP,ASNS,FOS,RAF1,ACTA1,SRC,EGFR,JUN,FYN,AKT1,RELA,NFKB1,MAPK3,PTPN11,STAT1,NFKBIA,PPARG,TNFRSF1A,HDAC4,MAPK14,MAP3K14,MAPK8,CASP8,ETS1,PTK2B,CHEK1,KIT,JUND,RHOA,TGFBR2,FAS,CCNB1,HTT,FADD
GO:BP	autophagy	GO:0006914	6.82E-12	11.16630174	504	618	57	17847	TPCN1,RUFY4,ATP6V1B2,RAB8A,SIRT2,BAG3,RAB1B,TM9SF1,TP53,SRC,EP300,IKBKG,CSNK2A1,ABL1,AKT1,STAT3,PRKACA,MAPK3,HSPA8,GSK3B,EEF1A1,HIF1A,SIRT1,PRKAB1,CSNK2A2,STUB1,HTATIP,SMURF1,ATM,MAPK8,HGS,HSP90AA1,BCL2,CDC37,NEDD4,SQSTM1,DNCL1,PARK2,TBK1,VCP,MAPT,HDAC6,CLTC,UBQLN4,TSG101,GABARAPL2,HMGB1,MAP3K7,HSPB1,PSEN1,PPARGC1A,CDK5,KDR,PIK3CA,MET,HTT,GABARAP
GO:BP	process utilizing autophagic mechanism	GO:0061919	6.82E-12	11.16630174	504	618	57	17847	TPCN1,RUFY4,ATP6V1B2,RAB8A,SIRT2,BAG3,RAB1B,TM9SF1,TP53,SRC,EP300,IKBKG,CSNK2A1,ABL1,AKT1,STAT3,PRKACA,MAPK3,HSPA8,GSK3B,EEF1A1,HIF1A,SIRT1,PRKAB1,CSNK2A2,STUB1,HTATIP,SMURF1,ATM,MAPK8,HGS,HSP90AA1,BCL2,CDC37,NEDD4,SQSTM1,DNCL1,PARK2,TBK1,VCP,MAPT,HDAC6,CLTC,UBQLN4,TSG101,GABARAPL2,HMGB1,MAP3K7,HSPB1,PSEN1,PPARGC1A,CDK5,KDR,PIK3CA,MET,HTT,GABARAP
GO:BP	antigen receptor-mediated signaling pathway	GO:0050851	7.92E-12	11.10136353	317	618	44	17847	PTPN6,PSMC2,RUNX1,PSMA5,TRAF6,IKBKG,MAPK1,PIK3R1,FYN,ABL1,RELA,NFKB1,PLCG1,LCK,LYN,IKBKB,NCK1,SYK,CHUK,PAK1,PSMC5,BCL2,PRKCB,PSMA1,PAK2,PSMD4,BTRC,PSMD2,BTK,PDPK1,CSK,PSMA3,ZAP70,MAP3K7,PSMC1,HRAS,PSMD13,PSEN1,BCAR1,PTPRC,PSMC6,PSMA6,PIK3CA,PSMC4
GO:BP	regulation of nucleocytoplasmic transport	GO:0046822	9.20E-12	11.03633144	109	618	26	17847	PRKCD,BAG3,TXN,TPR,TP53,SMAD3,MAPK1,PIK3R1,MDM2,PRKACA,PTPN11,HDAC3,YWHAE,GSK3B,MAPK14,FLNA,DHX9,SFN,TRIM28,CDH1,XPO1,NEDD4,KHDRBS1,BARD1,PSEN1,CDK5
GO:BP	establishment of protein localization	GO:0045184	1.04E-11	10.98391564	2199	618	145	17847	TRAM1,CLTA,SAMM50,UBE2D3,ANKRD1,COMP,ATP6V1B2,RAB8A,NIPBL,PRKCD,TSLP,BAG3,TXN,MYOM1,HFE,TGFB3,RAB1B,RPS26,FGG,SYNGR1,PANX3,RAF1,RAE1,TPR,KIF1A,UBA52,UBC,TP53,YWHAZ,SRC,TRAF6,EGFR,SMAD3,SMAD2,YWHAG,MAPK1,PIK3R1,FYN,MDM2,ABL1,AKT1,UBE2D2,PRKCA,STAT3,MCC,PRKACA,UBB,MAPK3,PTPN11,YWHAQ,YWHAB,RPS27A,HDAC3,PML,HSPA8,YWHAE,NPM1,NFKBIA,RUVBL2,GSK3B,PPARG,LYN,MAPK14,JAK2,FLNA,SYK,HSPA4,ERBB2,CDKN1A,HIF1A,P…
GO:BP	nucleocytoplasmic transport	GO:0006913	1.32E-11	10.87840772	349	618	46	17847	SNRPF,PRKCD,BAG3,TXN,RAE1,TPR,TP53,SMAD3,MAPK1,PIK3R1,MDM2,AKT1,STAT3,PRKACA,PTPN11,HDAC3,PML,YWHAE,NPM1,NFKBIA,GSK3B,MAPK14,FLNA,SYK,CDKN1A,DHX9,SFN,SRRM1,RNPS1,SMURF1,TRIM28,ATXN1,CDH1,XPO1,NEDD4,KPNA2,HNRPA1,DDX20,PHB2,KHDRBS1,SNRPB,BARD1,PSEN1,CDK5,LMNA,SNRPD2
GO:BP	cell cycle G1/S phase transition	GO:0044843	1.39E-11	10.85590461	295	618	42	17847	PTPN6,MEN1,CDKN2A,CDK2AP2,CTDSP2,TP53,EP300,MYC,EGFR,MDM2,AKT1,RB1,PCNA,PRKDC,PML,MCM7,CDK1,CDKN1A,MCM3,SFN,ATM,E2F1,CDK4,BCL2,MCM2,CCND1,RBL1,RPS6KB1,MCM5,MCM6,PHB2,KHDRBS1,RPA2,MAX,ITGB1,CUL4A,CARM1,MDM4,TAF1,BRD7,CDK7,CCNB1
GO:BP	positive regulation of intracellular transport	GO:0032388	1.62E-11	10.78974839	208	618	35	17847	UBE2D3,PRKCD,BAG3,ATP2A1,TPR,TP53,SMAD3,MAPK1,PIK3R1,FYN,MDM2,PRKACA,HDAC3,YWHAE,GSK3B,MAPK14,FLNA,SYK,ERBB2,CSNK2A2,DHX9,SFN,TRIM28,CDC42,PAK1,CDH1,NEDD4,PARK2,KHDRBS1,ANXA2,GAB2,HRAS,PSEN1,CDK5,DAB2
GO:BP	protein-DNA complex assembly	GO:0065004	1.80E-11	10.74508133	258	618	39	17847	PSMC2,CENPN,TSPY2,UBA52,UBC,TP53,ESR1,RB1,UBB,RPS27A,PARP1,SMARCA4,H2AFX,NPM1,TBP,MCM7,DAXX,RBBP4,MCM3,TERF1,RBBP7,PSMC5,CREB1,THRA,MCM2,SET,DDB1,MCM5,GTF2B,CHAF1A,MCM6,HMGB1,RPA2,SMARCB1,CUL4A,PSMC6,TAF1,PSMC4,CDK7
GO:BP	positive regulation of leukocyte cell-cell adhesion	GO:1903039	1.88E-11	10.72540057	221	618	36	17847	PTPN6,EFNB1,RUNX1,GRB2,SRC,TRAF6,PIK3R1,FYN,AKT1,RELA,RARA,PTPN11,LCK,LYN,NCK1,SYK,PRKCZ,CDC42,PAK1,ZBTB16,VAV1,CAV1,ETS1,PAK2,MYB,PDPK1,CSK,HMGB1,ZAP70,RHOA,TGFBR2,PTPRC,TNFRSF14,PIK3CA,FADD,JAK3
GO:BP	regulation of leukocyte cell-cell adhesion	GO:1903037	1.90E-11	10.7216503	311	618	43	17847	PTPN6,EFNB1,PLA2G2A,HFE,RUNX1,CDKN2A,GRB2,SRC,TRAF6,PIK3R1,FYN,AKT1,RELA,RARA,PTPN11,LCK,CEBPB,LYN,NCK1,SYK,ERBB2,PRKCZ,CDC42,PAK1,ZBTB16,VAV1,CAV1,ETS1,PAK2,MYB,PDPK1,CSK,HMGB1,ZAP70,ITCH,PPARA,RHOA,TGFBR2,PTPRC,TNFRSF14,PIK3CA,FADD,JAK3
GO:BP	ERBB signaling pathway	GO:0038127	1.91E-11	10.71943382	142	618	29	17847	GRB2,SRC,EGFR,MAPK1,PIK3R1,ABL1,AKT1,PRKCA,PTPN11,PLCG1,CBL,SHC1,ERBB2,APP,STUB1,CDC42,HGS,HSP90AA1,CDC37,PTK2B,TSG101,PDPK1,SOS1,FASLG,PSEN1,BCAR1,IQGAP1,ERBB4,PIK3CA
GO:BP	response to reactive oxygen species	GO:0000302	2.09E-11	10.67918716	234	618	37	17847	PRKCD,TXN,MB,FOS,SRC,EGFR,JUN,MAPK1,FYN,MDM2,ABL1,AKT1,RELA,HDAC2,PCNA,MAPK3,STAT1,CRK,CDK1,SIRT1,CHUK,MAPK8,BCL2,ETS1,PTK2B,PPP2CB,MAPT,HDAC6,MAP3K5,MYB,BTK,PDGFRB,DNM2,STK24,PPARGC1A,MET,CFLAR
GO:BP	hematopoietic progenitor cell differentiation	GO:0002244	2.11E-11	10.67571544	175	618	32	17847	PTPN6,PSMC2,TOP2A,RUNX1,PSMA5,TP53,ABL1,PRKDC,SIN3A,XRCC5,PSMC5,BCL2,PSMA1,PSMD4,SRF,MYB,PSMD2,NOTCH1,PDGFRB,PSMA3,SOS1,TCF3,ITCH,PSMC1,TAL1,KIT,PSMD13,PSEN1,PTPRC,PSMC6,PSMA6,PSMC4
GO:BP	regulation of cell activation	GO:0050865	2.17E-11	10.66437292	630	618	64	17847	PTPN6,EFNB1,PRKCD,TSLP,PLA2G2A,CD320,HFE,FGG,RUNX1,SOX11,CDKN2A,GRB2,SRC,TRAF6,CTNNB1,PIK3R1,FYN,ABL1,AKT1,PRKCA,RARA,PTPN11,LCK,CEBPB,LYN,NCK1,JAK2,SYK,ERBB2,CDKN1A,PRKCZ,RIF1,ATM,CDC42,PAK1,ZBTB16,VAV1,CAV1,BCL2,CEBPA,FANCA,MLH1,TNFRSF1B,BCR,PAK2,MYB,BTK,PDGFRB,PDPK1,CSK,HMGB1,ZAP70,SOS1,GAB2,ITCH,IRS2,RHOA,TGFBR2,PTPRC,TNFRSF14,PIK3CA,FADD,NR1H3,JAK3
GO:BP	morphogenesis of an epithelium	GO:0002009	2.17E-11	10.66387879	549	618	59	17847	TCAP,PSMC2,RXRA,FOLR1,SOX11,MAGED1,WNT7A,PSMA5,VEGFA,ESR1,GRB2,SRC,TRAF6,MYC,AR,EGFR,SMAD3,CTNNB1,ABL1,SMAD4,PRKACA,RARA,PML,STAT1,FLNA,HIF1A,VDR,SMURF1,TRIM28,CDC42,PAK1,SMURF2,PSMC5,BCL2,PPP1CA,ARRB2,AIRE,PSMA1,PSMD4,BTRC,SRF,CLTC,ILK,PSMD2,NOTCH1,PHB2,PSMA3,SOS1,DVL2,PSMC1,PSMD13,PSEN1,RHOA,TGFBR2,PSMC6,PSMA6,DAB2,PSMC4,MET
GO:BP	positive regulation of protein transport	GO:0051222	2.41E-11	10.61787847	427	618	51	17847	UBE2D3,ANKRD1,PRKCD,TSLP,BAG3,MYOM1,TGFB3,FGG,PANX3,TPR,TP53,SRC,EGFR,SMAD3,MAPK1,PIK3R1,FYN,MDM2,ABL1,PRKACA,MAPK3,HDAC3,YWHAE,GSK3B,MAPK14,JAK2,FLNA,SYK,ERBB2,HIF1A,PRKCZ,CSNK2A2,CHUK,DHX9,SFN,TRIM28,CDC42,PAK1,ARF6,CDH1,ARRB1,PRKCB,PRKCE,NR0B2,TSG101,HMGB1,IRS2,HRAS,PSEN1,CDK5,TNFRSF14
GO:BP	regulation of body fluid levels	GO:0050878	2.61E-11	10.58339197	504	618	56	17847	NFE2,PTPN6,COMP,PRKCD,CSN3,APLNR,HBG1,FGG,RAF1,VEGFA,YWHAZ,SRC,HDAC1,MAPK1,PIK3R1,FYN,PRKCA,ACTB,HDAC2,PRKACA,MAPK3,PTPN11,LCK,NCOR2,NCOA1,LYN,JAK2,FLNA,SYK,HIF1A,VDR,SFN,CDC42,ACTG1,VAV1,CREB1,CAV1,ARRB1,ARRB2,CCND1,PRKCB,STAT5A,PRKCE,SRF,ILK,MYH9,PDPK1,ANXA2,CBX5,HSPB1,PRKCG,ERBB4,PIK3CA,ITGB3,MET,NR1H3
GO:BP	response to light stimulus	GO:0009416	2.68E-11	10.57128103	314	618	43	17847	CEP250,NPHP1,MEN1,ASNS,FOS,TP53,EP300,CREBBP,MYC,EGFR,PIK3R1,MDM2,AKT1,RELA,PCNA,PARP1,PML,NPM1,RUVBL2,CDKN1A,HIF1A,SIRT1,APP,MAPK8,CREB1,BCL2,PPP1CA,ARRB1,NEDD4,CCND1,DDB1,ATR,YY1,CHEK1,BCL3,DNM2,ATF4,KIT,ITGB1,UNC119,JUND,CDK5,TAF1
GO:BP	regulation of intracellular steroid hormone receptor signaling pathway	GO:0033143	2.80E-11	10.5534588	78	618	22	17847	RUNX1,ESR1,SRC,EP300,HDAC1,AR,BRCA1,NCOR1,PARP1,SMARCA4,NCOR2,SIRT1,PAK1,ARRB2,HDAC6,PHB2,STRN3,PHB,CARM1,RHOA,AXIN1,DAB2
GO:BP	negative regulation of transforming growth factor beta receptor signaling pathway	GO:0030512	2.80E-11	10.5534588	78	618	22	17847	TGFB3,UBA52,UBC,TP53,SMAD3,SMAD2,UBB,RPS27A,TGFBR1,PIN1,SIRT1,STUB1,SMURF1,SMURF2,CAV1,HSPA5,HSPA1A,SKIL,PDPK1,DNM2,TGFBR2,STRAP
GO:BP	response to metal ion	GO:0010038	3.04E-11	10.51667779	371	618	47	17847	MT1G,RYR1,HFE,MT2A,FGG,FOS,ACTA1,EGFR,JUN,MAPK1,MDM2,AKT1,PCNA,MAPK3,PARP1,PPP2CA,SUMO1,CDK1,DAXX,HIF1A,APP,CHUK,MAPK8,CASP8,CREB1,CAV1,HSPA5,CDK4,CDH1,BCL2,PPP1CA,CEBPA,NEDD4,CCND1,PARK2,PTK2B,PPP2CB,MAPT,NDRG1,DLG4,ATF4,KIT,JUND,PPARGC1A,FUS,IQGAP1,CCNB1
GO:BP	regulation of extrinsic apoptotic signaling pathway	GO:2001236	3.60E-11	10.44412072	156	618	30	17847	COL2A1,PHIP,FGG,RAF1,SRC,AR,BRCA1,FYN,AKT1,RELA,PML,TGFBR1,PPP2R1A,CASP8,CAV1,HSPA1A,BCL2,PPP1CA,PAK2,SKIL,FASLG,ATF3,PPP2R1B,PTPRC,FAS,LMNA,BMPR1B,CFLAR,HTT,FADD
GO:BP	cell cycle arrest	GO:0007050	3.63E-11	10.44001068	238	618	37	17847	CDC123,CDKN2A,TP53,EP300,MYC,SMAD3,BRCA1,MDM2,ABL1,RB1,PRKACA,PCNA,PML,TGFBR1,CDK1,CDKN1A,PRKAB1,SFN,CDK9,ATM,APC,E2F1,CDK4,CCND1,ILK,SKIL,TSG101,NOTCH1,MAP2K1,KAT2B,HRAS,BARD1,CARM1,CDK5,MDM4,CDK7,CCNB1
GO:BP	positive regulation of protein complex assembly	GO:0031334	3.82E-11	10.41797092	251	618	38	17847	PSRC1,PSMC2,VEGFA,TP53,ESR1,GRB2,SRC,PARP1,GSK3B,SUMO1,NCK1,SYK,STUB1,TERF1,ATM,PAK1,ARF6,PSMC5,CREB1,HSP90AA1,HSPA1A,DDB1,ATR,PTK2B,VCP,PRKCE,MAPT,HDAC6,DCTN1,RPA2,AKAP9,TAL1,MAPRE1,CUL4A,RHOA,PSMC6,PSMC4,MET
GO:BP	regulation of mRNA metabolic process	GO:1903311	4.32E-11	10.36426687	332	618	44	17847	CSDA,EXOSC1,PRKCD,PSMC2,PSMA5,UBA52,UBC,YWHAZ,AKT1,PRKCA,UBB,YWHAB,RPS27A,HSPA8,NPM1,VIM,MAPK14,DHX9,RNPS1,CDK9,PSMC5,E2F1,HSPA1A,MYOD1,XPO1,SET,NCL,PSMA1,HNRPA1,PSMD4,PSMD2,KHDRBS1,PSMA3,PABPC1,PSMC1,BARD1,HSPB1,PSMD13,FUS,PSMC6,DDX17,PSMA6,PSMC4,CCNB1
GO:BP	cell aging	GO:0007569	4.57E-11	10.3399583	116	618	26	17847	PRKCD,NEK6,CDKN2A,NSMCE2,TP53,ABL1,PRKDC,PML,H2AFX,NPM1,MAPK14,CDK1,CDKN1A,SIRT1,ATM,TERF2,BCL2,ATR,CHEK1,RBL1,SRF,ILK,MAP2K1,HRAS,LMNA,HMGA1
GO:BP	tumor necrosis factor-mediated signaling pathway	GO:0033209	5.09E-11	10.29344508	169	618	31	17847	PSMC2,PSMA5,IKBKG,RELA,STAT1,NFKBIA,TNFRSF1A,IKBKB,JAK2,SYK,MAP3K14,CHUK,CASP8,PSMC5,HSPA1A,TNFRSF1B,PARK2,PTK2B,PSMA1,PSMD4,KRT18,ILK,PSMD2,PSMA3,FASLG,PSMC1,PSMD13,PSMC6,TNFRSF14,PSMA6,PSMC4
GO:BP	regulation of protein localization to membrane	GO:1905475	5.18E-11	10.28583894	192	618	33	17847	PPFIA1,TP53,YWHAZ,AR,EGFR,YWHAG,PIK3R1,FYN,AKT1,ACTB,YWHAQ,YWHAB,YWHAE,ERBB2,PRKCZ,SFN,MAPK8,CASP8,PAK1,ARF6,E2F1,YWHAH,BCL2,SQSTM1,PARK2,PRKCE,CLTC,PDPK1,CSK,HRAS,ITGB1,CDK5,DAB2
GO:BP	positive regulation of chromatin organization	GO:1905269	5.23E-11	10.28109089	107	618	25	17847	NIPBL,TPR,VEGFA,TP53,BRCA1,CTNNB1,SMAD4,MAPK3,SIN3A,RUVBL2,SIRT1,RIF1,CDK9,ATM,TRIM28,ARRB1,SETDB1,MYB,TAL1,SMARCB1,PPARGC1A,DNMT1,BRD7,LMNA,CCNB1
GO:BP	cell adhesion	GO:0007155	5.47E-11	10.26177708	1421	618	106	17847	PARVG,PTPN6,COMP,NPHP1,EFNB1,SIGLEC10,PPFIA1,PRKCD,BOC,PLA2G2A,PLXNB1,MEN1,HFE,VCAN,CLDN5,MYBPH,FGG,MYBPC2,PIP5K1C,RUNX1,MYBPC1,CDKN2A,VEGFA,GRB2,SRC,TRAF6,EGFR,SMAD3,CTNNB1,PIK3R1,FYN,ABL1,AKT1,PRKCA,ACTB,RELA,RARA,PTPN11,LCK,SHC1,PML,PPP2CA,CRK,PPP2R1A,GSK3B,CEBPB,LYN,NCK1,MAPK14,JAK2,FLNA,SYK,ERBB2,PRKCZ,APP,ATM,CDC42,PAK1,APC,ACTG1,ZBTB16,ARF6,VAV1,CAV1,CDH1,BCL2,PPP1CA,FN1,ETS1,BCR,PTK2B,PAK…
GO:BP	T cell costimulation	GO:0031295	5.99E-11	10.22232947	57	618	19	17847	PTPN6,EFNB1,GRB2,SRC,PIK3R1,FYN,AKT1,PTPN11,LCK,LYN,CDC42,PAK1,VAV1,CAV1,PAK2,PDPK1,CSK,TNFRSF14,PIK3CA
GO:BP	positive regulation of T cell activation	GO:0050870	6.18E-11	10.20915351	205	618	34	17847	PTPN6,EFNB1,RUNX1,GRB2,SRC,TRAF6,PIK3R1,FYN,AKT1,RARA,PTPN11,LCK,LYN,NCK1,SYK,PRKCZ,CDC42,PAK1,ZBTB16,VAV1,CAV1,PAK2,MYB,PDPK1,CSK,HMGB1,ZAP70,RHOA,TGFBR2,PTPRC,TNFRSF14,PIK3CA,FADD,JAK3
GO:BP	regulation of transmembrane receptor protein serine/threonine kinase signaling pathway	GO:0090092	6.22E-11	10.2061899	242	618	37	17847	HFE2,NBL1,MYOCD,MEN1,HFE,TGFB3,FOLR1,SOX11,UBA52,UBC,TP53,EP300,CREBBP,SMAD3,SMAD2,ABL1,SMAD4,UBB,RPS27A,PARP1,TGFBR1,PIN1,SIRT1,STUB1,SMURF1,SMURF2,CAV1,HSPA5,HSPA1A,ILK,SKIL,NOTCH1,PDPK1,DNM2,TGFBR2,STRAP,DAB2
GO:BP	cellular response to interleukin-1	GO:0071347	6.67E-11	10.17570263	182	618	32	17847	ANKRD1,PSMC2,FGG,PSMA5,UBA52,UBC,TRAF6,IKBKG,RELA,NFKB1,UBB,MAPK3,RPS27A,NFKBIA,CEBPB,IKBKB,HIF1A,CHUK,PSMC5,SQSTM1,YY1,PSMA1,PSMD4,BTRC,PSMD2,PSMA3,MAP3K7,PSMC1,PSMD13,PSMC6,PSMA6,PSMC4
GO:BP	anatomical structure homeostasis	GO:0060249	6.71E-11	10.17317787	438	618	51	17847	TMEM119,COL2A1,BAG3,ACACA,RFC4,EPAS1,NSMCE2,VEGFA,SRC,TRAF6,MYC,EGFR,CTNNB1,MAPK1,RB1,PRKCA,ACTB,PCNA,MAPK3,PTPN11,PRKDC,PARP1,PML,SYK,HIF1A,XRCC5,RIF1,TERF1,ATM,ACTG1,TERF2,HSP90AA1,BCL2,ATR,PARK2,PTK2B,HNRPA1,XRCC6,SRF,DCTN1,USP7,NOTCH1,CSK,RPA2,TCP1,BARD1,HSPB1,CDK5,STRAP,CCT5,ITGB3
GO:BP	negative regulation of binding	GO:0051100	7.12E-11	10.14738618	171	618	31	17847	PRKCD,HFE,SOX11,SLN,JUN,AKT1,ACTB,HDAC2,MAPK3,SIN3A,NFKBIA,RUVBL2,GSK3B,SUMO1,JAK2,PIN1,STUB1,MAPK8,CAV1,E2F1,HSPA5,PPP1CA,ARRB2,DISC1,GTF2F1,PPARA,PSEN1,CARM1,TAF1,DAB2,MET
GO:BP	cellular response to drug	GO:0035690	7.35E-11	10.13354854	439	618	51	17847	PRKCD,RYR1,TXN,MT2A,FOLR1,CHRNA4,TP53,SRC,MYC,EGFR,BRCA1,CTNNB1,MAPK1,FYN,MDM2,ABL1,NR3C1,ACTB,RELA,HDAC2,NFKB1,PCNA,MAPK3,SIN3A,CRK,NCOA1,GSK3B,VIM,FLNA,CDK1,DAXX,SIRT1,HSPA5,CDK4,CDH1,ARRB2,ETS1,PARK2,HNRPA1,PRKCE,HDAC6,MAP3K5,MYB,DNM2,ATF4,PPARGC1A,KDR,TAF1,MET,CFLAR,ADRBK1
GO:BP	biological adhesion	GO:0022610	7.56E-11	10.12147033	1428	618	106	17847	PARVG,PTPN6,COMP,NPHP1,EFNB1,SIGLEC10,PPFIA1,PRKCD,BOC,PLA2G2A,PLXNB1,MEN1,HFE,VCAN,CLDN5,MYBPH,FGG,MYBPC2,PIP5K1C,RUNX1,MYBPC1,CDKN2A,VEGFA,GRB2,SRC,TRAF6,EGFR,SMAD3,CTNNB1,PIK3R1,FYN,ABL1,AKT1,PRKCA,ACTB,RELA,RARA,PTPN11,LCK,SHC1,PML,PPP2CA,CRK,PPP2R1A,GSK3B,CEBPB,LYN,NCK1,MAPK14,JAK2,FLNA,SYK,ERBB2,PRKCZ,APP,ATM,CDC42,PAK1,APC,ACTG1,ZBTB16,ARF6,VAV1,CAV1,CDH1,BCL2,PPP1CA,FN1,ETS1,BCR,PTK2B,PAK…
GO:BP	stem cell differentiation	GO:0048863	8.30E-11	10.08112316	257	618	38	17847	EFNB1,PSMC2,MYOCD,FOLR1,RUNX2,RUNX1,SOX11,WNT7A,PSMA5,TP53,ESR1,MAPK1,ABL1,SMAD4,STAT3,MAPK3,HIF1A,XRCC5,PSMC5,FN1,PSMA1,PSMD4,SRF,MYB,PSMD2,NOTCH1,PSMA3,TCF3,ITCH,PSMC1,TAL1,KIT,PSMD13,PTPRC,ERBB4,PSMC6,PSMA6,PSMC4
GO:BP	regulation of neurogenesis	GO:0050767	8.85E-11	10.05287647	840	618	75	17847	ANKRD1,PMP22,NIPBL,NBL1,SIRT2,PLXNB1,TUBB2B,BHLHB3,SOX11,WNT7A,MIR210,VEGFA,TP53,EP300,HDAC1,YWHAG,CTNNB1,FYN,MDM2,ABL1,AKT1,RELA,HDAC2,STAT3,RARA,SIN3A,CRK,NCOA1,GSK3B,PPARG,LYN,VIM,NCK1,FLNA,CDK1,HIF1A,XRCC5,APP,SMURF1,THRB,PAK1,ARF6,CREB1,E2F1,HSPA5,YWHAH,BCL2,FN1,NEDD4,SF3A2,TNFRSF1B,PARK2,PTK2B,DISC1,TNIK,MAPT,SRF,ILK,SKIL,MYB,NOTCH1,MAP2K1,DNM2,DLG4,DVL2,TCF3,STK24,KIT,PSEN1,CARM1,CDK5,RHOA…
GO:BP	neuron projection morphogenesis	GO:0048812	9.48E-11	10.0232058	667	618	65	17847	EFNB1,RAB8A,NBL1,BOC,PLXNB1,TUBB2B,SGK1,WNT7A,VEGFA,GRB2,SRC,EGFR,CTNNB1,MAPK1,PIK3R1,FYN,ABL1,PRKCA,ACTB,SMAD4,UBB,MAPK3,PTPN11,PLCG1,SHC1,SIN3A,GSK3B,ERBB2,PRKCZ,APP,SMURF1,CDC42,PAK1,CREB1,HSP90AA1,YWHAH,BCL2,FN1,NEDD4,PARK2,DISC1,TNIK,MAPT,HDAC6,SRF,SPTAN1,ILK,SKIL,NOTCH1,MAP2K1,SOS1,DNM2,DLG4,GAB2,DVL2,IRS2,SIAH1,ITGB1,PSEN1,CDK5,RHOA,IQGAP1,PIK3CA,BMPR1B,GRB10
GO:BP	myeloid leukocyte differentiation	GO:0002573	9.60E-11	10.01771314	208	618	34	17847	MT1G,TRIB1,FOS,RUNX1,VEGFA,SRC,TRAF6,MYC,JUN,CTNNB1,PIK3R1,RB1,PRKCA,RARA,PARP1,PPARG,CEBPB,LYN,MAPK14,SIRT1,APP,CASP8,CDC42,CREB1,CEBPA,MYH9,ANXA2,GAB2,TAL1,KIT,CUL4A,PSEN1,TGFBR2,FADD
GO:BP	regulation of lipid metabolic process	GO:0019216	9.72E-11	10.01239691	412	618	49	17847	RORC,ANKRD1,NR1H2,FHL2,PRKCD,ADIPOR2,TIAM2,ACACA,RXRA,SCD,TM6SF2,SRC,CREBBP,BRCA1,PIK3R1,AKT1,RB1,SP1,NFKB1,NCOR1,SIN3A,HDAC3,NCOR2,NCOA1,PPARG,TNFRSF1A,LYN,SIRT1,NCOA6,VDR,IRS1,STUB1,CDC42,CREB1,CAV1,THRA,CDK4,NCOA2,PTK2B,RBL1,PRKCE,DDX20,PDGFRB,IRS2,KIT,PPARA,PPARGC1A,CARM1,NR1H3
GO:BP	response to UV	GO:0009411	9.73E-11	10.01176487	140	618	28	17847	MEN1,TP53,EP300,CREBBP,MYC,EGFR,PIK3R1,MDM2,AKT1,RELA,PCNA,PARP1,PML,NPM1,RUVBL2,CDKN1A,SIRT1,MAPK8,BCL2,NEDD4,CCND1,DDB1,ATR,YY1,CHEK1,BCL3,ATF4,TAF1
GO:BP	regulation of developmental growth	GO:0048638	1.00E-10	9.998139391	354	618	45	17847	CSDA,MYH6,NIPBL,MYOZ1,VEGFA,AR,MAPK1,ABL1,AKT1,STAT3,PRKDC,SIN3A,TGFBR1,GSK3B,MAPK14,CDK1,PIN1,CDKN1A,APP,SMURF1,PAK1,CREB1,MYOD1,CDK4,BCL2,FN1,STAT5A,INSR,PARK2,YY1,DISC1,MAPT,GH1,SRF,ILK,STAT5B,NOTCH1,DNM2,PPARA,CARM1,CDK5,TGFBR2,ERBB4,PIK3CA,CCNB1
GO:BP	negative regulation of apoptotic signaling pathway	GO:2001234	1.01E-10	9.99662946	233	618	36	17847	COL2A1,CSDA,PHIP,AATF,FGG,RAF1,MIR210,SRC,HDAC1,AR,BRCA1,CSNK2A1,CTNNB1,FYN,MDM2,AKT1,RB1,RELA,TGFBR1,HIF1A,SIRT1,CSNK2A2,CASP8,HSPA1A,BCL2,ARRB2,PARK2,TAF9,FASLG,HSPB1,PSEN1,FAS,LMNA,CFLAR,HTT,FADD
GO:BP	positive regulation of cell cycle	GO:0045787	1.12E-10	9.949393848	384	618	47	17847	PSRC1,PHIP,NIPBL,SIRT2,ASNS,TPR,NSMCE2,TP53,SRC,EP300,EGFR,BRCA1,MDM2,ABL1,AKT1,RB1,PRKCA,PRKACA,RARA,PCNA,PTPN11,SIN3A,PML,NPM1,CDK1,CDKN1A,APP,SFN,CDK9,ATM,CDC42,E2F1,CDK4,CCND1,INSR,CHEK1,PRKCE,RPS6KB1,PDGFRB,PHB2,SFPQ,TAL1,CUL4A,CARM1,RHOA,MDM4,CCNB1
GO:BP	actin cytoskeleton organization	GO:0030036	1.17E-10	9.931711276	670	618	65	17847	PARVG,ANKRD1,NPHP1,MYH6,FMNL3,PPFIA1,PRKCD,TCAP,ESPN,MYL2,MYOM1,TNNT3,TGFB3,INF2,MYH11,FLNB,CAP1,XIRP2,PIP5K1C,CYTH2,ACTA1,SYNPO2L,MYOZ1,FGD5,GRB2,SRC,SMAD3,PIK3R1,ABL1,ACTB,SMAD4,SHC1,TGFBR1,CRK,IKBKB,NCK1,JAK2,FLNA,EPB41,CDC42,PAK1,ACTG1,ARF6,BCL2,ARRB1,BCR,PARK2,PTK2B,PRKCE,TNIK,SRF,SPTAN1,ILK,MYH9,ACTN1,PDGFRB,PDPK1,HRAS,KIT,ITGB1,CDK5,BCAR1,RHOA,MET,CFLAR
GO:BP	cell morphogenesis involved in differentiation	GO:0000904	1.33E-10	9.876690367	758	618	70	17847	PARVG,PTPN6,EFNB1,RAB8A,BOC,PLXNB1,TUBB2B,FLNB,FGG,WNT7A,VEGFA,GRB2,SRC,EP300,AR,CTNNB1,MAPK1,PIK3R1,FYN,ABL1,RB1,PRKCA,ACTB,SMAD4,MAPK3,PTPN11,PLCG1,SHC1,SIN3A,CRK,GSK3B,FLNA,ERBB2,APP,CDC42,PAK1,CREB1,HSP90AA1,YWHAH,BCL2,FN1,NEDD4,DISC1,TNIK,MAPT,HDAC6,SRF,SPTAN1,ILK,MYH9,SKIL,ACTN1,NOTCH1,MAP2K1,SOS1,DNM2,DLG4,GAB2,IRS2,TAL1,SIAH1,ITGB1,PSEN1,CDK5,RHOA,PIK3CA,ITGB3,BMPR1B,MET,GRB10
GO:BP	G1/S transition of mitotic cell cycle	GO:0000082	1.52E-10	9.818290387	275	618	39	17847	PTPN6,CDKN2A,CDK2AP2,CTDSP2,TP53,EP300,MYC,EGFR,MDM2,AKT1,RB1,PCNA,PRKDC,PML,MCM7,CDK1,CDKN1A,MCM3,SFN,ATM,E2F1,CDK4,BCL2,MCM2,CCND1,RBL1,RPS6KB1,MCM5,MCM6,KHDRBS1,RPA2,MAX,ITGB1,CUL4A,CARM1,MDM4,BRD7,CDK7,CCNB1
GO:BP	cellular response to biotic stimulus	GO:0071216	1.76E-10	9.753862297	250	618	37	17847	ANKRD1,NR1H2,SIRT2,TRIB1,TP53,SRC,TRAF6,MAPK1,ABL1,AKT1,PRKCA,RELA,NFKB1,RARA,MAPK3,NFKBIA,GSK3B,CEBPB,LYN,VIM,MAPK14,SYK,VDR,MAPK8,HSPA5,HDAC5,CDK4,TNFRSF1B,BCR,PRKCE,NFKBIB,SMC1L1,BTK,HMGB1,PPARGC1A,RHOA,NR1H3
GO:BP	regulation of protein complex assembly	GO:0043254	1.80E-10	9.744314826	449	618	51	17847	PSRC1,SIRT2,PRKCD,PSMC2,RAF1,VEGFA,TP53,ESR1,GRB2,SRC,EP300,ABL1,RB1,PTPN11,PARP1,HSPA8,GSK3B,SUMO1,NCK1,SYK,PRKCZ,STUB1,TERF1,ATM,CDC42,PAK1,ARF6,PSMC5,CREB1,HSP90AA1,THRA,HSPA1A,DDB1,ATR,PTK2B,VCP,PRKCE,MAPT,HDAC6,DCTN1,SPTAN1,HMGB1,RPA2,AKAP9,TAL1,MAPRE1,CUL4A,RHOA,PSMC6,PSMC4,MET
GO:BP	regulation of protein transport	GO:0051223	1.82E-10	9.738909484	728	618	68	17847	UBE2D3,ANKRD1,RAB8A,PRKCD,TSLP,BAG3,TXN,MYOM1,TGFB3,FGG,PANX3,TPR,TP53,SRC,TRAF6,EGFR,SMAD3,MAPK1,PIK3R1,FYN,MDM2,ABL1,PRKCA,PRKACA,MAPK3,PTPN11,HDAC3,PML,HSPA8,YWHAE,GSK3B,LYN,MAPK14,JAK2,FLNA,SYK,ERBB2,HIF1A,PRKCZ,CSNK2A2,IRS1,CHUK,DHX9,SFN,TRIM28,CDC42,PAK1,ARF6,CDH1,XPO1,ARRB1,FN1,PRKCB,TNFRSF1B,PARK2,PRKCE,NR0B2,TSG101,CSK,HMGB1,IRS2,HRAS,BARD1,PSEN1,CDK5,TNFRSF14,ITGB3,NR1H3
GO:BP	signal transduction in response to DNA damage	GO:0042770	1.90E-10	9.721369588	133	618	27	17847	ANKRD1,TP53,GRB2,EP300,BRCA1,MDM2,ABL1,PCNA,PRKDC,PML,MAPK14,CDK1,CDKN1A,PLK1,SIRT1,HTATIP,SFN,ATM,E2F1,ATR,CHEK1,CDC5L,NDRG1,BCL3,CARM1,MDM4,CCNB1
GO:BP	insulin receptor signaling pathway	GO:0008286	2.05E-10	9.688201407	144	618	28	17847	ATP6V1B2,PHIP,PRKCD,GRB2,SRC,PIK3R1,AKT1,RELA,PTPN11,SHC1,GSK3B,NCK1,PRKCZ,SIRT1,IRS1,PAK1,APC,CDK4,PRKCB,INSR,SMARCC1,RPS6KB1,IGF1R,SOS1,IRS2,BCAR1,PIK3CA,GRB10
GO:BP	leukocyte cell-cell adhesion	GO:0007159	2.13E-10	9.672138564	347	618	44	17847	PTPN6,EFNB1,PLA2G2A,HFE,RUNX1,CDKN2A,GRB2,SRC,TRAF6,PIK3R1,FYN,AKT1,RELA,RARA,PTPN11,LCK,CEBPB,LYN,NCK1,SYK,ERBB2,PRKCZ,CDC42,PAK1,ZBTB16,VAV1,CAV1,ETS1,PAK2,MYB,PDPK1,CSK,HMGB1,ZAP70,ITCH,ITGB1,PPARA,RHOA,TGFBR2,PTPRC,TNFRSF14,PIK3CA,FADD,JAK3
GO:BP	posttranscriptional regulation of gene expression	GO:0010608	2.21E-10	9.656448094	837	618	74	17847	CDC123,CSDA,EXOSC1,PRKCD,PSMC2,MIR99A,RXRA,MIR210,RAE1,TPR,PSMA5,UBA52,UBC,TP53,YWHAZ,ESR1,MYC,EGFR,SMAD3,SMAD2,MAPK1,AKT1,PRKCA,STAT3,UBB,RARA,MAPK3,NCOR1,YWHAB,RPS27A,HSPA8,NCOR2,NPM1,PPARG,SMAD1,VIM,NCK1,POLR2A,MAPK14,GC20,ERBB2,APP,DHX9,PSMC5,CAV1,E2F1,HSPA1A,CDK4,PPP1CA,XPO1,CDC37,SET,TNFRSF1B,NCL,AIRE,PTK2B,PSMA1,PSMD4,RPS6KB1,PSMD2,KHDRBS1,MAP2K1,BCL3,PSMA3,PABPC1,PSMC1,ATF4,HSPB1,PSMD13,F…
GO:BP	reproductive structure development	GO:0048608	2.21E-10	9.656344954	436	618	50	17847	CSDA,NIPBL,MYOCD,MEN1,RXRA,EPAS1,WNT7A,TSPY2,VEGFA,ESR1,GRB2,SRC,AR,EGFR,CTNNB1,MAPK1,AKT1,SMAD4,UBB,RARA,MAPK3,PTPN11,CBL,TGFBR1,NCOA1,PPARG,CEBPB,MAPK14,FLNA,HIF1A,SIRT1,VDR,ATM,CASP8,TRIM28,HSPA5,BCL2,ARRB1,CEBPA,FANCA,ARRB2,CCND1,INSR,SMARCC1,NRIP1,NOTCH1,PDGFRB,MAP2K1,KIT,BMPR1B
GO:BP	response to temperature stimulus	GO:0009266	2.23E-10	9.650931216	239	618	36	17847	CSDA,BAG3,FOS,RAE1,TPR,EP300,CREBBP,MAPK1,AKT1,HDAC2,PRKACA,MAPK3,HSPA8,YWHAE,NFKBIA,GSK3B,PPARG,SUMO1,LYN,DAXX,CDKN1A,SIRT1,STUB1,ATM,CASP8,RBBP7,HSP90AA1,THRA,HSPA5,HSPA1A,ARRB2,ATR,VCP,MAPT,RPA2,PPARGC1A
GO:BP	regulation of lymphocyte activation	GO:0051249	2.38E-10	9.622833832	499	618	54	17847	PTPN6,EFNB1,PLA2G2A,CD320,HFE,RUNX1,SOX11,CDKN2A,GRB2,SRC,TRAF6,CTNNB1,PIK3R1,FYN,ABL1,AKT1,RARA,PTPN11,LCK,CEBPB,LYN,NCK1,SYK,ERBB2,CDKN1A,PRKCZ,RIF1,ATM,CDC42,PAK1,ZBTB16,VAV1,CAV1,BCL2,FANCA,MLH1,TNFRSF1B,PAK2,MYB,BTK,PDPK1,CSK,HMGB1,ZAP70,SOS1,ITCH,IRS2,RHOA,TGFBR2,PTPRC,TNFRSF14,PIK3CA,FADD,JAK3
GO:BP	response to extracellular stimulus	GO:0009991	2.41E-10	9.618517062	531	618	56	17847	SIRT2,MYOCD,ADIPOR2,HFE,FOLR1,ASNS,FOS,ACTA1,DAD1,TP53,SRC,EGFR,JUN,MAPK1,FYN,MDM2,AKT1,RELA,RARA,PCNA,MAPK3,CBL,HSPA8,STAT1,NCOA1,PPARG,LYN,CDKN1A,SIRT1,VDR,MAPK8,CREB1,HSPA5,MYOD1,BCL2,CCND1,MGMT,HNRPA1,GH1,RPS6KB1,SRF,SETDB1,MAP3K5,GABARAPL2,MAX,ATF4,STK24,PPARA,PPARGC1A,ATF3,TGFBR2,PRKCG,PTPRC,TAF1,FAS,GABARAP
GO:BP	negative regulation of transmembrane receptor protein serine/threonine kinase signaling pathway	GO:0090101	2.47E-10	9.608113275	124	618	26	17847	HFE2,NBL1,TGFB3,UBA52,UBC,TP53,SMAD3,SMAD2,ABL1,UBB,RPS27A,TGFBR1,PIN1,SIRT1,STUB1,SMURF1,SMURF2,CAV1,HSPA5,HSPA1A,SKIL,NOTCH1,PDPK1,DNM2,TGFBR2,STRAP
GO:BP	plasma membrane bounded cell projection morphogenesis	GO:0120039	2.50E-10	9.601585924	681	618	65	17847	EFNB1,RAB8A,NBL1,BOC,PLXNB1,TUBB2B,SGK1,WNT7A,VEGFA,GRB2,SRC,EGFR,CTNNB1,MAPK1,PIK3R1,FYN,ABL1,PRKCA,ACTB,SMAD4,UBB,MAPK3,PTPN11,PLCG1,SHC1,SIN3A,GSK3B,ERBB2,PRKCZ,APP,SMURF1,CDC42,PAK1,CREB1,HSP90AA1,YWHAH,BCL2,FN1,NEDD4,PARK2,DISC1,TNIK,MAPT,HDAC6,SRF,SPTAN1,ILK,SKIL,NOTCH1,MAP2K1,SOS1,DNM2,DLG4,GAB2,DVL2,IRS2,SIAH1,ITGB1,PSEN1,CDK5,RHOA,IQGAP1,PIK3CA,BMPR1B,GRB10
GO:BP	regulation of I-kappaB kinase/NF-kappaB signaling	GO:0043122	2.54E-10	9.594455938	240	618	36	17847	S100A4,NEK6,ESR1,TRAF6,HDAC1,IKBKG,CTNNB1,IKBKE,FYN,ABL1,AKT1,RELA,UBE2I,STAT1,TNFRSF1A,IKBKB,FLNA,SIRT1,MAP3K14,CHUK,CASP8,SQSTM1,PRKCB,TLE1,PARK2,BTRC,TBK1,PRKCE,EEF1D,PDPK1,FASLG,MAP3K7,HSPB1,RHOA,CFLAR,FADD
GO:BP	negative regulation of neuron death	GO:1901215	2.60E-10	9.585039423	215	618	34	17847	TGFB3,JUN,IKBKG,CTNNB1,FYN,AKT1,STAT3,CBL,GSK3B,CEBPB,JAK2,PIN1,HIF1A,SIRT1,CREB1,BCL2,ARRB1,ARRB2,SET,TNFRSF1B,PARK2,PTK2B,ILK,PDPK1,PSMC1,ATF4,HRAS,PPARA,PSEN1,PPARGC1A,CDK5,RHOA,PRKCG,PIK3CA
GO:BP	cellular response to heat	GO:0034605	2.79E-10	9.554989153	135	618	27	17847	BAG3,RAE1,TPR,EP300,CREBBP,MAPK1,HDAC2,PRKACA,MAPK3,HSPA8,YWHAE,GSK3B,SUMO1,LYN,DAXX,CDKN1A,SIRT1,STUB1,ATM,RBBP7,HSP90AA1,HSPA5,HSPA1A,ATR,VCP,MAPT,RPA2
GO:BP	reproductive system development	GO:0061458	2.88E-10	9.540471018	439	618	50	17847	CSDA,NIPBL,MYOCD,MEN1,RXRA,EPAS1,WNT7A,TSPY2,VEGFA,ESR1,GRB2,SRC,AR,EGFR,CTNNB1,MAPK1,AKT1,SMAD4,UBB,RARA,MAPK3,PTPN11,CBL,TGFBR1,NCOA1,PPARG,CEBPB,MAPK14,FLNA,HIF1A,SIRT1,VDR,ATM,CASP8,TRIM28,HSPA5,BCL2,ARRB1,CEBPA,FANCA,ARRB2,CCND1,INSR,SMARCC1,NRIP1,NOTCH1,PDGFRB,MAP2K1,KIT,BMPR1B
GO:BP	response to ionizing radiation	GO:0010212	2.95E-10	9.530800351	146	618	28	17847	NIPBL,MEN1,TP53,GRB2,MYC,BRCA1,MDM2,PRKDC,CBL,PARP1,PML,H2AFX,MAPK14,CDKN1A,SIRT1,XRCC5,HTATIP,ATM,HSPA5,BCL2,CCND1,ATR,MGMT,XRCC6,EEF1D,DNM2,HRAS,PTPRC
GO:BP	response to epidermal growth factor	GO:0070849	2.96E-10	9.529429725	47	618	17	17847	TPR,EGFR,MAPK1,AKT1,MAPK3,PTPN11,PLCG1,CBL,MCM7,EEF1A1,ERBB2,NCL,STAT5B,PDPK1,IQGAP1,ERBB4,CFLAR
GO:BP	muscle organ development	GO:0007517	2.96E-10	9.528410418	409	618	48	17847	ANKRD1,CSDA,MYH6,SIRT2,NR4A1,RYR1,TCAP,MYL2,MYOCD,MYOM1,UNC45A,RXRA,FLNB,XIRP2,MYH7,FOS,SOX11,ACTA1,MYOZ1,EP300,SMAD3,CTNNB1,MAPK1,RB1,SMAD4,TGFBR1,HDAC4,MAPK14,CDK1,PIN1,SIRT1,PAK1,CREB1,CAV1,MYOD1,BCL2,ARRB2,YY1,NOTCH1,PPARA,ATF3,CDK5,RHOA,TGFBR2,ERBB4,DDX17,CCNB1,CFLAR
GO:BP	regulation of DNA binding	GO:0051101	3.01E-10	9.520962033	125	618	26	17847	NIPBL,SIRT2,MYOCD,TXN,SOX11,EP300,TRAF6,JUN,CTNNB1,RB1,HDAC2,SIN3A,PARP1,NFKBIA,PPARG,SUMO1,JAK2,MAPK8,TRIM28,E2F1,PARK2,GTF2B,BCL3,HMGB1,PSEN1,TAF1
GO:BP	positive regulation of protein localization to membrane	GO:1905477	3.01E-10	9.520962033	125	618	26	17847	TP53,YWHAZ,EGFR,YWHAG,PIK3R1,FYN,AKT1,YWHAQ,YWHAB,YWHAE,ERBB2,SFN,MAPK8,CASP8,PAK1,ARF6,E2F1,YWHAH,BCL2,SQSTM1,PARK2,PRKCE,PDPK1,HRAS,ITGB1,CDK5
GO:BP	positive regulation of cytokine production	GO:0001819	3.17E-10	9.499276388	471	618	52	17847	ATP6AP2,TSLP,IL17B,IRF5,PANX3,RUNX1,SRC,EP300,CREBBP,TRAF6,SMAD3,BRCA1,CTNNB1,PIK3R1,ABL1,RELA,HDAC2,NFKB1,STAT3,RARA,MAPK3,PTPN11,PRKDC,STAT1,CEBPB,MAPK14,JAK2,SYK,HIF1A,PRKCZ,XRCC5,APP,CHUK,DHX9,CASP8,NFKB2,CREB1,HSPA1A,TBK1,XRCC6,ATF2,MYB,BCL3,HMGB1,MAP3K7,ATF4,HRAS,HSPB1,PSEN1,PTPRC,TNFRSF14,FADD
GO:BP	vascular endothelial growth factor receptor signaling pathway	GO:0048010	3.26E-10	9.487310858	96	618	23	17847	VEGFA,SRC,PIK3R1,FYN,CRK,NCK1,MAPK14,HIF1A,CDC42,HGS,VAV1,HSP90AA1,NEDD4,PRKCB,PTK2B,PAK2,HSPB1,BCAR1,RHOA,KDR,PIK3CA,ITGB3,GRB10
GO:BP	cell projection morphogenesis	GO:0048858	3.28E-10	9.483588195	685	618	65	17847	EFNB1,RAB8A,NBL1,BOC,PLXNB1,TUBB2B,SGK1,WNT7A,VEGFA,GRB2,SRC,EGFR,CTNNB1,MAPK1,PIK3R1,FYN,ABL1,PRKCA,ACTB,SMAD4,UBB,MAPK3,PTPN11,PLCG1,SHC1,SIN3A,GSK3B,ERBB2,PRKCZ,APP,SMURF1,CDC42,PAK1,CREB1,HSP90AA1,YWHAH,BCL2,FN1,NEDD4,PARK2,DISC1,TNIK,MAPT,HDAC6,SRF,SPTAN1,ILK,SKIL,NOTCH1,MAP2K1,SOS1,DNM2,DLG4,GAB2,DVL2,IRS2,SIAH1,ITGB1,PSEN1,CDK5,RHOA,IQGAP1,PIK3CA,BMPR1B,GRB10
GO:BP	response to antibiotic	GO:0046677	3.30E-10	9.48114236	337	618	43	17847	PRKCD,TXN,CLDN5,MB,TP53,SRC,JUN,FYN,MDM2,ABL1,RELA,HDAC2,STAT3,RARA,PCNA,CBL,STAT1,CRK,JAK2,CDK1,DAXX,SIRT1,CHUK,CASP8,HSP90AA1,HSPA5,BCL2,JAK1,CCND1,ETS1,MGMT,PTK2B,HNRPA1,PRKCE,PPP2CB,HDAC6,SETDB1,MAP3K5,MYB,PDGFRB,STK24,RHOA,MET
GO:BP	positive regulation of cell development	GO:0010720	3.42E-10	9.466332188	568	618	58	17847	ANKRD1,NIPBL,NBL1,SIRT2,TRIB1,PLXNB1,TUBB2B,CLDN5,FGG,SOX11,VEGFA,EP300,HDAC1,CTNNB1,FYN,ABL1,RELA,HDAC2,RARA,SIN3A,CRK,NCOA1,PPARG,LYN,NCK1,FLNA,PIN1,HIF1A,XRCC5,SMURF1,CDC42,PAK1,E2F1,HSPA5,MYOD1,BCL2,FN1,SF3A2,TNFRSF1B,PARK2,PTK2B,DISC1,MAPT,SRF,ILK,SKIL,MYB,NOTCH1,MAP2K1,DNM2,DLG4,DVL2,TCF3,KIT,PSEN1,RHOA,IQGAP1,CFLAR
GO:BP	regulation of intracellular transport	GO:0032386	3.54E-10	9.450703212	352	618	44	17847	UBE2D3,PRKCD,BAG3,TXN,ATP2A1,TPR,TP53,SRC,SMAD3,MAPK1,PIK3R1,FYN,MDM2,PRKACA,MAPK3,PTPN11,HDAC3,YWHAE,GSK3B,LYN,MAPK14,FLNA,SYK,ERBB2,CSNK2A2,DHX9,SFN,TRIM28,CDC42,PAK1,CDH1,XPO1,NEDD4,PARK2,PDPK1,KHDRBS1,MAP2K1,ANXA2,GAB2,HRAS,BARD1,PSEN1,CDK5,DAB2
GO:BP	DNA biosynthetic process	GO:0071897	3.64E-10	9.439351451	193	618	32	17847	ANKRD1,MEN1,RFC4,UBA52,UBC,TP53,SRC,MYC,CTNNB1,MAPK1,UBB,PCNA,MAPK3,RPS27A,PPARG,CDKN1A,SIRT1,XRCC5,TERF1,ATM,TERF2,HSP90AA1,ARRB2,ATR,PTK2B,HNRPA1,VCP,PDGFRB,RPA2,TCP1,PHB,CCT5
GO:BP	regulation of leukocyte activation	GO:0002694	3.83E-10	9.416655364	586	618	59	17847	PTPN6,EFNB1,TSLP,PLA2G2A,CD320,HFE,RUNX1,SOX11,CDKN2A,GRB2,SRC,TRAF6,CTNNB1,PIK3R1,FYN,ABL1,AKT1,RARA,PTPN11,LCK,CEBPB,LYN,NCK1,SYK,ERBB2,CDKN1A,PRKCZ,RIF1,ATM,CDC42,PAK1,ZBTB16,VAV1,CAV1,BCL2,CEBPA,FANCA,MLH1,TNFRSF1B,BCR,PAK2,MYB,BTK,PDPK1,CSK,HMGB1,ZAP70,SOS1,GAB2,ITCH,IRS2,RHOA,TGFBR2,PTPRC,TNFRSF14,PIK3CA,FADD,NR1H3,JAK3
GO:BP	response to gamma radiation	GO:0010332	4.17E-10	9.380104276	55	618	18	17847	MEN1,TP53,MYC,MDM2,PRKDC,CBL,PARP1,PML,H2AFX,CDKN1A,XRCC5,ATM,HSPA5,BCL2,ATR,XRCC6,HRAS,PTPRC
GO:BP	negative regulation of kinase activity	GO:0033673	4.23E-10	9.373919319	257	618	37	17847	PTPN6,STK38,PRKCD,TRIB1,MYOCD,MEN1,CDKN2A,YWHAG,ABL1,AKT1,RB1,CBL,PPP2CA,NPM1,PPP2R1A,LYN,NCK1,CDKN1A,PLK1,SIRT1,SFN,APC,CAV1,CEBPA,PARK2,PAK2,MAPT,ILK,TSG101,IGF1R,PDPK1,CSK,KAT2B,IRS2,HSPB1,PSEN1,PTPRC
GO:BP	supramolecular fiber organization	GO:0097435	4.35E-10	9.361337641	672	618	64	17847	PSRC1,COL2A1,ANKRD1,COMP,MYH6,PPFIA1,PRKCD,TCAP,ESPN,MYL2,MYOM1,CKAP5,TNNT3,TGFB3,MYH11,CAP1,ACTA1,CDKN2A,SYNPO2L,MYOZ1,GRB2,SRC,SMAD3,PIK3R1,MDM2,ABL1,RB1,SMAD4,TGFBR1,HSPA8,VIM,NCK1,JAK2,FLNA,APP,TERF1,CDC42,PAK1,APC,ACTG1,ARF6,HSPA1A,BCL2,ARRB1,PARK2,PTK2B,PRKCE,MAPT,HDAC6,SRF,DCTN1,SPTAN1,ILK,ACTN1,PDGFRB,ANXA2,AKAP9,MAPRE1,ITGB1,PSEN1,BCAR1,RHOA,MET,CFLAR
GO:BP	regulation of peptide transport	GO:0090087	4.37E-10	9.359756248	759	618	69	17847	UBE2D3,ANKRD1,RAB8A,PRKCD,TSLP,BAG3,TXN,MYOM1,HFE,TGFB3,FGG,PANX3,TPR,TP53,SRC,TRAF6,EGFR,SMAD3,MAPK1,PIK3R1,FYN,MDM2,ABL1,PRKCA,PRKACA,MAPK3,PTPN11,HDAC3,PML,HSPA8,YWHAE,GSK3B,LYN,MAPK14,JAK2,FLNA,SYK,ERBB2,HIF1A,PRKCZ,CSNK2A2,IRS1,CHUK,DHX9,SFN,TRIM28,CDC42,PAK1,ARF6,CDH1,XPO1,ARRB1,FN1,PRKCB,TNFRSF1B,PARK2,PRKCE,NR0B2,TSG101,CSK,HMGB1,IRS2,HRAS,BARD1,PSEN1,CDK5,TNFRSF14,ITGB3,NR1H3
GO:BP	peptidyl-threonine phosphorylation	GO:0018107	4.68E-10	9.329929806	117	618	25	17847	SIRT2,PRKCD,CSNK2A1,MAPK1,AKT1,PRKCA,PRKACA,TGFBR1,GSK3B,CDK1,PLK1,CSNK2A2,APP,MAPK8,BCL2,PRKCB,CHEK1,TBK1,PDPK1,MAP2K1,CDK5,TGFBR2,AXIN1,TAF1,ADRBK1
GO:BP	regulation of mitochondrion organization	GO:0010821	4.83E-10	9.316068133	183	618	31	17847	UBE2D3,BAG3,INF2,TP53,YWHAZ,YWHAG,AKT1,YWHAQ,YWHAB,YWHAE,GSK3B,HIF1A,CSNK2A2,SFN,SMURF1,MAPK8,CASP8,E2F1,HSPA1A,YWHAH,BCL2,CDC37,ARRB2,SQSTM1,PARK2,MAPT,HDAC6,PPARGC1A,KDR,LMNA,HTT
GO:BP	cell-cell adhesion	GO:0098609	5.10E-10	9.292413235	851	618	74	17847	PTPN6,COMP,NPHP1,EFNB1,PRKCD,PLA2G2A,HFE,CLDN5,FGG,PIP5K1C,RUNX1,CDKN2A,VEGFA,GRB2,SRC,TRAF6,EGFR,CTNNB1,PIK3R1,FYN,ABL1,AKT1,PRKCA,ACTB,RELA,RARA,PTPN11,LCK,SHC1,CEBPB,LYN,NCK1,MAPK14,JAK2,FLNA,SYK,ERBB2,PRKCZ,CDC42,PAK1,ACTG1,ZBTB16,VAV1,CAV1,CDH1,BCL2,PPP1CA,ETS1,PAK2,KRT18,SRF,ILK,MYH9,MYB,PDPK1,CSK,ANXA2,HMGB1,ZAP70,DLG4,ITCH,KIT,ITGB1,PPARA,HSPB1,PSEN1,RHOA,TGFBR2,PTPRC,TNFRSF14,PIK3CA,ITGB…
GO:BP	positive regulation of neuron death	GO:1901216	5.23E-10	9.281826777	98	618	23	17847	AIMP2,FOS,TP53,JUN,CTNNB1,FYN,ABL1,PARP1,GSK3B,HDAC4,DAXX,PIN1,ATM,CASP8,CDC42,MAPT,ATF2,MAP3K5,MYB,FASLG,ATF4,CDK5,RHOA
GO:BP	epithelial cell proliferation	GO:0050673	5.31E-10	9.274526613	446	618	50	17847	NR4A1,MEN1,APLNR,SOX11,MAGED1,WNT7A,VEGFA,ESR1,MYC,AR,EGFR,SMAD3,JUN,CTNNB1,MAPK1,AKT1,RB1,PRKCA,SP1,STAT3,MCC,PRKDC,PLCG1,TGFBR1,STAT1,PPARG,CEBPB,ERBB2,HIF1A,SIRT1,VDR,SFN,CDC42,CAV1,CCND1,STAT5A,BTRC,ATF2,NOTCH1,PDPK1,PHB2,MAP2K1,HMGB1,HRAS,KIT,PSEN1,STRAP,KDR,ITGB3,CFLAR
GO:BP	positive regulation of cell-cell adhesion	GO:0022409	6.09E-10	9.215385189	260	618	37	17847	PTPN6,EFNB1,FGG,RUNX1,GRB2,SRC,TRAF6,PIK3R1,FYN,AKT1,RELA,RARA,PTPN11,LCK,LYN,NCK1,SYK,PRKCZ,CDC42,PAK1,ZBTB16,VAV1,CAV1,ETS1,PAK2,MYB,PDPK1,CSK,HMGB1,ZAP70,RHOA,TGFBR2,PTPRC,TNFRSF14,PIK3CA,FADD,JAK3
GO:BP	striated muscle cell development	GO:0055002	6.29E-10	9.201071914	173	618	30	17847	ANKRD1,COMP,MYH6,FHL2,RYR1,TCAP,MYL2,MYOM1,TNNT3,MYH11,ACTA1,SYNPO2L,MYOZ1,VEGFA,SMAD4,HDAC4,CDK1,PIN1,PAK1,ACTG1,MYOD1,BCL2,YY1,SRF,PDGFRB,ITGB1,PPARA,LMNA,CCNB1,CFLAR
GO:BP	negative regulation of multicellular organismal process	GO:0051241	6.38E-10	9.195348493	1334	618	99	17847	TMEM119,PTPN6,NR1H2,CSDA,PMP22,SIRT2,PRKCD,TRIB1,MYOCD,MEN1,HFE,TGFB3,CLDN5,FGG,RUNX1,SOX11,WNT7A,MIR210,CDKN2A,TP53,MYC,EGFR,SMAD3,CTNNB1,IKBKE,PIK3R1,MDM2,RB1,HDAC2,SMAD4,NFKB1,STAT3,MCC,PRKACA,RARA,PTPN11,PML,TGFBR1,PPP2CA,STAT1,NFKBIA,GSK3B,PPARG,TNFRSF1A,LYN,VIM,HDAC4,JAK2,ERBB2,PIN1,HIF1A,APP,HTATIP,SMURF1,THRB,PAK1,HGS,ZBTB16,ARF6,HDAC5,YWHAH,BCL2,ARRB1,FN1,ARRB2,TNFRSF1B,BCR,YY1,PTK2B,TBK…
GO:BP	NIK/NF-kappaB signaling	GO:0038061	6.54E-10	9.184538125	185	618	31	17847	PSMC2,PSMA5,EP300,TRAF6,EGFR,IKBKE,AKT1,RELA,NFKB1,NFKBIA,MAP3K14,APP,CHUK,NFKB2,PSMC5,PSMA1,PSMD4,BTRC,ILK,PSMD2,PTP4A3,BCL3,HMGB1,PSMA3,MAP3K7,PSMC1,PSMD13,RHOA,PSMC6,PSMA6,PSMC4
GO:BP	regulation of proteasomal protein catabolic process	GO:0061136	6.54E-10	9.184538125	185	618	31	17847	SIRT2,TRIB1,PSMC2,HFE,MDM2,AKT1,PRKACA,UBB,GSK3B,SUMO1,SUMO2,PLK1,STUB1,CAV1,HSPA1A,CEBPA,PARK2,BTRC,VCP,SMARCC1,USP7,UBQLN4,GABARAPL2,TAF9,PSMC1,PSEN1,PRKCG,UCHL5,TAF1,DAB2,PSMC4
GO:BP	ameboidal-type cell migration	GO:0001667	7.13E-10	9.147131509	465	618	51	17847	EFNB1,S100P,NR4A1,FOLR1,CAP1,WNT7A,MIR210,VEGFA,SRC,JUN,ABL1,AKT1,PRKCA,SP1,MCC,PTPN11,PLCG1,PML,TGFBR1,PPARG,HIF1A,SIRT1,PAK1,ARF6,SMURF2,HDAC5,FN1,STAT5A,ETS1,PTK2B,PRKCE,HDAC6,SRF,ILK,MYH9,NOTCH1,PTP4A3,PDPK1,HMGB1,KIT,ITGB1,HSPB1,BCAR1,RHOA,TGFBR2,STRAP,ERBB4,KDR,PIK3CA,ITGB3,MET
GO:BP	muscle cell development	GO:0055001	7.59E-10	9.119480778	186	618	31	17847	ANKRD1,COMP,MYH6,FHL2,RYR1,TCAP,MYL2,MYOM1,TNNT3,MYH11,ACTA1,SYNPO2L,MYOZ1,VEGFA,SMAD4,HDAC4,CDK1,PIN1,PAK1,ACTG1,MYOD1,BCL2,YY1,SRF,NOTCH1,PDGFRB,ITGB1,PPARA,LMNA,CCNB1,CFLAR
GO:BP	cellular component disassembly	GO:0022411	7.70E-10	9.113471773	546	618	56	17847	NFE2,FRAT2,MRPL14,CKAP5,MRPS11,TOP2A,MRPS30,TGFB3,KLK4,NEK6,MRPL53,SLN,CDKN2A,TP53,MYC,CTNNB1,PRKCA,SMARCA4,TGFBR1,HSPA8,GSK3B,CDK1,HIF1A,PLK1,CSNK2A2,SMURF1,APC,CAV1,PPP1CA,CDC37,SET,SQSTM1,PRKCB,ETS1,INSR,PARK2,VCP,SMARCC1,HDAC6,DCTN1,SPTAN1,UBQLN4,TSG101,IGF1R,GABARAPL2,HMGB1,DVL2,SMARCB1,SMARCE1,PPARGC1A,CDK5,AXIN1,CCNB1,HMGA1,HTT,GABARAP
GO:BP	negative regulation of catalytic activity	GO:0043086	8.80E-10	9.055321419	824	618	72	17847	SERPINA6,PTPN6,STK38,PRKCD,NR4A1,TRIB1,GRM3,MYOCD,MEN1,RAF1,SLN,MIR210,CDKN2A,MYOZ1,VEGFA,TP53,SRC,CSNK2A1,YWHAG,MDM2,ABL1,AKT1,RB1,NFKB1,CBL,PPP2CA,YWHAE,NPM1,PPP2R1A,GSK3B,PPARG,LYN,IKBKB,NCK1,CDKN1A,PRKCZ,PLK1,SIRT1,APP,SFN,TERF1,CASP8,APC,TERF2,CAV1,ARRB1,CEBPA,MCM2,ARRB2,SET,PARK2,PAK2,MAPT,HDAC6,ILK,TSG101,IGF1R,NOTCH1,PDPK1,CSK,ANXA2,KAT2B,IRS2,AKAP9,HRAS,HSPB1,PSEN1,CD2BP2,IQGAP1,PTPRC,UC…
GO:BP	coagulation	GO:0050817	9.14E-10	9.039155776	347	618	43	17847	NFE2,PTPN6,COMP,PRKCD,HBG1,FGG,RAF1,YWHAZ,SRC,HDAC1,MAPK1,PIK3R1,FYN,PRKCA,ACTB,HDAC2,PRKACA,MAPK3,PTPN11,LCK,LYN,JAK2,FLNA,SYK,CDC42,ACTG1,VAV1,CAV1,ARRB1,ARRB2,PRKCB,PRKCE,SRF,ILK,MYH9,PDPK1,ANXA2,CBX5,HSPB1,PSEN1,PRKCG,PIK3CA,ITGB3
GO:BP	negative regulation of cellular response to growth factor stimulus	GO:0090288	9.43E-10	9.025274501	164	618	29	17847	HFE2,NBL1,TGFB3,UBA52,UBC,TP53,SMAD3,SMAD2,ABL1,UBB,RPS27A,TGFBR1,PIN1,SIRT1,STUB1,SMURF1,HGS,SMURF2,CAV1,HSPA5,HSPA1A,NEDD4,SKIL,NOTCH1,PDPK1,DNM2,TGFBR2,STRAP,CFLAR
GO:BP	muscle cell proliferation	GO:0033002	1.02E-09	8.990059189	238	618	35	17847	TRIB1,MYOCD,TGFB3,RXRA,TRAF6,EGFR,JUN,CTNNB1,MAPK1,MDM2,AKT1,STAT3,PRKDC,TGFBR1,STAT1,PPARG,HDAC4,MAPK14,JAK2,CDK1,CDKN1A,XRCC5,PAK1,XRCC6,ILK,MAP3K5,MYB,NOTCH1,PDGFRB,PPARGC1A,DNMT1,TGFBR2,ERBB4,CCNB1,CFLAR
GO:BP	intracellular transport	GO:0046907	1.04E-09	8.983674588	1759	618	119	17847	SNRPF,ACTR1B,TRAM1,CLTA,SAMM50,UBE2D3,RAB8A,PRKCD,BAG3,TXN,ACACA,FOLR1,RAB1B,RPS26,SYNGR1,ATP2A1,CLN5,RAE1,TPR,KIF1A,KLHL21,UBA52,UBC,TP53,YWHAZ,SRC,SMAD3,YWHAG,MAPK1,PIK3R1,FYN,MDM2,AKT1,UBE2D2,STAT3,PRKACA,UBB,MAPK3,PTPN11,CBL,YWHAQ,YWHAB,RPS27A,HDAC3,PML,HSPA8,YWHAE,NPM1,NFKBIA,GSK3B,LYN,TUBB,MAPK14,FLNA,SYK,HSPA4,ERBB2,CDKN1A,HIF1A,PRKCZ,CSNK2A2,APP,DHX9,SFN,SRRM1,RNPS1,SMURF1,TRIM28,CDC42,PA…
GO:BP	regulation of protein localization to nucleus	GO:1900180	1.05E-09	8.978620581	121	618	25	17847	PRKCD,BAG3,MAGED1,TPR,SRC,SMAD3,MAPK1,PIK3R1,FYN,AKT1,SIN3A,HDAC3,PARP1,GSK3B,MAPK14,FLNA,CDK1,PIN1,PLK1,TRIM28,CDH1,TCP1,PSEN1,CCT5,LMNA
GO:BP	peptidyl-lysine modification	GO:0018205	1.07E-09	8.970825174	408	618	47	17847	SIRT2,MYOCD,MEN1,CDKN2A,RAE1,TPR,NSMCE2,EP300,CREBBP,BRCA1,CTNNB1,MDM2,RELA,HDAC2,UBE2I,SMAD4,MAPK3,SIN3A,NCOA1,NCOA3,RUVBL2,SUMO1,SUMO2,HDAC4,SIRT1,RIF1,HTATIP,TRIM28,MYOD1,ARRB1,SET,CHEK1,ATF2,HDAC6,SETDB1,GTF2B,MYB,TAF9,KAT2B,MAP3K7,SUV39H1,SMARCB1,PPARGC1A,DNMT1,TAF1,BRD7,LMNA
GO:BP	muscle system process	GO:0003012	1.08E-09	8.966667521	470	618	51	17847	JSRP1,COMP,MYH6,RYR1,TCAP,MYL2,MYOCD,MYOM1,TNNT3,MYH11,TNNI2,MYBPH,MB,MYBPC2,MYH7,ATP2A1,SLN,MYBPC1,ACTA1,MYOZ1,TNNC2,SMAD3,PRKCA,HDAC2,SMAD4,PRKACA,PARP1,SUMO1,TNFRSF1A,VIM,HDAC4,FLNA,PIN1,CHUK,CDK9,PAK1,CAV1,MYOD1,TNFRSF1B,YY1,SRF,NOTCH1,AKAP9,KIT,PPARA,PPARGC1A,RHOA,LMNA,PIK3CA,CFLAR,ADRBK1
GO:BP	regulation of canonical Wnt signaling pathway	GO:0060828	1.21E-09	8.918952686	293	618	39	17847	RNF220,PSMC2,FOLR1,PSMA5,SRC,HDAC1,EGFR,SMAD3,CTNNB1,NFKB1,MCC,RUVBL2,GSK3B,MAPK14,PIN1,APC,SMURF2,PSMC5,CAV1,PPP1CA,TLE1,PARK2,PSMA1,PSMD4,BTRC,VCP,ILK,PSMD2,NOTCH1,PSMA3,DVL2,PSMC1,PSMD13,PSEN1,AXIN1,PSMC6,PSMA6,DAB2,PSMC4
GO:BP	cell part morphogenesis	GO:0032990	1.23E-09	8.909411439	705	618	65	17847	EFNB1,RAB8A,NBL1,BOC,PLXNB1,TUBB2B,SGK1,WNT7A,VEGFA,GRB2,SRC,EGFR,CTNNB1,MAPK1,PIK3R1,FYN,ABL1,PRKCA,ACTB,SMAD4,UBB,MAPK3,PTPN11,PLCG1,SHC1,SIN3A,GSK3B,ERBB2,PRKCZ,APP,SMURF1,CDC42,PAK1,CREB1,HSP90AA1,YWHAH,BCL2,FN1,NEDD4,PARK2,DISC1,TNIK,MAPT,HDAC6,SRF,SPTAN1,ILK,SKIL,NOTCH1,MAP2K1,SOS1,DNM2,DLG4,GAB2,DVL2,IRS2,SIAH1,ITGB1,PSEN1,CDK5,RHOA,IQGAP1,PIK3CA,BMPR1B,GRB10
GO:BP	brain development	GO:0007420	1.47E-09	8.831479988	743	618	67	17847	NIPBL,SIRT2,BAG3,MEN1,COX17,TACC1,CLN5,WNT7A,KIF1A,TP53,SRC,HDAC1,EGFR,CTNNB1,FYN,ABL1,ACTB,UBB,RARA,PTPN11,PRKDC,YWHAQ,SIN3A,YWHAE,H2AFX,CRK,NCOA1,GSK3B,FLNA,HIF1A,NCOA6,XRCC5,CSNK2A2,APP,ATM,CDC42,PAK1,CREB1,THRA,E2F1,ATXN1,HSPA5,YWHAH,CDH1,BCL2,ARRB2,ETS1,DNCL1,BCR,XRCC6,DISC1,SRF,NOTCH1,CSK,MAP2K1,SNRPB,SOS1,IRS2,ITGB1,PSEN1,PPARGC1A,CDK5,RHOA,TGFBR2,ERBB4,UCHL5,TAF1
GO:BP	hematopoietic stem cell differentiation	GO:0060218	1.54E-09	8.813100133	84	618	21	17847	PSMC2,RUNX1,PSMA5,TP53,ABL1,XRCC5,PSMC5,PSMA1,PSMD4,SRF,MYB,PSMD2,PSMA3,TCF3,ITCH,PSMC1,TAL1,PSMD13,PSMC6,PSMA6,PSMC4
GO:BP	cellular response to radiation	GO:0071478	1.58E-09	8.801052457	191	618	31	17847	NIPBL,TP53,GRB2,EP300,CREBBP,MYC,PIK3R1,MDM2,PCNA,PARP1,H2AFX,NPM1,RUVBL2,MAPK14,CDKN1A,SIRT1,XRCC5,ATM,HSPA5,NEDD4,DDB1,ATR,MGMT,YY1,CHEK1,XRCC6,EEF1D,DNM2,ATF4,HRAS,TAF1
GO:BP	phosphatidylinositol-mediated signaling	GO:0048015	1.58E-09	8.801052457	191	618	31	17847	PTPN6,SIRT2,PLXNB1,PIP5K1C,SRC,EGFR,MAPK1,PIK3R1,FYN,AKT1,MAPK3,PLCG1,CBL,LYN,JAK2,ERBB2,SIRT1,IRS1,NEDD4,INSR,GH1,RPS6KB1,IGF1R,PDGFRB,GAB2,IRS2,KIT,RHOA,ERBB4,KDR,PIK3CA
GO:BP	blood coagulation	GO:0007596	1.74E-09	8.758658632	339	618	42	17847	NFE2,PTPN6,COMP,PRKCD,HBG1,FGG,RAF1,YWHAZ,SRC,HDAC1,MAPK1,PIK3R1,FYN,PRKCA,ACTB,HDAC2,PRKACA,MAPK3,PTPN11,LCK,LYN,JAK2,FLNA,SYK,CDC42,ACTG1,VAV1,CAV1,ARRB1,ARRB2,PRKCB,PRKCE,SRF,ILK,MYH9,PDPK1,ANXA2,CBX5,HSPB1,PRKCG,PIK3CA,ITGB3
GO:BP	regulation of reactive oxygen species metabolic process	GO:2000377	1.83E-09	8.73870178	192	618	31	17847	SIRT2,PRKCD,AATF,TP53,GRB2,EGFR,SMAD3,BRCA1,FYN,AKT1,STAT3,HDAC4,MAPK14,JAK2,SYK,CDKN1A,HIF1A,CAV1,HSP90AA1,BCL2,BCR,INSR,PARK2,PTK2B,MAPT,HDAC6,PDGFRB,DNM2,RHOA,TGFBR2,CFLAR
GO:BP	positive regulation of protein localization to nucleus	GO:1900182	1.92E-09	8.7167614	76	618	20	17847	PRKCD,BAG3,TPR,SRC,SMAD3,MAPK1,PIK3R1,FYN,AKT1,HDAC3,PARP1,MAPK14,FLNA,CDK1,PLK1,TRIM28,CDH1,TCP1,PSEN1,CCT5
GO:BP	canonical Wnt signaling pathway	GO:0060070	1.93E-09	8.715476281	340	618	42	17847	RNF220,FRAT2,PSMC2,FOLR1,WNT7A,PSMA5,SRC,HDAC1,EGFR,SMAD3,CTNNB1,NFKB1,MCC,RUVBL2,GSK3B,MAPK14,PIN1,APC,SMURF2,PSMC5,CAV1,PPP1CA,TLE1,PARK2,PSMA1,PSMD4,BTRC,VCP,DISC1,ILK,PSMD2,NOTCH1,PSMA3,DVL2,PSMC1,PSMD13,PSEN1,AXIN1,PSMC6,PSMA6,DAB2,PSMC4
GO:BP	DNA geometric change	GO:0032392	2.01E-09	8.696840363	114	618	24	17847	RFC4,TOP2A,UBA52,UBC,TP53,UBB,RPS27A,PARP1,RUVBL2,MCM7,XRCC5,MCM3,DHX9,CHD3,MCM2,DDB1,XRCC6,MCM5,MCM6,HMGB1,CHD4,CUL4A,HMGA1,GTF2F2
GO:BP	regulation of response to DNA damage stimulus	GO:2001020	2.12E-09	8.673156777	218	618	33	17847	ANKRD1,PRKCD,TP53,MYC,EGFR,BRCA1,MDM2,ABL1,PCNA,PRKDC,PARP1,PML,H2AFX,SIRT1,RIF1,DHX9,CDK9,ATM,TRIM28,TERF2,BCL2,ATR,MGMT,CHEK1,MAPT,UBQLN4,SKIL,HMGB1,RPA2,TAF9,CUL4A,FUS,PRKCG
GO:BP	pri-miRNA transcription by RNA polymerase II	GO:0061614	2.14E-09	8.670264547	45	618	16	17847	FOS,TP53,SMAD3,JUN,NR3C1,RELA,SMAD4,STAT3,SMARCA4,PPARG,HDAC4,HIF1A,ETS1,YY1,SRF,PPARA
GO:BP	regulation of protein modification by small protein conjugation or removal	GO:1903320	2.17E-09	8.663623841	231	618	34	17847	AIMP2,CDKN2A,TRAF6,BRCA1,CTNNB1,FYN,ABL1,AKT1,RELA,UBE2I,UBB,HDAC3,TGFBR1,HDAC4,DAXX,PIN1,PLK1,STUB1,CDK9,CAV1,HSP90AA1,HSPA5,HSPA1A,ARRB1,ARRB2,PARK2,VCP,PRKCE,ITCH,PSEN1,CDK5,PRKCG,AXIN1,TAF1
GO:BP	peptidyl-threonine modification	GO:0018210	2.28E-09	8.642135692	125	618	25	17847	SIRT2,PRKCD,CSNK2A1,MAPK1,AKT1,PRKCA,PRKACA,TGFBR1,GSK3B,CDK1,PLK1,CSNK2A2,APP,MAPK8,BCL2,PRKCB,CHEK1,TBK1,PDPK1,MAP2K1,CDK5,TGFBR2,AXIN1,TAF1,ADRBK1
GO:BP	developmental process involved in reproduction	GO:0003006	2.34E-09	8.631547687	680	618	63	17847	TMEM119,CSDA,NPHP1,NIPBL,SIRT2,MYOCD,MEN1,RXRA,RPS6KA2,EPAS1,WNT7A,TSPY2,VEGFA,ESR1,GRB2,SRC,AR,EGFR,CTNNB1,MAPK1,AKT1,SMAD4,PRKACA,UBB,RARA,MAPK3,PTPN11,PRKDC,CBL,TGFBR1,NCOA1,PPP2R1A,PPARG,CEBPB,MAPK14,FLNA,HIF1A,SIRT1,VDR,ATM,CASP8,TRIM28,ZBTB16,HSPA5,BCL2,ARRB1,CEBPA,FANCA,ARRB2,CCND1,MLH1,INSR,PTK2B,SMARCC1,NRIP1,DDX20,NOTCH1,PDGFRB,PHB2,MAP2K1,KIT,CCNB1,BMPR1B
GO:BP	inositol lipid-mediated signaling	GO:0048017	2.42E-09	8.615295081	194	618	31	17847	PTPN6,SIRT2,PLXNB1,PIP5K1C,SRC,EGFR,MAPK1,PIK3R1,FYN,AKT1,MAPK3,PLCG1,CBL,LYN,JAK2,ERBB2,SIRT1,IRS1,NEDD4,INSR,GH1,RPS6KB1,IGF1R,PDGFRB,GAB2,IRS2,KIT,RHOA,ERBB4,KDR,PIK3CA
GO:BP	axon development	GO:0061564	2.53E-09	8.597544708	529	618	54	17847	EFNB1,RAB8A,BOC,PLXNB1,TUBB2B,FOLR1,WNT7A,VEGFA,GRB2,SRC,JUN,MAPK1,PIK3R1,FYN,ABL1,PRKCA,ACTB,SMAD4,MAPK3,PTPN11,PLCG1,SHC1,SIN3A,GSK3B,JAK2,ERBB2,APP,PAK1,CREB1,HSP90AA1,BCL2,FN1,DISC1,MAPT,HDAC6,SRF,SPTAN1,ILK,SKIL,NOTCH1,MAP2K1,SOS1,DNM2,GAB2,IRS2,SIAH1,STK24,ITGB1,PSEN1,CDK5,RHOA,PIK3CA,BMPR1B,GRB10
GO:BP	heart morphogenesis	GO:0003007	2.64E-09	8.578795398	259	618	36	17847	COL2A1,ANKRD1,MYH6,FHL2,NIPBL,RYR1,TCAP,MYL2,MYOM1,RXRA,CLDN5,FOLR1,XIRP2,MYH7,SOX11,SYNPO2L,VEGFA,TP53,SMAD3,JUN,CTNNB1,MDM2,SMAD4,RARA,TGFBR1,HIF1A,INSR,ATF2,SRF,ILK,NOTCH1,SOS1,DVL2,PSEN1,TGFBR2,MDM4
GO:BP	positive regulation of cell activation	GO:0050867	2.66E-09	8.574835127	403	618	46	17847	PTPN6,EFNB1,TSLP,CD320,RUNX1,GRB2,SRC,TRAF6,PIK3R1,FYN,AKT1,RARA,PTPN11,LCK,LYN,NCK1,JAK2,SYK,CDKN1A,PRKCZ,RIF1,CDC42,PAK1,ZBTB16,VAV1,CAV1,BCL2,CEBPA,MLH1,PAK2,MYB,BTK,PDGFRB,PDPK1,CSK,HMGB1,ZAP70,GAB2,IRS2,RHOA,TGFBR2,PTPRC,TNFRSF14,PIK3CA,FADD,JAK3
GO:BP	hemostasis	GO:0007599	2.85E-09	8.544533967	344	618	42	17847	NFE2,PTPN6,COMP,PRKCD,HBG1,FGG,RAF1,YWHAZ,SRC,HDAC1,MAPK1,PIK3R1,FYN,PRKCA,ACTB,HDAC2,PRKACA,MAPK3,PTPN11,LCK,LYN,JAK2,FLNA,SYK,CDC42,ACTG1,VAV1,CAV1,ARRB1,ARRB2,PRKCB,PRKCE,SRF,ILK,MYH9,PDPK1,ANXA2,CBX5,HSPB1,PRKCG,PIK3CA,ITGB3
GO:BP	regulation of morphogenesis of an epithelium	GO:1905330	2.86E-09	8.542961995	183	618	30	17847	PSMC2,RXRA,MAGED1,WNT7A,PSMA5,VEGFA,ESR1,AR,CTNNB1,ABL1,STAT1,SMURF1,CDC42,SMURF2,PSMC5,ARRB2,PSMA1,PSMD4,CLTC,PSMD2,PHB2,PSMA3,DVL2,PSMC1,PSMD13,RHOA,PSMC6,PSMA6,DAB2,PSMC4
GO:BP	positive regulation of protein catabolic process	GO:0045732	3.13E-09	8.503772732	221	618	33	17847	SIRT2,TRIB1,PSMC2,CSNK2A1,MDM2,AKT1,GSK3B,SUMO1,SUMO2,PLK1,STUB1,SMURF1,APC,SMURF2,CAV1,HSP90AA1,HSPA1A,CEBPA,NEDD4,DDB1,TNFRSF1B,PARK2,PTK2B,VCP,DISC1,ITCH,PSMC1,BARD1,PSEN1,AXIN1,TAF1,DAB2,PSMC4
GO:BP	regulation of hydrolase activity	GO:0051336	3.16E-09	8.500575116	1289	618	95	17847	SERPINA6,NR1H2,MYH6,PRKCD,NR4A1,PLXNB1,TNNT3,TIAM2,RAF1,CDKN2A,MYOZ1,FGD5,VEGFA,TP53,ESR1,SRC,HDAC1,MYC,EGFR,SMAD3,JUN,CSNK2A1,FYN,MDM2,ABL1,AKT1,STAT3,PCNA,MAPK3,PLCG1,LCK,PML,YWHAE,NPM1,PPP2R2B,CRK,PPP2R1A,GSK3B,PPARG,LYN,IKBKB,MAPK14,JAK2,SYK,ERBB2,PIN1,PRKCZ,SIRT1,APP,DHX9,SFN,TERF1,MAPK8,CASP8,VAV1,TERF2,CAV1,HSPA1A,CHM,ARRB1,MCM2,FN1,ARRB2,SET,DNCL1,BCR,MGMT,PTK2B,PAK2,VCP,MAPT,MAP3K5,PDGFR…
GO:BP	actomyosin structure organization	GO:0031032	3.21E-09	8.493582395	196	618	31	17847	ANKRD1,MYH6,PPFIA1,TCAP,MYL2,MYOM1,TNNT3,TGFB3,MYH11,ACTA1,SYNPO2L,MYOZ1,SRC,SMAD3,PIK3R1,ABL1,SMAD4,TGFBR1,EPB41,CDC42,PAK1,ACTG1,ARRB1,PTK2B,SRF,MYH9,PDGFRB,ITGB1,RHOA,MET,CFLAR
GO:BP	MyD88-independent toll-like receptor signaling pathway	GO:0002756	3.27E-09	8.485172216	33	618	14	17847	UBE2D3,UBA52,UBC,IKBKG,IKBKE,UBE2D2,UBB,RPS27A,IKBKB,CHUK,CASP8,TBK1,PRKCE,FADD
GO:BP	regulation of autophagy	GO:0010506	3.32E-09	8.478466412	331	618	41	17847	TPCN1,RUFY4,ATP6V1B2,RAB8A,SIRT2,BAG3,RAB1B,TP53,EP300,IKBKG,ABL1,AKT1,STAT3,PRKACA,MAPK3,GSK3B,EEF1A1,HIF1A,SIRT1,PRKAB1,CSNK2A2,HTATIP,SMURF1,ATM,MAPK8,BCL2,CDC37,NEDD4,PARK2,TBK1,MAPT,HDAC6,UBQLN4,HMGB1,MAP3K7,HSPB1,CDK5,KDR,PIK3CA,MET,HTT
GO:BP	secretion	GO:0046903	3.78E-09	8.422798758	1686	618	114	17847	ACTR1B,PTPN6,ANKRD1,ATP6AP2,COMP,RAB8A,PPFIA1,PRKCD,TSLP,S100P,PSMC2,PLA2G2A,MYOM1,HFE,TGFB3,CSN3,CHRNA4,CAP1,FGG,SYNGR1,PIP5K1C,PANX3,DERA,SOX11,RAF1,SGK1,WNT7A,FBXL20,COMMD3,PSMA5,DOK3,VEGFA,SRC,TRAF6,EGFR,SMAD2,MAPK1,ABL1,PRKCA,SMAD4,NFKB1,MAPK3,PTPN11,CBL,PML,HSPA8,NCOR2,NCOA1,GSK3B,EEF1A1,TNFRSF1A,LYN,TUBB,MAPK14,JAK2,FLNA,SYK,HIF1A,PRKCZ,XRCC5,VDR,APP,IRS1,CHUK,DHX9,PAK1,HGS,ARF6,CREB1,CAV1…
GO:BP	immune effector process	GO:0002252	3.79E-09	8.420874715	1273	618	94	17847	RORC,ACTR1B,PTPN6,ATP6AP2,PRKCD,S100P,PSMC2,HFE,IFI44L,TGFB3,IRF5,CAP1,SYNGR1,DERA,COMMD3,PSMA5,DOK3,TP53,GRB2,SRC,TRAF6,MAPK1,PIK3R1,FYN,ABL1,ACTB,RELA,NFKB1,STAT3,RARA,MAPK3,PRKDC,PLCG1,CBL,SIN3A,PML,HSPA8,STAT1,CRK,EEF1A1,LYN,TUBB,NCK1,MAPK14,FLNA,SYK,PRKCZ,XRCC5,MAP3K14,APP,RIF1,DHX9,CDC42,PAK1,ACTG1,VAV1,HSP90AA1,HSPA1A,BCL2,ARRB2,MLH1,TNFRSF1B,DNCL1,BCR,AIRE,PTK2B,TBK1,VCP,PRKCE,XRCC6,SPTAN…
GO:BP	tissue migration	GO:0090130	3.90E-09	8.409026175	362	618	43	17847	S100P,NR4A1,WNT7A,MIR210,ACTA1,VEGFA,SRC,JUN,ABL1,AKT1,PRKCA,SP1,MCC,PTPN11,PLCG1,TGFBR1,PPARG,HIF1A,SIRT1,ARF6,HDAC5,STAT5A,ETS1,PTK2B,PRKCE,HDAC6,SRF,MYH9,NOTCH1,PTP4A3,PDPK1,HMGB1,KIT,ITGB1,HSPB1,BCAR1,RHOA,TGFBR2,STRAP,KDR,PIK3CA,ITGB3,MET
GO:BP	regulation of cell cycle G1/S phase transition	GO:1902806	4.23E-09	8.373526213	198	618	31	17847	PTPN6,MEN1,CDKN2A,CDK2AP2,CTDSP2,TP53,EP300,EGFR,MDM2,AKT1,RB1,PCNA,PRKDC,PML,CDK1,CDKN1A,SFN,ATM,E2F1,CDK4,BCL2,CCND1,RBL1,PHB2,RPA2,CUL4A,CARM1,MDM4,TAF1,BRD7,CCNB1
GO:BP	regulation of nervous system development	GO:0051960	4.41E-09	8.35588626	945	618	77	17847	ANKRD1,PMP22,NIPBL,NBL1,SIRT2,PLXNB1,TUBB2B,BHLHB3,SOX11,WNT7A,MIR210,VEGFA,TP53,YWHAZ,EP300,HDAC1,YWHAG,CTNNB1,FYN,MDM2,ABL1,AKT1,RELA,HDAC2,STAT3,PRKACA,RARA,SIN3A,CRK,NCOA1,GSK3B,PPARG,LYN,VIM,NCK1,FLNA,CDK1,HIF1A,XRCC5,APP,SMURF1,THRB,PAK1,ARF6,CREB1,E2F1,HSPA5,YWHAH,BCL2,FN1,NEDD4,SF3A2,TNFRSF1B,PARK2,PTK2B,DISC1,TNIK,MAPT,SRF,ILK,SKIL,MYB,NOTCH1,MAP2K1,DNM2,DLG4,DVL2,TCF3,STK24,KIT,PSEN1,CA…
GO:BP	negative regulation of cell cycle G1/S phase transition	GO:1902807	4.79E-09	8.319430472	129	618	25	17847	MEN1,CDKN2A,CDK2AP2,CTDSP2,TP53,EP300,MDM2,RB1,PCNA,PRKDC,PML,CDK1,CDKN1A,SFN,ATM,E2F1,CDK4,BCL2,CCND1,RBL1,RPA2,CARM1,MDM4,BRD7,CCNB1
GO:BP	regulation of myeloid cell differentiation	GO:0045637	5.60E-09	8.25217573	252	618	35	17847	NFE2,TRIB1,FOS,RUNX1,EP300,CREBBP,TRAF6,HDAC1,MYC,JUN,CTNNB1,PIK3R1,RB1,PRKCA,STAT3,RARA,SIN3A,STAT1,NFKBIA,CEBPB,LYN,MAPK14,HIF1A,CASP8,ZBTB16,CREB1,HSPA1A,PRKCB,ETS1,PTK2B,STAT5B,KAT2B,TAL1,CUL4A,FADD
GO:BP	regulation of DNA biosynthetic process	GO:2000278	5.73E-09	8.241556346	109	618	23	17847	ANKRD1,MEN1,RFC4,TP53,SRC,MYC,CTNNB1,MAPK1,MAPK3,PPARG,CDKN1A,XRCC5,TERF1,ATM,TERF2,HSP90AA1,ARRB2,ATR,PTK2B,HNRPA1,PDGFRB,TCP1,CCT5
GO:BP	phosphatidylinositol 3-kinase signaling	GO:0014065	6.46E-09	8.189712286	153	618	27	17847	PTPN6,SIRT2,PLXNB1,PIP5K1C,SRC,EGFR,MAPK1,PIK3R1,FYN,AKT1,MAPK3,CBL,LYN,JAK2,ERBB2,SIRT1,IRS1,NEDD4,INSR,GH1,IGF1R,PDGFRB,IRS2,KIT,ERBB4,KDR,PIK3CA
GO:BP	epithelial cell migration	GO:0010631	6.76E-09	8.170071259	353	618	42	17847	S100P,NR4A1,WNT7A,MIR210,VEGFA,SRC,JUN,ABL1,AKT1,PRKCA,SP1,MCC,PTPN11,PLCG1,TGFBR1,PPARG,HIF1A,SIRT1,ARF6,HDAC5,STAT5A,ETS1,PTK2B,PRKCE,HDAC6,SRF,MYH9,NOTCH1,PTP4A3,PDPK1,HMGB1,KIT,ITGB1,HSPB1,BCAR1,RHOA,TGFBR2,STRAP,KDR,PIK3CA,ITGB3,MET
GO:BP	cardiocyte differentiation	GO:0035051	6.85E-09	8.164345182	165	618	28	17847	MYH6,FHL2,TCAP,MYL2,MYOCD,MYOM1,RXRA,MYH11,FOLR1,VEGFA,EGFR,MAPK1,SMAD4,RARA,MAPK3,CDK1,PIN1,PAK1,ARRB2,YY1,SRF,NOTCH1,PDGFRB,ANXA2,ITGB1,PPARA,LMNA,CCNB1
GO:BP	vasculature development	GO:0001944	7.02E-09	8.153666205	805	618	69	17847	COMP,FMNL3,NR4A1,MYOCD,ADIPOR2,CLDN5,APLNR,FOLR1,EPAS1,VEZF1,RUNX1,WNT7A,MIR210,VEGFA,JUN,BRCA1,CTNNB1,MAPK1,MDM2,ABL1,AKT1,PRKCA,SP1,STAT3,PLCG1,SHC1,PML,TGFBR1,STAT1,PPARG,SMAD1,MAPK14,SYK,ERBB2,HIF1A,SIRT1,CDC42,HGS,CAV1,HDAC5,JAK1,FN1,PRKCB,ETS1,NCL,PTK2B,ATF2,SRF,MYH9,NOTCH1,PDGFRB,PDPK1,MAP2K1,ANXA2,SOS1,DNM2,FASLG,TAL1,KIT,ITGB1,HSPB1,PSEN1,DNMT1,RHOA,TGFBR2,KDR,PIK3CA,ITGB3,CFLAR
GO:BP	JNK cascade	GO:0007254	7.55E-09	8.122291831	215	618	32	17847	TRIB1,MEN1,WNT7A,UBA52,UBC,TRAF6,EGFR,IKBKG,AKT1,UBB,NCOR1,RPS27A,HDAC3,DAXX,SYK,APP,MAPK8,CDC42,PAK1,COPS5,PARK2,PTK2B,TNIK,MAP3K5,IGF1R,HMGB1,DVL2,ITCH,MAP3K7,HRAS,GADD45G,AXIN1
GO:BP	blood vessel development	GO:0001568	7.58E-09	8.120142634	770	618	67	17847	COMP,FMNL3,NR4A1,MYOCD,ADIPOR2,CLDN5,APLNR,FOLR1,EPAS1,VEZF1,RUNX1,WNT7A,MIR210,VEGFA,JUN,BRCA1,CTNNB1,MAPK1,MDM2,ABL1,AKT1,PRKCA,SP1,STAT3,PLCG1,SHC1,PML,TGFBR1,STAT1,PPARG,SMAD1,MAPK14,SYK,ERBB2,HIF1A,SIRT1,CDC42,HGS,CAV1,HDAC5,JAK1,FN1,PRKCB,ETS1,NCL,PTK2B,ATF2,SRF,MYH9,NOTCH1,PDGFRB,PDPK1,MAP2K1,ANXA2,SOS1,DNM2,FASLG,TAL1,ITGB1,HSPB1,PSEN1,RHOA,TGFBR2,KDR,PIK3CA,ITGB3,CFLAR
GO:BP	positive regulation of proteolysis involved in cellular protein catabolic process	GO:1903052	7.87E-09	8.104108731	121	618	24	17847	SIRT2,TRIB1,PSMC2,MDM2,AKT1,GSK3B,SUMO1,SUMO2,PLK1,STUB1,SMURF1,CAV1,HSPA1A,CEBPA,PARK2,PTK2B,VCP,DISC1,PSMC1,PSEN1,AXIN1,TAF1,DAB2,PSMC4
GO:BP	angiogenesis	GO:0001525	7.91E-09	8.102069966	595	618	57	17847	FMNL3,NR4A1,ADIPOR2,CLDN5,APLNR,EPAS1,VEZF1,RUNX1,WNT7A,MIR210,VEGFA,JUN,BRCA1,CTNNB1,ABL1,AKT1,PRKCA,SP1,STAT3,PLCG1,SHC1,PML,TGFBR1,STAT1,PPARG,SMAD1,MAPK14,SYK,ERBB2,HIF1A,SIRT1,CDC42,HGS,CAV1,HDAC5,JAK1,FN1,PRKCB,ETS1,NCL,PTK2B,ATF2,SRF,MYH9,NOTCH1,PDGFRB,PDPK1,ANXA2,FASLG,TAL1,ITGB1,HSPB1,RHOA,TGFBR2,KDR,PIK3CA,ITGB3
GO:BP	TRIF-dependent toll-like receptor signaling pathway	GO:0035666	8.82E-09	8.054609107	29	618	13	17847	UBE2D3,UBA52,UBC,IKBKG,IKBKE,UBE2D2,UBB,RPS27A,IKBKB,CHUK,CASP8,TBK1,FADD
GO:BP	regulation of chromatin organization	GO:1902275	8.91E-09	8.050100649	191	618	30	17847	NIPBL,MYOCD,TPR,VEGFA,TP53,BRCA1,CTNNB1,SMAD4,MAPK3,SIN3A,RUVBL2,SIRT1,RIF1,CDK9,ATM,MAPK8,TRIM28,ARRB1,SET,CHEK1,SETDB1,MYB,TAL1,SMARCB1,PPARGC1A,DNMT1,BRD7,LMNA,CCNB1,HMGA1
GO:BP	epithelium migration	GO:0090132	8.95E-09	8.04827532	356	618	42	17847	S100P,NR4A1,WNT7A,MIR210,VEGFA,SRC,JUN,ABL1,AKT1,PRKCA,SP1,MCC,PTPN11,PLCG1,TGFBR1,PPARG,HIF1A,SIRT1,ARF6,HDAC5,STAT5A,ETS1,PTK2B,PRKCE,HDAC6,SRF,MYH9,NOTCH1,PTP4A3,PDPK1,HMGB1,KIT,ITGB1,HSPB1,BCAR1,RHOA,TGFBR2,STRAP,KDR,PIK3CA,ITGB3,MET
GO:BP	lymphocyte differentiation	GO:0030098	9.82E-09	8.008004061	357	618	42	17847	RORC,LRRC8A,PTPN6,RUNX2,RUNX1,CDKN2A,TP53,EP300,CTNNB1,PIK3R1,ABL1,STAT3,RARA,PRKDC,LCK,HDAC4,SYK,ERBB2,PRKCZ,ATM,ZBTB16,VAV1,HDAC5,BCL2,FANCA,AIRE,PTK2B,SRF,MYB,BTK,BCL3,HMGB1,ZAP70,SOS1,TCF3,KIT,ITGB1,RHOA,TGFBR2,PTPRC,FADD,JAK3
GO:BP	positive regulation of leukocyte activation	GO:0002696	1.05E-08	7.978828751	388	618	44	17847	PTPN6,EFNB1,TSLP,CD320,RUNX1,GRB2,SRC,TRAF6,PIK3R1,FYN,AKT1,RARA,PTPN11,LCK,LYN,NCK1,SYK,CDKN1A,PRKCZ,RIF1,CDC42,PAK1,ZBTB16,VAV1,CAV1,BCL2,CEBPA,MLH1,PAK2,MYB,BTK,PDPK1,CSK,HMGB1,ZAP70,GAB2,IRS2,RHOA,TGFBR2,PTPRC,TNFRSF14,PIK3CA,FADD,JAK3
GO:BP	response to nutrient levels	GO:0031667	1.06E-08	7.973633171	499	618	51	17847	SIRT2,ADIPOR2,HFE,FOLR1,ASNS,DAD1,TP53,SRC,EGFR,JUN,MAPK1,FYN,MDM2,AKT1,RELA,RARA,PCNA,MAPK3,CBL,HSPA8,STAT1,NCOA1,PPARG,CDKN1A,SIRT1,VDR,MAPK8,CREB1,HSPA5,MYOD1,BCL2,CCND1,MGMT,HNRPA1,GH1,RPS6KB1,SRF,SETDB1,MAP3K5,GABARAPL2,MAX,ATF4,STK24,PPARA,PPARGC1A,ATF3,TGFBR2,PRKCG,TAF1,FAS,GABARAP
GO:BP	positive regulation of lymphocyte activation	GO:0051251	1.07E-08	7.97247743	343	618	41	17847	PTPN6,EFNB1,CD320,RUNX1,GRB2,SRC,TRAF6,PIK3R1,FYN,AKT1,RARA,PTPN11,LCK,LYN,NCK1,SYK,CDKN1A,PRKCZ,RIF1,CDC42,PAK1,ZBTB16,VAV1,CAV1,BCL2,MLH1,PAK2,MYB,BTK,PDPK1,CSK,HMGB1,ZAP70,IRS2,RHOA,TGFBR2,PTPRC,TNFRSF14,PIK3CA,FADD,JAK3
GO:BP	cellular response to reactive oxygen species	GO:0034614	1.08E-08	7.967612187	168	618	28	17847	PRKCD,TXN,FOS,SRC,EGFR,JUN,MAPK1,MDM2,ABL1,AKT1,RELA,HDAC2,PCNA,MAPK3,CRK,CDK1,SIRT1,CHUK,MAPK8,ETS1,MAPT,HDAC6,MAP3K5,MYB,BTK,DNM2,MET,CFLAR
GO:BP	negative regulation of G1/S transition of mitotic cell cycle	GO:2000134	1.14E-08	7.942931517	123	618	24	17847	CDKN2A,CDK2AP2,CTDSP2,TP53,EP300,MDM2,RB1,PCNA,PRKDC,PML,CDK1,CDKN1A,SFN,ATM,E2F1,CDK4,BCL2,CCND1,RBL1,RPA2,CARM1,MDM4,BRD7,CCNB1
GO:BP	signal transduction involved in cell cycle checkpoint	GO:0072395	1.16E-08	7.934786037	74	618	19	17847	SOX11,TP53,EP300,BRCA1,MDM2,PCNA,PRKDC,PML,CDK1,CDKN1A,PLK1,SFN,ATM,E2F1,CHEK1,CDC5L,CARM1,MDM4,CCNB1
GO:BP	maintenance of location	GO:0051235	1.17E-08	7.931453864	344	618	41	17847	TPCN1,JSRP1,PTPN6,NR1H2,NBL1,RYR1,TXN,APLNR,FLNB,ATP2A1,IKBKE,ABL1,AKT1,NFKB1,PRKACA,PLCG1,LCK,YWHAB,PML,NFKBIA,PPARG,LYN,FLNA,SIRT1,CAV1,HSPA5,PTK2B,PRKCE,NRIP1,PDPK1,BCL3,FASLG,AKAP9,BARD1,PPARA,CDK5,PTPRC,ITGB3,HTT,NFKBIE,NR1H3
GO:BP	cardiovascular system development	GO:0072358	1.17E-08	7.930760061	814	618	69	17847	COMP,FMNL3,NR4A1,MYOCD,ADIPOR2,CLDN5,APLNR,FOLR1,EPAS1,VEZF1,RUNX1,WNT7A,MIR210,VEGFA,JUN,BRCA1,CTNNB1,MAPK1,MDM2,ABL1,AKT1,PRKCA,SP1,STAT3,PLCG1,SHC1,PML,TGFBR1,STAT1,PPARG,SMAD1,MAPK14,SYK,ERBB2,HIF1A,SIRT1,CDC42,HGS,CAV1,HDAC5,JAK1,FN1,PRKCB,ETS1,NCL,PTK2B,ATF2,SRF,MYH9,NOTCH1,PDGFRB,PDPK1,MAP2K1,ANXA2,SOS1,DNM2,FASLG,TAL1,KIT,ITGB1,HSPB1,PSEN1,DNMT1,RHOA,TGFBR2,KDR,PIK3CA,ITGB3,CFLAR
GO:BP	positive regulation of Wnt signaling pathway	GO:0030177	1.23E-08	7.909492695	181	618	29	17847	RNF220,ATP6AP2,PSMC2,PSMA5,SRC,EGFR,SMAD3,CSNK2A1,ABL1,NFKB1,SMARCA4,PIN1,SMURF2,PSMC5,CAV1,PSMA1,PSMD4,VCP,DISC1,ILK,PSMD2,PSMA3,PSMC1,PSMD13,AXIN1,PSMC6,PSMA6,DAB2,PSMC4
GO:BP	regulation of carbohydrate metabolic process	GO:0006109	1.23E-08	7.909158454	206	618	31	17847	RORC,PFKFB4,MIR210,RAE1,TPR,TP53,SRC,EP300,AKT1,NFKB1,STAT3,NCOR1,GSK3B,HDAC4,HIF1A,SIRT1,APP,IRS1,PPP1CA,DDB1,NCOA2,INSR,PARK2,PTK2B,PRKCE,CLTC,KAT2B,IRS2,PPARA,PSEN1,PPARGC1A
GO:BP	cardiac muscle tissue development	GO:0048738	1.23E-08	7.908479165	232	618	33	17847	ANKRD1,MYH6,FHL2,TCAP,MYL2,MYOCD,MYOM1,RXRA,MYH11,XIRP2,MYH7,VEGFA,MAPK1,SMAD4,RARA,TGFBR1,MAPK14,CDK1,PIN1,CDC42,PAK1,CREB1,ARRB2,YY1,SRF,NOTCH1,PDGFRB,ITGB1,PPARA,TGFBR2,ERBB4,LMNA,CCNB1
GO:BP	cell cycle checkpoint	GO:0000075	1.25E-08	7.902320631	219	618	32	17847	TOP2A,SOX11,TPR,TP53,EP300,BRCA1,MDM2,RB1,PCNA,PTPN11,PRKDC,PML,H2AFX,MAPK14,CDK1,CDKN1A,PLK1,SFN,ATM,APC,E2F1,CCND1,ATR,CHEK1,CDC5L,ATF2,RPA2,HRAS,CUL4A,CARM1,MDM4,CCNB1
GO:BP	regulation of cysteine-type endopeptidase activity involved in apoptotic process	GO:0043281	1.25E-08	7.902320631	219	618	32	17847	NR4A1,RAF1,CDKN2A,VEGFA,SRC,MYC,SMAD3,CSNK2A1,MDM2,AKT1,LCK,PML,YWHAE,PPARG,JAK2,SYK,SIRT1,SFN,CASP8,ARRB1,ARRB2,MGMT,PAK2,VCP,MAPT,MAP3K5,HMGB1,FASLG,RHOA,FAS,CFLAR,FADD
GO:BP	axonogenesis	GO:0007409	1.26E-08	7.898064961	485	618	50	17847	EFNB1,RAB8A,BOC,PLXNB1,TUBB2B,WNT7A,VEGFA,GRB2,SRC,MAPK1,PIK3R1,FYN,ABL1,PRKCA,ACTB,SMAD4,MAPK3,PTPN11,PLCG1,SHC1,SIN3A,GSK3B,ERBB2,APP,PAK1,CREB1,HSP90AA1,BCL2,FN1,DISC1,MAPT,HDAC6,SRF,SPTAN1,ILK,SKIL,NOTCH1,MAP2K1,SOS1,DNM2,GAB2,IRS2,SIAH1,ITGB1,PSEN1,CDK5,RHOA,PIK3CA,BMPR1B,GRB10
GO:BP	DNA damage checkpoint	GO:0000077	1.33E-08	7.877669934	146	618	26	17847	TP53,EP300,BRCA1,MDM2,PCNA,PTPN11,PRKDC,PML,H2AFX,MAPK14,CDK1,CDKN1A,PLK1,SFN,ATM,E2F1,CCND1,ATR,CHEK1,CDC5L,ATF2,RPA2,CUL4A,CARM1,MDM4,CCNB1
GO:BP	negative regulation of catabolic process	GO:0009895	1.33E-08	7.875864093	316	618	39	17847	CSDA,SIRT2,HFE,CDKN2A,TP53,EGFR,SMAD3,CSNK2A1,FYN,AKT1,RELA,STAT3,PML,HDAC4,MAPK14,FLNA,PIN1,CSNK2A2,DHX9,E2F1,BCL2,SMARCC1,USP7,UBQLN4,ANXA2,GABARAPL2,TAF9,PABPC1,PPARA,PHB,PSEN1,PPARGC1A,FUS,PRKCG,MDM4,UCHL5,TAF1,PIK3CA,MET
GO:BP	organic substance transport	GO:0071702	1.33E-08	7.875211383	2893	618	166	17847	TRAM1,CLTA,SAMM50,LRRC8A,UBE2D3,SLC13A5,ANKRD1,COMP,NR1H2,ATP6V1B2,RAB8A,PPFIA1,PRKCD,TSLP,BAG3,PLA2G2A,SLC38A10,CD320,TXN,MYOM1,CKAP5,ADIPOR2,HFE,ACACA,SLC3A2,TGFB3,RXRA,SLC25A22,FOLR1,SLC36A2,CHRNA4,RAB1B,RPS26,FGG,SYNGR1,PANX3,RAF1,RAE1,TPR,KIF1A,UBA52,UBC,TP53,YWHAZ,SRC,TRAF6,EGFR,SMAD3,SMAD2,YWHAG,MAPK1,PIK3R1,FYN,MDM2,ABL1,AKT1,UBE2D2,PRKCA,ACTB,NFKB1,STAT3,PRKACA,UBB,MAPK3,PTPN11,NCOR1,YWH…
GO:BP	peptidyl-tyrosine autophosphorylation	GO:0038083	1.38E-08	7.860762281	36	618	14	17847	VEGFA,SRC,EGFR,FYN,ABL1,MAPK3,LCK,LYN,CAV1,INSR,PTK2B,IGF1R,IQGAP1,KDR
GO:BP	regulation of neuron apoptotic process	GO:0043523	1.42E-08	7.848180833	220	618	32	17847	TGFB3,TP53,JUN,CTNNB1,FYN,PARP1,CEBPB,HDAC4,JAK2,PIN1,HIF1A,ATM,CDC42,BCL2,ARRB1,ARRB2,SET,PARK2,PTK2B,ATF2,ILK,MYB,PDPK1,FASLG,ATF4,HRAS,PSEN1,PPARGC1A,CDK5,RHOA,PRKCG,PIK3CA
GO:BP	DNA integrity checkpoint	GO:0031570	1.42E-08	7.847620046	158	618	27	17847	TOP2A,TP53,EP300,BRCA1,MDM2,PCNA,PTPN11,PRKDC,PML,H2AFX,MAPK14,CDK1,CDKN1A,PLK1,SFN,ATM,E2F1,CCND1,ATR,CHEK1,CDC5L,ATF2,RPA2,CUL4A,CARM1,MDM4,CCNB1
GO:BP	regulation of circadian rhythm	GO:0042752	1.54E-08	7.812848452	114	618	23	17847	RORC,TOP2A,MAGED1,TP53,PRKDC,SIN3A,HDAC3,PML,GSK3B,PPARG,CDK1,MAPK8,CREB1,PPP1CA,DDB1,BTRC,USP7,SFPQ,SUV39H1,PPARA,PPARGC1A,PRKCG,NR1H3
GO:BP	response to estradiol	GO:0032355	1.64E-08	7.785086114	136	618	25	17847	H2AFZ,WNT7A,DDX18,ESR1,EGFR,CTNNB1,STAT3,RARA,PCNA,NCOR2,NCOA1,NCOA3,RUVBL2,HTATIP,CASP8,MYOD1,CCND1,ETS1,NRIP1,GH1,STAT5B,PDGFRB,STRN3,PPARGC1A,CFLAR
GO:BP	response to molecule of bacterial origin	GO:0002237	1.86E-08	7.730589953	364	618	42	17847	ANKRD1,NR1H2,SIRT2,TRIB1,IRF5,FOS,SRC,TRAF6,JUN,MAPK1,ABL1,AKT1,PRKCA,RELA,HDAC2,NFKB1,RARA,MAPK3,NFKBIA,CEBPB,LYN,VIM,MAPK14,JAK2,VDR,CHUK,MAPK8,CASP8,NFKB2,HDAC5,CDK4,TNFRSF1B,BCR,PRKCE,NFKBIB,NOTCH1,HMGB1,FASLG,JUND,PPARGC1A,RHOA,NR1H3
GO:BP	apoptotic mitochondrial changes	GO:0008637	1.96E-08	7.707488888	126	618	24	17847	ATP2A1,CDKN2A,TP53,YWHAZ,JUN,YWHAG,AKT1,YWHAQ,YWHAB,YWHAE,GSK3B,SFN,MAPK8,CASP8,E2F1,HSPA1A,YWHAH,BCL2,ARRB2,PARK2,PPP2CB,ATF2,ERBB4,LMNA
GO:BP	DNA conformation change	GO:0071103	1.97E-08	7.705362356	320	618	39	17847	NIPBL,CENPN,RFC4,TOP2A,CDKN2A,TSPY2,TPR,UBA52,UBC,TP53,ABL1,UBB,RPS27A,PARP1,H2AFX,NPM1,RUVBL2,MCM7,CDK1,DAXX,XRCC5,RBBP4,MCM3,DHX9,RBBP7,CHD3,MCM2,SET,DDB1,XRCC6,MCM5,CHAF1A,MCM6,HMGB1,CHD4,CUL4A,CCNB1,HMGA1,GTF2F2
GO:BP	negative regulation of protein kinase activity	GO:0006469	1.99E-08	7.70149432	236	618	33	17847	PTPN6,STK38,PRKCD,TRIB1,MYOCD,MEN1,CDKN2A,YWHAG,ABL1,AKT1,RB1,CBL,PPP2CA,NPM1,PPP2R1A,LYN,NCK1,CDKN1A,PLK1,SIRT1,SFN,APC,CAV1,CEBPA,PAK2,ILK,TSG101,IGF1R,PDPK1,KAT2B,HSPB1,PSEN1,PTPRC
GO:BP	DNA duplex unwinding	GO:0032508	2.00E-08	7.698462687	105	618	22	17847	RFC4,TOP2A,UBA52,UBC,UBB,RPS27A,PARP1,RUVBL2,MCM7,XRCC5,MCM3,DHX9,CHD3,MCM2,DDB1,XRCC6,MCM5,MCM6,CHD4,CUL4A,HMGA1,GTF2F2
GO:BP	nitrogen compound transport	GO:0071705	2.10E-08	7.678749126	2466	618	147	17847	TRAM1,CLTA,SAMM50,LRRC8A,UBE2D3,ANKRD1,COMP,ATP6V1B2,RAB8A,PPFIA1,PRKCD,TSLP,BAG3,SLC38A10,CD320,TXN,MYOM1,CKAP5,HFE,SLC3A2,TGFB3,SLC25A22,FOLR1,SLC36A2,CHRNA4,RAB1B,RPS26,FGG,SYNGR1,PANX3,RAF1,RAE1,TPR,KIF1A,UBA52,UBC,TP53,YWHAZ,SRC,TRAF6,EGFR,SMAD3,SMAD2,YWHAG,MAPK1,PIK3R1,FYN,MDM2,ABL1,AKT1,UBE2D2,PRKCA,ACTB,STAT3,PRKACA,UBB,MAPK3,PTPN11,YWHAQ,YWHAB,RPS27A,HDAC3,PML,HSPA8,YWHAE,NPM1,NFKBIA,GSK…
GO:BP	regulation of DNA-templated transcription, initiation	GO:2000142	2.15E-08	7.668207931	37	618	14	17847	PSMC2,TP53,ESR1,JUN,CTNNB1,PSMC5,CREB1,THRA,SRF,GTF2B,HMGB1,PSMC6,TAF1,PSMC4
GO:BP	cellular response to extracellular stimulus	GO:0031668	2.17E-08	7.663231795	264	618	35	17847	MYOCD,HFE,FOLR1,ASNS,FOS,TP53,JUN,MAPK1,FYN,MDM2,MAPK3,CBL,HSPA8,NCOA1,PPARG,LYN,CDKN1A,SIRT1,VDR,MAPK8,HSPA5,MYOD1,BCL2,HNRPA1,SRF,MAP3K5,GABARAPL2,MAX,ATF4,STK24,ATF3,PTPRC,TAF1,FAS,GABARAP
GO:BP	protein transport	GO:0015031	2.27E-08	7.643249512	2084	618	130	17847	TRAM1,CLTA,SAMM50,UBE2D3,ANKRD1,COMP,ATP6V1B2,RAB8A,PRKCD,TSLP,BAG3,TXN,MYOM1,HFE,TGFB3,RAB1B,RPS26,FGG,SYNGR1,PANX3,RAF1,RAE1,TPR,KIF1A,UBA52,UBC,TP53,YWHAZ,SRC,TRAF6,EGFR,SMAD3,SMAD2,YWHAG,MAPK1,PIK3R1,FYN,MDM2,ABL1,AKT1,UBE2D2,PRKCA,STAT3,PRKACA,UBB,MAPK3,PTPN11,YWHAQ,YWHAB,RPS27A,HDAC3,PML,HSPA8,YWHAE,NPM1,NFKBIA,GSK3B,PPARG,LYN,MAPK14,JAK2,FLNA,SYK,HSPA4,ERBB2,CDKN1A,HIF1A,PRKCZ,CSNK2A2,IRS1…
GO:BP	regulation of hematopoietic progenitor cell differentiation	GO:1901532	2.33E-08	7.632651682	86	618	20	17847	PSMC2,RUNX1,PSMA5,ABL1,PSMC5,PSMA1,PSMD4,MYB,PSMD2,NOTCH1,PSMA3,SOS1,TCF3,ITCH,PSMC1,TAL1,PSMD13,PSMC6,PSMA6,PSMC4
GO:BP	response to heat	GO:0009408	2.58E-08	7.587841077	174	618	28	17847	BAG3,RAE1,TPR,EP300,CREBBP,MAPK1,AKT1,HDAC2,PRKACA,MAPK3,HSPA8,YWHAE,GSK3B,SUMO1,LYN,DAXX,CDKN1A,SIRT1,STUB1,ATM,RBBP7,HSP90AA1,HSPA5,HSPA1A,ATR,VCP,MAPT,RPA2
GO:BP	reproductive process	GO:0022414	2.66E-08	7.575526791	1462	618	101	17847	TMEM119,CSDA,ODF4,NPHP1,NIPBL,SIRT2,MYOCD,ADIPOR2,MEN1,HFE,TOP2A,TGFB3,RXRA,RPS6KA2,EPAS1,FOS,PRSS21,WNT7A,TSPY2,VEGFA,ESR1,GRB2,SRC,AR,EGFR,CTNNB1,MAPK1,AKT1,HDAC2,SMAD4,STAT3,PRKACA,UBB,RARA,PCNA,MAPK3,PTPN11,PRKDC,CBL,TGFBR1,PPP2CA,H2AFX,NCOR2,TBP,NCOA1,PPP2R1A,PPARG,CEBPB,HDAC4,MAPK14,FLNA,CDK1,HIF1A,PLK1,SIRT1,VDR,CSNK2A2,APP,TERF1,ATM,CASP8,THRB,TRIM28,ZBTB16,SMURF2,THRA,E2F1,HSPA5,BCL2,ARR…
GO:BP	regulation of cytoskeleton organization	GO:0051493	2.69E-08	7.569702619	545	618	53	17847	PSRC1,CEP250,PPFIA1,PRKCD,ESPN,PLXNB1,TGFB3,RAE1,SYNPO2L,CDK2AP2,TPR,GRB2,SMAD3,BRCA1,CTNNB1,MAPK1,PIK3R1,ABL1,SMAD4,MAPK3,TGFBR1,NPM1,CRK,GSK3B,NCK1,FLNA,PLK1,TERF1,CDC42,PAK1,APC,ARF6,HSPA1A,XPO1,PARK2,PTK2B,CHEK1,PRKCE,MAPT,SMC1L1,HDAC6,CLTC,DCTN1,SPTAN1,ILK,PDGFRB,KAT2B,AKAP9,MAPRE1,HRAS,CDK5,RHOA,MET
GO:BP	positive regulation of mitochondrion organization	GO:0010822	2.71E-08	7.56722194	117	618	23	17847	UBE2D3,TP53,YWHAZ,YWHAG,YWHAQ,YWHAB,YWHAE,GSK3B,HIF1A,CSNK2A2,SFN,SMURF1,MAPK8,CASP8,E2F1,YWHAH,BCL2,CDC37,PARK2,HDAC6,PPARGC1A,KDR,HTT
GO:BP	positive regulation of hemopoiesis	GO:1903708	2.83E-08	7.548614211	187	618	29	17847	TRIB1,FOS,RUNX1,TRAF6,JUN,RB1,PRKCA,STAT3,RARA,STAT1,MAPK14,SYK,HIF1A,PRKCZ,CASP8,ZBTB16,CREB1,HSPA1A,ETS1,STAT5B,MYB,BTK,HMGB1,ZAP70,TAL1,RHOA,TGFBR2,PTPRC,FADD
GO:BP	reproduction	GO:0000003	3.00E-08	7.523390885	1465	618	101	17847	TMEM119,CSDA,ODF4,NPHP1,NIPBL,SIRT2,MYOCD,ADIPOR2,MEN1,HFE,TOP2A,TGFB3,RXRA,RPS6KA2,EPAS1,FOS,PRSS21,WNT7A,TSPY2,VEGFA,ESR1,GRB2,SRC,AR,EGFR,CTNNB1,MAPK1,AKT1,HDAC2,SMAD4,STAT3,PRKACA,UBB,RARA,PCNA,MAPK3,PTPN11,PRKDC,CBL,TGFBR1,PPP2CA,H2AFX,NCOR2,TBP,NCOA1,PPP2R1A,PPARG,CEBPB,HDAC4,MAPK14,FLNA,CDK1,HIF1A,PLK1,SIRT1,VDR,CSNK2A2,APP,TERF1,ATM,CASP8,THRB,TRIM28,ZBTB16,SMURF2,THRA,E2F1,HSPA5,BCL2,ARR…
GO:BP	mitochondrion organization	GO:0007005	3.06E-08	7.514837044	530	618	52	17847	SAMM50,UBE2D3,FOXRED1,BAG3,COX17,INF2,EPAS1,ATP2A1,CDKN2A,TP53,YWHAZ,JUN,YWHAG,AKT1,STAT3,YWHAQ,YWHAB,PARP1,YWHAE,GSK3B,HSPA4,HIF1A,CSNK2A2,SFN,SMURF1,MAPK8,CASP8,HSP90AA1,E2F1,HSPA1A,YWHAH,BCL2,CEBPA,CDC37,ARRB2,SQSTM1,PARK2,PPP2CB,MAPT,ATF2,HDAC6,PHB2,GABARAPL2,DNM2,PHB,PPARGC1A,CDK5,ERBB4,KDR,LMNA,HTT,GABARAP
GO:BP	positive regulation of ubiquitin-dependent protein catabolic process	GO:2000060	3.08E-08	7.51168079	97	618	21	17847	SIRT2,TRIB1,MDM2,AKT1,GSK3B,SUMO1,SUMO2,PLK1,STUB1,SMURF1,CAV1,HSPA1A,CEBPA,PARK2,PTK2B,VCP,DISC1,PSEN1,AXIN1,TAF1,DAB2
GO:BP	toll-like receptor signaling pathway	GO:0002224	3.43E-08	7.46447467	152	618	26	17847	UBE2D3,FGG,UBA52,UBC,ESR1,TRAF6,IKBKG,IKBKE,UBE2D2,UBB,RPS27A,NFKBIA,LYN,IKBKB,CHUK,CASP8,CAV1,ARRB2,TBK1,PRKCE,BTK,PDPK1,HMGB1,MAP3K7,FADD,NR1H3
GO:BP	mRNA catabolic process	GO:0006402	3.46E-08	7.460797654	371	618	42	17847	CSDA,EXOSC1,PRKCD,PSMC2,RPS26,PSMA5,UBA52,UBC,YWHAZ,AKT1,PRKCA,UBB,YWHAB,RPS27A,HSPA8,PPP2CA,NPM1,PPP2R1A,VIM,MAPK14,DHX9,RNPS1,ATM,PSMC5,E2F1,HSPA1A,XPO1,SET,MLH1,PSMA1,PSMD4,PSMD2,PSMA3,PABPC1,PSMC1,HSPB1,PSMD13,FUS,RPS3A,PSMC6,PSMA6,PSMC4
GO:BP	blood vessel morphogenesis	GO:0048514	3.75E-08	7.425818381	689	618	61	17847	COMP,FMNL3,NR4A1,MYOCD,ADIPOR2,CLDN5,APLNR,FOLR1,EPAS1,VEZF1,RUNX1,WNT7A,MIR210,VEGFA,JUN,BRCA1,CTNNB1,ABL1,AKT1,PRKCA,SP1,STAT3,PLCG1,SHC1,PML,TGFBR1,STAT1,PPARG,SMAD1,MAPK14,SYK,ERBB2,HIF1A,SIRT1,CDC42,HGS,CAV1,HDAC5,JAK1,FN1,PRKCB,ETS1,NCL,PTK2B,ATF2,SRF,MYH9,NOTCH1,PDGFRB,PDPK1,ANXA2,SOS1,FASLG,TAL1,ITGB1,HSPB1,RHOA,TGFBR2,KDR,PIK3CA,ITGB3
GO:BP	regulation of epithelial cell proliferation	GO:0050678	3.97E-08	7.401267367	388	618	43	17847	NR4A1,MEN1,APLNR,SOX11,MAGED1,WNT7A,VEGFA,MYC,AR,EGFR,SMAD3,JUN,CTNNB1,AKT1,RB1,PRKCA,SP1,STAT3,MCC,PRKDC,PLCG1,TGFBR1,STAT1,PPARG,ERBB2,HIF1A,SIRT1,VDR,SFN,CDC42,CAV1,CCND1,STAT5A,ATF2,NOTCH1,PDPK1,PHB2,HMGB1,HRAS,STRAP,KDR,ITGB3,CFLAR
GO:BP	regulation of cysteine-type endopeptidase activity	GO:2000116	3.98E-08	7.399903357	242	618	33	17847	NR4A1,RAF1,CDKN2A,VEGFA,SRC,MYC,SMAD3,CSNK2A1,FYN,MDM2,AKT1,LCK,PML,YWHAE,PPARG,JAK2,SYK,SIRT1,SFN,CASP8,ARRB1,ARRB2,MGMT,PAK2,VCP,MAPT,MAP3K5,HMGB1,FASLG,RHOA,FAS,CFLAR,FADD
GO:BP	ERBB2 signaling pathway	GO:0038128	4.10E-08	7.387066931	32	618	13	17847	GRB2,SRC,EGFR,PIK3R1,PRKCA,SHC1,ERBB2,STUB1,HSP90AA1,CDC37,SOS1,ERBB4,PIK3CA
GO:BP	regulation of response to cytokine stimulus	GO:0060759	4.23E-08	7.373965681	190	618	29	17847	PTPN6,NR1H2,TSLP,MIR99A,RUNX1,IKBKG,IKBKE,PTPN11,STAT1,PPARG,SUMO1,TNFRSF1A,IKBKB,JAK2,SYK,HIF1A,CHUK,DHX9,CASP8,CAV1,HSPA1A,JAK1,CDC37,PARK2,TBK1,TAF9,PTPRC,FADD,NR1H3
GO:BP	cell morphogenesis involved in neuron differentiation	GO:0048667	4.24E-08	7.372285196	603	618	56	17847	EFNB1,RAB8A,BOC,PLXNB1,TUBB2B,WNT7A,VEGFA,GRB2,SRC,MAPK1,PIK3R1,FYN,ABL1,RB1,PRKCA,ACTB,SMAD4,MAPK3,PTPN11,PLCG1,SHC1,SIN3A,GSK3B,ERBB2,APP,CDC42,PAK1,CREB1,HSP90AA1,YWHAH,BCL2,FN1,NEDD4,DISC1,TNIK,MAPT,HDAC6,SRF,SPTAN1,ILK,SKIL,NOTCH1,MAP2K1,SOS1,DNM2,DLG4,GAB2,IRS2,SIAH1,ITGB1,PSEN1,CDK5,RHOA,PIK3CA,BMPR1B,GRB10
GO:BP	Wnt signaling pathway, planar cell polarity pathway	GO:0060071	4.40E-08	7.357023968	109	618	22	17847	PSMC2,WNT7A,PSMA5,ABL1,SMURF1,CDC42,SMURF2,PSMC5,ARRB2,PSMA1,PSMD4,CLTC,PSMD2,PSMA3,DVL2,PSMC1,PSMD13,RHOA,PSMC6,PSMA6,DAB2,PSMC4
GO:BP	positive regulation of cellular protein catabolic process	GO:1903364	4.41E-08	7.355083065	142	618	25	17847	SIRT2,TRIB1,PSMC2,MDM2,AKT1,GSK3B,SUMO1,SUMO2,PLK1,STUB1,SMURF1,CAV1,HSP90AA1,HSPA1A,CEBPA,PARK2,PTK2B,VCP,DISC1,PSMC1,PSEN1,AXIN1,TAF1,DAB2,PSMC4
GO:BP	multicellular organismal homeostasis	GO:0048871	4.65E-08	7.332289782	486	618	49	17847	TMEM119,COL2A1,NR1H2,MFAP2,ADIPOR2,HFE,ACACA,SCD,EPAS1,SLN,VEGFA,SRC,TRAF6,EGFR,CTNNB1,RB1,PRKCA,ACTB,STAT3,PRKACA,UBB,PTPN11,HDAC3,CEBPB,JAK2,SYK,PRKAB1,SFN,APC,ACTG1,CAV1,THRA,BCL2,PTK2B,SRF,IGF1R,NOTCH1,CSK,ATF4,BARD1,HSPB1,PPARGC1A,STRAP,GADD45G,PIK3CA,ITGB3,MET,GRB10,NR1H3
GO:BP	response to lipopolysaccharide	GO:0032496	5.11E-08	7.291409235	345	618	40	17847	ANKRD1,NR1H2,TRIB1,FOS,SRC,TRAF6,JUN,MAPK1,ABL1,AKT1,PRKCA,RELA,HDAC2,NFKB1,RARA,MAPK3,NFKBIA,CEBPB,LYN,VIM,MAPK14,JAK2,VDR,CHUK,MAPK8,CASP8,NFKB2,HDAC5,CDK4,TNFRSF1B,BCR,PRKCE,NFKBIB,NOTCH1,HMGB1,FASLG,JUND,PPARGC1A,RHOA,NR1H3
GO:BP	cellular response to UV	GO:0034644	5.18E-08	7.285779121	80	618	19	17847	TP53,EP300,CREBBP,MYC,PIK3R1,MDM2,PCNA,PARP1,NPM1,RUVBL2,CDKN1A,SIRT1,NEDD4,DDB1,ATR,YY1,CHEK1,ATF4,TAF1
GO:BP	mammary gland development	GO:0030879	5.18E-08	7.285745748	143	618	25	17847	TGFB3,CSN3,VEGFA,ESR1,SRC,AR,MAPK1,AKT1,PML,NCOR2,NCOA1,CEBPB,JAK2,HIF1A,VDR,CREB1,CAV1,CCND1,STAT5A,MGMT,BTRC,PHB2,IRS2,TGFBR2,ERBB4
GO:BP	regulation of G1/S transition of mitotic cell cycle	GO:2000045	5.19E-08	7.284508368	179	618	28	17847	PTPN6,CDKN2A,CDK2AP2,CTDSP2,TP53,EP300,EGFR,MDM2,AKT1,RB1,PCNA,PRKDC,PML,CDK1,CDKN1A,SFN,ATM,E2F1,CDK4,BCL2,CCND1,RBL1,RPA2,CUL4A,CARM1,MDM4,BRD7,CCNB1
GO:BP	protein stabilization	GO:0050821	5.19E-08	7.284508368	179	618	28	17847	PRKCD,BAG3,CSN3,CDKN2A,TP53,EP300,SMAD3,PIK3R1,VHL,SUMO1,FLNA,PIN1,CDKN1A,CREB1,HSP90AA1,HSPA1A,CDC37,PARK2,USP7,PHB2,TAF9,TCP1,PHB,PPARGC1A,CCT5,MDM4,TAF1,CDK7
GO:BP	import into nucleus	GO:0051170	5.41E-08	7.266686158	167	618	27	17847	SNRPF,PRKCD,BAG3,TPR,TP53,SMAD3,MAPK1,PIK3R1,AKT1,STAT3,HDAC3,PML,NFKBIA,MAPK14,FLNA,SYK,CDKN1A,TRIM28,CDH1,KPNA2,HNRPA1,DDX20,PHB2,SNRPB,PSEN1,LMNA,SNRPD2
GO:BP	positive regulation of intracellular protein transport	GO:0090316	5.42E-08	7.265897306	155	618	26	17847	UBE2D3,PRKCD,BAG3,TPR,TP53,SMAD3,MAPK1,PIK3R1,FYN,MDM2,PRKACA,HDAC3,YWHAE,GSK3B,MAPK14,FLNA,ERBB2,CSNK2A2,SFN,TRIM28,CDC42,PAK1,CDH1,HRAS,PSEN1,CDK5
GO:BP	cellular response to inorganic substance	GO:0071241	6.24E-08	7.204479588	219	618	31	17847	MT1G,RYR1,HFE,MT2A,FOS,EGFR,JUN,MAPK1,AKT1,MAPK3,PARP1,CRK,SUMO1,DAXX,APP,CHUK,MAPK8,CREB1,HSPA5,CDH1,CEBPA,PARK2,DNM2,DLG4,ATF4,JUND,PPARGC1A,FUS,IQGAP1,CCNB1,CFLAR
GO:BP	cell division	GO:0051301	6.25E-08	7.203900055	609	618	56	17847	CLTA,PSRC1,CDC123,SIRT2,CKAP5,TOP2A,TGFB3,NEK6,TACC1,WNT7A,CDKN2A,RAE1,CDK2AP2,TPR,KLHL21,NSMCE2,VEGFA,MYC,NR3C1,RB1,UBE2I,NCOA3,TUBB,CDK1,PIN1,EPB41,PLK1,SFN,TERF1,CDC42,APC,ZBTB16,ARF6,CDK4,PPP1CA,CDC37,CCND1,RBL1,PRKCE,SMC1L1,CLTC,DCTN1,MCM5,MYH9,TSG101,NOTCH1,TAL1,MAPRE1,KIT,UNC119,GIT1,CDK5,BCAR1,RHOA,CDK7,CCNB1
GO:BP	regulation of establishment of planar polarity	GO:0090175	6.42E-08	7.192371362	111	618	22	17847	PSMC2,WNT7A,PSMA5,ABL1,SMURF1,CDC42,SMURF2,PSMC5,ARRB2,PSMA1,PSMD4,CLTC,PSMD2,PSMA3,DVL2,PSMC1,PSMD13,RHOA,PSMC6,PSMA6,DAB2,PSMC4
GO:BP	protein insertion into mitochondrial membrane	GO:0051204	6.69E-08	7.174865002	47	618	15	17847	SAMM50,TP53,YWHAZ,YWHAG,YWHAQ,YWHAB,YWHAE,HSPA4,SFN,MAPK8,CASP8,HSP90AA1,E2F1,YWHAH,BCL2
GO:BP	secretion by cell	GO:0032940	6.76E-08	7.169979491	1549	618	104	17847	ACTR1B,PTPN6,ANKRD1,ATP6AP2,COMP,RAB8A,PPFIA1,PRKCD,TSLP,S100P,PSMC2,MYOM1,HFE,TGFB3,CHRNA4,CAP1,FGG,SYNGR1,PIP5K1C,PANX3,DERA,SOX11,RAF1,WNT7A,FBXL20,COMMD3,PSMA5,DOK3,VEGFA,SRC,TRAF6,EGFR,SMAD2,MAPK1,ABL1,PRKCA,SMAD4,NFKB1,MAPK3,PTPN11,CBL,PML,HSPA8,GSK3B,EEF1A1,TNFRSF1A,LYN,TUBB,MAPK14,JAK2,FLNA,SYK,HIF1A,PRKCZ,XRCC5,APP,IRS1,CHUK,DHX9,PAK1,HGS,ARF6,CREB1,HSP90AA1,COPS5,HSPA1A,ARRB1,FN1,PRKCB,…
GO:BP	positive regulation of protein insertion into mitochondrial membrane involved in apoptotic signaling pathway	GO:1900740	6.88E-08	7.162469622	27	618	12	17847	TP53,YWHAZ,YWHAG,YWHAQ,YWHAB,YWHAE,SFN,MAPK8,CASP8,E2F1,YWHAH,BCL2
GO:BP	positive regulation of DNA-templated transcription, initiation	GO:2000144	6.88E-08	7.162469622	27	618	12	17847	PSMC2,TP53,ESR1,JUN,CTNNB1,PSMC5,CREB1,SRF,GTF2B,PSMC6,TAF1,PSMC4
GO:BP	regulation of protein insertion into mitochondrial membrane involved in apoptotic signaling pathway	GO:1900739	6.88E-08	7.162469622	27	618	12	17847	TP53,YWHAZ,YWHAG,YWHAQ,YWHAB,YWHAE,SFN,MAPK8,CASP8,E2F1,YWHAH,BCL2
GO:BP	positive regulation of growth	GO:0045927	7.00E-08	7.155190175	275	618	35	17847	CSDA,NIPBL,VEGFA,EGFR,CSNK2A1,MAPK1,AKT1,PRKDC,TGFBR1,MAPK14,CDK1,ERBB2,PIN1,SFN,SMURF1,CDC42,PAK1,CREB1,MYOD1,BCL2,FN1,INSR,PARK2,PTK2B,DISC1,MAPT,GH1,SRF,ILK,NOTCH1,TAF9,RHOA,TGFBR2,ERBB4,CCNB1
GO:BP	regulation of generation of precursor metabolites and energy	GO:0043467	7.31E-08	7.136329138	157	618	26	17847	PFKFB4,COX17,MIR210,RAE1,TPR,TP53,AKT1,STAT3,NCOR1,GSK3B,HDAC4,CDK1,HIF1A,APP,IRS1,PPP1CA,INSR,VCP,PHB2,IRS2,PPARA,PSEN1,PPARGC1A,RHOA,PIK3CA,CCNB1
GO:BP	peptide transport	GO:0015833	8.44E-08	7.073594239	2124	618	130	17847	TRAM1,CLTA,SAMM50,UBE2D3,ANKRD1,COMP,ATP6V1B2,RAB8A,PRKCD,TSLP,BAG3,TXN,MYOM1,HFE,TGFB3,RAB1B,RPS26,FGG,SYNGR1,PANX3,RAF1,RAE1,TPR,KIF1A,UBA52,UBC,TP53,YWHAZ,SRC,TRAF6,EGFR,SMAD3,SMAD2,YWHAG,MAPK1,PIK3R1,FYN,MDM2,ABL1,AKT1,UBE2D2,PRKCA,STAT3,PRKACA,UBB,MAPK3,PTPN11,YWHAQ,YWHAB,RPS27A,HDAC3,PML,HSPA8,YWHAE,NPM1,NFKBIA,GSK3B,PPARG,LYN,MAPK14,JAK2,FLNA,SYK,HSPA4,ERBB2,CDKN1A,HIF1A,PRKCZ,CSNK2A2,IRS1…
GO:BP	signal transduction involved in DNA integrity checkpoint	GO:0072401	8.89E-08	7.051168342	73	618	18	17847	TP53,EP300,BRCA1,MDM2,PCNA,PRKDC,PML,CDK1,CDKN1A,PLK1,SFN,ATM,E2F1,CHEK1,CDC5L,CARM1,MDM4,CCNB1
GO:BP	regulation of hematopoietic stem cell differentiation	GO:1902036	8.89E-08	7.051168342	73	618	18	17847	PSMC2,RUNX1,PSMA5,ABL1,PSMC5,PSMA1,PSMD4,MYB,PSMD2,PSMA3,TCF3,ITCH,PSMC1,TAL1,PSMD13,PSMC6,PSMA6,PSMC4
GO:BP	signal transduction involved in DNA damage checkpoint	GO:0072422	8.89E-08	7.051168342	73	618	18	17847	TP53,EP300,BRCA1,MDM2,PCNA,PRKDC,PML,CDK1,CDKN1A,PLK1,SFN,ATM,E2F1,CHEK1,CDC5L,CARM1,MDM4,CCNB1
GO:BP	positive regulation of transcription from RNA polymerase II promoter involved in cellular response to chemical stimulus	GO:1901522	9.33E-08	7.029941632	22	618	11	17847	RUNX2,VEGFA,TP53,EP300,RELA,SMAD4,SMAD1,HIF1A,NOTCH1,SMAD9,ATF4
GO:BP	regulation of proteasomal ubiquitin-dependent protein catabolic process	GO:0032434	9.44E-08	7.024817098	124	618	23	17847	SIRT2,TRIB1,HFE,MDM2,AKT1,GSK3B,SUMO1,SUMO2,PLK1,STUB1,CAV1,HSPA1A,CEBPA,PARK2,VCP,SMARCC1,USP7,UBQLN4,TAF9,PSEN1,UCHL5,TAF1,DAB2
GO:BP	regulation of leukocyte differentiation	GO:1902105	9.52E-08	7.021558857	278	618	35	17847	PTPN6,TRIB1,FOS,RUNX1,CDKN2A,TRAF6,MYC,JUN,CTNNB1,PIK3R1,ABL1,RB1,PRKCA,RARA,CEBPB,LYN,SYK,ERBB2,PRKCZ,CASP8,ZBTB16,CREB1,FANCA,MYB,BTK,HMGB1,ZAP70,SOS1,TAL1,CUL4A,RHOA,TGFBR2,PTPRC,FADD,JAK3
GO:BP	response to hydrogen peroxide	GO:0042542	9.67E-08	7.01468351	147	618	25	17847	PRKCD,TXN,MB,SRC,JUN,FYN,MDM2,ABL1,RELA,HDAC2,PCNA,STAT1,CRK,CDK1,SIRT1,BCL2,ETS1,PTK2B,PPP2CB,HDAC6,MAP3K5,MYB,PDGFRB,STK24,MET
GO:BP	regulation of system process	GO:0044057	9.76E-08	7.010749638	616	618	56	17847	MYH6,RYR1,MYL2,MYOCD,TNNT3,HSPB7,TNNI2,EPAS1,MYBPH,FGG,MYH7,ATP2A1,SGK1,WNT7A,SLN,CACNG6,TNNC2,SRC,EGFR,SMAD3,MDM2,AKT1,PRKCA,SMAD4,PRKACA,PTPN11,PARP1,YWHAE,SUMO1,TNFRSF1A,HDAC4,JAK2,FLNA,PIN1,EPB41,PRKCZ,APP,CDK9,THRB,PAK1,CAV1,THRA,TNFRSF1B,YY1,PTK2B,SRF,NOTCH1,DLG4,AKAP9,KIT,PPARA,PPARGC1A,RHOA,LMNA,NR1H3,ADRBK1
GO:BP	cell junction organization	GO:0034330	1.01E-07	6.995985824	293	618	36	17847	NPHP1,TGFB3,CLDN5,XIRP2,PIP5K1C,RUNX1,VEGFA,SRC,SMAD3,CTNNB1,ABL1,PRKCA,ACTB,PRKACA,TGFBR1,IKBKB,FLNA,CDC42,APC,ACTG1,ARF6,CAV1,CDH1,BCL2,FN1,BCR,PTK2B,SRF,ILK,STRN,ACTN1,PDPK1,CSK,RHOA,IQGAP1,KDR
GO:BP	anaphase-promoting complex-dependent catabolic process	GO:0031145	1.04E-07	6.984478614	83	618	19	17847	PSMC2,PSMA5,UBA52,UBC,UBB,RPS27A,CDK1,PLK1,PSMC5,PSMA1,PSMD4,PSMD2,PSMA3,PSMC1,PSMD13,PSMC6,PSMA6,PSMC4,CCNB1
GO:BP	embryo development	GO:0009790	1.06E-07	6.972821176	1028	618	78	17847	COL2A1,ATP6AP2,CSDA,MYH6,EFNB1,MFAP2,NIPBL,TCAP,TUBB2B,TOP2A,TGFB3,RXRA,APLNR,FOLR1,EPAS1,RUNX2,SOX11,WNT7A,DAD1,VEGFA,TP53,GRB2,EP300,CREBBP,TRAF6,HDAC1,AR,EGFR,SMAD3,SMAD2,BRCA1,CTNNB1,MAPK1,ABL1,AKT1,HDAC2,SMAD4,PRKACA,RARA,MAPK3,PRKDC,PLCG1,SIN3A,TGFBR1,NCOA1,CEBPB,SMAD1,CDK1,HIF1A,ATM,CASP8,TRIM28,ZBTB16,CEBPA,FN1,BCR,INSR,CHEK1,SRF,MYH9,SKIL,NOTCH1,MAP2K1,SOS1,DVL2,TAL1,SMARCB1,KIT,ITGB1,CU…
GO:BP	microtubule-based process	GO:0007017	1.10E-07	6.958488684	762	618	64	17847	ACTR1B,PSRC1,DNAH2,CEP250,BAG3,TUBB2B,CKAP5,NEK6,TACC1,RAE1,CDK2AP2,TPR,KIF1A,BRCA1,CTNNB1,ABL1,UBB,NCOR1,HDAC3,HSPA8,NPM1,PPP2R1A,GSK3B,TUBB,FLNA,CDK1,ERBB2,HIF1A,PRKCZ,PLK1,APP,TERF1,CDC42,PAK1,APC,TERF2,HSPA1A,XPO1,CHD3,MLH1,DNCL1,CHEK1,VCP,DISC1,MAPT,SMC1L1,HDAC6,CLTC,DCTN1,MYH9,SFPQ,KAT2B,AKAP9,MAPRE1,ITGB1,HSPB1,TUBA4A,CDK5,RHOA,LMNA,CCNB1,MET,HTT,GABARAP
GO:BP	macroautophagy	GO:0016236	1.11E-07	6.953377192	294	618	36	17847	RUFY4,ATP6V1B2,BAG3,RAB1B,TP53,SRC,IKBKG,CSNK2A1,AKT1,PRKACA,MAPK3,HIF1A,SIRT1,PRKAB1,CSNK2A2,SMURF1,MAPK8,HGS,CDC37,NEDD4,SQSTM1,DNCL1,PARK2,TBK1,VCP,HDAC6,UBQLN4,TSG101,GABARAPL2,MAP3K7,PSEN1,CDK5,KDR,PIK3CA,HTT,GABARAP
GO:BP	protein localization to membrane	GO:0072657	1.13E-07	6.946395817	636	618	57	17847	TRAM1,SAMM50,RAB8A,PPFIA1,EFR3A,RPS26,TM9SF1,UBA52,TP53,YWHAZ,AR,EGFR,YWHAG,PIK3R1,FYN,AKT1,ACTB,YWHAQ,YWHAB,RPS27A,YWHAE,TNFRSF1A,IKBKB,FLNA,HSPA4,ERBB2,PRKCZ,SFN,SMURF1,MAPK8,CASP8,PAK1,HGS,ARF6,CAV1,HSP90AA1,E2F1,HSPA5,CHM,YWHAH,CDH1,BCL2,SQSTM1,PARK2,KRT18,PRKCE,TNIK,CLTC,PDPK1,CSK,ANXA2,DLG4,HRAS,ITGB1,CDK5,RPS3A,DAB2
GO:BP	regulation of transcription initiation from RNA polymerase II promoter	GO:0060260	1.17E-07	6.933240233	28	618	12	17847	PSMC2,TP53,ESR1,PSMC5,CREB1,THRA,SRF,GTF2B,HMGB1,PSMC6,TAF1,PSMC4
GO:BP	amide transport	GO:0042886	1.22E-07	6.914969494	2158	618	131	17847	TRAM1,CLTA,SAMM50,UBE2D3,ANKRD1,COMP,ATP6V1B2,RAB8A,PRKCD,TSLP,BAG3,TXN,MYOM1,HFE,TGFB3,FOLR1,RAB1B,RPS26,FGG,SYNGR1,PANX3,RAF1,RAE1,TPR,KIF1A,UBA52,UBC,TP53,YWHAZ,SRC,TRAF6,EGFR,SMAD3,SMAD2,YWHAG,MAPK1,PIK3R1,FYN,MDM2,ABL1,AKT1,UBE2D2,PRKCA,STAT3,PRKACA,UBB,MAPK3,PTPN11,YWHAQ,YWHAB,RPS27A,HDAC3,PML,HSPA8,YWHAE,NPM1,NFKBIA,GSK3B,PPARG,LYN,MAPK14,JAK2,FLNA,SYK,HSPA4,ERBB2,CDKN1A,HIF1A,PRKCZ,CSNK2A…
GO:BP	positive regulation of cell cycle process	GO:0090068	1.23E-07	6.910974144	295	618	36	17847	PHIP,NIPBL,SIRT2,TPR,NSMCE2,TP53,EP300,EGFR,BRCA1,MDM2,AKT1,RB1,PRKACA,PCNA,SIN3A,PML,NPM1,CDK1,CDKN1A,APP,SFN,ATM,CDC42,E2F1,CDK4,CCND1,INSR,PRKCE,PDGFRB,PHB2,SFPQ,CUL4A,CARM1,RHOA,MDM4,CCNB1
GO:BP	positive regulation of histone modification	GO:0031058	1.33E-07	6.876823172	94	618	20	17847	NIPBL,VEGFA,TP53,BRCA1,CTNNB1,SMAD4,MAPK3,RUVBL2,SIRT1,RIF1,CDK9,ATM,ARRB1,MYB,SMARCB1,PPARGC1A,DNMT1,BRD7,LMNA,CCNB1
GO:BP	chemical homeostasis	GO:0048878	1.34E-07	6.87148087	1213	618	87	17847	TPCN1,JSRP1,MT1G,HFE2,PTPN6,NR1H2,ATP6V1B2,RYR1,ADIPOR2,MEN1,HFE,ACACA,MT2A,APLNR,C9ORF47,EPAS1,ATP2A1,RAF1,CLN5,MIR210,TM6SF2,RALY,ALAS2,VEGFA,ESR1,SRC,MYC,EGFR,SMAD3,MAPK1,PIK3R1,FYN,ABL1,AKT1,SMAD4,STAT3,PRKACA,MAPK3,PTPN11,PLCG1,LCK,SIN3A,PARP1,PML,SMARCA4,YWHAE,STAT1,PPARG,LYN,JAK2,HIF1A,SIRT1,VDR,APP,IRS1,SFN,CAV1,BCL2,ARRB1,CEBPA,DDB1,PRKCB,INSR,PARK2,PTK2B,PRKCE,DISC1,SRF,IGF1R,PDPK1,ANXA…
GO:BP	cellular response to molecule of bacterial origin	GO:0071219	1.42E-07	6.848305879	226	618	31	17847	ANKRD1,NR1H2,SIRT2,TRIB1,SRC,TRAF6,MAPK1,ABL1,AKT1,PRKCA,RELA,NFKB1,RARA,MAPK3,NFKBIA,CEBPB,LYN,VIM,MAPK14,VDR,MAPK8,HDAC5,CDK4,TNFRSF1B,BCR,PRKCE,NFKBIB,HMGB1,PPARGC1A,RHOA,NR1H3
GO:BP	intrinsic apoptotic signaling pathway in response to DNA damage	GO:0008630	1.52E-07	6.818467168	105	618	21	17847	TP53,EP300,BRCA1,IKBKE,PIK3R1,ABL1,PRKDC,PML,TNFRSF1A,CDKN1A,SIRT1,SFN,ATM,E2F1,BCL2,MLH1,TNFRSF1B,SKIL,BCL3,PHLDA3,TAF9
GO:BP	positive regulation of NF-kappaB transcription factor activity	GO:0051092	1.52E-07	6.817727876	150	618	25	17847	UBA52,UBC,TRAF6,AR,IKBKG,RELA,NFKB1,STAT3,UBB,RPS27A,NPM1,IKBKB,PRKCZ,APP,CHUK,DHX9,NFKB2,CAV1,HSPA1A,PRKCB,BTK,MAP3K7,CARM1,PSMA6,CFLAR
GO:BP	regulation of histone modification	GO:0031056	1.52E-07	6.817727876	150	618	25	17847	NIPBL,MYOCD,VEGFA,TP53,BRCA1,CTNNB1,SMAD4,MAPK3,SIN3A,RUVBL2,SIRT1,RIF1,CDK9,ATM,MAPK8,ARRB1,SET,CHEK1,MYB,SMARCB1,PPARGC1A,DNMT1,BRD7,LMNA,CCNB1
GO:BP	positive regulation of hydrolase activity	GO:0051345	1.62E-07	6.790989121	769	618	64	17847	NR1H2,PRKCD,PLXNB1,TIAM2,CDKN2A,VEGFA,ESR1,MYC,EGFR,SMAD3,JUN,FYN,AKT1,STAT3,PCNA,MAPK3,PLCG1,LCK,PML,CRK,GSK3B,PPARG,LYN,MAPK14,JAK2,SYK,ERBB2,PIN1,PRKCZ,SIRT1,APP,DHX9,MAPK8,CASP8,VAV1,CAV1,HSPA1A,CHM,ARRB1,FN1,DNCL1,BCR,PTK2B,VCP,MAPT,MAP3K5,PDGFRB,PDPK1,GABARAPL2,HMGB1,SOS1,DVL2,FASLG,HRAS,KIT,ITGB1,GIT1,RHOA,IQGAP1,PTPRC,FAS,CFLAR,FADD,NR1H3
GO:BP	regulation of stress-activated protein kinase signaling cascade	GO:0070302	1.65E-07	6.783807254	241	618	32	17847	MEN1,WNT7A,VEGFA,TRAF6,MYC,EGFR,MAPK1,AKT1,MAPK3,NCOR1,HDAC3,LYN,DAXX,SYK,APP,CDC42,PAK1,COPS5,PARK2,PTK2B,TNIK,MAP3K5,IGF1R,MAP2K1,HMGB1,DVL2,ITCH,MAP3K7,HRAS,GADD45G,AXIN1,FAS
GO:BP	protein polyubiquitination	GO:0000209	1.68E-07	6.775861506	313	618	37	17847	UBE2D3,PSMC2,FBXL20,CDKN2A,PSMA5,UBA52,UBC,TRAF6,BRCA1,CTNNB1,MDM2,UBE2D2,UBB,CBL,RPS27A,STUB1,SMURF1,SMURF2,PSMC5,BCL2,NEDD4,PARK2,PSMA1,PSMD4,BTRC,HDAC6,PSMD2,PSMA3,ITCH,PSMC1,SIAH1,BARD1,PSMD13,PSMC6,TAF1,PSMA6,PSMC4
GO:BP	cellular response to lipopolysaccharide	GO:0071222	1.68E-07	6.775671546	214	618	30	17847	ANKRD1,NR1H2,TRIB1,SRC,TRAF6,MAPK1,ABL1,AKT1,PRKCA,RELA,NFKB1,RARA,MAPK3,NFKBIA,CEBPB,LYN,VIM,MAPK14,VDR,MAPK8,HDAC5,CDK4,TNFRSF1B,BCR,PRKCE,NFKBIB,HMGB1,PPARGC1A,RHOA,NR1H3
GO:BP	export from cell	GO:0140352	1.70E-07	6.770012642	1595	618	105	17847	ACTR1B,PTPN6,ANKRD1,ATP6AP2,COMP,RAB8A,PPFIA1,PRKCD,TSLP,S100P,PSMC2,MYOM1,HFE,TGFB3,CHRNA4,CAP1,FGG,SYNGR1,PIP5K1C,PANX3,DERA,SOX11,RAF1,WNT7A,FBXL20,COMMD3,PSMA5,DOK3,VEGFA,SRC,TRAF6,EGFR,SMAD2,MAPK1,ABL1,PRKCA,SMAD4,NFKB1,MAPK3,PTPN11,CBL,PML,HSPA8,YWHAE,GSK3B,EEF1A1,TNFRSF1A,LYN,TUBB,MAPK14,JAK2,FLNA,SYK,HIF1A,PRKCZ,XRCC5,APP,IRS1,CHUK,DHX9,PAK1,HGS,ARF6,CREB1,HSP90AA1,COPS5,HSPA1A,ARRB1,FN1,…
GO:BP	positive regulation of neurogenesis	GO:0050769	1.79E-07	6.748074224	488	618	48	17847	ANKRD1,NIPBL,NBL1,PLXNB1,TUBB2B,SOX11,VEGFA,EP300,HDAC1,CTNNB1,FYN,RELA,HDAC2,RARA,SIN3A,NCOA1,PPARG,LYN,NCK1,FLNA,HIF1A,XRCC5,SMURF1,PAK1,E2F1,HSPA5,BCL2,FN1,SF3A2,TNFRSF1B,PARK2,PTK2B,DISC1,MAPT,SRF,ILK,SKIL,MYB,NOTCH1,MAP2K1,DLG4,DVL2,TCF3,KIT,PSEN1,RHOA,IQGAP1,CFLAR
GO:BP	regulation of phosphatidylinositol 3-kinase signaling	GO:0014066	1.85E-07	6.732592075	128	618	23	17847	PTPN6,PLXNB1,PIP5K1C,SRC,EGFR,MAPK1,PIK3R1,FYN,MAPK3,CBL,LYN,JAK2,SIRT1,NEDD4,INSR,GH1,IGF1R,PDGFRB,IRS2,KIT,ERBB4,KDR,PIK3CA
GO:BP	chromatin remodeling	GO:0006338	1.88E-07	6.726175165	176	618	27	17847	ACTR6,CENPN,CDKN2A,TPR,ESR1,HDAC1,MYC,RB1,ACTB,HDAC2,SMARCA4,NPM1,RUVBL2,HDAC4,DAXX,RBBP4,RBBP7,PAK1,HDAC5,CHD3,SMARCC1,MYB,KAT2B,CHD4,SMARCB1,SMARCE1,HMGA1
GO:BP	positive regulation of protein binding	GO:0032092	1.99E-07	6.700839914	96	618	20	17847	MEN1,HFE,CLDN5,EP300,ABL1,PPP2CA,GSK3B,PIN1,EPB41,APP,ARF6,CAV1,ARRB1,PARK2,PPP2CB,ANXA2,MAPRE1,PSEN1,CDK5,TAF1
GO:BP	ERK1 and ERK2 cascade	GO:0070371	2.02E-07	6.695380378	315	618	37	17847	PTPN6,PLA2G2A,FGG,SRC,MYC,EGFR,JUN,MAPK1,ABL1,PRKCA,SMAD4,MAPK3,PTPN11,SHC1,LYN,SYK,ERBB2,PIN1,PRKCZ,APP,ARRB1,FN1,ARRB2,PTK2B,NOTCH1,PDGFRB,CSK,PHB2,MAP2K1,HMGB1,HRAS,PHB,ATF3,PTPRC,ERBB4,KDR,CFLAR
GO:BP	RNA catabolic process	GO:0006401	2.04E-07	6.691067016	408	618	43	17847	CSDA,EXOSC1,PRKCD,PSMC2,RPS26,PSMA5,UBA52,UBC,YWHAZ,AKT1,PRKCA,UBB,YWHAB,RPS27A,HSPA8,PPP2CA,NPM1,PPP2R1A,VIM,MAPK14,DHX9,RNPS1,ATM,PSMC5,E2F1,HSPA1A,XPO1,SET,MLH1,TNFRSF1B,PSMA1,PSMD4,PSMD2,PSMA3,PABPC1,PSMC1,HSPB1,PSMD13,FUS,RPS3A,PSMC6,PSMA6,PSMC4
GO:BP	regulation of cytokine-mediated signaling pathway	GO:0001959	2.15E-07	6.668416304	177	618	27	17847	PTPN6,NR1H2,TSLP,MIR99A,RUNX1,IKBKG,IKBKE,PTPN11,STAT1,PPARG,SUMO1,TNFRSF1A,IKBKB,JAK2,SYK,HIF1A,CHUK,CASP8,CAV1,HSPA1A,JAK1,CDC37,PARK2,TBK1,PTPRC,FADD,NR1H3
GO:BP	cellular response to epidermal growth factor stimulus	GO:0071364	2.27E-07	6.643327834	43	618	14	17847	EGFR,AKT1,PTPN11,PLCG1,CBL,MCM7,EEF1A1,ERBB2,NCL,STAT5B,PDPK1,IQGAP1,ERBB4,CFLAR
GO:BP	cellular senescence	GO:0090398	2.32E-07	6.634048225	77	618	18	17847	PRKCD,NEK6,CDKN2A,NSMCE2,TP53,ABL1,PRKDC,PML,H2AFX,MAPK14,CDKN1A,SIRT1,TERF2,RBL1,SRF,MAP2K1,HRAS,HMGA1
GO:BP	pattern recognition receptor signaling pathway	GO:0002221	2.48E-07	6.60573332	204	618	29	17847	UBE2D3,FGG,UBA52,UBC,ESR1,TRAF6,IKBKG,IKBKE,UBE2D2,RELA,UBB,RPS27A,NFKBIA,LYN,IKBKB,CHUK,CASP8,CAV1,HSPA1A,ARRB2,TBK1,PRKCE,BTK,PDPK1,HMGB1,ITCH,MAP3K7,FADD,NR1H3
GO:BP	regulation of fibroblast proliferation	GO:0048145	2.49E-07	6.604013141	87	618	19	17847	TP53,ESR1,MYC,EGFR,JUN,CTNNB1,PRKDC,PML,PPARG,CDKN1A,DHX9,CREB1,E2F1,CDK4,FN1,MYB,PDGFRB,ANXA2,CCNB1
GO:BP	regulation of intracellular protein transport	GO:0033157	2.49E-07	6.603081385	231	618	31	17847	UBE2D3,PRKCD,BAG3,TXN,TPR,TP53,SMAD3,MAPK1,PIK3R1,FYN,MDM2,PRKACA,PTPN11,HDAC3,YWHAE,GSK3B,MAPK14,FLNA,ERBB2,CSNK2A2,SFN,TRIM28,CDC42,PAK1,CDH1,XPO1,PARK2,HRAS,BARD1,PSEN1,CDK5
GO:BP	regulation of muscle system process	GO:0090257	2.52E-07	6.598889906	259	618	33	17847	MYL2,MYOCD,TNNT3,TNNI2,MYBPH,MYH7,ATP2A1,SLN,TNNC2,SMAD3,PRKCA,SMAD4,PRKACA,PARP1,SUMO1,TNFRSF1A,HDAC4,FLNA,PIN1,CDK9,PAK1,CAV1,TNFRSF1B,YY1,SRF,NOTCH1,AKAP9,KIT,PPARA,PPARGC1A,RHOA,LMNA,ADRBK1
GO:BP	epidermal growth factor receptor signaling pathway	GO:0007173	2.69E-07	6.570594348	119	618	22	17847	GRB2,SRC,EGFR,PIK3R1,ABL1,AKT1,PTPN11,PLCG1,CBL,SHC1,APP,CDC42,HGS,PTK2B,TSG101,PDPK1,SOS1,FASLG,PSEN1,BCAR1,IQGAP1,PIK3CA
GO:BP	cellular response to metal ion	GO:0071248	2.84E-07	6.546576911	192	618	28	17847	MT1G,RYR1,HFE,MT2A,FOS,EGFR,JUN,MAPK1,AKT1,MAPK3,PARP1,SUMO1,DAXX,APP,CHUK,MAPK8,CREB1,HSPA5,CDH1,CEBPA,PARK2,DLG4,ATF4,JUND,PPARGC1A,FUS,IQGAP1,CCNB1
GO:BP	fibroblast proliferation	GO:0048144	3.07E-07	6.512430181	88	618	19	17847	TP53,ESR1,MYC,EGFR,JUN,CTNNB1,PRKDC,PML,PPARG,CDKN1A,DHX9,CREB1,E2F1,CDK4,FN1,MYB,PDGFRB,ANXA2,CCNB1
GO:BP	cellular response to nutrient levels	GO:0031669	3.11E-07	6.507041716	233	618	31	17847	HFE,FOLR1,ASNS,TP53,JUN,MAPK1,FYN,MDM2,MAPK3,CBL,HSPA8,NCOA1,PPARG,CDKN1A,SIRT1,VDR,MAPK8,HSPA5,MYOD1,BCL2,HNRPA1,SRF,MAP3K5,GABARAPL2,MAX,ATF4,STK24,ATF3,TAF1,FAS,GABARAP
GO:BP	modulation of chemical synaptic transmission	GO:0050804	3.12E-07	6.506387919	446	618	45	17847	RAB8A,GRM3,TUBB2B,CHRNA4,GRIK4,SYNGR1,WNT7A,FBXL20,SRC,EGFR,YWHAG,MAPK1,FYN,ABL1,STAT3,PRKACA,RARA,PLCG1,GSK3B,JAK2,PRKCZ,APP,PSMC5,CREB1,YWHAH,CDH1,ARRB2,SQSTM1,PRKCB,BCR,PARK2,PTK2B,PRKCE,DISC1,MAPT,SRF,DLG4,AKAP9,HRAS,KIT,ITGB1,GIT1,PSEN1,CDK5,PRKCG
GO:BP	response to acid chemical	GO:0001101	3.31E-07	6.480304804	351	618	39	17847	ACACA,RXRA,SCD,FOLR1,ASNS,VEGFA,SRC,EGFR,FYN,AKT1,RELA,HDAC2,RARA,PCNA,NCOA1,PPARG,CEBPB,LYN,XRCC5,IRS1,CHUK,ATM,CREB1,E2F1,CDK4,MGMT,YY1,PTK2B,PRKCE,ATF2,MYB,PDGFRB,PHB2,RXRB,PPARGC1A,DNMT1,RHOA,KDR,CCNB1
GO:BP	regulation of trans-synaptic signaling	GO:0099177	3.35E-07	6.474392721	447	618	45	17847	RAB8A,GRM3,TUBB2B,CHRNA4,GRIK4,SYNGR1,WNT7A,FBXL20,SRC,EGFR,YWHAG,MAPK1,FYN,ABL1,STAT3,PRKACA,RARA,PLCG1,GSK3B,JAK2,PRKCZ,APP,PSMC5,CREB1,YWHAH,CDH1,ARRB2,SQSTM1,PRKCB,BCR,PARK2,PTK2B,PRKCE,DISC1,MAPT,SRF,DLG4,AKAP9,HRAS,KIT,ITGB1,GIT1,PSEN1,CDK5,PRKCG
GO:BP	glial cell differentiation	GO:0010001	3.36E-07	6.473664762	220	618	30	17847	SIRT2,SOX11,HDAC1,EGFR,CTNNB1,MAPK1,ABL1,AKT1,RELA,HDAC2,STAT3,MAPK3,PTPN11,PPARG,LYN,VIM,CDK1,ERBB2,APP,TNFRSF1B,MAPT,ILK,NDRG1,NOTCH1,CSK,MAP2K1,TAL1,PSEN1,CDK5,RHOA
GO:BP	positive regulation of fibroblast proliferation	GO:0048146	3.39E-07	6.469201697	52	618	15	17847	ESR1,MYC,EGFR,JUN,PRKDC,PML,CDKN1A,DHX9,E2F1,CDK4,FN1,MYB,PDGFRB,ANXA2,CCNB1
GO:BP	positive regulation of mitochondrial outer membrane permeabilization involved in apoptotic signaling pathway	GO:1901030	3.59E-07	6.445436334	37	618	13	17847	TP53,YWHAZ,YWHAG,YWHAQ,YWHAB,YWHAE,GSK3B,SFN,MAPK8,CASP8,E2F1,YWHAH,BCL2
GO:BP	regulation of muscle tissue development	GO:1901861	3.64E-07	6.43911568	156	618	25	17847	CSDA,SIRT2,MYOCD,SMAD3,CTNNB1,MAPK1,SMAD4,TGFBR1,HDAC4,MAPK14,CDK1,PIN1,PAK1,CREB1,MYOD1,BCL2,ARRB2,YY1,NOTCH1,PPARA,PPARGC1A,TGFBR2,ERBB4,DDX17,CCNB1
GO:BP	internal protein amino acid acetylation	GO:0006475	3.96E-07	6.402704131	169	618	26	17847	MYOCD,EP300,CREBBP,BRCA1,SMAD4,MAPK3,SIN3A,NCOA1,NCOA3,RUVBL2,SIRT1,HTATIP,MYOD1,ARRB1,SET,CHEK1,MAPT,ATF2,GTF2B,TAF9,KAT2B,MAP3K7,SMARCB1,PPARGC1A,TAF1,BRD7
GO:BP	negative regulation of organelle organization	GO:0010639	4.13E-07	6.384034592	401	618	42	17847	PPFIA1,PRKCD,BAG3,ESPN,TOP2A,RPS6KA2,TPR,TP53,SRC,BRCA1,AKT1,SMAD4,SIN3A,PARP1,NPM1,PLK1,SIRT1,XRCC5,TERF1,ATM,APC,TERF2,HSPA1A,MCM2,ARRB2,SET,PARK2,HNRPA1,CHEK1,MAPT,HDAC6,SPTAN1,KAT2B,DNM2,MAPRE1,SMARCB1,PPARGC1A,DNMT1,LMNA,CCNB1,HMGA1,MET
GO:BP	positive regulation of response to DNA damage stimulus	GO:2001022	4.34E-07	6.362775692	100	618	20	17847	ANKRD1,PRKCD,MYC,EGFR,BRCA1,PCNA,PRKDC,PARP1,H2AFX,SIRT1,RIF1,DHX9,ATM,TRIM28,ATR,MGMT,SKIL,HMGB1,FUS,PRKCG
GO:BP	positive regulation of phosphatidylinositol 3-kinase signaling	GO:0014068	4.64E-07	6.333253175	90	618	19	17847	PTPN6,PLXNB1,SRC,PIK3R1,FYN,CBL,LYN,JAK2,SIRT1,NEDD4,INSR,GH1,IGF1R,PDGFRB,IRS2,KIT,ERBB4,KDR,PIK3CA
GO:BP	intracellular protein transport	GO:0006886	4.85E-07	6.313828009	1162	618	83	17847	TRAM1,CLTA,SAMM50,UBE2D3,RAB8A,PRKCD,BAG3,TXN,RAB1B,RPS26,SYNGR1,RAE1,TPR,KIF1A,UBA52,UBC,TP53,YWHAZ,SMAD3,YWHAG,MAPK1,PIK3R1,FYN,MDM2,AKT1,UBE2D2,STAT3,PRKACA,UBB,PTPN11,YWHAQ,YWHAB,RPS27A,HDAC3,PML,HSPA8,YWHAE,NPM1,NFKBIA,GSK3B,MAPK14,FLNA,SYK,HSPA4,ERBB2,CDKN1A,CSNK2A2,SFN,SRRM1,RNPS1,SMURF1,TRIM28,CDC42,PAK1,HGS,ARF6,TERF2,HSP90AA1,HSPA5,CHM,YWHAH,CDH1,XPO1,CDC37,NEDD4,DNCL1,BCR,PARK2,KPNA2,V…
GO:BP	protein insertion into mitochondrial membrane involved in apoptotic signaling pathway	GO:0001844	4.92E-07	6.308247296	31	618	12	17847	TP53,YWHAZ,YWHAG,YWHAQ,YWHAB,YWHAE,SFN,MAPK8,CASP8,E2F1,YWHAH,BCL2
GO:BP	cellular response to ionizing radiation	GO:0071479	5.15E-07	6.288501776	71	618	17	17847	NIPBL,TP53,GRB2,MDM2,H2AFX,MAPK14,CDKN1A,SIRT1,XRCC5,ATM,HSPA5,ATR,MGMT,XRCC6,EEF1D,DNM2,HRAS
GO:BP	regulation of protein export from nucleus	GO:0046825	5.28E-07	6.27745194	38	618	13	17847	BAG3,TXN,TPR,TP53,MDM2,PRKACA,PTPN11,YWHAE,GSK3B,SFN,XPO1,BARD1,CDK5
GO:BP	positive regulation of I-kappaB kinase/NF-kappaB signaling	GO:0043123	5.30E-07	6.276099654	184	618	27	17847	S100A4,NEK6,TRAF6,IKBKG,CTNNB1,IKBKE,FYN,ABL1,AKT1,RELA,UBE2I,TNFRSF1A,IKBKB,FLNA,MAP3K14,CHUK,CASP8,PRKCB,PARK2,TBK1,PRKCE,EEF1D,FASLG,MAP3K7,RHOA,CFLAR,FADD
GO:BP	regulation of stress-activated MAPK cascade	GO:0032872	5.35E-07	6.271881297	238	618	31	17847	MEN1,WNT7A,VEGFA,TRAF6,MYC,EGFR,MAPK1,AKT1,MAPK3,NCOR1,HDAC3,DAXX,SYK,APP,CDC42,PAK1,COPS5,PARK2,PTK2B,TNIK,MAP3K5,IGF1R,MAP2K1,HMGB1,DVL2,ITCH,MAP3K7,HRAS,GADD45G,AXIN1,FAS
GO:BP	negative regulation of protein catabolic process	GO:0042177	5.64E-07	6.249100437	135	618	23	17847	SIRT2,HFE,CDKN2A,EGFR,SMAD3,CSNK2A1,FYN,RELA,PML,FLNA,PIN1,CSNK2A2,SMARCC1,USP7,ANXA2,GABARAPL2,TAF9,PHB,PSEN1,PRKCG,MDM4,UCHL5,TAF1
GO:BP	positive regulation of epithelial cell proliferation	GO:0050679	5.65E-07	6.248102399	211	618	29	17847	NR4A1,APLNR,SOX11,WNT7A,VEGFA,MYC,AR,EGFR,JUN,CTNNB1,AKT1,PRKCA,SP1,STAT3,PLCG1,TGFBR1,ERBB2,HIF1A,SIRT1,CDC42,CCND1,STAT5A,NOTCH1,PDPK1,HMGB1,HRAS,KDR,ITGB3,CFLAR
GO:BP	positive regulation of epithelial cell migration	GO:0010634	5.89E-07	6.230169819	172	618	26	17847	WNT7A,MIR210,VEGFA,SRC,JUN,ABL1,AKT1,PRKCA,SP1,PLCG1,HIF1A,SIRT1,ARF6,STAT5A,ETS1,PTK2B,PRKCE,HDAC6,PDPK1,HMGB1,HSPB1,BCAR1,TGFBR2,KDR,ITGB3,MET
GO:BP	peptidyl-lysine acetylation	GO:0018394	5.89E-07	6.230169819	172	618	26	17847	MYOCD,EP300,CREBBP,BRCA1,HDAC2,SMAD4,MAPK3,SIN3A,NCOA1,NCOA3,RUVBL2,SIRT1,HTATIP,MYOD1,ARRB1,SET,CHEK1,ATF2,GTF2B,TAF9,KAT2B,MAP3K7,SMARCB1,PPARGC1A,TAF1,BRD7
GO:BP	regulation of plasma membrane bounded cell projection organization	GO:0120035	6.25E-07	6.203801339	683	618	58	17847	ANKRD1,PMP22,PRKCD,ESPN,PLXNB1,TUBB2B,TGFB3,WNT7A,MIR210,VEGFA,SRC,EP300,FYN,MDM2,ABL1,AKT1,HDAC2,SIN3A,TGFBR1,CRK,GSK3B,LYN,VIM,NCK1,HDAC4,SMURF1,CDC42,PAK1,APC,ARF6,CAV1,HSPA5,YWHAH,FN1,NEDD4,SF3A2,PARK2,PTK2B,DISC1,TNIK,MAPT,SRF,ILK,SKIL,MAP2K1,DNM2,DLG4,DVL2,HRAS,STK24,KIT,PSEN1,CARM1,CDK5,RHOA,IQGAP1,CFLAR,HTT
GO:BP	histone acetylation	GO:0016573	6.35E-07	6.197360528	160	618	25	17847	MYOCD,EP300,CREBBP,BRCA1,SMAD4,MAPK3,SIN3A,NCOA1,NCOA3,RUVBL2,SIRT1,HTATIP,MYOD1,ARRB1,SET,CHEK1,ATF2,GTF2B,TAF9,KAT2B,MAP3K7,SMARCB1,PPARGC1A,TAF1,BRD7
GO:BP	cellular process	GO:0009987	6.41E-07	6.192881929	16113	618	598	17847	RNF220,RORC,SNRPF,ACTR1B,PARVG,CLNS1A,HPDL,ACTR6,TMEM219,TPCN1,LPIN2,CLTA,TMEM119,CIDEC,CMTM8,SERPINA6,TMEM14C,SAMM50,CALML6,PSRC1,LRRC8A,JSRP1,ENOPH1,NFE2,CCNDBP1,GMDS,SEPHS1,AIMP2,PRAMEF6,GK5,UBE2D3,COL2A1,DNAH2,MT1G,HFE2,PTPN6,STK38,ANKRD1,ATP6AP2,COMP,OR4F17,NR1H2,CDC123,RUFY4,PPIAL4G,CSDA,ODF4,CEP250,NPHP1,MYH6,PFKFB4,PMP22,EFNB1,DUX4,MEPE,MFAP2,ATP6V1B2,FMNL3,FRAT2,PHIP,RAB8A,FHL2,NIPBL,EXO…
GO:BP	regulation of establishment of protein localization to mitochondrion	GO:1903747	6.52E-07	6.185537302	72	618	17	17847	UBE2D3,BAG3,TP53,YWHAZ,YWHAG,YWHAQ,YWHAB,YWHAE,CSNK2A2,SFN,MAPK8,CASP8,E2F1,YWHAH,BCL2,PARK2,MAPT
GO:BP	regulation of ERK1 and ERK2 cascade	GO:0070372	6.60E-07	6.180155365	298	618	35	17847	PTPN6,PLA2G2A,FGG,SRC,EGFR,JUN,ABL1,PRKCA,SMAD4,MAPK3,PTPN11,SHC1,LYN,SYK,ERBB2,PIN1,PRKCZ,APP,ARRB1,FN1,ARRB2,PTK2B,NOTCH1,PDGFRB,CSK,PHB2,MAP2K1,HMGB1,HRAS,PHB,ATF3,PTPRC,ERBB4,KDR,CFLAR
GO:BP	positive regulation of peptidase activity	GO:0010952	6.66E-07	6.176769289	199	618	28	17847	CDKN2A,MYC,SMAD3,FYN,STAT3,MAPK3,LCK,PML,PPARG,LYN,MAPK14,JAK2,SYK,SIRT1,APP,CASP8,CAV1,ARRB1,FN1,VCP,MAPT,MAP3K5,HMGB1,FASLG,RHOA,FAS,CFLAR,FADD
GO:BP	regulation of RNA polymerase II transcriptional preinitiation complex assembly	GO:0045898	6.69E-07	6.17484126	15	618	9	17847	PSMC2,TP53,ESR1,PSMC5,CREB1,THRA,HMGB1,PSMC6,PSMC4
GO:BP	mitotic G1 DNA damage checkpoint	GO:0031571	6.78E-07	6.168735647	63	618	16	17847	TP53,EP300,MDM2,PCNA,PRKDC,PML,CDK1,CDKN1A,SFN,ATM,E2F1,CCND1,RPA2,CARM1,MDM4,CCNB1
GO:BP	mitotic G1/S transition checkpoint	GO:0044819	6.78E-07	6.168735647	63	618	16	17847	TP53,EP300,MDM2,PCNA,PRKDC,PML,CDK1,CDKN1A,SFN,ATM,E2F1,CCND1,RPA2,CARM1,MDM4,CCNB1
GO:BP	positive regulation of transcription initiation from RNA polymerase II promoter	GO:0060261	7.42E-07	6.129680058	20	618	10	17847	PSMC2,TP53,ESR1,PSMC5,CREB1,SRF,GTF2B,PSMC6,TAF1,PSMC4
GO:BP	regulation of pri-miRNA transcription by RNA polymerase II	GO:1902893	7.67E-07	6.115218016	39	618	13	17847	FOS,TP53,SMAD3,JUN,NR3C1,RELA,STAT3,SMARCA4,HDAC4,HIF1A,YY1,SRF,PPARA
GO:BP	gliogenesis	GO:0042063	7.93E-07	6.100463089	300	618	35	17847	SIRT2,SOX11,HDAC1,EGFR,CTNNB1,MAPK1,ABL1,AKT1,RELA,HDAC2,STAT3,MAPK3,PTPN11,PPARG,LYN,VIM,CDK1,ERBB2,APP,CREB1,E2F1,TNFRSF1B,PTK2B,DISC1,MAPT,ILK,NDRG1,MYB,NOTCH1,CSK,MAP2K1,TAL1,PSEN1,CDK5,RHOA
GO:BP	establishment of tissue polarity	GO:0007164	8.51E-07	6.069944957	126	618	22	17847	PSMC2,WNT7A,PSMA5,ABL1,SMURF1,CDC42,SMURF2,PSMC5,ARRB2,PSMA1,PSMD4,CLTC,PSMD2,PSMA3,DVL2,PSMC1,PSMD13,RHOA,PSMC6,PSMA6,DAB2,PSMC4
GO:BP	establishment of planar polarity	GO:0001736	8.51E-07	6.069944957	126	618	22	17847	PSMC2,WNT7A,PSMA5,ABL1,SMURF1,CDC42,SMURF2,PSMC5,ARRB2,PSMA1,PSMD4,CLTC,PSMD2,PSMA3,DVL2,PSMC1,PSMD13,RHOA,PSMC6,PSMA6,DAB2,PSMC4
GO:BP	microtubule cytoskeleton organization	GO:0000226	8.61E-07	6.065022735	563	618	51	17847	ACTR1B,PSRC1,CEP250,TUBB2B,CKAP5,NEK6,TACC1,RAE1,CDK2AP2,TPR,BRCA1,CTNNB1,ABL1,NCOR1,HDAC3,NPM1,PPP2R1A,GSK3B,TUBB,FLNA,CDK1,PRKCZ,PLK1,TERF1,PAK1,APC,HSPA1A,XPO1,CHD3,MLH1,CHEK1,VCP,DISC1,MAPT,SMC1L1,HDAC6,CLTC,DCTN1,MYH9,KAT2B,AKAP9,MAPRE1,ITGB1,TUBA4A,CDK5,RHOA,LMNA,CCNB1,MET,HTT,GABARAP
GO:BP	regulation of mitochondrial outer membrane permeabilization involved in apoptotic signaling pathway	GO:1901028	8.72E-07	6.059579644	47	618	14	17847	TP53,YWHAZ,YWHAG,YWHAQ,YWHAB,YWHAE,GSK3B,SFN,MAPK8,CASP8,E2F1,HSPA1A,YWHAH,BCL2
GO:BP	thymus development	GO:0048538	8.72E-07	6.059579644	47	618	14	17847	RAF1,CTNNB1,MAPK1,ABL1,MAPK3,PRKDC,TGFBR1,ATM,BCL2,AIRE,SRF,MAP2K1,PSEN1,FADD
GO:BP	G1 DNA damage checkpoint	GO:0044783	8.75E-07	6.05777334	64	618	16	17847	TP53,EP300,MDM2,PCNA,PRKDC,PML,CDK1,CDKN1A,SFN,ATM,E2F1,CCND1,RPA2,CARM1,MDM4,CCNB1
GO:BP	protein insertion into membrane	GO:0051205	8.75E-07	6.05777334	64	618	16	17847	SAMM50,TP53,YWHAZ,EGFR,YWHAG,YWHAQ,YWHAB,YWHAE,HSPA4,SFN,MAPK8,CASP8,HSP90AA1,E2F1,YWHAH,BCL2
GO:BP	non-canonical Wnt signaling pathway	GO:0035567	8.78E-07	6.056588862	150	618	24	17847	PSMC2,WNT7A,PSMA5,CTNNB1,ABL1,SMURF1,CDC42,SMURF2,PSMC5,ARRB2,PSMA1,PSMD4,CLTC,PSMD2,PSMA3,DVL2,MAP3K7,PSMC1,PSMD13,RHOA,PSMC6,PSMA6,DAB2,PSMC4
GO:BP	cellular homeostasis	GO:0019725	8.81E-07	6.055255734	995	618	74	17847	CLNS1A,TPCN1,LRRC8A,JSRP1,MT1G,HFE2,PTPN6,ATP6V1B2,BAG3,RYR1,TXN,MEN1,HFE,RFC4,MT2A,APLNR,C9ORF47,ATP2A1,RAF1,CLN5,MIR210,ALAS2,ESR1,MYC,SMAD3,MAPK1,PIK3R1,FYN,ABL1,SMAD4,PRKACA,PCNA,MAPK3,PLCG1,LCK,SIN3A,PML,SMARCA4,YWHAE,LYN,JAK2,HIF1A,SIRT1,VDR,APP,TERF1,TERF2,CAV1,BCL2,ARRB1,PRKCB,PARK2,PTK2B,PRKCE,DISC1,SRF,DCTN1,IGF1R,PDPK1,ANXA2,HMGB1,RPA2,DLG4,FASLG,IRS2,ATF4,SMARCB1,PSEN1,PPARGC1A,CDK5,P…
GO:BP	T cell differentiation	GO:0030217	9.05E-07	6.043524858	243	618	31	17847	RORC,RUNX2,RUNX1,CDKN2A,TP53,CTNNB1,ABL1,STAT3,RARA,PRKDC,LCK,SYK,ERBB2,PRKCZ,ZBTB16,VAV1,BCL2,FANCA,AIRE,SRF,MYB,BCL3,HMGB1,ZAP70,SOS1,KIT,RHOA,TGFBR2,PTPRC,FADD,JAK3
GO:BP	chordate embryonic development	GO:0043009	9.05E-07	6.043381346	635	618	55	17847	COL2A1,ATP6AP2,CSDA,MYH6,NIPBL,TCAP,TGFB3,RXRA,FOLR1,EPAS1,RUNX2,SOX11,DAD1,VEGFA,TP53,GRB2,EP300,TRAF6,AR,EGFR,SMAD3,SMAD2,BRCA1,CTNNB1,MAPK1,ABL1,AKT1,SMAD4,PRKACA,RARA,PRKDC,PLCG1,SIN3A,TGFBR1,NCOA1,CEBPB,HIF1A,ATM,CASP8,TRIM28,CEBPA,CHEK1,SRF,MYH9,SKIL,NOTCH1,MAP2K1,DVL2,SMARCB1,ITGB1,CUL4A,PSEN1,TGFBR2,PSMC4,CCNB1
GO:BP	negative regulation of protein binding	GO:0032091	9.08E-07	6.041896546	104	618	20	17847	PRKCD,HFE,AKT1,ACTB,MAPK3,RUVBL2,GSK3B,PIN1,STUB1,MAPK8,CAV1,HSPA5,PPP1CA,ARRB2,DISC1,GTF2F1,PPARA,CARM1,DAB2,MET
GO:BP	cell junction assembly	GO:0034329	1.00E-06	5.998643588	244	618	31	17847	NPHP1,CLDN5,PIP5K1C,RUNX1,VEGFA,SRC,SMAD3,CTNNB1,ABL1,PRKCA,ACTB,PRKACA,IKBKB,FLNA,CDC42,APC,ACTG1,CAV1,CDH1,BCL2,FN1,BCR,PTK2B,SRF,ILK,STRN,ACTN1,PDPK1,RHOA,IQGAP1,KDR
GO:BP	positive regulation of proteasomal protein catabolic process	GO:1901800	1.09E-06	5.964188808	105	618	20	17847	SIRT2,TRIB1,PSMC2,MDM2,AKT1,GSK3B,SUMO1,SUMO2,PLK1,STUB1,CAV1,HSPA1A,CEBPA,PARK2,VCP,PSMC1,PSEN1,TAF1,DAB2,PSMC4
GO:BP	negative regulation of extrinsic apoptotic signaling pathway	GO:2001237	1.09E-06	5.964188808	105	618	20	17847	COL2A1,PHIP,FGG,RAF1,SRC,AR,BRCA1,FYN,AKT1,RELA,TGFBR1,CASP8,HSPA1A,BCL2,FASLG,FAS,LMNA,CFLAR,HTT,FADD
GO:BP	internal peptidyl-lysine acetylation	GO:0018393	1.09E-06	5.963592503	164	618	25	17847	MYOCD,EP300,CREBBP,BRCA1,SMAD4,MAPK3,SIN3A,NCOA1,NCOA3,RUVBL2,SIRT1,HTATIP,MYOD1,ARRB1,SET,CHEK1,ATF2,GTF2B,TAF9,KAT2B,MAP3K7,SMARCB1,PPARGC1A,TAF1,BRD7
GO:BP	regulation of cell projection organization	GO:0031344	1.09E-06	5.961800473	693	618	58	17847	ANKRD1,PMP22,PRKCD,ESPN,PLXNB1,TUBB2B,TGFB3,WNT7A,MIR210,VEGFA,SRC,EP300,FYN,MDM2,ABL1,AKT1,HDAC2,SIN3A,TGFBR1,CRK,GSK3B,LYN,VIM,NCK1,HDAC4,SMURF1,CDC42,PAK1,APC,ARF6,CAV1,HSPA5,YWHAH,FN1,NEDD4,SF3A2,PARK2,PTK2B,DISC1,TNIK,MAPT,SRF,ILK,SKIL,MAP2K1,DNM2,DLG4,DVL2,HRAS,STK24,KIT,PSEN1,CARM1,CDK5,RHOA,IQGAP1,CFLAR,HTT
GO:BP	regulation of type I interferon production	GO:0032479	1.17E-06	5.933602841	128	618	22	17847	IRF5,EP300,CREBBP,CTNNB1,IKBKE,RELA,NFKB1,PTPN11,PRKDC,STAT1,SYK,PIN1,XRCC5,CHUK,DHX9,NFKB2,YY1,TBK1,XRCC6,HMGB1,ITCH,PCBP2
GO:BP	cellular response to interleukin-6	GO:0071354	1.19E-06	5.923719816	48	618	14	17847	MIR99A,FGG,RELA,SMAD4,NFKB1,STAT3,PTPN11,CBL,STAT1,JAK2,JAK1,CEBPA,PHB,PPARGC1A
GO:BP	Fc receptor mediated stimulatory signaling pathway	GO:0002431	1.19E-06	5.923635863	140	618	23	17847	PRKCD,GRB2,SRC,MAPK1,PIK3R1,FYN,ABL1,ACTB,MAPK3,PLCG1,CRK,LYN,NCK1,SYK,CDC42,PAK1,ACTG1,VAV1,HSP90AA1,PRKCE,CSK,PTPRC,PIK3CA
GO:BP	regulation of protein ubiquitination	GO:0031396	1.19E-06	5.923364498	204	618	28	17847	AIMP2,CDKN2A,TRAF6,BRCA1,FYN,ABL1,AKT1,UBB,HDAC3,TGFBR1,DAXX,PIN1,PLK1,STUB1,CDK9,CAV1,HSP90AA1,HSPA5,HSPA1A,ARRB1,ARRB2,PARK2,PRKCE,PSEN1,CDK5,PRKCG,AXIN1,TAF1
GO:BP	membrane organization	GO:0061024	1.26E-06	5.900934779	885	618	68	17847	CLTA,SAMM50,RAB8A,PRKCD,NEK6,FOLR1,RAB1B,FNBP1,SYNGR1,PIP5K1C,KLHL21,UBA52,UBC,TP53,YWHAZ,GRB2,AR,EGFR,YWHAG,AKT1,PRKCA,ACTB,STAT3,UBB,CBL,YWHAQ,YWHAB,RPS27A,HSPA8,PPP2CA,YWHAE,PPP2R1A,GSK3B,PPARG,CDK1,HSPA4,PLK1,SFN,SMURF1,MAPK8,CASP8,CDC42,HGS,ACTG1,CAV1,HSP90AA1,E2F1,HSPA1A,YWHAH,BCL2,ARRB1,ARRB2,PRKCB,PARK2,ATF2,CLTC,DCTN1,NDRG1,MYH9,ANXA2,DNM2,DLG4,DVL2,RHOA,PTPRC,DAB2,LMNA,CCNB1
GO:BP	regulation of striated muscle tissue development	GO:0016202	1.33E-06	5.874997486	153	618	24	17847	CSDA,SIRT2,MYOCD,SMAD3,CTNNB1,MAPK1,SMAD4,TGFBR1,HDAC4,MAPK14,CDK1,PIN1,PAK1,CREB1,MYOD1,BCL2,ARRB2,YY1,NOTCH1,PPARA,TGFBR2,ERBB4,DDX17,CCNB1
GO:BP	cardiac muscle cell differentiation	GO:0055007	1.36E-06	5.866484448	129	618	22	17847	MYH6,FHL2,TCAP,MYL2,MYOCD,MYOM1,RXRA,MYH11,VEGFA,SMAD4,RARA,CDK1,PIN1,PAK1,ARRB2,YY1,SRF,PDGFRB,ITGB1,PPARA,LMNA,CCNB1
GO:BP	regulation of microtubule cytoskeleton organization	GO:0070507	1.41E-06	5.851870905	192	618	27	17847	PSRC1,CEP250,RAE1,CDK2AP2,TPR,BRCA1,CTNNB1,ABL1,NPM1,GSK3B,PLK1,TERF1,PAK1,APC,HSPA1A,XPO1,CHEK1,MAPT,SMC1L1,HDAC6,CLTC,DCTN1,KAT2B,AKAP9,MAPRE1,RHOA,MET
GO:BP	positive regulation of peptidyl-tyrosine phosphorylation	GO:0050731	1.41E-06	5.851870905	192	618	27	17847	TSLP,VEGFA,TP53,SRC,FYN,ABL1,HDAC2,STAT3,PTPN11,TNFRSF1A,LYN,JAK2,SYK,ARRB2,PTK2B,PAK2,GH1,DLG4,DVL2,TAL1,KIT,UNC119,IQGAP1,PTPRC,ERBB4,TNFRSF14,ITGB3
GO:BP	mesenchyme development	GO:0060485	1.49E-06	5.827592933	277	618	33	17847	CRELD1,EFNB1,S100A4,TGFB3,FOLR1,SOX11,ACTA1,TSPY2,MYC,SMAD3,SMAD2,CTNNB1,MAPK1,MDM2,HDAC2,SMAD4,MAPK3,TGFBR1,PPP2CA,STAT1,GSK3B,HIF1A,TRIM28,BCL2,FN1,NOTCH1,PDGFRB,TGFBR2,STRAP,ERBB4,MDM4,DDX17,DAB2
GO:BP	cell death in response to oxidative stress	GO:0036473	1.50E-06	5.825351032	96	618	19	17847	PRKCD,TXN,CTNNB1,FYN,AKT1,PARP1,PML,JAK2,HIF1A,SIRT1,BCL2,PARK2,HDAC6,MAP3K5,SFPQ,ATF4,STK24,HSPB1,MET
GO:BP	protein acetylation	GO:0006473	1.50E-06	5.824385838	206	618	28	17847	MYOCD,EP300,CREBBP,BRCA1,HDAC2,SMAD4,MAPK3,SIN3A,NCOA1,NCOA3,RUVBL2,GSK3B,SIRT1,HTATIP,MYOD1,ARRB1,SET,CHEK1,MAPT,ATF2,GTF2B,TAF9,KAT2B,MAP3K7,SMARCB1,PPARGC1A,TAF1,BRD7
GO:BP	DNA damage response, signal transduction by p53 class mediator	GO:0030330	1.54E-06	5.811640259	107	618	20	17847	ANKRD1,TP53,EP300,BRCA1,MDM2,PCNA,PML,CDK1,CDKN1A,SIRT1,HTATIP,SFN,ATM,E2F1,ATR,NDRG1,BCL3,CARM1,MDM4,CCNB1
GO:BP	muscle adaptation	GO:0043500	1.58E-06	5.800051942	130	618	22	17847	MYH6,TCAP,MYH7,ACTA1,MYOZ1,SMAD3,PRKCA,SMAD4,PARP1,TNFRSF1A,HDAC4,PIN1,CDK9,PAK1,MYOD1,TNFRSF1B,YY1,NOTCH1,PPARA,PPARGC1A,LMNA,CFLAR
GO:BP	type I interferon production	GO:0032606	1.58E-06	5.800051942	130	618	22	17847	IRF5,EP300,CREBBP,CTNNB1,IKBKE,RELA,NFKB1,PTPN11,PRKDC,STAT1,SYK,PIN1,XRCC5,CHUK,DHX9,NFKB2,YY1,TBK1,XRCC6,HMGB1,ITCH,PCBP2
GO:BP	receptor metabolic process	GO:0043112	1.78E-06	5.749578854	194	618	27	17847	CLTA,VEGFA,GRB2,HDAC1,HDAC2,PPARG,JAK2,SYK,HIF1A,SMURF1,CAV1,ARRB1,ARRB2,NEDD4,HDAC6,CLTC,ANXA2,DNM2,DLG4,ITCH,ITGB1,PPARA,PSEN1,CDK5,ITGB3,NR1H3,ADRBK1
GO:BP	lymphocyte proliferation	GO:0046651	1.79E-06	5.746302926	279	618	33	17847	PTPN6,EFNB1,PRKCD,PLA2G2A,CD320,SOX11,CDKN2A,TP53,TRAF6,CTNNB1,FYN,ABL1,CEBPB,LYN,NCK1,SYK,ERBB2,CDKN1A,ATM,BCL2,TNFRSF1B,TBK1,BTK,HMGB1,ZAP70,SOS1,ITCH,IRS2,TGFBR2,PTPRC,TNFRSF14,FADD,JAK3
GO:BP	positive regulation of DNA biosynthetic process	GO:2000573	1.83E-06	5.737899765	67	618	16	17847	RFC4,SRC,MYC,CTNNB1,MAPK1,MAPK3,XRCC5,ATM,HSP90AA1,ARRB2,ATR,PTK2B,HNRPA1,PDGFRB,TCP1,CCT5
GO:BP	regulation of smooth muscle cell proliferation	GO:0048660	1.83E-06	5.737393424	168	618	25	17847	TRIB1,MYOCD,TGFB3,TRAF6,EGFR,JUN,CTNNB1,MDM2,AKT1,PRKDC,STAT1,PPARG,HDAC4,JAK2,CDKN1A,XRCC5,PAK1,XRCC6,ILK,MAP3K5,MYB,PDGFRB,PPARGC1A,DNMT1,TGFBR2
GO:BP	mitotic cell cycle checkpoint	GO:0007093	1.83E-06	5.737393424	168	618	25	17847	TOP2A,TPR,TP53,EP300,BRCA1,MDM2,RB1,PCNA,PRKDC,PML,CDK1,CDKN1A,PLK1,SFN,ATM,APC,E2F1,CCND1,CHEK1,ATF2,RPA2,HRAS,CARM1,MDM4,CCNB1
GO:BP	regulation of cellular ketone metabolic process	GO:0010565	1.84E-06	5.736105442	181	618	26	17847	NR1H2,PSMC2,ADIPOR2,PSMA5,BRCA1,AKT1,NCOR2,PPARG,SIRT1,IRS1,PSMC5,CAV1,PSMA1,PSMD4,PRKCE,PSMD2,PSMA3,IRS2,PSMC1,PPARA,PSMD13,PPARGC1A,PSMC6,PSMA6,PSMC4,NR1H3
GO:BP	regulation of cold-induced thermogenesis	GO:0120161	1.84E-06	5.735693286	143	618	23	17847	NR1H2,MFAP2,ADIPOR2,SCD,EPAS1,SLN,VEGFA,RB1,HDAC3,CEBPB,JAK2,SYK,PRKAB1,APC,CAV1,THRA,IGF1R,NOTCH1,ATF4,PPARGC1A,GADD45G,GRB10,NR1H3
GO:BP	cold-induced thermogenesis	GO:0106106	1.84E-06	5.735693286	143	618	23	17847	NR1H2,MFAP2,ADIPOR2,SCD,EPAS1,SLN,VEGFA,RB1,HDAC3,CEBPB,JAK2,SYK,PRKAB1,APC,CAV1,THRA,IGF1R,NOTCH1,ATF4,PPARGC1A,GADD45G,GRB10,NR1H3
GO:BP	regulation of peptidase activity	GO:0052547	2.08E-06	5.681209655	456	618	44	17847	SERPINA6,NR4A1,RAF1,CDKN2A,VEGFA,SRC,HDAC1,MYC,SMAD3,CSNK2A1,FYN,MDM2,AKT1,STAT3,MAPK3,LCK,PML,YWHAE,PPARG,LYN,MAPK14,JAK2,SYK,SIRT1,APP,SFN,CASP8,CAV1,ARRB1,FN1,ARRB2,MGMT,PAK2,VCP,MAPT,MAP3K5,HMGB1,PSMA3,FASLG,RHOA,UCHL5,FAS,CFLAR,FADD
GO:BP	multicellular organismal reproductive process	GO:0048609	2.14E-06	5.670553805	838	618	65	17847	TMEM119,CSDA,ODF4,NPHP1,SIRT2,MEN1,TOP2A,TGFB3,RXRA,RPS6KA2,PRSS21,TSPY2,ESR1,SRC,AR,EGFR,CTNNB1,MAPK1,AKT1,HDAC2,SMAD4,PRKACA,UBB,RARA,PCNA,MAPK3,PTPN11,TGFBR1,H2AFX,NCOR2,TBP,NCOA1,PPP2R1A,HDAC4,PLK1,SIRT1,VDR,CSNK2A2,APP,ATM,THRB,ZBTB16,THRA,E2F1,HSPA5,BCL2,ARRB1,FANCA,ARRB2,ETS1,MLH1,YY1,PTK2B,NRIP1,SKIL,DDX20,NOTCH1,KHDRBS1,SOS1,DNM2,SIAH1,KIT,ITGB1,CCNB1,BMPR1B
GO:BP	mononuclear cell proliferation	GO:0032943	2.16E-06	5.665845372	281	618	33	17847	PTPN6,EFNB1,PRKCD,PLA2G2A,CD320,SOX11,CDKN2A,TP53,TRAF6,CTNNB1,FYN,ABL1,CEBPB,LYN,NCK1,SYK,ERBB2,CDKN1A,ATM,BCL2,TNFRSF1B,TBK1,BTK,HMGB1,ZAP70,SOS1,ITCH,IRS2,TGFBR2,PTPRC,TNFRSF14,FADD,JAK3
GO:BP	regulation of muscle organ development	GO:0048634	2.29E-06	5.640179701	157	618	24	17847	CSDA,SIRT2,MYOCD,SMAD3,CTNNB1,MAPK1,SMAD4,TGFBR1,HDAC4,MAPK14,CDK1,PIN1,PAK1,CREB1,MYOD1,BCL2,ARRB2,YY1,NOTCH1,PPARA,TGFBR2,ERBB4,DDX17,CCNB1
GO:BP	myofibril assembly	GO:0030239	2.32E-06	5.635365916	68	618	16	17847	ANKRD1,MYH6,TCAP,MYL2,MYOM1,TNNT3,MYH11,ACTA1,SYNPO2L,MYOZ1,SMAD4,ACTG1,SRF,PDGFRB,ITGB1,CFLAR
[truncated: 1,653 more rows]
