# Supplementary material for: Identification of a Two-Gene (PML-EPB41) Signature With Independent Prognostic Value in Osteosarcoma
Source: Front Oncol. 2020 Jan 24;9:1578. doi: 10.3389/fonc.2019.01578 (PMC6992559; doi:10.3389/fonc.2019.01578)
Supplement: Supplementary file 4 [file Table_4.xlsx]

## Sheet: Sheet1
UBC	481	UBC	1.9336	0.032701	0.51717	FALSE	0	0	5	10926530	0.161887	34.8773	481	0	0.8833	0.0179673
TP53	243	TP53	2.18105	0.0528177	0.458494	FALSE	0	0	5	3197820	0.0401006	41.3704	243	0	0.852368	0.0251011
YWHAZ	192	YWHAZ	2.24568	0.0372491	0.445299	FALSE	0	0	5	1994216	0.0244737	36.1875	192	0	0.84429	0.02335
ESR1	188	ESR1	2.2116	0.0892024	0.452162	FALSE	0	0	5	1982232	0.0212532	51.5957	188	0	0.84855	0.0315087
GRB2	180	GRB2	2.25719	0.0577902	0.443028	FALSE	0	0	5	2311920	0.0321526	35.8833	180	0	0.842851	0.0233855
SRC	178	1	SRC	2.28287	0.0813813	0.438045	FALSE	0	0	5	1822514	0.019512	45.7809	178	0	0.839641	0.0305003
EP300	176	EP300	2.29039	0.0912987	0.436606	FALSE	0	0	5	1445846	0.0151386	47.7216	176	0	0.838701	0.031985
CREBBP	161	CREBBP	2.29659	0.109006	0.435428	FALSE	0	0	5	1121314	0.0112108	50.8075	161	0	0.837926	0.0340761
TRAF6	159	1	TRAF6	2.28331	0.0347902	0.43796	FALSE	0	0	5	1951714	0.0241604	36.3208	159	0	0.839586	0.0241538
HDAC1	156	HDAC1	2.30279	0.0987593	0.434256	FALSE	0	0	5	1328592	0.0152395	49.3077	156	0	0.837151	0.0332313
FOS	147	1	2	FOS	2.42452	0.0374616	0.412452	FALSE	0	0	5	1929532	0.0281349	29.898	147	0	0.821934	0.0244718
MYC	136	1	MYC	2.36078	0.0659041	0.423589	FALSE	0	0	5	1241836	0.0147608	46.3971	136	0	0.829903	0.033479
AR	133	AR	2.31297	0.108567	0.432345	FALSE	0	0	5	872460	0.00846859	55.3308	133	0	0.835879	0.0374261
EGFR	132	1	EGFR	2.29438	0.0822346	0.435848	FALSE	0	0	5	1555212	0.0193149	47.6894	132	0	0.838203	0.0317838
SMAD3	130	SMAD3	2.29925	0.108169	0.434925	FALSE	0	0	5	943990	0.00877572	55.3385	130	0	0.837594	0.036527
JUN	129	JUN	2.3382	0.110707	0.427679	FALSE	0	0	5	950506	0.0101595	52.2016	129	0	0.832725	0.0368231
SMAD2	129	SMAD2	2.3351	0.0717054	0.428246	FALSE	0	0	5	1155428	0.0137106	46.7054	129	0	0.833112	0.032543
BRCA1	124	1	BRCA1	2.31873	0.105298	0.431271	FALSE	0	0	5	871848	0.00837372	56.9758	124	0	0.835159	0.0384343
IKBKG	123	1	IKBKG	2.33555	0.0638411	0.428165	FALSE	0	0	5	1129970	0.0148897	42.9512	123	0	0.833057	0.0298197
CSNK2A1	123	CSNK2A1	2.34706	0.069972	0.426066	FALSE	0	0	5	1099698	0.0135517	45.1545	123	0	0.831618	0.0320014
ACTA1	123	1	2	ACTA1	2.47942	0.0218579	0.403321	FALSE	0	0	5	1866828	0.0279081	24.813	123	0	0.815073	0.0220235
RAF1	122	1	2	RAF1	2.37716	0.0577158	0.42067	FALSE	0	0	5	1370668	0.0194269	39.6967	122	0	0.827855	0.0295904
YWHAG	121	YWHAG	2.35414	0.0735537	0.424784	FALSE	0	0	5	977448	0.012058	41.5289	121	0	0.830733	0.0296493
CTNNB1	120	CTNNB1	2.33599	0.0714286	0.428084	FALSE	0	0	5	1129386	0.0135257	47.6583	120	0	0.833001	0.033165
MAPK1	118	1	MAPK1	2.31164	0.089816	0.432593	FALSE	0	0	5	895234	0.00934392	53.4915	118	0	0.836045	0.0357394
IKBKE	116	IKBKE	2.40328	0.031934	0.416099	FALSE	0	0	5	897274	0.0105316	35.3276	116	0	0.824591	0.0274301
PIK3R1	114	PIK3R1	2.40018	0.101382	0.416636	FALSE	0	0	5	875842	0.00947203	45.2105	114	0	0.824978	0.0343345
FYN	113	FYN	2.50243	0.0982933	0.399611	FALSE	0	0	5	636644	0.00746972	36.9912	113	0	0.812196	0.0333094
MDM2	113	1	MDM2	2.35458	0.0756953	0.424704	FALSE	0	0	5	918802	0.0113577	48.9381	113	0	0.830677	0.0348369
PRKCD	112	1	2	PRKCD	2.46614	0.0519627	0.405493	FALSE	0	0	5	1485216	0.0184425	36.6964	112	0	0.816733	0.0308058
ABL1	109	ABL1	2.35547	0.0992185	0.424544	FALSE	0	0	5	887524	0.00925751	52.3486	109	0	0.830567	0.0372193
RXRA	109	1	2	RXRA	2.57415	0.0920829	0.388478	FALSE	0	0	6	658240	0.00760313	35	109	0	0.803232	0.0351744
AKT1	107	AKT1	2.32846	0.0906366	0.429468	FALSE	0	0	5	979408	0.0112342	55.8318	107	0	0.833942	0.0378267
UBE2D3	107	1	2	UBE2D3	2.60159	0.0151649	0.38438	FALSE	0	0	6	1505850	0.0163569	20.2336	107	0	0.799801	0.0219346
NR3C1	106	NR3C1	2.37406	0.109614	0.421219	FALSE	0	0	5	660638	0.00655222	56.934	106	0	0.828243	0.0411397
UBE2D2	104	1	UBE2D2	2.62727	0.0196042	0.380623	FALSE	0	0	5	1361882	0.0143068	19.6058	104	0	0.796591	0.0226445
RB1	103	RB1	2.44223	0.0970874	0.409462	FALSE	0	0	6	501978	0.00567187	46.5243	103	0	0.819721	0.0371445
PTPN6	101	1	2	PTPN6	2.59672	0.0912871	0.385101	FALSE	0	0	5	1444312	0.0162317	31.5644	101	0	0.800409	0.033657
PRKCA	101	PRKCA	2.4409	0.049901	0.409684	FALSE	0	0	5	826280	0.0104128	37.802	101	0	0.819887	0.030472
ACTB	100	ACTB	2.39929	0.0581818	0.41679	FALSE	0	0	5	814966	0.0106123	41.27	100	0	0.825089	0.0313861
HSPCA	100	HSPCA	2.32315	0.130909	0.43045	FALSE	0	0	5	596384	0.00555196	61.23	100	0	0.834606	0.0412601
RELA	100	RELA	2.40903	0.115758	0.415105	FALSE	0	0	5	529028	0.00503773	56.74	100	0	0.823871	0.0430099
SP1	99	SP1	2.35901	0.163059	0.423907	FALSE	0	0	5	587646	0.00552917	68.1616	99	0	0.830124	0.0483472
HDAC2	94	HDAC2	2.47942	0.13315	0.403321	FALSE	0	0	6	368630	0.00328654	52.7766	94	0	0.815073	0.0439439
UBE2I	93	UBE2I	2.47676	0.0708275	0.403753	FALSE	0	0	6	724482	0.00869171	42.7204	93	0	0.815405	0.0364249
SMAD4	91	SMAD4	2.43116	0.107204	0.411326	FALSE	0	0	5	667798	0.00767113	49.8681	91	0	0.821104	0.0397693
NFKB1	88	NFKB1	2.44931	0.132445	0.408278	FALSE	0	0	5	383662	0.00364808	55.6477	88	0	0.818836	0.0437992
STAT3	88	STAT3	2.41434	0.151254	0.414191	FALSE	0	0	5	453008	0.00414574	60.7727	88	0	0.823207	0.0462502
MCC	85	MCC	2.59672	0.0389356	0.385101	FALSE	0	0	5	481768	0.00633774	28.6235	85	0	0.800409	0.0304824
PRKACA	85	PRKACA	2.4772	0.0689076	0.403681	FALSE	0	0	5	572098	0.00781246	39.1294	85	0	0.81535	0.0330489
UBB	84	UBB	2.43515	0.102983	0.410653	FALSE	0	0	5	371990	0.00373435	47.6667	84	0	0.820606	0.0372979
RARA	82	1	RARA	2.51217	0.124059	0.398062	FALSE	0	0	6	324292	0.00309906	48.2195	82	0	0.810978	0.0426236
PCNA	82	PCNA	2.47189	0.0809997	0.404549	FALSE	0	0	6	559386	0.00678745	45.878	82	0	0.816014	0.0388074
VHL	82	1	VHL	2.40593	0.0478772	0.415639	FALSE	0	0	6	826426	0.011265	44.4146	82	0	0.824259	0.0333873
CALM1	80	CALM1	2.50863	0.0471519	0.398624	FALSE	0	0	5	681264	0.00834995	44.3875	80	0	0.811421	0.0392794
UBA52	79	1	2	UBA52	2.45551	0.100941	0.407247	FALSE	0	0	5	377414	0.00398696	44.6709	79	0	0.818061	0.0359567
MAPK3	79	MAPK3	2.50111	0.0769231	0.399823	FALSE	0	0	5	387752	0.00412339	46.4684	79	0	0.812362	0.0398669
PTPN11	78	PTPN11	2.68349	0.147519	0.372649	FALSE	0	0	5	727110	0.00573925	37.4872	78	0	0.789564	0.0469603
CSNK2B	78	1	2	CSNK2B	2.56662	0.0469531	0.389617	FALSE	0	0	6	596728	0.00828615	31.5513	78	0	0.804172	0.031183
PRKDC	78	PRKDC	2.43426	0.118215	0.410802	FALSE	0	0	5	420786	0.00418442	58.2179	78	0	0.820717	0.0450555
NCOR1	78	NCOR1	2.5073	0.165834	0.398835	FALSE	0	0	6	264690	0.00225408	57.4487	78	0	0.811587	0.0499989
CDKN2A	77	1	2	CDKN2A	2.55467	0.0570745	0.39144	FALSE	0	0	6	742670	0.0102395	36.6753	77	0	0.805666	0.0347474
PLCG1	77	PLCG1	2.53386	0.141148	0.394654	FALSE	0	0	5	333228	0.00371542	43.0779	77	0	0.808267	0.0407443
LCK	76	LCK	2.46038	0.12	0.406441	FALSE	0	0	5	449980	0.0045194	50.5263	76	0	0.817452	0.041168
CBL	76	CBL	2.41921	0.165614	0.413358	FALSE	0	0	5	489676	0.00509326	59.3816	76	0	0.822598	0.0455178
SHC1	76	SHC1	2.5799	0.201404	0.387612	FALSE	0	0	5	277980	0.00253901	48.9605	76	0	0.802512	0.0497566
YWHAQ	75	YWHAQ	2.47676	0.0652252	0.403753	FALSE	0	0	5	391968	0.00421484	44.9333	75	0	0.815405	0.0379131
YWHAB	74	YWHAB	2.45905	0.0818216	0.406661	FALSE	0	0	5	342444	0.00328247	46.7703	74	0	0.817618	0.0377461
SIN3A	74	1	SIN3A	2.60248	0.135135	0.384249	FALSE	0	0	6	184248	0.00172938	46.2297	74	0	0.79969	0.0474151
RPS27A	74	RPS27A	2.48163	0.112181	0.402961	FALSE	0	0	5	299326	0.00276422	47.1081	74	0	0.814796	0.0397202
HDAC3	74	HDAC3	2.44267	0.19104	0.409387	FALSE	0	0	5	275978	0.00224195	67.8108	74	0	0.819666	0.0533417
PARP1	74	PARP1	2.50288	0.135135	0.39954	FALSE	0	0	6	351670	0.00365318	59.6622	74	0	0.81214	0.050624
PML	73	PML	2.45418	0.173135	0.407468	FALSE	0	0	6	277978	0.00277942	65.8767	73	0	0.818227	0.0519424
SMARCA4	73	SMARCA4	2.51881	0.159817	0.397012	FALSE	0	0	6	310154	0.0029568	59.5342	73	0	0.810148	0.0518472
TGFBR1	72	TGFBR1	2.45905	0.108372	0.406661	FALSE	0	0	5	652980	0.00704426	50.7083	72	0	0.817618	0.0414507
HSPA8	72	1	HSPA8	2.41257	0.126761	0.414495	FALSE	0	0	5	337608	0.00310491	65.4028	72	0	0.823429	0.0486524
PPP2CA	71	PPP2CA	2.60425	0.100604	0.383988	FALSE	0	0	5	398292	0.00484592	36.7887	71	0	0.799469	0.0381645
HIST1H3A	70	HIST1H3A	2.63258	0.10352	0.379855	FALSE	0	0	5	238194	0.00271874	39.8143	70	0	0.795927	0.0438663
YWHAE	70	YWHAE	2.44976	0.140373	0.408204	FALSE	0	0	5	362584	0.00428357	51.5429	70	0	0.81878	0.0413425
H2AFX	70	H2AFX	2.50066	0.0906832	0.399894	FALSE	0	0	5	307806	0.0033119	50.2857	70	0	0.812417	0.0438686
NCOR2	69	1	NCOR2	2.5923	0.209719	0.385758	FALSE	0	0	5	187172	0.00148743	60.6957	69	0	0.800963	0.0599024
NPM1	69	NPM1	2.4108	0.112106	0.4148	FALSE	0	0	5	390018	0.00378765	65.1159	69	0	0.82365	0.0488858
PPP2R2B	69	1	PPP2R2B	2.52722	0.0643649	0.395691	FALSE	0	0	5	349164	0.003819	44.5797	69	0	0.809097	0.0404556
STAT1	68	STAT1	2.41833	0.123354	0.413509	FALSE	0	0	5	395388	0.00398116	61.8971	68	0	0.822709	0.0464344
FHL2	68	1	2	FHL2	2.49491	0.0535557	0.400816	FALSE	0	0	6	664354	0.0106384	42.1176	68	0	0.813136	0.0360744
NFKBIA	67	NFKBIA	2.42231	0.129806	0.412829	FALSE	0	0	5	378122	0.0033239	65.2537	67	0	0.822211	0.0496641
TBP	67	1	TBP	2.58079	0.134328	0.387479	FALSE	0	0	6	354168	0.00402784	50.7015	67	0	0.802402	0.0492624
CRK	67	CRK	2.62727	0.149254	0.380623	FALSE	0	0	5	184360	0.0018808	41.2537	67	0	0.796591	0.0469715
PCAF	66	PCAF	2.48296	0.135198	0.402746	FALSE	0	0	5	234066	0.0021985	59.5606	66	0	0.81463	0.0497998
NCOA1	66	NCOA1	2.6649	0.174825	0.375249	FALSE	0	0	6	201434	0.00188668	49.8636	66	0	0.791888	0.0566288
NCOA3	66	NCOA3	2.50022	0.211655	0.399965	FALSE	0	0	6	209920	0.00163848	67.8485	66	0	0.812472	0.0573401
RUVBL2	65	RUVBL2	2.48429	0.0899038	0.40253	FALSE	0	0	5	321086	0.00361138	52.8462	65	0	0.814464	0.0439158
PPP2R1A	65	PPP2R1A	2.47632	0.170192	0.403826	FALSE	0	0	5	416606	0.00501874	53.2923	65	0	0.81546	0.0445588
GSK3B	65	GSK3B	2.46835	0.0870192	0.405129	FALSE	0	0	5	365006	0.00439853	52.8769	65	0	0.816456	0.0434694
PPARG	64	1	PPARG	2.56972	0.102679	0.389147	FALSE	0	0	5	205054	0.00198784	50.5312	64	0	0.803785	0.0480495
MCM7	64	MCM7	2.55644	0.0962302	0.391169	FALSE	0	0	5	336354	0.00399583	43.2969	64	0	0.805445	0.0408938
EEF1A1	64	EEF1A1	2.43515	0.047123	0.410653	FALSE	0	0	5	528098	0.00769839	48.7344	64	0	0.820606	0.0381235
NR4A1	64	1	2	NR4A1	2.57282	0.0515873	0.388679	FALSE	0	0	5	654028	0.00924054	41.5156	64	0	0.803398	0.0407703
CEBPB	64	CEBPB	2.50863	0.204365	0.398624	FALSE	0	0	6	211114	0.00188696	66.8125	64	0	0.811421	0.0581718
SMAD1	63	SMAD1	2.55423	0.112135	0.391508	FALSE	0	0	6	315528	0.00351646	47.0952	63	0	0.805722	0.0442593
SUMO1	63	SUMO1	2.57016	0.135689	0.38908	FALSE	0	0	5	234306	0.00233242	54.6825	63	0	0.80373	0.0524175
TNFRSF1A	63	TNFRSF1A	2.52413	0.0711726	0.396177	FALSE	0	0	5	248220	0.00257556	47.2857	63	0	0.809484	0.0427118
LYN	63	1	LYN	2.53032	0.129032	0.395206	FALSE	0	0	5	349638	0.00430244	45.3333	63	0	0.80871	0.0415992
G22P1	62	G22P1	2.47233	0.135907	0.404476	FALSE	0	0	6	225482	0.00190033	62.871	62	0	0.815958	0.0511979
IKBKB	62	IKBKB	2.46304	0.182443	0.406003	FALSE	0	0	5	193366	0.00142846	64.5	62	0	0.81712	0.0521002
VIM	62	VIM	2.47145	0.0629297	0.404621	FALSE	0	0	5	348560	0.00421745	48.1935	62	0	0.816069	0.0399941
TUBB	62	1	TUBB	2.45728	0.16129	0.406954	FALSE	0	0	5	298014	0.00293611	64.7581	62	0	0.81784	0.0516567
SRRM2	62	SRRM2	2.64276	0.0687467	0.378392	FALSE	0	0	5	230064	0.0027206	36.4194	62	0	0.794655	0.0412471
SUMO2	62	SUMO2	2.63701	0.0772078	0.379218	FALSE	0	0	5	214744	0.00259159	41.2097	62	0	0.795374	0.0456452
NCK1	62	NCK1	2.6981	0.085669	0.370632	FALSE	0	0	5	184932	0.0018368	32.5161	62	0	0.787738	0.0414894
HDAC4	61	HDAC4	2.52988	0.130601	0.395276	FALSE	0	0	6	293010	0.00300207	59.2459	61	0	0.808765	0.0520038
POLR2A	61	POLR2A	2.48561	0.0961749	0.402315	FALSE	0	0	5	319790	0.00390211	52.6721	61	0	0.814298	0.0444886
MAPK14	61	MAPK14	2.54228	0.0961749	0.393348	FALSE	0	0	5	268786	0.00313398	48.082	61	0	0.807216	0.0444033
JAK2	61	JAK2	2.5259	0.197268	0.395899	FALSE	0	0	5	315360	0.00322932	57.9836	61	0	0.809263	0.051942
FLNA	61	FLNA	2.46082	0.0688525	0.406368	FALSE	0	0	5	574482	0.00734225	54.8689	61	0	0.817397	0.0449876
MAGED1	61	1	2	MAGED1	2.73528	0.0147541	0.365593	FALSE	0	0	6	594594	0.00844158	21.1148	61	0	0.78309	0.0284228
CDK1	60	CDK1	2.56529	0.0751412	0.389819	FALSE	0	0	5	246506	0.00291342	45.5833	60	0	0.804338	0.0438182
GC20	59	GC20	2.70164	0.0426651	0.370146	FALSE	0	0	6	274552	0.00321179	29.1356	59	0	0.787295	0.0369033
RAE1	59	1	2	RAE1	2.74281	0.0233781	0.36459	FALSE	0	0	6	758342	0.00993447	20.4915	59	0	0.782149	0.0277434
RUNX1	59	1	2	RUNX1	2.55113	0.154296	0.391983	FALSE	0	0	6	376060	0.00469813	58.1186	59	0	0.806109	0.0534562
DAXX	58	DAXX	2.52722	0.0937689	0.395691	FALSE	0	0	5	260176	0.00279043	53.931	58	0	0.809097	0.0492882
SYK	58	SYK	2.51217	0.198427	0.398062	FALSE	0	0	5	316846	0.00303712	61.6207	58	0	0.810978	0.0547253
HSPA4	58	HSPA4	2.43913	0.118572	0.409982	FALSE	0	0	5	298878	0.00326009	64.9483	58	0	0.820108	0.0504237
PREI3	58	1	2	PREI3	2.76317	0.131881	0.361903	FALSE	0	0	6	307036	0.00485436	25.3103	58	0	0.779604	0.0392585
ERBB2	58	ERBB2	2.51704	0.186933	0.397292	FALSE	0	0	5	262216	0.00244195	62.4655	58	0	0.81037	0.0557918
PIN1	58	PIN1	2.42275	0.091954	0.412754	FALSE	0	0	5	379678	0.00435908	64.7069	58	0	0.822156	0.0493796
HSPCB	57	HSPCB	2.48871	0.130952	0.401814	FALSE	0	0	5	195128	0.00190228	57.1404	57	0	0.813911	0.047962
CDKN1A	57	CDKN1A	2.49181	0.137218	0.401315	FALSE	0	0	5	261092	0.00262871	64.1754	57	0	0.813524	0.0540197
EPB41	57	EPB41	2.61045	0.0288221	0.383076	FALSE	0	0	6	325146	0.00471773	33.5614	57	0	0.798694	0.0356142
HIF1A	57	HIF1A	2.45463	0.16604	0.407394	FALSE	0	0	6	302716	0.00342412	72.9649	57	0	0.818172	0.0578169
PPARBP	56	PPARBP	2.68482	0.14026	0.372465	FALSE	0	0	6	167034	0.00167573	47.0179	56	0	0.789398	0.0556661
PRKCZ	56	PRKCZ	2.54847	0.12013	0.392392	FALSE	0	0	5	233012	0.0022753	55.9821	56	0	0.806441	0.0513905
PLK1	56	PLK1	2.51217	0.141558	0.398062	FALSE	0	0	5	246480	0.00321837	51.1429	56	0	0.810978	0.0451244
FLJ20257	56	FLJ20257	2.68083	0.0616883	0.373018	FALSE	0	0	5	261990	0.00330078	31.8214	56	0	0.789896	0.0384449
SIRT1	56	SIRT1	2.61089	0.103247	0.383011	FALSE	0	0	5	177890	0.00190983	48.9107	56	0	0.798639	0.0509115
PRKAB1	56	1	PRKAB1	2.65339	0.024026	0.376877	FALSE	0	0	5	281114	0.00356225	29.625	56	0	0.793327	0.0345785
NCOA6	55	NCOA6	2.61443	0.189226	0.382492	FALSE	0	0	5	157512	0.00137344	63.3091	55	0	0.798196	0.0651437
XRCC5	55	XRCC5	2.57193	0.149495	0.388812	FALSE	0	0	6	141768	0.00125206	52.2	55	0	0.803508	0.0501266
RBBP4	55	1	RBBP4	2.62771	0.163636	0.380559	FALSE	0	0	6	160520	0.00139948	52.7455	55	0	0.796536	0.0551928
GNB2L1	55	GNB2L1	2.47942	0.0922559	0.403321	FALSE	0	0	5	323798	0.00356345	56.8	55	0	0.815073	0.0472818
VDR	55	VDR	2.57902	0.157576	0.387745	FALSE	0	0	5	158820	0.00145326	59.2	55	0	0.802623	0.0563273
MAP3K14	55	MAP3K14	2.65427	0.111111	0.376751	FALSE	0	0	5	122604	0.00133219	41.6182	55	0	0.793216	0.0481407
CSNK2A2	55	CSNK2A2	2.49137	0.112458	0.401386	FALSE	0	0	5	283188	0.00302965	55.3273	55	0	0.813579	0.0466503
APP	54	APP	2.50598	0.067086	0.399046	FALSE	0	0	5	659396	0.0100237	46.037	54	0	0.811753	0.0405769
MCM3	54	MCM3	2.68747	0.104822	0.372097	FALSE	0	0	6	203700	0.00247988	36.6481	54	0	0.789066	0.0444715
RIF1	54	RIF1	2.63834	0.0342418	0.379027	FALSE	0	0	5	251396	0.00317046	33.2222	54	0	0.795208	0.0371627
IRS1	54	IRS1	2.46702	0.180992	0.405347	FALSE	0	0	5	270020	0.00239116	71.2778	54	0	0.816622	0.0578253
CHUK	54	CHUK	2.50243	0.209644	0.399611	FALSE	0	0	5	181860	0.00128828	69.8704	54	0	0.812196	0.0592624
DHX9	54	DHX9	2.49712	0.152341	0.400461	FALSE	0	0	6	267928	0.00281405	57.6481	54	0	0.81286	0.0485254
STUB1	54	STUB1	2.47278	0.194969	0.404404	FALSE	0	0	5	225334	0.00151879	73.6296	54	0	0.815903	0.0598129
SGK	54	1	2	SGK	2.64409	0.0244584	0.378202	FALSE	0	0	6	391744	0.00596566	29.8889	54	0	0.794489	0.0335107
HTATIP	54	HTATIP	2.59495	0.0971349	0.385363	FALSE	0	0	5	200902	0.00219266	52.8148	54	0	0.800631	0.052319
SFN	54	1	SFN	2.49668	0.100629	0.400532	FALSE	0	0	5	326272	0.00455224	53.8148	54	0	0.812915	0.0456276
SRRM1	53	SRRM1	2.74059	0.115385	0.364885	FALSE	0	0	6	163516	0.00208706	29.5094	53	0	0.782426	0.0423239
RNPS1	53	1	RNPS1	2.74059	0.129173	0.364885	FALSE	0	0	6	201726	0.00253218	33.8113	53	0	0.782426	0.0460728
SMURF1	52	SMURF1	2.59185	0.134238	0.385824	FALSE	0	0	5	171480	0.00185701	47.2115	52	0	0.801018	0.0474772
TERF1	52	TERF1	2.50642	0.0708899	0.398976	FALSE	0	0	5	273868	0.00327049	47.7308	52	0	0.811698	0.0413112
CDK9	52	CDK9	2.63922	0.0791855	0.3789	FALSE	0	0	5	226326	0.0026399	44.2885	52	0	0.795097	0.0476625
ESR2	52	ESR2	2.53165	0.162896	0.394999	FALSE	0	0	5	162174	0.00134583	63.8077	52	0	0.808544	0.0580248
ATM	52	1	ATM	2.63258	0.113876	0.379855	FALSE	0	0	6	125332	0.00132375	43.5769	52	0	0.795927	0.0475101
MAPK8	52	MAPK8	2.5228	0.12368	0.396385	FALSE	0	0	6	200466	0.00187981	62.1923	52	0	0.80965	0.054205
CASP8	52	CASP8	2.61266	0.0731523	0.382752	FALSE	0	0	5	230114	0.00302096	41.2692	52	0	0.798417	0.0436933
THRB	51	THRB	2.69633	0.145098	0.370875	FALSE	0	0	6	151700	0.00139263	46.6863	51	0	0.787959	0.0563607
NEK6	51	1	2	NEK6	2.83355	0.0172549	0.352914	FALSE	0	0	6	428334	0.00517058	21.4314	51	0	0.770806	0.0363171
TRIM28	51	1	TRIM28	2.4772	0.12	0.403681	FALSE	0	0	6	239200	0.00225652	69.3922	51	0	0.81535	0.0569546
CDC42	50	CDC42	2.54582	0.075102	0.392801	FALSE	0	0	5	289680	0.00350662	48.28	50	0	0.806773	0.0451782
RBBP7	50	RBBP7	2.75432	0.177143	0.363067	FALSE	0	0	6	117494	0.00105869	45.96	50	0	0.78071	0.0611718
PAK1	50	PAK1	2.48517	0.110204	0.402387	FALSE	0	0	5	310494	0.00325595	65.24	50	0	0.814354	0.0532516
NFKB2	50	1	NFKB2	2.60823	0.208163	0.383401	FALSE	0	0	5	67338	0.00050893	56.66	50	0	0.798971	0.0577574
APC	50	APC	2.52988	0.0571429	0.395276	FALSE	0	0	6	220512	0.00283903	47.06	50	0	0.808765	0.0424253
HGS	50	HGS	2.55024	0.0579592	0.392119	FALSE	0	0	5	245292	0.00323638	46.26	50	0	0.80622	0.044316
ACTG1	50	ACTG1	2.69146	0.0685714	0.371546	FALSE	0	0	6	235668	0.0031754	36.56	50	0	0.788568	0.045826
ZBTB16	49	ZBTB16	2.55467	0.147109	0.39144	FALSE	0	0	6	276456	0.00314206	63.6531	49	0	0.805666	0.059484
ARF6	49	ARF6	2.69854	0.0340136	0.370571	FALSE	0	0	6	212176	0.00289665	29.8163	49	0	0.787683	0.0386526
SMURF2	49	SMURF2	2.57946	0.0935374	0.387678	FALSE	0	0	5	274500	0.00371263	42.9388	49	0	0.802568	0.0417105
PSMC5	49	PSMC5	2.56574	0.156463	0.389752	FALSE	0	0	6	249008	0.002841	53.1837	49	0	0.804283	0.0498143
VAV1	49	VAV1	2.65073	0.213435	0.377255	FALSE	0	0	5	124998	0.00114503	55.1837	49	0	0.793659	0.0619116
CREB1	49	CREB1	2.59672	0.131803	0.385101	FALSE	0	0	5	159416	0.00170248	58.7143	49	0	0.800409	0.0584369
TERF2	49	TERF2	2.7251	0.0552721	0.366959	FALSE	0	0	5	185214	0.00228	31.3061	49	0	0.784363	0.0417179
CAV1	49	CAV1	2.56972	0.129252	0.389147	FALSE	0	0	5	240184	0.00271813	56.5102	49	0	0.803785	0.0537804
HSP90AA1	48	HSP90AA1	2.50775	0.158688	0.398764	FALSE	0	0	5	174236	0.00158659	69.4792	48	0	0.811532	0.0592115
THRA	48	THRA	2.58433	0.200355	0.386948	FALSE	0	0	6	96584	0.00068622	63.7917	48	0	0.801959	0.0620542
E2F1	47	E2F1	2.54936	0.157262	0.392256	FALSE	0	0	6	125574	0.00118535	67.1702	47	0	0.80633	0.0611363
ATXN1	47	ATXN1	2.64276	0.0453284	0.378392	FALSE	0	0	5	252946	0.00390959	35.8085	47	0	0.794655	0.040165
MEN1	47	1	2	MEN1	2.56618	0.12951	0.389684	FALSE	0	0	5	298086	0.00375262	60.4255	47	0	0.804228	0.0567777
COPS5	47	1	COPS5	2.57857	0.107308	0.387811	FALSE	0	0	6	224690	0.00296136	49.9787	47	0	0.802678	0.0492599
HSPA5	47	HSPA5	2.49137	0.102683	0.401386	FALSE	0	0	5	247240	0.002928	65.4468	47	0	0.813579	0.0548722
HDAC5	47	HDAC5	2.54803	0.140611	0.39246	FALSE	0	0	5	174700	0.00175532	60.9362	47	0	0.806496	0.055795
HSPA1A	46	HSPA1A	2.46879	0.136232	0.405056	FALSE	0	0	5	182938	0.00168304	73.4565	46	0	0.816401	0.0589663
MYOD1	46	MYOD1	2.53962	0.189372	0.39376	FALSE	0	0	6	199048	0.00207347	71.2391	46	0	0.807548	0.0646256
HIST1H4A	46	HIST1H4A	2.6919	0.116908	0.371485	FALSE	0	0	5	109128	0.00101763	49.587	46	0	0.788513	0.0614683
RAC1	46	1	RAC1	2.53564	0.0879227	0.394378	FALSE	0	0	5	219692	0.00239611	53.7174	46	0	0.808046	0.0490672
CHM	46	1	CHM	3.05622	0.0183575	0.327202	FALSE	0	0	6	235868	0.00256356	10.2609	46	0	0.742973	0.0355731
YWHAH	46	YWHAH	2.66755	0.116908	0.374876	FALSE	0	0	5	295596	0.00360793	49.2391	46	0	0.791556	0.0571949
CDK4	45	CDK4	2.66313	0.0979798	0.375499	FALSE	0	0	6	153886	0.0018147	44.3333	45	0	0.792109	0.0507064
CDH1	45	CDH1	2.51793	0.110101	0.397152	FALSE	0	0	5	196238	0.00200678	63.5333	45	0	0.810259	0.056465
BCL2	45	BCL2	2.55024	0.114141	0.392119	FALSE	0	0	5	223294	0.00289986	55.3333	45	0	0.80622	0.0510721
TSC22D1	45	1	TSC22D1	2.88358	0.0272727	0.346792	FALSE	0	0	5	148918	0.00192026	21.9778	45	0	0.764553	0.0415272
PPP1CA	45	PPP1CA	2.57548	0.0959596	0.388278	FALSE	0	0	5	175000	0.00186009	54.6	45	0	0.803066	0.0518589
RUNX2	45	1	2	RUNX2	2.556	0.164646	0.391237	FALSE	0	0	6	169444	0.00164965	68.3333	45	0	0.8055	0.06182
JAK1	44	JAK1	2.72554	0.22093	0.366899	FALSE	0	0	5	89134	0.00078009	49.1364	44	0	0.784307	0.0634837
ITGB4BP	44	ITGB4BP	2.76627	0.0549683	0.361498	FALSE	0	0	6	120532	0.00163794	28.1591	44	0	0.779216	0.0410493
XPO1	44	XPO1	2.55246	0.0887949	0.391779	FALSE	0	0	6	205114	0.00258304	56.6591	44	0	0.805943	0.0526282
ARRB1	44	ARRB1	2.60912	0.109937	0.383271	FALSE	0	0	5	154854	0.00158661	48.7273	44	0	0.79886	0.050471
CHD3	44	CHD3	2.69101	0.121564	0.371607	FALSE	0	0	6	111400	0.00127105	47.8636	44	0	0.788623	0.0559011
CEBPA	43	CEBPA	2.57326	0.259136	0.388612	FALSE	0	0	6	100784	0.00077746	74.5349	43	0	0.803342	0.0708285
MCM2	43	1	MCM2	2.87694	0.152824	0.347592	FALSE	0	0	6	72040	0.00092594	30.8837	43	0	0.765383	0.0532711
FANCA	43	FANCA	2.67286	0.121816	0.374131	FALSE	0	0	5	378436	0.00437797	48.1628	43	0	0.790892	0.0574032
FN1	43	FN1	2.79283	0.055371	0.35806	FALSE	0	0	5	555528	0.00855692	23.9302	43	0	0.775896	0.0381845
CDC37	43	CDC37	2.53209	0.122924	0.39493	FALSE	0	0	5	254924	0.00293359	62.6512	43	0	0.808488	0.0568499
ARRB2	43	ARRB2	2.53386	0.133998	0.394654	FALSE	0	0	5	193616	0.00209158	59	43	0	0.808267	0.0531801
SET	43	SET	2.5529	0.0841639	0.391711	FALSE	0	0	5	211822	0.00245649	58.7674	43	0	0.805888	0.0541277
NEDD4	43	NEDD4	2.61355	0.0852713	0.382622	FALSE	0	0	5	198580	0.00250248	45.6047	43	0	0.798307	0.0476052
CCND1	42	CCND1	2.54095	0.210221	0.393554	FALSE	0	0	6	179494	0.00204048	77.7143	42	0	0.807382	0.0693046
SQSTM1	42	SQSTM1	2.5622	0.105691	0.39029	FALSE	0	0	5	235486	0.00320194	56.0238	42	0	0.804726	0.0534974
SF3A2	42	SF3A2	2.8672	0.113821	0.348773	FALSE	0	0	6	132006	0.00166692	27.5714	42	0	0.7666	0.0514535
DDB1	42	1	DDB1	2.57725	0.11266	0.388011	FALSE	0	0	6	175778	0.00203697	54.4286	42	0	0.802844	0.0521662
PRKCB	42	PRKCB	2.77247	0.0313589	0.36069	FALSE	0	0	6	123138	0.00153065	29.7381	42	0	0.778442	0.0433699
STAT5A	42	STAT5A	2.66401	0.269454	0.375374	FALSE	0	0	5	95724	0.00069671	65.7143	42	0	0.791999	0.0746753
ETS1	41	ETS1	2.55069	0.197561	0.392051	FALSE	0	0	6	109944	0.00100137	71.4146	41	0	0.806164	0.0647237
MLH1	41	MLH1	2.6193	0.0487805	0.381781	FALSE	0	0	5	214904	0.00304236	41.5366	41	0	0.797587	0.0437057
ATR	41	ATR	2.67021	0.118293	0.374503	FALSE	0	0	6	101718	0.00100469	49.3415	41	0	0.791224	0.0577483
TNFRSF1B	41	1	TNFRSF1B	2.64365	0.0463415	0.378265	FALSE	0	0	5	167314	0.00190037	43.1463	41	0	0.794544	0.0489752
NCOA2	41	1	NCOA2	2.66578	0.240244	0.375125	FALSE	0	0	6	122884	0.00123166	67.1951	41	0	0.791777	0.0757859
HNRPM	41	HNRPM	2.64852	0.146341	0.37757	FALSE	0	0	6	148776	0.00155148	50.439	41	0	0.793935	0.054686
TLE1	41	TLE1	2.78442	0.054878	0.359141	FALSE	0	0	6	229518	0.00282301	30	41	0	0.776948	0.0457364
ATN1	41	1	ATN1	2.83887	0.0329268	0.352253	FALSE	0	0	6	155808	0.00261334	21.1707	41	0	0.770142	0.038942
SKB1	41	SKB1	2.76405	0.0719512	0.361787	FALSE	0	0	6	148488	0.00165587	38.3659	41	0	0.779493	0.0542121
NCL	41	NCL	2.48207	0.134146	0.402889	FALSE	0	0	5	161916	0.00167597	74.3902	41	0	0.814741	0.0608757
DNCL1	41	DNCL1	2.70606	0.187805	0.36954	FALSE	0	0	5	151480	0.00205768	40.1707	41	0	0.786742	0.0514766
BCR	40	1	BCR	2.6286	0.170513	0.380431	FALSE	0	0	5	186390	0.00185055	63.6	40	0	0.796425	0.0666579
COPS6	40	1	COPS6	2.74015	0.0923077	0.364943	FALSE	0	0	6	206516	0.00283282	34.975	40	0	0.782481	0.0472147
AIRE	40	AIRE	2.66135	0.10641	0.375748	FALSE	0	0	5	124964	0.00109644	58.875	40	0	0.792331	0.0663191
PSMC2	40	1	2	PSMC2	2.70606	0.233333	0.36954	FALSE	0	0	6	156470	0.00190233	46.575	40	0	0.786742	0.0582497
INSR	40	INSR	2.56308	0.273077	0.390155	FALSE	0	0	5	121078	0.0008425	73.7	40	0	0.804615	0.0696361
MGMT	40	1	MGMT	2.53652	0.142308	0.394241	FALSE	0	0	6	133984	0.0014023	71.425	40	0	0.807935	0.0638541
PARK2	40	PARK2	2.59318	0.1	0.385626	FALSE	0	0	5	147744	0.00182095	52.575	40	0	0.800852	0.0534659
YY1	40	YY1	2.65206	0.217949	0.377066	FALSE	0	0	6	79938	0.00068889	71.45	40	0	0.793493	0.077805
PTK2B	40	PTK2B	2.75741	0.237179	0.362659	FALSE	0	0	5	135796	0.00157675	54.875	40	0	0.780323	0.0760402
PSMA1	40	PSMA1	2.66445	0.166667	0.375312	FALSE	0	0	5	148408	0.00184513	45.85	40	0	0.791943	0.0528324
KPNA2	39	KPNA2	2.58212	0.105263	0.387279	FALSE	0	0	6	131912	0.00140427	61.9744	39	0	0.802235	0.0596148
HNRPA1	39	HNRPA1	2.6255	0.197031	0.38088	FALSE	0	0	6	167444	0.00199566	52.9487	39	0	0.796813	0.0554793
CHEK1	39	CHEK1	2.5622	0.182186	0.39029	FALSE	0	0	5	85110	0.00077455	70.7436	39	0	0.804726	0.0661534
PAK2	39	1	PAK2	2.54139	0.097166	0.393485	FALSE	0	0	5	208770	0.0023468	67.641	39	0	0.807326	0.0619011
PSMD4	39	1	PSMD4	2.67508	0.252362	0.373821	FALSE	0	0	6	105696	0.00151639	46.3077	39	0	0.790615	0.0557669
TUBB4	39	1	TUBB4	2.59495	0.287449	0.385363	FALSE	0	0	5	104732	0.00098424	64.2051	39	0	0.800631	0.0641154
BTRC	39	BTRC	2.56485	0.167341	0.389886	FALSE	0	0	6	126284	0.00101478	71.4359	39	0	0.804394	0.0674955
TBK1	39	TBK1	2.64586	0.182186	0.377949	FALSE	0	0	5	62536	0.00059732	55.8462	39	0	0.794267	0.0618284
KRT18	39	KRT18	2.52103	0.126856	0.396664	FALSE	0	0	5	234112	0.00284075	65.5128	39	0	0.809872	0.0584313
CDC5L	38	CDC5L	2.77069	0.0910384	0.36092	FALSE	0	0	5	101726	0.00120884	40.0263	38	0	0.778663	0.0555596
VCP	38	VCP	2.60248	0.0810811	0.384249	FALSE	0	0	6	196286	0.00204059	57.6316	38	0	0.79969	0.0586858
TOP2A	38	1	2	TOP2A	2.53608	0.174964	0.39431	FALSE	0	0	6	156686	0.00191143	76.3421	38	0	0.80799	0.0678732
SMARCC1	38	1	SMARCC1	2.57193	0.216216	0.388812	FALSE	0	0	5	86884	0.00065282	69.6053	38	0	0.803508	0.0665827
RBL1	38	1	RBL1	2.66224	0.182077	0.375624	FALSE	0	0	6	164092	0.00182293	59.3947	38	0	0.79222	0.0673445
PRKCE	38	PRKCE	2.69765	0.0981508	0.370692	FALSE	0	0	5	158520	0.00179087	44.7632	38	0	0.787793	0.0551332
XRCC6	38	1	XRCC6	2.63789	0.116643	0.37909	FALSE	0	0	6	74800	0.0006293	54	38	0	0.795263	0.0587022
DISC1	38	1	DISC1	2.78132	0.056899	0.359542	FALSE	0	0	5	203524	0.0029912	30.1053	38	0	0.777335	0.0463913
NFKBIB	38	NFKBIB	2.70651	0.174964	0.36948	FALSE	0	0	5	87420	0.00091623	50.4474	38	0	0.786687	0.0634831
p44S10	37	p44S10	2.7012	0.313814	0.370206	FALSE	0	0	6	98692	0.00105369	47.5676	37	0	0.787351	0.0582605
NRIP1	37	NRIP1	2.77556	0.127628	0.360287	FALSE	0	0	6	90878	0.00080476	55.5405	37	0	0.778054	0.0778925
TNIK	37	TNIK	2.80611	0.021021	0.356365	FALSE	0	0	5	118874	0.00149642	29.1892	37	0	0.774236	0.0471412
PPP2CB	37	1	PPP2CB	2.81939	0.204204	0.354687	FALSE	0	0	6	91230	0.0009012	37.0811	37	0	0.772576	0.0621986
MAPT	37	MAPT	2.51881	0.165165	0.397012	FALSE	0	0	5	96460	0.00073737	75.4054	37	0	0.810148	0.0665759
HIST4H4	37	HIST4H4	2.7012	0.133634	0.370206	FALSE	0	0	6	74550	0.00062238	56.6216	37	0	0.787351	0.0704453
ATF2	37	ATF2	2.72156	0.264264	0.367437	FALSE	0	0	6	63504	0.00046916	60.5405	37	0	0.784805	0.0727876
GH1	37	GH1	2.76715	0.0285285	0.361382	FALSE	0	0	6	86032	0.00085701	33.7297	37	0	0.779106	0.0482569
SMC1L1	37	SMC1L1	2.80655	0.145646	0.356309	FALSE	0	0	6	109086	0.0014675	37.8378	37	0	0.774181	0.0562291
RPS6KB1	36	RPS6KB1	2.5259	0.144444	0.395899	FALSE	0	0	5	136966	0.00121864	71.9722	36	0	0.809263	0.0632512
FTSJ1	36	FTSJ1	2.83577	0.0539683	0.352638	FALSE	0	0	6	64506	0.00069329	29.8889	36	0	0.770529	0.0522242
EEF1G	36	EEF1G	2.61709	0.0634921	0.382104	FALSE	0	0	5	105738	0.0013332	46.1111	36	0	0.797864	0.049287
HDAC6	36	HDAC6	2.56042	0.12381	0.39056	FALSE	0	0	5	138206	0.00150291	65	36	0	0.804947	0.0606746
SRF	36	SRF	2.74679	0.161905	0.364061	FALSE	0	0	6	96370	0.00108934	52.7778	36	0	0.781651	0.0687554
CLTC	36	CLTC	2.59318	0.120635	0.385626	FALSE	0	0	6	107436	0.00126374	66.5556	36	0	0.800852	0.0658416
EEF1D	36	EEF1D	2.65427	0.0634921	0.376751	FALSE	0	0	5	132544	0.00153924	48.6111	36	0	0.793216	0.0547395
TADA2L	36	TADA2L	2.6981	0.111111	0.370632	FALSE	0	0	6	92478	0.00108593	50.8056	36	0	0.787738	0.0611513
DCTN1	36	1	DCTN1	2.55378	0.246032	0.391576	FALSE	0	0	5	118022	0.00139363	61.1667	36	0	0.805777	0.0576822
SETDB1	36	1	SETDB1	2.71138	0.0904762	0.368816	FALSE	0	0	5	99848	0.0012885	43.9167	36	0	0.786078	0.0543493
USP7	36	USP7	2.71138	0.0476191	0.368816	FALSE	0	0	6	199200	0.00287219	38.6944	36	0	0.786078	0.0483305
MCM5	35	MCM5	2.66888	0.173109	0.374689	FALSE	0	0	6	104856	0.00112316	50.4571	35	0	0.79139	0.0564702
SPTAN1	35	SPTAN1	2.66711	0.0857143	0.374938	FALSE	0	0	6	175542	0.00243677	48	35	0	0.791611	0.0554233
DIPA	35	DIPA	2.90173	0.0285714	0.344622	FALSE	0	0	6	221988	0.0025011	19.9143	35	0	0.762284	0.0424205
ILK	35	ILK	2.86808	0.0134454	0.348665	FALSE	0	0	5	159360	0.00225308	22.2286	35	0	0.76649	0.0459707
MLL	35	MLL	2.75166	0.119328	0.363417	FALSE	0	0	5	93552	0.0010926	44.5429	35	0	0.781042	0.060651
UBQLN4	35	UBQLN4	2.62284	0.0571429	0.381266	FALSE	0	0	6	212792	0.00353809	44	35	0	0.797145	0.0467115
GTF2B	35	GTF2B	2.7676	0.221849	0.361324	FALSE	0	0	6	70416	0.00067299	55	35	0	0.77905	0.075471
NDRG1	35	NDRG1	2.77335	0.0403361	0.360575	FALSE	0	0	6	130936	0.00170663	37.4286	35	0	0.778331	0.0541728
NR0B2	35	NR0B2	2.67995	0.201681	0.373142	FALSE	0	0	6	78496	0.0007623	63	35	0	0.790007	0.0725984
MAP3K5	34	MAP3K5	2.583	0.12656	0.387147	FALSE	0	0	5	119840	0.00143654	68.3235	34	0	0.802125	0.0664775
STAT5B	34	STAT5B	2.73927	0.30303	0.365061	FALSE	0	0	5	58506	0.00042292	59.4118	34	0	0.782592	0.0786911
MYH9	34	MYH9	2.68349	0.083779	0.372649	FALSE	0	0	5	187890	0.00252079	48.9118	34	0	0.789564	0.0573719
CHAF1A	34	CHAF1A	2.73528	0.108734	0.365593	FALSE	0	0	5	117876	0.00132249	53.2941	34	0	0.78309	0.0677033
DNCH1	34	DNCH1	2.63435	0.290553	0.3796	FALSE	0	0	5	97174	0.00082322	58.8824	34	0	0.795706	0.0638373
GCN5L2	34	GCN5L2	2.65516	0.14082	0.376626	FALSE	0	0	6	122898	0.00141876	63.4706	34	0	0.793105	0.0696628
SKIL	34	SKIL	2.6224	0.131907	0.38133	FALSE	0	0	6	135192	0.00152161	60.6176	34	0	0.7972	0.0636532
MYB	34	MYB	2.61709	0.153298	0.382104	FALSE	0	0	5	83894	0.0008673	65.2647	34	0	0.797864	0.0669851
STRN	34	1	STRN	2.88402	0.376114	0.346738	FALSE	0	0	6	81520	0.0008037	34.0882	34	0	0.764498	0.066782
DDX20	34	DDX20	2.85923	0.146168	0.349745	FALSE	0	0	6	96920	0.00119317	35.7353	34	0	0.767596	0.0630401
ACTN1	34	ACTN1	2.77955	0.0374332	0.359771	FALSE	0	0	6	139658	0.00189448	32.8529	34	0	0.777556	0.0495285
PSMD2	34	PSMD2	2.63656	0.249554	0.379281	FALSE	0	0	6	132086	0.0012175	60.0882	34	0	0.795429	0.0642515
BTK	34	BTK	2.7313	0.172906	0.366126	FALSE	0	0	5	111824	0.00136619	52.3529	34	0	0.783588	0.0712454
PCBP1	34	PCBP1	2.74325	0.196078	0.364531	FALSE	0	0	6	88996	0.00098825	45.2059	34	0	0.782094	0.0633262
HDAC7A	34	HDAC7A	2.68659	0.215686	0.372219	FALSE	0	0	6	82150	0.0008207	66.1471	34	0	0.789177	0.0769152
ING1	33	ING1	2.57238	0.236742	0.388745	FALSE	0	0	6	76118	0.00056896	89.7273	33	0	0.803453	0.0848886
TSG101	33	TSG101	2.63347	0.0909091	0.379728	FALSE	0	0	6	148686	0.00194991	57.5758	33	0	0.795817	0.0617842
MCM6	33	MCM6	2.90925	0.183712	0.343731	FALSE	0	0	6	37052	0.00041363	34.9697	33	0	0.761344	0.0666898
IGF1R	33	IGF1R	2.55246	0.308712	0.391779	FALSE	0	0	5	102444	0.00086571	84.0909	33	0	0.805943	0.0779783
NOTCH1	33	NOTCH1	2.63214	0.128788	0.379919	FALSE	0	0	5	87884	0.00101079	65.6061	33	0	0.795983	0.0703707
PTP4A3	33	1	PTP4A3	2.9699	0.00568182	0.336712	FALSE	0	0	6	119432	0.00124333	21.6061	33	0	0.753763	0.0544023
PDGFRB	33	PDGFRB	2.6286	0.272727	0.380431	FALSE	0	0	5	90456	0.00080654	73.2424	33	0	0.796425	0.0787227
GAPD	33	GAPD	2.57061	0.094697	0.389013	FALSE	0	0	5	119734	0.00134508	64.1818	33	0	0.803674	0.0618968
PDPK1	33	PDPK1	2.75122	0.0909091	0.363475	FALSE	0	0	5	84934	0.00106271	43.8182	33	0	0.781098	0.0597758
KAT5	33	KAT5	2.6556	0.140152	0.376563	FALSE	0	0	5	102296	0.00106938	65.8788	33	0	0.79305	0.074452
CSK	33	1	CSK	2.76007	0.166667	0.36231	FALSE	0	0	5	90826	0.00089225	49.4242	33	0	0.779991	0.0700193
PHB2	33	PHB2	2.6649	0.0719697	0.375249	FALSE	0	0	5	137450	0.00175312	54.2424	33	0	0.791888	0.0624628
KHDRBS1	33	KHDRBS1	2.67596	0.176136	0.373697	FALSE	0	0	5	90120	0.00080837	67.7879	33	0	0.790505	0.0795143
SMAD9	32	SMAD9	2.79814	0.0362903	0.35738	FALSE	0	0	6	160748	0.00216362	34.4688	32	0	0.775232	0.0549778
MAP2K1	32	MAP2K1	2.73351	0.125	0.36583	FALSE	0	0	6	109542	0.00130039	45.6875	32	0	0.783311	0.0603448
ANXA2	32	1	ANXA2	2.63214	0.0907258	0.379919	FALSE	0	0	5	102960	0.00083679	65.0938	32	0	0.795983	0.0692226
C1orf103	32	C1orf103	2.92165	0.0100807	0.342273	FALSE	0	0	5	78458	0.00090565	21.2188	32	0	0.759794	0.0508884
SFPQ	32	SFPQ	2.63966	0.135081	0.378836	FALSE	0	0	5	79052	0.00078306	66.75	32	0	0.795042	0.0712473
HD	32	HD	2.54095	0.118952	0.393554	FALSE	0	0	5	138654	0.00139687	71.3125	32	0	0.807382	0.0650732
FNBP3	32	FNBP3	2.87649	0.0625	0.347645	FALSE	0	0	5	136138	0.00160196	27.1875	32	0	0.765438	0.0562631
H3F3A	32	1	H3F3A	2.89464	0.147177	0.345466	FALSE	0	0	6	41582	0.00036742	45	32	0	0.76317	0.0823031
GABARAPL2	32	GABARAPL2	2.84772	0.0826613	0.351158	FALSE	0	0	5	143172	0.0020208	27.1875	32	0	0.769035	0.0514074
BCL3	32	BCL3	2.55467	0.221774	0.39144	FALSE	0	0	6	64920	0.00042295	87.375	32	0	0.805666	0.0794757
HIST1H3E	32	HIST1H3E	2.90084	0.179435	0.344728	FALSE	0	0	5	33448	0.000315	36.3125	32	0	0.762395	0.0721297
HMGB1	32	HMGB1	2.61443	0.137097	0.382492	FALSE	0	0	6	115708	0.00111248	69	32	0	0.798196	0.0707626
STRN3	32	STRN3	3.03586	0.423387	0.329396	FALSE	0	0	6	41660	0.00030365	28.4062	32	0	0.745518	0.0857251
POU2F1	32	POU2F1	2.77291	0.22379	0.360632	FALSE	0	0	6	46484	0.00045263	64.0938	32	0	0.778386	0.0879121
PSMA3	32	PSMA3	2.66313	0.177419	0.375499	FALSE	0	0	6	82322	0.00090025	56.25	32	0	0.792109	0.0631679
CCDC85B	32	CCDC85B	2.95086	0.0282258	0.338884	FALSE	0	0	6	196810	0.00202992	18.5625	32	0	0.756142	0.0473658
SNRPB	32	SNRPB	3.01151	0.217742	0.332059	FALSE	0	0	6	51942	0.00059605	24.8438	32	0	0.748561	0.0687327
RPA2	32	RPA2	2.80655	0.0524194	0.356309	FALSE	0	0	6	106332	0.00130784	39.7812	32	0	0.774181	0.0599791
COL2A1	31	1	2	COL2A1	3.36299	0.0473118	0.297354	FALSE	0	0	6	376394	0.00564153	7.35484	31	0	0.704626	0.0516129
PHLDA3	31	PHLDA3	3.09385	0.00860215	0.323222	FALSE	0	0	6	55432	0.00060522	16.6452	31	0	0.738269	0.0593404
ZAP70	31	ZAP70	2.68127	0.316129	0.372957	FALSE	0	0	5	87944	0.00079506	64.7097	31	0	0.789841	0.0776827
TAF9	31	TAF9	2.7251	0.124731	0.366959	FALSE	0	0	5	92156	0.00120089	53	31	0	0.784363	0.0690821
SOS1	31	SOS1	2.58566	0.333333	0.386749	FALSE	0	0	5	82484	0.00064684	81.7742	31	0	0.801793	0.0804229
KAT2B	31	KAT2B	2.75122	0.193548	0.363475	FALSE	0	0	6	47512	0.00040482	64.2581	31	0	0.781098	0.0849974
DNM2	31	DNM2	2.7127	0.113978	0.368636	FALSE	0	0	5	106160	0.00127488	51.4839	31	0	0.785912	0.0658395
PABPC1	31	PABPC1	2.65073	0.111828	0.377255	FALSE	0	0	6	92828	0.00089613	61.1613	31	0	0.793659	0.0673258
DLG4	31	DLG4	2.80965	0.0795699	0.355916	FALSE	0	0	5	223674	0.00298742	38.8387	31	0	0.773794	0.0618323
CHD4	31	CHD4	2.67641	0.219355	0.373635	FALSE	0	0	6	68662	0.00065354	65.7742	31	0	0.790449	0.0742592
GAB2	31	GAB2	2.72953	0.298925	0.366364	FALSE	0	0	5	63714	0.00040995	75.5806	31	0	0.783809	0.0971474
DVL2	31	DVL2	2.70164	0.0731183	0.370146	FALSE	0	0	5	118458	0.00160815	44.7742	31	0	0.787295	0.0560464
TCF3	31	TCF3	2.76848	0.204301	0.361209	FALSE	0	0	6	69318	0.00069595	59.8387	31	0	0.77894	0.0810823
FASLG	31	FASLG	2.60469	0.111828	0.383922	FALSE	0	0	5	122070	0.00125723	64.4839	31	0	0.799413	0.067892
MAX	31	MAX	2.77424	0.0967742	0.36046	FALSE	0	0	5	52294	0.00062461	47	31	0	0.77822	0.0656472
ITCH	31	ITCH	2.59628	0.0903226	0.385166	FALSE	0	0	5	65360	0.00063888	61.4839	31	0	0.800465	0.0616956
TCP1	31	TCP1	2.67198	0.31828	0.374254	FALSE	0	0	6	74472	0.00059932	61.2258	31	0	0.791003	0.0700155
IRS2	31	IRS2	2.60469	0.223656	0.383922	FALSE	0	0	5	118054	0.00090591	76.8065	31	0	0.799413	0.0778643
MAP3K7	31	MAP3K7	2.62107	0.189247	0.381523	FALSE	0	0	6	56260	0.00056922	68.0968	31	0	0.797366	0.0698814
PSMC1	31	PSMC1	2.73705	0.346237	0.365357	FALSE	0	0	6	65644	0.00053372	48.2903	31	0	0.782869	0.063165
HNRPL	31	HNRPL	2.64055	0.232258	0.378709	FALSE	0	0	6	84486	0.00086646	58.2903	31	0	0.794931	0.0631516
SUV39H1	30	SUV39H1	2.80611	0.275862	0.356365	FALSE	0	0	6	28802	0.00023887	63.5667	30	0	0.774236	0.0944032
AKAP9	30	AKAP9	2.82514	0.324138	0.353964	FALSE	0	0	5	43482	0.00060873	41.5	30	0	0.771857	0.0686567
TAL1	30	TAL1	2.66932	0.218391	0.374627	FALSE	0	0	6	44010	0.00035623	67	30	0	0.791335	0.0751121
RXRB	30	RXRB	2.9668	0.16092	0.337064	FALSE	0	0	6	30916	0.00040398	33.8333	30	0	0.75415	0.0799206
SKIIP	30	SKIIP	2.67463	0.167816	0.373883	FALSE	0	0	5	82364	0.0008609	68.1333	30	0	0.790671	0.0781992
EIF2C4	30	EIF2C4	2.88977	0.091954	0.346048	FALSE	0	0	5	114286	0.00137492	32.7333	30	0	0.763778	0.0665298
GTF2F1	30	GTF2F1	2.82337	0.158621	0.354186	FALSE	0	0	6	71482	0.000946	43.7333	30	0	0.772078	0.064928
MAPRE1	30	MAPRE1	2.74148	0.333333	0.364767	FALSE	0	0	5	48900	0.00052918	52.8333	30	0	0.782315	0.0736965
SIAH1	30	SIAH1	2.64807	0.0873563	0.377633	FALSE	0	0	6	120304	0.00139178	53.6	30	0	0.793991	0.0593704
ATF4	30	ATF4	2.69234	0.23908	0.371424	FALSE	0	0	6	86086	0.00092387	62.5	30	0	0.788457	0.0725126
HRAS	30	HRAS	2.82691	0.128736	0.353743	FALSE	0	0	5	71756	0.00080712	44.8667	30	0	0.771636	0.0742952
CBX5	30	CBX5	2.90084	0.190805	0.344728	FALSE	0	0	6	119952	0.00119219	42.3667	30	0	0.762395	0.0794486
SMARCB1	30	SMARCB1	2.66667	0.22069	0.375	FALSE	0	0	5	65260	0.00069613	68.2667	30	0	0.791667	0.0757778
BARD1	30	1	BARD1	2.63479	0.16092	0.379536	FALSE	0	0	6	82200	0.00098142	67.8667	30	0	0.795651	0.0704742
STK24	30	1	STK24	3.02612	0.416092	0.330456	FALSE	0	0	6	39342	0.00028067	28.6667	30	0	0.746735	0.0889927
KIT	30	KIT	2.64365	0.344828	0.378265	FALSE	0	0	5	100010	0.00082616	77.6333	30	0	0.794544	0.0858619
ITGB1	30	ITGB1	2.85038	0.0482759	0.350831	FALSE	0	0	6	177346	0.00267164	29.6333	30	0	0.768703	0.0535888
VIL2	29	1	VIL2	2.67906	0.0591133	0.373265	FALSE	0	0	5	189718	0.00211134	54.5172	29	0	0.790117	0.0643487
UNC119	29	UNC119	2.86366	0.0172414	0.349204	FALSE	0	0	5	98266	0.00122932	30.5862	29	0	0.767043	0.0586207
PPARA	29	PPARA	2.80478	0.172414	0.356534	FALSE	0	0	6	60708	0.00057587	58.6897	29	0	0.774402	0.0859292
JUND	29	JUND	2.62373	0.288177	0.381137	FALSE	0	0	6	69128	0.00053911	79.1034	29	0	0.797034	0.0806004
SMARCE1	29	SMARCE1	2.74989	0.263547	0.363651	FALSE	0	0	6	41616	0.00033561	65.5517	29	0	0.781264	0.0859354
GIT1	29	GIT1	2.82824	0.0960591	0.353576	FALSE	0	0	5	95680	0.001147	36.2414	29	0	0.77147	0.0614591
CUL4A	29	CUL4A	2.74679	0.169951	0.364061	FALSE	0	0	5	67482	0.00074405	46.3793	29	0	0.781651	0.0607747
GSTK1	29	1	GSTK1	2.85215	0.044335	0.350613	FALSE	0	0	5	61612	0.0006899	29.931	29	0	0.768482	0.0566786
PHB	29	PHB	2.58654	0.194581	0.386616	FALSE	0	0	6	61172	0.00055765	80.1034	29	0	0.801682	0.0778546
HSPB1	29	HSPB1	2.62151	0.0665025	0.381459	FALSE	0	0	5	209708	0.00274142	61.8966	29	0	0.797311	0.0651625
PSMD13	29	PSMD13	2.71492	0.44335	0.368335	FALSE	0	0	6	40568	0.00043398	57.5862	29	0	0.785635	0.0730352
PSEN1	29	PSEN1	2.749	0.12069	0.363768	FALSE	0	0	6	104770	0.00124763	44.1724	29	0	0.781374	0.0619718
PPARGC1A	29	PPARGC1A	2.68305	0.26601	0.372711	FALSE	0	0	6	44198	0.00034996	72.3793	29	0	0.789619	0.0842198
CARM1	29	CARM1	2.65693	0.231527	0.376375	FALSE	0	0	6	45314	0.00026885	77.7241	29	0	0.792884	0.0837332
ATF3	29	ATF3	2.75697	0.221675	0.362717	FALSE	0	0	6	90560	0.0009614	64.6207	29	0	0.780378	0.0856345
BAT3	29	BAT3	2.66578	0.0369458	0.375125	FALSE	0	0	5	184468	0.00274039	46.6207	29	0	0.791777	0.0532554
KIAA1967	29	KIAA1967	2.80168	0.0788177	0.356928	FALSE	0	0	6	90482	0.00091843	47.1379	29	0	0.77479	0.0695795
TUBA4A	29	TUBA4A	2.71934	0.0738916	0.367736	FALSE	0	0	5	77864	0.00085764	47.6897	29	0	0.785082	0.0607637
GTF2E2	28	1	2	GTF2E2	2.8734	0.142857	0.34802	FALSE	0	0	5	34204	0.00050092	35.8571	28	0	0.765826	0.0624844
CDK5	28	CDK5	2.71138	0.116402	0.368816	FALSE	0	0	5	84742	0.00098622	54.1786	28	0	0.786078	0.0693681
DNMT1	28	1	DNMT1	2.60646	0.208995	0.383662	FALSE	0	0	6	63936	0.00056628	81.6071	28	0	0.799192	0.0823593
BCAR1	28	BCAR1	2.73528	0.195767	0.365593	FALSE	0	0	5	62834	0.00064754	64.5357	28	0	0.78309	0.0854964
PPP2R1B	28	PPP2R1B	2.84993	0.193122	0.350885	FALSE	0	0	5	59520	0.0006965	39.25	28	0	0.768758	0.0687924
ch-TOG	28	ch-TOG	2.73263	0.396825	0.365948	FALSE	0	0	5	65132	0.00074623	65.2857	28	0	0.783422	0.0852941
FUS	28	FUS	2.86056	0.232804	0.349582	FALSE	0	0	6	32542	0.00035937	40.6429	28	0	0.76743	0.0713658
RHOA	28	RHOA	2.64586	0.10582	0.377949	FALSE	0	0	5	110472	0.00134338	55.7143	28	0	0.794267	0.0622896
TGFBR2	28	TGFBR2	2.64011	0.203704	0.378773	FALSE	0	0	6	156090	0.00144008	62.5714	28	0	0.794987	0.0692928
AES	28	1	2	AES	2.95662	0.0476191	0.338224	FALSE	0	0	5	216440	0.00290688	24.9643	28	0	0.755423	0.0535323
STRAP	28	STRAP	2.76184	0.0846561	0.362077	FALSE	0	0	6	106426	0.00115895	52.3571	28	0	0.77977	0.0723723
SUMO4	28	SUMO4	2.78929	0.0608466	0.358515	FALSE	0	0	6	44724	0.00052065	45.2857	28	0	0.776339	0.0669576
CD2BP2	28	CD2BP2	2.94068	0.26455	0.340057	FALSE	0	0	6	51270	0.00068719	31.4643	28	0	0.757415	0.0697619
CCT5	28	CCT5	2.61133	0.164021	0.382946	FALSE	0	0	6	123462	0.0010914	69.9286	28	0	0.798583	0.0706695
RPS3A	28	RPS3A	2.61753	0.140212	0.38204	FALSE	0	0	6	82168	0.00062412	76.7143	28	0	0.797809	0.0797161
TXN	28	1	2	TXN	2.71536	0.0687831	0.368275	FALSE	0	0	6	187476	0.00261405	48	28	0	0.78558	0.0618399
IQGAP1	28	IQGAP1	2.64807	0.0899471	0.377633	FALSE	0	0	5	124756	0.00132209	62.9286	28	0	0.793991	0.0680549
PRKCG	28	PRKCG	2.93316	0.0449735	0.34093	FALSE	0	0	5	63864	0.00062899	27.1786	28	0	0.758355	0.0633695
EIF2C2	28	EIF2C2	2.67065	0.134921	0.374441	FALSE	0	0	6	58312	0.00062377	57.5357	28	0	0.791169	0.0660858
GADD45G	28	1	GADD45G	2.80301	0.100529	0.356759	FALSE	0	0	6	76758	0.00093869	45.6429	28	0	0.774624	0.0707054
PTPRC	28	1	PTPRC	2.88136	0.193122	0.347058	FALSE	0	0	5	104184	0.00111195	42.8214	28	0	0.76483	0.0821429
ERBB4	28	ERBB4	2.67641	0.21164	0.373635	FALSE	0	0	5	95038	0.00096663	66.4643	28	0	0.790449	0.0796506
AXIN1	28	AXIN1	2.65383	0.137566	0.376814	FALSE	0	0	6	53760	0.00051917	59.8929	28	0	0.793271	0.0670243
MDM4	28	MDM4	2.57282	0.26455	0.388679	FALSE	0	0	5	50464	0.00033109	95	28	0	0.803398	0.0900474
PSMC6	27	PSMC6	2.73484	0.475783	0.365652	FALSE	0	0	6	52606	0.00039431	54.8889	27	0	0.783145	0.0714217
KDR	27	KDR	2.62904	0.253561	0.380367	FALSE	0	0	5	127170	0.00132255	75.2593	27	0	0.79637	0.0814093
UCHL5	27	1	UCHL5	2.76892	0.464387	0.361151	FALSE	0	0	6	30190	0.00023676	54.6667	27	0	0.778884	0.0760315
PINX1	27	PINX1	2.93183	0.042735	0.341084	FALSE	0	0	6	279286	0.00369401	25.2593	27	0	0.758521	0.0580651
TAF1	27	TAF1	2.78265	0.190883	0.35937	FALSE	0	0	6	36644	0.00033806	60.6667	27	0	0.777169	0.0795664
DDX17	27	1	DDX17	2.57326	0.202279	0.388612	FALSE	0	0	6	89954	0.00090661	90.2222	27	0	0.803342	0.0844875
TNFRSF14	27	TNFRSF14	2.78619	0.025641	0.358913	FALSE	0	0	5	115134	0.00138467	40.3333	27	0	0.776726	0.0612338
DAZAP2	27	1	DAZAP2	2.71138	0.108262	0.368816	FALSE	0	0	6	107712	0.00161116	47.4074	27	0	0.786078	0.0609011
BRD7	27	BRD7	2.94688	0.150997	0.339342	FALSE	0	0	6	25238	0.00032805	38.3333	27	0	0.75664	0.079135
PSMA6	27	PSMA6	2.71846	0.307692	0.367855	FALSE	0	0	6	37614	0.00027855	67.3333	27	0	0.785193	0.0870586
TUBA1	27	TUBA1	2.76804	0.376068	0.361267	FALSE	0	0	5	43144	0.0005185	51.037	27	0	0.778995	0.0708288
FAS	27	FAS	2.73085	0.136752	0.366186	FALSE	0	0	5	72068	0.0006691	57.037	27	0	0.783643	0.0757015
DAB2	27	DAB2	2.73395	0.122507	0.365771	FALSE	0	0	5	73782	0.00068685	60.6296	27	0	0.783256	0.0811335
PCBP2	27	1	PCBP2	2.7127	0.299145	0.368636	FALSE	0	0	6	48512	0.00051363	52.6667	27	0	0.785912	0.0674264
LMNA	26	LMNA	2.69323	0.129231	0.371302	FALSE	0	0	6	71768	0.00077078	63.7692	26	0	0.788347	0.0736772
PIK3CA	26	PIK3CA	2.89154	0.0492308	0.345836	FALSE	0	0	6	57080	0.00079788	33.1538	26	0	0.763557	0.0638027
FOXO3A	26	FOXO3A	2.66799	0.215385	0.374813	FALSE	0	0	6	61280	0.00049676	83.4615	26	0	0.791501	0.0954497
PSMC4	26	1	PSMC4	2.7251	0.424615	0.366959	FALSE	0	0	6	57424	0.00043932	58.2692	26	0	0.784363	0.0746085
RNF11	26	RNF11	2.72156	0.156923	0.367437	FALSE	0	0	6	49564	0.00056123	58.8462	26	0	0.784805	0.0758796
PLEC1	26	1	2	PLEC1	2.77778	0.0676923	0.36	FALSE	0	0	5	81706	0.00120997	39.1154	26	0	0.777778	0.0576351
ITGB3	26	ITGB3	2.91102	0.0892308	0.343522	FALSE	0	0	5	122420	0.00149292	34.3077	26	0	0.761122	0.0688586
NEDD8	26	NEDD8	2.59097	0.150769	0.385956	FALSE	0	0	6	106644	0.00114271	74.1154	26	0	0.801129	0.0730883
CDK7	26	CDK7	2.74768	0.184615	0.363944	FALSE	0	0	6	36776	0.00035018	62.4231	26	0	0.78154	0.0844278
CCNB1	26	CCNB1	2.71713	0.150769	0.368035	FALSE	0	0	6	46474	0.00053931	54.5	26	0	0.785359	0.0690648
HMGA1	26	1	HMGA1	2.74768	0.209231	0.363944	FALSE	0	0	6	30970	0.00027107	69.1538	26	0	0.78154	0.0910611
SNRPD2	26	SNRPD2	2.67286	0.233846	0.374131	FALSE	0	0	5	108950	0.0012419	56.8077	26	0	0.790892	0.0669785
BMPR1B	26	BMPR1B	2.85126	0.104615	0.350722	FALSE	0	0	6	80394	0.00102925	34.4615	26	0	0.768592	0.0627197
HNRPA2B1	26	HNRPA2B1	2.66268	0.366154	0.375561	FALSE	0	0	6	45618	0.00034081	67.1923	26	0	0.792165	0.0761818
MET	26	MET	2.61399	0.28	0.382557	FALSE	0	0	5	66436	0.00055606	82.8462	26	0	0.798251	0.0858509
GRB10	26	GRB10	2.78088	0.252308	0.359599	FALSE	0	0	5	33290	0.00031318	62.2692	26	0	0.77739	0.0916506
CFLAR	26	CFLAR	2.66888	0.126154	0.374689	FALSE	0	0	6	52698	0.00063964	58.9615	26	0	0.79139	0.0682325
HTT	26	HTT	2.68614	0.0984615	0.372281	FALSE	0	0	5	85870	0.0008865	60.6923	26	0	0.789232	0.0720638
GTF2F2	26	GTF2F2	2.89597	0.181538	0.345307	FALSE	0	0	6	39806	0.00056333	39.0769	26	0	0.763004	0.0728253
NFKBIE	26	NFKBIE	2.80124	0.230769	0.356985	FALSE	0	0	5	15968	0.00010608	54.4615	26	0	0.774845	0.0880632
FADD	26	FADD	2.68659	0.135385	0.372219	FALSE	0	0	5	51128	0.00061002	52.1538	26	0	0.789177	0.0635697
NR1H2	26	1	2	NR1H2	2.98583	0.209231	0.334915	FALSE	0	0	6	189218	0.0018923	43.7692	26	0	0.751771	0.0994029
SIRT2	26	1	2	SIRT2	2.95308	0.0738461	0.33863	FALSE	0	0	5	112228	0.00140576	28.2308	26	0	0.755865	0.0658563
NR1H3	26	NR1H3	2.73882	0.175385	0.36512	FALSE	0	0	6	113322	0.00150914	56.9615	26	0	0.782647	0.0743053
ADRBK1	26	ADRBK1	2.80611	0.138462	0.356365	FALSE	0	0	5	47580	0.00055119	47.8462	26	0	0.774236	0.0742912
GABARAP	25	GABARAP	2.98274	0.11	0.335263	FALSE	0	0	5	58080	0.0009703	22.4	25	0	0.752158	0.0598913
JAK3	25	JAK3	2.92209	0.283333	0.342221	FALSE	0	0	6	23686	0.00021558	43.04	25	0	0.759739	0.0893971
RXRG	25	RXRG	2.9907	0.203333	0.334369	FALSE	0	0	6	22172	0.00026333	40.56	25	0	0.751162	0.0953774
NFE2	25	1	2	NFE2	2.79548	0.0966667	0.35772	FALSE	0	0	6	245700	0.00324322	49.24	25	0	0.775564	0.0721534
PPFIA1	25	1	2	PPFIA1	3.0062	0.133333	0.332646	FALSE	0	0	6	113230	0.00140574	22.88	25	0	0.749225	0.0657391
BRAF	25	BRAF	2.78043	0.156667	0.359656	FALSE	0	0	5	52408	0.00049918	56.04	25	0	0.777446	0.0834575
ACTA2	25	ACTA2	2.91722	0.126667	0.342792	FALSE	0	0	6	95406	0.00133837	31.04	25	0	0.760347	0.0661771
PSMC3	25	PSMC3	2.72908	0.31	0.366423	FALSE	0	0	6	56032	0.00050592	57.4	25	0	0.783865	0.0739097
EPAS1	25	1	2	EPAS1	2.86631	0.07	0.34888	FALSE	0	0	6	130774	0.00170289	37.28	25	0	0.766711	0.0674681
DLG1	25	DLG1	2.7127	0.0666667	0.368636	FALSE	0	0	5	125488	0.00198356	45.56	25	0	0.785912	0.057659
EPOR	25	EPOR	2.68969	0.456667	0.371791	FALSE	0	0	5	32654	0.00013432	78.44	25	0	0.788789	0.0948488
CD44	25	1	CD44	2.80345	0.1	0.356703	FALSE	0	0	5	217022	0.00283617	46.28	25	0	0.774568	0.0746278
MYL6	25	MYL6	2.75299	0.156667	0.363242	FALSE	0	0	6	88398	0.00103076	53.64	25	0	0.780876	0.0747001
PLCG2	25	PLCG2	2.87738	0.396667	0.347538	FALSE	0	0	6	18270	0.00015298	57.84	25	0	0.765328	0.108112
ACTN2	25	ACTN2	2.9668	0.05	0.337064	FALSE	0	0	6	131436	0.00180325	26.12	25	0	0.75415	0.0656853
SMN2	25	SMN2	2.96503	0.193333	0.337265	FALSE	0	0	6	40326	0.00052657	29.4	25	0	0.754371	0.0713171
BIRC4	25	BIRC4	2.67995	0.163333	0.373142	FALSE	0	0	5	88966	0.00102835	63.04	25	0	0.790007	0.0721191
LCP2	25	LCP2	2.84551	0.413333	0.351431	FALSE	0	0	6	28724	0.00020401	65.04	25	0	0.769312	0.108514
STRN4	25	STRN4	2.93891	0.363333	0.340262	FALSE	0	0	6	85398	0.0014117	34.76	25	0	0.757636	0.0768
PSMA7	25	PSMA7	2.68792	0.266667	0.372036	FALSE	0	0	5	41086	0.00031307	62.32	25	0	0.789011	0.0765602
PSMD7	25	PSMD7	2.75122	0.5	0.363475	FALSE	0	0	6	43090	0.00032558	55.04	25	0	0.781098	0.0753909
S100A4	25	1	2	S100A4	2.85923	0.04	0.349745	FALSE	0	0	6	173606	0.00253958	33.32	25	0	0.767596	0.0583304
BAD	25	BAD	2.76096	0.16	0.362193	FALSE	0	0	5	43076	0.0004453	59.32	25	0	0.77988	0.0831461
BCL2L1	25	BCL2L1	2.82293	0.176667	0.354242	FALSE	0	0	6	35102	0.00036938	43.32	25	0	0.772134	0.0700971
NASP	25	NASP	2.74945	0.113333	0.36371	FALSE	0	0	5	43518	0.00035254	58.6	25	0	0.781319	0.0777128
SPI1	25	1	SPI1	2.79548	0.26	0.35772	FALSE	0	0	6	37798	0.00047302	66.76	25	0	0.775564	0.0962193
HSPA1B	25	HSPA1B	2.70208	0.153333	0.370085	FALSE	0	0	6	51520	0.00047221	67.52	25	0	0.78724	0.0801427
ACVR1	25	1	ACVR1	2.84241	0.113333	0.351814	FALSE	0	0	6	74650	0.00079725	43.36	25	0	0.769699	0.0738461
G3BP	25	G3BP	2.61842	0.0666667	0.38191	FALSE	0	0	6	108726	0.00139903	66.24	25	0	0.797698	0.0695671
MED28	25	MED28	2.8548	0.176667	0.350287	FALSE	0	0	5	55300	0.00066409	47	25	0	0.76815	0.0819615
PRNP	25	1	PRNP	2.80301	0.06	0.356759	FALSE	0	0	5	69682	0.00109657	37.68	25	0	0.774624	0.0598395
ORC1L	25	ORC1L	2.70784	0.193333	0.369299	FALSE	0	0	6	62076	0.00068223	58.4	25	0	0.786521	0.0735013
ATF7IP	25	ATF7IP	2.81806	0.0766667	0.354854	FALSE	0	0	5	52118	0.00074729	39.16	25	0	0.772742	0.0624077
PA2G4	25	PA2G4	2.74945	0.07	0.36371	FALSE	0	0	6	74306	0.00075748	57.16	25	0	0.781319	0.0756915
COPS2	25	COPS2	2.83046	0.22	0.3533	FALSE	0	0	6	41914	0.00041656	52	25	0	0.771193	0.0815699
RBM9	25	1	2	RBM9	3.01948	0.133333	0.331183	FALSE	0	0	6	113970	0.00143717	23.84	25	0	0.747565	0.0637197
APG5L	25	APG5L	2.9668	0.05	0.337064	FALSE	0	0	5	33312	0.00043891	25.92	25	0	0.75415	0.06784
NCF1	24	NCF1	2.74281	0.119565	0.36459	FALSE	0	0	5	45422	0.00043779	59.7083	24	0	0.782149	0.0816187
INPP5D	24	INPP5D	2.99247	0.264493	0.334172	FALSE	0	0	5	38522	0.00030731	42.7917	24	0	0.750941	0.101544
RBL2	24	RBL2	2.68039	0.235507	0.37308	FALSE	0	0	6	42174	0.00038724	72.875	24	0	0.789951	0.0825775
CDC25C	24	CDC25C	2.59672	0.181159	0.385101	FALSE	0	0	6	85972	0.0011281	89.2083	24	0	0.800409	0.0883713
MED31	24	MED31	2.98938	0.076087	0.334518	FALSE	0	0	5	32198	0.00047985	25.5833	24	0	0.751328	0.0679054
ARAF	24	ARAF	2.87472	0.0543478	0.34786	FALSE	0	0	6	93274	0.00121442	39.7917	24	0	0.76566	0.0696903
RAD23A	24	RAD23A	2.65914	0.155797	0.376061	FALSE	0	0	5	100586	0.00127469	67.9583	24	0	0.792607	0.0780172
CRMP1	24	CRMP1	2.96459	0.0181159	0.337315	FALSE	0	0	6	115330	0.00148212	23.9583	24	0	0.754427	0.0629505
EIF3S5	24	EIF3S5	2.63347	0.173913	0.379728	FALSE	0	0	6	89164	0.00092787	70.5833	24	0	0.795817	0.0766757
CASP4	24	CASP4	3.01372	0.0326087	0.331816	FALSE	0	0	6	50254	0.00063	20.625	24	0	0.748285	0.0633544
C1QBP	24	C1QBP	2.66932	0.123188	0.374627	FALSE	0	0	6	96120	0.0011431	70.75	24	0	0.791335	0.0821193
ASH2L	24	ASH2L	2.84551	0.166667	0.351431	FALSE	0	0	5	32662	0.00031962	44.3333	24	0	0.769312	0.0736966
ACTN4	24	ACTN4	2.67685	0.0471015	0.373574	FALSE	0	0	6	129322	0.00158309	56.8333	24	0	0.790394	0.0673653
NFE2L2	24	NFE2L2	2.67862	0.235507	0.373327	FALSE	0	0	6	53718	0.00043709	77.875	24	0	0.790173	0.087848
GSN	24	GSN	2.72864	0.105072	0.366483	FALSE	0	0	5	78402	0.00087616	56.9167	24	0	0.78392	0.072517
FLNB	24	1	2	FLNB	2.89686	0.0869565	0.345202	FALSE	0	0	5	67392	0.00081954	37.9583	24	0	0.762893	0.076799
MBP	24	MBP	2.78752	0.076087	0.358742	FALSE	0	0	6	72944	0.00095093	47.1667	24	0	0.77656	0.0721451
TPM3	24	1	TPM3	2.86366	0.152174	0.349204	FALSE	0	0	6	74722	0.00084583	43.1667	24	0	0.767043	0.07474
EIF3S6	24	EIF3S6	2.78442	0.0398551	0.359141	FALSE	0	0	6	72442	0.00093578	41.5417	24	0	0.776948	0.0657051
STAT6	24	STAT6	2.72997	0.221014	0.366305	FALSE	0	0	6	49302	0.00040773	74.6667	24	0	0.783754	0.0950637
FANCD2	24	FANCD2	2.69898	0.195652	0.37051	FALSE	0	0	5	57050	0.00056145	69.3333	24	0	0.787627	0.0839899
TGFB1	24	TGFB1	3.02258	0.115942	0.330844	FALSE	0	0	6	227406	0.00264503	19.6667	24	0	0.747178	0.0610073
SNRPD3	24	SNRPD3	2.8039	0.221014	0.356647	FALSE	0	0	6	81924	0.0007972	46.6667	24	0	0.774513	0.069965
TOP1	24	TOP1	2.63435	0.224638	0.3796	FALSE	0	0	6	32350	0.00026708	83.4167	24	0	0.795706	0.0850323
TRIM63	24	TRIM63	2.93316	0.0978261	0.34093	FALSE	0	0	6	69166	0.00123994	26.125	24	0	0.758355	0.055794
SNRPN	24	1	2	SNRPN	2.98141	0.0253623	0.335412	FALSE	0	0	6	76242	0.00105184	27	24	0	0.752324	0.0606843
CAPN1	24	CAPN1	2.65383	0.0797101	0.376814	FALSE	0	0	5	121810	0.00158237	58.5833	24	0	0.793271	0.0654026
UBTF	24	UBTF	2.82647	0.141304	0.353798	FALSE	0	0	6	42180	0.00046869	51.6667	24	0	0.771691	0.0795396
Cep70	23	Cep70	2.87694	0.494071	0.347592	FALSE	0	0	5	25984	0.00035568	45.3913	23	0	0.765383	0.0838969
FLJ38628	23	FLJ38628	2.73794	0.181818	0.365238	FALSE	0	0	6	46632	0.00044999	64.9565	23	0	0.782758	0.0833799
MLLT4	23	MLLT4	2.8278	0.0948617	0.353632	FALSE	0	0	5	43264	0.00046813	48.5652	23	0	0.771525	0.0785709
EIF3S3	23	EIF3S3	2.69942	0.173913	0.370449	FALSE	0	0	6	71896	0.00079817	62.087	23	0	0.787572	0.0746089
FLNC	23	FLNC	2.8517	0.0790514	0.350667	FALSE	0	0	5	145920	0.00172461	49.6087	23	0	0.768537	0.0861175
MEP50	23	MEP50	2.74015	0.197628	0.364943	FALSE	0	0	6	69362	0.00073457	56.913	23	0	0.782481	0.0753239
FRAP1	23	FRAP1	2.81054	0.12253	0.355804	FALSE	0	0	5	36002	0.00042911	47.8261	23	0	0.773683	0.0749932
MTA1	23	MTA1	2.72333	0.300395	0.367198	FALSE	0	0	5	46556	0.00055581	73.4348	23	0	0.784584	0.092673
PTN	23	PTN	2.87782	0.027668	0.347485	FALSE	0	0	6	54164	0.00074167	32.1304	23	0	0.765272	0.0618073
DNAJA1	23	DNAJA1	2.74059	0.102767	0.364885	FALSE	0	0	6	38602	0.00033563	61.6957	23	0	0.782426	0.081213
LRPPRC	23	LRPPRC	2.58521	0.0750988	0.386815	FALSE	0	0	5	113572	0.0007832	92.1739	23	0	0.801848	0.0892382
PRKD1	23	PRKD1	2.75697	0.162055	0.362717	FALSE	0	0	5	267612	0.00332654	62	23	0	0.780378	0.0847498
AATF	23	1	2	AATF	2.93493	0.0750988	0.340724	FALSE	0	0	6	30650	0.00047118	34.913	23	0	0.758134	0.0708535
GRIP1	23	GRIP1	2.66003	0.26087	0.375936	FALSE	0	0	6	75244	0.00092286	94.2174	23	0	0.792497	0.102474
RFC4	23	1	2	RFC4	2.82205	0.213439	0.354353	FALSE	0	0	6	42530	0.00051575	48.9565	23	0	0.772244	0.0737753
PPARD	23	PPARD	2.82913	0.225296	0.353466	FALSE	0	0	6	26166	0.00021249	67.7391	23	0	0.771359	0.106807
BLM	23	BLM	2.88313	0.189723	0.346845	FALSE	0	0	6	86896	0.00090287	44.913	23	0	0.764608	0.0797617
HIST2H4	23	HIST2H4	2.71049	0.158103	0.368937	FALSE	0	0	6	42118	0.00028502	68.6087	23	0	0.786189	0.0858668
SMAD5	23	SMAD5	2.83842	0.177866	0.352308	FALSE	0	0	6	35432	0.00041679	48.0435	23	0	0.770197	0.0827514
VDAC1	23	VDAC1	2.66578	0.118577	0.375125	FALSE	0	0	5	62814	0.00063495	66.1739	23	0	0.791777	0.0754286
PSME3	23	1	PSME3	2.64365	0.0909091	0.378265	FALSE	0	0	6	61100	0.00063925	76	23	0	0.794544	0.0808714
WDR39	23	WDR39	3.03054	0.0237154	0.329974	FALSE	0	0	6	44480	0.00052818	25.1304	23	0	0.746182	0.0704648
EPS15	23	EPS15	2.64586	0.241107	0.377949	FALSE	0	0	5	79034	0.00054873	80.6522	23	0	0.794267	0.0893158
BRF2	23	BRF2	3.09473	0.00395257	0.32313	FALSE	0	0	6	54290	0.00057449	19.087	23	0	0.738158	0.0688406
NUP93	23	NUP93	2.75874	0.0513834	0.362484	FALSE	0	0	6	90396	0.0008381	54.6957	23	0	0.780157	0.0716214
DOK1	23	DOK1	2.94998	0.29249	0.338986	FALSE	0	0	5	19782	0.0001708	57.3913	23	0	0.756253	0.125667
SF3A1	23	SF3A1	2.79504	0.0750988	0.357776	FALSE	0	0	5	80472	0.00088307	48.1304	23	0	0.77562	0.0727273
CACYBP	23	CACYBP	2.66622	0.0632411	0.375062	FALSE	0	0	6	105956	0.00124072	70.4348	23	0	0.791722	0.078896
TRIP4	23	1	TRIP4	2.81009	0.391304	0.35586	FALSE	0	0	6	17456	0.000126	81.0435	23	0	0.773738	0.122607
THRAP4	23	THRAP4	2.86498	0.272727	0.349042	FALSE	0	0	6	25128	0.00022249	62	23	0	0.766877	0.106822
SAT1	23	SAT1	2.84064	0.0592885	0.352034	FALSE	0	0	6	103410	0.00122827	43.3913	23	0	0.76992	0.0697478
GFI1B	23	GFI1B	2.90394	0.00395257	0.34436	FALSE	0	0	6	62236	0.00087378	26.9565	23	0	0.762008	0.0604257
WAS	23	WAS	2.8278	0.162055	0.353632	FALSE	0	0	5	46732	0.00048725	59.5217	23	0	0.771525	0.0958769
CSNK1A1	23	CSNK1A1	2.69013	0.110672	0.371729	FALSE	0	0	6	48492	0.00055083	67.7826	23	0	0.788734	0.0798727
JUNB	23	JUNB	2.65826	0.363636	0.376187	FALSE	0	0	6	48444	0.00031512	90.1304	23	0	0.792718	0.0976023
NR1H4	22	NR1H4	2.77025	0.277056	0.360978	FALSE	0	0	5	20258	0.00012117	75.7727	22	0	0.778718	0.104245
ID3	22	1	ID3	2.99292	0.04329	0.334122	FALSE	0	0	5	55292	0.00067881	23.9545	22	0	0.750885	0.0664435
ESRRA	22	ESRRA	2.85038	0.134199	0.350831	FALSE	0	0	6	53702	0.00059282	54.8182	22	0	0.768703	0.0910609
RPS6KA1	22	RPS6KA1	2.74945	0.116883	0.36371	FALSE	0	0	5	45662	0.00047537	65.6818	22	0	0.781319	0.086178
MTA2	22	MTA2	2.8278	0.337662	0.353632	FALSE	0	0	6	17840	0.00016191	65.3182	22	0	0.771525	0.0957078
PSMD10	22	PSMD10	2.72598	0.515152	0.36684	FALSE	0	0	6	33574	0.00025945	73.5	22	0	0.784252	0.0917603
APEX1	22	1	APEX1	2.68305	0.160173	0.372711	FALSE	0	0	5	35726	0.0002915	76.4091	22	0	0.789619	0.0890019
CCT3	22	CCT3	2.69057	0.251082	0.371668	FALSE	0	0	6	49966	0.00037371	73.5	22	0	0.788679	0.0856114
PSEN2	22	PSEN2	2.68924	0.168831	0.371852	FALSE	0	0	6	58722	0.00078322	57.6818	22	0	0.788845	0.069947
MAP3K1	22	MAP3K1	2.6193	0.168831	0.381781	FALSE	0	0	5	106792	0.0012419	83.2727	22	0	0.797587	0.08549
HAP1	22	HAP1	2.95795	0.0735931	0.338072	FALSE	0	0	6	80722	0.0012398	27.0909	22	0	0.755257	0.0665382
CTNND1	22	CTNND1	2.7614	0.155844	0.362135	FALSE	0	0	6	66174	0.00075657	62.0909	22	0	0.779825	0.0836094
TRIM33	22	1	TRIM33	2.97831	0.186147	0.335761	FALSE	0	0	6	23864	0.00028537	41.6364	22	0	0.752711	0.0959479
FSCN1	22	FSCN1	2.72377	0.0519481	0.367138	FALSE	0	0	6	82920	0.00076231	62.8636	22	0	0.784529	0.0797194
NR2E3	22	1	NR2E3	2.97034	0.242424	0.336662	FALSE	0	0	6	70810	0.00077152	51.3182	22	0	0.753707	0.106913
EZR	22	EZR	2.82647	0.112554	0.353798	FALSE	0	0	5	80614	0.000884	45.3182	22	0	0.771691	0.075277
TTN	22	1	TTN	2.93493	0.0692641	0.340724	FALSE	0	0	6	168592	0.00254634	30	22	0	0.758134	0.06389
USP11	22	USP11	2.91191	0.0519481	0.343417	FALSE	0	0	5	46898	0.00065865	30.4091	22	0	0.761012	0.0595799
PIAS2	22	PIAS2	2.72244	0.238095	0.367317	FALSE	0	0	5	33440	0.0002984	78.5909	22	0	0.784695	0.0998036
THOC4	22	THOC4	2.74458	0.398268	0.364355	FALSE	0	0	5	30566	0.0002869	57.9091	22	0	0.781928	0.0780446
WDR48	22	WDR48	2.84241	0.103896	0.351814	FALSE	0	0	6	55694	0.00072233	45.2727	22	0	0.769699	0.0795656
SF3B1	22	1	SF3B1	2.66135	0.12987	0.375748	FALSE	0	0	6	56768	0.00045024	76.3636	22	0	0.792331	0.0833002
PELP1	22	1	PELP1	2.73085	0.251082	0.366186	FALSE	0	0	6	25774	0.00018592	84.5455	22	0	0.783643	0.109908
NEK2	22	NEK2	2.88579	0.541126	0.346526	FALSE	0	0	5	31134	0.00047904	47.5	22	0	0.764276	0.091347
TJP1	22	TJP1	2.84108	0.0952381	0.351979	FALSE	0	0	6	144290	0.00199901	42.7727	22	0	0.769865	0.0726032
CLU	22	CLU	2.59938	0.134199	0.384707	FALSE	0	0	5	60354	0.00052348	82.7273	22	0	0.800077	0.0825909
TYK2	22	TYK2	2.89199	0.242424	0.345783	FALSE	0	0	5	36826	0.00031161	50.5909	22	0	0.763502	0.0987216
WNK1	22	WNK1	2.85347	0.121212	0.35045	FALSE	0	0	5	34592	0.0004791	41.7273	22	0	0.768316	0.0727273
CCT7	22	1	CCT7	2.7313	0.164502	0.366126	FALSE	0	0	6	56196	0.00046589	62.6364	22	0	0.783588	0.0807362
EPRS	22	EPRS	2.72112	0.164502	0.367496	FALSE	0	0	6	38112	0.00036863	69.4545	22	0	0.784861	0.0862674
USP14	22	USP14	2.81496	0.454545	0.355245	FALSE	0	0	6	17954	0.00021948	49.5455	22	0	0.77313	0.0774226
SAT	22	SAT	2.8942	0.0822511	0.345519	FALSE	0	0	6	72910	0.00073456	39.6818	22	0	0.763225	0.0750388
RAP1A	22	RAP1A	2.7822	0.0909091	0.359427	FALSE	0	0	5	50012	0.00054456	49.0455	22	0	0.777224	0.0748991
MCM10	21	MCM10	2.99956	0.233333	0.333383	FALSE	0	0	6	28914	0.00036614	35.8095	21	0	0.750055	0.0881834
GTF2E1	21	GTF2E1	2.9699	0.195238	0.336712	FALSE	0	0	6	29588	0.00038581	33.7619	21	0	0.753763	0.0779623
PRPF40A	21	PRPF40A	2.89819	0.0333333	0.345044	FALSE	0	0	5	94826	0.00111053	32.8571	21	0	0.762727	0.0649612
WASL	21	WASL	2.88225	0.0952381	0.346951	FALSE	0	0	5	39848	0.00039787	49.8095	21	0	0.764719	0.097774
MEF2D	21	MEF2D	2.8548	0.180952	0.350287	FALSE	0	0	6	16920	0.00013594	60.9048	21	0	0.76815	0.101171
CTTNBP2	21	CTTNBP2	3.15936	0.557143	0.31652	FALSE	0	0	6	14298	8.315e-05	28.8571	21	0	0.73008	0.139852
HNRNPK	21	HNRNPK	2.84728	0.109524	0.351213	FALSE	0	0	6	41966	0.00049351	49	21	0	0.76909	0.0835165
HIPK2	21	HIPK2	2.64143	0.328571	0.378582	FALSE	0	0	6	31172	0.00022998	97	21	0	0.794821	0.102378
TBL1X	21	TBL1X	2.92784	0.32381	0.341548	FALSE	0	0	6	10506	8.247e-05	55.619	21	0	0.759019	0.114678
C14orf1	21	C14orf1	2.97123	0.0190476	0.336561	FALSE	0	0	5	50422	0.00067167	25.8571	21	0	0.753597	0.0668182
CHEK2	21	CHEK2	2.82736	0.185714	0.353687	FALSE	0	0	6	22618	0.00026553	54.7619	21	0	0.77158	0.0876068
PMS2	21	PMS2	2.73971	0.157143	0.365002	FALSE	0	0	6	43994	0.00050666	60.0476	21	0	0.782537	0.0766283
TRAF3IP1	21	TRAF3IP1	2.80744	0.119048	0.356197	FALSE	0	0	5	77234	0.00083791	49.6667	21	0	0.77407	0.0810304
POLR2B	21	POLR2B	2.74192	0.214286	0.364708	FALSE	0	0	6	40652	0.00043278	62.7619	21	0	0.78226	0.0799927
SNRPG	21	SNRPG	3.11377	0.261905	0.321154	FALSE	0	0	6	29750	0.00042819	27.381	21	0	0.735779	0.0903338
SIAHBP1	21	SIAHBP1	2.90792	0.147619	0.343888	FALSE	0	0	5	40408	0.00057634	37.1429	21	0	0.76151	0.0753
MST1R	21	MST1R	2.62594	0.328571	0.380816	FALSE	0	0	5	32474	0.00020499	106.143	21	0	0.796757	0.111729
KLF5	21	KLF5	2.62771	0.295238	0.380559	FALSE	0	0	6	38492	0.00026593	102.143	21	0	0.796536	0.104869
FBL	21	FBL	2.76228	0.109524	0.362019	FALSE	0	0	6	34588	0.0003535	55.1905	21	0	0.779714	0.074793
TOPORS	21	TOPORS	2.80345	0.119048	0.356703	FALSE	0	0	6	59546	0.00037955	62.4286	21	0	0.774568	0.0914566
CDT1	21	CDT1	2.73838	0.17619	0.365179	FALSE	0	0	6	23600	0.00019913	70.619	21	0	0.782703	0.0906535
DDX21	21	DDX21	2.83355	0.152381	0.352914	FALSE	0	0	6	38068	0.00030407	56.4286	21	0	0.770806	0.0928846
CPSF5	21	CPSF5	2.80921	0.0714286	0.355972	FALSE	0	0	6	62810	0.00068662	54.2381	21	0	0.773849	0.0840948
ARNT	21	ARNT	2.74413	0.247619	0.364414	FALSE	0	0	6	40900	0.00043056	78.8571	21	0	0.781983	0.102894
CDC6	21	CDC6	2.93227	0.242857	0.341033	FALSE	0	0	6	22254	0.00019807	48.9048	21	0	0.758466	0.101153
LYAR	21	1	LYAR	3.0301	0.0476191	0.330022	FALSE	0	0	6	28916	0.00034739	23.0952	21	0	0.746237	0.0768731
FALZ	21	1	2	FALZ	3.1089	0.233333	0.321657	FALSE	0	0	6	12852	0.0001205	35.2857	21	0	0.736388	0.115157
MYH10	21	MYH10	2.80832	0.109524	0.356084	FALSE	0	0	6	34036	0.00027731	57.0476	21	0	0.77396	0.0908952
TRA1	21	TRA1	2.61709	0.128571	0.382104	FALSE	0	0	6	91342	0.00085377	83.1905	21	0	0.797864	0.0854889
SNRPE	21	SNRPE	3.14475	0.366667	0.31799	FALSE	0	0	6	46668	0.00051806	24.0476	21	0	0.731906	0.0991899
SNRPF	21	1	2	SNRPF	3.13988	0.27619	0.318483	FALSE	0	0	6	44888	0.00052088	26	21	0	0.732514	0.0936853
FLT1	21	FLT1	2.8641	0.338095	0.34915	FALSE	0	0	5	174198	0.00222883	61.7143	21	0	0.766988	0.11303
DDIT3	21	DDIT3	2.75343	0.409524	0.363183	FALSE	0	0	6	30122	0.00024035	63.7619	21	0	0.780821	0.0828534
RPS6KA3	21	RPS6KA3	2.78398	0.0666667	0.359199	FALSE	0	0	6	40384	0.00046582	56.3333	21	0	0.777003	0.0809524
FNBP1	20	1	2	FNBP1	3.01992	0.0631579	0.331135	FALSE	0	0	5	115916	0.00158354	25.7	20	0	0.74751	0.0802215
PLSCR1	20	PLSCR1	2.88889	0.0947368	0.346154	FALSE	0	0	6	52686	0.00068104	45.45	20	0	0.763889	0.0864683
TPR	20	1	2	TPR	2.7645	0.0631579	0.361729	FALSE	0	0	6	32586	0.00035612	54.55	20	0	0.779438	0.0747586
CTTN	20	CTTN	2.79947	0.152632	0.357211	FALSE	0	0	5	32116	0.00036616	54.25	20	0	0.775066	0.0819697
GNA12	20	1	GNA12	2.93183	0.110526	0.341084	FALSE	0	0	5	70612	0.00099428	39.3	20	0	0.758521	0.0834755
SMARCD1	20	1	SMARCD1	2.74192	0.268421	0.364708	FALSE	0	0	5	56638	0.00046121	76.25	20	0	0.78226	0.0983871
TNFRSF10D	20	TNFRSF10D	3.04869	0.00526316	0.328009	FALSE	0	0	6	33624	0.00031514	22.9	20	0	0.743913	0.0780142
RFP	20	RFP	2.72731	0.152632	0.366661	FALSE	0	0	6	52960	0.00048765	70.5	20	0	0.784086	0.0877029
MARK3	20	MARK3	2.69146	0.231579	0.371546	FALSE	0	0	6	49800	0.00061122	86	20	0	0.788568	0.0997674
DDX24	20	1	DDX24	2.84728	0.0421053	0.351213	FALSE	0	0	6	85434	0.00117617	42.3	20	0	0.76909	0.0732925
UBE3A	20	UBE3A	2.74679	0.115789	0.364061	FALSE	0	0	6	90166	0.00077193	69.7	20	0	0.781651	0.0945652
RET	20	RET	2.81098	0.326316	0.355748	FALSE	0	0	5	20198	0.00017514	74.45	20	0	0.773628	0.120227
TRIM24	20	TRIM24	2.93625	0.205263	0.34057	FALSE	0	0	5	16846	0.00013492	57.75	20	0	0.757968	0.119813
FANCG	20	FANCG	3.16379	0.263158	0.316077	FALSE	0	0	6	83516	0.00102575	17.9	20	0	0.729526	0.0874384
ITGB4	20	1	ITGB4	2.83134	0.121053	0.353189	FALSE	0	0	5	53780	0.0006969	55.5	20	0	0.771082	0.0905738
RFC5	20	RFC5	2.7521	0.126316	0.363359	FALSE	0	0	6	41732	0.0004204	55.9	20	0	0.780987	0.0764463
FOXO1A	20	FOXO1A	2.5768	0.357895	0.388078	FALSE	0	0	5	25182	0.0001627	117.95	20	0	0.8029	0.11212
BAG1	20	BAG1	2.69898	0.257895	0.37051	FALSE	0	0	5	19278	0.00016486	86.45	20	0	0.787627	0.102007
PSMD14	20	PSMD14	2.77866	0.542105	0.359885	FALSE	0	0	6	50586	0.00056835	64.85	20	0	0.777667	0.0924394
CXCR4	20	1	CXCR4	2.7583	0.252632	0.362542	FALSE	0	0	6	44314	0.00034923	65.35	20	0	0.780212	0.090625
GATA2	20	GATA2	2.79858	0.368421	0.357324	FALSE	0	0	5	10210	5.327e-05	83.95	20	0	0.775177	0.123275
PKD1	20	PKD1	2.65471	0.168421	0.376688	FALSE	0	0	6	194864	0.00233349	74.1	20	0	0.793161	0.0840341
GHR	20	GHR	2.8942	0.326316	0.345519	FALSE	0	0	5	12542	9.999e-05	63.5	20	0	0.763225	0.126295
GCN1L1	20	GCN1L1	2.79726	0.0263158	0.357493	FALSE	0	0	6	61462	0.00046945	58.1	20	0	0.775343	0.0841642
MED1	20	MED1	2.83533	0.221053	0.352693	FALSE	0	0	6	23584	0.00016485	74.5	20	0	0.770584	0.12165
CFL1	20	CFL1	2.78575	0.126316	0.35897	FALSE	0	0	6	45710	0.00054463	61.55	20	0	0.776782	0.0861657
COIL	20	COIL	2.97521	0.0157895	0.336111	FALSE	0	0	6	39948	0.00062216	29.2	20	0	0.753099	0.0691748
TRIB3	20	TRIB3	2.695	0.0526316	0.371058	FALSE	0	0	5	63714	0.00075846	62	20	0	0.788125	0.0755843
WDR8	20	WDR8	3.05755	0.0157895	0.32706	FALSE	0	0	6	23994	0.00028005	23.25	20	0	0.742807	0.0756757
WWP1	20	WWP1	2.72156	0.152632	0.367437	FALSE	0	0	6	27494	0.00030055	64.9	20	0	0.784805	0.0822745
MORF4L1	20	MORF4L1	2.84329	0.289474	0.351705	FALSE	0	0	6	70418	0.00091837	56.15	20	0	0.769588	0.0935726
LZTR1	20	LZTR1	2.93183	0.0368421	0.341084	FALSE	0	0	6	59954	0.00088104	31.25	20	0	0.758521	0.0681111
KRT8	20	KRT8	2.61797	0.205263	0.381975	FALSE	0	0	5	80262	0.00120277	85.1	20	0	0.797753	0.0899471
RFC1	20	RFC1	2.7915	0.247368	0.35823	FALSE	0	0	6	22692	0.00023595	65.9	20	0	0.776062	0.098209
CDC25B	20	CDC25B	2.76184	0.168421	0.362077	FALSE	0	0	6	21452	0.0001683	77.4	20	0	0.77977	0.105677
TDG	20	TDG	2.78088	0.389474	0.359599	FALSE	0	0	6	11120	7.11e-05	94.75	20	0	0.77739	0.13338
FAM40A	20	FAM40A	3.16246	0.726316	0.316209	FALSE	0	0	6	11468	6.235e-05	30.5	20	0	0.729692	0.131466
CLNS1A	20	1	2	CLNS1A	3.08145	0.210526	0.324522	FALSE	0	0	6	30874	0.00044941	26.4	20	0	0.739819	0.0909722
PPP1CB	20	PPP1CB	2.71757	0.121053	0.367975	FALSE	0	0	6	73066	0.00106434	68.8	20	0	0.785303	0.0830508
EIF2C3	20	EIF2C3	2.71492	0.236842	0.368335	FALSE	0	0	5	25572	0.00021835	66.55	20	0	0.785635	0.0864109
MEF2C	20	MEF2C	2.80434	0.173684	0.35659	FALSE	0	0	6	21498	0.00019749	62.6	20	0	0.774458	0.091048
ELK1	20	ELK1	2.71049	0.215789	0.368937	FALSE	0	0	5	46966	0.00043475	83.9	20	0	0.786189	0.101762
CCT2	20	CCT2	2.70739	0.236842	0.369359	FALSE	0	0	6	45734	0.00030413	74.45	20	0	0.786576	0.0908313
ITGB2	20	ITGB2	2.9398	0.105263	0.34016	FALSE	0	0	6	69188	0.00095985	40.05	20	0	0.757525	0.0864425
EIF3S2	20	EIF3S2	2.65339	0.131579	0.376877	FALSE	0	0	6	78650	0.00076502	78.9	20	0	0.793327	0.0878484
UBQLN1	20	UBQLN1	2.80921	0.0947368	0.355972	FALSE	0	0	6	136730	0.00224711	44.6	20	0	0.773849	0.0699527
CD40	19	1	CD40	2.84241	0.0818713	0.351814	FALSE	0	0	5	23518	0.00024433	52.1053	19	0	0.769699	0.0874822
ITGB3BP	19	ITGB3BP	2.88889	0.0935673	0.346154	FALSE	0	0	6	37834	0.00045297	46.6842	19	0	0.763889	0.0884893
RAD23B	19	RAD23B	2.7521	0.22807	0.363359	FALSE	0	0	6	23666	0.00024399	64	19	0	0.780987	0.0882524
CCT8	19	CCT8	2.69677	0.309942	0.370814	FALSE	0	0	6	48288	0.00031789	79.2632	19	0	0.787904	0.0945861
NUMB	19	NUMB	2.78486	0.0935673	0.359084	FALSE	0	0	6	44678	0.00046118	59.1053	19	0	0.776892	0.0899726
MORF4L2	19	MORF4L2	2.86144	0.315789	0.349474	FALSE	0	0	6	22640	0.00018496	59.5789	19	0	0.76732	0.099133
CSPG6	19	CSPG6	2.84418	0.0877193	0.351595	FALSE	0	0	5	47614	0.00045334	51.6842	19	0	0.769478	0.0799281
UBE2L6	19	UBE2L6	3.14918	0.00584795	0.317543	FALSE	0	0	6	27276	0.00026925	15.2632	19	0	0.731352	0.0729362
FLJ13150	19	FLJ13150	3.01062	0.0818713	0.332157	FALSE	0	0	5	40168	0.00053557	27.2105	19	0	0.748672	0.0772837
MYBBP1A	19	MYBBP1A	2.69234	0.134503	0.371424	FALSE	0	0	6	33854	0.00029841	78.5263	19	0	0.788457	0.0909757
RNF2	19	RNF2	2.72289	0.146199	0.367257	FALSE	0	0	5	58534	0.00054759	68.4737	19	0	0.784639	0.0849297
MSN	19	1	MSN	2.90792	0.0994152	0.343888	FALSE	0	0	6	34832	0.00047309	36.8947	19	0	0.76151	0.0806246
MNAT1	19	MNAT1	2.83178	0.181287	0.353134	FALSE	0	0	6	21868	0.00019908	59.8421	19	0	0.771027	0.100053
RALGDS	19	RALGDS	3.03896	0.146199	0.32906	FALSE	0	0	6	14056	0.00017141	29.3684	19	0	0.745131	0.0865774
VASP	19	VASP	2.99425	0.0877193	0.333974	FALSE	0	0	5	45464	0.00070433	28.9474	19	0	0.750719	0.07074
PARD3	19	1	PARD3	2.80345	0.122807	0.356703	FALSE	0	0	5	121708	0.00156111	64.4211	19	0	0.774568	0.0986235
PDCD10	19	PDCD10	3.14475	0.678363	0.31799	FALSE	0	0	6	8120	6.605e-05	31.0526	19	0	0.731906	0.129167
STK25	19	STK25	2.97742	0.54386	0.335861	FALSE	0	0	6	37882	0.00045634	42.4737	19	0	0.752822	0.101369
RARG	19	RARG	2.92342	0.216374	0.342065	FALSE	0	0	6	15724	0.00012981	52.4211	19	0	0.759573	0.106874
OTUB1	19	OTUB1	2.69588	0.116959	0.370936	FALSE	0	0	5	49440	0.00047357	79.8421	19	0	0.788015	0.0948498
COPS4	19	1	COPS4	2.6618	0.28655	0.375686	FALSE	0	0	6	78750	0.00106355	77.8421	19	0	0.792275	0.0848655
RBBP5	19	RBBP5	2.87871	0.216374	0.347378	FALSE	0	0	5	21774	0.00020006	48.8421	19	0	0.765162	0.0887081
PTPRF	19	1	PTPRF	2.96636	0.146199	0.337114	FALSE	0	0	6	27176	0.0002942	40	19	0	0.754205	0.0956478
CBX1	19	CBX1	3.0664	0.204678	0.326115	FALSE	0	0	6	22550	0.00028111	33.5263	19	0	0.7417	0.0977003
CDK6	19	CDK6	2.83931	0.187135	0.352198	FALSE	0	0	6	27806	0.00027042	55	19	0	0.770086	0.0881706
ACTC1	19	ACTC1	3.04604	0.0233918	0.328295	FALSE	0	0	5	35176	0.00050544	20.8421	19	0	0.744245	0.0712293
RFWD2	19	RFWD2	2.74723	0.210526	0.364003	FALSE	0	0	6	9798	7.728e-05	75.2632	19	0	0.781596	0.0990305
USP20	19	USP20	2.99513	0.0584795	0.333875	FALSE	0	0	6	154100	0.00230153	26.6842	19	0	0.750609	0.074041
YAP1	19	YAP1	2.84064	0.0818713	0.352034	FALSE	0	0	5	58900	0.00072519	53.6842	19	0	0.76992	0.0899973
CCR5	19	CCR5	3.00797	0.187135	0.33245	FALSE	0	0	5	125428	0.00140247	36.1053	19	0	0.749004	0.105109
TIMM50	19	TIMM50	2.71625	0.22807	0.368155	FALSE	0	0	5	35580	0.00027455	85	19	0	0.785469	0.103721
MATR3	19	MATR3	2.63745	0.122807	0.379154	FALSE	0	0	6	53146	0.00044226	84.8947	19	0	0.795319	0.0905713
VCAN	19	1	2	VCAN	3.44489	0.0233918	0.290285	FALSE	0	0	6	278684	0.00401684	7.42105	19	0	0.694389	0.0678947
DNM1	19	1	DNM1	2.86189	0.152047	0.34942	FALSE	0	0	5	26340	0.00025343	59.0526	19	0	0.767264	0.107577
FOXO1	19	FOXO1	2.71093	0.350877	0.368877	FALSE	0	0	5	19786	0.00012841	101.526	19	0	0.786133	0.120007
PPP1CC	19	PPP1CC	2.72643	0.169591	0.36678	FALSE	0	0	6	28452	0.00025075	85.6316	19	0	0.784197	0.104555
VCL	19	VCL	2.82337	0.175439	0.354186	FALSE	0	0	6	51240	0.00069369	53.5263	19	0	0.772078	0.0842603
SNRPD1	19	SNRPD1	2.83931	0.309942	0.352198	FALSE	0	0	6	48446	0.00044841	49.5263	19	0	0.770086	0.0797963
IL2RB	19	IL2RB	2.67375	0.491228	0.374007	FALSE	0	0	5	23724	0.00011054	97.4211	19	0	0.790781	0.112756
PECAM1	18	PECAM1	2.86144	0.261438	0.349474	FALSE	0	0	5	24962	0.00020243	72.8889	18	0	0.76732	0.127457
TBL1XR1	18	TBL1XR1	3.06596	0.385621	0.326162	FALSE	0	0	6	4366	3.284e-05	53.0556	18	0	0.741755	0.145604
HIST1H4F	18	HIST1H4F	2.89464	0.189542	0.345466	FALSE	0	0	6	14930	6.706e-05	57.3889	18	0	0.76317	0.111981
HIST1H4I	18	HIST1H4I	2.72333	0.248366	0.367198	FALSE	0	0	6	19948	9.821e-05	83.1111	18	0	0.784584	0.10628
RPS6KA5	18	RPS6KA5	2.90837	0.235294	0.343836	FALSE	0	0	6	11902	9.938e-05	62	18	0	0.761454	0.117659
HIST1H4C	18	HIST1H4C	2.88535	0.202614	0.346579	FALSE	0	0	6	13226	5.237e-05	60.5	18	0	0.764332	0.114808
CD247	18	CD247	2.99247	0.294118	0.334172	FALSE	0	0	6	16618	0.00022824	46.9444	18	0	0.750941	0.119943
COL1A1	18	COL1A1	3.16512	0.0784314	0.315944	FALSE	0	0	6	123030	0.00160575	15.5556	18	0	0.72936	0.0791158
EPB41L3	18	1	EPB41L3	2.84197	0.143791	0.351869	FALSE	0	0	6	130136	0.00160599	66.7778	18	0	0.769754	0.110648
CREB5	18	CREB5	3.14298	0.542484	0.318169	FALSE	0	0	6	5330	6.245e-05	37.2778	18	0	0.732127	0.120251
SLC3A2	18	1	2	SLC3A2	2.76583	0.0392157	0.361556	FALSE	0	0	6	201486	0.00432546	52.9444	18	0	0.779272	0.0774984
MAP1B	18	MAP1B	2.81718	0.0915033	0.354965	FALSE	0	0	5	76566	0.00110501	50.0556	18	0	0.772853	0.0772274
MDFI	18	MDFI	3.0996	0.0130719	0.322622	FALSE	0	0	6	198950	0.00316194	17.7778	18	0	0.73755	0.068
IL4R	18	IL4R	3.05622	0.235294	0.327202	FALSE	0	0	6	55340	0.00060454	38.9444	18	0	0.742973	0.120027
MARK4	18	MARK4	2.67862	0.137255	0.373327	FALSE	0	0	5	36144	0.0003088	74.9444	18	0	0.790173	0.0883629
MUC1	18	MUC1	2.69456	0.366013	0.371119	FALSE	0	0	5	22154	0.00010456	100.833	18	0	0.788181	0.117796
CRSP9	18	CRSP9	2.91235	0.222222	0.343365	FALSE	0	0	6	32750	0.0003884	49.6667	18	0	0.760956	0.0943915
PCGF4	18	PCGF4	2.91412	0.130719	0.343157	FALSE	0	0	5	19512	0.00019492	49.3889	18	0	0.760735	0.0945831
CCT6A	18	CCT6A	2.73794	0.27451	0.365238	FALSE	0	0	6	36456	0.00025885	74.5556	18	0	0.782758	0.0964306
BAX	18	BAX	2.77556	0.222222	0.360287	FALSE	0	0	6	26408	0.00027496	65.0556	18	0	0.778054	0.0951684
CCT4	18	CCT4	2.69146	0.20915	0.371546	FALSE	0	0	6	59266	0.00040285	79.7222	18	0	0.788568	0.0941486
HES1	18	HES1	2.86321	0.156863	0.349258	FALSE	0	0	6	44438	0.00054774	50.7778	18	0	0.767098	0.0885781
BRD4	18	1	BRD4	2.88048	0.124183	0.347165	FALSE	0	0	5	41570	0.00052052	51.0556	18	0	0.76494	0.0962753
TADA3L	18	TADA3L	2.77335	0.287582	0.360575	FALSE	0	0	6	32940	0.00038849	83.7778	18	0	0.778331	0.120304
A2M	18	A2M	2.97211	0.117647	0.336461	FALSE	0	0	5	101652	0.00159568	28.6111	18	0	0.753486	0.0738323
COPS3	18	COPS3	2.70075	0.333333	0.370267	FALSE	0	0	6	61548	0.00086396	77	18	0	0.787406	0.0914683
IRS4	18	IRS4	2.64055	0.320261	0.378709	FALSE	0	0	5	42376	0.0002114	100.889	18	0	0.794931	0.109543
CSF2RB	18	CSF2RB	2.88048	0.424837	0.347165	FALSE	0	0	6	13982	6.943e-05	68.1667	18	0	0.76494	0.124746
MAFK	18	MAFK	2.92784	0.339869	0.341548	FALSE	0	0	6	40544	0.00038553	64.6667	18	0	0.759019	0.122475
LEF1	18	LEF1	2.84241	0.27451	0.351814	FALSE	0	0	6	11744	9.213e-05	69.5556	18	0	0.769699	0.113283
BCL10	18	BCL10	2.76981	0.320261	0.361036	FALSE	0	0	5	9488	8.641e-05	72.3889	18	0	0.778774	0.105987
CTDP1	18	CTDP1	3.06552	0.169935	0.326209	FALSE	0	0	6	21356	0.00025741	37.5556	18	0	0.741811	0.101626
MCL1	18	MCL1	2.78575	0.183007	0.35897	FALSE	0	0	5	29356	0.00032143	66.8333	18	0	0.776782	0.0979575
VEGFA	18	1	2	VEGFA	3.1359	0.0915033	0.318888	FALSE	0	0	6	173160	0.00254951	15.2778	18	0	0.733012	0.0752961
CUL2	18	CUL2	2.88181	0.163399	0.347005	FALSE	0	0	6	37136	0.00050575	47.1667	18	0	0.764774	0.0865562
CDC25A	18	CDC25A	2.65781	0.222222	0.376249	FALSE	0	0	6	19990	0.00017854	96.4444	18	0	0.792773	0.107218
PMS1	18	PMS1	2.78929	0.130719	0.358515	FALSE	0	0	5	26032	0.00032028	54.2778	18	0	0.776339	0.0784219
MPG	18	MPG	2.89996	0.0849673	0.344833	FALSE	0	0	6	30094	0.00036485	49.7222	18	0	0.762506	0.0987778
WRN	18	WRN	2.88136	0.359477	0.347058	FALSE	0	0	6	12030	8.568e-05	63.7778	18	0	0.76483	0.107276
TIF1	18	TIF1	2.87782	0.196078	0.347485	FALSE	0	0	6	12084	7.659e-05	72.1111	18	0	0.765272	0.128441
EEF1B2	18	1	EEF1B2	2.67773	0.117647	0.37345	FALSE	0	0	6	34938	0.00021958	91.0556	18	0	0.790283	0.105003
SHBG	18	SHBG	2.9305	0.0326797	0.341239	FALSE	0	0	5	281804	0.00389935	32.6111	18	0	0.758687	0.0744186
HIST1H4D	17	HIST1H4D	2.89951	0.213235	0.344886	FALSE	0	0	6	11990	4.507e-05	59.7059	17	0	0.762561	0.118466
HIST1H4J	17	HIST1H4J	2.89951	0.213235	0.344886	FALSE	0	0	6	11990	4.507e-05	59.7059	17	0	0.762561	0.118466
MGC5178	17	MGC5178	3.08721	0.183824	0.323917	FALSE	0	0	5	13534	0.00020527	29.6471	17	0	0.739099	0.0984998
HIST1H4H	17	1	HIST1H4H	2.89951	0.213235	0.344886	FALSE	0	0	6	11990	4.507e-05	59.7059	17	0	0.762561	0.118466
PSMA4	17	PSMA4	2.76405	0.455882	0.361787	FALSE	0	0	6	11530	0.00011653	77.1176	17	0	0.779493	0.106663
EXOSC1	17	1	2	EXOSC1	3.31695	0.279412	0.301481	FALSE	0	0	6	25014	0.00042008	13.3529	17	0	0.710381	0.113625
HABP4	17	HABP4	2.83046	0.147059	0.3533	FALSE	0	0	6	24254	0.00023448	61.6471	17	0	0.771193	0.101034
PLD2	17	1	PLD2	2.81585	0.242647	0.355133	FALSE	0	0	5	20130	0.00017994	77.2941	17	0	0.773019	0.118916
E2F4	17	E2F4	2.72023	0.294118	0.367616	FALSE	0	0	5	22776	0.00019207	87.6471	17	0	0.784971	0.107207
MYH11	17	1	2	MYH11	3.00089	0.323529	0.333235	FALSE	0	0	5	33460	0.00046973	29.8824	17	0	0.749889	0.0817355
PKM2	17	PKM2	2.70385	0.161765	0.369843	FALSE	0	0	6	49788	0.00049761	81.1176	17	0	0.787019	0.100475
TPM2	17	1	TPM2	2.97521	0.257353	0.336111	FALSE	0	0	6	33216	0.00034376	35.5294	17	0	0.753099	0.0865052
EIF4A2	17	EIF4A2	2.94732	0.0661765	0.339291	FALSE	0	0	6	29136	0.00035942	35.2941	17	0	0.756585	0.08107
UBE2V2	17	UBE2V2	2.92253	0.0367647	0.342169	FALSE	0	0	6	43534	0.00059627	38.0588	17	0	0.759683	0.0827165
EPS8	17	EPS8	2.92873	0.0808824	0.341445	FALSE	0	0	6	49224	0.00061072	45.2941	17	0	0.758909	0.0945156
JTV1	17	JTV1	2.71448	0.242647	0.368395	FALSE	0	0	6	43688	0.00049122	83.9412	17	0	0.785691	0.106091
PFN1	17	PFN1	2.861	0.0735294	0.349528	FALSE	0	0	5	42762	0.00049119	52.8235	17	0	0.767375	0.0900546
APLP1	17	APLP1	2.94688	0.132353	0.339342	FALSE	0	0	6	26246	0.00038948	34.0588	17	0	0.75664	0.0807244
BID	17	1	BID	2.74546	0.191176	0.364237	FALSE	0	0	6	19218	0.00017149	70.2941	17	0	0.781817	0.0951698
ACACA	17	1	2	ACACA	2.87561	0.102941	0.347752	FALSE	0	0	6	90072	0.00126652	51.8235	17	0	0.765549	0.0892038
DVL1	17	DVL1	2.86808	0.169118	0.348665	FALSE	0	0	5	54200	0.00061007	57.7647	17	0	0.76649	0.101255
GRAP2	17	GRAP2	3.05224	0.0514706	0.327629	FALSE	0	0	5	98024	0.00114276	30.8824	17	0	0.743471	0.0995178
TOP2B	17	1	TOP2B	2.80921	0.367647	0.355972	FALSE	0	0	6	10626	7.088e-05	83.5882	17	0	0.773849	0.120618
SMAD6	17	SMAD6	2.76405	0.375	0.361787	FALSE	0	0	6	12002	0.0001012	70.4118	17	0	0.779493	0.0983404
RANBP2	17	RANBP2	2.74591	0.198529	0.364179	FALSE	0	0	6	18920	0.00019561	72.0588	17	0	0.781762	0.0961282
IARS	17	IARS	2.67463	0.235294	0.373883	FALSE	0	0	6	33944	0.00021148	97.1765	17	0	0.790671	0.109804
NCK2	17	NCK2	2.98406	0.0882353	0.335113	FALSE	0	0	5	19488	0.00024066	37.5294	17	0	0.751992	0.0960073
USF1	17	USF1	2.95485	0.227941	0.338427	FALSE	0	0	6	11250	8.836e-05	54.7647	17	0	0.755644	0.119185
MLLT3	17	MLLT3	3.02612	0.0882353	0.330456	FALSE	0	0	5	43868	0.00060435	29.5882	17	0	0.746735	0.0832631
GSK3A	17	GSK3A	2.81895	0.0882353	0.354742	FALSE	0	0	5	29444	0.00027906	62.7059	17	0	0.772632	0.103479
ARF1	17	1	ARF1	2.77689	0.0735294	0.360115	FALSE	0	0	6	108060	0.00181868	53.5294	17	0	0.777888	0.0776882
FHOD1	17	FHOD1	2.81098	0.0661765	0.355748	FALSE	0	0	5	41960	0.00059217	52.1765	17	0	0.773628	0.0814125
SLC9A3R2	17	SLC9A3R2	3.04648	0.0514706	0.328248	FALSE	0	0	6	46036	0.00077654	24.1176	17	0	0.74419	0.0770857
TNNT1	17	TNNT1	3.01062	0.154412	0.332157	FALSE	0	0	6	37596	0.00055836	36.2941	17	0	0.748672	0.0965712
IL6ST	17	IL6ST	2.66003	0.382353	0.375936	FALSE	0	0	5	50232	0.00033424	99.7647	17	0	0.792497	0.110908
STK6	17	STK6	2.84374	0.191176	0.35165	FALSE	0	0	6	45978	0.00057618	64.1765	17	0	0.769533	0.105513
TLN1	17	TLN1	2.91943	0.102941	0.342532	FALSE	0	0	6	33666	0.00041071	45.2941	17	0	0.760071	0.09
CEBPG	17	CEBPG	2.83444	0.397059	0.352803	FALSE	0	0	6	70340	0.0007728	56.7059	17	0	0.770695	0.0871023
PTPRS	17	PTPRS	2.95883	0.102941	0.337971	FALSE	0	0	6	28552	0.00038921	35.1765	17	0	0.755146	0.0842569
MAFG	17	MAFG	3.04604	0.242647	0.328295	FALSE	0	0	6	29054	0.00030966	36.4706	17	0	0.744245	0.104163
SRPRB	17	SRPRB	3.04117	0.0220588	0.328821	FALSE	0	0	6	29216	0.00026654	34.8235	17	0	0.744854	0.10094
ZFYVE9	17	ZFYVE9	2.81408	0.183824	0.355356	FALSE	0	0	6	24632	0.00023053	60.4118	17	0	0.77324	0.0975307
GTF2A1	17	GTF2A1	3.01195	0.139706	0.332011	FALSE	0	0	6	11630	0.00013415	39.5294	17	0	0.748506	0.0965457
LDOC1	17	LDOC1	2.98672	0.147059	0.334815	FALSE	0	0	6	29140	0.00039062	32.8235	17	0	0.75166	0.0829832
GTF2H1	17	GTF2H1	2.82426	0.183824	0.354075	FALSE	0	0	5	21210	0.00020348	62.5294	17	0	0.771968	0.0974869
HIST1H4E	17	HIST1H4E	2.89951	0.213235	0.344886	FALSE	0	0	6	11990	4.507e-05	59.7059	17	0	0.762561	0.118466
HSP90AB1	17	HSP90AB1	2.7583	0.161765	0.362542	FALSE	0	0	5	36148	0.00034664	75.9412	17	0	0.780212	0.104197
HIST1H4L	17	HIST1H4L	2.89951	0.213235	0.344886	FALSE	0	0	6	11990	4.507e-05	59.7059	17	0	0.762561	0.118466
OCLN	17	OCLN	2.68127	0.132353	0.372957	FALSE	0	0	6	46230	0.00037542	75.4706	17	0	0.789841	0.0882008
EPHB2	17	EPHB2	2.8703	0.183824	0.348396	FALSE	0	0	5	43372	0.00053968	59.8824	17	0	0.766213	0.105466
PLXNB1	17	1	2	PLXNB1	3.00089	0.110294	0.333235	FALSE	0	0	6	193120	0.00248328	34.5882	17	0	0.749889	0.0916955
HIST1H4K	17	HIST1H4K	2.89951	0.213235	0.344886	FALSE	0	0	6	11990	4.507e-05	59.7059	17	0	0.762561	0.118466
PICK1	17	PICK1	2.9699	0.0514706	0.336712	FALSE	0	0	6	41332	0.00061659	31.7647	17	0	0.753763	0.0798857
HIST1H4B	17	1	HIST1H4B	2.89951	0.213235	0.344886	FALSE	0	0	6	11990	4.507e-05	59.7059	17	0	0.762561	0.118466
TRIP10	17	TRIP10	2.84506	0.161765	0.351486	FALSE	0	0	5	19102	0.00015923	64.2353	17	0	0.769367	0.103773
ARHGEF11	17	ARHGEF11	2.89066	0.213235	0.345942	FALSE	0	0	5	25000	0.00024946	62.7059	17	0	0.763668	0.121996
XPO5	17	XPO5	2.71448	0.102941	0.368395	FALSE	0	0	6	44918	0.00031148	80.3529	17	0	0.785691	0.098838
CDC45L	16	CDC45L	3.04382	0.258333	0.328534	FALSE	0	0	6	14308	0.00014853	39.5625	16	0	0.744522	0.112822
PBP	16	PBP	2.81363	0.0916667	0.355412	FALSE	0	0	6	52136	0.00061231	66.25	16	0	0.773296	0.1042
ITGB5	16	ITGB5	3.03409	0.00833333	0.329589	FALSE	0	0	6	31272	0.00034253	24.6875	16	0	0.745739	0.0841431
MED25	16	1	MED25	2.93183	0.333333	0.341084	FALSE	0	0	6	11398	8.725e-05	57.75	16	0	0.758521	0.120433
GNA13	16	GNA13	2.95352	0.108333	0.338579	FALSE	0	0	5	20282	0.00021145	42.1875	16	0	0.75581	0.0988235
PLD1	16	PLD1	2.84152	0.208333	0.351924	FALSE	0	0	5	19512	0.00023807	61.9375	16	0	0.76981	0.103021
ATF7	16	ATF7	3.13767	0.591667	0.318708	FALSE	0	0	6	3066	2.349e-05	42	16	0	0.732791	0.134615
STAM2	16	STAM2	2.96193	0.15	0.337618	FALSE	0	0	6	37866	0.00038734	46.125	16	0	0.754759	0.107331
PPP2R2A	16	PPP2R2A	2.87959	0.175	0.347271	FALSE	0	0	6	20618	0.00021354	55.75	16	0	0.765051	0.100475
RPL3	16	RPL3	2.74015	0.0583333	0.364943	FALSE	0	0	6	34310	0.00026233	81.0625	16	0	0.782481	0.102838
CANX	16	CANX	2.79106	0.075	0.358287	FALSE	0	0	6	77674	0.00130723	54.1875	16	0	0.776118	0.0835598
LRP2	16	LRP2	2.97831	0.0333333	0.335761	FALSE	0	0	6	47068	0.00072781	29.5	16	0	0.752711	0.0808824
C20orf20	16	C20orf20	2.93847	0.3	0.340313	FALSE	0	0	5	15686	0.00014949	47.5	16	0	0.757691	0.102814
TCEB1	16	TCEB1	2.90527	0.108333	0.344202	FALSE	0	0	6	29492	0.0003394	44.875	16	0	0.761842	0.0964556
RP6-213H19.1	16	RP6-213H19.1	3.13103	0.625	0.319384	FALSE	0	0	6	18466	0.00025539	34.125	16	0	0.733621	0.130508
T3JAM	16	T3JAM	3.17884	0.641667	0.31458	FALSE	0	0	6	13116	6.462e-05	32.0625	16	0	0.727645	0.161932
ERBB2IP	16	ERBB2IP	2.90527	0.116667	0.344202	FALSE	0	0	6	26750	0.00030731	52.375	16	0	0.761842	0.108178
CYTH2	16	1	2	CYTH2	3.10181	0.0583333	0.322392	FALSE	0	0	6	180814	0.00277687	23.875	16	0	0.737273	0.093006
TPM1	16	TPM1	2.94954	0.3	0.339036	FALSE	0	0	6	33640	0.00037215	36.9375	16	0	0.756308	0.0882794
EIF4EBP1	16	EIF4EBP1	2.93006	0.191667	0.34129	FALSE	0	0	5	14038	0.00016842	48.625	16	0	0.758743	0.103499
DKFZp547A023	16	DKFZp547A023	3.23462	0.8	0.309156	FALSE	0	0	6	4336	1.707e-05	31.25	16	0	0.720673	0.188253
EXOSC8	16	EXOSC8	2.88092	0.3	0.347111	FALSE	0	0	6	165552	0.00317496	40.1875	16	0	0.764885	0.0746495
STK11	16	STK11	2.71005	0.1	0.368997	FALSE	0	0	6	37630	0.00041088	80.375	16	0	0.786244	0.0977134
C7orf64	16	C7orf64	3.09296	0.0166667	0.323315	FALSE	0	0	6	13070	0.00013075	24.4375	16	0	0.73838	0.09375
ARIH2	16	ARIH2	2.69898	0.075	0.37051	FALSE	0	0	6	93656	0.00124136	81.4375	16	0	0.787627	0.0981818
RAB8A	16	1	2	RAB8A	3.21824	0.0166667	0.310729	FALSE	0	0	6	95980	0.00184171	10.4375	16	0	0.72272	0.0672743
EXOSC10	16	EXOSC10	3.09916	0.233333	0.322668	FALSE	0	0	6	30300	0.00039023	26.875	16	0	0.737605	0.0919118
NUP214	16	NUP214	2.96591	0.133333	0.337164	FALSE	0	0	6	36752	0.00038274	49.5625	16	0	0.754261	0.116324
KRT15	16	KRT15	3.09739	0.075	0.322853	FALSE	0	0	6	29200	0.00046513	21.125	16	0	0.737826	0.0823413
MSX2	16	MSX2	3.03143	0.116667	0.329877	FALSE	0	0	6	19198	0.00026043	39.6875	16	0	0.746071	0.0986596
SUPT16H	16	1	SUPT16H	2.96636	0.141667	0.337114	FALSE	0	0	6	19052	0.00025312	43.1875	16	0	0.754205	0.0957684
MCRS1	16	MCRS1	2.96237	0.025	0.337567	FALSE	0	0	6	30428	0.00044783	36.5	16	0	0.754703	0.0853222
SF3B3	16	SF3B3	2.71934	0.241667	0.367736	FALSE	0	0	6	25030	0.00017771	82.5625	16	0	0.785082	0.102484
SGK1	16	1	2	SGK1	3.06684	0.025	0.326068	FALSE	0	0	6	30036	0.00041704	24.625	16	0	0.741645	0.0814201
FLJ10719	16	FLJ10719	2.7822	0.0833333	0.359427	FALSE	0	0	6	39320	0.00027356	69.4375	16	0	0.777224	0.0972711
DKFZP564O0523	16	DKFZP564O0523	3.09783	0.0333333	0.322807	FALSE	0	0	6	12374	0.00012604	23.5625	16	0	0.737771	0.0932419
VTN	16	VTN	2.97742	0.0333333	0.335861	FALSE	0	0	6	69624	0.00101536	35.3125	16	0	0.752822	0.0884224
CAST	16	1	CAST	2.93891	0.283333	0.340262	FALSE	0	0	6	83434	0.00097421	65.375	16	0	0.757636	0.138993
FLJ21168	16	FLJ21168	3.25011	0.808333	0.307682	FALSE	0	0	6	5690	2.123e-05	29.9375	16	0	0.718736	0.185947
MAP2K4	16	MAP2K4	2.99292	0.158333	0.334122	FALSE	0	0	6	37428	0.00042998	35.75	16	0	0.750885	0.102191
RRAS	16	RRAS	2.85038	0.333333	0.350831	FALSE	0	0	5	16160	0.00011632	75.4375	16	0	0.768703	0.132812
TCF4	16	TCF4	2.68792	0.325	0.372036	FALSE	0	0	6	15878	0.00010251	96.375	16	0	0.789011	0.112064
RPS11	16	RPS11	2.73794	0.116667	0.365238	FALSE	0	0	6	42006	0.0003473	85.5625	16	0	0.782758	0.108956
TGFB2	16	1	TGFB2	3.15582	0.25	0.316875	FALSE	0	0	6	101360	0.00088896	20.25	16	0	0.730522	0.094186
AP2B1	16	AP2B1	2.88313	0.108333	0.346845	FALSE	0	0	5	29114	0.00036399	48.6875	16	0	0.764608	0.0916193
SIP1	16	1	SIP1	3.09296	0.4	0.323315	FALSE	0	0	6	13634	0.0001679	30.375	16	0	0.73838	0.108036
TJP2	16	TJP2	2.81231	0.191667	0.35558	FALSE	0	0	6	66930	0.00062828	71.3125	16	0	0.773462	0.111154
MYOC	16	MYOC	2.96813	0.025	0.336913	FALSE	0	0	6	64870	0.00099743	31.0625	16	0	0.753984	0.0797697
TAF11	16	TAF11	3.07968	0.3	0.324709	FALSE	0	0	6	5164	5.741e-05	42.8125	16	0	0.74004	0.121105
DHX30	15	1	2	DHX30	2.99026	0.342857	0.334419	FALSE	0	0	6	8866	8.164e-05	52.5333	15	0	0.751217	0.127656
TAF1B	15	TAF1B	2.82382	0.390476	0.354131	FALSE	0	0	6	10622	7.485e-05	88.3333	15	0	0.772023	0.133838
BCAP31	15	BCAP31	2.73484	0.133333	0.365652	FALSE	0	0	6	25992	0.00030534	76.1333	15	0	0.783145	0.0977721
SITPEC	15	SITPEC	3.11244	0.27619	0.321291	FALSE	0	0	6	15828	0.00024769	21.7333	15	0	0.735945	0.0944444
EXOSC6	15	EXOSC6	3.29659	0.32381	0.303344	FALSE	0	0	6	16912	0.0002335	14.8	15	0	0.712926	0.110101
RPL11	15	RPL11	2.81231	0.219048	0.35558	FALSE	0	0	6	13982	9.782e-05	79	15	0	0.773462	0.118619
PPM1B	15	1	PPM1B	2.92961	0.0952381	0.341342	FALSE	0	0	6	17594	0.00022525	46	15	0	0.758798	0.102093
CBFA2T2	15	CBFA2T2	3.11642	0.228571	0.320881	FALSE	0	0	6	14940	0.0001786	36.5333	15	0	0.735447	0.121739
ARNTL	15	1	ARNTL	2.73617	0.285714	0.365475	FALSE	0	0	6	17676	0.00013979	92.4667	15	0	0.782979	0.116604
CSDA	15	1	2	CSDA	2.76538	0.0952381	0.361614	FALSE	0	0	6	62326	0.00082591	67.6	15	0	0.779327	0.0940793
SMYD2	15	SMYD2	2.8942	0.0571429	0.345519	FALSE	0	0	5	18316	0.00022482	49	15	0	0.763225	0.0967399
RYR1	15	1	2	RYR1	2.99779	0.0571429	0.333579	FALSE	0	0	5	105146	0.0016204	37.2	15	0	0.750277	0.0973545
IRF1	15	IRF1	2.76361	0.314286	0.361845	FALSE	0	0	6	7440	3.039e-05	105.667	15	0	0.779548	0.14446
PRMT5	15	PRMT5	3.07304	0.142857	0.325411	FALSE	0	0	6	18108	0.00016521	35.2	15	0	0.74087	0.112903
TH1L	15	TH1L	2.77601	0.114286	0.36023	FALSE	0	0	6	44736	0.00064339	67.4667	15	0	0.777999	0.0942884
MYO6	15	MYO6	2.6919	0.161905	0.371485	FALSE	0	0	5	42072	0.00039531	82.9333	15	0	0.788513	0.0989247
MXD1	15	MXD1	2.75343	0.295238	0.363183	FALSE	0	0	5	11860	8.22e-05	98.5333	15	0	0.780821	0.13094
RTN4	15	1	RTN4	2.88181	0.104762	0.347005	FALSE	0	0	6	20668	0.00023469	56.1333	15	0	0.764774	0.103717
GADD45A	15	GADD45A	2.93316	0.27619	0.34093	FALSE	0	0	6	8074	6.662e-05	58.0667	15	0	0.758355	0.117306
SORBS1	15	1	SORBS1	2.85392	0.133333	0.350396	FALSE	0	0	5	19904	0.00020212	55.8667	15	0	0.76826	0.0966435
BAG3	15	1	2	BAG3	2.95972	0.0476191	0.33787	FALSE	0	0	5	26738	0.00043128	39.6667	15	0	0.755035	0.0932379
MGC5309	15	MGC5309	3.01682	0.4	0.331475	FALSE	0	0	6	10270	0.00011992	40.4667	15	0	0.747897	0.110383
TKT	15	1	TKT	2.73971	0.0761905	0.365002	FALSE	0	0	5	37242	0.00026724	84.8667	15	0	0.782537	0.112561
NR4A2	15	NR4A2	2.99026	0.180952	0.334419	FALSE	0	0	6	10094	0.00010389	50.9333	15	0	0.751217	0.122249
COPS8	15	COPS8	2.95618	0.419048	0.338275	FALSE	0	0	6	28382	0.00025292	46.1333	15	0	0.755478	0.105327
SUMO3	15	1	SUMO3	2.74369	0.2	0.364472	FALSE	0	0	6	24942	0.00024551	79.6667	15	0	0.782039	0.10236
NGFR	15	NGFR	2.834	0.12381	0.352858	FALSE	0	0	5	39876	0.00049668	59.6	15	0	0.77075	0.102123
RFC2	15	RFC2	2.84551	0.304762	0.351431	FALSE	0	0	6	21722	0.00020656	53.8	15	0	0.769312	0.0882675
SCHIP1	15	1	SCHIP1	2.96193	0.0380952	0.337618	FALSE	0	0	6	21880	0.00031499	37.9333	15	0	0.754759	0.0831111
ADRB2	15	1	ADRB2	2.68969	0.314286	0.371791	FALSE	0	0	5	25024	0.00019117	89.8667	15	0	0.788789	0.108063
CD5	15	CD5	2.94599	0.266667	0.339444	FALSE	0	0	5	47306	0.00064911	56.8667	15	0	0.756751	0.124396
FAF1	15	1	FAF1	2.91279	0.133333	0.343313	FALSE	0	0	6	41352	0.00043387	51.4667	15	0	0.760901	0.100654
CAMK2G	15	CAMK2G	2.88004	0.114286	0.347218	FALSE	0	0	6	26360	0.00026196	54.6	15	0	0.764996	0.107166
FBLN1	15	1	FBLN1	3.01638	0.0761905	0.331523	FALSE	0	0	6	107296	0.00173379	29.6	15	0	0.747953	0.0800735
GDF9	15	GDF9	3.16822	0.0857143	0.315635	FALSE	0	0	6	15468	0.00022195	21.6	15	0	0.728973	0.104902
ACTR6	15	1	2	ACTR6	3.18946	0.0190476	0.313532	FALSE	0	0	6	7222	6.094e-05	21.5333	15	0	0.726317	0.112432
ATF1	15	ATF1	2.87782	0.27619	0.347485	FALSE	0	0	6	50384	0.00064651	71.8	15	0	0.765272	0.125073
TMSB4X	15	TMSB4X	2.85303	0.0571429	0.350504	FALSE	0	0	6	44476	0.00055564	57	15	0	0.768371	0.0959819
COX17	15	1	2	COX17	2.98805	0.0190476	0.334667	FALSE	0	0	6	184362	0.00305405	39.0667	15	0	0.751494	0.0977891
FLJ11773	15	FLJ11773	3.13679	0.0666667	0.318798	FALSE	0	0	5	45954	0.00049408	21.6667	15	0	0.732902	0.0957576
ACTG2	15	ACTG2	3.01948	0.361905	0.331183	FALSE	0	0	6	32416	0.00043106	34.5333	15	0	0.747565	0.100486
MAP3K4	15	1	MAP3K4	2.72554	0.104762	0.366899	FALSE	0	0	5	27374	0.00021252	74.4	15	0	0.784307	0.0966536
TIAM1	15	TIAM1	2.87694	0.2	0.347592	FALSE	0	0	5	19118	0.00017238	61.9333	15	0	0.765383	0.110042
MSX1	14	MSX1	2.93448	0.186813	0.340775	FALSE	0	0	6	23062	0.00024226	61.5714	14	0	0.758189	0.120922
DCN	14	1	DCN	3.1359	0.120879	0.318888	FALSE	0	0	6	97968	0.0014126	25.1429	14	0	0.733012	0.0985319
CBX3	14	CBX3	3.14121	0.241758	0.318348	FALSE	0	0	6	23984	0.00025575	31	14	0	0.732348	0.112768
EIF2S2	14	EIF2S2	2.88136	0.0879121	0.347058	FALSE	0	0	6	33966	0.00043508	59.2143	14	0	0.76483	0.104533
FLJ20397	14	FLJ20397	3.04294	0.010989	0.32863	FALSE	0	0	6	25502	0.00016707	42.7857	14	0	0.744633	0.120139
PRO1855	14	PRO1855	2.89287	0.043956	0.345677	FALSE	0	0	6	32484	0.00025788	67.4286	14	0	0.763391	0.126249
YBX1	14	YBX1	2.85569	0.175824	0.350178	FALSE	0	0	5	24462	0.00030624	63.2143	14	0	0.768039	0.10868
RARB	14	RARB	2.93803	0.208791	0.340365	FALSE	0	0	6	10822	8.163e-05	61.3571	14	0	0.757747	0.129994
POLA2	14	POLA2	3.13413	0.142857	0.319068	FALSE	0	0	6	17730	0.00025938	26	14	0	0.733234	0.100611
TNRC15	14	TNRC15	2.91722	0.0879121	0.342792	FALSE	0	0	6	14908	0.00016579	48	14	0	0.760347	0.0941558
MYLK	14	MYLK	2.8579	0.208791	0.349907	FALSE	0	0	5	18412	0.00020005	76.2857	14	0	0.767762	0.130605
NUP153	14	NUP153	2.94511	0.10989	0.339546	FALSE	0	0	6	16082	0.0002081	49.7857	14	0	0.756861	0.108315
FANCL	14	FANCL	3.16467	0.417582	0.315988	FALSE	0	0	6	28400	0.00033763	25.7143	14	0	0.729416	0.119601
RHEB	14	RHEB	3.00575	0.142857	0.332695	FALSE	0	0	6	15928	0.00020738	35.5714	14	0	0.749281	0.10299
LNX1	14	LNX1	3.17486	0.032967	0.314975	FALSE	0	0	7	13836	0.00023727	15.7857	14	0	0.728143	0.0885547
PPFIA2	14	1	PPFIA2	3.18637	0.296703	0.313837	FALSE	0	0	6	35700	0.00034753	23.1429	14	0	0.726704	0.107309
ARHGAP17	14	1	ARHGAP17	2.95795	0.241758	0.338072	FALSE	0	0	6	11672	0.0001001	66.6429	14	0	0.755257	0.14877
ARF4L	14	ARF4L	3.01726	0.0549451	0.331426	FALSE	0	0	6	22370	0.00025874	37.0714	14	0	0.747842	0.103878
SHANK2	14	SHANK2	2.96326	0.252747	0.337466	FALSE	0	0	5	47750	0.00051687	59.4286	14	0	0.754593	0.140155
MLL2	14	MLL2	2.9699	0.241758	0.336712	FALSE	0	0	6	12592	0.00011198	50.6429	14	0	0.753763	0.108369
GANAB	14	GANAB	2.94644	0.0659341	0.339393	FALSE	0	0	6	22820	0.00025925	49.5	14	0	0.756695	0.111617
ERCC6	14	ERCC6	2.74148	0.175824	0.364767	FALSE	0	0	6	13524	0.00012639	91.4286	14	0	0.782315	0.11623
GFAP	14	GFAP	2.85525	0.120879	0.350233	FALSE	0	0	6	19206	0.00018003	62.3571	14	0	0.768094	0.107204
ATP2A2	14	ATP2A2	2.74413	0.153846	0.364414	FALSE	0	0	6	62158	0.00107032	80.3571	14	0	0.781983	0.108202
CCNH	14	CCNH	2.8734	0.318681	0.34802	FALSE	0	0	6	26336	0.0002785	67.4286	14	0	0.765826	0.118045
SEPT2	14	2017-09-02	2.91235	0.0549451	0.343365	FALSE	0	0	6	51592	0.00072717	48.5	14	0	0.760956	0.10643
FCGR2B	14	FCGR2B	2.92607	0.461538	0.341755	FALSE	0	0	5	11252	7.743e-05	88.3571	14	0	0.759241	0.183929
MAP1LC3C	14	MAP1LC3C	3.15582	0.230769	0.316875	FALSE	0	0	5	13106	0.00015429	21.2143	14	0	0.730522	0.0974325
MYST3	14	1	MYST3	2.83533	0.252747	0.352693	FALSE	0	0	5	12374	9.886e-05	84.2857	14	0	0.770584	0.13304
COPS7A	14	COPS7A	3.00487	0.428571	0.332793	FALSE	0	0	6	12412	0.00016014	39.3571	14	0	0.749391	0.106851
PPP3CA	14	PPP3CA	2.94024	0.043956	0.340108	FALSE	0	0	5	43602	0.00054369	44.1429	14	0	0.75747	0.099026
PEBP1	14	PEBP1	2.9398	0.307692	0.34016	FALSE	0	0	6	6618	5.785e-05	61.5714	14	0	0.757525	0.131974
WEE1	14	WEE1	2.81452	0.175824	0.3553	FALSE	0	0	6	17088	0.00013267	77.8571	14	0	0.773185	0.119303
NUP98	14	NUP98	2.93537	0.164835	0.340673	FALSE	0	0	6	38422	0.0004072	58.7857	14	0	0.758079	0.120316
C20orf14	14	C20orf14	2.87561	0.164835	0.347752	FALSE	0	0	6	22300	0.00020371	63.8571	14	0	0.765549	0.110423
AP1B1	14	AP1B1	2.74325	0.131868	0.364531	FALSE	0	0	6	42970	0.00056609	82.2857	14	0	0.782094	0.105762
BIRC2	14	BIRC2	2.76627	0.241758	0.361498	FALSE	0	0	6	16436	0.0001622	84.9286	14	0	0.779216	0.113902
MAP1A	14	MAP1A	2.93183	0.153846	0.341084	FALSE	0	0	5	25376	0.00046406	44.2143	14	0	0.758521	0.0947272
KHDRBS2	14	KHDRBS2	2.99336	0.120879	0.334073	FALSE	0	0	5	78292	0.00098908	37.2143	14	0	0.75083	0.0995787
RPAP1	14	RPAP1	3.06596	0.0549451	0.326162	FALSE	0	0	6	20520	0.00031526	31.1429	14	0	0.741755	0.0930736
DAPK1	14	DAPK1	2.69544	0.186813	0.370997	FALSE	0	0	6	68964	0.00105809	100.571	14	0	0.78807	0.119758
NR2F1	14	1	NR2F1	3.00266	0.340659	0.333038	FALSE	0	0	6	5492	4.494e-05	63.0714	14	0	0.749668	0.149289
RPS6KA2	14	1	2	RPS6KA2	2.91501	0.186813	0.343052	FALSE	0	0	6	20660	0.00021709	66.7143	14	0	0.760624	0.125235
QKI	14	QKI	3.14962	0.197802	0.317498	FALSE	0	0	6	11172	0.00015316	24.7857	14	0	0.731297	0.113368
PRKAA1	14	PRKAA1	3.06507	0.10989	0.326257	FALSE	0	0	6	19792	0.00035187	30	14	0	0.741866	0.087605
POLR3D	14	POLR3D	3.07039	0.0879121	0.325692	FALSE	0	0	6	33594	0.00045095	26.8571	14	0	0.741202	0.0919427
STAMBP	14	STAMBP	2.94157	0.120879	0.339955	FALSE	0	0	5	20198	0.00023679	40.5	14	0	0.757304	0.0973712
NXF1	14	NXF1	3.10093	0.21978	0.322484	FALSE	0	0	6	9996	0.00014157	28.7143	14	0	0.737384	0.110016
MPHOSPH6	14	MPHOSPH6	2.98097	0.043956	0.335462	FALSE	0	0	5	19692	0.00019739	44.7857	14	0	0.752379	0.104525
HUWE1	14	1	HUWE1	2.71934	0.21978	0.367736	FALSE	0	0	6	18000	0.00016008	92.7143	14	0	0.785082	0.112979
EXOSC5	14	EXOSC5	3.18637	0.230769	0.313837	FALSE	0	0	6	42588	0.00051701	21.8571	14	0	0.726704	0.108399
IRF5	14	1	2	IRF5	2.87207	0.208791	0.348181	FALSE	0	0	6	29874	0.00031465	83.1429	14	0	0.765992	0.144855
NPHP1	14	1	2	NPHP1	3.08411	0.032967	0.324243	FALSE	0	0	5	154272	0.00216439	25.2857	14	0	0.739487	0.100174
BLNK	14	BLNK	3.04161	0.494505	0.328773	FALSE	0	0	6	6612	5.03e-05	55.7857	14	0	0.744799	0.158033
MAF	14	MAF	2.98628	0.362637	0.334865	FALSE	0	0	6	5628	4.423e-05	70.5714	14	0	0.751715	0.147331
FOXO3	14	1	FOXO3	2.79106	0.285714	0.358287	FALSE	0	0	5	20564	0.0001395	98.1429	14	0	0.776118	0.141823
KIAA1596	14	KIAA1596	3.36388	0.516484	0.297276	FALSE	0	0	6	62574	0.00050187	15.1429	14	0	0.704515	0.149929
PTPN13	13	1	PTPN13	2.89243	0.0769231	0.34573	FALSE	0	0	5	13098	0.00015588	53.1538	13	0	0.763446	0.106449
HSPH1	13	1	HSPH1	2.91589	0.128205	0.342948	FALSE	0	0	6	14350	0.00016452	59.8462	13	0	0.760513	0.115758
NFYB	13	NFYB	2.76361	0.346154	0.361845	FALSE	0	0	5	13536	0.00010504	104.077	13	0	0.779548	0.142948
NR1I2	13	NR1I2	2.99247	0.307692	0.334172	FALSE	0	0	6	6320	4.845e-05	61.3846	13	0	0.750941	0.150452
PPFIA3	13	PPFIA3	3.17663	0.333333	0.314799	FALSE	0	0	6	32922	0.0003455	25.8462	13	0	0.727922	0.10464
HRMT1L1	13	HRMT1L1	3.00974	0.371795	0.332255	FALSE	0	0	6	33724	0.00023668	70.7692	13	0	0.748783	0.17629
FHL3	13	FHL3	2.76715	0.179487	0.361382	FALSE	0	0	6	35122	0.0004729	71.7692	13	0	0.779106	0.10126
CHD1L	13	CHD1L	3.13811	0.346154	0.318663	FALSE	0	0	6	5172	6.024e-05	38.6154	13	0	0.732736	0.139353
ERCC3	13	ERCC3	2.9336	0.269231	0.340878	FALSE	0	0	6	6912	7.042e-05	50	13	0	0.7583	0.105994
COMMD1	13	COMMD1	2.79017	0.230769	0.358401	FALSE	0	0	5	55384	0.00092977	76.3846	13	0	0.776228	0.113048
ZRANB1	13	1	ZRANB1	3.12749	0.512821	0.319745	FALSE	0	0	6	16952	0.00018104	34.8462	13	0	0.734064	0.135588
MAPK7	13	MAPK7	2.86587	0.141026	0.348934	FALSE	0	0	6	21874	0.00024419	68.5385	13	0	0.766766	0.108033
APITD1	13	1	2	APITD1	3.42895	0.589744	0.291634	FALSE	0	0	6	47336	0.00031784	13.9231	13	0	0.696381	0.190727
NRP1	13	NRP1	3.35458	0.166667	0.2981	FALSE	0	0	6	43278	0.00062474	13	13	0	0.705677	0.107824
CLN3	13	CLN3	3.13015	0.0384615	0.319474	FALSE	0	0	6	9950	0.00012862	26.6923	13	0	0.733732	0.108074
GABARAPL1	13	GABARAPL1	3.11332	0.269231	0.3212	FALSE	0	0	5	13896	0.00012797	24.5385	13	0	0.735834	0.103977
SMARCD3	13	SMARCD3	2.90305	0.166667	0.344465	FALSE	0	0	5	16978	0.00016004	70.2308	13	0	0.762118	0.13123
PCIA1	13	PCIA1	3.16777	0.102564	0.315679	FALSE	0	0	6	11540	0.00018673	23.6923	13	0	0.729028	0.105117
MAG	13	MAG	3.14475	0.115385	0.31799	FALSE	0	0	6	79676	0.00134212	24.2308	13	0	0.731906	0.0981323
SND1	13	SND1	2.94467	0.128205	0.339597	FALSE	0	0	6	8734	0.00010123	47.7692	13	0	0.756917	0.10488
MYST1	13	MYST1	2.94865	0.205128	0.339138	FALSE	0	0	5	6890	6.402e-05	55.1538	13	0	0.756419	0.118881
GA17	13	GA17	2.97565	0.128205	0.336061	FALSE	0	0	6	15996	0.00011768	53.4615	13	0	0.753043	0.130279
BRD8	13	BRD8	2.97964	0.269231	0.335611	FALSE	0	0	6	11514	0.00011229	59.4615	13	0	0.752545	0.12662
DPF2	13	DPF2	2.97919	0.25641	0.335661	FALSE	0	0	6	7456	6.632e-05	58.0769	13	0	0.752601	0.13615
GMNN	13	1	GMNN	2.96813	0.102564	0.336913	FALSE	0	0	6	24402	0.00033036	50.3077	13	0	0.753984	0.116729
RRAS2	13	RRAS2	2.92784	0.0897436	0.341548	FALSE	0	0	6	13970	0.00013626	56.1538	13	0	0.759019	0.122638
UPF2	13	UPF2	3.20983	0.179487	0.311543	FALSE	0	0	6	10980	0.00019329	16.3846	13	0	0.723772	0.102897
EDF1	13	1	EDF1	2.90394	0.217949	0.34436	FALSE	0	0	6	9616	7.132e-05	71.9231	13	0	0.762008	0.138166
SS18L1	13	SS18L1	2.91589	0.24359	0.342948	FALSE	0	0	6	18040	0.0002086	72.0769	13	0	0.760513	0.148284
ETS2	13	ETS2	2.86277	0.512821	0.349312	FALSE	0	0	6	6452	3.07e-05	94.6923	13	0	0.767154	0.157035
PSMD5	13	PSMD5	3.26339	0.807692	0.30643	FALSE	0	0	7	454	3.68e-06	31	13	0	0.717076	0.2
LMNB1	13	LMNB1	2.71448	0.192308	0.368395	FALSE	0	0	6	50142	0.00069502	93	13	0	0.785691	0.117825
AURKB	13	AURKB	2.91722	0.102564	0.342792	FALSE	0	0	6	30996	0.00040361	50.9231	13	0	0.760347	0.107073
CDC7	13	CDC7	3.139	0.461538	0.318573	FALSE	0	0	6	4008	3.555e-05	37.2308	13	0	0.732625	0.147157
RALA	13	RALA	3.01195	0.025641	0.332011	FALSE	0	0	6	12178	0.00016406	33.9231	13	0	0.748506	0.0980883
SLMAP	13	SLMAP	3.26029	0.820513	0.306721	FALSE	0	0	6	778	3.9e-06	33.0769	13	0	0.717463	0.212032
NMI	13	NMI	2.89863	0.179487	0.344991	FALSE	0	0	6	24310	0.00028261	63.6154	13	0	0.762672	0.118776
CBFA2T3	13	1	CBFA2T3	3.05888	0.320513	0.326918	FALSE	0	0	6	12160	0.00012845	49.6923	13	0	0.742641	0.150573
TGIF	13	TGIF	2.89022	0.269231	0.345995	FALSE	0	0	6	35132	0.00045866	80.0769	13	0	0.763723	0.141959
FLJ11848	13	FLJ11848	3.31784	0.75641	0.301401	FALSE	0	0	7	128916	0.00088685	28	13	0	0.71027	0.214793
TNNI2	13	1	2	TNNI2	3.10093	0.0769231	0.322484	FALSE	0	0	6	93096	0.00145752	25.6923	13	0	0.737384	0.0971191
IFNAR1	13	IFNAR1	2.70961	0.384615	0.369057	FALSE	0	0	6	29832	0.00010644	111.769	13	0	0.786299	0.134016
CRELD1	13	1	2	CRELD1	3.11155	0.0769231	0.321383	FALSE	0	0	6	10190	0.00011989	30.2308	13	0	0.736056	0.111495
SPRY2	13	SPRY2	2.68614	0.397436	0.372281	FALSE	0	0	5	21950	0.00012135	112.846	13	0	0.789232	0.133863
PEPP-2	13	PEPP-2	3.2178	0.294872	0.310772	FALSE	0	0	6	10202	0.00014206	20.0769	13	0	0.722776	0.11236
PAG1	13	1	PAG1	3.00841	0.666667	0.332401	FALSE	0	0	6	1170	5.49e-06	76.3077	13	0	0.748949	0.198202
ARL4D	13	ARL4D	3.03276	0.0641026	0.329733	FALSE	0	0	6	20446	0.00022567	39.3846	13	0	0.745905	0.111505
RCHY1	13	RCHY1	2.6919	0.333333	0.371485	FALSE	0	0	6	28696	0.00018692	117.231	13	0	0.788513	0.136453
MAPK10	13	MAPK10	2.87826	0.153846	0.347432	FALSE	0	0	6	16618	0.00014613	75.1538	13	0	0.765217	0.128293
TRAF4	13	TRAF4	2.92342	0.0641026	0.342065	FALSE	0	0	6	18064	0.00022709	46.3077	13	0	0.759573	0.097753
PNN	13	PNN	2.87826	0.217949	0.347432	FALSE	0	0	6	18308	0.00018148	67.0769	13	0	0.765217	0.114791
AMOT	13	AMOT	2.83267	0.0512821	0.353024	FALSE	0	0	5	33260	0.00042782	54.4615	13	0	0.770916	0.0894454
GDI2	13	GDI2	2.99734	0.0512821	0.333629	FALSE	0	0	6	29288	0.00030497	50.9231	13	0	0.750332	0.140918
DMD	13	DMD	3.0571	0.0897436	0.327107	FALSE	0	0	5	23258	0.00034321	30.4615	13	0	0.742862	0.101091
CDKN2C	13	1	CDKN2C	3	0.0897436	0.333333	FALSE	0	0	6	16666	0.0001674	49.5385	13	0	0.75	0.119783
PSMA5	13	1	2	PSMA5	2.85259	0.320513	0.350559	FALSE	0	0	6	13052	0.00014516	63	13	0	0.768426	0.107115
PCBD2	13	1	PCBD2	3.08898	0.0641026	0.323732	FALSE	0	0	5	21368	0.00029931	29.1538	13	0	0.738878	0.100758
IRF3	13	IRF3	2.75919	0.294872	0.362426	FALSE	0	0	6	13098	0.00013959	91.7692	13	0	0.780102	0.124012
IPO4	13	IPO4	3.08632	0	0.32401	FALSE	0	0	6	17426	0.00015068	43.5385	13	0	0.73921	0.124746
ORC5L	13	1	ORC5L	3.20097	0.602564	0.312405	FALSE	0	0	6	2472	2.222e-05	33.7692	13	0	0.724878	0.150085
S100B	13	S100B	2.9606	0.0641026	0.337769	FALSE	0	0	6	58970	0.00081145	44.8462	13	0	0.754925	0.105999
MITF	13	MITF	2.86808	0.269231	0.348665	FALSE	0	0	6	8314	5.08e-05	79.4615	13	0	0.76649	0.130693
NEDD4L	13	NEDD4L	2.74325	0.179487	0.364531	FALSE	0	0	6	14642	0.0001479	92.2308	13	0	0.782094	0.119116
RPL5	13	RPL5	2.69721	0.205128	0.370753	FALSE	0	0	6	44442	0.00067228	107.308	13	0	0.787849	0.12717
XRN1	13	XRN1	3.16556	0.141026	0.3159	FALSE	0	0	6	17278	0.00025754	22.8462	13	0	0.729305	0.101748
ADD1	13	ADD1	2.92386	0.128205	0.342014	FALSE	0	0	6	16558	0.00018279	54.8462	13	0	0.759517	0.11506
RERE	13	RERE	2.99557	0.179487	0.333826	FALSE	0	0	6	12936	0.00013665	45.2308	13	0	0.750553	0.113452
CCND3	13	CCND3	3.03718	0.24359	0.329252	FALSE	0	0	6	7758	8.872e-05	47.2308	13	0	0.745352	0.129189
STK38	13	1	2	STK38	3.04958	0.0384615	0.327914	FALSE	0	0	6	15786	0.00019449	36.1538	13	0	0.743803	0.114152
CTNNBL1	12	CTNNBL1	2.97432	0.0909091	0.336211	FALSE	0	0	6	12820	0.00013002	47.75	12	0	0.753209	0.114109
DNAJB6	12	DNAJB6	2.73927	0.121212	0.365061	FALSE	0	0	6	21222	0.00016748	93.0833	12	0	0.782592	0.120035
FANCF	12	FANCF	3.31386	0.560606	0.301763	FALSE	0	0	6	12284	0.0001235	17.4167	12	0	0.710768	0.154762
RGS3	12	RGS3	2.87074	0.121212	0.348342	FALSE	0	0	6	18374	0.00019036	82.5	12	0	0.766158	0.146465
POLR2J	12	POLR2J	3.17973	0.333333	0.314493	FALSE	0	0	6	4454	5.34e-05	27.4167	12	0	0.727534	0.128538
RBBP8	12	1	RBBP8	2.7884	0.348485	0.358628	FALSE	0	0	6	5402	3.775e-05	93.5833	12	0	0.77645	0.132742
BUB1	12	BUB1	2.96768	0.0151515	0.336963	FALSE	0	0	6	22432	0.00031032	43.6667	12	0	0.754039	0.101261
PPP2R2C	12	PPP2R2C	3.1297	0.287879	0.319519	FALSE	0	0	6	2900	2.563e-05	38.6667	12	0	0.733787	0.154667
BMPR2	12	BMPR2	3.07039	0.166667	0.325692	FALSE	0	0	5	22612	0.0003098	33.0833	12	0	0.741202	0.118961
KIAA0179	12	KIAA0179	3.09473	0.181818	0.32313	FALSE	0	0	6	4716	6.231e-05	34.25	12	0	0.738158	0.126704
RNF4	12	RNF4	2.72244	0.272727	0.367317	FALSE	0	0	6	33170	0.0001848	122.833	12	0	0.784695	0.149695
SP100	12	1	SP100	3.18282	0.227273	0.314186	FALSE	0	0	6	23732	0.0002563	34.9167	12	0	0.727147	0.136601
PAG	12	PAG	3.01107	0.712121	0.332108	FALSE	0	0	6	1026	4.73e-06	76.1667	12	0	0.748617	0.200439
PSMF1	12	1	PSMF1	3.34174	0.136364	0.299245	FALSE	0	0	7	8918	0.0001598	18.6667	12	0	0.707282	0.133094
PPM1A	12	PPM1A	2.8942	0.257576	0.345519	FALSE	0	0	5	17368	0.00016427	72.75	12	0	0.763225	0.136023
TAF1A	12	TAF1A	2.8849	0.393939	0.346632	FALSE	0	0	6	5850	3.599e-05	77.1667	12	0	0.764387	0.139039
PRDX1	12	1	PRDX1	2.68703	0.242424	0.372158	FALSE	0	0	6	13766	0.00010011	111.667	12	0	0.789121	0.131429
CD79A	12	CD79A	3.13679	0.393939	0.318798	FALSE	0	0	6	11756	0.00017352	44.4167	12	0	0.732902	0.158901
A2BP1	12	A2BP1	3.18327	0.242424	0.314143	FALSE	0	0	6	18738	0.00028613	26.1667	12	0	0.727092	0.110993
COPG	12	COPG	2.99292	0.0909091	0.334122	FALSE	0	0	6	24304	0.00025155	48.25	12	0	0.750885	0.116788
SEPHS1	12	1	2	SEPHS1	3.31386	0.121212	0.301763	FALSE	0	0	6	97288	0.00115693	18.75	12	0	0.710768	0.113354
MAGEB2	12	MAGEB2	3.08367	0.0454546	0.324289	FALSE	0	0	6	15814	0.00019971	34.3333	12	0	0.739542	0.111111
EFNB1	12	1	2	EFNB1	3.11288	0.106061	0.321246	FALSE	0	0	6	5242	5.819e-05	27.5	12	0	0.73589	0.113796
APPL	12	APPL	2.87605	0.227273	0.347699	FALSE	0	0	5	119150	0.00183423	71.5833	12	0	0.765494	0.133929
KIAA1018	12	KIAA1018	2.96459	0.212121	0.337315	FALSE	0	0	6	10190	0.00010286	50.25	12	0	0.754427	0.117133
AHSA1	12	AHSA1	2.96237	0.0454546	0.337567	FALSE	0	0	6	17940	0.00015821	48.75	12	0	0.754703	0.11952
MYCN	12	MYCN	3.01328	0.166667	0.331864	FALSE	0	0	6	6616	5.633e-05	53.5833	12	0	0.74834	0.129338
USP45	12	USP45	3.07658	0.0757576	0.325036	FALSE	0	0	6	29066	0.00042847	34.5	12	0	0.740427	0.122744
PAI-RBP1	12	PAI-RBP1	2.70208	0.166667	0.370085	FALSE	0	0	6	44188	0.00067369	110.333	12	0	0.78724	0.128752
FUBP1	12	FUBP1	2.79416	0.0454546	0.35789	FALSE	0	0	6	28290	0.00029798	69.3333	12	0	0.77573	0.104962
TRIM23	12	TRIM23	3.11377	0.030303	0.321154	FALSE	0	0	6	19282	0.00036461	27.5	12	0	0.735779	0.0997522
GEMIN5	12	GEMIN5	3.28287	0.666667	0.304612	FALSE	0	0	6	1704	1.133e-05	27.6667	12	0	0.714641	0.172917
CDK5R1	12	CDK5R1	2.74679	0.19697	0.364061	FALSE	0	0	6	10370	6.485e-05	102.083	12	0	0.781651	0.138776
S100A1	12	1	S100A1	2.99557	0.166667	0.333826	FALSE	0	0	6	24668	0.000412	41.1667	12	0	0.750553	0.100203
CAMKK2	12	CAMKK2	2.97078	0.0454546	0.336612	FALSE	0	0	6	14982	0.00017688	45.4167	12	0	0.753652	0.112364
EGR1	12	EGR1	2.85657	0.454545	0.35007	FALSE	0	0	6	6986	3.889e-05	106.417	12	0	0.767928	0.167322
RING1	12	RING1	3.04338	0.166667	0.328582	FALSE	0	0	6	21328	0.00020454	48.5833	12	0	0.744577	0.129111
AURKA	12	AURKA	2.92253	0.151515	0.342169	FALSE	0	0	6	45164	0.00072513	58.5833	12	0	0.759683	0.121608
MAGEA11	12	MAGEA11	2.81054	0.121212	0.355804	FALSE	0	0	6	31516	0.00036593	68.25	12	0	0.773683	0.105297
FAM40B	12	FAM40B	3.55157	0.787879	0.281566	FALSE	0	0	7	270	1.34e-06	24.25	12	0	0.681054	0.319079
LRPAP1	12	LRPAP1	2.98406	0.121212	0.335113	FALSE	0	0	6	11556	0.00016208	48.4167	12	0	0.751992	0.122137
GNB2	12	GNB2	2.75343	0.121212	0.363183	FALSE	0	0	6	67880	0.00122589	89.0833	12	0	0.780821	0.118065
ORC4L	12	ORC4L	3.16246	0.530303	0.316209	FALSE	0	0	6	4666	4.386e-05	35.25	12	0	0.729692	0.153261
RAP80	12	RAP80	2.79371	0.166667	0.357946	FALSE	0	0	6	21730	0.00031734	73.75	12	0	0.775786	0.109012
RFC3	12	RFC3	2.85392	0.348485	0.350396	FALSE	0	0	6	19484	0.00016315	64.6667	12	0	0.76826	0.10905
MAP2	12	MAP2	2.85436	0.0909091	0.350341	FALSE	0	0	5	14682	0.00016832	72.3333	12	0	0.768205	0.125072
PFDN1	12	PFDN1	2.9938	0.0606061	0.334023	FALSE	0	0	6	22824	0.00030541	49.25	12	0	0.750775	0.113512
MGC5306	12	MGC5306	3.10403	0.166667	0.322162	FALSE	0	0	6	7102	0.00010083	39	12	0	0.736996	0.13242
PPP1R9B	12	PPP1R9B	2.92607	0.0909091	0.341755	FALSE	0	0	6	19716	0.00020517	57.75	12	0	0.759241	0.111979
FGFR1OP2	12	FGFR1OP2	3.46215	0.681818	0.288838	FALSE	0	0	6	2028	2.448e-05	24.5	12	0	0.692231	0.257018
FHL1	12	FHL1	2.72244	0.0909091	0.367317	FALSE	0	0	6	46754	0.00068864	97.0833	12	0	0.784695	0.121949
SH3GL3	12	SH3GL3	3.04382	0.030303	0.328534	FALSE	0	0	5	12226	0.00014696	32.8333	12	0	0.744522	0.111015
HNF1A	12	HNF1A	2.86676	0.257576	0.348826	FALSE	0	0	6	11982	7.87e-05	88.8333	12	0	0.766656	0.14927
RAP2A	12	RAP2A	3.01549	0.106061	0.331621	FALSE	0	0	5	12234	0.00015486	41.9167	12	0	0.748063	0.115189
LMOD1	12	LMOD1	3.23639	0.712121	0.308986	FALSE	0	0	6	7178	5.65e-05	23.0833	12	0	0.720452	0.151864
NR3C2	12	NR3C2	2.95263	0.212121	0.338681	FALSE	0	0	6	13286	0.00011566	64	12	0	0.755921	0.138106
MAPK8IP3	12	1	MAPK8IP3	2.99557	0.181818	0.333826	FALSE	0	0	6	9554	0.00011515	45.0833	12	0	0.750553	0.1215
BTF3	11	BTF3	2.94732	0.0363636	0.339291	FALSE	0	0	6	65858	0.00091385	62.6364	11	0	0.756585	0.145326
EGF	11	EGF	2.93625	0.363636	0.34057	FALSE	0	0	6	8870	8.785e-05	64.0909	11	0	0.757968	0.149808
GRM5	11	GRM5	3.05888	0.0909091	0.326918	FALSE	0	0	6	33286	0.00039451	48.6364	11	0	0.742641	0.153735
NOS1	11	NOS1	2.76981	0.145455	0.361036	FALSE	0	0	6	29860	0.00028419	89.6364	11	0	0.778774	0.12481
NCOA4	11	NCOA4	2.94865	0.272727	0.339138	FALSE	0	0	5	2638	1.485e-05	82.2727	11	0	0.756419	0.187837
RASD2	11	RASD2	2.96857	0.4	0.336863	FALSE	0	0	6	7838	4.852e-05	71.3636	11	0	0.753929	0.172771
THBS1	11	THBS1	3.47145	0.272727	0.288064	FALSE	0	0	6	9106	0.00017553	18.4545	11	0	0.691069	0.14018
IL7R	11	IL7R	3.11731	0.418182	0.32079	FALSE	0	0	6	9016	8.108e-05	52	11	0	0.735336	0.185714
PRKCABP	11	PRKCABP	3.06507	0.0181818	0.326257	FALSE	0	0	6	13076	0.00015837	34.0909	11	0	0.741866	0.113559
SPOP	11	1	SPOP	2.95927	0.0909091	0.337921	FALSE	0	0	6	12116	0.00013349	52.5455	11	0	0.755091	0.120025
SNRPB2	11	1	SNRPB2	3.09385	0.163636	0.323222	FALSE	0	0	6	8572	8.716e-05	46.5455	11	0	0.738269	0.147546
AIMP2	11	1	2	AIMP2	3.30279	0.0181818	0.302774	FALSE	0	0	6	9704	0.00013374	13.8182	11	0	0.712151	0.109244
RNF111	11	RNF111	2.96104	0.218182	0.337719	FALSE	0	0	6	21082	0.00010455	70.2727	11	0	0.754869	0.156951
CHFR	11	CHFR	2.78486	0.181818	0.359084	FALSE	0	0	6	22114	0.00018825	99.6364	11	0	0.776892	0.138516
PRDX2	11	PRDX2	3.15139	0.181818	0.31732	FALSE	0	0	6	9328	0.00013437	26.0909	11	0	0.731076	0.129091
PAICS	11	1	PAICS	2.99292	0.0909091	0.334122	FALSE	0	0	6	13562	0.00013774	57.8182	11	0	0.750885	0.148313
TAGLN2	11	TAGLN2	3.00664	0.127273	0.332597	FALSE	0	0	6	15580	7.244e-05	63.4545	11	0	0.74917	0.182606
NEK9	11	1	NEK9	3.16113	0.145455	0.316342	FALSE	0	0	5	20078	0.00025534	28.4545	11	0	0.729858	0.126376
COL4A1	11	COL4A1	3.18858	0.109091	0.313619	FALSE	0	0	6	53360	0.00083171	23.4545	11	0	0.726428	0.115
PTTG1	11	PTTG1	2.749	0.2	0.363768	FALSE	0	0	6	21910	0.00021562	97.1818	11	0	0.781374	0.128257
EDD	11	EDD	2.78265	0.127273	0.35937	FALSE	0	0	6	15598	0.00016713	89.5455	11	0	0.777169	0.12508
TCF12	11	TCF12	3.05755	0.363636	0.32706	FALSE	0	0	6	8314	0.00010983	60	11	0	0.742807	0.169714
GRIK2	11	GRIK2	3.16025	0.109091	0.316431	FALSE	0	0	6	67558	0.00095375	25.7273	11	0	0.729969	0.123725
ZNF408	11	ZNF408	3.18327	0.109091	0.314143	FALSE	0	0	6	12004	0.00023896	22	11	0	0.727092	0.106739
ITGB7	11	ITGB7	3.0695	0.0727273	0.325786	FALSE	0	0	6	11378	0.00012532	39.1818	11	0	0.741313	0.129091
RBM8A	11	RBM8A	3.02922	0.181818	0.330118	FALSE	0	0	6	26344	0.00032113	56	11	0	0.746348	0.138281
KRT19	11	1	KRT19	2.97964	0.127273	0.335611	FALSE	0	0	6	15918	0.00024641	45.9091	11	0	0.752545	0.11158
NOLC1	11	NOLC1	2.91811	0.109091	0.342688	FALSE	0	0	6	9144	7.173e-05	74.7273	11	0	0.760237	0.140574
XIAP	11	XIAP	2.9429	0.218182	0.339801	FALSE	0	0	5	16990	0.00015013	55.6364	11	0	0.757138	0.126898
TGFB3	11	1	2	TGFB3	3.40195	0.290909	0.293949	FALSE	0	0	6	40464	0.00027655	14.6364	11	0	0.699757	0.152462
SMC2L1	11	SMC2L1	3.00753	0.0727273	0.332499	FALSE	0	0	6	16748	0.00016794	46.5455	11	0	0.749059	0.122995
OPRD1	11	OPRD1	2.80212	0.254545	0.356872	FALSE	0	0	6	19988	0.00025403	81.1818	11	0	0.774734	0.124895
TCAP	11	1	2	TCAP	3.14564	0.109091	0.3179	FALSE	0	0	6	69566	0.00112793	26.7273	11	0	0.731795	0.114229
FKBP3	11	FKBP3	2.88358	0.4	0.346792	FALSE	0	0	6	7868	5.083e-05	95.0909	11	0	0.764553	0.159511
RPL18A	11	RPL18A	2.74945	0.109091	0.36371	FALSE	0	0	6	36004	0.00027181	105.182	11	0	0.781319	0.142346
USF2	11	1	USF2	2.95308	0.2	0.33863	FALSE	0	0	6	5924	6.339e-05	65.8182	11	0	0.755865	0.139652
RNF14	11	RNF14	2.90881	0.272727	0.343783	FALSE	0	0	6	27100	0.00012469	87.1818	11	0	0.761399	0.172277
RAD17	11	RAD17	3.12749	0.272727	0.319745	FALSE	0	0	6	4404	5.218e-05	38.1818	11	0	0.734064	0.13986
USP9X	11	USP9X	2.94511	0.127273	0.339546	FALSE	0	0	6	11080	0.00010228	56.5455	11	0	0.756861	0.127686
COBRA1	11	COBRA1	2.80655	0.418182	0.356309	FALSE	0	0	5	18726	0.00010747	114.364	11	0	0.774181	0.171581
ZNF638	11	ZNF638	3.02877	0.0545455	0.330167	FALSE	0	0	6	14702	0.00019432	41.4545	11	0	0.746403	0.119268
CD2AP	11	CD2AP	2.93537	0.581818	0.340673	FALSE	0	0	6	7668	5.485e-05	87.8182	11	0	0.758079	0.186257
L1CAM	11	L1CAM	2.97521	0.145455	0.336111	FALSE	0	0	6	16694	0.0001761	48.7273	11	0	0.753099	0.123443
HSPC142	11	HSPC142	2.86853	0.109091	0.348611	FALSE	0	0	5	112266	0.00259938	58.0909	11	0	0.766434	0.104037
PRKAA2	11	PRKAA2	3.18459	0.127273	0.314012	FALSE	0	0	6	4888	8.684e-05	20.7273	11	0	0.726926	0.106453
DKFZP564C186	11	DKFZP564C186	2.93714	0.109091	0.340467	FALSE	0	0	6	24496	0.00025035	63.0909	11	0	0.757857	0.126212
MME	11	MME	2.94467	0.127273	0.339597	FALSE	0	0	5	11524	0.00010499	63.0909	11	0	0.756917	0.135873
MAP1LC3A	11	MAP1LC3A	3.13502	0.109091	0.318978	FALSE	0	0	6	6522	9.8e-05	22.9091	11	0	0.733123	0.116084
GEMIN6	11	GEMIN6	3.36698	0.636364	0.297002	FALSE	0	0	6	1204	9.03e-06	23.5455	11	0	0.704128	0.216013
MPP6	11	MPP6	3.15538	0.345455	0.316919	FALSE	0	0	5	18958	0.00024885	27.6364	11	0	0.730578	0.125681
MYOZ1	11	1	2	MYOZ1	3.2355	0.127273	0.309071	FALSE	0	0	6	19922	0.00024337	20.9091	11	0	0.720562	0.124115
CTCF	11	CTCF	2.97477	0.163636	0.336161	FALSE	0	0	6	4406	3.171e-05	64.8182	11	0	0.753154	0.144278
TSC22D3	11	TSC22D3	2.71669	0.4	0.368095	FALSE	0	0	6	15134	9.278e-05	132.545	11	0	0.785414	0.157684
MYL9	11	MYL9	3.0633	0.4	0.326445	FALSE	0	0	6	21124	0.00028569	37.7273	11	0	0.742087	0.120433
KIAA0683	11	KIAA0683	3.03453	0.0727273	0.32954	FALSE	0	0	6	8130	8.64e-05	47.9091	11	0	0.745684	0.129056
CBFB	11	CBFB	3.07039	0.109091	0.325692	FALSE	0	0	6	11744	0.00018243	36.5455	11	0	0.741202	0.119506
CLTA	11	1	2	CLTA	2.9305	0.181818	0.341239	FALSE	0	0	6	12054	0.00015645	54.0909	11	0	0.758687	0.120805
GNB1	11	GNB1	3.11111	0.0727273	0.321429	FALSE	0	0	6	66398	0.00115601	29.4545	11	0	0.736111	0.113369
HIP1	11	HIP1	3.17353	0.0909091	0.315107	FALSE	0	0	6	5066	7.093e-05	24	11	0	0.728309	0.126588
ZNF212	11	1	ZNF212	3.16113	0.2	0.316342	FALSE	0	0	5	23804	0.0002586	24.5455	11	0	0.729858	0.11645
MAP2K7	11	MAP2K7	3.02169	0.236364	0.330941	FALSE	0	0	6	18372	0.00018071	38.9091	11	0	0.747289	0.119706
RB1CC1	11	RB1CC1	2.93094	0.0545455	0.341187	FALSE	0	0	5	16936	0.00021613	51	11	0	0.758632	0.108934
NACA	11	NACA	2.77069	0.163636	0.36092	FALSE	0	0	6	26246	0.00033782	94.6364	11	0	0.778663	0.126663
BAIAP2	11	BAIAP2	2.99956	0.0909091	0.333383	FALSE	0	0	5	64364	0.0010149	44	11	0	0.750055	0.118728
TUFM	11	TUFM	2.77379	0.127273	0.360517	FALSE	0	0	6	14444	8.652e-05	98.1818	11	0	0.778276	0.140401
TACC1	11	1	2	TACC1	3.23816	0.0181818	0.308818	FALSE	0	0	6	50656	0.00084504	16.2727	11	0	0.72023	0.108074
NUP62	11	NUP62	3.17131	0.127273	0.315327	FALSE	0	0	6	6926	9.885e-05	28.0909	11	0	0.728586	0.132035
ARHGAP1	11	1	ARHGAP1	3.03054	0.2	0.329974	FALSE	0	0	6	30472	0.00028525	53.0909	11	0	0.746182	0.146059
RBPMS	11	RBPMS	3.166	0.381818	0.315856	FALSE	0	0	6	7040	9.638e-05	26.3636	11	0	0.72925	0.126482
MAST1	11	MAST1	3.09429	0.345455	0.323176	FALSE	0	0	6	14292	0.00017952	30.4545	11	0	0.738214	0.123933
MAPKAPK5	11	MAPKAPK5	2.73263	0.290909	0.365948	FALSE	0	0	6	14734	0.00015247	105.909	11	0	0.783422	0.134513
JUB	11	JUB	2.92297	0.0909091	0.342117	FALSE	0	0	5	14420	0.00018397	55.4545	11	0	0.759628	0.110847
POLA	11	POLA	2.97388	0.163636	0.336261	FALSE	0	0	6	21556	0.00020634	63.2727	11	0	0.753265	0.137453
TRIM25	11	TRIM25	2.79504	0.218182	0.357776	FALSE	0	0	6	25688	0.00025541	91.9091	11	0	0.77562	0.131792
S100P	11	1	2	S100P	3.25852	0.0727273	0.306888	FALSE	0	0	6	78454	0.00113589	15.2727	11	0	0.717685	0.123759
BATF	11	BATF	3.1722	0.727273	0.315239	FALSE	0	0	6	610	3.53e-06	50.7273	11	0	0.728475	0.178617
RNF5	11	RNF5	2.8371	0.327273	0.352473	FALSE	0	0	6	52066	0.00067375	94.3636	11	0	0.770363	0.152993
TCF1	11	TCF1	2.87649	0.2	0.347645	FALSE	0	0	6	19828	0.00019001	86.7273	11	0	0.765438	0.152747
RPS27	10	RPS27	2.81054	0.2	0.355804	FALSE	0	0	6	53278	0.00090185	101.9	10	0	0.773683	0.154795
RNF32	10	RNF32	3.19389	0.377778	0.313098	FALSE	0	0	6	5178	6.887e-05	23.7	10	0	0.725764	0.14303
ATXN10	10	ATXN10	3.25675	0	0.307055	FALSE	0	0	6	8102	8.161e-05	28.7	10	0	0.717906	0.156497
FOSL2	10	FOSL2	3.21957	0.733333	0.310601	FALSE	0	0	6	418	3.44e-06	44.4	10	0	0.722554	0.181224
EXOSC4	10	EXOSC4	3.32891	0.511111	0.300399	FALSE	0	0	6	8514	0.00012913	17.8	10	0	0.708887	0.158559
CDC34	10	CDC34	3.0571	0.111111	0.327107	FALSE	0	0	6	70640	0.00099802	41.8	10	0	0.742862	0.127385
TNFRSF10A	10	TNFRSF10A	2.80301	0.2	0.356759	FALSE	0	0	5	80762	0.00111437	80.6	10	0	0.774624	0.127822
CDK2AP1	10	CDK2AP1	3.08455	0.177778	0.324196	FALSE	0	0	6	67114	0.00091508	53.3	10	0	0.739431	0.153779
TNNI3	10	TNNI3	3.05091	0.2	0.327771	FALSE	0	0	6	36000	0.0005202	38.6	10	0	0.743637	0.120376
PIP5K1C	10	1	2	PIP5K1C	3.22488	0.0222222	0.310089	FALSE	0	0	6	58438	0.00103541	16.9	10	0	0.72189	0.111034
USP25	10	USP25	3.112	0.0222222	0.321337	FALSE	0	0	6	65182	0.00095789	27.4	10	0	0.736	0.109917
HSPC121	10	HSPC121	2.84816	0.0666667	0.351104	FALSE	0	0	5	26528	0.00024052	77.7	10	0	0.76898	0.128286
FBLN2	10	FBLN2	3.3776	0.133333	0.296068	FALSE	0	0	6	24136	0.00039647	17.1	10	0	0.7028	0.12803
CCL2	10	1	CCL2	3.21337	0.288889	0.3112	FALSE	0	0	6	48114	0.0006655	33.7	10	0	0.723329	0.162136
ITGA6	10	ITGA6	3.05888	0.2	0.326918	FALSE	0	0	6	28018	0.00048094	41	10	0	0.742641	0.123193
AGTR1	10	AGTR1	2.99026	0.222222	0.334419	FALSE	0	0	5	7356	7.398e-05	58.9	10	0	0.751217	0.151938
PNKP	10	PNKP	3.03763	0.0444444	0.329204	FALSE	0	0	6	10164	0.00013096	44.6	10	0	0.745297	0.129412
CARD11	10	CARD11	2.8216	0.4	0.354409	FALSE	0	0	6	4802	3.346e-05	99.6	10	0	0.7723	0.15685
SHANK1	10	SHANK1	3.14166	0.0222222	0.318304	FALSE	0	0	5	19428	0.00024733	23.1	10	0	0.732293	0.117989
IGFBP3	10	IGFBP3	3.02346	0.155556	0.330747	FALSE	0	0	6	36076	0.00055508	42.4	10	0	0.747067	0.118487
PNRC2	10	PNRC2	3.06684	0.244444	0.326068	FALSE	0	0	6	5266	3.464e-05	67.1	10	0	0.741645	0.203343
CDH2	10	CDH2	2.96326	0.244444	0.337466	FALSE	0	0	6	13254	0.00015162	60	10	0	0.754593	0.12848
RPS7	10	RPS7	2.70695	0.288889	0.369419	FALSE	0	0	6	20194	0.00015004	126	10	0	0.786631	0.149289
SNAI1	10	SNAI1	2.75653	0.333333	0.362775	FALSE	0	0	6	10936	0.00013417	121.7	10	0	0.780434	0.163747
STK3	10	STK3	3.10314	0.244444	0.322254	FALSE	0	0	5	7804	0.00012427	34.5	10	0	0.737107	0.131418
EPB41L2	10	EPB41L2	2.94334	0.177778	0.33975	FALSE	0	0	6	12760	0.00010657	80.1	10	0	0.757083	0.161616
SRPK1	10	SRPK1	2.98495	0.288889	0.335014	FALSE	0	0	6	5194	4.855e-05	58.2	10	0	0.751881	0.149871
CXXC1	10	CXXC1	3.22444	0.222222	0.310132	FALSE	0	0	6	2428	2.68e-05	33.2	10	0	0.721946	0.146429
LYST	10	LYST	2.93006	0.0222222	0.34129	FALSE	0	0	6	11754	0.0001313	66.3	10	0	0.758743	0.139659
GOLGA2	10	GOLGA2	3.14741	0.0888889	0.317722	FALSE	0	0	6	25498	0.00044214	27.8	10	0	0.731574	0.121778
NPAS2	10	NPAS2	3.00133	0.488889	0.333186	FALSE	0	0	6	1442	5.72e-06	85.4	10	0	0.749834	0.20678
GYS1	10	GYS1	3.04338	0.0888889	0.328582	FALSE	0	0	5	11386	0.00016379	43.6	10	0	0.744577	0.125507
PRKG1	10	PRKG1	3.01284	0.0222222	0.331913	FALSE	0	0	6	10606	0.00015555	39.1	10	0	0.748395	0.116768
TOP3A	10	TOP3A	3.1784	0.422222	0.314624	FALSE	0	0	6	15448	0.00015677	32.2	10	0	0.7277	0.143304
MYO1C	10	MYO1C	2.93581	0	0.340621	FALSE	0	0	5	22908	0.00021873	58.1	10	0	0.758023	0.125495
RAB1B	10	1	2	RAB1B	3.18858	0.0444444	0.313619	FALSE	0	0	6	151702	0.00280881	24.5	10	0	0.726428	0.114354
RFX1	10	RFX1	2.96414	0.111111	0.337366	FALSE	0	0	6	12602	0.00012728	58.2	10	0	0.754482	0.131136
FGG	10	1	2	FGG	3.61089	0.222222	0.27694	FALSE	0	0	6	56136	0.00075165	9.2	10	0	0.673639	0.135294
C7orf20	10	C7orf20	2.83665	0.133333	0.352528	FALSE	0	0	6	9016	8.149e-05	83.5	10	0	0.770418	0.132536
AK2	10	1	AK2	2.99469	0	0.333925	FALSE	0	0	6	21090	0.00016111	64.1	10	0	0.750664	0.175278
MLC1SA	10	MLC1SA	3.40859	0.488889	0.293377	FALSE	0	0	6	3122	4.193e-05	17	10	0	0.698927	0.193103
DTX1	10	DTX1	2.92297	0.244444	0.342117	FALSE	0	0	5	32486	0.00028105	72.9	10	0	0.759628	0.146092
MYCBP2	10	1	MYCBP2	2.75299	0.244444	0.363242	FALSE	0	0	6	24836	0.00017325	120.7	10	0	0.780876	0.157311
HCLS1	10	1	HCLS1	2.87251	0.177778	0.348128	FALSE	0	0	5	19218	0.00024403	73.9	10	0	0.765936	0.131317
FSHR	10	FSHR	2.83355	0.222222	0.352914	FALSE	0	0	6	7246	6.145e-05	93.8	10	0	0.770806	0.152195
PAX5	10	1	PAX5	3.00266	0.333333	0.333038	FALSE	0	0	6	3458	2.546e-05	76	10	0	0.749668	0.182014
POU2F2	10	POU2F2	2.99646	0.288889	0.333727	FALSE	0	0	6	1792	1.221e-05	78.1	10	0	0.750443	0.189104
RP11-506K6.1	10	RP11-506K6.1	2.94378	0.133333	0.339699	FALSE	0	0	6	10484	9.87e-05	68	10	0	0.757027	0.145591
SF3A3	10	SF3A3	3.09872	0.177778	0.322714	FALSE	0	0	6	27564	0.00032197	47.3	10	0	0.73766	0.135158
NRAS	10	NRAS	3.00664	0.111111	0.332597	FALSE	0	0	6	7708	8.376e-05	47.6	10	0	0.74917	0.134473
LMO3	10	LMO3	3.38822	0.0444444	0.29514	FALSE	0	0	7	31812	0.00050069	17.3	10	0	0.701472	0.139496
WDR77	10	WDR77	3.25144	0.377778	0.307556	FALSE	0	0	6	4448	3.503e-05	32.5	10	0	0.71857	0.191716
HSPC128	10	HSPC128	3.01328	0.0222222	0.331864	FALSE	0	0	6	27004	0.00025971	51.7	10	0	0.74834	0.139835
DARS	10	DARS	2.73174	0.177778	0.366067	FALSE	0	0	5	19162	0.00019571	105.8	10	0	0.783533	0.142318
MAP2K2	10	MAP2K2	2.9668	0.111111	0.337064	FALSE	0	0	6	10210	0.00011329	58.8	10	0	0.75415	0.143243
TSHR	10	TSHR	3.05843	0.133333	0.326965	FALSE	0	0	6	8866	0.00011242	47.3	10	0	0.742696	0.153094
GATA4	10	GATA4	2.973	0.2	0.336361	FALSE	0	0	6	5746	4.643e-05	81.1	10	0	0.753375	0.170675
TLE2	10	1	TLE2	3.21116	0.222222	0.311414	FALSE	0	0	6	3350	4.227e-05	29.1	10	0	0.723606	0.13662
AKAP8L	10	1	AKAP8L	2.76051	0.155556	0.362251	FALSE	0	0	6	17586	0.00015931	98	10	0	0.779936	0.131494
SNCAIP	10	SNCAIP	2.82382	0.177778	0.354131	FALSE	0	0	6	17390	0.00018324	84.5	10	0	0.772023	0.133228
POLR3A	10	1	POLR3A	3.13502	0.2	0.318978	FALSE	0	0	6	16710	0.00019076	36.8	10	0	0.733123	0.132727
NEF3	10	NEF3	2.95839	0.222222	0.338022	FALSE	0	0	6	7724	6.785e-05	76.5	10	0	0.755201	0.150593
NSF	10	NSF	3.16202	0.0444444	0.316254	FALSE	0	0	5	11546	0.00022311	27.9	10	0	0.729748	0.119737
MTHFD1L	10	MTHFD1L	3.07171	0.0222222	0.325551	FALSE	0	0	6	14608	0.00010243	49	10	0	0.741036	0.141349
FKBP1A	10	FKBP1A	3.04692	0.0666667	0.3282	FALSE	0	0	6	14766	0.00022158	36	10	0	0.744135	0.123776
PQBP1	10	PQBP1	3.09827	0	0.32276	FALSE	0	0	6	18282	0.00031265	36.6	10	0	0.737716	0.131852
STRA13	10	STRA13	2.75122	0.377778	0.363475	FALSE	0	0	6	64922	0.00076811	115.1	10	0	0.781098	0.151447
EIF6	10	EIF6	3.16556	0.0666667	0.3159	FALSE	0	0	6	6876	9.097e-05	27.2	10	0	0.729305	0.122936
TRIP12	10	TRIP12	3.03143	0.0888889	0.329877	FALSE	0	0	6	8240	9.657e-05	51.6	10	0	0.746071	0.129293
CD22	10	CD22	3.06729	0.733333	0.326021	FALSE	0	0	6	674	3.04e-06	74.6	10	0	0.741589	0.218768
KLHL20	10	KLHL20	3.01328	0.0222222	0.331864	FALSE	0	0	6	22300	0.00025874	44.5	10	0	0.74834	0.128529
LRSAM1	9	1	LRSAM1	3.00354	0.0277778	0.33294	FALSE	0	0	5	22082	0.00024443	56.1111	9	0	0.749557	0.151598
DOT1L	9	DOT1L	3.19566	0.277778	0.312924	FALSE	0	0	5	2456	3.033e-05	31.5556	9	0	0.725542	0.154684
MGC15730	9	MGC15730	3.2054	0	0.311973	FALSE	0	0	6	42440	0.00044102	19.6667	9	0	0.724325	0.139303
MOBK1B	9	MOBK1B	3.08234	0	0.324429	FALSE	0	0	6	17116	0.0002481	39.8889	9	0	0.739708	0.131381
SPTA1	9	SPTA1	3.0571	0.111111	0.327107	FALSE	0	0	5	6528	8.007e-05	44.2222	9	0	0.742862	0.137583
TU3A	9	TU3A	3.17309	0.111111	0.315151	FALSE	0	0	6	4948	8.678e-05	26.3333	9	0	0.728364	0.134715
IGSF21	9	1	IGSF21	3.2054	0	0.311973	FALSE	0	0	6	42440	0.00044102	19.6667	9	0	0.724325	0.139303
TRIM55	9	TRIM55	3.16866	0.194444	0.315591	FALSE	0	0	6	19200	0.0002992	44.4444	9	0	0.728918	0.170085
RBP1	9	RBP1	3.11377	0.527778	0.321154	FALSE	0	0	6	3682	4.231e-05	62.2222	9	0	0.735779	0.207037
RPS26	9	1	2	RPS26	3.3143	0.0277778	0.301723	FALSE	0	0	6	138238	0.00179618	22.3333	9	0	0.710713	0.139971
UCHL3	9	1	2	UCHL3	3.13634	0.166667	0.318843	FALSE	0	0	6	10134	0.0001504	40.4444	9	0	0.732957	0.162186
RAC3	9	RAC3	3.04205	0.111111	0.328725	FALSE	0	0	6	3650	2.826e-05	67.6667	9	0	0.744743	0.195659
G1P2	9	G1P2	3.18902	0.138889	0.313576	FALSE	0	0	6	4570	7.895e-05	31.1111	9	0	0.726372	0.131054
AMFR	9	AMFR	2.85879	0.333333	0.349799	FALSE	0	0	6	10580	0.00013423	89.1111	9	0	0.767652	0.149515
MRLC2	9	1	MRLC2	3.47942	0.611111	0.287405	FALSE	0	0	6	1486	1.53e-05	16.2222	9	0	0.690073	0.240464
SERTAD1	9	SERTAD1	3.05666	0.138889	0.327154	FALSE	0	0	6	8980	0.00012492	50.4444	9	0	0.742917	0.152778
SLC2A4	9	SLC2A4	3.01771	0.0277778	0.331377	FALSE	0	0	6	5744	6.348e-05	45.8889	9	0	0.747787	0.134259
RORB	9	RORB	3.18327	0.0277778	0.314143	FALSE	0	0	6	6302	5.517e-05	45	9	0	0.727092	0.184259
APG4C	9	APG4C	3.18814	0.277778	0.313663	FALSE	0	0	6	12736	0.00016984	35.4444	9	0	0.726483	0.165094
MAGI1	9	MAGI1	3.12705	0.0833333	0.31979	FALSE	0	0	6	11002	0.00015529	30.7778	9	0	0.734119	0.129709
XPA	9	XPA	3.0633	0.222222	0.326445	FALSE	0	0	6	2112	1.691e-05	53.3333	9	0	0.742087	0.156863
HMGN1	9	HMGN1	2.91456	0.0555556	0.343104	FALSE	0	0	6	8588	9.202e-05	71.1111	9	0	0.760679	0.140829
FGA	9	1	FGA	3.39177	0.25	0.294832	FALSE	0	0	6	21470	0.00027354	13.3333	9	0	0.701029	0.14372
EXOSC7	9	EXOSC7	3.65294	0.75	0.273752	FALSE	0	0	6	1662	2.122e-05	12.3333	9	0	0.668382	0.256944
PPP1R12A	9	PPP1R12A	2.98008	0.0555556	0.335562	FALSE	0	0	5	12138	0.00016916	57.3333	9	0	0.75249	0.129081
PPFIBP1	9	1	PPFIBP1	3.05932	0.222222	0.32687	FALSE	0	0	6	12652	0.0001368	65.8889	9	0	0.742585	0.194035
MT2A	9	1	2	MT2A	3.57149	0	0.279995	FALSE	0	0	6	321926	0.00416563	6.77778	9	0	0.678564	0.115556
DPM1	9	1	DPM1	3.24834	0	0.30785	FALSE	0	0	6	8564	5.701e-05	36.3333	9	0	0.718958	0.174056
SDCBP	9	1	SDCBP	2.76848	0.166667	0.361209	FALSE	0	0	6	30338	0.0004029	99.5556	9	0	0.77894	0.141342
MYOCD	9	1	2	MYOCD	3.07393	0.305556	0.325317	FALSE	0	0	6	119096	0.00150224	54.3333	9	0	0.740759	0.17491
B2M	9	B2M	3.15936	0.111111	0.31652	FALSE	0	0	5	38660	0.00080903	29.1111	9	0	0.73008	0.120874
ASK	9	ASK	3.23595	0.555556	0.309029	FALSE	0	0	6	1798	1.693e-05	33.8889	9	0	0.720507	0.195247
DNMBP	9	DNMBP	3.13059	0.0555556	0.319429	FALSE	0	0	5	6490	8.428e-05	35	9	0	0.733676	0.144866
PHYHIP	9	PHYHIP	3.15803	0	0.316653	FALSE	0	0	6	16006	0.00022799	31.4444	9	0	0.730246	0.135913
EXOSC9	9	EXOSC9	3.30235	0.555556	0.302815	FALSE	0	0	6	11328	0.00017476	27.4444	9	0	0.712207	0.158638
SIVA	9	1	2	SIVA	3.06463	0.111111	0.326304	FALSE	0	0	6	131334	0.00209281	48.7778	9	0	0.741921	0.143519
WWTR1	9	WWTR1	3.01903	0.138889	0.331232	FALSE	0	0	6	18840	0.00021307	57.4444	9	0	0.747621	0.158465
RNF12	9	RNF12	2.78707	0.25	0.358799	FALSE	0	0	6	14626	9.28e-05	119.222	9	0	0.776616	0.163912
EPHA3	9	1	EPHA3	2.88623	0.25	0.346472	FALSE	0	0	6	17314	0.00028121	99.1111	9	0	0.764221	0.180454
KIF23	9	1	KIF23	2.7521	0.361111	0.363359	FALSE	0	0	6	16706	9.724e-05	131.444	9	0	0.780987	0.174182
LASP1	9	LASP1	3.11332	0.0833333	0.3212	FALSE	0	0	6	13084	0.00025054	39.5556	9	0	0.735834	0.136276
PTPRA	9	1	PTPRA	2.95883	0.333333	0.337971	FALSE	0	0	5	9178	0.00012646	81.5556	9	0	0.755146	0.180187
NUP205	9	NUP205	2.82957	0.25	0.353411	FALSE	0	0	6	13038	9.277e-05	92.5556	9	0	0.771304	0.141739
POLI	9	POLI	3.14343	0.166667	0.318124	FALSE	0	0	6	11808	0.00018577	38.4444	9	0	0.732072	0.159664
CCNDBP1	9	1	2	CCNDBP1	3.29438	0	0.303547	FALSE	0	0	6	110130	0.00185383	15.2222	9	0	0.713203	0.116576
SIRT6	9	SIRT6	3.09119	0.111111	0.3235	FALSE	0	0	6	15150	0.00021559	49.8889	9	0	0.738601	0.16933
BIRC3	9	BIRC3	2.81762	0.194444	0.35491	FALSE	0	0	6	9260	9.294e-05	108.444	9	0	0.772798	0.16331
EIF3E	9	EIF3E	3.27933	0.0833333	0.304941	FALSE	0	0	6	5608	8.099e-05	23.6667	9	0	0.715084	0.138554
EP400	9	EP400	2.97211	0.416667	0.336461	FALSE	0	0	6	7230	6.433e-05	67.2222	9	0	0.753486	0.150811
TPI1	9	TPI1	2.71979	0.305556	0.367676	FALSE	0	0	6	10600	8.579e-05	126.556	9	0	0.785027	0.159451
RNF10	9	RNF10	2.91058	0.0833333	0.343574	FALSE	0	0	5	35600	0.00022111	79	9	0	0.761178	0.15944
MACF1	9	1	MACF1	2.99513	0.0277778	0.333875	FALSE	0	0	6	9936	0.00010747	54.2222	9	0	0.750609	0.132288
PRIC285	9	1	2	PRIC285	3.11731	0.777778	0.32079	FALSE	0	0	6	468	2.28e-06	67.4444	9	0	0.735336	0.226324
PLEKHA5	9	PLEKHA5	3.08367	0.0833333	0.324289	FALSE	0	0	6	10500	0.00014878	36.8889	9	0	0.739542	0.133987
NR2F6	9	NR2F6	3.08455	0.388889	0.324196	FALSE	0	0	6	4026	3.657e-05	68.8889	9	0	0.739431	0.21259
E2F3	9	E2F3	3.05091	0.166667	0.327771	FALSE	0	0	6	6680	7.458e-05	58.8889	9	0	0.743637	0.16371
HNRPAB	9	HNRPAB	3.23595	0.166667	0.309029	FALSE	0	0	6	18366	0.00027809	31.4444	9	0	0.720507	0.139881
VARS2	9	VARS2	2.8849	0.111111	0.346632	FALSE	0	0	6	15678	8.987e-05	87.4444	9	0	0.764387	0.16688
ADAM15	9	1	ADAM15	2.99469	0.305556	0.333925	FALSE	0	0	6	8616	5.309e-05	90	9	0	0.750664	0.231984
POLR3H	9	POLR3H	3.20673	0.277778	0.311844	FALSE	0	0	6	13618	0.00016886	31.6667	9	0	0.724159	0.156667
MYD88	9	MYD88	3.15671	0.0277778	0.316786	FALSE	0	0	5	4974	6.925e-05	24.2222	9	0	0.730412	0.13171
DLX4	9	1	DLX4	2.95883	0.638889	0.337971	FALSE	0	0	5	17846	0.00015057	106.778	9	0	0.755146	0.234949
ZNFN1A4	9	ZNFN1A4	3.07747	0.361111	0.324942	FALSE	0	0	6	4264	4.366e-05	53.3333	9	0	0.740317	0.182268
SHMT2	9	SHMT2	3.12351	0.0555556	0.320153	FALSE	0	0	6	9234	0.00012237	48	9	0	0.734562	0.160829
CD3D	9	1	CD3D	2.84816	0.194444	0.351104	FALSE	0	0	6	82170	0.00168523	84	9	0	0.76898	0.141227
DAPK3	9	DAPK3	2.80876	0.194444	0.356028	FALSE	0	0	5	9912	0.00012207	93.8889	9	0	0.773904	0.141399
AFAP1	9	AFAP1	3.02612	0.333333	0.330456	FALSE	0	0	6	4538	4.195e-05	77.4444	9	0	0.746735	0.182991
CD79B	9	CD79B	3.19433	0.722222	0.313054	FALSE	0	0	6	398	2.21e-06	55.2222	9	0	0.725708	0.226321
RGS7	9	RGS7	2.98893	0.0277778	0.334568	FALSE	0	0	5	14358	0.00016677	64.2222	9	0	0.751383	0.152145
GDI1	9	GDI1	3.01638	0	0.331523	FALSE	0	0	5	15164	0.00026786	47.4444	9	0	0.747953	0.131571
PPP2R5C	9	1	PPP2R5C	2.89996	0.361111	0.344833	FALSE	0	0	6	6186	4.771e-05	86.7778	9	0	0.762506	0.159812
TOLLIP	9	TOLLIP	3.25631	0.388889	0.307096	FALSE	0	0	6	4100	6.659e-05	24.5556	9	0	0.717961	0.148603
WT1	9	WT1	2.91191	0.138889	0.343417	FALSE	0	0	6	10790	0.00013632	82	9	0	0.761012	0.151515
MGC32020	9	MGC32020	3.20983	0.777778	0.311543	FALSE	0	0	6	19186	0.00030912	32.3333	9	0	0.723772	0.157182
TRIM39	8	TRIM39	3.00708	0.392857	0.332548	FALSE	0	0	6	37336	0.00024385	93.125	8	0	0.749115	0.232232
PAPOLA	8	PAPOLA	2.97521	0.357143	0.336111	FALSE	0	0	6	3194	2.121e-05	86.625	8	0	0.753099	0.19265
PRPF3	8	PRPF3	3.28066	0.142857	0.304817	FALSE	0	0	6	6592	6.779e-05	40.75	8	0	0.714918	0.198529
MAP4K3	8	MAP4K3	2.78884	0.285714	0.358571	FALSE	0	0	5	5670	3.711e-05	127.75	8	0	0.776394	0.193579
STARD13	8	STARD13	3.13236	0.107143	0.319248	FALSE	0	0	6	21534	0.00021223	39.25	8	0	0.733455	0.172222
GADD45GIP1	8	GADD45GIP1	2.99602	0.107143	0.333777	FALSE	0	0	6	11146	0.00013126	67.375	8	0	0.750498	0.161836
FANCB	8	FANCB	3.60115	1	0.277689	FALSE	0	0	6	0	0	16.625	8	0	0.674856	0.302273
BAI2	8	1	2	BAI2	3.73882	0	0.267464	FALSE	0	0	6	11848	0.0001739	7.625	8	0	0.657647	0.161585
HLA-C	8	HLA-C	2.89332	0.142857	0.345624	FALSE	0	0	6	36784	0.00069178	71.375	8	0	0.763336	0.136516
HNF4G	8	HNF4G	3.20274	0.0714286	0.312232	FALSE	0	0	6	4324	4.581e-05	38.625	8	0	0.724657	0.187808
PPFIBP2	8	1	PPFIBP2	3.19788	0.142857	0.312708	FALSE	0	0	6	5026	6.833e-05	32.375	8	0	0.725266	0.157797
ITGA2	8	ITGA2	3.24436	0.0714286	0.308228	FALSE	0	0	5	18748	0.00038872	26.875	8	0	0.719456	0.139628
CYFIP1	8	1	CYFIP1	3.02966	0.142857	0.33007	FALSE	0	0	5	7462	6.625e-05	59	8	0	0.746293	0.163649
SLC25A10	8	SLC25A10	3.20806	0	0.311715	FALSE	0	0	6	10012	0.0001663	36.375	8	0	0.723993	0.152478
NRBF2	8	NRBF2	3.10536	0.357143	0.322024	FALSE	0	0	6	4610	4.203e-05	61	8	0	0.73683	0.196774
HTATSF1	8	HTATSF1	3.18858	0.178571	0.313619	FALSE	0	0	6	3372	3.796e-05	35.5	8	0	0.726428	0.16153
RHOXF2	8	RHOXF2	3.27313	0.535714	0.305518	FALSE	0	0	6	2920	2.422e-05	25.375	8	0	0.715859	0.173801
TFRC	8	1	TFRC	2.96724	0.0357143	0.337013	FALSE	0	0	5	80630	0.00129013	75.875	8	0	0.754095	0.174304
ENO2	8	ENO2	2.88933	0	0.346101	FALSE	0	0	6	46708	0.00093052	74	8	0	0.763834	0.139048
SEC15L1	8	SEC15L1	3.36344	0.392857	0.297315	FALSE	0	0	6	3974	5.623e-05	17.75	8	0	0.704571	0.179847
CEACAM1	8	1	CEACAM1	3.01859	0.571429	0.33128	FALSE	0	0	6	2242	1.058e-05	87.25	8	0	0.747676	0.222577
LRP6	8	LRP6	2.88004	0.464286	0.347218	FALSE	0	0	6	43352	0.00074491	102.625	8	0	0.764996	0.187729
SNCG	8	SNCG	3.06729	0.0714286	0.326021	FALSE	0	0	6	5346	5.073e-05	49.875	8	0	0.741589	0.169828
PPP2R5D	8	PPP2R5D	3.24657	0.321429	0.308017	FALSE	0	0	6	2008	3.08e-05	34.75	8	0	0.719179	0.204882
MYO5A	8	MYO5A	3.07083	0.0714286	0.325645	FALSE	0	0	6	28322	0.00044257	43	8	0	0.741147	0.143098
CKM	8	1	2	CKM	2.86189	0.178571	0.34942	FALSE	0	0	6	16540	0.00032347	80.125	8	0	0.767264	0.142889
NCF4	8	NCF4	3.08145	0.214286	0.324522	FALSE	0	0	6	4202	4.664e-05	50.25	8	0	0.739819	0.170493
ZNF423	8	ZNF423	3.11731	0.214286	0.32079	FALSE	0	0	6	3284	3.458e-05	61	8	0	0.735336	0.189642
TEAD1	8	1	TEAD1	3.21381	0.107143	0.311157	FALSE	0	0	6	1868	2.783e-05	34.75	8	0	0.723274	0.161557
PRMT2	8	PRMT2	3.08676	0.464286	0.323964	FALSE	0	0	6	19814	0.00013276	78.625	8	0	0.739154	0.23716
RPS6KA4	8	RPS6KA4	3.07393	0.285714	0.325317	FALSE	0	0	6	3234	3.851e-05	63.75	8	0	0.740759	0.189925
HCNGP	8	HCNGP	3.18459	0.214286	0.314012	FALSE	0	0	6	5912	8.852e-05	38.75	8	0	0.726926	0.170154
GAS7	8	1	GAS7	3.10846	0.0357143	0.321703	FALSE	0	0	5	4334	7.752e-05	35.75	8	0	0.736443	0.144033
TICAM1	8	TICAM1	3.11067	0.25	0.321474	FALSE	0	0	6	2938	4.783e-05	47.25	8	0	0.736166	0.170126
PDE6D	8	PDE6D	3.27977	0.0714286	0.304899	FALSE	0	0	6	13490	0.00017297	23.625	8	0	0.715029	0.157534
PBK	8	PBK	2.92165	0.107143	0.342273	FALSE	0	0	6	7814	5.382e-05	82.625	8	0	0.759794	0.168289
MS4A2	8	MS4A2	2.98052	0.392857	0.335512	FALSE	0	0	5	3916	1.796e-05	93.375	8	0	0.752435	0.211735
STS-1	8	1	STS-1	2.74369	0.357143	0.364472	FALSE	0	0	5	14510	6.514e-05	140.875	8	0	0.782039	0.189858
DYRK1B	8	DYRK1B	3.09473	0.214286	0.32313	FALSE	0	0	6	5024	6.72e-05	40.875	8	0	0.738158	0.163153
MYL2	8	1	2	MYL2	3.32891	0.0714286	0.300399	FALSE	0	0	6	9058	0.0001603	13.5	8	0	0.708887	0.146067
PTPN22	8	PTPN22	3.04604	0.571429	0.328295	FALSE	0	0	6	1722	9.92e-06	71.875	8	0	0.744245	0.204772
BMP2	8	BMP2	3.53918	0.321429	0.282552	FALSE	0	0	6	7372	0.00012399	18.625	8	0	0.682603	0.198138
CS	8	CS	3.06817	0.107143	0.325927	FALSE	0	0	6	20510	0.00016645	64.75	8	0	0.741479	0.188231
DMPK	8	DMPK	3.07039	0.0357143	0.325692	FALSE	0	0	6	9028	0.00013645	41.375	8	0	0.741202	0.144573
ABI3	8	ABI3	3.22001	0.0357143	0.310558	FALSE	0	0	6	44354	0.0006615	21.875	8	0	0.722499	0.154197
UBA1	8	1	2	UBA1	3.27667	0	0.305188	FALSE	0	0	6	22340	0.00029482	19.625	8	0	0.715416	0.140038
NR1I3	8	NR1I3	3.25985	0.392857	0.306763	FALSE	0	0	7	622	5.41e-06	46.125	8	0	0.717519	0.222826
APOBEC3F	8	APOBEC3F	2.85525	0.5	0.350233	FALSE	0	0	6	4358	2.466e-05	112.25	8	0	0.768094	0.188023
APOBEC3G	8	APOBEC3G	2.85525	0.5	0.350233	FALSE	0	0	6	4358	2.466e-05	112.25	8	0	0.768094	0.188023
CHGB	8	CHGB	3.1961	0	0.312881	FALSE	0	0	6	7022	0.00010352	29.25	8	0	0.725487	0.13848
E4F1	8	E4F1	2.94024	0.357143	0.340108	FALSE	0	0	6	4174	2.783e-05	97.75	8	0	0.75747	0.200462
CHTF18	8	CHTF18	3.11952	0.357143	0.320562	FALSE	0	0	6	1598	1.483e-05	43.375	8	0	0.73506	0.167636
TRIM35	8	TRIM35	3.03763	0.321429	0.329204	FALSE	0	0	6	17590	6.575e-05	88.625	8	0	0.745297	0.23981
ENG	8	ENG	3.37716	0.642857	0.296107	FALSE	0	0	6	3794	2.339e-05	23.75	8	0	0.702855	0.230583
HOXA10	8	HOXA10	3.04737	0.142857	0.328152	FALSE	0	0	6	10534	0.00016389	66.875	8	0	0.744079	0.181694
LSM4	8	1	LSM4	3.40018	0.0714286	0.294102	FALSE	0	0	6	4604	8.558e-05	19.5	8	0	0.699978	0.145192
MYO10	8	MYO10	3.08765	0.0357143	0.323871	FALSE	0	0	6	8588	9.963e-05	44.5	8	0	0.739044	0.149829
UTRN	8	UTRN	3.15715	0.285714	0.316741	FALSE	0	0	6	7388	8.931e-05	39.75	8	0	0.730356	0.156621
CARD4	8	CARD4	3.11377	0.178571	0.321154	FALSE	0	0	5	3256	3.372e-05	44.875	8	0	0.735779	0.169508
ICAM1	8	ICAM1	3.18194	0.214286	0.314274	FALSE	0	0	6	27324	0.00035383	31.75	8	0	0.727258	0.15875
S100A2	8	S100A2	3.06197	0.107143	0.326587	FALSE	0	0	6	12746	0.00015184	58.625	8	0	0.742253	0.166429
STK16	8	STK16	3.11332	0.0714286	0.3212	FALSE	0	0	6	13628	0.00022339	35.75	8	0	0.735834	0.149468
MLLT1	8	MLLT1	3.17486	0.464286	0.314975	FALSE	0	0	5	2604	2.829e-05	39.625	8	0	0.728143	0.156621
ELL	8	ELL	3.05755	0.214286	0.32706	FALSE	0	0	5	6290	6.301e-05	56.375	8	0	0.742807	0.1521
HOMER1	8	HOMER1	3.43161	0.142857	0.291409	FALSE	0	0	6	2992	5.39e-05	12.5	8	0	0.696049	0.146084
LAS1L	8	1	LAS1L	2.79991	0.214286	0.357154	FALSE	0	0	6	9054	8.788e-05	118	8	0	0.775011	0.164685
BBS1	8	BBS1	3.12129	0.392857	0.32038	FALSE	0	0	6	2816	2.828e-05	36.75	8	0	0.734838	0.157725
FLJ22175	8	FLJ22175	3.60115	1	0.277689	FALSE	0	0	6	0	0	16.625	8	0	0.674856	0.302273
CCND2	8	CCND2	3.11687	0.392857	0.320835	FALSE	0	0	6	2136	2.087e-05	49.625	8	0	0.735392	0.181113
PRKAG2	8	PRKAG2	3.28331	0.214286	0.304571	FALSE	0	0	6	2260	3.707e-05	18	8	0	0.714586	0.151709
LAPTM5	8	LAPTM5	2.87384	0.321429	0.347967	FALSE	0	0	6	702	6.52e-06	90.25	8	0	0.76577	0.163496
HBEGF	8	HBEGF	3.10536	0.107143	0.322024	FALSE	0	0	6	16234	0.00017264	37.625	8	0	0.73683	0.155462
CTGF	8	CTGF	3.42541	0.178571	0.291936	FALSE	0	0	6	6328	0.00011245	20	8	0	0.696824	0.177928
DZIP3	8	DZIP3	3.00575	0.142857	0.332695	FALSE	0	0	6	17842	9.307e-05	79.375	8	0	0.749281	0.188246
CNKSR2	8	CNKSR2	3.16069	0.0357143	0.316387	FALSE	0	0	6	10136	0.00016764	33.25	8	0	0.729914	0.144444
OPTN	8	OPTN	3.13324	0	0.319158	FALSE	0	0	6	11642	0.00022108	44.625	8	0	0.733344	0.145903
MEPE	8	1	2	MEPE	3.00133	0.821429	0.333186	FALSE	0	0	6	244	6.1e-07	112.5	8	0	0.749834	0.282663
PRKD2	8	PRKD2	3.13192	0.0714286	0.319293	FALSE	0	0	6	12418	0.00016735	45.75	8	0	0.73351	0.164545
CUX1	8	CUX1	3.07924	0.178571	0.324756	FALSE	0	0	6	15596	0.00019084	53	8	0	0.740095	0.167994
HYOU1	8	HYOU1	3.01328	0.0714286	0.331864	FALSE	0	0	6	8386	3.432e-05	79.375	8	0	0.74834	0.214578
ELK4	8	ELK4	3.01107	0.142857	0.332108	FALSE	0	0	6	4316	3.506e-05	66.75	8	0	0.748617	0.17107
KIAA0404	8	KIAA0404	3.39265	0.214286	0.294755	FALSE	0	0	6	26272	0.00044812	19.875	8	0	0.700919	0.172149
TPM4	8	TPM4	3.50642	0.75	0.285191	FALSE	0	0	6	1064	5.53e-06	15.5	8	0	0.686698	0.276786
SART1	8	SART1	3.1961	0.142857	0.312881	FALSE	0	0	6	6070	6.514e-05	45.625	8	0	0.725487	0.183198
LSM10	8	LSM10	3.40416	0.25	0.293758	FALSE	0	0	6	3158	4.466e-05	19.75	8	0	0.69948	0.203125
PRDM1	8	PRDM1	3.11377	0.214286	0.321154	FALSE	0	0	6	5548	6.022e-05	55.875	8	0	0.735779	0.18729
AGER	8	AGER	3.07747	0.107143	0.324942	FALSE	0	0	5	10654	0.00015007	49	8	0	0.740317	0.164274
TFG	8	TFG	3.01903	0.0357143	0.331232	FALSE	0	0	5	19062	0.00025285	52.625	8	0	0.747621	0.15439
CLDN1	7	CLDN1	3.49624	0.238095	0.286022	FALSE	0	0	6	7142	8.999e-05	10.4286	7	0	0.68797	0.177945
UBE2A	7	1	UBE2A	2.97432	0.380952	0.336211	FALSE	0	0	6	1474	1.171e-05	95.1429	7	0	0.753209	0.213483
PIK3CD	7	PIK3CD	3.2988	0.142857	0.30314	FALSE	0	0	6	14408	0.00018875	35.8571	7	0	0.712649	0.202449
FGF2	7	FGF2	3.1629	0.238095	0.316165	FALSE	0	0	6	9236	0.00010951	47.2857	7	0	0.729637	0.210762
LSM7	7	LSM7	3.49447	0.142857	0.286167	FALSE	0	0	6	9048	0.0001076	19.1429	7	0	0.688192	0.181319
DOK3	7	1	2	DOK3	3.13767	0.285714	0.318708	FALSE	0	0	6	764	3.45e-06	62.5714	7	0	0.732791	0.264528
DBF4	7	DBF4	3.22975	0.333333	0.309622	FALSE	0	0	6	1156	1.131e-05	39.4286	7	0	0.721282	0.216259
MAFB	7	1	MAFB	3.07703	0.285714	0.324989	FALSE	0	0	6	4408	4.531e-05	67.2857	7	0	0.740372	0.185478
HAND1	7	HAND1	3.08455	0.190476	0.324196	FALSE	0	0	6	5152	6.596e-05	50	7	0	0.739431	0.178187
ATP5J2	7	ATP5J2	3.08898	0	0.323732	FALSE	0	0	6	6068	6.215e-05	56.1429	7	0	0.738878	0.198356
BBS4	7	1	BBS4	3.12218	0.333333	0.320289	FALSE	0	0	6	2240	1.951e-05	41.2857	7	0	0.734728	0.177956
BIRC6	7	BIRC6	2.85259	0.142857	0.350559	FALSE	0	0	6	18358	0.00027779	94.2857	7	0	0.768426	0.162698
CLOCK	7	CLOCK	3.12926	0.52381	0.319564	FALSE	0	0	6	22300	0.00023594	72.2857	7	0	0.733842	0.236534
TADA3	7	TADA3	2.95263	0.190476	0.338681	FALSE	0	0	6	12428	0.00018191	99.2857	7	0	0.755921	0.208421
HDAC8	7	HDAC8	3.11111	0.0476191	0.321429	FALSE	0	0	6	4854	5.286e-05	49.7143	7	0	0.736111	0.166667
RRM2B	7	RRM2B	2.79991	0.761905	0.357154	FALSE	0	0	6	648	3.07e-06	160.857	7	0	0.775011	0.237603
MMP1	7	MMP1	3.5405	0.0476191	0.282446	FALSE	0	0	6	10272	0.00019012	13.2857	7	0	0.682437	0.161172
XPO6	7	XPO6	3.0934	0.190476	0.323268	FALSE	0	0	6	7626	0.00012096	51.1429	7	0	0.738324	0.169613
DDX58	7	DDX58	2.88623	0.380952	0.346472	FALSE	0	0	6	4682	5.498e-05	107.143	7	0	0.764221	0.188049
MKL1	7	MKL1	3.21868	0.238095	0.310686	FALSE	0	0	6	28720	0.00031854	41.7143	7	0	0.722665	0.191573
PAK3	7	PAK3	3.08411	0.142857	0.324243	FALSE	0	0	5	2840	2.434e-05	54.2857	7	0	0.739487	0.176581
COL4A3	7	COL4A3	3.37406	0.142857	0.296379	FALSE	0	0	6	25462	0.00029661	19.8571	7	0	0.703243	0.185034
CKIP-1	7	CKIP-1	3.08544	0.142857	0.324103	FALSE	0	0	6	3330	3.539e-05	59.4286	7	0	0.739321	0.187755
SNURF	7	SNURF	3.02302	0	0.330795	FALSE	0	0	6	18202	0.00012532	79	7	0	0.747123	0.19697
IFI16	7	IFI16	2.94112	0.238095	0.340006	FALSE	0	0	6	4084	4.344e-05	96	7	0	0.757359	0.200359
ITGA2B	7	ITGA2B	3.14697	0.0952381	0.317766	FALSE	0	0	6	27540	0.00042584	40.8571	7	0	0.731629	0.156754
BOC	7	1	2	BOC	3.18902	0.333333	0.313576	FALSE	0	0	6	2652	4.132e-05	38.8571	7	0	0.726372	0.199852
MYH7	7	1	2	MYH7	2.89376	0.0476191	0.345571	FALSE	0	0	6	22874	0.00041537	83	7	0	0.76328	0.156437
FBXO11	7	FBXO11	3.0695	0.238095	0.325786	FALSE	0	0	6	2404	2.947e-05	58.4286	7	0	0.741313	0.173653
KARS	7	1	KARS	3.09473	0.0952381	0.32313	FALSE	0	0	6	4028	4.255e-05	47	7	0	0.738158	0.160653
FLT3	7	FLT3	2.74369	0.285714	0.364472	FALSE	0	0	5	15850	6.599e-05	153	7	0	0.782039	0.204902
C9orf76	7	C9orf76	3.54405	0.714286	0.282163	FALSE	0	0	6	29070	0.00017292	16.8571	7	0	0.681994	0.271889
YEATS4	7	YEATS4	3.28154	0.0952381	0.304735	FALSE	0	0	6	3398	4.374e-05	23.2857	7	0	0.714807	0.167017
ITGA3	7	1	ITGA3	3.27092	0.142857	0.305725	FALSE	0	0	6	13028	0.0002165	26.4286	7	0	0.716135	0.168831
COL17A1	7	COL17A1	3.27136	0.142857	0.305683	FALSE	0	0	6	1596	2.17e-05	25	7	0	0.71608	0.192351
XBP1	7	XBP1	3.07968	0.142857	0.324709	FALSE	0	0	6	3970	5.151e-05	62.1429	7	0	0.74004	0.175325
PTPRD	7	PTPRD	3.23506	0.52381	0.309113	FALSE	0	0	6	3712	5.048e-05	30	7	0	0.720618	0.180952
EIF2S1	7	EIF2S1	2.98539	0	0.334964	FALSE	0	0	6	10740	9.486e-05	74.2857	7	0	0.751826	0.186478
RNF126	7	RNF126	2.8039	0.333333	0.356647	FALSE	0	0	6	15118	0.00017329	132.143	7	0	0.774513	0.195846
UFD1L	7	UFD1L	3.28641	0.190476	0.304283	FALSE	0	0	7	4952	6.256e-05	32.4286	7	0	0.714199	0.200893
CD72	7	CD72	3.13546	0.428571	0.318933	FALSE	0	0	6	16198	0.00012638	62	7	0	0.733068	0.220918
FKBP2	7	FKBP2	3.09163	0.0952381	0.323454	FALSE	0	0	6	4898	6.204e-05	42.7143	7	0	0.738546	0.158373
MBIP	7	MBIP	3.26959	0.190476	0.305849	FALSE	0	0	6	7452	0.00010889	29	7	0	0.716301	0.181984
UQCRC1	7	1	UQCRC1	2.85347	0.0952381	0.35045	FALSE	0	0	6	9912	0.00011501	92.2857	7	0	0.768316	0.15895
BMPR1A	7	BMPR1A	3.30058	0.333333	0.302977	FALSE	0	0	6	4958	5.557e-05	25.5714	7	0	0.712428	0.190832
BGN	7	BGN	3.42098	0.142857	0.292314	FALSE	0	0	6	52948	0.00084217	20.1429	7	0	0.697377	0.175727
CNN1	7	CNN1	3.0788	0.142857	0.324802	FALSE	0	0	6	7738	0.00011222	57.1429	7	0	0.740151	0.167794
NIPBL	7	1	2	NIPBL	3.63701	0.142857	0.274951	FALSE	0	0	6	80250	0.00091575	12.2857	7	0	0.670374	0.172269
MYOZ2	7	MYOZ2	3.37362	0.0476191	0.296418	FALSE	0	0	6	9328	9.377e-05	19.2857	7	0	0.703298	0.193452
LTBP3	7	LTBP3	3.55954	0.0952381	0.280935	FALSE	0	0	6	4370	6.152e-05	18.2857	7	0	0.680058	0.20598
KAT2A	7	KAT2A	3.04515	0.285714	0.328391	FALSE	0	0	6	6346	8.799e-05	83	7	0	0.744356	0.219199
HOXB6	7	HOXB6	3.05489	0.0476191	0.327344	FALSE	0	0	6	6856	6.23e-05	70.8571	7	0	0.743139	0.203313
SLC25A22	7	1	2	SLC25A22	3.33245	0	0.30008	FALSE	0	0	6	2326	2.272e-05	26.8571	7	0	0.708444	0.172381
ELN	7	ELN	3.81319	0.285714	0.262248	FALSE	0	0	7	4314	6.554e-05	8.85714	7	0	0.648351	0.229323
RALY	7	1	2	RALY	3.4046	0	0.29372	FALSE	0	0	6	5488	8.316e-05	14.5714	7	0	0.699425	0.157807
GRM3	7	1	2	GRM3	3.30456	0.0476191	0.302612	FALSE	0	0	6	11178	0.0001142	22.1429	7	0	0.71193	0.174216
PHIP	7	1	2	PHIP	3.20142	0.0952381	0.312362	FALSE	0	0	6	64094	0.00090244	33.4286	7	0	0.724823	0.180328
PFKM	7	PFKM	3.02036	0	0.331086	FALSE	0	0	6	3852	3.861e-05	59.7143	7	0	0.747455	0.164928
ING4	7	ING4	2.91147	0.142857	0.34347	FALSE	0	0	6	21602	0.00023309	104.429	7	0	0.761067	0.190128
TNKS	7	TNKS	3.28552	0.0952381	0.304365	FALSE	0	0	6	3790	7.447e-05	30.2857	7	0	0.714309	0.189263
RAPGEF2	7	RAPGEF2	2.80567	0.238095	0.356422	FALSE	0	0	5	7904	6.681e-05	112.714	7	0	0.774292	0.172128
ING3	7	ING3	3.26959	0.238095	0.305849	FALSE	0	0	6	2306	2.804e-05	30.1429	7	0	0.716301	0.195145
CNKSR1	7	CNKSR1	3.15626	0.142857	0.31683	FALSE	0	0	5	2648	3.437e-05	41.5714	7	0	0.730467	0.170717
GC	7	GC	3.05179	0.0952381	0.327676	FALSE	0	0	5	7674	8.45e-05	64.1429	7	0	0.743526	0.177079
RFXANK	7	RFXANK	3.09385	0.0952381	0.323222	FALSE	0	0	6	5114	5.423e-05	50.4286	7	0	0.738269	0.17301
FBN1	7	FBN1	3.74679	0.285714	0.266895	FALSE	0	0	7	7904	0.00013897	10.7143	7	0	0.656651	0.195767
SUPT6H	7	SUPT6H	2.92475	0.0952381	0.34191	FALSE	0	0	6	6310	3.954e-05	92.1429	7	0	0.759407	0.174422
CENPB	7	CENPB	3.13988	0.0476191	0.318483	FALSE	0	0	6	3818	5.079e-05	46.8571	7	0	0.732514	0.178848
ANTXR2	7	ANTXR2	2.86321	0.619048	0.349258	FALSE	0	0	6	14652	0.00019689	123.143	7	0	0.767098	0.213542
KIAA1915	7	KIAA1915	2.84861	0.238095	0.351049	FALSE	0	0	5	3846	3.185e-05	104.857	7	0	0.768924	0.178999
LOC340061	7	LOC340061	2.87605	0.428571	0.347699	FALSE	0	0	6	1988	2.472e-05	125.714	7	0	0.765494	0.222644
CCDC5	7	CCDC5	3.25719	0.190476	0.307013	FALSE	0	0	6	4112	6.603e-05	36.8571	7	0	0.717851	0.208604
RIMS2	7	RIMS2	3.10934	0.142857	0.321612	FALSE	0	0	6	66752	0.00098388	60.1429	7	0	0.736332	0.209291
CNOT1	7	1	CNOT1	2.8548	0.285714	0.350287	FALSE	0	0	6	18142	0.00016358	115.286	7	0	0.76815	0.188525
E2F2	7	1	E2F2	3.10491	0.142857	0.32207	FALSE	0	0	5	2472	2.082e-05	55.2857	7	0	0.736886	0.194713
PDE6G	7	PDE6G	3.01682	0.428571	0.331475	FALSE	0	0	5	3078	2.631e-05	75.8571	7	0	0.747897	0.204467
TNPO3	7	TNPO3	3.16733	0.0476191	0.315723	FALSE	0	0	6	7560	9.008e-05	47	7	0	0.729084	0.194478
PLA2G2A	7	1	2	PLA2G2A	3.58964	0	0.278579	FALSE	0	0	7	92872	0.00135352	11.8571	7	0	0.676295	0.146718
GSPT1	7	GSPT1	3.23329	0.0476191	0.309283	FALSE	0	0	6	2274	3.706e-05	30.5714	7	0	0.720839	0.172585
CHAT	7	CHAT	3.20097	0.142857	0.312405	FALSE	0	0	6	1814	1.185e-05	56	7	0	0.724878	0.245891
PAWR	7	PAWR	3.1328	0.0952381	0.319203	FALSE	0	0	6	1472	1.747e-05	32.8571	7	0	0.7334	0.16224
SMARCA1	7	SMARCA1	3.30589	0.571429	0.302491	FALSE	0	0	6	414	2.74e-06	45.5714	7	0	0.711764	0.263419
PRSS23	7	PRSS23	3.21381	0	0.311157	FALSE	0	0	6	19800	0.00028984	24.2857	7	0	0.723274	0.15023
BCL2A1	6	BCL2A1	3.09031	0.266667	0.323593	FALSE	0	0	6	2778	2.746e-05	54.6667	6	0	0.738712	0.194643
KSR1	6	KSR1	3.01461	0.333333	0.331718	FALSE	0	0	6	1502	1.366e-05	83.5	6	0	0.748174	0.21645
HOMER3	6	HOMER3	3.26383	0.2	0.306388	FALSE	0	0	6	5424	8.165e-05	26.6667	6	0	0.717021	0.18287
TEAD3	6	TEAD3	3.35015	0	0.298494	FALSE	0	0	6	1112	1.819e-05	21.3333	6	0	0.706231	0.193651
CAP1	6	1	2	CAP1	3.23949	0.333333	0.308691	FALSE	0	0	6	4620	9.228e-05	32.1667	6	0	0.720064	0.2
TIRAP	6	TIRAP	3.18858	0.266667	0.313619	FALSE	0	0	6	2238	2.697e-05	39	6	0	0.726428	0.184921
ARHGEF12	6	ARHGEF12	3.32979	0.2	0.300319	FALSE	0	0	6	1204	2.927e-05	23.1667	6	0	0.708776	0.213396
MBD4	6	MBD4	3.08986	0.133333	0.323639	FALSE	0	0	6	2420	2.225e-05	65.8333	6	0	0.738767	0.205451
TNNC1	6	1	TNNC1	2.89243	0.4	0.34573	FALSE	0	0	6	16080	0.00024717	91.8333	6	0	0.763446	0.17834
EFEMP1	6	EFEMP1	3.1328	0.0666667	0.319203	FALSE	0	0	6	4490	5.749e-05	52.3333	6	0	0.7334	0.199485
SPG7	6	SPG7	3.27357	0	0.305477	FALSE	0	0	6	6666	9.395e-05	30.3333	6	0	0.715803	0.215686
TNNI1	6	TNNI1	3.28597	0.2	0.304324	FALSE	0	0	6	15640	0.00022393	36	6	0	0.714254	0.208577
TRAM1	6	1	2	TRAM1	3.02745	0.266667	0.330311	FALSE	0	0	6	5620	6.934e-05	63.5	6	0	0.746569	0.181992
RNF25	6	1	RNF25	2.8641	0.266667	0.34915	FALSE	0	0	6	5444	3.432e-05	136	6	0	0.766988	0.227527
IL13RA1	6	1	2	IL13RA1	3.50819	0.133333	0.285047	FALSE	0	0	6	4156	6.381e-05	16.5	6	0	0.686476	0.192771
BAT5	6	1	BAT5	3.39354	0	0.294678	FALSE	0	0	6	78078	0.00121347	16.3333	6	0	0.700808	0.174242
MICA	6	MICA	2.91943	0.4	0.342532	FALSE	0	0	6	61886	0.0006166	120.333	6	0	0.760071	0.240964
TBL3	6	TBL3	3.31695	0.2	0.301481	FALSE	0	0	6	1558	2.255e-05	29.3333	6	0	0.710381	0.204492
VprBP	6	VprBP	3.24436	0.6	0.308228	FALSE	0	0	6	1376	2.139e-05	39.1667	6	0	0.719456	0.225434
RYR2	6	RYR2	3.21071	0.2	0.311457	FALSE	0	0	6	5380	7.239e-05	38.6667	6	0	0.723661	0.203704
HSPB8	6	1	HSPB8	3.07658	0	0.325036	FALSE	0	0	6	52470	0.00090489	58	6	0	0.740427	0.195205
PJA1	6	PJA1	2.80699	0.333333	0.356253	FALSE	0	0	6	8726	6.085e-05	153.333	6	0	0.774126	0.21999
CD8A	6	CD8A	3.37937	0.2	0.295913	FALSE	0	0	6	12364	0.00025193	22.1667	6	0	0.702579	0.201515
CCNG1	6	CCNG1	2.99779	0.466667	0.333579	FALSE	0	0	6	2180	1.48e-05	99.5	6	0	0.750277	0.230858
LAMA1	6	LAMA1	2.861	0.133333	0.349528	FALSE	0	0	6	49694	0.00101155	97.6667	6	0	0.767375	0.178266
SLC11A2	6	1	SLC11A2	2.90792	0.6	0.343888	FALSE	0	0	6	188	2.07e-06	128.5	6	0	0.76151	0.249515
KIF1A	6	1	2	KIF1A	3.05091	0.466667	0.327771	FALSE	0	0	6	1744	1.173e-05	103.667	6	0	0.743637	0.288301
DDR1	6	DDR1	3.29748	0.266667	0.303262	FALSE	0	0	5	57364	0.00069425	46.8333	6	0	0.712815	0.245614
CYTH1	6	CYTH1	3.17751	0.133333	0.314712	FALSE	0	0	6	26720	0.00041612	47.6667	6	0	0.727811	0.184245
ARP3BETA	6	ARP3BETA	3.25409	0.133333	0.307305	FALSE	0	0	5	1366	1.883e-05	37.3333	6	0	0.718238	0.199099
OTUD1	6	OTUD1	3.28154	0.0666667	0.304735	FALSE	0	0	6	1920	2.85e-05	28.8333	6	0	0.714807	0.221785
LOXL4	6	LOXL4	3.36875	0.466667	0.296846	FALSE	0	0	6	10828	0.00016007	22	6	0	0.703907	0.220539
GABPB1	6	GABPB1	3.66888	0	0.272563	FALSE	0	0	6	11850	0.0001854	10.3333	6	0	0.66639	0.179487
MICAL1	6	1	MICAL1	2.98539	0.4	0.334964	FALSE	0	0	5	18102	0.00030565	101	6	0	0.751826	0.262837
TES	6	TES	3.18902	0.2	0.313576	FALSE	0	0	6	2024	2.477e-05	41.8333	6	0	0.726372	0.19213
UBR1	6	UBR1	3.17441	0	0.315019	FALSE	0	0	6	4892	7.505e-05	46.6667	6	0	0.728198	0.182667
FABP3	6	FABP3	3.21868	0.0666667	0.310686	FALSE	0	0	6	7306	0.0001428	27.8333	6	0	0.722665	0.173036
MYO1A	6	MYO1A	3.32891	0.0666667	0.300399	FALSE	0	0	6	4784	8.214e-05	32.6667	6	0	0.708887	0.193939
PRIM1	6	PRIM1	3.08101	0.133333	0.324569	FALSE	0	0	6	11328	7.521e-05	74.8333	6	0	0.739874	0.211776
AHNAK	6	1	AHNAK	2.99602	0	0.333777	FALSE	0	0	5	6236	4.974e-05	70	6	0	0.750498	0.196581
PLN	6	PLN	3.30367	0.2	0.302693	FALSE	0	0	6	5844	0.00010997	21.1667	6	0	0.712041	0.186012
CDON	6	CDON	3.13369	0.533333	0.319113	FALSE	0	0	6	1750	1.582e-05	49.3333	6	0	0.733289	0.212644
MYO7A	6	MYO7A	3.0425	0.0666667	0.328677	FALSE	0	0	6	3536	2.721e-05	70	6	0	0.744688	0.203922
SPARC	6	SPARC	3.61842	0.466667	0.276364	FALSE	0	0	6	3132	7.676e-05	24.1667	6	0	0.672698	0.235294
HIP1R	6	HIP1R	3.22045	0.333333	0.310515	FALSE	0	0	6	1482	3.241e-05	37.8333	6	0	0.722444	0.189167
KIAA0776	6	KIAA0776	3.3537	0	0.298178	FALSE	0	0	6	6894	9.762e-05	54.6667	6	0	0.705788	0.280977
CAB39	6	CAB39	3.22399	0.333333	0.310174	FALSE	0	0	7	2788	3.499e-05	32.1667	6	0	0.722001	0.190476
PSPH	6	PSPH	3.42408	0	0.292049	FALSE	0	0	6	2422	4.744e-05	18	6	0	0.69699	0.186813
SKD3	6	SKD3	3.2448	0.0666667	0.308186	FALSE	0	0	6	5058	9.417e-05	31.6667	6	0	0.7194	0.185629
MYOZ3	6	1	MYOZ3	3.49137	0.0666667	0.286421	FALSE	0	0	6	6022	5.906e-05	18.5	6	0	0.688579	0.214859
NUP107	6	NUP107	2.91058	0.133333	0.343574	FALSE	0	0	6	37244	0.00039679	91.1667	6	0	0.761178	0.176394
TGFBI	6	TGFBI	3.63214	0.266667	0.27532	FALSE	0	0	6	2884	5.436e-05	21.3333	6	0	0.670983	0.237828
TRIM2	6	TRIM2	3.3444	0	0.299007	FALSE	0	0	6	6388	0.00015753	43.8333	6	0	0.70695	0.259596
USP52	6	USP52	3.28818	0.0666667	0.30412	FALSE	0	0	6	1124	1.262e-05	26.5	6	0	0.713977	0.189951
LIFR	6	LIFR	3.12218	0.266667	0.320289	FALSE	0	0	6	2462	1.322e-05	70.5	6	0	0.734728	0.251493
RPS25	6	RPS25	2.84462	0.0666667	0.351541	FALSE	0	0	6	11082	0.00013707	121.833	6	0	0.769422	0.191417
MAT2A	6	MAT2A	3.0996	0	0.322622	FALSE	0	0	6	4816	2.347e-05	74.1667	6	0	0.73755	0.254051
AREG	6	AREG	3.14653	0	0.317811	FALSE	0	0	6	4440	5.588e-05	37	6	0	0.731684	0.183673
TSLP	6	1	2	TSLP	3.1359	0.266667	0.318888	FALSE	0	0	6	6874	6.638e-05	48.6667	6	0	0.733012	0.206553
CCL5	6	CCL5	3.20186	0	0.312319	FALSE	0	0	6	34742	0.00060613	38.5	6	0	0.724768	0.174419
RPP14	6	RPP14	3.80788	0.2	0.262613	FALSE	0	0	7	79676	0.00124916	7.83333	6	0	0.649015	0.261905
TRIM26	6	1	TRIM26	2.84418	0.133333	0.351595	FALSE	0	0	6	11216	7.513e-05	145.333	6	0	0.769478	0.22953
SLC4A1	6	SLC4A1	3.14608	0.133333	0.317856	FALSE	0	0	6	4886	6.35e-05	48.3333	6	0	0.73174	0.195122
SEPT4	6	2017-09-04	3.12572	0.133333	0.319926	FALSE	0	0	6	2230	2.525e-05	47.3333	6	0	0.734285	0.188844
JMJD1C	6	1	JMJD1C	3.09163	0.133333	0.323454	FALSE	0	0	6	1926	9.71e-06	81.8333	6	0	0.738546	0.269316
ADD2	6	ADD2	3.07481	0.266667	0.325223	FALSE	0	0	6	8586	0.00012708	67.8333	6	0	0.740649	0.201389
PSMC3IP	6	PSMC3IP	3.12439	0.133333	0.320062	FALSE	0	0	6	800	6.52e-06	79.3333	6	0	0.734451	0.280142
ADORA2A	6	ADORA2A	3.26118	0	0.306638	FALSE	0	0	6	7422	0.00011125	30.5	6	0	0.717353	0.191558
ANXA5	6	ANXA5	3.18858	0	0.313619	FALSE	0	0	6	20288	0.00033791	37	6	0	0.726428	0.169811
CSN3	6	1	2	CSN3	3.2479	0.133333	0.307892	FALSE	0	0	6	1738	2.711e-05	25.5	6	0	0.719013	0.187811
Gup1	6	Gup1	3.38291	0	0.295603	FALSE	0	0	6	4418	7.81e-05	19.3333	6	0	0.702136	0.177994
TNNT3	6	1	2	TNNT3	3.41788	0.0666667	0.292579	FALSE	0	0	7	3812	7.899e-05	16.6667	6	0	0.697765	0.183908
EGLN1	6	EGLN1	3.23949	0.133333	0.308691	FALSE	0	0	6	2314	2.963e-05	37.3333	6	0	0.720064	0.205773
GBP2	6	GBP2	3.53298	0.133333	0.283047	FALSE	0	0	6	2188	2.377e-05	14	6	0	0.683378	0.259615
ITGA4	6	ITGA4	3.15892	0.266667	0.316564	FALSE	0	0	6	18266	0.0002479	41.8333	6	0	0.730135	0.188537
NSD1	6	NSD1	3.06242	0.6	0.326539	FALSE	0	0	6	140	4.1e-07	110	6	0	0.742198	0.310734
BBS2	6	BBS2	3.18946	0.266667	0.313532	FALSE	0	0	6	1624	1.641e-05	29.3333	6	0	0.726317	0.195749
POLR3B	6	1	POLR3B	3.50509	0.2	0.285299	FALSE	0	0	6	2158	2.661e-05	26.8333	6	0	0.686864	0.265
GP1BA	6	GP1BA	3.12882	0.133333	0.31961	FALSE	0	0	6	25042	0.00038922	48.3333	6	0	0.733898	0.183974
ACVRL1	6	1	ACVRL1	3.34971	0.466667	0.298533	FALSE	0	0	6	2494	1.958e-05	28.5	6	0	0.706286	0.261468
CLIC5	6	CLIC5	3.18504	0.2	0.313968	FALSE	0	0	6	1686	1.917e-05	43.3333	6	0	0.72687	0.198157
ITGB6	6	ITGB6	3.20938	0.133333	0.311586	FALSE	0	0	6	7230	8.642e-05	39.3333	6	0	0.723827	0.205263
SEC8L1	6	SEC8L1	3.16423	0	0.316032	FALSE	0	0	6	5536	8.697e-05	41.3333	6	0	0.729471	0.18417
FHL5	6	FHL5	3.20142	0.4	0.312362	FALSE	0	0	6	1438	1.831e-05	41.5	6	0	0.724823	0.196032
ATP5I	6	ATP5I	3.14962	0.0666667	0.317498	FALSE	0	0	6	4410	5.074e-05	62.6667	6	0	0.731297	0.19375
DDX19	6	DDX19	3.11731	0.2	0.32079	FALSE	0	0	6	9732	6.838e-05	58	6	0	0.735336	0.210303
VPS24	6	VPS24	3.24037	0.0666667	0.308607	FALSE	0	0	6	22728	0.00039425	43.1667	6	0	0.719954	0.187225
TNFRSF11A	6	TNFRSF11A	2.96636	0.4	0.337114	FALSE	0	0	5	1952	1.252e-05	90.5	6	0	0.754205	0.215476
HIPK1	6	HIPK1	3	0.266667	0.333333	FALSE	0	0	6	2816	2.231e-05	86.5	6	0	0.75	0.211193
CHRNA4	6	1	2	CHRNA4	3.48517	0.133333	0.28693	FALSE	0	0	6	114230	0.00183359	12.6667	6	0	0.689354	0.17619
TGFBR3	6	TGFBR3	3.39841	0.6	0.294256	FALSE	0	0	6	2736	3.065e-05	21.6667	6	0	0.700199	0.252941
DEDD2	6	DEDD2	3.34661	0.266667	0.29881	FALSE	0	0	6	2676	3.519e-05	24.5	6	0	0.706673	0.209402
ALF	6	ALF	3.40682	0.0666667	0.293529	FALSE	0	0	7	5184	7.472e-05	24.6667	6	0	0.699148	0.192
WFS1	6	WFS1	2.88004	0.133333	0.347218	FALSE	0	0	6	5552	7.972e-05	103.167	6	0	0.764996	0.185654
MTB	6	MTB	2.85569	0.266667	0.350178	FALSE	0	0	6	8436	5.336e-05	123.333	6	0	0.768039	0.202577
VIL1	6	VIL1	3.03718	0.133333	0.329252	FALSE	0	0	5	3708	4.054e-05	78	6	0	0.745352	0.217697
RNF7	6	1	RNF7	3.04117	0.0666667	0.328821	FALSE	0	0	6	8880	7.476e-05	79.1667	6	0	0.744854	0.201282
NOLA1	6	NOLA1	3.30456	0.266667	0.302612	FALSE	0	0	6	1962	2.567e-05	33.3333	6	0	0.71193	0.235225
RORC	6	1	2	RORC	3.26206	0	0.306554	FALSE	0	0	6	990	9.58e-06	45.5	6	0	0.717242	0.247222
RASGRP3	6	1	RASGRP3	3.10226	0.0666667	0.322346	FALSE	0	0	6	1852	1.255e-05	63	6	0	0.737218	0.214204
POLR3E	6	POLR3E	3.54139	0.533333	0.282375	FALSE	0	0	6	1512	1.635e-05	26.1667	6	0	0.682326	0.275439
SCMH1	6	SCMH1	3.34396	0	0.299047	FALSE	0	0	7	4894	0.00010374	22.8333	6	0	0.707005	0.171916
PDK1	6	PDK1	3.15228	0.133333	0.317231	FALSE	0	0	5	2732	3.38e-05	49.3333	6	0	0.730965	0.206921
KRAS	6	KRAS	3.15848	0.2	0.316608	FALSE	0	0	6	2868	3.308e-05	49.5	6	0	0.73019	0.204011
DUSP24	6	DUSP24	3.27756	0	0.305105	FALSE	0	0	6	6614	9.414e-05	28.3333	6	0	0.715305	0.181015
MAFF	6	MAFF	3.21425	0.133333	0.311114	FALSE	0	0	6	3714	3.645e-05	45.3333	6	0	0.723218	0.217638
PPIG	6	PPIG	3.02656	0.266667	0.330408	FALSE	0	0	6	3910	2.518e-05	82.3333	6	0	0.74668	0.200489
C6orf82	6	C6orf82	2.97388	0.2	0.336261	FALSE	0	0	5	10528	0.00010194	79.8333	6	0	0.753265	0.199749
ASNS	6	1	2	ASNS	2.86277	0.0666667	0.349312	FALSE	0	0	6	14998	0.00023182	109.667	6	0	0.767154	0.187608
SNX2	6	SNX2	3.1722	0.133333	0.315239	FALSE	0	0	5	3450	3.187e-05	49.3333	6	0	0.728475	0.225038
USO1	6	1	USO1	3.18327	0	0.314143	FALSE	0	0	5	12622	0.00021583	38.8333	6	0	0.727092	0.174347
CHD9	5	CHD9	3.10314	0.3	0.322254	FALSE	0	0	6	1804	8.53e-06	88	5	0	0.737107	0.309155
FIBP	5	FIBP	3.20186	0.3	0.312319	FALSE	0	0	6	2334	3.41e-05	52	5	0	0.724768	0.251707
EIF5	5	EIF5	3.13679	0.3	0.318798	FALSE	0	0	6	2938	3.044e-05	68.8	5	0	0.732902	0.245161
SPHK1	5	SPHK1	2.98761	0.2	0.334716	FALSE	0	0	6	3164	1.972e-05	93.4	5	0	0.751549	0.238974
RPL41	5	RPL41	3.0332	0.3	0.329685	FALSE	0	0	6	1792	1.239e-05	81.4	5	0	0.74585	0.226816
TAZ	5	TAZ	3.23108	0	0.309494	FALSE	0	0	6	1972	2.488e-05	35	5	0	0.721116	0.217949
DUB3	5	1	2	DUB3	3.35281	0.1	0.298257	FALSE	0	0	6	52510	0.00090107	18.4	5	0	0.705899	0.214458
CDH15	5	CDH15	3.2417	0.4	0.30848	FALSE	0	0	6	700	6.52e-06	35	5	0	0.719788	0.235135
CAP2	5	CAP2	3.26649	0.1	0.306139	FALSE	0	0	6	3304	5.911e-05	30.6	5	0	0.716689	0.208333
LSM11	5	1	LSM11	3.52236	0.7	0.283901	FALSE	0	0	7	792	4.9e-06	24.8	5	0	0.684706	0.317949
CCDC120	5	CCDC120	3.48606	0	0.286857	FALSE	0	0	7	3588	9.778e-05	21.8	5	0	0.689243	0.221277
BDKRB2	5	BDKRB2	3.27844	0.2	0.305023	FALSE	0	0	6	546	7.98e-06	47.4	5	0	0.715195	0.244792
ROS1	5	ROS1	3.01549	0.5	0.331621	FALSE	0	0	6	3214	1.724e-05	108.6	5	0	0.748063	0.286016
SARS	5	SARS	3.19301	0	0.313185	FALSE	0	0	6	2204	1.794e-05	53	5	0	0.725874	0.231111
EGLN2	5	EGLN2	3.24126	0.2	0.308522	FALSE	0	0	6	2508	4.164e-05	41	5	0	0.719843	0.230682
POLL	5	POLL	3.2718	0	0.305642	FALSE	0	0	6	5902	9.637e-05	62.6	5	0	0.716025	0.293333
UBE4A	5	UBE4A	3.31341	0	0.301804	FALSE	0	0	6	3588	4.054e-05	58.6	5	0	0.710823	0.311351
ATP2A1	5	1	2	ATP2A1	3.3568	0.1	0.297903	FALSE	0	0	6	7280	7.819e-05	27	5	0	0.705401	0.264
RNUT1	5	RNUT1	3.43072	0.1	0.291484	FALSE	0	0	7	1976	3.513e-05	24.8	5	0	0.69616	0.242
PEX19	5	PEX19	3.22444	0	0.310132	FALSE	0	0	6	11342	0.0002227	43.4	5	0	0.721946	0.212
SERPINA3	5	SERPINA3	3.34396	0	0.299047	FALSE	0	0	6	19544	0.0002956	24.8	5	0	0.707005	0.22037
UHRF2	5	UHRF2	2.81142	0.5	0.355692	FALSE	0	0	6	8176	2.414e-05	187.8	5	0	0.773572	0.281982
FLJ20315	5	FLJ20315	2.8849	0.4	0.346632	FALSE	0	0	6	1970	1.788e-05	146.8	5	0	0.764387	0.258451
NRAP	5	NRAP	3.18946	0.4	0.313532	FALSE	0	0	6	1202	1.042e-05	56.6	5	0	0.726317	0.24206
SIX1	5	SIX1	3.52103	0.1	0.284008	FALSE	0	0	6	4626	6.701e-05	30.8	5	0	0.684872	0.282243
MIB1	5	MIB1	2.87782	0.3	0.347485	FALSE	0	0	6	3194	4.003e-05	146.6	5	0	0.765272	0.258657
ZF	5	ZF	3.30456	0.4	0.302612	FALSE	0	0	6	608	7.58e-06	41.8	5	0	0.71193	0.261635
TRIM5	5	TRIM5	2.88579	0.2	0.346526	FALSE	0	0	6	5058	5.928e-05	145.8	5	0	0.764276	0.25689
SELP	5	1	SELP	3.57459	0.1	0.279752	FALSE	0	0	6	6212	7.6e-05	16	5	0	0.678176	0.265517
POU3F2	5	POU3F2	3.19433	0.3	0.313054	FALSE	0	0	6	48616	0.00068898	58	5	0	0.725708	0.24721
ADAM17	5	ADAM17	3.13546	0.2	0.318933	FALSE	0	0	6	1206	1.59e-05	54.4	5	0	0.733068	0.226778
DBN1	5	DBN1	3.25587	0	0.307138	FALSE	0	0	6	14572	0.00022297	31.8	5	0	0.718017	0.206711
C13orf9	5	C13orf9	2.90969	0.8	0.343679	FALSE	0	0	6	36	3.7e-07	150.2	5	0	0.761288	0.29165
PACS1	5	1	PACS1	3.10049	0.2	0.32253	FALSE	0	0	6	2550	1.45e-05	87.6	5	0	0.737439	0.275079
ALOX12	5	ALOX12	3.37052	0.1	0.29669	FALSE	0	0	6	10802	0.0001373	18	5	0	0.703685	0.214815
BRIX	5	BRIX	3.10801	0	0.321749	FALSE	0	0	6	6524	5.894e-05	62.6	5	0	0.736498	0.210959
DTX3L	5	DTX3L	3.20983	0.2	0.311543	FALSE	0	0	6	6068	3.033e-05	72	5	0	0.723772	0.29465
TUBB3	5	1	TUBB3	2.88048	0.1	0.347165	FALSE	0	0	5	8376	8.508e-05	116.4	5	0	0.76494	0.217669
SLC1A5	5	SLC1A5	2.87826	0.2	0.347432	FALSE	0	0	6	5284	2.172e-05	133	5	0	0.765217	0.240217
DNTTIP2	5	DNTTIP2	3.08278	0.3	0.324383	FALSE	0	0	6	1498	6.9e-06	99	5	0	0.739653	0.311672
ANP32E	5	ANP32E	3.11332	0.1	0.3212	FALSE	0	0	6	2766	2.462e-05	77.4	5	0	0.735834	0.22994
NDC80	5	NDC80	3.25675	0.1	0.307055	FALSE	0	0	6	994	1.389e-05	38	5	0	0.717906	0.221302
SPTBN2	5	SPTBN2	3.12749	0.1	0.319745	FALSE	0	0	6	2272	2.041e-05	63.6	5	0	0.734064	0.236842
IGFBP5	5	1	IGFBP5	3.25675	0.1	0.307055	FALSE	0	0	6	7764	9.474e-05	33.4	5	0	0.717906	0.227778
TIMM13	5	TIMM13	3.34307	0.2	0.299126	FALSE	0	0	7	2364	4.368e-05	29.8	5	0	0.707116	0.219403
CAMKK1	5	CAMKK1	3.07525	0.1	0.325176	FALSE	0	0	5	2624	2.057e-05	74	5	0	0.740593	0.24966
CKB	5	1	CKB	2.86941	0.2	0.348504	FALSE	0	0	6	2072	1.441e-05	127.8	5	0	0.766324	0.230797
GNAL	5	GNAL	3.70031	0.4	0.270248	FALSE	0	0	6	2278	4.666e-05	6.8	5	0	0.662461	0.272
PLCB1	5	PLCB1	3.1089	0.2	0.321657	FALSE	0	0	6	1492	1.042e-05	85.8	5	0	0.736388	0.303915
GNGT1	5	GNGT1	3.2811	0.3	0.304776	FALSE	0	0	6	20564	0.00037811	30.8	5	0	0.714863	0.217143
METAP2	5	METAP2	3.15317	0.1	0.317142	FALSE	0	0	5	1936	1.457e-05	63.6	5	0	0.730854	0.29717
MKRN3	5	MKRN3	3.23285	0	0.309325	FALSE	0	0	6	5622	2.455e-05	70.8	5	0	0.720894	0.313004
TSNAX	5	TSNAX	3.15494	0	0.316964	FALSE	0	0	6	13102	0.00021006	57.8	5	0	0.730633	0.220155
COTL1	5	COTL1	3.07658	0	0.325036	FALSE	0	0	6	10024	9.252e-05	80.8	5	0	0.740427	0.258252
EPHB1	5	EPHB1	3.19832	0.4	0.312664	FALSE	0	0	6	786	9.33e-06	62.6	5	0	0.72521	0.281081
SLC34A1	5	SLC34A1	3.26605	0	0.306181	FALSE	0	0	6	2320	4.628e-05	31	5	0	0.716744	0.225564
NUP88	5	NUP88	3.34661	0.4	0.29881	FALSE	0	0	6	1362	1.887e-05	35.6	5	0	0.706673	0.3
NRP2	5	NRP2	3.76096	0.8	0.26589	FALSE	0	0	6	870	7.73e-06	12.2	5	0	0.65488	0.297561
SEMA3F	5	SEMA3F	3.76051	0.3	0.265921	FALSE	0	0	6	2342	7.169e-05	12.4	5	0	0.654936	0.25
WDR26	5	WDR26	2.87649	0.2	0.347645	FALSE	0	0	6	4000	3.498e-05	133.6	5	0	0.765438	0.232056
SDC4	5	SDC4	3.22311	0	0.31026	FALSE	0	0	6	2834	5.375e-05	49.6	5	0	0.722112	0.253125
MYH2	5	1	MYH2	3.4201	0	0.292389	FALSE	0	0	6	69478	0.00090239	23.8	5	0	0.697488	0.215094
HCFC2	5	HCFC2	3.29703	0.6	0.303303	FALSE	0	0	6	522	3.99e-06	38.8	5	0	0.712871	0.268056
PLXNA1	5	PLXNA1	3.25232	0.3	0.307472	FALSE	0	0	6	9974	0.00010146	33.8	5	0	0.71846	0.226846
H2AFZ	5	1	2	H2AFZ	2.91501	0	0.343052	FALSE	0	0	6	25152	0.0004965	104	5	0	0.760624	0.204771
GRINL1A	5	1	GRINL1A	3.42231	0	0.2922	FALSE	0	0	6	3070	5.238e-05	21.8	5	0	0.697211	0.212245
MFAP2	5	1	2	MFAP2	4.10093	0.4	0.243847	FALSE	0	0	7	448	8.21e-06	6.4	5	0	0.612384	0.344444
PDK2	5	PDK2	3.23063	0.3	0.309537	FALSE	0	0	6	1238	1.201e-05	37.4	5	0	0.721171	0.251351
NOV	5	NOV	3.33555	0.3	0.299801	FALSE	0	0	6	3150	6.214e-05	24.8	5	0	0.708057	0.21982
TEAD4	5	1	TEAD4	3.52103	0	0.284008	FALSE	0	0	6	1538	2.663e-05	20.4	5	0	0.684872	0.323333
PJA2	5	PJA2	2.88004	0.3	0.347218	FALSE	0	0	6	7104	6.976e-05	154.4	5	0	0.764996	0.261356
DDX18	5	1	2	DDX18	2.88446	0	0.346685	FALSE	0	0	6	21446	0.00035471	111.8	5	0	0.764442	0.208663
TXNIP	5	1	TXNIP	3.11775	0.1	0.320744	FALSE	0	0	6	1604	1.324e-05	64.2	5	0	0.735281	0.234686
LTK	5	LTK	3.11155	0.5	0.321383	FALSE	0	0	5	898	3.65e-06	93	5	0	0.736056	0.324476
MPDZ	5	MPDZ	3.53785	0.1	0.282658	FALSE	0	0	6	7850	9.329e-05	13	5	0	0.682769	0.221429
CSN2	5	CSN2	3.14962	0.1	0.317498	FALSE	0	0	6	5148	9.379e-05	58.2	5	0	0.731297	0.237037
MYH1	5	MYH1	2.8703	0.1	0.348396	FALSE	0	0	6	6522	8.115e-05	122.6	5	0	0.766213	0.220217
VPS28	5	VPS28	3.23152	0.2	0.309452	FALSE	0	0	6	2356	3.98e-05	36.6	5	0	0.72106	0.218072
NKD2	5	1	NKD2	2.92032	0.7	0.342428	FALSE	0	0	6	82	1.34e-06	144.8	5	0	0.75996	0.29018
COPG2	5	COPG2	3.43249	0.2	0.291334	FALSE	0	0	7	1808	1.709e-05	35.2	5	0	0.695938	0.25036
SIX3	5	1	SIX3	3.4595	0.2	0.28906	FALSE	0	0	6	1082	1.845e-05	21.8	5	0	0.692563	0.230108
MRAS	5	MRAS	3.3019	0.3	0.302856	FALSE	0	0	6	626	4.63e-06	43	5	0	0.712262	0.269182
RAB10	5	RAB10	3.15317	0.1	0.317142	FALSE	0	0	6	8762	0.00012896	50.6	5	0	0.730854	0.227273
FGB	5	FGB	3.73617	0.5	0.267654	FALSE	0	0	6	2262	4.209e-05	10.4	5	0	0.657979	0.261538
PINK1	5	PINK1	2.91014	0.8	0.343626	FALSE	0	0	6	88	5.8e-07	151.6	5	0	0.761233	0.296094
GOLPH2	5	GOLPH2	3.17441	0	0.315019	FALSE	0	0	6	5372	9.286e-05	52.4	5	0	0.728198	0.208097
RPL28	5	RPL28	2.85569	0.2	0.350178	FALSE	0	0	6	6054	7.385e-05	142.4	5	0	0.768039	0.236667
SEC61B	5	SEC61B	3.23949	0.2	0.308691	FALSE	0	0	6	660	9.74e-06	36	5	0	0.720064	0.246897
FGF1	5	FGF1	3.26118	0.5	0.306638	FALSE	0	0	6	5212	5.169e-05	54.8	5	0	0.717353	0.312
EIF3S1	5	EIF3S1	3.35414	0.1	0.298139	FALSE	0	0	7	1576	3.044e-05	26.2	5	0	0.705733	0.232727
ATXN7L3	5	ATXN7L3	3.43072	0	0.291484	FALSE	0	0	7	804	1.647e-05	14.6	5	0	0.69616	0.206061
TRIM31	5	TRIM31	3.21425	0.1	0.311114	FALSE	0	0	6	2972	6.558e-05	69.8	5	0	0.723218	0.28595
CGI-119	5	CGI-119	3.39177	0	0.294832	FALSE	0	0	6	5348	4.821e-05	17.8	5	0	0.701029	0.233333
COL9A1	5	1	COL9A1	3.94998	0.6	0.253166	FALSE	0	0	7	516	5.13e-06	11	5	0	0.631253	0.275
OCRL	5	1	OCRL	3.11465	0.1	0.321063	FALSE	0	0	6	5966	8.165e-05	65.6	5	0	0.735668	0.240741
GAP43	5	1	GAP43	3.04958	0.2	0.327914	FALSE	0	0	6	2798	1.73e-05	78.4	5	0	0.743803	0.241358
ERBP	5	ERBP	3.1359	0.3	0.318888	FALSE	0	0	6	448	2.41e-06	90	5	0	0.733012	0.326545
BCL2L10	5	BCL2L10	3.31695	0.6	0.301481	FALSE	0	0	6	264	3.84e-06	35.4	5	0	0.710381	0.285484
AGGF1	5	AGGF1	3.49225	0.2	0.286348	FALSE	0	0	7	5916	6.461e-05	42.8	5	0	0.688468	0.323664
DNAJB2	5	DNAJB2	3.2023	0.3	0.312275	FALSE	0	0	6	882	8.03e-06	59.2	5	0	0.724712	0.295477
RND1	5	RND1	3.73263	0.1	0.267908	FALSE	0	0	6	1578	3.878e-05	12.6	5	0	0.658422	0.235294
IGFBP7	5	IGFBP7	3.83621	0	0.260674	FALSE	0	0	6	13096	0.00020268	7	5	0	0.645474	0.214286
SHOC2	5	SHOC2	3.29482	0.5	0.303507	FALSE	0	0	6	292	2.81e-06	36.8	5	0	0.713147	0.240523
PRKD3	5	PRKD3	3.18681	0	0.313794	FALSE	0	0	6	6476	5.264e-05	56.8	5	0	0.726649	0.250224
PIK3CB	5	PIK3CB	3.13103	0.1	0.319384	FALSE	0	0	6	1260	9.28e-06	70	5	0	0.733621	0.248746
PTPRN2	5	PTPRN2	3.04737	0.1	0.328152	FALSE	0	0	5	15986	0.0003248	70.2	5	0	0.744079	0.216149
RAB6IP2	5	RAB6IP2	3.03364	0	0.329637	FALSE	0	0	6	2254	1.372e-05	82	5	0	0.745795	0.235465
ANKRD2	5	ANKRD2	3.0757	0.3	0.32513	FALSE	0	0	6	5940	7.185e-05	72.6	5	0	0.740538	0.227586
SIRT7	5	SIRT7	3.28685	0.1	0.304242	FALSE	0	0	6	2432	3.31e-05	47.2	5	0	0.714143	0.235354
RNF8	5	RNF8	3.17973	0	0.314493	FALSE	0	0	6	11618	0.00015725	64	5	0	0.727534	0.225806
DMRTB1	5	DMRTB1	3.65781	0.1	0.273387	FALSE	0	0	6	1158	2.336e-05	15.4	5	0	0.667773	0.255172
RPP25	5	RPP25	4.45374	0.5	0.22453	FALSE	0	0	7	3554	4.872e-05	4.2	5	0	0.568282	0.4
FCRH3	4	FCRH3	3.38291	0.5	0.295603	FALSE	0	0	6	30	1.7e-07	67	4	0	0.702136	0.443709
MAN1A2	4	MAN1A2	3.17663	0.166667	0.314799	FALSE	0	0	6	1446	1.584e-05	76	4	0	0.727922	0.287072
CLDN3	4	CLDN3	3.38955	0.5	0.295024	FALSE	0	0	6	5386	9.716e-05	29.5	4	0	0.701306	0.278571
KSR2	4	1	KSR2	3.15538	0.833333	0.316919	FALSE	0	0	6	20	4e-08	87.75	4	0	0.730578	0.371822
COL6A1	4	COL6A1	3.92209	0.333333	0.254966	FALSE	0	0	7	1464	1.542e-05	15.5	4	0	0.634739	0.331522
LSM5	4	LSM5	3.93493	0.166667	0.254134	FALSE	0	0	7	464	8.45e-06	15.75	4	0	0.633134	0.371951
RPS17	4	RPS17	2.84374	0.333333	0.35165	FALSE	0	0	6	6276	7.969e-05	196.75	4	0	0.769533	0.300919
FGF7	4	1	FGF7	4.01682	0.166667	0.248953	FALSE	0	0	6	1876	4.995e-05	16.5	4	0	0.622897	0.32
USP16	4	USP16	2.84993	0.166667	0.350885	FALSE	0	0	6	3688	4.483e-05	176	4	0	0.768758	0.282154
SLC25A1	4	SLC25A1	3.44843	0	0.289987	FALSE	0	0	6	1390	1.575e-05	39	4	0	0.693946	0.287879
ATP5D	4	1	ATP5D	3.38291	0.333333	0.295603	FALSE	0	0	6	746	4.2e-06	43.75	4	0	0.702136	0.31295
MYBPC1	4	1	2	MYBPC1	3.556	0.166667	0.281215	FALSE	0	0	7	2466	2.732e-05	11.75	4	0	0.6805	0.28125
PRIM2A	4	PRIM2A	3.18459	0.333333	0.314012	FALSE	0	0	6	6454	4.632e-05	77.75	4	0	0.726926	0.302734
CASQ2	4	CASQ2	3.31651	0.166667	0.301522	FALSE	0	0	6	31258	0.00045741	45.75	4	0	0.710436	0.340226
PTPRG	4	PTPRG	3.67729	0.5	0.271939	FALSE	0	0	6	840	1.82e-05	20.75	4	0	0.665339	0.359649
RAGE	4	1	RAGE	3.166	0.166667	0.315856	FALSE	0	0	6	6300	8.592e-05	75.5	4	0	0.72925	0.287356
RNF103	4	RNF103	2.88845	0.5	0.346207	FALSE	0	0	6	1152	3.84e-06	182.5	4	0	0.763944	0.323582
MRPL14	4	1	2	MRPL14	3.18371	0.166667	0.314099	FALSE	0	0	6	1242	3.86e-06	80	4	0	0.727036	0.359729
NECAB2	4	NECAB2	3.40018	0	0.294102	FALSE	0	0	6	1638	2.091e-05	35.25	4	0	0.699978	0.27621
CLDN5	4	1	2	CLDN5	3.78088	0.666667	0.264489	FALSE	0	0	7	720	7.59e-06	9.5	4	0	0.65239	0.327586
BTC	4	BTC	3.22178	0.5	0.310387	FALSE	0	0	6	922	8.59e-06	60.75	4	0	0.722278	0.345714
F13A1	4	F13A1	3.76184	0.333333	0.265827	FALSE	0	0	6	21352	0.00030205	16	4	0	0.65477	0.29717
INADL	4	1	INADL	3.58477	0	0.278958	FALSE	0	0	6	1174	1.902e-05	9.75	4	0	0.676903	0.257353
C20orf6	4	C20orf6	3.14962	0.333333	0.317498	FALSE	0	0	6	3078	2.335e-05	91.5	4	0	0.731297	0.294355
EFCBP2	4	EFCBP2	3.39929	0	0.294179	FALSE	0	0	6	1898	3.17e-05	33.25	4	0	0.700089	0.266529
NUP160	4	NUP160	3.50022	0	0.285696	FALSE	0	0	6	2864	6.163e-05	30.5	4	0	0.687472	0.25431
CDC42BPA	4	CDC42BPA	3.51173	0.166667	0.28476	FALSE	0	0	6	3464	5.245e-05	18	4	0	0.686034	0.265152
FLJ11305	4	FLJ11305	2.89066	0	0.345942	FALSE	0	0	6	8204	4.407e-05	147.5	4	0	0.763668	0.272305
DNASE1	4	DNASE1	3.18371	0.166667	0.314099	FALSE	0	0	6	1612	8.58e-06	74.5	4	0	0.727036	0.321739
ACTR1B	4	1	2	ACTR1B	3.13369	0	0.319113	FALSE	0	0	6	1164	9.57e-06	75.75	4	0	0.733289	0.2875
SERPINA5	4	SERPINA5	3.67552	0.5	0.27207	FALSE	0	0	7	5692	0.00011417	16	4	0	0.66556	0.29717
PILRB	4	PILRB	3.3568	0.333333	0.297903	FALSE	0	0	6	6488	0.00012417	62	4	0	0.705401	0.390823
USP6NL	4	USP6NL	3.10004	0.333333	0.322576	FALSE	0	0	5	1002	1.019e-05	86	4	0	0.737494	0.273089
RNF125	4	RNF125	2.90084	0.333333	0.344728	FALSE	0	0	6	2186	1.359e-05	177.75	4	0	0.762395	0.324497
AFAP	4	AFAP	3.30766	0.166667	0.302329	FALSE	0	0	6	656	2.79e-06	69.75	4	0	0.711543	0.376359
BFAR	4	BFAR	3.25631	0.166667	0.307096	FALSE	0	0	6	3356	3.09e-05	77	4	0	0.717961	0.376847
TNS	4	TNS	3.17973	0.5	0.314493	FALSE	0	0	6	2314	2.19e-05	64	4	0	0.727534	0.280702
SELPLG	4	1	SELPLG	3.43603	0.333333	0.291033	FALSE	0	0	6	8088	7.319e-05	25.25	4	0	0.695496	0.274457
MLPH	4	MLPH	3.39486	0	0.294563	FALSE	0	0	6	3246	9.222e-05	35	4	0	0.700642	0.253731
GAN	4	GAN	2.90748	0.166667	0.34394	FALSE	0	0	6	6548	8.656e-05	140.25	4	0	0.761565	0.26772
MYOM2	4	MYOM2	3.36122	0.333333	0.297511	FALSE	0	0	6	566	8.44e-06	28.25	4	0	0.704847	0.27451
POP4	4	POP4	4.63789	0.833333	0.215615	FALSE	0	0	8	114	2.78e-06	4.75	4	0	0.545263	0.527778
POP5	4	1	2	POP5	4.63789	0.833333	0.215615	FALSE	0	0	8	114	2.78e-06	4.75	4	0	0.545263	0.527778
IL4	4	IL4	3.79327	0.166667	0.263625	FALSE	0	0	6	618	1.738e-05	12.25	4	0	0.650841	0.273256
MKKS	4	1	2	MKKS	3.60646	0.333333	0.27728	FALSE	0	0	7	518	7.06e-06	11.75	4	0	0.674192	0.27381
KCTD13	4	KCTD13	3.31563	0	0.301602	FALSE	0	0	6	2428	3.715e-05	33	4	0	0.710547	0.260163
TNNI3K	4	TNNI3K	3.41567	0.166667	0.292768	FALSE	0	0	6	1266	2.676e-05	39.5	4	0	0.698041	0.276596
FBLP-1	4	FBLP-1	3.36565	0.166667	0.29712	FALSE	0	0	6	768	1.062e-05	31.75	4	0	0.704294	0.328947
ELF5	4	ELF5	3.46746	0	0.288395	FALSE	0	0	7	854	1.85e-05	20.5	4	0	0.691567	0.256579
ITPKA	4	ITPKA	3.08499	0.166667	0.32415	FALSE	0	0	6	2338	1.009e-05	97.25	4	0	0.739376	0.306171
GABPB2	4	GABPB2	4.02036	0	0.248734	FALSE	0	0	7	3282	5.642e-05	10.25	4	0	0.622455	0.272059
PRPH	4	1	2	PRPH	3.59008	0	0.278545	FALSE	0	0	7	6464	8.046e-05	9.75	4	0	0.676239	0.25
KCNJ4	4	KCNJ4	3.28862	0.166667	0.304079	FALSE	0	0	6	1294	2.422e-05	45.25	4	0	0.713922	0.27454
AKT3	4	AKT3	3.19345	0.5	0.313141	FALSE	0	0	6	666	5.1e-06	61	4	0	0.725819	0.313144
SIRPA	4	1	SIRPA	3.34086	0.5	0.299324	FALSE	0	0	6	2612	3.272e-05	61.5	4	0	0.707393	0.400327
PRELP	4	PRELP	3.71315	0.5	0.269313	FALSE	0	0	6	948	1.066e-05	25.5	4	0	0.660857	0.344595
C19orf57	4	C19orf57	3.45463	0	0.289467	FALSE	0	0	7	952	1.322e-05	15.25	4	0	0.693172	0.263889
LDB3	4	LDB3	3.88181	0.5	0.257612	FALSE	0	0	7	44	4.1e-07	12.25	4	0	0.639774	0.360294
TRIM54	4	TRIM54	3.33776	0.666667	0.299602	FALSE	0	0	7	184	3.17e-06	33.5	4	0	0.70778	0.281513
USP6	4	USP6	2.91501	0	0.343052	FALSE	0	0	6	20184	0.00034016	128	4	0	0.760624	0.251984
DLX5	4	1	DLX5	3.41036	0.333333	0.293224	FALSE	0	0	7	1050	1.43e-05	33	4	0	0.698705	0.272917
COL9A3	4	COL9A3	3.25852	0.5	0.306888	FALSE	0	0	6	24642	0.00036596	45.25	4	0	0.717685	0.267857
PSIP1	4	PSIP1	3.2811	0.333333	0.304776	FALSE	0	0	5	150	1.56e-06	51.75	4	0	0.714863	0.319444
USP17	4	USP17	3.8579	0.166667	0.259208	FALSE	0	0	7	8006	0.0001527	5.5	4	0	0.642762	0.277778
ARNT2	4	ARNT2	3.3205	0.333333	0.30116	FALSE	0	0	7	606	7.99e-06	34.75	4	0	0.709938	0.313636
CCL7	4	CCL7	3.72864	0	0.268194	FALSE	0	0	6	10022	0.00018112	14.25	4	0	0.65892	0.259804
KDELR1	4	KDELR1	3.55467	0.166667	0.28132	FALSE	0	0	7	2248	4.238e-05	23.5	4	0	0.680666	0.298701
MED24	4	1	MED24	3.14653	0.5	0.317811	FALSE	0	0	6	162	5e-07	97.5	4	0	0.731684	0.382353
INCENP	4	1	INCENP	3.56042	0	0.280865	FALSE	0	0	7	282	7.27e-06	16.25	4	0	0.679947	0.272321
MYT1L	4	MYT1L	3.33333	0.333333	0.3	FALSE	0	0	6	1224	1.156e-05	44.25	4	0	0.708333	0.282051
FOXP3	4	FOXP3	3.29349	0.333333	0.303629	FALSE	0	0	6	460	3.7e-06	39	4	0	0.713313	0.289179
ADAM9	4	ADAM9	3.27047	0.166667	0.305766	FALSE	0	0	6	1444	1.887e-05	43.5	4	0	0.716191	0.279221
SSTR2	4	SSTR2	3.30058	0.333333	0.302977	FALSE	0	0	6	1126	2.035e-05	59.75	4	0	0.712428	0.309896
MRX85	4	MRX85	3.66224	0.333333	0.273057	FALSE	0	0	7	900	1.03e-05	20	4	0	0.66722	0.379808
TSSC1	4	TSSC1	3.43293	0	0.291296	FALSE	0	0	7	758	7.47e-06	19.5	4	0	0.695883	0.284615
TAGLN	4	TAGLN	3.16733	0.333333	0.315723	FALSE	0	0	6	1554	1.566e-05	74	4	0	0.729084	0.277256
RPH3A	4	RPH3A	3.53873	0	0.282587	FALSE	0	0	6	2370	3.65e-05	18	4	0	0.682658	0.257576
PPBP	4	PPBP	3.27446	0	0.305394	FALSE	0	0	6	2410	4.153e-05	44.25	4	0	0.715693	0.258982
HERC5	4	HERC5	3.33599	0.333333	0.299761	FALSE	0	0	6	448	6.38e-06	34.5	4	0	0.708001	0.305804
GFER	4	GFER	3.444	0.666667	0.29036	FALSE	0	0	7	256	3.03e-06	28.75	4	0	0.6945	0.334302
MID1	4	MID1	3.31873	0	0.301321	FALSE	0	0	6	5814	5.241e-05	79.75	4	0	0.710159	0.405928
KIDINS220	4	KIDINS220	3.16202	0	0.316254	FALSE	0	0	6	2804	3.812e-05	58	4	0	0.729748	0.255605
SURF4	4	SURF4	3.66932	0	0.27253	FALSE	0	0	7	1518	1.522e-05	28	4	0	0.666335	0.346154
ANKRD12	4	ANKRD12	3.24834	0	0.30785	FALSE	0	0	6	882	7.84e-06	51.25	4	0	0.718958	0.283898
MECR	4	1	MECR	3.34617	0.666667	0.298849	FALSE	0	0	7	34	1.5e-07	67.75	4	0	0.706729	0.431529
FBN2	4	1	FBN2	3.30589	0.5	0.302491	FALSE	0	0	6	45422	0.00066378	37	4	0	0.711764	0.266304
GNL2	4	1	GNL2	3.15051	0	0.317409	FALSE	0	0	6	2948	3.071e-05	76.5	4	0	0.731186	0.270609
DNM3	4	DNM3	3.23152	0.166667	0.309452	FALSE	0	0	6	3666	4.456e-05	62.5	4	0	0.72106	0.324607
BHLHB3	4	1	2	BHLHB3	3.18017	0.333333	0.314449	FALSE	0	0	6	114	6e-07	80.5	4	0	0.727479	0.328893
MAZ	4	MAZ	3.14033	0.5	0.318438	FALSE	0	0	6	1372	1.652e-05	105	4	0	0.732459	0.320336
TBXA2R	4	TBXA2R	3.12041	0.333333	0.320471	FALSE	0	0	6	1740	1.428e-05	87.5	4	0	0.734949	0.289735
COL9A2	4	COL9A2	3.76361	0.5	0.265702	FALSE	0	0	7	4278	9.562e-05	17.75	4	0	0.654548	0.29661
UBOX5	4	UBOX5	3.31873	0	0.301321	FALSE	0	0	6	2838	1.843e-05	72.5	4	0	0.710159	0.388587
EML4	4	EML4	3.48783	0	0.286712	FALSE	0	0	7	1308	1.828e-05	23.5	4	0	0.689022	0.292208
TLE3	4	TLE3	3.29925	0.166667	0.303099	FALSE	0	0	6	2948	3.693e-05	31.5	4	0	0.712594	0.267241
FLJ10359	4	FLJ10359	3.24081	0	0.308564	FALSE	0	0	6	3482	1.73e-05	66.25	4	0	0.719898	0.299312
SPATA2	4	SPATA2	3.41479	0.333333	0.292844	FALSE	0	0	6	4686	0.00013085	32.25	4	0	0.698152	0.260163
TRIM15	4	TRIM15	3.50155	0	0.285588	FALSE	0	0	6	210	2.77e-06	20.75	4	0	0.687306	0.282143
POP1	4	POP1	3.92386	0.5	0.254851	FALSE	0	0	7	56364	0.00087409	10	4	0	0.634517	0.314516
C20orf18	4	C20orf18	2.86454	0.5	0.349096	FALSE	0	0	6	2514	1.829e-05	182.5	4	0	0.766932	0.30375
HDHD2	4	HDHD2	3.64807	0	0.274117	FALSE	0	0	6	2818	5.201e-05	14.75	4	0	0.668991	0.25463
TRIB1	4	1	2	TRIB1	3.64232	0	0.27455	FALSE	0	0	6	734	1.4e-05	16	4	0	0.66971	0.3125
PARVA	4	1	PARVA	3.20983	0	0.311543	FALSE	0	0	6	3352	4.11e-05	57.75	4	0	0.723772	0.262731
CALML5	4	CALML5	2.88048	0.333333	0.347165	FALSE	0	0	6	2164	2.821e-05	157	4	0	0.76494	0.274518
RABIF	4	RABIF	3.81275	0	0.262278	FALSE	0	0	6	928	2.515e-05	10.25	4	0	0.648406	0.280303
ADRA2A	4	ADRA2A	3.10713	0.333333	0.321841	FALSE	0	0	6	1074	9.65e-06	85.5	4	0	0.736609	0.276786
SPHK2	4	SPHK2	3.15494	0.166667	0.316964	FALSE	0	0	6	2040	1.288e-05	78.5	4	0	0.730633	0.298851
F12	4	F12	3.38026	0	0.295836	FALSE	0	0	6	22286	0.00038011	22	4	0	0.702468	0.25
DDX6	4	DDX6	3.21425	0	0.311114	FALSE	0	0	6	932	7.2e-06	56.5	4	0	0.723218	0.278894
PGF	4	1	PGF	3.77114	1	0.265172	FALSE	0	0	6	0	0	14.25	4	0	0.653608	0.365385
DTNA	4	DTNA	3.38247	0.5	0.295642	FALSE	0	0	6	966	1.725e-05	41.75	4	0	0.702191	0.266026
NUPL2	4	NUPL2	3.34042	0.166667	0.299364	FALSE	0	0	7	2278	1.426e-05	49.75	4	0	0.707448	0.356884
SYTL4	4	SYTL4	3.71448	0	0.269217	FALSE	0	0	7	2618	8.032e-05	25.5	4	0	0.660691	0.355072
C1QA	4	C1QA	3.45817	0.333333	0.289171	FALSE	0	0	6	3692	4.931e-05	28	4	0	0.692729	0.298387
FIP1L1	4	FIP1L1	3.16113	0.166667	0.316342	FALSE	0	0	6	2162	1.548e-05	81.75	4	0	0.729858	0.287102
IPO13	4	IPO13	3.35148	0	0.298375	FALSE	0	0	7	53556	0.00089196	29.5	4	0	0.706065	0.256757
CPS1	4	1	CPS1	3.08101	0.5	0.324569	FALSE	0	0	6	958	4.83e-06	102	4	0	0.739874	0.305389
DTX3	4	DTX3	3.4595	0.333333	0.28906	FALSE	0	0	6	442	2.25e-06	60	4	0	0.692563	0.463178
ADAMTS1	4	ADAMTS1	3.81806	0	0.261913	FALSE	0	0	6	4342	0.00015888	14.75	4	0	0.647742	0.25
TLN2	4	1	TLN2	3.13015	0.166667	0.319474	FALSE	0	0	6	5874	0.00011215	71.5	4	0	0.733732	0.263941
ELF4	4	ELF4	2.88712	0.666667	0.346366	FALSE	0	0	6	76	6.3e-07	174.25	4	0	0.76411	0.31567
HTRA1	4	HTRA1	3.72598	0	0.268385	FALSE	0	0	6	3356	7.209e-05	18.75	4	0	0.659252	0.295833
EGLN3	4	EGLN3	3.40992	0.666667	0.293262	FALSE	0	0	7	98	7e-07	23.25	4	0	0.698761	0.318493
FLJ22318	4	FLJ22318	3.22311	0	0.31026	FALSE	0	0	6	9050	0.00010406	80	4	0	0.722112	0.372642
IBTK	4	IBTK	3.46746	0.333333	0.288395	FALSE	0	0	6	704	8.16e-06	25.75	4	0	0.691567	0.268421
ITGA7	4	ITGA7	3.34396	0.333333	0.299047	FALSE	0	0	7	598	1.143e-05	31.75	4	0	0.707005	0.278761
ITGAM	4	ITGAM	3.75077	0.333333	0.266612	FALSE	0	0	7	1008	1.577e-05	11	4	0	0.656153	0.275641
MGRN1	4	MGRN1	3.25764	0	0.306971	FALSE	0	0	6	4574	1.546e-05	84.25	4	0	0.717795	0.387209
LRP2BP	4	LRP2BP	3.50686	0	0.285155	FALSE	0	0	7	3604	5.042e-05	14.75	4	0	0.686642	0.25463
NTHL1	4	NTHL1	3.14431	0	0.318035	FALSE	0	0	6	17950	0.0001654	72.75	4	0	0.731961	0.263787
VEGFB	4	VEGFB	3.77114	0.666667	0.265172	FALSE	0	0	6	4844	4.584e-05	13.5	4	0	0.653608	0.346154
C19orf14	4	C19orf14	3.33112	0	0.300199	FALSE	0	0	6	2766	4.244e-05	40	4	0	0.70861	0.261745
RUSC2	4	RUSC2	3.24701	0.166667	0.307975	FALSE	0	0	6	10152	0.00022129	38.75	4	0	0.719124	0.253311
VSNL1	4	1	VSNL1	3.24347	0	0.308312	FALSE	0	0	6	9438	0.00019081	44	4	0	0.719566	0.255952
RND2	3	RND2	3.83931	0	0.260464	FALSE	0	0	6	124630	0.00177435	13	3	0	0.645086	0.333333
SCIN	3	SCIN	3.3413	0	0.299285	FALSE	0	0	6	908	6.62e-06	64	3	0	0.707337	0.388889
BTLA	3	BTLA	3.44356	0.333333	0.290397	FALSE	0	0	6	1054	1.639e-05	68.6667	3	0	0.694555	0.458613
HERC3	3	HERC3	2.91766	0.666667	0.34274	FALSE	0	0	6	114	1.22e-06	193.333	3	0	0.760292	0.38436
RNF130	3	RNF130	3.31341	0	0.301804	FALSE	0	0	6	3664	1.326e-05	94.3333	3	0	0.710823	0.510018
LOC159090	3	LOC159090	3.57326	0	0.279856	FALSE	0	0	7	518	8.51e-06	42.3333	3	0	0.678342	0.523207
SEH1L	3	1	SEH1L	3.72997	0	0.268099	FALSE	0	0	7	396	6.11e-06	37	3	0	0.658754	0.590164
ELAVL2	3	ELAVL2	3.77379	0.666667	0.264985	FALSE	0	0	7	140	9.4e-07	18.6667	3	0	0.653276	0.388889
KY	3	KY	3.69854	0.333333	0.270377	FALSE	0	0	6	1020	9.18e-06	16.3333	3	0	0.662683	0.372093
MYH4	3	MYH4	3.77158	0	0.265141	FALSE	0	0	6	354	8.5e-06	14.6667	3	0	0.653552	0.350427
FLJ35827	3	FLJ35827	3.21381	0.333333	0.311157	FALSE	0	0	6	1862	1.556e-05	82.3333	3	0	0.723274	0.390476
HOMER2	3	HOMER2	3.4471	0	0.290099	FALSE	0	0	6	1332	3.273e-05	24.6667	3	0	0.694112	0.342995
EIF3J	3	EIF3J	3.47499	0	0.287771	FALSE	0	0	7	532	8.42e-06	32.6667	3	0	0.690626	0.351852
SLN	3	1	2	SLN	3.72067	0.666667	0.268769	FALSE	0	0	7	152	7.1e-07	8.33333	3	0	0.659916	0.490196
FARP2	3	FARP2	3.10447	0.333333	0.322116	FALSE	0	0	6	3792	5.694e-05	103	3	0	0.736941	0.366667
PTD004	3	PTD004	3.41257	0	0.293034	FALSE	0	0	6	514	8.99e-06	38.6667	3	0	0.698429	0.339339
MYH6	3	1	2	MYH6	2.9274	0	0.3416	FALSE	0	0	6	36262	0.00089264	165.667	3	0	0.759075	0.338125
HIRIP3	3	HIRIP3	3.2448	0.333333	0.308186	FALSE	0	0	6	330	2.66e-06	82.3333	3	0	0.7194	0.414141
LAIR1	3	LAIR1	3.47676	0.333333	0.287624	FALSE	0	0	6	242	1.42e-06	70.6667	3	0	0.690405	0.495305
CCL21	3	1	CCL21	3.56485	0	0.280517	FALSE	0	0	7	10198	0.00015027	19.6667	3	0	0.679394	0.345679
UBE4B	3	UBE4B	3.4108	0	0.293186	FALSE	0	0	6	1152	3.84e-06	83	3	0	0.69865	0.557823
PKD2L1	3	PKD2L1	3.90394	0	0.256151	FALSE	0	0	7	84	1.3e-06	9.66667	3	0	0.637008	0.45614
IL13	3	IL13	3.38247	0.333333	0.295642	FALSE	0	0	6	1988	1.438e-05	46	3	0	0.702191	0.371274
GRIP2	3	GRIP2	3.67021	1	0.272464	FALSE	0	0	6	0	0	23.3333	3	0	0.666224	0.416667
PPP1R12C	3	PPP1R12C	3.66003	0.333333	0.273222	FALSE	0	0	6	730	1.218e-05	10.6667	3	0	0.667497	0.356322
TRIM17	3	1	TRIM17	3.47676	0.666667	0.287624	FALSE	0	0	6	20	4e-08	73	3	0	0.690405	0.574803
ZNF652	3	ZNF652	3.38247	0.333333	0.295642	FALSE	0	0	6	906	1.633e-05	58.3333	3	0	0.702191	0.353659
WDR45	3	1	2	WDR45	3.34219	0.333333	0.299205	FALSE	0	0	6	29956	0.00050813	41	3	0	0.707227	0.338889
PTPNS1	3	PTPNS1	3.35591	0.333333	0.297982	FALSE	0	0	6	1720	2.146e-05	56	3	0	0.705511	0.40048
ANKRD1	3	1	2	ANKRD1	3.86676	0.333333	0.258615	FALSE	0	0	7	574	1.162e-05	9.66667	3	0	0.641656	0.373333
MYPN	3	1	MYPN	3.75653	0.666667	0.266203	FALSE	0	0	7	1140	1.448e-05	16.6667	3	0	0.655434	0.37037
PEBP4	3	PEBP4	3.16158	0.666667	0.316298	FALSE	0	0	6	80	4.7e-07	87	3	0	0.729803	0.393665
HFE	3	1	2	HFE	3.82205	0.333333	0.26164	FALSE	0	0	6	48612	0.00088535	6	3	0	0.647244	0.377778
IL17RB	3	IL17RB	3.17397	0.333333	0.315063	FALSE	0	0	6	9702	0.00023104	81	3	0	0.728254	0.352256
CD8B	3	1	2	CD8B	3.81186	0.333333	0.262339	FALSE	0	0	7	40054	0.00088535	5.33333	3	0	0.648517	0.384615
DAD1	3	1	2	DAD1	3.26693	0	0.306098	FALSE	0	0	6	518	3.35e-06	63.6667	3	0	0.716633	0.382114
CARHSP1	3	CARHSP1	3.22798	0	0.309792	FALSE	0	0	6	832	5.26e-06	61	3	0	0.721503	0.363636
MAGED4	3	1	MAGED4	3.67596	0	0.272038	FALSE	0	0	7	552	9.64e-06	38	3	0	0.665505	0.560606
MGC24665	3	MGC24665	4.36255	1	0.229224	FALSE	0	0	7	0	0	11.3333	3	0	0.579681	0.809524
ZNHIT1	3	ZNHIT1	3.06507	0.666667	0.326257	FALSE	0	0	6	174	7.6e-07	127.333	3	0	0.741866	0.368015
VASN	3	VASN	4.02081	0.666667	0.248706	FALSE	0	0	7	68	6.7e-07	17	3	0	0.622399	0.68
MYST4	3	MYST4	3.37185	0	0.296573	FALSE	0	0	7	428	2.59e-06	48.3333	3	0	0.703519	0.404558
RIPK4	3	RIPK4	3.29084	0	0.303874	FALSE	0	0	6	292	3.25e-06	60.6667	3	0	0.713645	0.387446
Ufm1	3	Ufm1	3.37583	0.333333	0.296223	FALSE	0	0	6	84	1.07e-06	89	3	0	0.703021	0.509579
LOC51255	3	LOC51255	3.45551	0	0.289393	FALSE	0	0	6	3398	5.559e-05	72.6667	3	0	0.693061	0.568783
AIMP1	3	AIMP1	3.38424	0	0.295487	FALSE	0	0	6	910	8.59e-06	33.3333	3	0	0.70197	0.351449
ZNRF4	3	ZNRF4	3.49004	0	0.28653	FALSE	0	0	6	1426	1.862e-05	75.6667	3	0	0.688745	0.561404
ICA1	3	ICA1	3.33378	0.333333	0.29996	FALSE	0	0	6	4164	6.04e-05	49.3333	3	0	0.708278	0.340278
MAGEA1	3	MAGEA1	3.21204	0	0.311329	FALSE	0	0	6	1894	2.659e-05	71.6667	3	0	0.723495	0.338118
ARL6IP4	3	ARL6IP4	3.15405	0.333333	0.317053	FALSE	0	0	6	1480	8.7e-06	103.667	3	0	0.730744	0.371703
FBXL11	3	FBXL11	3.1359	0.666667	0.318888	FALSE	0	0	6	22	5e-08	125.667	3	0	0.733012	0.401491
RNF167	3	RNF167	3.49004	0	0.28653	FALSE	0	0	6	1024	1.196e-05	73.6667	3	0	0.688745	0.572178
LILRB1	3	LILRB1	3.46436	0.333333	0.288653	FALSE	0	0	6	784	1.41e-05	39.3333	3	0	0.691954	0.354545
MAP4K2	3	MAP4K2	3.53475	0.333333	0.282905	FALSE	0	0	6	1288	1.748e-05	18	3	0	0.683156	0.360544
MT1G	3	1	2	MT1G	3.92829	0	0.254564	FALSE	0	0	6	32154	0.00030425	7.33333	3	0	0.633964	0.372549
ZFP91	3	ZFP91	3.21116	0	0.311414	FALSE	0	0	6	3348	3.955e-05	92.3333	3	0	0.723606	0.344654
PIGR	3	PIGR	3.52457	0	0.283723	FALSE	0	0	6	1202	2.648e-05	24	3	0	0.684429	0.338235
FMOD	3	FMOD	4.02081	0.666667	0.248706	FALSE	0	0	7	68	6.7e-07	17	3	0	0.622399	0.68
POP7	3	1	POP7	3.57725	0	0.279545	FALSE	0	0	6	39344	0.00055507	19.3333	3	0	0.677844	0.352564
PEX14	3	PEX14	3.27534	0	0.305312	FALSE	0	0	6	1532	2.083e-05	62	3	0	0.715582	0.342697
FAM29A	3	FAM29A	3.52236	0	0.283901	FALSE	0	0	6	370	6.82e-06	17.6667	3	0	0.684706	0.333333
KIR2DL3	3	1	2	KIR2DL3	3.35635	0.333333	0.297942	FALSE	0	0	6	350	4.73e-06	61.6667	3	0	0.705456	0.417234
ZNRF1	3	ZNRF1	3.47676	0	0.287624	FALSE	0	0	6	666	5.43e-06	76	3	0	0.690405	0.581395
ADAMTS4	3	ADAMTS4	3.75033	0	0.266643	FALSE	0	0	6	4210	0.00014543	19	3	0	0.656208	0.333333
GABRA1	3	GABRA1	3.39619	0	0.294447	FALSE	0	0	6	536	7.8e-06	51.3333	3	0	0.700476	0.37284
KNTC2	3	KNTC2	3.48871	0	0.286639	FALSE	0	0	6	276	4.88e-06	24.6667	3	0	0.688911	0.342995
ZNF337	3	1	ZNF337	3.88756	0	0.257231	FALSE	0	0	7	1530	3.559e-05	23	3	0	0.639055	0.594595
LILRB4	3	LILRB4	3.54582	0.666667	0.282022	FALSE	0	0	6	52	3.3e-07	67.6667	3	0	0.681773	0.528646
DCAF7	3	1	2	DCAF7	3.28774	0	0.304161	FALSE	0	0	6	684	8.07e-06	51.6667	3	0	0.714033	0.342342
POLM	3	POLM	3.32227	0	0.300999	FALSE	0	0	6	2274	1.142e-05	97.6667	3	0	0.709717	0.500864
SEMA4D	3	SEMA4D	3.79327	0	0.263625	FALSE	0	0	6	282	5e-06	17.3333	3	0	0.650841	0.362963
FZD5	3	FZD5	3.81319	0	0.262248	FALSE	0	0	7	2148	3.767e-05	4.66667	3	0	0.648351	0.333333
PLEKHM1	3	1	PLEKHM1	3.48163	0	0.287222	FALSE	0	0	7	440	6.11e-06	33.3333	3	0	0.689796	0.34767
ARFGAP1	3	1	ARFGAP1	3.69323	0.666667	0.270766	FALSE	0	0	7	376	4.92e-06	12.3333	3	0	0.663347	0.373737
BRP44L	3	BRP44L	3.54006	0	0.282481	FALSE	0	0	6	1330	2.632e-05	35	3	0	0.682492	0.336634
CNAP1	3	CNAP1	3.36166	0.333333	0.297472	FALSE	0	0	7	566	7.02e-06	45.3333	3	0	0.704792	0.343511
CRLF2	3	CRLF2	3.52058	0.333333	0.284044	FALSE	0	0	6	180	1.22e-06	26	3	0	0.684927	0.401042
AGTPBP1	3	AGTPBP1	3.29836	0	0.303181	FALSE	0	0	6	3012	4.706e-05	70	3	0	0.712705	0.343284
PIP	3	PIP	3.42585	0	0.291898	FALSE	0	0	7	1116	2.056e-05	29.6667	3	0	0.696768	0.337255
MAGEC1	3	MAGEC1	3.60823	0	0.277144	FALSE	0	0	7	510	1.272e-05	13	3	0	0.673971	0.333333
ZNF313	3	ZNF313	2.90173	0.666667	0.344622	FALSE	0	0	6	20	4e-08	230.667	3	0	0.762284	0.421694
CEP250	3	1	2	CEP250	3.28021	0.333333	0.304858	FALSE	0	0	6	328	3.8e-06	56	3	0	0.714973	0.373602
WDR62	3	WDR62	3.48384	0	0.287039	FALSE	0	0	6	1292	1.626e-05	35.3333	3	0	0.68952	0.346801
P29	3	P29	3.39841	0	0.294256	FALSE	0	0	6	2528	4.377e-05	38.3333	3	0	0.700199	0.333333
CD163	3	1	CD163	3.22399	0	0.310174	FALSE	0	0	6	1084	8.01e-06	71	3	0	0.722001	0.353535
OR4F17	3	1	2	OR4F17	3.99292	1	0.250443	FALSE	0	0	7	0	0	7	3	0	0.625885	0.466667
PMP22	3	1	2	PMP22	3.72156	0	0.268705	FALSE	0	0	7	2668	3.433e-05	7.66667	3	0	0.659805	0.333333
REV1	3	REV1	3.45064	0	0.289801	FALSE	0	0	7	856	2.09e-05	27.3333	3	0	0.69367	0.341991
CNP	3	CNP	3.09075	0	0.323546	FALSE	0	0	6	2526	1.851e-05	98.6667	3	0	0.738656	0.347568
FLJ12875	3	FLJ12875	3.51881	0	0.284187	FALSE	0	0	6	428	1.97e-06	76.6667	3	0	0.685148	0.620219
NUP188	3	NUP188	3.46127	0	0.288912	FALSE	0	0	7	1216	1.29e-05	39	3	0	0.692342	0.348624
RNF38	3	RNF38	3.08278	0	0.324383	FALSE	0	0	6	8408	2.358e-05	151.333	3	0	0.739653	0.437016
CADPS2	3	CADPS2	3.45861	0	0.289133	FALSE	0	0	6	1294	3.275e-05	74.6667	3	0	0.692674	0.558081
CTSL1	3	1	CTSL1	3.48429	0.333333	0.287003	FALSE	0	0	7	398	8.43e-06	42.3333	3	0	0.689464	0.33871
NDUFA9	3	1	NDUFA9	3.56884	0	0.280203	FALSE	0	0	6	740	4.54e-06	43	3	0	0.678896	0.415842
FLJ12735	3	FLJ12735	3.37539	0.666667	0.296262	FALSE	0	0	7	38	5.2e-07	42.3333	3	0	0.703077	0.381381
ZNF410	3	ZNF410	3.53298	0	0.283047	FALSE	0	0	7	1482	3.591e-05	29.3333	3	0	0.683378	0.345528
UCK2	3	UCK2	2.89863	0	0.344991	FALSE	0	0	6	4626	1.798e-05	192.333	3	0	0.762672	0.356965
GRASP	3	GRASP	3.73572	0	0.267686	FALSE	0	0	6	464	8e-06	16.3333	3	0	0.658035	0.348485
GNG4	3	GNG4	3.31474	0.333333	0.301683	FALSE	0	0	6	814	2.329e-05	48.3333	3	0	0.710657	0.345324
MTMR3	3	MTMR3	3.84816	1	0.259864	FALSE	0	0	7	0	0	14	3	0	0.64398	0.608696
RSU1	3	1	RSU1	3.23196	0	0.30941	FALSE	0	0	6	1150	1.421e-05	69	3	0	0.721005	0.346939
LTF	3	LTF	3.24037	0	0.308607	FALSE	0	0	6	660	6.74e-06	58.3333	3	0	0.719954	0.360587
SAA2	3	1	2	SAA2	3.79548	0	0.263471	FALSE	0	0	7	206	4.22e-06	6.33333	3	0	0.650564	0.410256
TRO	3	TRO	2.86897	0.333333	0.348557	FALSE	0	0	6	1754	2.044e-05	221.333	3	0	0.766379	0.36711
CABP1	3	CABP1	3.17574	0.333333	0.314887	FALSE	0	0	6	152	8.4e-07	100.333	3	0	0.728032	0.381679
WARS	3	1	WARS	3.40328	0	0.293835	FALSE	0	0	6	10208	0.0001917	26.3333	3	0	0.699591	0.333333
WNT7A	3	1	2	WNT7A	3.91235	0	0.255601	FALSE	0	0	7	3472	7.287e-05	10	3	0	0.635956	0.333333
MYL1	3	1	MYL1	3.30633	0.333333	0.30245	FALSE	0	0	6	530	4.65e-06	68.3333	3	0	0.711709	0.365591
SLAMF6	3	SLAMF6	3.43825	0.666667	0.290846	FALSE	0	0	6	4	4e-08	70	3	0	0.695219	0.526316
NFE2L3	3	NFE2L3	3.65073	1	0.273918	FALSE	0	0	7	0	0	20	3	0	0.668659	0.454545
TDRD7	3	TDRD7	4.1722	0	0.239682	FALSE	0	0	7	1038	2.072e-05	7	3	0	0.603475	0.4
ERAS	3	1	ERAS	3.21558	0.333333	0.310986	FALSE	0	0	6	1100	1.165e-05	81	3	0	0.723052	0.366667
SEPT7	3	2017-09-07	3.43648	0.666667	0.290996	FALSE	0	0	6	370	3.51e-06	33.6667	3	0	0.69544	0.350694
CNOT4	3	CNOT4	3.49801	0	0.285877	FALSE	0	0	6	462	9.6e-06	72.6667	3	0	0.687749	0.573333
GNAZ	3	GNAZ	3.3413	0.333333	0.299285	FALSE	0	0	6	162	4.55e-06	44	3	0	0.707337	0.349333
TLR10	3	TLR10	3.31784	0	0.301401	FALSE	0	0	6	1162	2.109e-05	57	3	0	0.71027	0.352201
OGG1	3	OGG1	3.35724	0	0.297864	FALSE	0	0	6	2542	4.339e-05	43.3333	3	0	0.705345	0.333333
CORO2B	3	CORO2B	3.33245	0.333333	0.30008	FALSE	0	0	6	1894	3.356e-05	62.3333	3	0	0.708444	0.350282
CD33	3	CD33	3.23285	1	0.309325	FALSE	0	0	6	0	0	119	3	0	0.720894	0.468504
SIX6	3	SIX6	3.68349	0.333333	0.271482	FALSE	0	0	6	458	1.156e-05	25	3	0	0.664564	0.391534
ROR2	3	1	ROR2	3.28066	0	0.304817	FALSE	0	0	6	9194	0.00016014	62.3333	3	0	0.714918	0.346516
ERC2	3	ERC2	3.94334	1	0.253592	FALSE	0	0	7	0	0	17.3333	3	0	0.632083	0.641975
MMP13	3	MMP13	4.13988	0	0.241553	FALSE	0	0	7	936	3.714e-05	13	3	0	0.607514	0.342857
ZNF3	3	ZNF3	3.46038	0.666667	0.288986	FALSE	0	0	6	36	4.8e-07	33.6667	3	0	0.692452	0.396078
COMP	3	1	2	COMP	3.76671	0.666667	0.265484	FALSE	0	0	6	1702	2.253e-05	26.3333	3	0	0.654161	0.405128
TRIM8	3	1	TRIM8	3.51881	0	0.284187	FALSE	0	0	6	428	1.97e-06	76.6667	3	0	0.685148	0.620219
ALAS2	3	1	2	ALAS2	3.24745	0	0.307933	FALSE	0	0	6	11778	0.00025643	61.6667	3	0	0.719068	0.333333
SUCLA2	3	SUCLA2	3.57813	0	0.279475	FALSE	0	0	6	380	1.27e-05	17.6667	3	0	0.677734	0.333333
ARMC8	3	1	ARMC8	3.53209	0	0.283118	FALSE	0	0	7	802	4.53e-06	52.6667	3	0	0.683488	0.501618
KIAA1078	3	KIAA1078	3.14431	0.333333	0.318035	FALSE	0	0	6	1274	6.7e-06	101.333	3	0	0.731961	0.360714
TSPYL4	3	1	TSPYL4	3.3444	0	0.299007	FALSE	0	0	6	4142	3.545e-05	71.3333	3	0	0.70695	0.392924
ATE1	3	ATE1	3.33643	0	0.299721	FALSE	0	0	7	3694	2.096e-05	62.3333	3	0	0.707946	0.45098
RNF150	3	RNF150	3.51881	0	0.284187	FALSE	0	0	6	428	1.97e-06	76.6667	3	0	0.685148	0.620219
SNUPN	3	1	SNUPN	3.52501	0	0.283687	FALSE	0	0	7	752	9.39e-06	19.3333	3	0	0.684374	0.352564
MRPS9	3	MRPS9	3.46791	0	0.288358	FALSE	0	0	6	1776	3.978e-05	24.3333	3	0	0.691512	0.338164
KCNJ1	3	1	KCNJ1	3.39398	0.333333	0.294639	FALSE	0	0	6	1110	1.262e-05	48.3333	3	0	0.700753	0.352941
ZNF331	3	ZNF331	3.46392	1	0.28869	FALSE	0	0	6	0	0	30	3	0	0.69201	0.38961
SMU1	3	SMU1	3.18327	0	0.314143	FALSE	0	0	6	12358	0.00012158	95	3	0	0.727092	0.396624
MEP1B	3	MEP1B	3.21071	0	0.311457	FALSE	0	0	6	3902	4.035e-05	80	3	0	0.723661	0.359091
COCH	3	COCH	3.98362	0	0.251028	FALSE	0	0	7	750	6.41e-06	20	3	0	0.627047	0.452381
DNAJB8	3	DNAJB8	3.32138	0.333333	0.30108	FALSE	0	0	6	294	1.76e-06	41	3	0	0.709827	0.376543
CTDSP2	3	1	2	CTDSP2	3.22931	0	0.309664	FALSE	0	0	6	146	1.58e-06	68	3	0	0.721337	0.372222
GLIS2	3	1	GLIS2	3.25454	0	0.307263	FALSE	0	0	6	1140	1.146e-05	55.6667	3	0	0.718183	0.341667
RND3	2	RND3	3.44533	0	0.290248	FALSE	0	0	6	640	7.81e-06	35.5	2	0	0.694334	0.507353
FMNL3	2	1	2	FMNL3	3.74635	0	0.266927	FALSE	0	0	6	28	2.1e-07	26.5	2	0	0.656707	0.6375
NFATC3	2	1	NFATC3	3.31076	0	0.302046	FALSE	0	0	6	428	9.96e-06	85	2	0	0.711155	0.5
SIGLEC12	2	SIGLEC12	3.54936	1	0.281741	FALSE	0	0	6	0	0	89.5	2	0	0.68133	0.716
FLJ23375	2	FLJ23375	3.32891	0	0.300399	FALSE	0	0	6	548	2.63e-06	74	2	0	0.708887	0.51773
APLN	2	APLN	4.09827	0	0.244005	FALSE	0	0	7	54704	0.00088535	9.5	2	0	0.612716	0.5
SIGLEC10	2	1	2	SIGLEC10	3.32979	0	0.300319	FALSE	0	0	6	652	3.57e-06	81	2	0	0.708776	0.526316
SEMA4B	2	SEMA4B	3.74192	0	0.267242	FALSE	0	0	6	272	7.85e-06	24	2	0	0.65726	0.511111
GNG10	2	1	2	GNG10	3.67641	0	0.272005	FALSE	0	0	7	94	7.4e-07	11.5	2	0	0.665449	0.552632
PRPH2	2	PRPH2	4.03054	0	0.248105	FALSE	0	0	6	350	6.56e-06	10.5	2	0	0.621182	0.5
SCD	2	1	2	SCD	3.35945	0	0.297668	FALSE	0	0	6	60850	0.00088535	68.5	2	0	0.705069	0.5
CHRNB4	2	CHRNB4	3.79371	1	0.263594	FALSE	0	0	7	0	0	13	2	0	0.650786	0.541667
CCL20	2	CCL20	3.25631	0	0.307096	FALSE	0	0	6	17366	0.00021188	89	2	0	0.717961	0.502857
MINPP1	2	MINPP1	3.36078	0	0.29755	FALSE	0	0	6	746	7.54e-06	79.5	2	0	0.704903	0.506452
CCL8	2	CCL8	3.94467	0	0.253507	FALSE	0	0	6	874	9.82e-06	19	2	0	0.631917	0.529412
RNF166	2	RNF166	3.53386	0	0.282976	FALSE	0	0	6	20	4e-08	105.5	2	0	0.683267	0.870833
TRDN	2	TRDN	3.91943	0	0.255139	FALSE	0	0	6	196	4.77e-06	9.5	2	0	0.635071	0.5
RNF26	2	RNF26	3.53386	0	0.282976	FALSE	0	0	6	20	4e-08	105.5	2	0	0.683267	0.870833
MYOM1	2	1	2	MYOM1	3.56485	1	0.280517	FALSE	0	0	6	0	0	28	2	0	0.679394	0.528302
KLRC1	2	KLRC1	3.54936	1	0.281741	FALSE	0	0	6	0	0	89.5	2	0	0.68133	0.716
SSX5	2	SSX5	3.7127	0	0.269345	FALSE	0	0	6	102	3.08e-06	19	2	0	0.660912	0.5
CARD8	2	CARD8	3.22178	0	0.310387	FALSE	0	0	6	438	3.45e-06	95.5	2	0	0.722278	0.513587
SBF2	2	SBF2	3.37539	0	0.296262	FALSE	0	0	6	328	7.17e-06	82.5	2	0	0.703077	0.503086
F13B	2	F13B	4.49934	1	0.222255	FALSE	0	0	7	0	0	7	2	0	0.562583	0.636364
ADIPOR2	2	1	2	ADIPOR2	3.87472	0	0.258083	FALSE	0	0	6	55466	0.00088535	6.5	2	0	0.64066	0.5
FBLIM1	2	FBLIM1	3.4378	1	0.290883	FALSE	0	0	6	0	0	42.5	2	0	0.695274	0.615942
KLRK1	2	KLRK1	3.73174	0	0.267972	FALSE	0	0	7	126	3.81e-06	32.5	2	0	0.658533	0.516393
[truncated: 270 more rows]

## Sheet: Sheet2
Table S4. The list of 733 candidate genes
Gene Symbol	Degree
UBC	481
TP53	243
YWHAZ	192
ESR1	188
GRB2	180
SRC	178
EP300	176
CREBBP	161
TRAF6	159
HDAC1	156
FOS	147
MYC	136
AR	133
EGFR	132
SMAD3	130
JUN	129
SMAD2	129
BRCA1	124
IKBKG	123
CSNK2A1	123
ACTA1	123
RAF1	122
YWHAG	121
CTNNB1	120
MAPK1	118
IKBKE	116
PIK3R1	114
FYN	113
MDM2	113
PRKCD	112
ABL1	109
RXRA	109
AKT1	107
UBE2D3	107
NR3C1	106
UBE2D2	104
RB1	103
PTPN6	101
PRKCA	101
ACTB	100
HSPCA	100
RELA	100
SP1	99
HDAC2	94
UBE2I	93
SMAD4	91
NFKB1	88
STAT3	88
MCC	85
PRKACA	85
UBB	84
RARA	82
PCNA	82
VHL	82
CALM1	80
UBA52	79
MAPK3	79
PTPN11	78
CSNK2B	78
PRKDC	78
NCOR1	78
CDKN2A	77
PLCG1	77
LCK	76
CBL	76
SHC1	76
YWHAQ	75
YWHAB	74
SIN3A	74
RPS27A	74
HDAC3	74
PARP1	74
PML	73
SMARCA4	73
TGFBR1	72
HSPA8	72
PPP2CA	71
HIST1H3A	70
YWHAE	70
H2AFX	70
NCOR2	69
NPM1	69
PPP2R2B	69
STAT1	68
FHL2	68
NFKBIA	67
TBP	67
CRK	67
PCAF	66
NCOA1	66
NCOA3	66
RUVBL2	65
PPP2R1A	65
GSK3B	65
PPARG	64
MCM7	64
EEF1A1	64
NR4A1	64
CEBPB	64
SMAD1	63
SUMO1	63
TNFRSF1A	63
LYN	63
G22P1	62
IKBKB	62
VIM	62
TUBB	62
SRRM2	62
SUMO2	62
NCK1	62
HDAC4	61
POLR2A	61
MAPK14	61
JAK2	61
FLNA	61
MAGED1	61
CDK1	60
GC20	59
RAE1	59
RUNX1	59
DAXX	58
SYK	58
HSPA4	58
PREI3	58
ERBB2	58
PIN1	58
HSPCB	57
CDKN1A	57
EPB41	57
HIF1A	57
PPARBP	56
PRKCZ	56
PLK1	56
FLJ20257	56
SIRT1	56
PRKAB1	56
NCOA6	55
XRCC5	55
RBBP4	55
GNB2L1	55
VDR	55
MAP3K14	55
CSNK2A2	55
APP	54
MCM3	54
RIF1	54
IRS1	54
CHUK	54
DHX9	54
STUB1	54
SGK	54
HTATIP	54
SFN	54
SRRM1	53
RNPS1	53
SMURF1	52
TERF1	52
CDK9	52
ESR2	52
ATM	52
MAPK8	52
CASP8	52
THRB	51
NEK6	51
TRIM28	51
CDC42	50
RBBP7	50
PAK1	50
NFKB2	50
APC	50
HGS	50
ACTG1	50
ZBTB16	49
ARF6	49
SMURF2	49
PSMC5	49
VAV1	49
CREB1	49
TERF2	49
CAV1	49
HSP90AA1	48
THRA	48
E2F1	47
ATXN1	47
MEN1	47
COPS5	47
HSPA5	47
HDAC5	47
HSPA1A	46
MYOD1	46
HIST1H4A	46
RAC1	46
CHM	46
YWHAH	46
CDK4	45
CDH1	45
BCL2	45
TSC22D1	45
PPP1CA	45
RUNX2	45
JAK1	44
ITGB4BP	44
XPO1	44
ARRB1	44
CHD3	44
CEBPA	43
MCM2	43
FANCA	43
FN1	43
CDC37	43
ARRB2	43
SET	43
NEDD4	43
CCND1	42
SQSTM1	42
SF3A2	42
DDB1	42
PRKCB	42
STAT5A	42
ETS1	41
MLH1	41
ATR	41
TNFRSF1B	41
NCOA2	41
HNRPM	41
TLE1	41
ATN1	41
SKB1	41
NCL	41
DNCL1	41
BCR	40
COPS6	40
AIRE	40
PSMC2	40
INSR	40
MGMT	40
PARK2	40
YY1	40
PTK2B	40
PSMA1	40
KPNA2	39
HNRPA1	39
CHEK1	39
PAK2	39
PSMD4	39
TUBB4	39
BTRC	39
TBK1	39
KRT18	39
CDC5L	38
VCP	38
TOP2A	38
SMARCC1	38
RBL1	38
PRKCE	38
XRCC6	38
DISC1	38
NFKBIB	38
p44S10	37
NRIP1	37
TNIK	37
PPP2CB	37
MAPT	37
HIST4H4	37
ATF2	37
GH1	37
SMC1L1	37
RPS6KB1	36
FTSJ1	36
EEF1G	36
HDAC6	36
SRF	36
CLTC	36
EEF1D	36
TADA2L	36
DCTN1	36
SETDB1	36
USP7	36
MCM5	35
SPTAN1	35
DIPA	35
ILK	35
MLL	35
UBQLN4	35
GTF2B	35
NDRG1	35
NR0B2	35
MAP3K5	34
STAT5B	34
MYH9	34
CHAF1A	34
DNCH1	34
GCN5L2	34
SKIL	34
MYB	34
STRN	34
DDX20	34
ACTN1	34
PSMD2	34
BTK	34
PCBP1	34
HDAC7A	34
ING1	33
TSG101	33
MCM6	33
IGF1R	33
NOTCH1	33
PTP4A3	33
PDGFRB	33
GAPD	33
PDPK1	33
KAT5	33
CSK	33
PHB2	33
KHDRBS1	33
SMAD9	32
MAP2K1	32
ANXA2	32
C1orf103	32
SFPQ	32
HD	32
FNBP3	32
H3F3A	32
GABARAPL2	32
BCL3	32
HIST1H3E	32
HMGB1	32
STRN3	32
POU2F1	32
PSMA3	32
CCDC85B	32
SNRPB	32
RPA2	32
COL2A1	31
PHLDA3	31
ZAP70	31
TAF9	31
SOS1	31
KAT2B	31
DNM2	31
PABPC1	31
DLG4	31
CHD4	31
GAB2	31
DVL2	31
TCF3	31
FASLG	31
MAX	31
ITCH	31
TCP1	31
IRS2	31
MAP3K7	31
PSMC1	31
HNRPL	31
SUV39H1	30
AKAP9	30
TAL1	30
RXRB	30
SKIIP	30
EIF2C4	30
GTF2F1	30
MAPRE1	30
SIAH1	30
ATF4	30
HRAS	30
CBX5	30
SMARCB1	30
BARD1	30
STK24	30
KIT	30
ITGB1	30
VIL2	29
UNC119	29
PPARA	29
JUND	29
SMARCE1	29
GIT1	29
CUL4A	29
GSTK1	29
PHB	29
HSPB1	29
PSMD13	29
PSEN1	29
PPARGC1A	29
CARM1	29
ATF3	29
BAT3	29
KIAA1967	29
TUBA4A	29
GTF2E2	28
CDK5	28
DNMT1	28
BCAR1	28
PPP2R1B	28
ch-TOG	28
FUS	28
RHOA	28
TGFBR2	28
AES	28
STRAP	28
SUMO4	28
CD2BP2	28
CCT5	28
RPS3A	28
TXN	28
IQGAP1	28
PRKCG	28
EIF2C2	28
GADD45G	28
PTPRC	28
ERBB4	28
AXIN1	28
MDM4	28
PSMC6	27
KDR	27
UCHL5	27
PINX1	27
TAF1	27
DDX17	27
TNFRSF14	27
DAZAP2	27
BRD7	27
PSMA6	27
TUBA1	27
FAS	27
DAB2	27
PCBP2	27
LMNA	26
PIK3CA	26
FOXO3A	26
PSMC4	26
RNF11	26
PLEC1	26
ITGB3	26
NEDD8	26
CDK7	26
CCNB1	26
HMGA1	26
SNRPD2	26
BMPR1B	26
HNRPA2B1	26
MET	26
GRB10	26
CFLAR	26
HTT	26
GTF2F2	26
NFKBIE	26
FADD	26
NR1H2	26
SIRT2	26
NR1H3	26
ADRBK1	26
GABARAP	25
JAK3	25
S100A4	25
PPFIA1	25
RBM9	25
EPAS1	25
NFE2	25
FLNB	24
SNRPN	24
AATF	23
RFC4	23
FALZ	21
SNRPF	21
FNBP1	20
CLNS1A	20
TPR	20
VCAN	19
SLC3A2	18
VEGFA	18
ACACA	17
PLXNB1	17
EXOSC1	17
MYH11	17
RAB8A	16
SGK1	16
CYTH2	16
DHX30	15
BAG3	15
ACTR6	15
COX17	15
RYR1	15
CSDA	15
IRF5	14
NPHP1	14
RPS6KA2	14
APITD1	13
STK38	13
CRELD1	13
TNNI2	13
PSMA5	13
SEPHS1	12
EFNB1	12
S100P	11
TACC1	11
MYOZ1	11
TCAP	11
TGFB3	11
CLTA	11
AIMP2	11
PIP5K1C	10
FGG	10
RAB1B	10
UCHL3	9
PRIC285	9
SIVA	9
MT2A	9
MYOCD	9
CCNDBP1	9
RPS26	9
UBA1	8
BAI2	8
MYL2	8
MEPE	8
CKM	8
PLA2G2A	7
RALY	7
GRM3	7
PHIP	7
DOK3	7
BOC	7
MYH7	7
SLC25A22	7
NIPBL	7
TSLP	6
TRAM1	6
RORC	6
CAP1	6
CHRNA4	6
CSN3	6
TNNT3	6
KIF1A	6
IL13RA1	6
ASNS	6
DUB3	5
ATP2A1	5
H2AFZ	5
DDX18	5
MFAP2	5
MRPL14	4
MYBPC1	4
PRPH	4
POP5	4
MKKS	4
TRIB1	4
ACTR1B	4
CLDN5	4
BHLHB3	4
COMP	3
OR4F17	3
WDR45	3
DAD1	3
MT1G	3
CEP250	3
WNT7A	3
SLN	3
KIR2DL3	3
SAA2	3
CD8B	3
MYH6	3
DCAF7	3
HFE	3
PMP22	3
CTDSP2	3
ANKRD1	3
ALAS2	3
SOX11	2
COMMD3	2
KLK4	2
MRFAP1L1	2
CKAP5	2
IL17B	2
MRPL53	2
ADIPOR2	2
MYOM1	2
FMNL3	2
SIGLEC10	2
GNG10	2
SCD	2
CDK2AP2	2
NBL1	2
TMEM147	2
ATP6AP2	2
PRSS21	1
SAMM50	1
CLN5	1
MYBPH	1
FRAT2	1
CD320	1
MYBPC2	1
MB	1
HSPB7	1
IDS	1
RNF220	1
AMPD1	1
GRIK4	1
ESPN	1
UTS2D	1
FOLR1	1
TMEM14C	1
GCAT	1
HBG1	1
CMTM8	1
TIAM2	1
CART1	1
ENOPH1	1
PSCD4	1
UNC45A	1
IGFL3	1
SPAG7	1
GPR124	1
PARVG	1
ZMYM6	1
APLNR	1
DERA	1
TNNC2	1
MGC3771	NA
NSMCE2	NA
ODF4	NA
PAMR1	NA
C1ORF25	NA
MAGEA10	NA
REXO1L1	NA
DKFZP686I15217	NA
PANX3	NA
C20ORF166	NA
GAGE12J	NA
PFKFB4	NA
STAG3L1	NA
GMDS	NA
PSRC1	NA
INF2	NA
MIR548I1	NA
COX7A2	NA
LOC729384	NA
MIR210	NA
MRPS11	NA
LOC730811	NA
CIDEC	NA
C17ORF81	NA
SMOX	NA
LOC648148	NA
FLJ42957	NA
FLJ36070	NA
FAM65C	NA
LOC650368	NA
SLC36A2	NA
LRRC8A	NA
PPDPF	NA
EFR3A	NA
CENPN	NA
DNAH2	NA
FRG2B	NA
REXO1L2P	NA
C9ORF47	NA
RUFY4	NA
TM9SF1	NA
LPIN2	NA
C16ORF71	NA
DSCR8	NA
FBXL20	NA
MTO1	NA
FAM110B	NA
GK5	NA
ATP6V1B2	NA
DUX5	NA
KLHL21	NA
AMZ2	NA
RPL23AP7	NA
ZNF213	NA
ZNF135	NA
FLJ45445	NA
FOXRED1	NA
TM6SF2	NA
FGD5	NA
FAM39DP	NA
LOC126536	NA
TNS3	NA
LOC653544	NA
TMEM219	NA
ZNF93	NA
TMEM136	NA
MIR648	NA
UCA1	NA
CBWD3	NA
FLJ36031	NA
SCRG1	NA
HPDL	NA
PRAMEF10	NA
CACNG6	NA
PPIAL4G	NA
CDC123	NA
IGLL3	NA
DUX3	NA
RPUSD1	NA
GAGE4	NA
JSRP1	NA
C20ORF103	NA
GAGE12B	NA
CALML6	NA
IFI44L	NA
GAGE12C	NA
XAGE1A	NA
TPCN1	NA
VEZF1	NA
SYNPO2L	NA
TMEM110	NA
TMEM119	NA
DUX4	NA
SYNGR1	NA
ZNF260	NA
HFE2	NA
TUBB2B	NA
SLC13A5	NA
PRAMEF6	NA
PRR20C	NA
TMUB1	NA
TMEM209	NA
TSPY2	NA
MIR99A	NA
SLC38A10	NA
C22ORF32	NA
XIRP2	NA
WDR72	NA
LOC554235	NA
FAM179A	NA
ZNF532	NA
FLJ40113	NA
SERPINA6	NA
CXORF26	NA
HSPC111	NA
MRPS30	NA
